# Supplementary material for: Distinct MicroRNA Subcellular Size and Expression Patterns in Human Cancer Cells
Source: Int J Cell Biol. 2012 Feb 12;2012:672462. doi: 10.1155/2012/672462 (PMC3296955; doi:10.1155/2012/672462)
Supplement: Supplementary file 1 — Figure S1. Length distribution of small RNAs in MDA-MB-231. Figure S2. The small RNA genome location distribution near or within the coding genes. Figure S3. Western bolt. Analysis of expression of Lamin A/C, GAPDH and beta-action in the extracts of nucleus, cytoplasma and whole cell. Table S1. Total sequencing small RNAs genome mapping. Table S2. Small RNA sequences annotation. Table S3. The relationship between small RNAs loci and coding genes loci. Table S4. The nuclear small RNAs annotated as known piRNAs. Table S5. Predicted new microRNAs. Table S6. Isoforms of microRNAs. Table S7. MicroRNAs NCR values varied significantly between different cell lines. [file 672462.f1.xls]

## Sheet: 文件信息
数据报告
数据信息
布局文件	miRHuman_10.1_AUR_0080314.xls
原始图像文件	01_AUR_080579-0403-390-490.tif
处理后图像A文件	01_AUR_080579-0403-390cy3.tif
处理后图像B文件	01_AUR_080579-0403-490cy5.tif
数据处理软件	ArrayPro
过滤条件	Morphological filter, Open, 3×3 Cross, 2 passes
实验信息
实验日期	2008-04-03
芯片 ID	01_AUR_080579
样品来源
样品 A
样品 ID	1
收样日期	2008-03-14
标记染料	Cy3
样品 B
样品 ID	2
收样日期	2008-03-14
标记染料	Cy5
数据采集条件
扫描仪	Axon GenePix 4000B Microarray Scanner
像素尺寸	10 µm
样品 A 增益	390
样品 B 增益	490
数据分析信息
样品 A 背景值	131.102
样品 A 背景标准偏差	4.21577
样品 B 背景值	32.4259
样品 B 背景标准偏差	0.927525
归一化方法	Global Normalization
客户信息
机构名称
定单信息
收单日	2008-03-14
客户 PO Number
销售定单 No.	2319-S81191
支持信息
技术联系	Customer Support
电话	713-664-7087
Email	support@lcsciences.com

## Sheet: 显著差异数值
No.	探针_ID	Sample A 信号中值	Sample B 信号中值	log2 (Sample B / Sample A)
1	he_28473	63.1377	27785.4	8.78161
2	he_28474	202.074	40714	7.62968
3	he_31029	41.3718	7978.22	7.59128
4	he_28476	69.7231	13217.5	7.54451
5	he_981	29.6201	5754.81	7.46379
6	he_9721	45.4131	7936.33	7.42074
7	he_360	1	161.285	7.32933
8	he_593	62.1465	9811.4	7.24551
9	he_31030	176.835	29537.6	7.23854
10	he_31032	157.369	23406	7.03839
11	he_9720	23.8798	3180.81	6.99379
12	he_28482	153.267	20645.1	6.96037
13	he_21873	32.6428	3950.13	6.91884
14	he_9463	145.277	15913.4	6.77842
15	he_31031	81.3616	7908.26	6.49904
16	he_21871	10.7956	574.617	6.44916
17	he_596	7.57328	606.286	6.32294
18	he_37889	20.9791	1662.54	6.30059
19	he_38204	6.00286	451.48	6.23287
20	he_25588	4.9412	362.748	6.19796
21	he_22404	2.77344	202.487	6.19001
22	he_31033	9.16942	663.284	6.17665
23	he_14386	80.8423	5777.79	6.15129
24	he_2937	19.5232	1447.6	6.14597
25	he_28480	173.367	12404.1	6.11517
26	he_25586	7.66572	503.019	6.0912
27	he_37892	10.188	632.963	5.95718
28	he_17441	75.911	4554.65	5.95524
29	he_46744	111.596	6974.62	5.9355
30	he_16349	36.9326	2224.1	5.93287
31	TU194	1.38677	71.5052	5.72905
32	he_34734	1.52881	73.4934	5.65971
33	he_14393	22.7631	983.777	5.53027
34	he_21059	20.0924	852.471	5.52021
35	he_10552	13.7992	600.572	5.44368
36	he_17407	38.7289	1679.99	5.4389
37	he_21872	9.04822	372.659	5.36408
38	he_32353	40.9503	1539.97	5.21612
39	he_35269	17.9272	640.234	5.15838
40	he_21594	197.966	7593.47	5.13993
41	he_810	2.856	89.2329	5.11712
42	he_36649	3.39309	116.334	5.1115
43	he_598	13.5846	431.875	4.99057
44	he_31383	20.417	644.784	4.98098
45	he_51788	17.1497	523.055	4.93071
46	he_25712	2438.59	85.6963	-4.85337
47	he_51088	10.7498	281.283	4.70964
48	he_31018	169.157	4321.6	4.66139
49	he_42318	28.3324	677.953	4.45754
50	he_28483	20.7012	422.095	4.36876
51	he_4625	4.2442	81.9141	4.34932
52	he_11415	17.3999	312.025	4.24985
53	he_42311	24.3905	409.821	4.10456
54	he_2066	344.739	20.5189	-4.07048
55	he_52673	19.3527	316.635	4.03221
56	xbz_701	975.913	14410.5	3.86333
57	he_50723	2245.92	181.33	-3.79385
58	he_1492	1296.12	17253.3	3.76396
59	he_40976	34.5071	461.64	3.7418
60	he_25728	10620.6	815.718	-3.73214
61	he_36553	29.0264	346.731	3.67223
62	TU448	6.35546	80.6256	3.66865
63	he_365	132.954	1795.71	3.65576
64	he_41344	24.2557	301.716	3.6368
65	xbz_1041	217.863	18.2811	-3.57499
66	he_11413	22.9114	243.793	3.41069
67	he_39736	5190.31	499.782	-3.39195
68	xbz_12775	10020.2	938.958	-3.37652
69	he_16347	6.73128	62.3708	3.20929
70	he_40142	5682.1	50843.7	3.18224
71	TU398	22.3296	172.28	3.12266
72	TU56	1558.25	191.629	-3.11032
73	he_36543	1288.89	150.671	-3.0987
74	xbz_19721	603.894	75.5451	-3.09095
75	he_36788	766.76	6465.65	3.07595
76	he_7363	3945	480.052	-3.03876
77	he_52065	20.0275	168.523	3.0202
78	TU416	40.533	301.312	3.00405
79	xbz_21086	77.7556	10.7648	-2.96405
80	he_27218	6269.92	807.074	-2.95098
81	he_28969	4780.36	628.291	-2.92762
82	he_15588	5218.64	694.53	-2.92693
83	he_9627	26.1096	197.919	2.92226
84	xbz_9265	3328.87	444.008	-2.90637
85	xbz_1241	405.469	54.9501	-2.8834
86	he_23413	4472.77	642.832	-2.8034
87	xbz_27253	55.4915	385.724	2.79723
88	TU452	158.361	1158.87	2.77072
89	xbz_11688	487.478	71.4511	-2.77031
90	he_17291	3130.58	460.818	-2.76331
91	he_28479	10.5788	70.1123	2.75174
92	he_38408	62.5707	12.1179	-2.72741
93	he_46242	15879	2453.26	-2.69435
94	he_44379	1391.69	202.935	-2.66619
95	he_37871	4535.85	759.55	-2.6604
96	he_29648	8686.02	1378.98	-2.6551
97	he_2348	6035.28	960.093	-2.65217
98	xbz_12548	20510.6	3273.8	-2.64733
99	he_51830	33.2633	207.689	2.64242
100	he_25776	9327.75	1651.06	-2.63706
101	TU782	31.8268	201.669	2.60928
102	he_5069	182.323	1183.13	2.5974
103	he_24979	1086.59	6532.16	2.58775
104	he_30566	8820.35	1477.28	-2.58426
105	he_2174	4711.07	808.679	-2.57874
106	he_41264	24.7515	142.408	2.52444
107	he_20180	1083.89	192.585	-2.52438
108	he_49840	245.329	44.9503	-2.50608
109	he_46034	6323.97	1116.05	-2.50298
110	he_197	449.097	79.2685	-2.50221
111	he_35232	793.228	4403.3	2.48998
112	he_19454	2025.46	11362.3	2.48793
113	he_46408	7189.6	1292.08	-2.47874
114	he_25674	448.014	80.4359	-2.47763
115	xbz_28951	1116.64	199.287	-2.4759
116	xbz_3740	64.8003	12.2096	-2.47109
117	he_53233	164.771	29.0142	-2.4634
118	he_41210	7572.29	1355.42	-2.43199
119	he_9090	229.036	1272.58	2.42985
120	he_129	21.7804	114.699	2.42755
121	he_26104	1131.71	229.647	-2.42089
122	xbz_10531	15.4868	81.385	2.42088
123	he_33649	3201.79	579.014	-2.41291
124	he_35693	299.749	58.2502	-2.39714
125	he_35178	4574.56	889.07	-2.3961
126	he_52722	924.063	180.999	-2.38474
127	he_37851	6424.15	1300.22	-2.3814
128	he_20416	241.138	1196.26	2.36831
129	he_3702	32.6991	177.52	2.36595
130	he_4967	5627.31	1102.94	-2.35109
131	he_21880	42.8446	217.088	2.34109
132	he_9638	88.092	21.3904	-2.3189
133	he_8209	157.374	32.2602	-2.31412
134	he_19455	779.529	3662.27	2.3052
135	he_27876	1308.23	6340.04	2.28627
136	he_20915	3430.01	702.717	-2.28041
137	he_44807	1407.49	6641.83	2.27742
138	xbz_16624	874.834	4175.64	2.25492
139	he_30153	713.56	3369.34	2.23842
140	he_40174	579.531	2658.44	2.19762
141	xbz_27400	188.382	36.0054	-2.18275
142	he_25733	202.144	41.5971	-2.17725
143	he_50815	8230.49	1793.32	-2.17315
144	he_47535	106.052	23.2568	-2.17066
145	xbz_29477	253.223	63.0677	-2.16824
146	he_51888	6327.18	1370.82	-2.15958
147	xbz_11018	454.131	1787.93	2.15259
148	he_50521	8368.35	1873.23	-2.15076
149	xbz_13762	71.3263	15.3736	-2.14175
150	he_40953	2815	12515.1	2.13565
151	he_21018	438.478	1905.44	2.13451
152	he_2031	8530.95	1933.67	-2.13382
153	he_23737	1372.53	317.662	-2.13145
154	he_41259	7524.98	1666.22	-2.1282
155	he_29964	8887.36	2039.8	-2.12333
156	he_41333	2992.64	13035	2.12291
157	he_36597	228.456	936.246	2.1153
158	xbz_14983	13486	55258.3	2.08815
159	he_26137	4386.22	1055.04	-2.08349
160	he_28961	9735.63	2267.07	-2.08103
161	he_21566	7199.89	1712.82	-2.0716
162	he_52245	8402.91	2002.8	-2.06887
163	he_9882	9452.8	2269.29	-2.0687
164	xbz_13757	679.396	177.824	-2.05492
165	he_20870	102.11	27.3511	-2.03794
166	xbz_14113	131.357	38.6522	-2.02733
167	he_13856	9294.29	2301.37	-2.01385
168	xbz_14129	9962.02	2438.93	-2.01054
169	he_46082	184.202	46.8948	-1.97379
170	he_24730	121.068	445.012	1.95776
171	he_33647	8528.98	2353.75	-1.94826
172	xbz_15821	223.995	58.895	-1.92636
173	he_33220	981.158	3630.24	1.88751
174	xbz_21088	187.672	57.7105	-1.88235
175	he_27079	20.1874	75.239	1.8418
176	he_25084	682.966	190.651	-1.84088
177	he_16755	1887.6	534.703	-1.81975
178	he_9775	2545.49	722.718	-1.81644
179	he_37062	733.416	208.45	-1.8117
180	xbz_8958	1799.75	517.455	-1.79829
181	he_28825	284.598	77.9499	-1.79682
182	he_33125	822.128	220.607	-1.79367
183	he_51356	1643.61	5968.67	1.77599
184	he_53515	226.115	60.9329	-1.76187
185	he_18129	27.1166	92.089	1.75576
186	he_21878	304.018	1026.5	1.7555
187	he_22725	6647.62	22379.3	1.75126
188	he_38410	219.072	65.4025	-1.74399
189	he_20271	216.59	718.073	1.71857
190	xbz_20370	669.719	217.583	-1.71068
191	he_38587	10041.4	31839.8	1.7081
192	xbz_5349	644.479	197.643	-1.70524
193	he_38779	221.733	58.4347	-1.70196
194	he_50065	5229.64	1572.92	-1.70098
195	he_11793	3540.86	11643.3	1.69327
196	xbz_10964	258.137	821.848	1.69191
197	he_12202	1407.7	451.1	-1.68733
198	xbz_16788	200.125	684.381	1.68663
199	xbz_28632	13500.4	43333.6	1.68248
200	TU79	1460.53	4475.18	1.67484
201	he_9860	650.583	211.484	-1.67453
202	he_36376	598.722	189.549	-1.67293
203	he_44968	26.2824	83.6929	1.67101
204	TU285	1639.97	5077.25	1.66711
205	he_32	747.536	2440.95	1.66639
206	he_51982	128.928	36.2884	-1.64944
207	he_11181	3285.6	10415.1	1.64628
208	he_10229	2535.35	808.503	-1.64212
209	xbz_6473	1804.63	585.62	-1.63448
210	he_532	234.363	74.3712	-1.63446
211	xbz_8049	2671.7	868.169	-1.61669
212	xbz_20066	598.263	198.261	-1.61144
213	xbz_251	167.047	54.9628	-1.60132
214	xbz_11894	701.87	2074.84	1.57999
215	xbz_3733	161.724	51.6298	-1.57463
216	he_47496	9868.37	3314.4	-1.57406
217	xbz_4920	9389.73	26987.8	1.55875
218	xbz_5066	168.724	64.0384	-1.55851
219	he_24403	1597.78	538.134	-1.55498
220	he_6835	305.33	113.534	-1.55468
221	he_30405	249.338	729.363	1.54854
222	xbz_26076	9910.9	3399.31	-1.54377
223	he_27875	210.418	609.956	1.54024
224	he_25747	12768.8	4218.34	-1.53732
225	he_34254	2647.78	934.685	-1.53148
226	xbz_27255	718.31	238.207	-1.52009
227	he_53548	253.11	88.288	-1.51947
228	he_35559	1732.75	4961.17	1.51762
229	he_40162	9625.38	26919.6	1.51581
230	he_7253	2210.05	751.244	-1.51394
231	he_4723	2656.82	7850.4	1.50963
232	he_49594	796.945	278.048	-1.49668
233	he_1011	647.273	1871.52	1.49563
234	he_31221	195.612	74.3382	-1.49552
235	he_20181	222.476	83.0197	-1.48511
236	xbz_27257	929.892	345.288	-1.47068
237	he_15140	2361.3	855.947	-1.46398
238	he_25704	57.2563	162.088	1.46184
239	xbz_2993	269.266	104.786	-1.45216
240	he_17478	235.212	87.291	-1.43006
241	he_50707	5550.06	13450.7	1.42607
242	he_9059	598.925	1590.31	1.42456
243	xbz_73	34.3798	91.9437	1.41919
244	he_24981	1598.98	4178.32	1.40614
245	he_6833	151.676	58.5513	-1.3987
246	he_25688	142.943	59.1567	-1.39585
247	xbz_5186	3318.17	8665.08	1.38483
248	he_36556	1381.48	536.273	-1.38282
249	he_444	9866.85	25168.8	1.36355
250	xbz_15227	871.454	2211.59	1.36061
251	he_9307	219.026	84.1455	-1.35157
252	he_1012	3515.55	1397.66	-1.34402
253	he_4064	2313.37	6206.59	1.33104
254	he_10527	13867.8	5565.31	-1.32633
255	he_36383	439.601	183.12	-1.31881
256	xbz_9344	241.884	97.8058	-1.3039
257	xbz_27256	154.298	62.7382	-1.29166
258	he_25748	3279.57	1317.71	-1.28406
259	he_5626	236.324	96.6613	-1.28097
260	he_25699	6442.63	2924.19	-1.25623
261	he_49596	940.442	376.457	-1.25473
262	xbz_27866	3454.23	8216.2	1.25011
263	xbz_28291	775.033	275.293	-1.23654
264	xbz_26372	680.052	300.555	-1.23476
265	he_48075	766.267	329.602	-1.21585
266	he_8861	207.346	89.3671	-1.21433
267	he_20936	2839.46	1226.09	-1.21156
268	xbz_2650	13598.1	30749	1.21147
269	xbz_29533	633.012	297.835	-1.20735
270	he_9049	16410.7	39243	1.18918
271	TU327	1023.24	2406.43	1.18899
272	he_51417	801.214	333.047	-1.18553
273	he_48015	1526.16	685.077	-1.17357
274	he_38904	17625.4	7854.07	-1.16644
275	xbz_26952	661.15	300.327	-1.16519
276	he_1586	6592.96	2917.99	-1.16293
277	he_5126	16759.2	40155.5	1.15181
278	xbz_20069	465.951	200.385	-1.14131
279	xbz_250	1076.78	487.294	-1.13516
280	he_531	911.939	434.209	-1.13315
281	xbz_25639	9138.08	4136.68	-1.12992
282	xbz_13680	1551.41	3541.37	1.12467
283	he_20896	5245.02	2395.31	-1.12434
284	xbz_4815	196.246	90.3539	-1.12063
285	xbz_14021	1254.05	580.311	-1.1117
286	he_20939	10809.3	5152.44	-1.10165
287	he_25101	7310.17	3495.39	-1.09373
288	he_52701	2065.69	970.191	-1.09029
289	he_38247	9389.4	4280.27	-1.09027
290	he_36506	478.705	220.234	-1.08697
291	xbz_13763	8379.26	3957.93	-1.08396
292	he_37337	4090.79	1967.48	-1.08079
293	he_26307	8801.51	18608	1.07569
294	he_36832	8144.06	3873.54	-1.0721
295	he_53591	374.259	176.944	-1.06187
296	he_39456	5612.13	2649.69	-1.06054
297	he_13388	1087.42	524.482	-1.05697
298	xbz_9343	1563.57	744.992	-1.05114
299	xbz_14128	11970.3	5939.71	-1.04888
300	xbz_14130	3523.55	1652.15	-1.04883
301	xbz_7110	1108.68	519.317	-1.04796
302	he_47519	12673.6	6187.31	-1.03445
303	he_4609	5164.5	10451.5	1.01701
304	he_21561	27037.4	57841.4	1.01024
305	he_26755	244.953	121.609	-1.00715
306	he_13939	596.925	297.664	-1.00386
307	he_9772	1101.91	2204.35	1.00032
308	xbz_4638	203.354	103.038	-0.996733
309	xbz_22723	4710.78	9389.17	0.99503
310	he_17477	1437.86	752.623	-0.993485
311	he_2186	7591.44	3857.07	-0.976869
312	he_23346	332.278	178.304	-0.971189
313	he_47515	4577.96	2338.68	-0.969013
314	xbz_8207	256.289	138.6	-0.966902
315	xbz_14050	193.266	99.1197	-0.966089
316	he_42549	500.924	265.779	-0.954918
317	he_53549	228.847	118.327	-0.950034
318	xbz_8189	485.478	251.875	-0.947309
319	xbz_14154	463.051	919.901	0.942755
320	he_15398	260.974	140.731	-0.941162
321	he_43853	17446.5	9109.96	-0.937422
322	he_9047	719.247	1356.04	0.922876
323	he_5138	1176.19	626.204	-0.921548
324	xbz_21085	9262.07	5020.24	-0.903373
325	xbz_2177	509.411	277.012	-0.90135
326	he_38577	461.304	819.588	0.900576
327	xbz_4929	358.942	645.609	0.879621
328	TU600	1683.97	929.839	-0.871136
329	he_37854	12726.7	7093.44	-0.866873
330	xbz_19	34453	19154.4	-0.856508
331	he_35306	324.11	147.681	-0.852663
332	he_9058	255.819	454.112	0.845392
333	he_51344	2420.53	1405.21	-0.845186
334	he_15370	588.376	372.234	-0.843747
335	he_37052	657.227	348.177	-0.843379
336	he_14423	1285.58	744.867	-0.843253
337	he_6836	4381.84	2451.69	-0.837814
338	he_38407	8674.62	4982.01	-0.834236
339	xbz_29172	1895.38	1063.4	-0.833798
340	xbz_11369	311.596	553.363	0.807399
341	xbz_3731	4857.12	2874.9	-0.806421
342	he_25669	293.806	173.683	-0.80441
343	xbz_9572	694.442	398.369	-0.801748
344	he_28713	459.407	271.858	-0.801019
345	xbz_3737	4729.74	2727.58	-0.79414
346	he_52022	259.592	449.327	0.791862
347	he_15653	13817.7	25256.7	0.791496
348	xbz_28242	2431.8	1379.2	-0.782034
349	xbz_20363	664.93	362.366	-0.78049
350	xbz_6201	413.83	241.989	-0.780081
351	he_29970	1460.47	852.656	-0.776414
352	he_51418	4861.63	2869.97	-0.760406
353	he_49836	4315.23	2598.29	-0.753506
354	he_25081	13162.7	22171.6	0.752256
355	he_15651	16892.5	30083.2	0.749885
356	xbz_8338	15782.4	26507.2	0.74807
357	xbz_17454	16057.2	25470.1	0.747761
358	he_38575	13312.3	7614.22	-0.747535
359	xbz_16514	1556.35	892.726	-0.742994
360	xbz_27398	4041.39	2381.55	-0.739511
361	xbz_8050	16518.5	27826.1	0.73793
362	he_48076	2792.52	1674.7	-0.73767
363	he_38583	2328.44	3863.48	0.730538
364	he_31641	16755.6	27914.9	0.727897
365	xbz_26095	7736.66	4734.94	-0.72681
366	xbz_29215	14663.5	22969.1	0.720928
367	xbz_26373	2773.55	1678.84	-0.717215
368	he_15142	15264	25877.5	0.716022
369	he_53109	3956.9	2365.89	-0.715841
370	xbz_7667	1309.24	742.05	-0.708076
371	he_53133	15333.6	25190.5	0.707361
372	he_47498	10726.2	6475	-0.705051
373	xbz_13754	13620.9	22184.8	0.703744
374	he_47551	13002.3	21284.5	0.701481
375	he_25753	1006.21	621.882	-0.697733
376	he_8779	17608.3	10621.8	-0.69604
377	he_40709	7939.34	4785.65	-0.688384
378	xbz_13756	16015.3	25762.6	0.685827
379	he_33594	932.986	593.148	-0.671487
380	xbz_13753	17701.9	28626.4	0.670957
381	xbz_8337	18147.8	28814.4	0.666993
382	xbz_11316	14686.9	9278.55	-0.657524
383	he_21649	7381.55	11666.4	0.657234
384	he_6831	4259.47	2714.5	-0.649987
385	he_25080	17579.6	28040	0.645165
386	xbz_29013	15206.8	23745.1	0.642916
387	he_5226	348.738	224.502	-0.635414
388	he_6041	32759.2	23485.8	-0.630705
389	xbz_18521	935.063	583.47	-0.626522
390	xbz_27054	7318.32	11271	0.624497
391	he_25083	16066.6	25198.7	0.61952
392	he_44575	1992.77	3000.47	0.615756
393	xbz_11720	7973.41	12401.4	0.61508
394	he_9634	16062.9	23850.9	0.611379
395	he_30905	9704.72	6360.72	-0.609497
396	he_47479	5867.98	3667.28	-0.605337
397	he_4037	15932.8	10503.5	-0.601127
398	he_14017	45185.1	30462.1	-0.591463
399	he_17857	571.71	384.623	-0.575757
400	he_27671	443.785	654.955	0.571475
401	xbz_22825	1977.29	1334.15	-0.567601
402	xbz_23504	4496.19	3002.98	-0.557814
403	xbz_29174	1666.31	1146.1	-0.553374
404	he_35750	10892.9	15862.7	0.542256
405	he_18278	43673	30037.4	-0.539978
406	he_5651	8769.14	14003.4	0.538945
407	he_20919	12909.2	8804.22	-0.535971
408	he_52854	13752.4	9621.92	-0.530679
409	he_12204	11333.1	15997.2	0.520932
410	xbz_6475	9838.74	14079.5	0.51705
411	he_47505	11984.6	8132.86	-0.512104
412	he_25103	8235.35	5681.96	-0.511113
413	he_53230	2561.2	1800.87	-0.50813
414	xbz_24446	2175.2	3089.79	0.506358
415	he_53034	1596.04	1036.98	-0.506104
416	he_41735	1985	1284.45	-0.505725
417	he_36910	33632.7	24484.7	-0.501724
418	he_42966	4580.51	3170.86	-0.482577
419	xbz_29278	3005.18	1968.14	-0.465014
420	he_26540	37731.3	27365.7	-0.463391
421	xbz_25897	18042.5	13032.4	-0.462383
422	he_26246	35778.7	26135.8	-0.458907
423	he_2914	7691.92	10526.2	0.452571
424	xbz_13765	8039.77	5876.17	-0.452277
425	he_47213	17918.5	12642.4	-0.446536
426	xbz_28240	7197.61	5343.42	-0.429756
427	he_30884	11384.1	8585.63	-0.421745
428	xbz_16233	21650.9	16202.3	-0.418226
429	xbz_14049	21408.2	16033.8	-0.417046
430	he_35606	11685.1	15520.7	0.409521
431	he_51342	8380.49	6367.85	-0.405295
432	he_7043	9721.99	7367.83	-0.400011
433	he_30695	31500.5	43759.9	0.389217
434	he_29304	8423.03	6449.6	-0.386862
435	he_2388	3582.12	4675.55	0.384322
436	he_51961	25643.9	20002.6	-0.381078
437	xbz_3182	34507.3	26591.2	-0.377664
438	he_21967	7546.72	9656.41	0.37704
439	he_43348	10965.5	8519.95	-0.364056
440	he_5346	2678.46	3662.54	0.362101
441	xbz_29314	1654.07	1289.11	-0.360699
442	xbz_14675	38593.8	30857.8	-0.355658
443	he_2975	28541.3	38037	0.353088
444	he_4234	4102.27	3208.38	-0.351956
445	he_53589	3764.57	2955.04	-0.349597
446	xbz_8328	808.597	1023.13	0.339858
447	he_19742	38135.6	30281.9	-0.332683
448	he_1493	4846.55	3857.92	-0.330996
449	he_45012	28784.1	36064.3	0.3253
450	xbz_20511	6882.95	5550.29	-0.322354
451	he_48081	1687.11	2106.44	0.31957
452	he_47514	7623.32	9274.03	0.31932
453	he_32726	14546.8	12475.6	-0.317904
454	xbz_5246	29469.9	36658	0.314024
455	he_29521	20448.7	15241.7	-0.306663
456	xbz_998	38204.7	30604.8	-0.293789
457	he_52910	31766.7	26139.8	-0.293142
458	he_18225	37534.6	30670.1	-0.291389
459	xbz_7517	2709.77	2215.02	-0.290915
460	xbz_8644	6285.37	5163.77	-0.288405
461	he_20968	19958.9	24142.2	0.279173
462	he_47554	17837.1	20987.4	0.27487
463	he_31035	33135.4	28528.6	-0.262393
464	he_47874	28586.3	34899.7	0.26007
465	he_35611	10378.8	8674.99	-0.258711
466	he_40138	11867.8	13970.1	0.256992
467	xbz_26127	18672.8	22561.3	0.255076
468	he_28378	30622.6	37594.6	0.254154
469	he_49538	15845	12667	-0.252556
470	xbz_21862	30555	36629	0.250504
471	he_9776	4858.06	5770.72	0.248369
472	he_46823	25848.4	21805.7	-0.245373
473	he_29411	29219.3	37171.5	0.24449
474	he_28866	30324	36874.6	0.234991
475	xbz_27642	6379.15	5424.97	-0.233819
476	he_1991	32459.1	27636.6	-0.232043
477	he_25668	17199.2	19796.4	0.23169
478	he_52106	5285.85	4504.07	-0.23139
479	xbz_29532	4075.28	3472.95	-0.230693
480	he_38409	17280.6	20497.6	0.230381
481	he_8776	42696.4	36410.8	-0.229749
482	he_9646	29646.3	33568.5	0.226586
483	xbz_15625	28359.6	24263.1	-0.225297
484	he_40719	33945.2	39539.4	0.223181
485	he_13555	16332.7	19009.6	0.21896
486	he_28451	28569.2	24556.9	-0.217732
487	he_53189	35314.1	41014.4	0.208984
488	he_40343	34658.9	40618.2	0.205835
489	he_25099	14435.9	16646.7	0.204537
490	xbz_5579	25392.3	22242.1	-0.19451
491	he_50323	6740.3	5917.88	-0.1903
492	he_10363	27022.1	24908.4	-0.18985
493	xbz_7200	16265.7	18546	0.183884
494	he_15724	38816.2	44439.1	0.180642
495	he_40110	14781.7	13176.1	-0.165892
496	he_47558	23574.7	26029.5	0.163484
497	he_27706	18917.7	16890.7	-0.163143
498	he_43686	22755	25139.3	0.160406
499	xbz_17038	23277.7	26072.5	0.157362
500	he_47544	22816.6	24930.8	0.15507
501	xbz_12781	17908.8	16124.7	-0.15092
502	he_30317	18428.7	16999.6	-0.150721
503	he_30831	20984.5	24310.7	0.150095
504	he_8778	41747.8	37646	-0.14925
505	xbz_23915	22650.5	25017	0.144525
506	he_52927	31167	28218.2	-0.138578
507	xbz_26118	23781.6	25474.1	0.119374
508	he_32394	9123.42	9911.02	0.119313
509	he_9068	8425.92	9132.31	0.11657
510	he_47546	20522.4	22207.5	0.113832
511	he_29126	18795.5	20193.6	0.102404
512	xbz_26125	20880.2	19563.8	-0.0957972
513	he_45766	23093.1	24611.6	0.0923113
514	he_23428	14733	15648.4	0.0872745
515	he_47085	27336.2	25779.2	-0.0843315

## Sheet: 检测信号值
No.	探针_ID	Sample A 平均信号值	Sample B 平均信号值
1	chr10_C_2
2	chr10_D_4
3	chr11_A_6
4	chr11_A_7
5	chr12_D_5
6	chr13_D_6
7	chr18_B_3
8	chr2_B_2
9	chr2_D_1
10	chr20_B_4
11	chr6_A_4
12	chr8_B_5
13	chr9_B_6
14	he_10021
15	he_10106		27.9826
16	he_1011	665.849	1875.18
17	he_1012	3541.29	1373.11
18	he_10229	2537.73	847.994
19	he_10363	27446.6	24341.4
20	he_10364
21	he_10527	13770.8	5556.59
22	he_10552		600.913
23	he_10636	18.9723	14.5113
24	he_11072	27.5321	23.3117
25	he_11181	3278.2	10201
26	he_11413	18.7393	251.657
27	he_11415	25.6895	305.427
28	he_11517	16.6082	16.5325
29	he_11553	74.8175	60.166
30	he_11555	423.579	287.274
31	he_11662
32	he_11733
33	he_11751	35.7178
34	he_11793	3540.45	11582.9
35	he_12051	18.9376
36	he_12052	17.1464	14.8892
37	he_12202	1418.64	446.563
38	he_12203
39	he_12204	11293.5	16427.5
40	he_12335
41	he_12443		10.5688
42	he_12546
43	he_12588		49.4499
44	he_12763
45	he_1289		13.2268
46	he_129	21.7804	118.133
47	he_13009
48	he_13117		15.0217
49	he_13183	349.74	296.331
50	he_13388	1144.01	537.81
51	he_13555	16054.7	18961.6
52	he_13758	22727.4	21767.2
53	he_138	20.8492
54	he_13856	9456.67	2281.71
55	he_13939	606.85	303.772
56	he_13993
57	he_14017	45496.2	30485.5
58	he_14115	2544.93	2271.97
59	he_14144
60	he_14371		20.3653
61	he_14382	28.0119	52.8806
62	he_14386	76.7337	5870.78
63	he_14393	21.5717	996.945
64	he_14400
65	he_14422	19.5777
66	he_14423	1309.25	731.344
67	he_14700
68	he_1492	1303.3	17452.3
69	he_1493	4897.77	3870.59
70	he_15138	21.5089	50.0536
71	he_15140	2407.88	873.971
72	he_15142	15457.4	25658.2
73	he_15155
74	he_15187
75	he_15199		11.5689
76	he_15200
77	he_15201	15.4628	32.4986
78	he_15370	638.972	356.295
79	he_15397	91.8347	39.0478
80	he_15398	263.955	140.515
81	he_15588	5159.05	710.714
82	he_15616
83	he_15624	787.909	881.863
84	he_15651	17110.3	29008.6
85	he_15653	14063.7	24719.2
86	he_15724	39143.7	44687.5
87	he_1586	6659.11	2993.08
88	he_15944
89	he_15980
90	he_16205
91	he_16206		14.0277
92	he_16289	13.7858
93	he_16347		59.5569
94	he_16349	33.2266	2196.65
95	he_1662
96	he_16687		9.90806
97	he_16726	16892.3	14771.6
98	he_16732
99	he_16755	1924.64	551.95
100	he_16903
101	he_17153	8640.37	9057.11
102	he_17154	36.4754	12.9956
103	he_17193
104	he_17291	3185.14	457.297
105	he_17301
106	he_17407	41.9321	1640.69
107	he_17423
108	he_17441	82.0779	4554.51
109	he_17443
110	he_17477	1465.24	745.283
111	he_17478	239.543	88.7825
112	he_17857	563.276	372.885
113	he_17916
114	he_18076	31.6758	49.6621
115	he_18129	32.4166	83.3645
116	he_18225	37911.6	30379
117	he_18278	44061.1	29990.4
118	he_18321
119	he_18422
120	he_18466
121	he_18518
122	he_18545		10.6446
123	he_18658
124	he_18859
125	he_18955	59.8604	67.5236
126	he_19075	19.8393	18.2372
127	he_1916
128	he_19342
129	he_19454	2044.36	11476.5
130	he_19455	776.334	3703.69
131	he_197	492.676	83.6145
132	he_19742	38535.3	29961.5
133	he_19849
134	he_19909
135	he_1991	33426.5	28296.6
136	he_19925
137	he_19980
138	he_20008	14439.1	13732.7
139	he_20127		12.3888
140	he_20131	17.58	48.0174
141	he_20151	31982.1	28879.3
142	he_20180	1124.05	196.893
143	he_20181	244.488	82.7014
144	he_20265	18.3193	18.7412
145	he_20271	223.46	709.667
146	he_2031	8647.51	1936.92
147	he_20337
148	he_20374		16.4778
149	he_20375
150	he_20416	235.277	1201.18
151	he_20459
152	he_2066	345.001	19.0997
153	he_20697	64.3621	28.3637
154	he_20870	108.66	27.1151
155	he_20896	5476.9	2386.77
156	he_20910
157	he_20915	3525.35	697.491
158	he_20919	13237.3	8769.15
159	he_20922
160	he_20936	2887.63	1180.53
161	he_20939	10860.8	5182.27
162	he_20942
163	he_20968	20576.1	23729
164	he_21018	442.079	1948.82
165	he_21059		852.471
166	he_21097
167	he_21132	18.5319	15.2982
168	he_21320
169	he_21337
170	he_21527
171	he_21561	27740.9	58459.2
172	he_21566	7527.92	1720.49
173	he_21594	195.655	7407.95
174	he_21649	7500.68	11727
175	he_2174	4662.77	830.092
176	he_2186	7778.29	3823.11
177	he_21871		574.617
178	he_21872		374.27
179	he_21873	31.713	3886.45
180	he_21878	298.411	1026.54
181	he_21880	40.6697	218.24
182	he_21967	7698.43	9657.23
183	he_21987
184	he_22155
185	he_22366
186	he_22404		207.47
187	he_22493		24.7225
188	he_22545
189	he_22725	6836.7	22350.7
190	he_22736
191	he_22761
192	he_22762
193	he_22798
194	he_22897
195	he_23031		17.9429
196	he_23198
197	he_23268
198	he_23269
199	he_23346	352.441	180.651
200	he_23347	1616.7	1820.7
201	he_23413	4687.06	667.687
202	he_23414
203	he_23428	15777.8	16109.6
204	he_23458	200.874	318.524
205	he_2348	6101.74	950.939
206	he_23737	1378.32	307.997
207	he_23832
208	he_2388	3602.43	4635.19
209	he_23954	30.6645	30.9957
210	he_23994	17.2274
211	he_24	17.002	12.3138
212	he_24113	100.883	59.1816
213	he_24277		36.6533
214	he_24403	1609.58	553.14
215	he_24664
216	he_24677	113.155	52.5005
217	he_24706		15.6661
218	he_24730	120.5	468.919
219	he_24741		19.4084
220	he_24757
221	he_24920
222	he_24979	1135.85	6737.36
223	he_2498
224	he_24981	1592.2	4175.5
225	he_25
226	he_2502
227	he_25080	17649.6	27714.8
228	he_25081	13302.9	22069.5
229	he_25082
230	he_25083	16135.5	25101.9
231	he_25084	687.021	184.659
232	he_25098	64.5814	21.109
233	he_25099	15437.4	17255.2
234	he_25100	24.6223	13.8557
235	he_25101	7296.89	3475.08
236	he_25103	8135.34	5808.55
237	he_25327
238	he_25328	24.0878	18.9844
239	he_25375	14881.6	12734.3
240	he_25408	62.0373	20.9757
241	he_25409	778.378	653.916
242	he_25497
243	he_25586		500.964
244	he_25588		359.461
245	he_25626
246	he_25668	17377.1	19752.1
247	he_25669	325.745	178.953
248	he_25673	563.356	544.958
249	he_25674	464.003	80.1874
250	he_25676	139.451	143.291
251	he_25688	155.157	60.2892
252	he_25690	17925.7	20352.7
253	he_25693
254	he_25699	6544.78	2879.93
255	he_25704	61.4753	165.081
256	he_25712	2441.18	90.1276
257	he_25728	10212.1	789.661
258	he_25733	191.299	41.5996
259	he_25747	12342.5	4250.64
260	he_25748	3145.21	1280.02
261	he_25753	1045.34	646.132
262	he_25776	9544.44	1612.39
263	he_25777	452.67	370.467
264	he_25788
265	he_25933
266	he_26079		17.6482
267	he_26080
268	he_26104	1160.86	224.657
269	he_26137	4614.43	1100.84
270	he_26153	15.5036	11.5946
271	he_26246	35423.3	26642
272	he_26249		15.2868
273	he_26307	8727.3	18446.2
274	he_26314	31.1435	22.7543
275	he_26344
276	he_26418
277	he_26540	37283.7	26720.8
278	he_26559	25.0245	23.164
279	he_26584
280	he_26695
281	he_26755	234.876	123.141
282	he_26836
283	he_27079	18.9685	78.3179
284	he_27160
285	he_27208
286	he_27218	6357.51	804.99
287	he_27228	27.0341
288	he_27299
289	he_27500
290	he_27523	70.1717	23.765
291	he_27671	451.317	640.616
292	he_27706	19011.5	17292.3
293	he_27778
294	he_27781
295	he_27797
296	he_27831	23.6176	24.1872
297	he_27875	211.569	621.874
298	he_27876	1269.25	6075.93
299	he_28251
300	he_28329	29.1813	20.2712
301	he_28378	30546.7	36532.3
302	he_28411
303	he_28451	27458.2	23665.4
304	he_28473	71.0343	27224
305	he_28474	198.551	39428.5
306	he_28476	67.8424	12998.9
307	he_28479	18.1914	68.6837
308	he_28480	173.223	12046.7
309	he_28482	162.988	20469.9
310	he_28483	18.3345	421.228
311	he_28710
312	he_28711	885.056	711.848
313	he_28712		13.2899
314	he_28713	471.645	274.634
315	he_28825	296.853	84.7063
316	he_28827	34.7079	34.2281
317	he_28866	30456.7	35905.2
318	he_28947	16.8476
319	he_28948
320	he_28961	9693.7	2407.07
321	he_28969	4896.53	630.066
322	he_29126	19510.2	20568.4
323	he_2914	7894.69	10450.9
324	he_29243
325	he_29253	17.7177
326	he_29304	8395.42	6315.84
327	he_2937	34.3555	1431.67
328	he_29411	29421.9	35704.6
329	he_29521	20067.7	15489.4
330	he_29580
331	he_29648	8711.99	1381.19
332	he_29697
333	he_2975	29384.2	38102.7
334	he_29755
335	he_29964	9019.72	2058.2
336	he_29970	1475.25	900.438
337	he_29981
338	he_30037
339	he_30086	23.5116	24.2302
340	he_30153	725.446	3537.8
341	he_30154
342	he_30220	59.9954	62.0746
343	he_30315
344	he_30317	18642	16610.2
345	he_30405	251.848	781.421
346	he_30566	9039.23	1492.78
347	he_30693
348	he_30695	31893.4	42541
349	he_30831	21269.6	23749.6
350	he_30882
351	he_30884	11575.1	8538.08
352	he_30889	10449.2	10136.5
353	he_30905	9828.81	6389.1
354	he_31014	1741.71	2027.64
355	he_31018	189.715	4383.97
356	he_31019		58.2776
357	he_31029	45.6825	7933.98
358	he_31030	185.296	29009.5
359	he_31031	89.5214	7893.39
360	he_31032	169.017	23393.5
361	he_31033		680.8
362	he_31035	33786.9	28187.2
363	he_31077	68.6759	31.8957
364	he_31201
365	he_31220	21.2465
366	he_31221	198.725	70.6863
367	he_31262
368	he_31383		640.44
369	he_31400
370	he_3159
371	he_3161		14.2591
372	he_31641	16669.3	27164.9
373	he_31698	74.417	109.391
374	he_31902
375	he_31915
376	he_31933
377	he_32	741.535	2442.2
378	he_32093
379	he_32353	44.019	1560.15
380	he_32394	8984.52	9691.11
381	he_32438
382	he_32556
383	he_32697
384	he_32726	14899.6	12123.2
385	he_32856
386	he_33102
387	he_33125	831.789	245.555
388	he_33216	2178.54	2340.15
389	he_33220	984.595	3613.3
390	he_33255
391	he_3332	75.6987	43.5517
392	he_33419
393	he_33463
394	he_33536
395	he_33591
396	he_33592	9402.42	9756.63
397	he_33594	963.676	597.076
398	he_33647	8768.67	2311.37
399	he_33649	3089.22	573.693
400	he_33719
401	he_34022
402	he_3417
403	he_34254	2759.48	948.794
404	he_34409
405	he_34434
406	he_3446
407	he_34693
408	he_34734		64.5031
409	he_35105	28.0051	40.2203
410	he_35149
411	he_35178	4600.54	868.232
412	he_35232	790.896	4486.15
413	he_35260
414	he_35265
415	he_35269		645.461
416	he_35306	305.721	154.167
417	he_35417
418	he_35559	1787.55	5021.05
419	he_35606	11663.4	16124.6
420	he_35611	10113.5	8269.26
421	he_35693	306.664	57.8646
422	he_35750	11135.7	15774.8
423	he_360		161.285
424	he_36376	625.258	193.741
425	he_36377	21.1283
426	he_36383	467.935	185.93
427	he_36384
428	he_365	148.67	1813.61
429	he_36506	484.227	230.536
430	he_36507
431	he_36542	106.04	137.289
432	he_36543	1310.04	151.955
433	he_36553	26.4161	349.946
434	he_36556	1416.12	542.45
435	he_36560
436	he_36597	230.121	966.47
437	he_36616	23642.8	24392.3
438	he_36635
439	he_36649		111.249
440	he_36661	320.42	282.342
441	he_36697	78.0029	70.6631
442	he_36724
443	he_36788	813.379	6493.27
444	he_36832	8269.1	3923.66
445	he_36840		20.4699
446	he_36910	34254.7	24836.2
447	he_36935		19.0562
448	he_3702	32.2368	175.066
449	he_37052	657.81	350.641
450	he_37061
451	he_37062	731.315	221.954
452	he_3720		51.6076
453	he_37317	22915.4	17925.1
454	he_37337	4116.01	1959.32
455	he_37488		22.3385
456	he_37705
457	he_37784
458	he_37851	6440.37	1282.53
459	he_37854	12809	7085.09
460	he_37871	4612.9	766.305
461	he_37889	20.5252	1659.98
462	he_37892		622.908
463	he_37964
464	he_38045
465	he_38204		458.512
466	he_38247	9360.54	4310.22
467	he_383	19.8231	96.0976
468	he_38328	17.385	34.9261
469	he_38407	8635.49	4793.74
470	he_38408	60.5106	12.1566
471	he_38409	17236.2	20251.9
472	he_38410	234.497	65.5216
473	he_38547
474	he_38575	13201.2	7755.94
475	he_38577	444.731	815.576
476	he_38583	2370.56	3942.23
477	he_38587	9970.09	32589.1
478	he_38706
479	he_38779	213.683	62.1077
480	he_38783	50.076	66.5038
481	he_38877
482	he_38881	19.6125
483	he_38904	17418.6	7791.12
484	he_39032		26.5417
485	he_39049	14.9376	21.1226
486	he_39085
487	he_3909
488	he_39224	65.9098	71.6736
489	he_39302	28791.3	28873
490	he_39410
491	he_39456	5506.49	2686.98
492	he_39482
493	he_39499		80.0754
494	he_39736	5207.95	498.073
495	he_39883	30453.3	31522.3
496	he_4000
497	he_40110	14802.9	13126
498	he_40138	11851	13791.2
499	he_40142	5645.59	50691.8
500	he_40162	9589.41	26715.7
501	he_40174	583.499	2627.58
502	he_40343	34768.8	39896.9
503	he_4037	16335.7	10638.4
504	he_40557
505	he_4064	2384.89	6194.83
506	he_40709	7708.21	4788.25
507	he_40719	33962	39168.8
508	he_40784
509	he_40953	2813.33	12515.3
510	he_40976	36.1247	463.348
511	he_41025
512	he_41210	7277.79	1147.41
513	he_41230
514	he_41259	7519.6	1690.33
515	he_41264	24.186	142.353
516	he_41333	3063.93	13490.4
517	he_41343	33.5725	39.3241
518	he_41344	33.1473	307.334
519	he_41514	18.6981	31.1364
520	he_41519	18.5776	34.0097
521	he_41735	1928.61	1294.51
522	he_4179
523	he_41842
524	he_41925
525	he_41985
526	he_4201	232.35	160.335
527	he_42040	29.2813	56.5185
528	he_42138
529	he_42176	143.747	220.015
530	he_42208
531	he_42309	27.0223	66.0271
532	he_42311	29.209	408.127
533	he_42318	27.1019	658.173
534	he_42327	16.564
535	he_4234	3930.09	3224.85
536	he_42549	489.47	257.555
537	he_42703		12.1361
538	he_42966	4513.93	3126.86
539	he_43060	5287.4	4409.13
540	he_43348	10941.3	8660.88
541	he_43505
542	he_43686	22417.6	24968.6
543	he_43839
544	he_43853	17251.6	9126.46
545	he_43858
546	he_43902
547	he_44031
548	he_44348
549	he_44379	1382.73	215.284
550	he_444	10079	25085.3
551	he_44491
552	he_44575	1941.16	2920.35
553	he_44769
554	he_44774	14.8385
555	he_44807	1378.86	6642.81
556	he_4491	549.985	508.385
557	he_44968	26.8217	86.3598
558	he_45012	28713.5	35653.9
559	he_45339
560	he_45492
561	he_45540
562	he_45766	23156.8	24413.3
563	he_4580
564	he_45964	17.4426	25.8263
565	he_46026
566	he_46034	6228.68	1094.77
567	he_46082	183.176	44.6209
568	he_4609	5053.51	10470.5
569	he_46242	15848.1	2394.41
570	he_46244
571	he_4625		78.2522
572	he_46260
573	he_46408	7137.37	1280.09
574	he_46690	22.6946	19.6502
575	he_46744	115.814	6990.1
576	he_46823	26002	21629.3
577	he_46887	90.1674	70.0557
578	he_47036	489.207	326.065
579	he_47085	26787.7	25567.6
580	he_47198
581	he_47213	17849.6	12793.4
582	he_4723	2656.91	7830.31
583	he_47473	27.5342	43.5227
584	he_47479	5794.84	3626.16
585	he_47496	9794.97	3214.44
586	he_47498	10846.3	6400.12
587	he_47500
588	he_47505	12004.8	8254.91
589	he_47509		14.0687
590	he_47514	7658.95	9206.79
591	he_47515	4576.02	2377.39
592	he_47519	12698.4	6037.99
593	he_47535	105.606	24.4409
594	he_47544	22736.4	24757
595	he_47546	21145.5	22188.2
596	he_47550	18489	17623.9
597	he_47551	13035.8	20847.2
598	he_47552	19481	18114.2
599	he_47554	17615.7	20808.3
600	he_47558	23336.2	25501.6
601	he_47874	28698.8	34051.9
602	he_48015	1517.34	723.685
603	he_48071	22.2855	22.2358
604	he_48075	773.536	332.265
605	he_48076	2874.73	1693.58
606	he_48081	1766.3	2090.23
607	he_48162
608	he_4830	32.1254	50.9672
609	he_48324
610	he_48741
611	he_48746
612	he_48827		22.1199
613	he_48829	38.2921	27.1916
614	he_48830	75.6614	53.8636
615	he_48880	32.4932	24.3717
616	he_48881	20.1536	25.1741
617	he_4902	51.2469	27.5386
618	he_49215
619	he_4926
620	he_4927	15.8114
621	he_4928
622	he_49310
623	he_49313
624	he_49538	15758.3	12882.3
625	he_49591	20.2855	32.8798
626	he_49593	22.118
627	he_49594	798.8	270.258
628	he_49595	152.769	69.2036
629	he_49596	900.144	368.228
630	he_4967	5541.37	1097.67
631	he_49808	4049.04	4332.77
632	he_49811	23.8942	18.7032
633	he_49813	2193.35	2091.24
634	he_49836	4280.12	2548.27
635	he_49837
636	he_49840	247.403	44.7267
637	he_5002		13.5471
638	he_50065	5262.27	1574.72
639	he_50188		12.736
640	he_50197
641	he_50222
642	he_50323	6416.84	5841.01
643	he_50521	8479.15	1848.65
644	he_50564
645	he_5069	195.581	1157.53
646	he_50707	5379.41	13722.7
647	he_50723	2279.25	177.665
648	he_50815	8381.97	1796.59
649	he_51088		300.961
650	he_51253
651	he_5126	17246.8	39972.7
652	he_51341	31.2146	19.357
653	he_51342	8308.98	6325.32
654	he_51344	2359.66	1349.24
655	he_51356	1684.58	5834.63
656	he_5138	1148.82	676.93
657	he_51417	770.238	332.317
658	he_51418	4861.53	2867.55
659	he_51658
660	he_51754
661	he_51788	26.7871	518.51
662	he_51829	21.7189	21.6617
663	he_51830	31.8573	209.556
664	he_51888	6324.71	1377.11
665	he_51914
666	he_51961	26122.5	19604.1
667	he_51982	119.962	37.936
668	he_51983	194.245	154.823
669	he_52010	245.139	179.045
670	he_52022	270.048	427.464
671	he_52065	21.9675	182.077
672	he_52106	5232.87	4651.67
673	he_5221	18.9068	26.1624
674	he_52217		13.1312
675	he_52218
676	he_52245	8624.85	2021.87
677	he_5226	380.028	225.839
678	he_52487	20.5984
679	he_52673	35.5327	319.212
680	he_52701	2178.19	970.071
681	he_52722	945.172	182.287
682	he_52733	122.777	139.122
683	he_52751
684	he_52821	21.2238	15.0459
685	he_52822	28.7509	16.7299
686	he_52827	26.0239	42.0194
687	he_52854	14030.2	9389.39
688	he_52875
689	he_52908		38.0292
690	he_52910	32586.3	25892.4
691	he_52927	30688.5	28111.7
692	he_52967
693	he_53032	757.777	559.992
694	he_53033	31.9497	18.7773
695	he_53034	1565.22	1090.89
696	he_53035	15.9866
697	he_531	930.728	434.145
698	he_53109	3848.65	2304.59
699	he_53133	15254.5	24545.4
700	he_53164
701	he_53189	36423.5	41084.6
702	he_532	228.707	77.756
703	he_53228	80.756	63.46
704	he_53229
705	he_53230	2547.56	1791.79
706	he_53232
707	he_53233	162.556	28.9083
708	he_53286	34.0744	16.6241
709	he_53287	1280.35	1145.75
710	he_53370
711	he_53444
712	he_5346	2634.44	3584.55
713	he_53507
714	he_53509
715	he_53513	139.82	126.081
716	he_53515	219.054	60.0473
717	he_53516	68.9179	29.5391
718	he_53548	249.458	87.546
719	he_53549	215.066	117.986
720	he_53589	3769.47	3093.48
721	he_53591	374.448	184.448
722	he_540		166.769
723	he_5403	15.4763	16.4562
724	he_5625
725	he_5626	229.787	101.611
726	he_5651	8859.35	13656.3
727	he_5721
728	he_5727	7097.97	7002
729	he_5849
730	he_593	68.2279	9658.73
731	he_596		614.889
732	he_597
733	he_598		431.771
734	he_6004
735	he_6014
736	he_6015	48.6366	51.5166
737	he_6041	33543.5	22795.8
738	he_6383
739	he_6498		17.8862
740	he_6625
741	he_6656
742	he_6808
743	he_6831	4331.09	2696.87
744	he_6832		18.8024
745	he_6833	150.538	56.6611
746	he_6834	34.128	19.4012
747	he_6835	324.464	116.501
748	he_6836	4429	2498.02
749	he_6837
750	he_6841	43.1649
751	he_6842	9271.64	9113.58
752	he_7005
753	he_7041	36820.9	36277
754	he_7043	9652.16	7572.85
755	he_7044
756	he_7061
757	he_7169
758	he_7253	2217.5	785.091
759	he_7363	3941.13	496.941
760	he_753
761	he_7624
762	he_7788
763	he_7822	19.0827	17.5203
764	he_810		86.6238
765	he_8109	44.2662	44.1855
766	he_8209	173.325	34.8673
767	he_8384		11.1718
768	he_8487
769	he_8520	20141	19585.8
770	he_8535	185.008	100.639
771	he_8569	233.322	163.436
772	he_8749
773	he_8774	567.65	445.982
774	he_8776	42493	37175.8
775	he_8778	41310	38392.8
776	he_8779	17541.1	10652.9
777	he_8797		12.9899
778	he_8861	196.422	90.711
779	he_8862	434.809	352.786
780	he_9036		14.3919
781	he_9047	727.113	1344.61
782	he_9049	16529.8	38085.5
783	he_9053	405.287	421.471
784	he_9058	261.527	444.852
785	he_9059	610.469	1590.02
786	he_9068	8878.02	9511.26
787	he_9090	228.629	1246.85
788	he_9307	219.32	82.9568
789	he_9463	144.249	16252.3
790	he_9626		38.9814
791	he_9627	25.3324	196.863
792	he_9634	16028.6	23771.1
793	he_9637	44.4876
794	he_9638	93.1719	20.1298
795	he_9646	29624.6	33795.6
796	he_9720	24.6127	3385.97
797	he_9721	48.5697	8037.42
798	he_9772	1098.01	2182.39
799	he_9775	2530.73	704.293
800	he_9776	4846.69	5738.55
801	he_981	29.3856	5734.13
802	he_983		19.2459
803	he_9859	3524.07	3808.4
804	he_9860	646.998	206.733
805	he_9882	9347.73	2226.78
806	he_9903	190.051	192.185
807	he_9904	16.7682	26.5374
808	rt_chr1_A_1
809	rt_chr1_A_1_host
810	rt_chr1_C_1		40.3561
811	rt_chr1_C_1_host
812	rt_chr1_G_1
813	rt_chr13_E_2
814	rt_chr13_E_2_host
815	rt_chr16_B_7
816	rt_chr2_B_1
817	rt_chr2_D_2
818	rt_chr2_D_3	20.6645
819	rt_chr3_A_2
820	rt_chr3_E_1
821	rt_chr4_A_3
822	rt_chr6_A_5
823	rt_chr9_F_1
824	TU1
825	TU100,TU232	124.98	88.2661
826	TU105
827	TU107
828	TU108
829	TU119
830	TU12
831	TU126_1
832	TU139
833	TU145
834	TU16
835	TU160
836	TU161
837	TU184
838	TU194		62.5016
839	TU195
840	TU20
841	TU206	39.9175	32.4751
842	TU208
843	TU219
844	TU22
845	TU230
846	TU231
847	TU235
848	TU239
849	TU24
850	TU241
851	TU242
852	TU244
853	TU254
854	TU258
855	TU260		21.2497
856	TU261
857	TU263		41.3884
858	TU283
859	TU285	1675.29	5111.04
860	TU303
861	TU308		18.201
862	TU311
863	TU313
864	TU315	1141.05	1016.11
865	TU319
866	TU327	1084.46	2383.04
867	TU357
868	TU368
869	TU371
870	TU384
871	TU386
872	TU387
873	TU398	20.5728	178.714
874	TU399
875	TU4
876	TU416	42.1595	299.971
877	TU421
878	TU43		16.5208
879	TU431
880	TU433		16.4053
881	TU442
882	TU448		72.9889
883	TU452	156.535	1142.29
884	TU465
885	TU471
886	TU481
887	TU498
888	TU499
889	TU500
890	TU513
891	TU531
892	TU540
893	TU541
894	TU556
895	TU558
896	TU56	1568.62	190.722
897	TU583
898	TU589	22.4174	20.0898
899	TU600	1678.37	942.372
900	TU605
901	TU625
902	TU655
903	TU66
904	TU668
905	TU675
906	TU680
907	TU681
908	TU691
909	TU692
910	TU693
911	TU694
912	TU71
913	TU757	50.3396	21.4903
914	TU777
915	TU778
916	TU779
917	TU780
918	TU782	32.4382	209.917
919	TU788
920	TU79	1382.98	4398.05
921	TU791
922	TU801
923	TU809	13.6408
924	TU819
925	TU821
926	TU828
927	TU830
928	TU831	19.8476	19.9139
929	xbz_1041	179.741	18.8929
930	xbz_10531	19.5483	72.4166
931	xbz_10532	150.329	181.288
932	xbz_10770
933	xbz_10778
934	xbz_10910	63.9164	30.2431
935	xbz_10955
936	xbz_10964	257.735	833.221
937	xbz_11018	431.743	1865.36
938	xbz_11034
939	xbz_11312
940	xbz_11316	14644.8	9229.92
941	xbz_11338
942	xbz_11341
943	xbz_11369	307.7	508.569
944	xbz_11501
945	xbz_11688	505.846	73.7478
946	xbz_11720	8008.1	12302.9
947	xbz_11894	702.897	2016.79
948	xbz_12	21.7024
949	xbz_12156
950	xbz_1241	405.392	55.8201
951	xbz_12421
952	xbz_12440
953	xbz_12465
954	xbz_12548	20212.9	3455.02
955	xbz_12703
956	xbz_12704
957	xbz_12775	9723.22	902.798
958	xbz_12781	17967.9	16497.1
959	xbz_12807
960	xbz_12959	43.6886	23.6215
961	xbz_13260
962	xbz_13594
963	xbz_13679	21.2965	19.1649
964	xbz_13680	1596.77	3488.68
965	xbz_13753	17584.4	28298
966	xbz_13754	13817.7	22408.6
967	xbz_13756	15861.2	25532.6
968	xbz_13757	695.179	170.935
969	xbz_13760	62.6135	18.8198
970	xbz_13761	17324.3	17762.6
971	xbz_13762	74.4313	17.6838
972	xbz_13763	8247.91	3911.27
973	xbz_13765	8033.61	5718.1
974	xbz_13870	14.9282
975	xbz_13871	21.2975
976	xbz_1388
977	xbz_13910	65.1323	20.0664
978	xbz_13911	359.085	349.684
979	xbz_14020
980	xbz_14021	1266	616.527
981	xbz_14049	21702.8	15715.7
982	xbz_14050	178.529	101.83
983	xbz_14070	218.349	179.778
984	xbz_14076	17416.6	17114.4
985	xbz_14109
986	xbz_14113	127.186	39.0291
987	xbz_14128	12067.1	5844.95
988	xbz_14129	10026.5	2372.17
989	xbz_14130	3463.46	1606.32
990	xbz_14154	466.4	891.616
991	xbz_14172
992	xbz_14453	13.9145
993	xbz_14505
994	xbz_14512	34.735	27.2743
995	xbz_14635
996	xbz_14675	38420.1	30078.8
997	xbz_14983	13272.4	55064.6
998	xbz_15144	37.4693	14.0305
999	xbz_15227	848.036	2152.85
1000	xbz_15625	27885.5	24337.8
1001	xbz_15773
1002	xbz_15774
1003	xbz_15821	241.372	67.0651
1004	xbz_15823	34.2039	37.404
1005	xbz_15847	31779.2	35982.3
1006	xbz_16208
1007	xbz_16233	21620.1	16316.6
1008	xbz_16439
1009	xbz_16514	1552.05	912.568
1010	xbz_16561
1011	xbz_16594	17.3219
1012	xbz_16624	842.954	4044.39
1013	xbz_16788	206.542	684.696
1014	xbz_16911
1015	xbz_17038	23033.9	25918.9
1016	xbz_17152	71.7926	31.3881
1017	xbz_1728	103.191	50.1447
1018	xbz_17281
1019	xbz_17454	15723.3	25550.8
1020	xbz_1805
1021	xbz_18521	943.489	586.987
1022	xbz_1853
1023	xbz_18744
1024	xbz_19	34202.8	18895.9
1025	xbz_19125	13.8393
1026	xbz_19497	71.3859	47.9203
1027	xbz_19551
1028	xbz_19721	610.405	75.3161
1029	xbz_19786
1030	xbz_20066	609.714	197.683
1031	xbz_20067	25.091
1032	xbz_20069	456.029	201.687
1033	xbz_20070
1034	xbz_20113	20.9316	17.8062
1035	xbz_20200
1036	xbz_20219	97.9104	72.3829
1037	xbz_20363	663.256	377.983
1038	xbz_20369
1039	xbz_20370	667.929	216.887
1040	xbz_20511	6873.07	5439.56
1041	xbz_21085	9296.49	5008.91
1042	xbz_21086	76.9683	10.5173
1043	xbz_21087	17945	18796.5
1044	xbz_21088	200.087	55.8347
1045	xbz_21134	14.1443
1046	xbz_21235
1047	xbz_21267	30.9206	26.2651
1048	xbz_21465	90.8716	66.8521
1049	xbz_2177	507.879	273.321
1050	xbz_21862	30322.4	36062.7
1051	xbz_22723	4973.76	9784.28
1052	xbz_22825	1921.12	1342.29
1053	xbz_2283	185.031	184.829
1054	xbz_23022	40.5588	58.038
1055	xbz_23097	168.036	246.648
1056	xbz_23158		13.5177
1057	xbz_2329
1058	xbz_23504	4494.13	3095.61
1059	xbz_23536	5658.72	4747.99
1060	xbz_23885	21.3263	10.8312
1061	xbz_23915	22257.3	25036
1062	xbz_23920
1063	xbz_24015
1064	xbz_24446	2183.51	3093.06
1065	xbz_24742
1066	xbz_250	1084.64	489.102
1067	xbz_251	163.623	60.4965
1068	xbz_2530
1069	xbz_25639	9205.86	4230.56
1070	xbz_25711	88.6047	77.4816
1071	xbz_258		42.5226
1072	xbz_25884
1073	xbz_25897	17885.9	13110.1
1074	xbz_26076	9951.79	3383.93
1075	xbz_26095	7649.8	4461.62
1076	xbz_26118	23479.8	25561.7
1077	xbz_26123	19982.4	20370.8
1078	xbz_26125	20624.4	19241.6
1079	xbz_26127	18491.4	22190
1080	xbz_26134
1081	xbz_26370	40.9458	28.1567
1082	xbz_26372	683.82	293.714
1083	xbz_26373	2804.44	1690.58
1084	xbz_2650	13642.5	31417.5
1085	xbz_26760
1086	xbz_26816	24.4799	19.9579
1087	xbz_26844	25.4809	26.4042
1088	xbz_26952	679.494	301.882
1089	xbz_27054	7334.74	11724
1090	xbz_27158
1091	xbz_2724	24.1325	11.7342
1092	xbz_27253	53.1916	413.964
1093	xbz_27255	705.593	243.432
1094	xbz_27256	139.256	59.719
1095	xbz_27257	911.39	353.985
1096	xbz_27387	2018.66	2263.03
1097	xbz_27388
1098	xbz_27389	15.2148	16.3161
1099	xbz_27398	3983.1	2408.54
1100	xbz_27399
1101	xbz_27400	178.676	36.6298
1102	xbz_27606
1103	xbz_27642	6398.45	5691.11
1104	xbz_27866	3466.53	8159.04
1105	xbz_28039
1106	xbz_28160
1107	xbz_28239	16.8851
1108	xbz_28240	7262.55	5534.06
1109	xbz_28242	2381.28	1354.69
1110	xbz_28291	733.306	293.741
1111	xbz_28567
1112	xbz_28632	13555.6	44025.8
1113	xbz_28720
1114	xbz_28951	1111.3	213.369
1115	xbz_29013	15228.1	23942.2
1116	xbz_29172	1906.02	1075.24
1117	xbz_29173
1118	xbz_29174	1668.51	1115.48
1119	xbz_29215	14607.2	23996.5
1120	xbz_29276	69.2741	67.1879
1121	xbz_29277
1122	xbz_29278	2883.42	2006.88
1123	xbz_29280
1124	xbz_29281
1125	xbz_29314	1584.53	1295.5
1126	xbz_29476	232.259	185.398
1127	xbz_29477	255.586	61.7995
1128	xbz_29478	51.4832	25.93
1129	xbz_29532	4149.38	3596.45
1130	xbz_29533	639.505	287.744
1131	xbz_2993	269.583	105.384
1132	xbz_3026	6679.79	6771.28
1133	xbz_3163	13.8309
1134	xbz_3169	43.8207	34.9393
1135	xbz_3182	34186.4	26316.2
1136	xbz_3197	15.3583
1137	xbz_3606
1138	xbz_3731	4887.56	2868.38
1139	xbz_3732	13.7574	18.8025
1140	xbz_3733	155.615	52.1613
1141	xbz_3737	4688.69	2685.6
1142	xbz_3738
1143	xbz_3740	64.5987
1144	xbz_3741	10178.1	9903.47
1145	xbz_3757
1146	xbz_4272	21.3546	21.3679
1147	xbz_4623	20337.2	20796.5
1148	xbz_4627
1149	xbz_4638	201.504	102.391
1150	xbz_4815	188.896	91.4354
1151	xbz_4920	9303.44	27361.2
1152	xbz_4929	356.714	656.497
1153	xbz_4935	7976.26	8087.22
1154	xbz_5066	174.17	64.1377
1155	xbz_5128
1156	xbz_5186	3296.05	8613.1
1157	xbz_5246	29352.5	36455.4
1158	xbz_5256
1159	xbz_5348	3246.35	3406.35
1160	xbz_5349	662.915	200.596
1161	xbz_5371	197.855	175.363
1162	xbz_5579	25228.9	21975.2
1163	xbz_5580		14.3299
1164	xbz_5978	16.4008	16.6591
1165	xbz_6201	401.384	257.079
1166	xbz_630
1167	xbz_6473	1776.42	603.608
1168	xbz_6475	9752.63	14001.9
1169	xbz_6871
1170	xbz_701	984.324	14325.6
1171	xbz_702	7489.53	6929.99
1172	xbz_7110	1128.94	514.022
1173	xbz_7200	16053.8	18330
1174	xbz_73	31.9152	94.4687
1175	xbz_7466
1176	xbz_7517	2676.61	2230.86
1177	xbz_7538
1178	xbz_7657
1179	xbz_7667	1294.54	769.406
1180	xbz_78	20.1088	23.2071
1181	xbz_785
1182	xbz_8049	2687.57	908.004
1183	xbz_8050	16272.7	26791.5
1184	xbz_8189	455.93	246.023
1185	xbz_8207	262.266	135.685
1186	xbz_8230
1187	xbz_8237
1188	xbz_8315
1189	xbz_8328	872.32	1052.54
1190	xbz_8337	17973.8	28830.7
1191	xbz_8338	15499	25530.3
1192	xbz_8613	18.6459
1193	xbz_8644	6296.43	5165.77
1194	xbz_865
1195	xbz_8656
1196	xbz_8692
1197	xbz_8696
1198	xbz_8958	1863.69	553.806
1199	xbz_9202	46.9164
1200	xbz_9235
1201	xbz_9265	3372.05	450.567
1202	xbz_9334
1203	xbz_9343	1575.28	753.708
1204	xbz_9344	252.037	97.7689
1205	xbz_9572	688.556	389.208
1206	xbz_9673
1207	xbz_9755
1208	xbz_9862
1209	xbz_998	37930.7	30881.6

## Sheet: 原始数据
					Sample A		Sample B
索引	探针_ID	目标_序列	行	列	信号强度 (平均){A}	信号强度 (标准偏差) {A}	信号强度 (平均){A}	信号强度(标准偏差) {A}	所在组	所在组型	说明
1	empty		1	1	136.926	13.8616	31.0926	2.94351	control	control_empty
2	xbz_29276	AUCAACAGACAUUAAUUGGGCG	1	2	216.769	11.0298	77.3981	9.90793	experimental
3	he_12335	UAUCUAUUACACUGAUGUUGAC	1	3	148.944	7.49184	32.9815	2.15294	experimental
4	xbz_12548	CGCCUAGUGGUUAGGAUUUGGCG	1	4	17923.4	379.629	2363.8	152.676	experimental
5	he_53032	AGCUACAUUGUCUGCUGGGUUU	1	5	892.093	87.0517	545.12	75.9426	experimental
6	he_24981	CUAAACCAUUCGUAGACGACCUG	1	6	1707.72	197.544	3860.02	204.843	experimental
7	he_38328	GCCCGGUGAUGACCAAGGCUGAGGGGA	1	7	159.815	7.38798	54.4167	6.61226	experimental
8	he_7005	GACGCUGAAGCCUCUUGCUAAUGAUGGC	1	8	163.815	11.1642	37.4444	3.28216	experimental
9	he_26246	UCCUGUGGUCUAGUGGUUAGGAUUCUG	1	9	36552.6	191.658	25810.9	838.683	experimental
10	he_45012	GCAUUGGUUGUUCAGUGGUAGAAUUC	1	10	29679	215.335	33863.9	596.922	experimental
11	empty		1	11	140.102	10.5794	32.1481	1.63955	control	control_empty
12	xbz_29276	AUCAACAGACAUUAAUUGGGCG	1	12	231.731	16.4826	75.1667	6.24799	experimental
13	he_12335	UAUCUAUUACACUGAUGUUGAC	1	13	148.269	9.58348	33.5185	2.15511	experimental
14	xbz_12548	CGCCUAGUGGUUAGGAUUUGGCG	1	14	21326.1	297.9	3200.79	99.0502	experimental
15	he_53032	AGCUACAUUGUCUGCUGGGUUU	1	15	967.444	120.771	555.639	68.881	experimental
16	he_24981	CUAAACCAUUCGUAGACGACCUG	1	16	1861.56	201.23	4057.39	194.472	experimental
17	he_38328	GCCCGGUGAUGACCAAGGCUGAGGGGA	1	17	144.333	11.4802	49.6574	5.348	experimental
18	he_7005	GACGCUGAAGCCUCUUGCUAAUGAUGGC	1	18	142.981	10.1668	36.213	2.76172	experimental
19	he_26246	UCCUGUGGUCUAGUGGUUAGGAUUCUG	1	19	36411.7	338.587	25670.3	709.587	experimental
20	he_45012	GCAUUGGUUGUUCAGUGGUAGAAUUC	1	20	29288.8	468.529	35630	750.239	experimental
21	empty		1	21	139.583	9.1203	34.4722	1.8058	control	control_empty
22	xbz_29276	AUCAACAGACAUUAAUUGGGCG	1	22	220.157	13.9714	98.8241	11.5805	experimental
23	he_12335	UAUCUAUUACACUGAUGUUGAC	1	23	138.546	7.69559	34.75	1.83489	experimental
24	xbz_12548	CGCCUAGUGGUUAGGAUUUGGCG	1	24	23789.1	165.94	4570.69	185.539	experimental
25	he_53032	AGCUACAUUGUCUGCUGGGUUU	1	25	875.065	97.2131	633.472	65.714	experimental
26	he_24981	CUAAACCAUUCGUAGACGACCUG	1	26	1792.65	194.242	4219.59	172.217	experimental
27	he_38328	GCCCGGUGAUGACCAAGGCUGAGGGGA	1	27	158.583	11.392	68.2037	8.90737	experimental
28	he_7005	GACGCUGAAGCCUCUUGCUAAUGAUGGC	1	28	151.444	9.2961	37.2037	3.90963	experimental
29	he_26246	UCCUGUGGUCUAGUGGUUAGGAUUCUG	1	29	35176	388.458	27450.9	436.86	experimental
30	he_45012	GCAUUGGUUGUUCAGUGGUAGAAUUC	1	30	28705.8	251.137	36169.7	454.966	experimental
31	empty		1	31	144.028	9.49516	33.9537	2.66295	control	control_empty
32	PUC2PM		2	1	16114.2	358.178	30715.2	657.733	control	control_spike-calibration	LC Internal Use
33	xbz_16208	AAAGCAUAGAUUCUAAGCU	2	2	147.38	7.75527	35.4444	3.39415	experimental
34	he_18658	AUGGUUCCUGUUCUUAAAGAUG	2	3	145.991	8.23089	33.6667	2.196	experimental
35	xbz_4935	UGCCUGUCUGAGCGUCGCU	2	4	8238.15	464.684	7279.28	243.126	experimental
36	he_43839	UUAGCUAGUAGUUGUACAGUUU	2	5	153.278	6.91853	36.0185	3.16222	experimental
37	he_12546	UAGCAGAUCUGAUAUUGGUUA	2	6	153.444	10.5355	35.3889	2.5388	experimental
38	he_38575	AAUGUAGGUAAGGGAAAUCAGCAAGC	2	7	13305.9	389.523	7420.59	183.057	experimental
39	he_7041	GGCUCGUUGGUCUAGUGGUAUGAUUCUC	2	8	37686.1	338.587	32826.5	478.906	experimental
40	he_26249	CAGAGAAUGUUUAAAUUAGAUGCUUA	2	9	159.315	8.27184	40.1667	3.39736	experimental
41	he_40784	AUUAAAAUGGCUAAAAAAUUUAAUUUA	2	10	148.083	9.70608	37.0741	2.49749	experimental
42	PUC2PM		2	11	17075.2	194.218	29053.7	346.4	control	control_spike-calibration	LC Internal Use
43	xbz_16208	AAAGCAUAGAUUCUAAGCU	2	12	145.056	8.98164	34.8519	2.6889	experimental
44	he_18658	AUGGUUCCUGUUCUUAAAGAUG	2	13	147.157	9.27882	34.463	2.26483	experimental
45	xbz_4935	UGCCUGUCUGAGCGUCGCU	2	14	8433.14	329.169	7531.28	267.258	experimental
46	he_43839	UUAGCUAGUAGUUGUACAGUUU	2	15	145.824	10.7171	32.6944	1.9065	experimental
47	he_12546	UAGCAGAUCUGAUAUUGGUUA	2	16	128.481	11.3273	34.0833	3.04215	experimental
48	he_38575	AAUGUAGGUAAGGGAAAUCAGCAAGC	2	17	14047.5	336.191	7319.94	204.257	experimental
49	he_7041	GGCUCGUUGGUCUAGUGGUAUGAUUCUC	2	18	37553.6	324.864	36159.4	566.509	experimental
50	he_26249	CAGAGAAUGUUUAAAUUAGAUGCUUA	2	19	141.861	7.58683	37.9074	2.39367	experimental
51	he_40784	AUUAAAAUGGCUAAAAAAUUUAAUUUA	2	20	151.759	10.2701	38.8426	2.88133	experimental
52	PUC2PM		2	21	16647.3	239.811	34704.7	616.381	control	control_spike-calibration	LC Internal Use
53	xbz_16208	AAAGCAUAGAUUCUAAGCU	2	22	144.685	9.62148	35.5833	2.69345	experimental
54	he_18658	AUGGUUCCUGUUCUUAAAGAUG	2	23	144.88	8.06367	33.5278	1.92115	experimental
55	xbz_4935	UGCCUGUCUGAGCGUCGCU	2	24	8458.77	283.159	8759.28	238.274	experimental
56	he_43839	UUAGCUAGUAGUUGUACAGUUU	2	25	151.787	7.95084	34.1481	1.6734	experimental
57	he_12546	UAGCAGAUCUGAUAUUGGUUA	2	26	148.972	9.97423	35.4352	2.93631	experimental
58	he_38575	AAUGUAGGUAAGGGAAAUCAGCAAGC	2	27	13840.3	198.123	7942.12	257.647	experimental
59	he_7041	GGCUCGUUGGUCUAGUGGUAUGAUUCUC	2	28	36870.4	431.772	38729.5	709.488	experimental
60	he_26249	CAGAGAAUGUUUAAAUUAGAUGCUUA	2	29	150.176	10.4513	36.2037	2.6325	experimental
61	he_40784	AUUAAAAUGGCUAAAAAAUUUAAUUUA	2	30	146.574	6.12671	34.7778	2.32151	experimental
62	PUC2PM		2	31	16213.6	253.765	31421.6	364.977	control	control_spike-calibration	LC Internal Use
63	PUC2MM		3	1	14378.3	203.364	26562.4	971.969	control	control_spike-calibration	LC Internal Use
64	xbz_22825	UGAGGUAGUAGUUUGUGUCUU	3	2	1960.31	134.762	1079.9	91.2077	experimental
65	he_4201	CAGUGCAAUGUUAAAAGGGCAU	3	3	332.75	28.8237	158.324	17.0852	experimental
66	xbz_14020	CAUUAUUACUUUUGGUACGCG	3	4	154.046	5.84438	34.8426	3.48337	experimental
67	he_51914	UAGUUAUCAGACUGAUGUUUAA	3	5	160.546	7.715	33.5093	2.55224	experimental
68	he_25101	UUCACAGUGGCUAAGUUCUGC	3	6	7638.12	445.117	3229.85	179.989	experimental
69	he_38577	AUUCAAAUGAGAACUUUGAAGGCCGAAG	3	7	617.954	49.4012	827.824	72.4445	experimental
70	he_7043	GGCCCUAUAGCUCAGGGGUUAGAGCACUG	3	8	9878.39	209.268	6929.1	203.23	experimental
71	he_26307	GCGGGCCGCCGGUGAAAUACCACUACU	3	9	9172.88	379.179	16808.6	415.593	experimental
72	he_29304	GGUUCCAUAGUGUAGUGGUUAUCACAUCU	3	10	8854.48	306.964	5696.35	214.051	experimental
73	PUC2MM		3	11	15245.1	221.541	26456.2	393.282	control	control_spike-calibration	LC Internal Use
74	xbz_22825	UGAGGUAGUAGUUUGUGUCUU	3	12	2185.03	104.655	1316.1	89.5114	experimental
75	he_4201	CAGUGCAAUGUUAAAAGGGCAU	3	13	380.713	39.0908	182.556	22.0197	experimental
76	xbz_14020	CAUUAUUACUUUUGGUACGCG	3	14	153.519	10.9651	35.9352	4.14069	experimental
77	he_51914	UAGUUAUCAGACUGAUGUUUAA	3	15	141.667	9.01919	31.2407	1.66251	experimental
78	he_25101	UUCACAGUGGCUAAGUUCUGC	3	16	7782.19	222.845	3440.1	145.792	experimental
79	he_38577	AUUCAAAUGAGAACUUUGAAGGCCGAAG	3	17	535.657	55.9616	771.898	56.5216	experimental
80	he_7043	GGCCCUAUAGCUCAGGGGUUAGAGCACUG	3	18	10174.1	303.155	7165.7	239.931	experimental
81	he_26307	GCGGGCCGCCGGUGAAAUACCACUACU	3	19	9198.73	256.123	18156.1	570.728	experimental
82	he_29304	GGUUCCAUAGUGUAGUGGUUAUCACAUCU	3	20	8854.68	363.713	6264.76	377.59	experimental
83	PUC2MM		3	21	14957.9	189.117	30860	462.658	control	control_spike-calibration	LC Internal Use
84	xbz_22825	UGAGGUAGUAGUUUGUGUCUU	3	22	2230.69	110.988	1583.02	98.3066	experimental
85	he_4201	CAGUGCAAUGUUAAAAGGGCAU	3	23	412.12	39.6484	218.426	21.2564	experimental
86	xbz_14020	CAUUAUUACUUUUGGUACGCG	3	24	154.324	12.6075	35.8889	2.40068	experimental
87	he_51914	UAGUUAUCAGACUGAUGUUUAA	3	25	147.454	6.52011	36.2037	3.16747	experimental
88	he_25101	UUCACAGUGGCUAAGUUCUGC	3	26	7437.02	291.274	3586.56	99.6938	experimental
89	he_38577	AUUCAAAUGAGAACUUUGAAGGCCGAAG	3	27	604.444	56.2688	890.259	56.2038	experimental
90	he_7043	GGCCCUAUAGCUCAGGGGUUAGAGCACUG	3	28	10250.8	184.983	8001.44	233.555	experimental
91	he_26307	GCGGGCCGCCGGUGAAAUACCACUACU	3	29	8914.74	297.891	19023	432.575	experimental
92	he_29304	GGUUCCAUAGUGUAGUGGUUAUCACAUCU	3	30	8755.44	248.681	6441.52	201.803	experimental
93	PUC2MM		3	31	12537.2	471.836	24882.1	792.332	control	control_spike-calibration	LC Internal Use
94	BKG0		4	1	141.167	9.71029	34.6667	2.47605	control	control_empty	LC Internal Use
95	xbz_28632	CGCGGCGGGGCGCGGGAGA	4	2	13865.5	167.889	42628.3	786.117	experimental
96	he_9720	UGCUCUGAUGAAAUCACUAAUAG	4	3	155.009	9.56385	3072.82	149.125	experimental
97	xbz_14021	CGUACCGUGAGUAAUAAUGCG	4	4	1377.59	105.653	559.13	40.7495	experimental
98	he_51983	UGGAAGACUAGUGAUUUUGUUGUUU	4	5	323.981	34.6963	167.824	28.1418	experimental
99	he_13117	UCAUAAGAUCCAAGAAGAAGCA	4	6	155.435	9.2041	38.75	2.82553	experimental
100	he_38583	AUGAUAAACUAUGCCUGGGCAGGGCG	4	7	2473.91	163.024	3459.51	164.676	experimental
101	he_7044	AACUACUUUCUUGAUUCAGGUGUUUU	4	8	154.185	9.39989	33.7037	1.91531	experimental
102	he_26540	GCCCUGUGGUCUAGUGGUUAGGAUUCUG	4	9	38476	271.257	24059.4	449.854	experimental
103	he_41985	AUGAAUGAUGAACAGUAAUAAUGCUGACA	4	10	152.935	9.34017	35.2685	2.42882	experimental
104	BKG0		4	11	144.63	7.40496	34.1019	3.26391	control	control_empty	LC Internal Use
105	xbz_28632	CGCGGCGGGGCGCGGGAGA	4	12	14177.1	137.089	39831.5	376.881	experimental
106	he_9720	UGCUCUGAUGAAAUCACUAAUAG	4	13	156.63	10.1949	3190.54	120.925	experimental
107	xbz_14021	CGUACCGUGAGUAAUAAUGCG	4	14	1422.43	111.385	596.25	52.1642	experimental
108	he_51983	UGGAAGACUAGUGAUUUUGUUGUUU	4	15	340.315	34.3431	162.769	23.1022	experimental
109	he_13117	UCAUAAGAUCCAAGAAGAAGCA	4	16	141.148	12.4118	37.5185	3.89699	experimental
110	he_38583	AUGAUAAACUAUGCCUGGGCAGGGCG	4	17	2527.84	196.336	3785.51	264.508	experimental
111	he_7044	AACUACUUUCUUGAUUCAGGUGUUUU	4	18	139.426	11.4738	35.0556	2.52773	experimental
112	he_26540	GCCCUGUGGUCUAGUGGUUAGGAUUCUG	4	19	38362.4	339.319	27042.3	676.617	experimental
113	he_41985	AUGAAUGAUGAACAGUAAUAAUGCUGACA	4	20	152.741	10.1506	35.5463	2.30556	experimental
114	BKG0		4	21	131.361	8.57235	35.1944	2.04372	control	control_empty	LC Internal Use
115	xbz_28632	CGCGGCGGGGCGCGGGAGA	4	22	13721.6	220.262	47484.3	594.283	experimental
116	he_9720	UGCUCUGAUGAAAUCACUAAUAG	4	23	150.352	8.07015	3920.33	160.778	experimental
117	xbz_14021	CGUACCGUGAGUAAUAAUGCG	4	24	1517.51	79.7326	733.028	49.4545	experimental
118	he_51983	UGGAAGACUAGUGAUUUUGUUGUUU	4	25	355.491	26.2278	204.639	18.2994	experimental
119	he_13117	UCAUAAGAUCCAAGAAGAAGCA	4	26	150.833	6.04732	40.4259	3.44843	experimental
120	he_38583	AUGAUAAACUAUGCCUGGGCAGGGCG	4	27	2691.8	185.491	4377.49	310.239	experimental
121	he_7044	AACUACUUUCUUGAUUCAGGUGUUUU	4	28	150.481	9.64945	37.6481	2.91408	experimental
122	he_26540	GCCCUGUGGUCUAGUGGUUAGGAUUCUG	4	29	36917.6	129.097	28095.4	497.59	experimental
123	he_41985	AUGAAUGAUGAACAGUAAUAAUGCUGACA	4	30	147.519	6.88827	32.1667	2.05758	experimental
124	BKG0		4	31	134.009	6.27783	31.8796	2.35502	control	control_empty	LC Internal Use
125	PUC2PM-20B		5	1	33673.8	326.139	20313	658.898	control	control_spike-calibration	LC Internal Use
126	xbz_26844	UGAGAACCACGUCUGCUCUGA	5	2	177.352	8.40707	49.9722	8.46042	experimental
127	he_16205	AGCUGGUGUUGUGAAUCAGGCCGU	5	3	154.333	10.4381	38.0093	2.22347	experimental
128	xbz_11688	AUCUCGGACGAGCCCCCA	5	4	628.917	58.063	90.2685	10.9814	experimental
129	he_53591	AACUGUUUGCAGAGGAAACUGAGA	5	5	495.537	41.794	204.426	21.3025	experimental
130	he_12202	CACCCGUAGAACCGACCUUGCG	5	6	1569.74	137.647	443.148	49.604	experimental
131	he_38779	GAGUGGUUCAAUUCCACCUUUCGGGCG	5	7	385.454	37.2831	80.287	9.15806	experimental
132	he_7253	CCUGGGCAACAUAGCGAGACCCCGUCUCUU	5	8	2420.77	167.705	757.546	54.8395	experimental
133	he_26559	AAUACAGGACUCUUUCGAGGCCCUGUAA	5	9	183.407	12.4007	45.7222	5.41344	experimental
134	he_26836	AUGCAGAACAUCAUGAAUGACAUGCCG	5	10	149.093	13.7844	33.4352	1.65351	experimental
135	PUC2PM-20B		5	11	35556.9	379.573	19253.1	363.14	control	control_spike-calibration	LC Internal Use
136	xbz_26844	UGAGAACCACGUCUGCUCUGA	5	12	171.944	13.9269	48.9537	4.99978	experimental
137	he_16205	AGCUGGUGUUGUGAAUCAGGCCGU	5	13	163.028	10.1847	37.5648	4.74248	experimental
138	xbz_11688	AUCUCGGACGAGCCCCCA	5	14	644.333	42.7481	100.556	13.0687	experimental
139	he_53591	AACUGUUUGCAGAGGAAACUGAGA	5	15	511.491	44.2268	208.204	26.0581	experimental
140	he_12202	CACCCGUAGAACCGACCUUGCG	5	16	1632.5	87.7421	468.787	40.4891	experimental
141	he_38779	GAGUGGUUCAAUUCCACCUUUCGGGCG	5	17	343.213	35.4491	82.4815	13.288	experimental
142	he_7253	CCUGGGCAACAUAGCGAGACCCCGUCUCUU	5	18	2296.36	178.345	740.37	49.0825	experimental
143	he_26559	AAUACAGGACUCUUUCGAGGCCCUGUAA	5	19	167.213	11.6467	46.037	4.45733	experimental
144	he_26836	AUGCAGAACAUCAUGAAUGACAUGCCG	5	20	144.917	5.4329	35.9352	2.49962	experimental
145	PUC2PM-20B		5	21	35083	358.664	23099.3	423.946	control	control_spike-calibration	LC Internal Use
146	xbz_26844	UGAGAACCACGUCUGCUCUGA	5	22	173.537	11.8656	46.0648	6.29088	experimental
147	he_16205	AGCUGGUGUUGUGAAUCAGGCCGU	5	23	151.769	10.3911	35.3056	2.52634	experimental
148	xbz_11688	AUCUCGGACGAGCCCCCA	5	24	710.722	49.6456	118.454	12.9798	experimental
149	he_53591	AACUGUUUGCAGAGGAAACUGAGA	5	25	524.194	45.4176	234.787	22.5463	experimental
150	he_12202	CACCCGUAGAACCGACCUUGCG	5	26	1588.58	109.696	481.917	25.1374	experimental
151	he_38779	GAGUGGUUCAAUUCCACCUUUCGGGCG	5	27	390.759	33.4987	99.25	15.7635	experimental
152	he_7253	CCUGGGCAACAUAGCGAGACCCCGUCUCUU	5	28	2571.47	207.172	873.509	81.1845	experimental
153	he_26559	AAUACAGGACUCUUUCGAGGCCCUGUAA	5	29	175.759	9.6624	45.8519	4.99685	experimental
154	he_26836	AUGCAGAACAUCAUGAAUGACAUGCCG	5	30	140.648	5.92368	33.7407	2.92067	experimental
155	PUC2PM-20B		5	31	33836.5	276.28	21335.9	343.9	control	control_spike-calibration	LC Internal Use
156	PUC2MM-20B		6	1	149.167	8.4483	36.1944	3.32495	control	control_spike-calibration	LC Internal Use
157	xbz_16439	AAGUGUUUGUGGGUUA	6	2	147.694	8.51986	32.7593	1.99939	experimental
158	he_11733	CAUUGCACUCGGUCUGA	6	3	152.278	11.6578	34.2593	3.76251	experimental
159	xbz_3169	GCCCCUGGGCCUAUCCUAGAAC	6	4	191.296	15.9504	53.7315	6.6972	experimental
160	he_37871	UUAGCUCAGCAGGAAGAGCA	6	5	5143.71	146.466	760.093	54.4561	experimental
161	he_17857	CACGCUCAUGCACACACCCACA	6	6	674.574	63.2528	383.722	38.3496	experimental
162	he_38881	CCUCUUACUGCUAAAUUGGACUGGCUU	6	7	179.444	11.3264	36.1852	3.90578	experimental
163	he_7363	UGAUCACAACCAGUUACAGAUUUCUUUA	6	8	4175.98	96.099	461.778	18.6379	experimental
164	he_53286	UCCCCCAGGUGUGAUUCUGAUUUG	6	9	196.824	10.6699	42.0926	3.25415	experimental
165	he_33102	AUCAGUGAUGUGGAUCUAUUGACUGAGU	6	10	151.519	7.50138	32.7778	1.98279	experimental
166	PUC2MM-20B		6	11	159.639	14.1252	35.8981	2.75118	control	control_spike-calibration	LC Internal Use
167	xbz_16439	AAGUGUUUGUGGGUUA	6	12	147.537	9.75535	32.6111	2.71319	experimental
168	he_11733	CAUUGCACUCGGUCUGA	6	13	149.981	12.6543	34.787	3.08464	experimental
169	xbz_3169	GCCCCUGGGCCUAUCCUAGAAC	6	14	190.731	12.0943	59.2593	5.43332	experimental
170	he_37871	UUAGCUCAGCAGGAAGAGCA	6	15	4837.73	241.192	677.88	39.3982	experimental
171	he_17857	CACGCUCAUGCACACACCCACA	6	16	678.917	52.5706	387.685	33.2112	experimental
172	he_38881	CCUCUUACUGCUAAAUUGGACUGGCUU	6	17	166.426	14.3944	35.287	1.68029	experimental
173	he_7363	UGAUCACAACCAGUUACAGAUUUCUUUA	6	18	4231.35	158.692	494.426	51.4317	experimental
174	he_53286	UCCCCCAGGUGUGAUUCUGAUUUG	6	19	187.287	13.5847	38.0833	3.4128	experimental
175	he_33102	AUCAGUGAUGUGGAUCUAUUGACUGAGU	6	20	138.611	7.06291	32.8889	2.75929	experimental
176	PUC2MM-20B		6	21	150.389	8.13764	35.7407	3.49732	control	control_spike-calibration	LC Internal Use
177	xbz_16439	AAGUGUUUGUGGGUUA	6	22	146.694	8.84705	30.9259	1.22057	experimental
178	he_11733	CAUUGCACUCGGUCUGA	6	23	149.611	8.38761	35.6389	2.80673	experimental
179	xbz_3169	GCCCCUGGGCCUAUCCUAGAAC	6	24	201.889	14.2896	57.7593	5.52965	experimental
180	he_37871	UUAGCUCAGCAGGAAGAGCA	6	25	4856.56	156.534	861.787	55.2513	experimental
181	he_17857	CACGCUCAUGCACACACCCACA	6	26	727.667	42.1056	445.167	21.6106	experimental
182	he_38881	CCUCUUACUGCUAAAUUGGACUGGCUU	6	27	173.296	7.46238	35.4167	3.109	experimental
183	he_7363	UGAUCACAACCAGUUACAGAUUUCUUUA	6	28	4262.24	104.465	577.713	54.7543	experimental
184	he_53286	UCCCCCAGGUGUGAUUCUGAUUUG	6	29	191.713	11.2666	42.1389	3.35851	experimental
185	he_33102	AUCAGUGAUGUGGAUCUAUUGACUGAGU	6	30	146.75	7.70377	31.7222	2.48296	experimental
186	PUC2MM-20B		6	31	154.731	10.9345	36.1944	3.28536	control	control_spike-calibration	LC Internal Use
187	a3-PUC2PM-20B		7	1	42362.7	458.734	21322.5	497.728	control	control_spike-calibration	LC Internal Use
188	xbz_16911	AAAUUGAUGGUGUAGUUA	7	2	149.713	12.9442	33.1019	2.4224	experimental
189	he_19849	UGAGGUAGAAGUUGGGCUGCU	7	3	155.935	6.37207	40.2685	5.16206	experimental
190	xbz_8230	AAUCUUGAGUUGUGAU	7	4	150.463	7.74889	33.5556	2.23955	experimental
191	he_49840	GCUGGUUUCAUAUGGUGGUUUAGA	7	5	425.657	35.8139	71.4352	9.3101	experimental
192	he_24677	GUACAGUACUGUGAUAACUGAAGA	7	6	275.333	18.3502	67.8796	8.99815	experimental
193	he_38904	GCAGCUAGCUCAGUCGGUAGAGCAUGAG	7	7	18255.8	405.35	7315.09	210.747	experimental
194	he_8109	GGUUCCAUGGUGUAAUGGUUAGCAUG	7	8	199.5	17.7098	61.9259	6.08768	experimental
195	he_35265	UGUUAUGAUGAGAUUCCACUUAAG	7	9	152.12	9.10142	38.6204	3.20548	experimental
196	he_32556	CUUUGAAAGGAUCGUCUUGUAUGGUG	7	10	157.713	12.1886	32.8241	2.6292	experimental
197	a3-PUC2PM-20B		7	11	44350.8	398.276	20421.1	292.55	control	control_spike-calibration	LC Internal Use
198	xbz_16911	AAAUUGAUGGUGUAGUUA	7	12	154.528	4.99805	33.6574	2.58016	experimental
199	he_19849	UGAGGUAGAAGUUGGGCUGCU	7	13	154	9.37784	37.4537	3.32755	experimental
200	xbz_8230	AAUCUUGAGUUGUGAU	7	14	147.648	9.15935	32.3241	2.09507	experimental
201	he_49840	GCUGGUUUCAUAUGGUGGUUUAGA	7	15	423.944	38.0881	66.6111	9.46793	experimental
202	he_24677	GUACAGUACUGUGAUAACUGAAGA	7	16	266.12	26.9571	68.5185	8.59415	experimental
203	he_38904	GCAGCUAGCUCAGUCGGUAGAGCAUGAG	7	17	18253.2	236.047	7672.75	377.914	experimental
204	he_8109	GGUUCCAUGGUGUAAUGGUUAGCAUG	7	18	185.37	13.8743	59.6852	10.949	experimental
205	he_35265	UGUUAUGAUGAGAUUCCACUUAAG	7	19	141.426	6.84297	36.5	2.79017	experimental
206	he_32556	CUUUGAAAGGAUCGUCUUGUAUGGUG	7	20	146.843	11.1801	34.3241	2.31544	experimental
207	a3-PUC2PM-20B		7	21	43700.8	288.526	24077.8	354.541	control	control_spike-calibration	LC Internal Use
208	xbz_16911	AAAUUGAUGGUGUAGUUA	7	22	143.389	9.08304	32.6296	1.39151	experimental
209	he_19849	UGAGGUAGAAGUUGGGCUGCU	7	23	148.778	9.36122	36.8241	3.81788	experimental
210	xbz_8230	AAUCUUGAGUUGUGAU	7	24	142.963	7.71808	32.6759	2.61494	experimental
211	he_49840	GCUGGUUUCAUAUGGUGGUUUAGA	7	25	414.009	27.7632	74.6759	10.1123	experimental
212	he_24677	GUACAGUACUGUGAUAACUGAAGA	7	26	280.741	15.6625	86.1759	8.86222	experimental
213	he_38904	GCAGCUAGCUCAGUCGGUAGAGCAUGAG	7	27	17610.2	193.758	7843.4	176.251	experimental
214	he_8109	GGUUCCAUGGUGUAAUGGUUAGCAUG	7	28	199.417	8.59485	70.5093	12.1613	experimental
215	he_35265	UGUUAUGAUGAGAUUCCACUUAAG	7	29	149.259	5.69041	38.037	3.72896	experimental
216	he_32556	CUUUGAAAGGAUCGUCUUGUAUGGUG	7	30	154.88	5.252	31.5833	2.02381	experimental
217	a3-PUC2PM-20B		7	31	41743.7	359.141	22465.8	391.523	control	control_spike-calibration	LC Internal Use
218	a3-PUC2MM-20B		8	1	163.361	12.0423	40.8519	5.28941	control	control_spike-calibration	LC Internal Use
219	xbz_27606	UACGUCAUCGUUGUCAUCGUCA	8	2	152.269	8.73986	33.0185	3.78877	experimental
220	he_12051	UGAGACCUCUGGGUUCUGAGC	8	3	170.407	9.71177	39.213	3.31254	experimental
221	xbz_8049	AACCCGUAGAUCCGAUCUUGUG	8	4	2898.77	175.264	832.602	63.2983	experimental
222	he_31400	AAAAGUAUUUGCGGGUUUUGU	8	5	156.037	6.56374	32.8148	2.3804	experimental
223	he_26314	AAUGGCGCCACUAGGGUUGUGC	8	6	184.889	12.3291	48	3.04484	experimental
224	he_39032	AAACUGUGAUGAGGCACAAACUGAGU	8	7	158.769	7.9256	45.8056	4.49186	experimental
225	he_8209	UCUGUAGUGUAGUGGUUAUCACGUUU	8	8	330.648	31.8261	57.287	8.61541	experimental
226	he_53509	UUGGGGACAUUUUGCAUUCAU	8	9	153.852	8.65412	32.9537	3.10075	experimental
227	he_51829	CAUACGCACGUAGACAUUCCCCGCUUCCC	8	10	170.278	11.6136	44.9722	5.80921	experimental
228	a3-PUC2MM-20B		8	11	159.611	6.87381	44.5278	3.56635	control	control_spike-calibration	LC Internal Use
229	xbz_27606	UACGUCAUCGUUGUCAUCGUCA	8	12	159.667	8.26319	30.7407	1.86643	experimental
230	he_12051	UGAGACCUCUGGGUUCUGAGC	8	13	168.278	11.7098	40.537	3.48676	experimental
231	xbz_8049	AACCCGUAGAUCCGAUCUUGUG	8	14	2893.07	88.0663	869.565	69.3344	experimental
232	he_31400	AAAAGUAUUUGCGGGUUUUGU	8	15	142.889	11.3519	32.6204	2.67462	experimental
233	he_26314	AAUGGCGCCACUAGGGUUGUGC	8	16	167.509	15.1055	44.1296	5.04205	experimental
234	he_39032	AAACUGUGAUGAGGCACAAACUGAGU	8	17	142.046	8.27606	43.037	4.41943	experimental
235	he_8209	UCUGUAGUGUAGUGGUUAUCACGUUU	8	18	336.157	18.5931	56.8241	7.15232	experimental
236	he_53509	UUGGGGACAUUUUGCAUUCAU	8	19	138.287	15.0402	33.1204	2.48629	experimental
237	he_51829	CAUACGCACGUAGACAUUCCCCGCUUCCC	8	20	162.176	8.68862	47.4907	7.43004	experimental
238	a3-PUC2MM-20B		8	21	162.306	10.4376	43.2963	5.18672	control	control_spike-calibration	LC Internal Use
239	xbz_27606	UACGUCAUCGUUGUCAUCGUCA	8	22	136.306	5.72004	32.1111	1.79997	experimental
240	he_12051	UGAGACCUCUGGGUUCUGAGC	8	23	168.287	7.59248	39.2778	4.43822	experimental
241	xbz_8049	AACCCGUAGAUCCGAUCUUGUG	8	24	2968.67	82.0351	1020.75	72.8025	experimental
242	he_31400	AAAAGUAUUUGCGGGUUUUGU	8	25	153.926	10.3839	35.1574	2.60539	experimental
243	he_26314	AAUGGCGCCACUAGGGUUGUGC	8	26	191.426	16.5084	47.4444	5.03693	experimental
244	he_39032	AAACUGUGAUGAGGCACAAACUGAGU	8	27	150.333	8.30494	50.037	8.3866	experimental
245	he_8209	UCUGUAGUGUAGUGGUUAUCACGUUU	8	28	386.287	21.6022	66.3333	5.43956	experimental
246	he_53509	UUGGGGACAUUUUGCAUUCAU	8	29	145.574	9.17046	32.1019	1.76646	experimental
247	he_51829	CAUACGCACGUAGACAUUCCCCGCUUCCC	8	30	155.204	5.86094	43.2593	5.70517	experimental
248	a3-PUC2MM-20B		8	31	165.676	10.6058	40.6204	4.09859	control	control_spike-calibration	LC Internal Use
249	rt_chr3_E_1	AAAGACCUGGCUUGUAAUUCUUUUAACCCCUG	9	1	155.065	11.8142	30.6759	1.88367	experimental
250	xbz_27642	AAAAGCUGGGUUGAGAGGGCGA	9	2	6630.99	232.722	5205.73	185.509	experimental
251	he_6625	AGAGAAAGGAAACUUAGAUCUGUC	9	3	149.056	9.25933	34.8796	3.0224	experimental
252	xbz_9343	AAGGAGCUCACAGUCUAUUGAG	9	4	1799.21	98.7375	673.398	31.4238	experimental
253	he_35606	CCGCGCGGGGGGCCCGGGC	9	5	12169.5	294.046	14855.2	254.218	experimental
254	he_17154	ACCAAUAUUACUGUGCUGCUUU	9	6	207.213	15.0395	39.4722	2.67022	experimental
255	he_39049	GACUUGUGAUGAAUCUUGGCUUCCUGAAG	9	7	159.102	10.5165	44.5926	3.06941	experimental
256	he_8520	GGGGGUAUAGCUCAGUGGGUAGAGCAUUU	9	8	20766.5	231.947	18108.4	192.625	experimental
257	he_38045	UGAGGUAGUAUUUUUUGUUGUUUGUUUU	9	9	152.963	9.6334	32.4167	2.30451	experimental
258	he_39085	AUGUGAUGUCAGGGCCUGCGUGGUAA	9	10	152.111	5.70183	35.5926	3.15351	experimental
259	rt_chr4_A_3	UUGUCUUACUUUCCUCACAUAAGGAGUUAUUU	9	11	150.574	7.92158	31.1481	2.52766	experimental
260	xbz_27642	AAAAGCUGGGUUGAGAGGGCGA	9	12	6837.1	122.658	5341.28	140.769	experimental
261	he_6625	AGAGAAAGGAAACUUAGAUCUGUC	9	13	151.639	9.90181	34.1389	2.6807	experimental
262	xbz_9343	AAGGAGCUCACAGUCUAUUGAG	9	14	1730.46	87.4078	751.778	53.864	experimental
263	he_35606	CCGCGCGGGGGGCCCGGGC	9	15	12123.9	201.171	15159.9	314.779	experimental
264	he_17154	ACCAAUAUUACUGUGCUGCUUU	9	16	183.741	8.38487	37.3611	4.02436	experimental
265	he_39049	GACUUGUGAUGAAUCUUGGCUUCCUGAAG	9	17	132.046	9.76201	40.3611	4.38872	experimental
266	he_8520	GGGGGUAUAGCUCAGUGGGUAGAGCAUUU	9	18	20905.7	195.85	19365.5	447.162	experimental
267	he_38045	UGAGGUAGUAUUUUUUGUUGUUUGUUUU	9	19	141.009	14.023	31.6481	2.73542	experimental
268	he_39085	AUGUGAUGUCAGGGCCUGCGUGGUAA	9	20	152.241	8.59131	37.5556	4.20354	experimental
269	rt_chr6_A_5	UUAGUUCUCUAUUCUUAUCAUUGAUUAUCAGA	9	21	145.62	8.91152	32.25	2.25946	experimental
270	xbz_27642	AAAAGCUGGGUUGAGAGGGCGA	9	22	6812	141.646	6032.5	171.919	experimental
271	he_6625	AGAGAAAGGAAACUUAGAUCUGUC	9	23	150.852	8.42206	34.3241	2.61137	experimental
272	xbz_9343	AAGGAGCUCACAGUCUAUUGAG	9	24	1753.08	85.0768	858.287	72.5801	experimental
273	he_35606	CCGCGCGGGGGGCCCGGGC	9	25	11998.5	220.334	17244.2	330.879	experimental
274	he_17154	ACCAAUAUUACUGUGCUGCUUU	9	26	193.231	12.327	40.6944	3.50822	experimental
275	he_39049	GACUUGUGAUGAAUCUUGGCUUCCUGAAG	9	27	158.685	8.71528	43.1019	4.42157	experimental
276	he_8520	GGGGGUAUAGCUCAGUGGGUAGAGCAUUU	9	28	20372.3	260.224	20215.8	376.18	experimental
277	he_38045	UGAGGUAGUAUUUUUUGUUGUUUGUUUU	9	29	147.704	4.70287	32.1389	1.55557	experimental
278	he_39085	AUGUGAUGUCAGGGCCUGCGUGGUAA	9	30	147.037	9.87958	33.7315	1.67224	experimental
279	chr2_D_1	AUUCAAAGACAAGAUUAUAUCUGCUUUUUAUU	9	31	149.546	6.95968	30.8333	2.53757	experimental
280	chr11_A_7	GCUCUGCCCCACUUUCCUCACUCCAGGACUCA	10	1	163.954	9.34228	32.1296	2.22178	experimental
281	xbz_27054	GGGCGGCUUGCAGAGCGGCCA	10	2	7742.69	131.61	10523.3	158.183	experimental
282	he_4926	AGGCAGUGUCAUUAGCUGAUUGU	10	3	154.38	9.7585	33.2685	2.71585	experimental
283	xbz_4638	AAGGUAGAUAGAACAGGUCUUG	10	4	353.796	27.025	113.083	9.7378	experimental
284	he_49837	ACUGAUUUCUUUUGGUGUUCAGA	10	5	152.083	7.85514	35.9167	2.60885	experimental
285	he_25626	CAUUAUUACUUUUGGUACGCG	10	6	160.926	10.4985	34.6204	2.17341	experimental
286	he_39302	GCCUUGGUGUAUAGUGGUGAGCAUAGCU	10	7	29879.6	198.014	27874.3	389.336	experimental
287	he_8569	UGGAAGACUAGUGAUUUUGUUGUUGU	10	8	365.12	30.0988	173.565	24.1948	experimental
288	he_29697	CUGAAGACGAAUAAGAAUUUGUAG	10	9	154.435	9.67729	32.8704	3.39073	experimental
289	he_52010	UUGCAGUACUUCCAGGAAUGGUGCACCA	10	10	389.972	23.8568	187.028	24.7788	experimental
290	chr2_B_2	AAAUAGUAAAUUUUAAUGAUCAGAUUUAAAAU	10	11	149.019	5.06035	31.1667	2.03015	experimental
291	xbz_27054	GGGCGGCUUGCAGAGCGGCCA	10	12	7674.72	126.374	10954.9	239.915	experimental
292	he_4926	AGGCAGUGUCAUUAGCUGAUUGU	10	13	159.167	8.58873	33.8796	2.19905	experimental
293	xbz_4638	AAGGUAGAUAGAACAGGUCUUG	10	14	346.093	28.7183	125.704	15.4607	experimental
294	he_49837	ACUGAUUUCUUUUGGUGUUCAGA	10	15	142.102	9.68759	32.6574	3.20677	experimental
295	he_25626	CAUUAUUACUUUUGGUACGCG	10	16	144.204	8.46517	36.0648	2.85236	experimental
296	he_39302	GCCUUGGUGUAUAGUGGUGAGCAUAGCU	10	17	29447.7	361.866	28465.7	539.614	experimental
297	he_8569	UGGAAGACUAGUGAUUUUGUUGUUGU	10	18	367.778	30.6153	169.685	19.9151	experimental
298	he_29697	CUGAAGACGAAUAAGAAUUUGUAG	10	19	140.685	12.941	34.5185	2.61012	experimental
299	he_52010	UUGCAGUACUUCCAGGAAUGGUGCACCA	10	20	383.694	24.4033	205.991	19.5331	experimental
300	chr18_B_3	CUAUAGGGACAGCCAAGGCCUGAGUGCUAGGA	10	21	143.12	7.15217	34.7315	2.68818	experimental
301	xbz_27054	GGGCGGCUUGCAGAGCGGCCA	10	22	7678.48	98.4156	12717.2	295.419	experimental
302	he_4926	AGGCAGUGUCAUUAGCUGAUUGU	10	23	153.407	7.58261	34.3333	3.07234	experimental
303	xbz_4638	AAGGUAGAUAGAACAGGUCUUG	10	24	350.361	19.3837	142.611	11.971	experimental
304	he_49837	ACUGAUUUCUUUUGGUGUUCAGA	10	25	144.194	7.90299	36.3704	3.65982	experimental
305	he_25626	CAUUAUUACUUUUGGUACGCG	10	26	161.241	7.22647	35.9259	2.18621	experimental
306	he_39302	GCCUUGGUGUAUAGUGGUGAGCAUAGCU	10	27	28714.6	304.226	29117	436.416	experimental
307	he_8569	UGGAAGACUAGUGAUUUUGUUGUUGU	10	28	395.194	17.4187	224.898	21.4293	experimental
308	he_29697	CUGAAGACGAAUAAGAAUUUGUAG	10	29	155.657	8.56221	32.25	2.25117	experimental
309	he_52010	UUGCAGUACUUCCAGGAAUGGUGCACCA	10	30	378.926	29.2261	225.056	18.6582	experimental
310	empty		10	31	129.343	7.12264	30.5741	1.86559	control	control_empty
311	chr9_B_6	AAUAUACUUGUAUUUAUUUACUAUUACCACAG	11	1	151.759	7.23164	32.1204	2.06311	experimental
312	xbz_18744	GAAGGUUUAGAUGUUACU	11	2	149.796	9.34065	33.2685	2.72615	experimental
313	he_17193	UGAGUUAGUAGAUGUGUGGUUU	11	3	154.028	9.69773	35.8981	3.83525	experimental
314	xbz_6473	CACCCGUAGAACCGACCUUGCG	11	4	1899.96	76.8129	554.343	28.9212	experimental
315	he_43858	AAUUUAGGACUAUGUAGCAUA	11	5	157.204	8.72397	32.0093	2.85963	experimental
316	he_23414	UAAUAACAGUAGUAGACAACGUUUA	11	6	156.935	11.4249	34.287	2.12704	experimental
317	he_39456	GGCCGGUUAGCUCAGUUGGUUAGAGCAUGG	11	7	5477.51	204.716	2510.7	88.4618	experimental
318	he_8749	UCUGGUGAUGAAAUGGAACGUUUCUGAUG	11	8	159.593	10.1659	38.4907	3.38356	experimental
319	he_45492	AACUAUUUAAGAUACAUUGG	11	9	154.398	9.25742	33.2315	2.03982	experimental
320	he_35232	UACAUGCCGACGGGCACUGACCUCCUU	11	10	946.185	56.1059	4267.36	175.684	experimental
321	chr10_C_2	AAUAUUUCACAUUCUUUAGAAAGUUUGUUUUU	11	11	150.194	7.92896	30.7778	2.49236	experimental
322	xbz_18744	GAAGGUUUAGAUGUUACU	11	12	152.194	11.8586	31.6296	3.86112	experimental
323	he_17193	UGAGUUAGUAGAUGUGUGGUUU	11	13	157.361	11.7119	35.6204	2.26603	experimental
324	xbz_6473	CACCCGUAGAACCGACCUUGCG	11	14	2006.81	100.582	600.361	58.2236	experimental
325	he_43858	AAUUUAGGACUAUGUAGCAUA	11	15	140.185	9.71476	31.787	2.40347	experimental
326	he_23414	UAAUAACAGUAGUAGACAACGUUUA	11	16	137.157	9.4277	34.3704	2.66368	experimental
327	he_39456	GGCCGGUUAGCUCAGUUGGUUAGAGCAUGG	11	17	5839.29	208.504	2655.19	92.7687	experimental
328	he_8749	UCUGGUGAUGAAAUGGAACGUUUCUGAUG	11	18	143.583	11.4305	38.0556	3.75122	experimental
329	he_45492	AACUAUUUAAGAUACAUUGG	11	19	133.935	10.6273	32.1481	2.66095	experimental
330	he_35232	UACAUGCCGACGGGCACUGACCUCCUU	11	20	951.472	66.3419	4183.53	193.58	experimental
331	chr2_B_2	AAAUAGUAAAUUUUAAUGAUCAGAUUUAAAAU	11	21	151.028	7.14791	32.6481	2.31337	experimental
332	xbz_18744	GAAGGUUUAGAUGUUACU	11	22	140.12	9.25013	33.3148	2.6143	experimental
333	he_17193	UGAGUUAGUAGAUGUGUGGUUU	11	23	145.417	11.1087	37.7037	3.55007	experimental
334	xbz_6473	CACCCGUAGAACCGACCUUGCG	11	24	2006.68	91.6895	691.602	44.5001	experimental
335	he_43858	AAUUUAGGACUAUGUAGCAUA	11	25	149.028	9.9235	34.037	1.78742	experimental
336	he_23414	UAAUAACAGUAGUAGACAACGUUUA	11	26	150.38	6.07849	35.6296	3.20803	experimental
337	he_39456	GGCCGGUUAGCUCAGUUGGUUAGAGCAUGG	11	27	5806.02	159.714	2891.39	105.153	experimental
338	he_8749	UCUGGUGAUGAAAUGGAACGUUUCUGAUG	11	28	148.685	8.96478	37.6111	2.89645	experimental
339	he_45492	AACUAUUUAAGAUACAUUGG	11	29	141.935	10.6	31.25	1.85515	experimental
340	he_35232	UACAUGCCGACGGGCACUGACCUCCUU	11	30	968.657	61.5996	4557.61	265.201	experimental
341	rt_chr2_B_1	UUUGAUUGUUAUUUAUUGACUUGUGUUUGUCU	11	31	145.444	6.51	31.1667	2.73947	experimental
342	chr13_D_6	UGGCCACAUUUCUCCUGGUAUAAGUCACUUGC	12	1	152.685	9.78904	30.6667	2.83503	experimental
343	xbz_27253	AGGCGGAGACUUGGGCAAUUG	12	2	186.056	11.3893	285.741	26.6463	experimental
344	he_14144	ACAUCGAAACUCUGGAAAAAG	12	3	150.88	9.14853	32.4259	2.28037	experimental
345	xbz_13871	CAGUCCAUGGGCAUAUACACUU	12	4	176.843	12.6905	37.6111	3.09305	experimental
346	he_41210	UCCUCAUUUGUAUAGUGGUGAGUA	12	5	5494.25	338.479	920.398	81.893	experimental
347	he_25328	GCAGUCCAUGGGCAUAUACACU	12	6	177.954	9.71114	41.3241	2.84105	experimental
348	he_39736	CUUCUCAUUACUGCACUUGACUAGUCUU	12	7	5583.28	176.81	513.343	44.136	experimental
349	he_8774	AGGGAUUGUGGGUUCGAGUCCCACCCGG	12	8	708.111	40.3731	459.787	41.1039	experimental
350	he_30693	CCUGGGUGACAAAGGGAGAUUCUGGUUU	12	9	151.472	5.43175	34.1204	2.8993	experimental
351	he_38877	GAAAUUCAUAAAGUACAGACAUGUUUU	12	10	151.648	6.68142	33.3056	2.57761	experimental
352	rt_chr1_A_1	AUAGCCAAAACUGUCUUGAAAUAGAACAAAGU	12	11	149.648	7.42604	31.3611	2.98112	experimental
353	xbz_27253	AGGCGGAGACUUGGGCAAUUG	12	12	190.991	14.039	388.917	38.6915	experimental
354	he_14144	ACAUCGAAACUCUGGAAAAAG	12	13	145.676	5.04156	34.9815	3.7466	experimental
355	xbz_13871	CAGUCCAUGGGCAUAUACACUU	12	14	168.046	14.0462	39.3148	4.43994	experimental
356	he_41210	UCCUCAUUUGUAUAGUGGUGAGUA	12	15	7897.66	479.663	1354.55	105.584	experimental
357	he_25328	GCAGUCCAUGGGCAUAUACACU	12	16	165.278	17.0923	39.6389	4.4877	experimental
358	he_39736	CUUCUCAUUACUGCACUUGACUAGUCUU	12	17	5506.4	204.124	471.676	33.3928	experimental
359	he_8774	AGGGAUUGUGGGUUCGAGUCCCACCCGG	12	18	686.602	60.1611	456.824	42.8442	experimental
360	he_30693	CCUGGGUGACAAAGGGAGAUUCUGGUUU	12	19	136.241	14.1143	33.7963	1.91774	experimental
361	he_38877	GAAAUUCAUAAAGUACAGACAUGUUUU	12	20	146.602	9.34984	35.0556	2.60062	experimental
362	chr10_C_2	AAUAUUUCACAUUCUUUAGAAAGUUUGUUUUU	12	21	143.435	10.531	31.1574	1.91971	experimental
363	xbz_27253	AGGCGGAGACUUGGGCAAUUG	12	22	193.926	13.1964	573.019	47.1674	experimental
364	he_14144	ACAUCGAAACUCUGGAAAAAG	12	23	140.5	10.4358	33.287	3.31254	experimental
365	xbz_13871	CAGUCCAUGGGCAUAUACACUU	12	24	156.361	9.29321	39.1759	3.57517	experimental
366	he_41210	UCCUCAUUUGUAUAGUGGUGAGUA	12	25	9535.23	370.013	2090.95	82.7212	experimental
367	he_25328	GCAGUCCAUGGGCAUAUACACU	12	26	176.537	18.3774	45.8241	3.61675	experimental
368	he_39736	CUUCUCAUUACUGCACUUGACUAGUCUU	12	27	5525.19	134.947	551.324	37.0959	experimental
369	he_8774	AGGGAUUGUGGGUUCGAGUCCCACCCGG	12	28	723.259	49.472	505.361	33.8284	experimental
370	he_30693	CCUGGGUGACAAAGGGAGAUUCUGGUUU	12	29	148.806	10.5259	33.5185	2.2733	experimental
371	he_38877	GAAAUUCAUAAAGUACAGACAUGUUUU	12	30	151.102	9.99246	31.8148	2.71082	experimental
372	rt_chr6_A_5	UUAGUUCUCUAUUCUUAUCAUUGAUUAUCAGA	12	31	148.787	11.7839	30.3148	2.11204	experimental
373	rt_chr2_D_2	AGGAUUGCAGUCACUGCAUGAAGUUAGUCACC	13	1	149.565	10.3375	32.5185	2.81346	experimental
374	xbz_25711	UUAUGGUUUGCCUGGGACUGA	13	2	236.009	14.5085	89.9722	18.2303	experimental
375	he_19909	CUUAACUUGACCUCUUUAAA	13	3	155.787	6.64458	31.5556	1.95908	experimental
376	xbz_11369	UAGAGGAGAUGGCGCAGGGG	13	4	428.093	29.8734	455.602	43.1518	experimental
377	he_38547	CUGGAGAUAUGGAAGAGCUGUGU	13	5	157.889	8.3233	35.3333	1.64629	experimental
378	he_18545	UGGAAAUGAUGAUUAUACUGAUU	13	6	156.87	7.32693	37.3611	2.43594	experimental
379	he_39883	CCGUGGUGGUAUAGUGGUGAGCAUAGCU	13	7	31649.9	202.136	31364.8	408.207	experimental
380	he_8776	GGCUCGUUGGUCUAGGGGUGUGGUUCUC	13	8	43825.9	354.935	35939.4	553.339	experimental
381	he_35260	UUGUGACUGUUCCUGGUAUUGAUU	13	9	151.417	9.368	38.6574	2.79573	experimental
382	he_27781	UGUGGAUAAAGGAGAAAACUACUGUU	13	10	151.5	10.9301	33.4444	2.56261	experimental
383	rt_chr9_F_1	AGCCUGCUGCUGUAGCCAAGACAGCUUGUUUU	13	11	151.75	9.68198	31.3148	2.29851	experimental
384	xbz_25711	UUAUGGUUUGCCUGGGACUGA	13	12	247.306	7.96541	95.7037	10.7619	experimental
385	he_19909	CUUAACUUGACCUCUUUAAA	13	13	155.565	11.0752	33.6574	1.48615	experimental
386	xbz_11369	UAGAGGAGAUGGCGCAGGGG	13	14	421.694	24.4389	491.935	54.0696	experimental
387	he_38547	CUGGAGAUAUGGAAGAGCUGUGU	13	15	143.833	11.3595	34.8611	3.4301	experimental
388	he_18545	UGGAAAUGAUGAUUAUACUGAUU	13	16	142.315	11.835	34.6667	2.72064	experimental
389	he_39883	CCGUGGUGGUAUAGUGGUGAGCAUAGCU	13	17	31006.6	253.668	30569.2	476.372	experimental
390	he_8776	GGCUCGUUGGUCUAGGGGUGUGGUUCUC	13	18	43262.4	333.678	36076.5	580.697	experimental
391	he_35260	UUGUGACUGUUCCUGGUAUUGAUU	13	19	146.083	9.5498	37.5556	3.4024	experimental
392	he_27781	UGUGGAUAAAGGAGAAAACUACUGUU	13	20	147.472	11.6815	36.3519	2.85577	experimental
393	rt_chr1_A_1	AUAGCCAAAACUGUCUUGAAAUAGAACAAAGU	13	21	150.389	8.96289	32.2037	1.61048	experimental
394	xbz_25711	UUAUGGUUUGCCUGGGACUGA	13	22	242.806	17.7002	99.7685	13.9523	experimental
395	he_19909	CUUAACUUGACCUCUUUAAA	13	23	148.972	8.33129	34.6389	2.06193	experimental
396	xbz_11369	UAGAGGAGAUGGCGCAGGGG	13	24	462.491	40.9761	684.704	40.8435	experimental
397	he_38547	CUGGAGAUAUGGAAGAGCUGUGU	13	25	159.315	7.97267	36.6759	2.17818	experimental
398	he_18545	UGGAAAUGAUGAUUAUACUGAUU	13	26	151.648	10.8622	37.0556	2.2249	experimental
399	he_39883	CCGUGGUGGUAUAGUGGUGAGCAUAGCU	13	27	30348.2	190.385	31452.2	226.802	experimental
400	he_8776	GGCUCGUUGGUCUAGGGGUGUGGUUCUC	13	28	42071.6	441.848	38498.4	674.891	experimental
401	he_35260	UUGUGACUGUUCCUGGUAUUGAUU	13	29	150.972	9.39622	36.463	2.98728	experimental
402	he_27781	UGUGGAUAAAGGAGAAAACUACUGUU	13	30	143.639	8.71722	31.4352	2.08364	experimental
403	chr18_B_3	CUAUAGGGACAGCCAAGGCCUGAGUGCUAGGA	13	31	152.528	9.47151	33.3056	3.15772	experimental
404	rt_chr1_G_1	UUUUAUUAUGUAUAAAAAUUUGAUUAUAAAUC	14	1	144.444	6.76209	31.2685	2.33865	experimental
405	xbz_26134	AAUUUCGGUUGGGGA	14	2	155.565	11.3486	36.3333	3.26694	experimental
406	he_8862	AACUGGCCCUCAAAGUCCCGCU	14	3	544.935	34.9101	354.324	22.9599	experimental
407	xbz_9334	UCCCUUUGGAGCUGAUU	14	4	148.046	10.1183	32.2778	2.0591	experimental
408	he_29970	AGCAGCAUUGUACAGGGCUAUC	14	5	1703.43	84.9708	855.287	63.7788	experimental
409	he_21320	GAGUUCUUCCUACGAUC	14	6	154.269	6.30473	36.8611	2.64207	experimental
410	he_40110	UGGGGUAUAGCUCAGUGGUAGAGCAUUUG	14	7	15288.9	230.176	12881.6	219.93	experimental
411	he_8778	AGGCUCGUUGGUCUAGGGGUAUGAUUCUC	14	8	42468.3	156.725	37650.4	695.487	experimental
412	he_26836	AUGCAGAACAUCAUGAAUGACAUGCCG	14	9	158.37	11.3521	36.7593	2.29534	experimental
413	he_52065	GCCAUAGCCCGGUCGCUGGUACAUGA	14	10	168.87	4.96547	162.713	16.3279	experimental
414	rt_chr2_B_1	UUUGAUUGUUAUUUAUUGACUUGUGUUUGUCU	14	11	161.63	10.4735	33.9259	1.65594	experimental
415	xbz_26134	AAUUUCGGUUGGGGA	14	12	158.759	8.56517	39.0556	3.36511	experimental
416	he_8862	AACUGGCCCUCAAAGUCCCGCU	14	13	588.38	38.8144	396.602	27.5375	experimental
417	xbz_9334	UCCCUUUGGAGCUGAUU	14	14	150.648	6.46098	36.8056	1.8058	experimental
418	he_29970	AGCAGCAUUGUACAGGGCUAUC	14	15	1639.69	62.9246	845.926	51.2931	experimental
419	he_21320	GAGUUCUUCCUACGAUC	14	16	147	7.77247	38.1759	4.11705	experimental
420	he_40110	UGGGGUAUAGCUCAGUGGUAGAGCAUUUG	14	17	15548.3	278.156	12460.5	216.738	experimental
421	he_8778	AGGCUCGUUGGUCUAGGGGUAUGAUUCUC	14	18	42132.7	236.899	36954.2	725.035	experimental
422	he_26836	AUGCAGAACAUCAUGAAUGACAUGCCG	14	19	149.806	7.87099	37.1204	3.13472	experimental
423	he_52065	GCCAUAGCCCGGUCGCUGGUACAUGA	14	20	153.694	10.0758	154.259	14.364	experimental
424	rt_chr9_F_1	AGCCUGCUGCUGUAGCCAAGACAGCUUGUUUU	14	21	151.231	6.98143	35.0741	2.16473	experimental
425	xbz_26134	AAUUUCGGUUGGGGA	14	22	145.991	11.5528	37.213	2.80537	experimental
426	he_8862	AACUGGCCCUCAAAGUCCCGCU	14	23	551.259	41.9288	419.991	53.6666	experimental
427	xbz_9334	UCCCUUUGGAGCUGAUU	14	24	151.935	14.9743	32.713	1.88477	experimental
428	he_29970	AGCAGCAUUGUACAGGGCUAUC	14	25	1647.42	71.5687	1001.48	57.4672	experimental
429	he_21320	GAGUUCUUCCUACGAUC	14	26	151.009	10.4206	38.25	2.51769	experimental
430	he_40110	UGGGGUAUAGCUCAGUGGUAGAGCAUUUG	14	27	15095.9	201.901	13155.4	211.547	experimental
431	he_8778	AGGCUCGUUGGUCUAGGGGUAUGAUUCUC	14	28	40970.2	264.011	39527.4	732.596	experimental
432	he_26836	AUGCAGAACAUCAUGAAUGACAUGCCG	14	29	157.454	8.46806	37.2222	2.11065	experimental
433	he_52065	GCCAUAGCCCGGUCGCUGGUACAUGA	14	30	157.685	10.2361	193.333	18.8937	experimental
434	chr2_D_1	AUUCAAAGACAAGAUUAUAUCUGCUUUUUAUU	14	31	159.889	7.26319	32.3519	2.20583	experimental
435	hsa-5S-b1		15	1	5275.41	160.153	2171.46	123.107	control	control_biosequences	LC Internal Use
436	xbz_20511	CGGAGCUGGGGAUUGUGGGU	15	2	7154.34	114.03	4705.73	126.934	experimental
437	he_21878	UGAAUGAUUAAAGGUCUUGGGGCC	15	3	441.056	39.5554	907.611	52.6073	experimental
438	xbz_8692	GUUCUACAGUCCACGGAUC	15	4	148.954	8.88807	32.2315	1.77525	experimental
439	he_53589	CAAGUCACUAGUGGUUCCGUUUAG	15	5	3991.43	92.4945	2994.66	127.847	experimental
440	he_11072	GUGGAGUGUGACAAUGGUGUUUG	15	6	179.796	8.2039	47.537	5.76717	experimental
441	he_40138	ACUGCCCUGGCGGAACGCUGAGAAGAC	15	7	12313.7	193.963	13847.8	322.802	experimental
442	he_8779	AAGCCCGGCUAGCUCAGUCGGUAGAGCAUG	15	8	18389.6	219.797	10850	278.171	experimental
443	he_26695	AAUGGAUCUGGGUGGCCACGUGA	15	9	161.287	11.2947	36.4907	2.53755	experimental
444	he_39482	UAAGCUGCUAUGUAUGGAUUUAAACCGU	15	10	156.602	7.74227	33.1944	3.11601	experimental
445	hsa-5S-b1		15	11	5642.89	115.432	2561.76	76.5057	control	control_biosequences	LC Internal Use
446	xbz_20511	CGGAGCUGGGGAUUGUGGGU	15	12	7331.4	138.454	5381.11	159.253	experimental
447	he_21878	UGAAUGAUUAAAGGUCUUGGGGCC	15	13	438.713	29.1288	1046.94	57.3763	experimental
448	xbz_8692	GUUCUACAGUCCACGGAUC	15	14	157.519	6.70121	37.5278	2.71878	experimental
449	he_53589	CAAGUCACUAGUGGUUCCGUUUAG	15	15	3954.4	104.823	2864.63	109.696	experimental
450	he_11072	GUGGAGUGUGACAAUGGUGUUUG	15	16	165.111	10.3304	46.0741	4.27709	experimental
451	he_40138	ACUGCCCUGGCGGAACGCUGAGAAGAC	15	17	12471.5	140.613	12907.2	204.264	experimental
452	he_8779	AAGCCCGGCUAGCUCAGUCGGUAGAGCAUG	15	18	18197.8	221.72	10017.7	157.179	experimental
453	he_26695	AAUGGAUCUGGGUGGCCACGUGA	15	19	141.111	10.0125	35.2593	2.62757	experimental
454	he_39482	UAAGCUGCUAUGUAUGGAUUUAAACCGU	15	20	141.685	7.29184	35.2222	2.96185	experimental
455	hsa-5S-b1		15	21	5349.7	108.087	2459.62	112.12	control	control_biosequences	LC Internal Use
456	xbz_20511	CGGAGCUGGGGAUUGUGGGU	15	22	7273.45	108.649	5760.15	158.95	experimental
457	he_21878	UGAAUGAUUAAAGGUCUUGGGGCC	15	23	425.833	22.2792	1178.91	40.7884	experimental
458	xbz_8692	GUUCUACAGUCCACGGAUC	15	24	147.648	6.56857	33.2963	2.92031	experimental
459	he_53589	CAAGUCACUAGUGGUUCCGUUUAG	15	25	3972.31	81.0187	3352.07	125.023	experimental
460	he_11072	GUGGAGUGUGACAAUGGUGUUUG	15	26	183.12	11.6609	46.3796	3.64991	experimental
461	he_40138	ACUGCCCUGGCGGAACGCUGAGAAGAC	15	27	12112.2	169.724	13638.4	208.669	experimental
462	he_8779	AAGCCCGGCUAGCUCAGUCGGUAGAGCAUG	15	28	17789.2	212.658	10386	233.226	experimental
463	he_26695	AAUGGAUCUGGGUGGCCACGUGA	15	29	153.019	10.9126	37.0833	2.77548	experimental
464	he_39482	UAAGCUGCUAUGUAUGGAUUUAAACCGU	15	30	157.741	7.92886	33.5648	2.10595	experimental
465	hsa-5S-b1		15	31	5302.41	106.535	2691.88	112.362	control	control_biosequences	LC Internal Use
466	hsa-5S-b2		16	1	17503.6	323.61	6920.31	148.976	control	control_biosequences	LC Internal Use
467	xbz_19786	AAAAAUUUCUGUUGGGUA	16	2	152.759	8.3452	33.4259	2.96145	experimental
468	he_9903	UGGGUCUUUGCGGGCGAGAUGA	16	3	311.454	21.3578	182.954	22.9882	experimental
469	xbz_9202	ACCAAUAUUACUGUGCUGCUUU	16	4	210.463	10.1017	41.4167	7.08839	experimental
470	he_27500	AUGGGUGAAUUUGUAGAAGGAU	16	5	159.769	9.86318	36.5278	3.4	experimental
471	he_6383	AGAAAUGAUGUUAUUCUGAAA	16	6	162.519	8.97502	37.2407	2.00872	experimental
472	he_40142	ACUUCUUAGAGGGACAAGUGGCGUUC	16	7	5766	122.768	49744.8	816.319	experimental
473	he_8797	GUGACUGAGUCUUAAGCAAUGAUGCG	16	8	157.88	6.95072	37.7037	3.37461	experimental
474	he_43902	UGGAAAUGAUGAAAUAGAGA	16	9	155.111	8.02488	33.1574	1.55979	experimental
475	he_52106	GCCCAGCUAGCUCAGUCGGUAGAGGAUA	16	10	5649.26	124.222	4557	105.488	experimental
476	hsa-5S-b2		16	11	18430.2	188.252	8127.53	175.53	control	control_biosequences	LC Internal Use
477	xbz_19786	AAAAAUUUCUGUUGGGUA	16	12	152.917	6.97408	34.6481	1.42943	experimental
478	he_9903	UGGGUCUUUGCGGGCGAGAUGA	16	13	341.324	27.3355	234.241	15.4925	experimental
479	xbz_9202	ACCAAUAUUACUGUGCUGCUUU	16	14	211.083	12.9161	40.8333	2.94973	experimental
480	he_27500	AUGGGUGAAUUUGUAGAAGGAU	16	15	152.694	7.67988	34.5926	2.41892	experimental
481	he_6383	AGAAAUGAUGUUAUUCUGAAA	16	16	143.759	6.62179	36.3704	3.90205	experimental
482	he_40142	ACUUCUUAGAGGGACAAGUGGCGUUC	16	17	5942.51	109.279	48021	442.011	experimental
483	he_8797	GUGACUGAGUCUUAAGCAAUGAUGCG	16	18	151.157	11.2459	38.9722	2.73932	experimental
484	he_43902	UGGAAAUGAUGAAAUAGAGA	16	19	137.731	8.8841	35.2037	2.22038	experimental
485	he_52106	GCCCAGCUAGCUCAGUCGGUAGAGGAUA	16	20	5453.73	161.102	4289.9	129.767	experimental
486	hsa-5S-b2		16	21	18303.9	151.647	7935.16	125.433	control	control_biosequences	LC Internal Use
487	xbz_19786	AAAAAUUUCUGUUGGGUA	16	22	146.481	7.26595	34.8519	2.15222	experimental
488	he_9903	UGGGUCUUUGCGGGCGAGAUGA	16	23	339.954	33.3748	233.722	27.1589	experimental
489	xbz_9202	ACCAAUAUUACUGUGCUGCUUU	16	24	204.62	9.85191	41.5185	7.56589	experimental
490	he_27500	AUGGGUGAAUUUGUAGAAGGAU	16	25	148.815	3.63819	38.8148	2.78228	experimental
491	he_6383	AGAAAUGAUGUUAUUCUGAAA	16	26	156.787	8.79045	36.6667	3.37667	experimental
492	he_40142	ACUUCUUAGAGGGACAAGUGGCGUUC	16	27	6004.44	128.294	51046.4	514.971	experimental
493	he_8797	GUGACUGAGUCUUAAGCAAUGAUGCG	16	28	151.843	6.92707	37.5741	1.86058	experimental
494	he_43902	UGGAAAUGAUGAAAUAGAGA	16	29	150.935	8.49659	33.2315	1.88256	experimental
495	he_52106	GCCCAGCUAGCUCAGUCGGUAGAGGAUA	16	30	5395.63	154.91	4853.39	140.599	experimental
496	hsa-5S-b2		16	31	17681.8	186.773	8646.8	218.939	control	control_biosequences	LC Internal Use
497	hsa-5S-b3		17	1	7339.4	199.87	4443.02	95.9306	control	control_biosequences	LC Internal Use
498	xbz_26370	CUGGGAGAAGGCUGUUUACU	17	2	194.389	15.1521	49.287	5.65859	experimental
499	he_18321	UACUUGUUUUAGGAGUAUCUUAA	17	3	151.991	8.61589	33	2.28772	experimental
500	xbz_3740	AGGUUGGGAUCGGUUGCAAUGCU	17	4	239.759	15.3744	36.287	3.42353	experimental
501	he_44031	CUCAAACUUGUUGGAGUAGGC	17	5	157.037	7.20712	35.1481	1.3659	experimental
502	he_6833	UAAGGUGCAUCUAGUGCAGAU	17	6	318.639	25.4218	83.5185	9.97987	experimental
503	he_40162	GAGAGGUGUAGAAUAAGUGGGAGGUCCCC	17	7	10084	126.422	27239.6	539.18	experimental
504	he_9047	CUUUAACGAAGAUCCAUUGGAGGGCA	17	8	901.204	26.8467	1428.04	75.9032	experimental
505	he_29981	AAUUUUUAAUGCAGAAGUUUGAAUGAAG	17	9	159.176	9.67976	34.6111	2.31546	experimental
506	he_42318	ACUGUGUGCUGAUUGUCACGUUCUGAUU	17	10	164.491	8.09464	659.472	55.4183	experimental
507	hsa-5S-b3		17	11	7704.74	67.3366	5289.68	94.9572	control	control_biosequences	LC Internal Use
508	xbz_26370	CUGGGAGAAGGCUGUUUACU	17	12	202.704	6.85533	52.9444	4.66611	experimental
509	he_18321	UACUUGUUUUAGGAGUAUCUUAA	17	13	159.583	10.8215	33.4444	1.54275	experimental
510	xbz_3740	AGGUUGGGAUCGGUUGCAAUGCU	17	14	230.759	13.5914	43.5093	3.87297	experimental
511	he_44031	CUCAAACUUGUUGGAGUAGGC	17	15	149.009	9.44981	34.9259	2.17335	experimental
512	he_6833	UAAGGUGCAUCUAGUGCAGAU	17	16	302.009	23.6558	74.5093	10.8227	experimental
513	he_40162	GAGAGGUGUAGAAUAAGUGGGAGGUCCCC	17	17	9985.04	158.51	24837.3	223.599	experimental
514	he_9047	CUUUAACGAAGAUCCAUUGGAGGGCA	17	18	874.75	46.6575	1230.74	55.4641	experimental
515	he_29981	AAUUUUUAAUGCAGAAGUUUGAAUGAAG	17	19	146.028	8.30995	33.8426	1.88532	experimental
516	he_42318	ACUGUGUGCUGAUUGUCACGUUCUGAUU	17	20	158.278	12.3287	541.833	29.3393	experimental
517	hsa-5S-b3		17	21	7476.73	111.587	4994.58	199.268	control	control_biosequences	LC Internal Use
518	xbz_26370	CUGGGAGAAGGCUGUUUACU	17	22	186.185	13.3221	50.8333	7.65555	experimental
519	he_18321	UACUUGUUUUAGGAGUAUCUUAA	17	23	148.796	8.52129	33.4444	2.00156	experimental
520	xbz_3740	AGGUUGGGAUCGGUUGCAAUGCU	17	24	240.898	16.834	40.2315	3.85389	experimental
521	he_44031	CUCAAACUUGUUGGAGUAGGC	17	25	159.944	6.83836	38.963	2.94474	experimental
522	he_6833	UAAGGUGCAUCUAGUGCAGAU	17	26	313.074	17.656	81.4352	8.03645	experimental
523	he_40162	GAGAGGUGUAGAAUAAGUGGGAGGUCCCC	17	27	9766.4	129.999	26334	339.239	experimental
524	he_9047	CUUUAACGAAGAUCCAUUGGAGGGCA	17	28	875.806	41.3104	1342.31	48.8187	experimental
525	he_29981	AAUUUUUAAUGCAGAAGUUUGAAUGAAG	17	29	153.157	7.69775	34.1944	2.15935	experimental
526	he_42318	ACUGUGUGCUGAUUGUCACGUUCUGAUU	17	30	159.778	6.07328	694.491	51.9933	experimental
527	hsa-5S-b3		17	31	7327.55	152.96	5642.19	156.851	control	control_biosequences	LC Internal Use
528	hsa-5S-b4		18	1	4208.77	147.682	1634.27	126.055	control	control_biosequences	LC Internal Use
529	xbz_23536	UGAGGUAGUAGUUUGUACAGUU	18	2	5748.22	154.659	4095.43	154.55	experimental
530	he_25083	AGAGGUAGUAGGUUGCAUAGUU	18	3	16528.8	256.084	22881.6	213.406	experimental
531	xbz_11034	UGAGAACUGAAUUCCAUGGGUU	18	4	158.407	10.4614	36.5463	4.0887	experimental
532	he_52217	CAAUUUAGUGUGUGUGAUAUU	18	5	155.454	10.9437	38.0648	2.50709	experimental
533	he_23269	UUUUUCAUUAUUGCUCCUGACC	18	6	165.546	8.75031	36.287	2.30015	experimental
534	he_40174	CUGACGUGGAGCCAGGCGUGGAAUGCG	18	7	730.407	29.7626	2603.15	96.4384	experimental
535	he_9053	CUAGAGGUGAAAUUCUUGGACCGGCG	18	8	561.472	25.1959	463.435	18.082	experimental
536	he_28411	UUAGAGAUUUUGGAGGAGUAAA	18	9	157.315	10.5641	36.8796	2.00801	experimental
537	he_36935	GGGCUGUGAUGUUUAUUAGCUUCUGAGCUC	18	10	155.046	8.09452	42.6204	4.71767	experimental
538	hsa-5S-b4		18	11	4438.69	93.5294	1945.5	63.0947	control	control_biosequences	LC Internal Use
539	xbz_23536	UGAGGUAGUAGUUUGUACAGUU	18	12	6123.83	119.848	4909	140.234	experimental
540	he_25083	AGAGGUAGUAGGUUGCAUAGUU	18	13	16858.8	173.131	24739.8	511.929	experimental
541	xbz_11034	UGAGAACUGAAUUCCAUGGGUU	18	14	162.787	7.37266	39.4722	3.59766	experimental
542	he_52217	CAAUUUAGUGUGUGUGAUAUU	18	15	155.083	10.7817	35.5833	2.82884	experimental
543	he_23269	UUUUUCAUUAUUGCUCCUGACC	18	16	150.009	9.19518	35.75	3.53388	experimental
544	he_40174	CUGACGUGGAGCCAGGCGUGGAAUGCG	18	17	723.278	53.3305	2395.7	91.358	experimental
545	he_9053	CUAGAGGUGAAAUUCUUGGACCGGCG	18	18	516.574	32.2462	449.954	37.3264	experimental
546	he_28411	UUAGAGAUUUUGGAGGAGUAAA	18	19	150.741	8.06906	33.2778	1.83849	experimental
547	he_36935	GGGCUGUGAUGUUUAUUAGCUUCUGAGCUC	18	20	145.194	12.6598	40.7778	3.44336	experimental
548	hsa-5S-b4		18	21	4509.31	111.8	1836.74	52.1058	control	control_biosequences	LC Internal Use
549	xbz_23536	UGAGGUAGUAGUUUGUACAGUU	18	22	6023.6	132.616	4909.04	177.614	experimental
550	he_25083	AGAGGUAGUAGGUUGCAUAGUU	18	23	16386.7	144.466	26303.9	444.433	experimental
551	xbz_11034	UGAGAACUGAAUUCCAUGGGUU	18	24	156.019	10.9126	35.0556	2.87377	experimental
552	he_52217	CAAUUUAGUGUGUGUGAUAUU	18	25	159.556	5.93947	39.3519	2.66972	experimental
553	he_23269	UUUUUCAUUAUUGCUCCUGACC	18	26	157.787	12.2177	36.1759	3.32318	experimental
554	he_40174	CUGACGUGGAGCCAGGCGUGGAAUGCG	18	27	754.093	48.0744	2704.26	92.1248	experimental
555	he_9053	CUAGAGGUGAAAUUCUUGGACCGGCG	18	28	521.019	21.3883	463.667	37.7181	experimental
556	he_28411	UUAGAGAUUUUGGAGGAGUAAA	18	29	147.861	9.2912	34.6944	2.17659	experimental
557	he_36935	GGGCUGUGAUGUUUAUUAGCUUCUGAGCUC	18	30	151.565	9.40598	42.537	4.03125	experimental
558	hsa-5S-b4		18	31	4353.33	111.462	2164.72	76.8919	control	control_biosequences	LC Internal Use
559	hsa-5S-b5		19	1	15028.8	161.542	6974.58	202.665	control	control_biosequences	LC Internal Use
560	xbz_23920	GGUGGGAAAGCAGGACUU	19	2	157.352	12.4633	38.4815	4.18605	experimental
561	he_20271	GCGCCCAGGGCGCACCACCGGCCCG	19	3	332.611	10.5784	710.963	31.907	experimental
562	xbz_3731	CAAAGUGCUUACAGUGCAGGUAG	19	4	4988.69	153.87	2704.52	94.7554	experimental
563	he_49813	UAUGGCACUGGUAGAAUUCACUG	19	5	2488.52	82.9162	1999.71	118.898	experimental
564	he_25080	UGAGGUAGUAGGUUGUAUAGUUUU	19	6	18391.1	186.046	27564.6	489.213	experimental
565	he_40343	AAGCAUUGGUGGUUCAGUGGUAGAAUUC	19	7	36245.2	272.622	40818.2	840.384	experimental
566	he_9090	AGGUGGAGCACCAGGGCACGUGUUAG	19	8	363.472	18.6234	1301.58	51.656	experimental
567	he_48746	GUUGUCUGCUAGAUCAUGGUUUG	19	9	158.778	5.79773	37.4444	2.76268	experimental
568	he_32697	UUUUUGGCCAAGGGUAUCUUAAACAA	19	10	165.685	9.447	33.9907	1.96937	experimental
569	hsa-5S-b5		19	11	15735.6	253.674	8278.19	142.325	control	control_biosequences	LC Internal Use
570	xbz_23920	GGUGGGAAAGCAGGACUU	19	12	157.861	6.99994	37.5556	2.86237	experimental
571	he_20271	GCGCCCAGGGCGCACCACCGGCCCG	19	13	379.148	16.7889	778.315	42.5023	experimental
572	xbz_3731	CAAAGUGCUUACAGUGCAGGUAG	19	14	5223.76	90.6246	2870.99	76.4395	experimental
573	he_49813	UAUGGCACUGGUAGAAUUCACUG	19	15	2430.69	84.6285	1903.94	111.097	experimental
574	he_25080	UGAGGUAGUAGGUUGUAUAGUUUU	19	16	18042.5	251.621	26028.8	304.021	experimental
575	he_40343	AAGCAUUGGUGGUUCAGUGGUAGAAUUC	19	17	35185.3	219.647	37461	257.225	experimental
576	he_9090	AGGUGGAGCACCAGGGCACGUGUUAG	19	18	354.454	17.5352	1198.65	80.8414	experimental
577	he_48746	GUUGUCUGCUAGAUCAUGGUUUG	19	19	144.204	9.04584	36.1111	2.61674	experimental
578	he_32697	UUUUUGGCCAAGGGUAUCUUAAACAA	19	20	149.167	7.49517	36.213	2.97984	experimental
579	hsa-5S-b5		19	21	15401.6	129.867	7688.69	199.762	control	control_biosequences	LC Internal Use
580	xbz_23920	GGUGGGAAAGCAGGACUU	19	22	154.528	8.96667	36.9444	2.95712	experimental
581	he_20271	GCGCCCAGGGCGCACCACCGGCCCG	19	23	348.352	25.0242	763.259	57.0074	experimental
582	xbz_3731	CAAAGUGCUUACAGUGCAGGUAG	19	24	5041.92	122.722	3014.31	119.595	experimental
583	he_49813	UAUGGCACUGGUAGAAUUCACUG	19	25	2430.88	84.4279	2134.5	73.8025	experimental
584	he_25080	UGAGGUAGUAGGUUGUAUAGUUUU	19	26	17894.4	212.843	28127	392.966	experimental
585	he_40343	AAGCAUUGGUGGUUCAGUGGUAGAAUUC	19	27	34417.3	194.543	40206.4	325.035	experimental
586	he_9090	AGGUGGAGCACCAGGGCACGUGUUAG	19	28	374.065	24.9074	1291.31	61.3678	experimental
587	he_48746	GUUGUCUGCUAGAUCAUGGUUUG	19	29	148.574	9.76471	36.037	2.1527	experimental
588	he_32697	UUUUUGGCCAAGGGUAUCUUAAACAA	19	30	156.759	6.04171	33.6389	3.05543	experimental
589	hsa-5S-b5		19	31	14937.9	159.324	8513.97	195.864	control	control_biosequences	LC Internal Use
590	hsa-5S-b6		20	1	25200.8	176.433	22431.8	325.297	control	control_biosequences	LC Internal Use
591	xbz_20219	GUUUCUCAUAUCAUUGGUCGUGG	20	2	228.935	13.1613	72.9074	9.64078	experimental
592	he_2066	CAUAACUUGACCUCUCUGACUA	20	3	394.954	27.9239	42.2685	4.81743	experimental
593	xbz_13910	ACCACUGACCGUUGACUGUAC	20	4	228.352	16.4983	44.8796	5.12775	experimental
594	he_30405	CUGUGCGUGUGACAGCGGCUGA	20	5	385.167	26.6077	734.111	43.3702	experimental
595	he_12204	UGAGGUAGGAGGUUGUAUAGUU	20	6	11570.9	130.875	15622.8	304.297	experimental
596	he_40709	GGGGGUAUAGCUUAGUGGUAGAGUAUUUG	20	7	7414.6	140.135	4258.69	190.439	experimental
597	he_9463	AUCGCUGUACGGCCUUGAUGAAAGCA	20	8	284.917	13.4207	16916.7	367.153	experimental
598	he_39410	UGAUUUGUCUGGAGGAAUGAUU	20	9	158.648	7.0926	36.7315	1.53225	experimental
599	he_51658	AUUGGUACUGAAAAGAGACGUAGUAAAU	20	10	154.167	9.88958	34.4352	1.76293	experimental
600	hsa-5S-b6		20	11	25914.7	210.19	25662.7	517.917	control	control_biosequences	LC Internal Use
601	xbz_20219	GUUUCUCAUAUCAUUGGUCGUGG	20	12	259.769	18.8117	90.5741	7.80511	experimental
602	he_2066	CAUAACUUGACCUCUCUGACUA	20	13	555.287	28.0877	49.1019	4.35555	experimental
603	xbz_13910	ACCACUGACCGUUGACUGUAC	20	14	226.074	15.1323	47.5	4.83851	experimental
604	he_30405	CUGUGCGUGUGACAGCGGCUGA	20	15	381.815	28.6983	769.972	59.9737	experimental
605	he_12204	UGAGGUAGGAGGUUGUAUAGUU	20	16	11758.1	247.447	15285	383.156	experimental
606	he_40709	GGGGGUAUAGCUUAGUGGUAGAGUAUUUG	20	17	8577.94	142.015	4645.39	165.64	experimental
607	he_9463	AUCGCUGUACGGCCUUGAUGAAAGCA	20	18	275.546	16.1687	14793.1	236.105	experimental
608	he_39410	UGAUUUGUCUGGAGGAAUGAUU	20	19	147.731	8.67115	35.6667	2.46091	experimental
609	he_51658	AUUGGUACUGAAAAGAGACGUAGUAAAU	20	20	150.241	5.84355	36.5463	2.99652	experimental
610	hsa-5S-b6		20	21	24918.2	166.713	24206.6	419.619	control	control_biosequences	LC Internal Use
611	xbz_20219	GUUUCUCAUAUCAUUGGUCGUGG	20	22	269.833	20.3949	111.296	16.5209	experimental
612	he_2066	CAUAACUUGACCUCUCUGACUA	20	23	709.491	45.7573	53.4907	7.81742	experimental
613	xbz_13910	ACCACUGACCGUUGACUGUAC	20	24	229.111	21.617	47.0556	8.02197	experimental
614	he_30405	CUGUGCGUGUGACAGCGGCUGA	20	25	386.63	13.9321	946.083	42.0563	experimental
615	he_12204	UGAGGUAGGAGGUUGUAUAGUU	20	26	11817.8	183.21	17233.1	413.094	experimental
616	he_40709	GGGGGUAUAGCUUAGUGGUAGAGUAUUUG	20	27	8364.42	116.924	5055.19	112.58	experimental
617	he_9463	AUCGCUGUACGGCCUUGAUGAAAGCA	20	28	286.028	15.8571	15372.1	206.637	experimental
618	he_39410	UGAUUUGUCUGGAGGAAUGAUU	20	29	145.417	3.502	33.9815	3.5176	experimental
619	he_51658	AUUGGUACUGAAAAGAGACGUAGUAAAU	20	30	159.13	7.4421	35.2407	2.0456	experimental
620	hsa-5S-b6		20	31	24432.6	214.227	27184.9	345.248	control	control_biosequences	LC Internal Use
621	TU4	UCUGACAAAUGAACAAGUCAUUCUAUUUACUG	21	1	152.861	9.06617	32.6852	2.38628	experimental
622	xbz_27158	UAAGAUGGUAGCCAUCAUUA	21	2	157.676	12.6726	33.1111	2.21437	experimental
623	he_5727	UGAGGUAGUAGUUUGUGCUGUU	21	3	7434.27	113.54	6507.31	122.985	experimental
624	xbz_11720	AGCAGAGUAGAGCAGUUGGAAGA	21	4	8350.9	157.614	11399.5	281.517	experimental
625	he_28827	UAGCACCAUUUGAAAUCAGUGUUU	21	5	189.778	13.344	52.0741	5.30509	experimental
626	he_26153	UGUCAGUUUGUCAAAUACCCCA	21	6	167.324	9.83493	36.8981	2.37566	experimental
627	he_40719	CAAUGGUGGUUCAGUGGUAGAAUUCUC	21	7	35401.1	238.951	40325.9	873.727	experimental
628	he_9626	CCAUAUGAUGUGACCUUACUCAACUGAUU	21	8	161.861	6.50587	55.6944	7.01728	experimental
629	he_46082	UUACAGUUGUUCAACCAGUUACU	21	9	354.139	33.9355	63.4815	7.86032	experimental
630	he_37784	AAACAGUUGUAAAAUAAUGAAGGUAG	21	10	159.12	5.79029	34.4444	2.34155	experimental
631	TU4	UCUGACAAAUGAACAAGUCAUUCUAUUUACUG	21	11	157.491	7.77907	35.9815	1.92854	experimental
632	xbz_27158	UAAGAUGGUAGCCAUCAUUA	21	12	156.898	7.95776	33.7593	3.38736	experimental
633	he_5727	UGAGGUAGUAGUUUGUGCUGUU	21	13	7628.6	129.437	7095.4	118.274	experimental
634	xbz_11720	AGCAGAGUAGAGCAGUUGGAAGA	21	14	8473.74	84.7924	12068.6	248.392	experimental
635	he_28827	UAGCACCAUUUGAAAUCAGUGUUU	21	15	179.565	15.4794	50.5185	4.4459	experimental
636	he_26153	UGUCAGUUUGUCAAAUACCCCA	21	16	154.602	9.39471	37.4444	2.20591	experimental
637	he_40719	CAAUGGUGGUUCAGUGGUAGAAUUCUC	21	17	34472.8	205.093	36839.5	384.78	experimental
638	he_9626	CCAUAUGAUGUGACCUUACUCAACUGAUU	21	18	141.065	6.99569	50.6389	4.66936	experimental
639	he_46082	UUACAGUUGUUCAACCAGUUACU	21	19	355.472	33.3213	71.6667	8.94427	experimental
640	he_37784	AAACAGUUGUAAAAUAAUGAAGGUAG	21	20	142.222	8.80137	35.4444	1.66511	experimental
641	rt_chr1_C_1	AUUUAGGAUCCAAACCCAGGUUGUCAUGGCGG	21	21	176.074	11.4383	61.287	6.19625	experimental
642	xbz_27158	UAAGAUGGUAGCCAUCAUUA	21	22	148.315	5.95568	34.5926	2.56153	experimental
643	he_5727	UGAGGUAGUAGUUUGUGCUGUU	21	23	7386.93	111.085	6779.19	190.169	experimental
644	xbz_11720	AGCAGAGUAGAGCAGUUGGAAGA	21	24	8327.61	143.502	12445.9	250.006	experimental
645	he_28827	UAGCACCAUUUGAAAUCAGUGUUU	21	25	188.88	9.66806	63.2037	7.86541	experimental
646	he_26153	UGUCAGUUUGUCAAAUACCCCA	21	26	159.546	10.3123	38.8796	3.03475	experimental
647	he_40719	CAAUGGUGGUUCAGUGGUAGAAUUCUC	21	27	33558.2	171.123	39124.5	685.15	experimental
648	he_9626	CCAUAUGAUGUGACCUUACUCAACUGAUU	21	28	152.417	6.1555	56.2778	8.6271	experimental
649	he_46082	UUACAGUUGUUCAACCAGUUACU	21	29	355.509	20.286	74.1019	10.9134	experimental
650	he_37784	AAACAGUUGUAAAAUAAUGAAGGUAG	21	30	151.565	8.44584	32.4722	1.88679	experimental
651	TU4	UCUGACAAAUGAACAAGUCAUUCUAUUUACUG	21	31	153.306	6.96112	32.5556	1.8562	experimental
652	TU531	UUUGAAUAUCUUUCUAAAUUUUAUCUGCUACA	22	1	160.185	10.0523	31.2593	2.11965	experimental
653	xbz_26095	GUUUCCGUAGUGUAGUGGUUAUU	22	2	7676.49	189.807	3775.37	124.718	experimental
654	he_21987	AGGUUAAUCAUGAACUUGAA	22	3	152.741	8.19433	34.4907	3.01552	experimental
655	xbz_11338	UUCAAAGGUGAACGUUUU	22	4	157.75	6.7452	33.0463	2.69088	experimental
656	he_53516	CAGCAGCAAUUCAUGUUUUGA	22	5	221.898	12.543	51.4907	6.83927	experimental
657	he_10364	CAACACCAGUCGAUGGGCUGUC	22	6	167.602	10.5759	36.9907	2.02552	experimental
658	he_40953	GGUCAGUCGGUCCUGAGAGAUGGGCGAG	22	7	3087.62	122.977	12088.2	213.102	experimental
659	he_9627	UGGAAAGGAUGAAGAGCUGACUGAUGG	22	8	170.176	13.8873	206.565	16.7132	experimental
660	he_27299	GAGGCCUCUUAUUUCCUGAGGCUA	22	9	155.63	7.02811	36.7593	2.8379	experimental
661	he_41230	UAACAUGGACUGGGAUAGAUUAAAGGCA	22	10	157.935	7.47491	32.3333	2.72064	experimental
662	TU531	UUUGAAUAUCUUUCUAAAUUUUAUCUGCUACA	22	11	160.583	12.0924	34.2222	2.46217	experimental
663	xbz_26095	GUUUCCGUAGUGUAGUGGUUAUU	22	12	8160.96	206.303	4593.68	94.8634	experimental
664	he_21987	AGGUUAAUCAUGAACUUGAA	22	13	161.694	10.7959	36.3241	4.0645	experimental
665	xbz_11338	UUCAAAGGUGAACGUUUU	22	14	158.796	8.26066	35.1204	2.4254	experimental
666	he_53516	CAGCAGCAAUUCAUGUUUUGA	22	15	229.704	15.3643	50.037	7.54045	experimental
667	he_10364	CAACACCAGUCGAUGGGCUGUC	22	16	145.231	9.03431	40.6481	4.0217	experimental
668	he_40953	GGUCAGUCGGUCCUGAGAGAUGGGCGAG	22	17	2999.42	111.245	11545.1	348.617	experimental
669	he_9627	UGGAAAGGAUGAAGAGCUGACUGAUGG	22	18	155.324	8.76146	164.889	14.0109	experimental
670	he_27299	GAGGCCUCUUAUUUCCUGAGGCUA	22	19	147.222	12.0197	35.6204	1.99868	experimental
671	he_41230	UAACAUGGACUGGGAUAGAUUAAAGGCA	22	20	145.231	11.6896	34.5556	3.29069	experimental
672	rt_chr13_E_2_host	CACCUCAGCCUCCUAAAAUGCUGGGAUUACAG	22	21	159.454	7.97588	38.8148	2.67962	experimental
673	xbz_26095	GUUUCCGUAGUGUAGUGGUUAUU	22	22	8346.32	242.375	4640.86	136.016	experimental
674	he_21987	AGGUUAAUCAUGAACUUGAA	22	23	150.426	8.8415	32.9352	2.54041	experimental
675	xbz_11338	UUCAAAGGUGAACGUUUU	22	24	146.324	6.36555	34.6481	2.06128	experimental
676	he_53516	CAGCAGCAAUUCAUGUUUUGA	22	25	237.611	13.8509	59.4259	8.05496	experimental
677	he_10364	CAACACCAGUCGAUGGGCUGUC	22	26	158.148	6.36993	37.8333	3.60814	experimental
678	he_40953	GGUCAGUCGGUCCUGAGAGAUGGGCGAG	22	27	3052.89	70.6151	12692.1	201.247	experimental
679	he_9627	UGGAAAGGAUGAAGAGCUGACUGAUGG	22	28	169.093	10.501	185.472	17.7635	experimental
680	he_27299	GAGGCCUCUUAUUUCCUGAGGCUA	22	29	154.509	6.77336	38.6389	4.06825	experimental
681	he_41230	UAACAUGGACUGGGAUAGAUUAAAGGCA	22	30	156.481	8.41281	34.2315	2.48963	experimental
682	TU531	UUUGAAUAUCUUUCUAAAUUUUAUCUGCUACA	22	31	150.537	6.66758	30.9352	1.97779	experimental
683	TU540	AAGAACUAGUAAAUCCUAAGAGAGAAUUAGGA	23	1	155	7.90953	32.7963	2.54588	experimental
684	xbz_27866	AACGGGCUUGGCGGAA	23	2	3622.97	135.571	7375.54	254.612	experimental
685	he_14423	AGCAGCAUUGUACAGGGCUAUGAAA	23	3	1463.63	69.814	751.269	51.1426	experimental
686	xbz_13753	UGAGGUAGUAGGUUGUAUAGUUUU	23	4	18163.3	205.131	27108.1	581.457	experimental
687	he_33255	AGCUGUUGUGAGUCAGGCCG	23	5	164.38	10.5003	39.4259	4.36255	experimental
688	he_12052	CUGGGAUCUCCGGGGUCUUGGUU	23	6	172.417	9.50762	38.9907	2.9018	experimental
689	he_40976	UGGAUAUGAUGACUGAUUACCUGAGA	23	7	176.407	11.3574	470.824	27.0527	experimental
690	he_9634	UCCAGGGUUCAAGUCCCUGUUCGGGCGGCA	23	8	16868.3	262.363	24716.4	335.345	experimental
691	he_28961	GGUUCCAUUGUGUAAUGGUUGGCACUCUGG	23	9	9841.81	70.3763	2214	111.658	experimental
692	he_27778	AAGACCCUGGAGUUCAAAAAACUCUUG	23	10	159.269	9.0972	34.4074	2.08706	experimental
693	TU540	AAGAACUAGUAAAUCCUAAGAGAGAAUUAGGA	23	11	153.583	6.11743	33.0556	1.88369	experimental
694	xbz_27866	AACGGGCUUGGCGGAA	23	12	3801.35	80.5404	8455.46	206.721	experimental
695	he_14423	AGCAGCAUUGUACAGGGCUAUGAAA	23	13	1531.32	60.8459	765.093	37.5782	experimental
696	xbz_13753	UGAGGUAGUAGGUUGUAUAGUUUU	23	14	18477.9	219.117	28205.9	550.541	experimental
697	he_33255	AGCUGUUGUGAGUCAGGCCG	23	15	151.472	9.64846	35.2037	2.80773	experimental
698	he_12052	CUGGGAUCUCCGGGGUCUUGGUU	23	16	155.954	6.87591	38.213	3.05724	experimental
699	he_40976	UGGAUAUGAUGACUGAUUACCUGAGA	23	17	167.139	13.6645	433.917	37.282	experimental
700	he_9634	UCCAGGGUUCAAGUCCCUGUUCGGGCGGCA	23	18	16530.1	210.695	21862.6	299.66	experimental
701	he_28961	GGUUCCAUUGUGUAAUGGUUGGCACUCUGG	23	19	10117.1	191.862	2243.52	75.7907	experimental
702	he_27778	AAGACCCUGGAGUUCAAAAAACUCUUG	23	20	154.343	9.1643	35.2407	2.65763	experimental
703	rt_chr3_A_2	UCCUCACUUAAAAUCUUUGGUCCAUAAUAAAU	23	21	148.694	8.37046	34.25	2.78891	experimental
704	xbz_27866	AACGGGCUUGGCGGAA	23	22	3705.75	98.2651	7981.83	200.7	experimental
705	he_14423	AGCAGCAUUGUACAGGGCUAUGAAA	23	23	1464.14	66.4286	703.472	56.8184	experimental
706	xbz_13753	UGAGGUAGUAGGUUGUAUAGUUUU	23	24	17483.9	220.685	28134.3	507.388	experimental
707	he_33255	AGCUGUUGUGAGUCAGGCCG	23	25	153.843	8.54363	37.4907	3.21647	experimental
708	he_12052	CUGGGAUCUCCGGGGUCUUGGUU	23	26	163.361	10.6731	41.6481	3.82152	experimental
709	he_40976	UGGAUAUGAUGACUGAUUACCUGAGA	23	27	169.685	9.53268	448.565	29.9034	experimental
710	he_9634	UCCAGGGUUCAAGUCCCUGUUCGGGCGGCA	23	28	16069.9	184.752	23400.7	270.675	experimental
711	he_28961	GGUUCCAUUGUGUAAUGGUUGGCACUCUGG	23	29	10322.1	128.808	2667.59	66.4776	experimental
712	he_27778	AAGACCCUGGAGUUCAAAAAACUCUUG	23	30	157.296	11.7268	34.3426	2.97077	experimental
713	TU540	AAGAACUAGUAAAUCCUAAGAGAGAAUUAGGA	23	31	151.991	5.64444	33.787	2.3123	experimental
714	TU541	CAAGGACUUAUUUAAAAGUGUUUUCAAGUCUG	24	1	155.954	6.4957	31.7685	2.33865	experimental
715	xbz_19551	UCAAGUGAAUGAUCAGCUU	24	2	153.259	12.3511	32.4074	3.1918	experimental
716	he_14422	AGCUUCUUUACAGUGCUGCCUUGU	24	3	165.657	10.3996	39.3333	3.7166	experimental
717	xbz_1241	AUCCUGCUCACAGCGCCA	24	4	567	52.8426	83.8519	10.0919	experimental
718	he_51982	CAACAAAUCACAGUCUGCCAUA	24	5	301.593	28.013	60.3056	11.0025	experimental
719	he_9307	UACCACAGGGUAGAACCACGGAC	24	6	391.157	19.3884	109.981	8.19389	experimental
720	he_41259	ACAACCCCCACUGCUAAAUUUGACUGG	24	7	7992.76	170.6	1845.21	82.8347	experimental
721	he_9638	GCUAAGGAAGUCCUGUGCUCAGUUUU	24	8	278.213	16.4805	47.9444	5.39268	experimental
722	he_52487	UGGACUUCUAGCUGAGCCUAGUGUGGUC	24	9	183.685	7.85696	36.5185	2.16377	experimental
723	he_24730	AGGCAUUUGAAGGUGGAGAAGCUGGC	24	10	255.148	23.8989	439.12	30.5173	experimental
724	TU541	CAAGGACUUAUUUAAAAGUGUUUUCAAGUCUG	24	11	161.741	8.67844	33.0556	2.54615	experimental
725	xbz_19551	UCAAGUGAAUGAUCAGCUU	24	12	158.491	8.65917	36.287	2.44587	experimental
726	he_14422	AGCUUCUUUACAGUGCUGCCUUGU	24	13	172.019	8.74667	38.9352	4.42227	experimental
727	xbz_1241	AUCCUGCUCACAGCGCCA	24	14	582.056	43.3999	92.4352	9.59777	experimental
728	he_51982	CAACAAAUCACAGUCUGCCAUA	24	15	269.491	22.7109	55.9907	7.14404	experimental
729	he_9307	UACCACAGGGUAGAACCACGGAC	24	16	350.278	21.977	103.065	11.9417	experimental
730	he_41259	ACAACCCCCACUGCUAAAUUUGACUGG	24	17	7783.46	223.564	1572.09	144.956	experimental
731	he_9638	GCUAAGGAAGUCCUGUGCUCAGUUUU	24	18	253.157	15.9128	48.8796	8.09721	experimental
732	he_52487	UGGACUUCUAGCUGAGCCUAGUGUGGUC	24	19	170.611	11.9421	36.0185	3.4288	experimental
733	he_24730	AGGCAUUUGAAGGUGGAGAAGCUGGC	24	20	244.278	17.1507	467.139	43.4615	experimental
734	chr11_A_6	UCUCAUUUUUCCUCUCUCAGUAUGUGGUACUA	24	21	146.435	9.23754	32.5833	3.08183	experimental
735	xbz_19551	UCAAGUGAAUGAUCAGCUU	24	22	151.75	9.0967	33.75	3.06358	experimental
736	he_14422	AGCUUCUUUACAGUGCUGCCUUGU	24	23	160.306	8.72365	37.9815	4.44695	experimental
737	xbz_1241	AUCCUGCUCACAGCGCCA	24	24	554.963	30.9935	77.3981	6.75463	experimental
738	he_51982	CAACAAAUCACAGUCUGCCAUA	24	25	298.213	12.6373	68.5093	6.85292	experimental
739	he_9307	UACCACAGGGUAGAACCACGGAC	24	26	370.583	25.1337	111.926	15.4845	experimental
740	he_41259	ACAACCCCCACUGCUAAAUUUGACUGG	24	27	7525.07	177.702	1673.99	49.6749	experimental
741	he_9638	GCUAAGGAAGUCCUGUGCUCAGUUUU	24	28	259.343	14.7263	43.4815	4.61708	experimental
742	he_52487	UGGACUUCUAGCUGAGCCUAGUGUGGUC	24	29	172.648	9.0619	38.713	4.33428	experimental
743	he_24730	AGGCAUUUGAAGGUGGAGAAGCUGGC	24	30	261.713	19.3666	575.426	32.6594	experimental
744	TU541	CAAGGACUUAUUUAAAAGUGUUUUCAAGUCUG	24	31	156.731	9.65344	33.7593	3.12323	experimental
745	TU556	CACGACAGUAAACGAUGUGGUACAAAAGCACU	25	1	156.167	8.23998	31.6111	2.1523	experimental
746	xbz_24742	AAAGGAAGAAAAGCAAUGCAUGU	25	2	153.657	13.2638	32.4167	2.77884	experimental
747	he_6004	UGAGGUAGUUGUUGUCUAGUU	25	3	157.398	9.63438	32.7963	1.8228	experimental
748	xbz_12465	AAGGAAAUUGUUUAGAU	25	4	152.093	8.97716	33.7778	2.19742	experimental
749	he_28710	CUCACUGAACAAUGAAUGCAA	25	5	162.361	9.94984	34.5	2.4207	experimental
750	he_6014	UGGUUUUGUUUGGGUUUGUU	25	6	153.574	7.60989	34.4444	1.76324	experimental
751	he_41264	CACAAAGAUGAGUGGUGAAAAUCUGAUC	25	7	170.296	8.99248	146.315	17.7399	experimental
752	he_9646	GCGUUGGUGGUAUAGUGGUAAGCAUAGCU	25	8	31052.3	253	36360	562.243	experimental
753	he_31221	UCUACAGUGCACGUGUCUCCAGU	25	9	364.231	18.1322	99.9444	9.08304	experimental
754	he_26104	GGGGCUGGCUUUAGCUCAGCGGUUACUUCG	25	10	1378.85	91.6353	259.713	19.436	experimental
755	TU556	CACGACAGUAAACGAUGUGGUACAAAAGCACU	25	11	156.935	6.53284	33.7037	2.33326	experimental
756	xbz_24742	AAAGGAAGAAAAGCAAUGCAUGU	25	12	155.417	7.75094	33.9815	2.71025	experimental
757	he_6004	UGAGGUAGUUGUUGUCUAGUU	25	13	159.935	8.72131	34.1667	3.02173	experimental
758	xbz_12465	AAGGAAAUUGUUUAGAU	25	14	152.157	7.3232	34.3704	1.85751	experimental
759	he_28710	CUCACUGAACAAUGAAUGCAA	25	15	149.944	10.2764	32.3333	3.03561	experimental
760	he_6014	UGGUUUUGUUUGGGUUUGUU	25	16	152.38	7.80452	34.5926	3.15054	experimental
761	he_41264	CACAAAGAUGAGUGGUGAAAAUCUGAUC	25	17	155.417	8.27915	131.306	22.4197	experimental
762	he_9646	GCGUUGGUGGUAUAGUGGUAAGCAUAGCU	25	18	30192.2	357.126	30638.6	251.718	experimental
763	he_31221	UCUACAGUGCACGUGUCUCCAGU	25	19	352.778	25.8169	87.6296	10.0899	experimental
764	he_26104	GGGGCUGGCUUUAGCUCAGCGGUUACUUCG	25	20	1270.18	81.5283	242.065	21.483	experimental
765	chr8_B_5	AAUAGCCCCCUCACCUUUAUCAUCUUUUAAAA	25	21	161.991	6.31494	33.7037	2.87516	experimental
766	xbz_24742	AAAGGAAGAAAAGCAAUGCAUGU	25	22	148.593	12.1302	33.1019	1.71273	experimental
767	he_6004	UGAGGUAGUUGUUGUCUAGUU	25	23	150.778	9.96567	33.0556	1.95191	experimental
768	xbz_12465	AAGGAAAUUGUUUAGAU	25	24	143.065	8.97793	31.5648	3.44048	experimental
769	he_28710	CUCACUGAACAAUGAAUGCAA	25	25	148.491	8.39837	34.7222	3.62193	experimental
770	he_6014	UGGUUUUGUUUGGGUUUGUU	25	26	151.537	9.2468	35.4907	1.72662	experimental
771	he_41264	CACAAAGAUGAGUGGUGAAAAUCUGAUC	25	27	164.528	8.52973	138.843	11.3781	experimental
772	he_9646	GCGUUGGUGGUAUAGUGGUAAGCAUAGCU	25	28	29217.1	233.163	33148.1	567.246	experimental
773	he_31221	UCUACAGUGCACGUGUCUCCAGU	25	29	355.352	22.8536	99.213	9.45036	experimental
774	he_26104	GGGGCUGGCUUUAGCUCAGCGGUUACUUCG	25	30	1267	56.2666	262.426	21.5923	experimental
775	TU556	CACGACAGUAAACGAUGUGGUACAAAAGCACU	25	31	150.861	5.75587	31.2778	1.67908	experimental
776	TU558	GAAAUACCAAAUAAAAUAGAUUAUCUUAAAAG	26	1	152.204	12.1484	30.5833	2.23031	experimental
777	xbz_16624	ACUCGGCGUGGCGUCGGUCGUGG	26	2	926.963	64.1906	3150.53	147.941	experimental
778	he_9859	UGAGGGGCAGAGAGCGAGACUUU	26	3	3774.74	123.392	3617.39	165.282	experimental
779	xbz_12959	CCACCCCACGUCUCCUCUCG	26	4	199.111	12.1635	47.6389	6.32376	experimental
780	he_42327	GUUUGAUUGCUGUCGGAGCCA	26	5	167.62	5.89585	39.2963	3.6127	experimental
781	he_532	CUUUCAGUCGGAUGUUUACAGC	26	6	370.657	18.3013	93.3981	11.4483	experimental
782	he_41333	CUCCCGGAGCGGGACCGGGUCGGAGGAU	26	7	3235.74	116.213	12597.2	309.822	experimental
783	he_9721	AUAACUGACGAAGACUACUCCUGUCUGAU	26	8	188.463	5.92228	8330.01	174.709	experimental
784	he_28948	ACUGGCUAGGGAAAAUGAUUGG	26	9	164.963	9.56915	43.1204	4.02264	experimental
785	he_2031	CCUCCCACUGCUAAAUUUGACUGGCUA	26	10	9217.1	168.053	2097.66	61.0517	experimental
786	TU558	GAAAUACCAAAUAAAAUAGAUUAUCUUAAAAG	26	11	153.546	4.49378	32.8981	1.90396	experimental
787	xbz_16624	ACUCGGCGUGGCGUCGGUCGUGG	26	12	1044.37	50.6529	4031.57	208.448	experimental
788	he_9859	UGAGGGGCAGAGAGCGAGACUUU	26	13	3727.02	68.7837	3982.79	164.68	experimental
789	xbz_12959	CCACCCCACGUCUCCUCUCG	26	14	201.833	8.1979	50.3519	7.9488	experimental
790	he_42327	GUUUGAUUGCUGUCGGAGCCA	26	15	153.602	6.37891	40.4444	4.29808	experimental
791	he_532	CUUUCAGUCGGAUGUUUACAGC	26	16	388.556	28.3365	101.194	13.0395	experimental
792	he_41333	CUCCCGGAGCGGGACCGGGUCGGAGGAU	26	17	3231.66	124.646	12249.3	236.53	experimental
793	he_9721	AUAACUGACGAAGACUACUCCUGUCUGAU	26	18	175.824	8.67032	7540.67	182.95	experimental
794	he_28948	ACUGGCUAGGGAAAAUGAUUGG	26	19	149.148	7.86666	39.4444	5.06285	experimental
795	he_2031	CCUCCCACUGCUAAAUUUGACUGGCUA	26	20	8759.9	146.792	1786.89	78.6531	experimental
796	chr12_D_5	UUUUAUGGUAUUUUGCUGAGAGCAGUGAACAA	26	21	148.722	8.93992	34.5093	3.73289	experimental
797	xbz_16624	ACUCGGCGUGGCGUCGGUCGUGG	26	22	1070.47	53.6608	4512.49	256.118	experimental
798	he_9859	UGAGGGGCAGAGAGCGAGACUUU	26	23	3642.08	159.777	3738.53	119.402	experimental
799	xbz_12959	CCACCCCACGUCUCCUCUCG	26	24	196.306	9.31129	45.9352	5.56571	experimental
800	he_42327	GUUUGAUUGCUGUCGGAGCCA	26	25	162.435	9.18783	42.0278	6.93826	experimental
801	he_532	CUUUCAGUCGGAUGUUUACAGC	26	26	385.111	36.1454	116	14.5384	experimental
802	he_41333	CUCCCGGAGCGGGACCGGGUCGGAGGAU	26	27	3457.81	139.76	14279.4	407.837	experimental
803	he_9721	AUAACUGACGAAGACUACUCCUGUCUGAU	26	28	181.731	14.6496	7797.69	200.745	experimental
804	he_28948	ACUGGCUAGGGAAAAUGAUUGG	26	29	168.019	10.7486	39.1852	2.78228	experimental
805	he_2031	CCUCCCACUGCUAAAUUUGACUGGCUA	26	30	8718.56	138.202	1944.13	88.0824	experimental
806	TU558	GAAAUACCAAAUAAAAUAGAUUAUCUUAAAAG	26	31	149.435	8.13585	31.7315	1.73801	experimental
807	TU583	UCCUUACCACACCGUGGACGAGAUCAACCUUA	27	1	152.38	8.87895	29.5833	1.84505	experimental
808	xbz_25639	UUAGACGGGCUCACAA	27	2	9614.31	237.215	3962.06	151.732	experimental
809	he_9860	AGCUCGGUCUGAGGCCCCUCAGU	27	3	778.556	68.1136	209.981	29.9379	experimental
810	xbz_3737	UAAAGUGCUUAUAGUGCAGGUAG	27	4	4936.41	144.322	2717.44	114.211	experimental
811	he_51342	UGUAAACAUCCUACACUCAGCU	27	5	8807.19	232.956	6027.4	249.001	experimental
812	he_15398	CAGUGCAAUGAUGAAAGGGCAU	27	6	421.472	33.2415	167.231	22.2646	experimental
813	he_41343	GAGACGAGACGCGCCCCUCCCACGCGG	27	7	190.167	11.324	60.7222	7.85004	experimental
814	he_9772	CAGUUGAACAUGGGUCAGUCGGUCCU	27	8	1350.65	40.3117	2288.06	82.068	experimental
815	he_32438	UCGUCAUGAGACAGUUCGGUC	27	9	166.546	8.31437	35.5648	2.47331	experimental
816	he_16903	CAAGAAGAUGAUAGAGGGUUUCUGAUU	27	10	163.5	5.53409	32.7407	1.87143	experimental
817	TU583	UCCUUACCACACCGUGGACGAGAUCAACCUUA	27	11	160.917	12.1295	33.3148	1.82223	experimental
818	xbz_25639	UUAGACGGGCUCACAA	27	12	9904.87	120.884	4349.63	150.919	experimental
819	he_9860	AGCUCGGUCUGAGGCCCCUCAGU	27	13	797.417	48.7533	246.694	20.7898	experimental
820	xbz_3737	UAAAGUGCUUAUAGUGCAGGUAG	27	14	5004.62	69.6954	2768.42	129.669	experimental
821	he_51342	UGUAAACAUCCUACACUCAGCU	27	15	8864.09	164.246	6184.39	217.591	experimental
822	he_15398	CAGUGCAAUGAUGAAAGGGCAU	27	16	394.546	24.629	157.963	15.2039	experimental
823	he_41343	GAGACGAGACGCGCCCCUCCCACGCGG	27	17	172.62	19.336	58.713	6.01097	experimental
824	he_9772	CAGUUGAACAUGGGUCAGUCGGUCCU	27	18	1187.06	88.9352	1959.14	89.5593	experimental
825	he_32438	UCGUCAUGAGACAGUUCGGUC	27	19	147.685	7.85458	34.463	2.58835	experimental
826	he_16903	CAAGAAGAUGAUAGAGGGUUUCUGAUU	27	20	150.963	5.62193	34.6852	2.1688	experimental
827	rt_chr1_C_1_host	UUCCAGUAUUUCAAUUGGUCUCCUCCCCUCAU	27	21	156.861	9.31029	32.6111	2.02707	experimental
828	xbz_25639	UUAGACGGGCUCACAA	27	22	9529.88	185.87	4019.36	134.863	experimental
829	he_9860	AGCUCGGUCUGAGGCCCCUCAGU	27	23	742.333	48.0475	268.352	29.8996	experimental
830	xbz_3737	UAAAGUGCUUAUAGUGCAGGUAG	27	24	4754.55	123.655	2536.75	98.3339	experimental
831	he_51342	UGUAAACAUCCUACACUCAGCU	27	25	8534.69	160.178	6215.97	182.213	experimental
832	he_15398	CAGUGCAAUGAUGAAAGGGCAU	27	26	404.102	22.3978	175.435	22.0803	experimental
833	he_41343	GAGACGAGACGCGCCCCUCCCACGCGG	27	27	179.213	10.88	57.4259	6.65042	experimental
834	he_9772	CAGUUGAACAUGGGUCAGUCGGUCCU	27	28	1278.11	65.7884	2157.95	66.8893	experimental
835	he_32438	UCGUCAUGAGACAGUUCGGUC	27	29	154.315	6.86675	34.5278	2.40505	experimental
836	he_16903	CAAGAAGAUGAUAGAGGGUUUCUGAUU	27	30	154.611	10.1759	34.2685	3.46034	experimental
837	TU583	UCCUUACCACACCGUGGACGAGAUCAACCUUA	27	31	157.167	7.93372	32.0278	2.52634	experimental
838	TU589	AUGACCUAGUAGAGCUCACCAGAUCUGGCCCC	28	1	170.954	9.22145	36.2685	3.6624	experimental
839	xbz_28039	GAUGAUAGUGGUGUUCAUGU	28	2	158.75	10.2411	33.1574	3.42384	experimental
840	he_17443	ACCUUCUUGUAUAAGCACUG	28	3	151.278	6.49634	33.1667	3.06167	experimental
841	xbz_9572	CACGCUCAUGCACACACCCACA	28	4	835	53.0306	425.787	40.4253	experimental
842	he_30220	UUGGGGAAACGGCCGCUGAGUGA	28	5	222.889	21.3792	78.9074	10.7169	experimental
843	xbz_15625	ACCCUGUGGUCUAGUGGUUAGGAGUUGG	28	6	28966.9	1022.62	24337.5	834.636	experimental
844	he_41514	UCCCUGUAUUCGAAAGUGAUCGUGGGCUG	28	7	165.389	8.15485	46.5741	3.45384	experimental
845	he_9775	GACCUCGUGGCGCAAUGGUAGCGCGUCUG	28	8	2773.71	99.492	728.583	45.6765	experimental
846	he_31201	UCUCAGGAGUAAAGACAGAGUU	28	9	158.574	9.96274	36.0278	3.35851	experimental
847	he_1586	GGUUGGUGGUUCGAUCCCACCCAGGGACG	28	10	7154.35	115.907	3240.08	121.482	experimental
848	TU589	AUGACCUAGUAGAGCUCACCAGAUCUGGCCCC	28	11	174.315	8.34831	43.2963	4.68894	experimental
849	xbz_28039	GAUGAUAGUGGUGUUCAUGU	28	12	162.407	9.88914	34.1019	2.01833	experimental
850	he_17443	ACCUUCUUGUAUAAGCACUG	28	13	154.259	9.46451	34.5648	1.57832	experimental
851	xbz_9572	CACGCUCAUGCACACACCCACA	28	14	835.694	48.8791	438.204	43.7163	experimental
852	he_30220	UUGGGGAAACGGCCGCUGAGUGA	28	15	207.519	12.2928	75.1944	11.8302	experimental
853	xbz_15625	ACCCUGUGGUCUAGUGGUUAGGAGUUGG	28	16	28927.3	316.431	23483.4	402.827	experimental
854	he_41514	UCCCUGUAUUCGAAAGUGAUCGUGGGCUG	28	17	153.324	7.83454	49.1944	4.54358	experimental
855	he_9775	GACCUCGUGGCGCAAUGGUAGCGCGUCUG	28	18	2849.56	106.94	663.602	75.0407	experimental
856	he_31201	UCUCAGGAGUAAAGACAGAGUU	28	19	145.963	11.9218	33.2222	2.09286	experimental
857	he_1586	GGUUGGUGGUUCGAUCCCACCCAGGGACG	28	20	6814	140.406	2766.81	71.0828	experimental
858	rt_chr16_B_7	AUGGUCUGGGGGACACUCAUUCUUUAUUUAUC	28	21	149.13	9.63938	35.0185	1.99524	experimental
859	xbz_28039	GAUGAUAGUGGUGUUCAUGU	28	22	153.444	11.261	33.787	2.70358	experimental
860	he_17443	ACCUUCUUGUAUAAGCACUG	28	23	149.481	11.3257	33.8148	2.34081	experimental
861	xbz_9572	CACGCUCAUGCACACACCCACA	28	24	812.991	72.3432	388.537	38.9616	experimental
862	he_30220	UUGGGGAAACGGCCGCUGAGUGA	28	25	210.139	12.5746	83.1019	10.4639	experimental
863	xbz_15625	ACCCUGUGGUCUAGUGGUUAGGAGUUGG	28	26	27512.4	1078.55	24123.4	1516.28	experimental
864	he_41514	UCCCUGUAUUCGAAAGUGAUCGUGGGCUG	28	27	159.972	7.00395	56.2315	6.77903	experimental
865	he_9775	GACCUCGUGGCGCAAUGGUAGCGCGUCUG	28	28	2657.72	55.3014	739.667	50.4112	experimental
866	he_31201	UCUCAGGAGUAAAGACAGAGUU	28	29	152.972	8.73007	33.25	2.52511	experimental
867	he_1586	GGUUGGUGGUUCGAUCCCACCCAGGGACG	28	30	6787.03	132.154	2898.56	123.063	experimental
868	TU589	AUGACCUAGUAGAGCUCACCAGAUCUGGCCCC	28	31	173.454	8.76845	44.9907	4.25692	experimental
869	TU56	UUCUUUGUUCCUUCUCCACUCCCACUAGCGUG	29	1	1632.25	57.9668	201.611	18.8431	experimental
870	xbz_29174	AGCUACAUCUGGCUACUGGGUCU	29	2	1862.81	89.2557	1135.39	54.9462	experimental
871	he_4179	UGAGGUAGUAGUUACAGUU	29	3	157.167	8.56803	34.2963	1.97299	experimental
872	xbz_3741	UAUUGCACUUGUCCCGGCCUGUU	29	4	10851	200.363	9942.74	233.726	experimental
873	he_30086	UGCUGGAUCAGUGGUUCGAGUC	29	5	174.861	11.1728	48.0741	5.50565	experimental
874	xbz_15847	GCGUUGGUGGUAUAGUGGUGAGGAUAGCUG	29	6	33114.7	249.558	36360.7	677.839	experimental
875	he_41519	CACCUGUAUUCGAAAGUGAUCGUGGGCUG	29	7	167.787	7.20987	52.6389	3.99406	experimental
876	he_9776	AAGGUUGCGUGUUCAAGUCACGUCGGG	29	8	5152.77	104.87	5615.14	180.422	experimental
877	he_41925	GCUACAUGAUGUGAUUAUUCUGAGAAC	29	9	160.926	6.70709	35.9167	1.40177	experimental
878	he_16289	AGCGAUGAUGAGAUAGCCAGGCUGAAG	29	10	160.537	8.13028	36.0833	4.12226	experimental
879	TU56	UUCUUUGUUCCUUCUCCACUCCCACUAGCGUG	29	11	1816.32	62.4206	221.796	19.0723	experimental
880	xbz_29174	AGCUACAUCUGGCUACUGGGUCU	29	12	1933.15	64.434	1175.15	64.6519	experimental
881	he_4179	UGAGGUAGUAGUUACAGUU	29	13	154.231	11.8784	38.6852	3.40601	experimental
882	xbz_3741	UAUUGCACUUGUCCCGGCCUGUU	29	14	10822.1	152.745	10175.1	255.508	experimental
883	he_30086	UGCUGGAUCAGUGGUUCGAGUC	29	15	165.935	8.08399	43.1481	3.64759	experimental
884	xbz_15847	GCGUUGGUGGUAUAGUGGUGAGGAUAGCUG	29	16	32478.2	249.26	33693	583.907	experimental
885	he_41519	CACCUGUAUUCGAAAGUGAUCGUGGGCUG	29	17	153.935	12.6138	50.037	5.43083	experimental
886	he_9776	AAGGUUGCGUGUUCAAGUCACGUCGGG	29	18	5220.29	102.55	5493.94	177.657	experimental
887	he_41925	GCUACAUGAUGUGAUUAUUCUGAGAAC	29	19	145.843	9.8086	34.6481	2.5184	experimental
888	he_16289	AGCGAUGAUGAGAUAGCCAGGCUGAAG	29	20	156.713	11.3542	38.5556	4.97721	experimental
889	rt_chr3_E_1	AAAGACCUGGCUUGUAAUUCUUUUAACCCCUG	29	21	154.426	8.42249	34.0463	1.75288	experimental
890	xbz_29174	AGCUACAUCUGGCUACUGGGUCU	29	22	1793.4	89.5	1013.07	84.1004	experimental
891	he_4179	UGAGGUAGUAGUUACAGUU	29	23	151.778	8.35691	35.0556	2.73377	experimental
892	xbz_3741	UAUUGCACUUGUCCCGGCCUGUU	29	24	10182.2	163.892	8816.44	201.999	experimental
893	he_30086	UGCUGGAUCAGUGGUUCGAGUC	29	25	179.213	11.446	49	5.46527	experimental
894	xbz_15847	GCGUUGGUGGUAUAGUGGUGAGGAUAGCUG	29	26	31320.4	179.33	36667.1	398.669	experimental
895	he_41519	CACCUGUAUUCGAAAGUGAUCGUGGGCUG	29	27	155.843	8.00836	55.0648	5.52187	experimental
896	he_9776	AAGGUUGCGUGUUCAAGUCACGUCGGG	29	28	5000.13	110.54	5702.2	66.1982	experimental
897	he_41925	GCUACAUGAUGUGAUUAUUCUGAGAAC	29	29	149.361	6.97185	32.5833	1.71374	experimental
898	he_16289	AGCGAUGAUGAGAUAGCCAGGCUGAAG	29	30	158.259	7.45375	32.9259	2.21593	experimental
899	TU56	UUCUUUGUUCCUUCUCCACUCCCACUAGCGUG	29	31	1719.31	55.7061	237.028	25.5732	experimental
900	TU600	UAAAUAGUAUGGCUUUGAAGAAGGCGUGGGUA	30	1	1838.69	48.9729	901.62	61.4181	experimental
901	xbz_25884	UUAUAAAGCAAUGAGACUGAUU	30	2	170.343	13.045	31.8704	2.57991	experimental
902	he_138	GGCUUGGUCUAGGGGUGUCAU	30	3	164.963	11.8637	42.4537	6.42481	experimental
903	xbz_250	UGUAAACAUCCUUGACUGGAAGCU	30	4	1237.43	86.2251	471.75	57.8852	experimental
904	he_33220	GAGGAGCCAAUGGGGCGAAGCU	30	5	1153.31	57.4449	3599.13	48.6256	experimental
905	xbz_17038	GGGGGUGUAGCUCAGUGGUAGAGCGG	30	6	23907.5	224.509	25668.4	537.772	experimental
906	he_42309	UUCAGUGAUGAGGCCUGGAAUGUGCGCUG	30	7	177.37	7.955	82.0556	10.0101	experimental
907	he_9882	CUCCCACUGCUAAAUUUGACUGGCUUU	30	8	9985.75	106.019	2266.28	103.979	experimental
908	he_29755	AUUGUGUUUAACAACAGAG	30	9	162.213	7.309	33.3796	2.50501	experimental
909	he_9637	CCCGGCCAAUGCACGAGUACAGUUUU	30	10	226.38	15.461	35.5648	2.18864	experimental
910	TU600	UAAAUAGUAUGGCUUUGAAGAAGGCGUGGGUA	30	11	1888.05	69.5796	933.074	48.3791	experimental
911	xbz_25884	UUAUAAAGCAAUGAGACUGAUU	30	12	166.491	7.2724	35.9259	2.9944	experimental
912	he_138	GGCUUGGUCUAGGGGUGUCAU	30	13	168.824	10.2061	52.0185	4.79092	experimental
913	xbz_250	UGUAAACAUCCUUGACUGGAAGCU	30	14	1268.97	69.6749	547.269	58.7172	experimental
914	he_33220	GAGGAGCCAAUGGGGCGAAGCU	30	15	1168.44	49.1586	3384.48	122.818	experimental
915	xbz_17038	GGGGGUGUAGCUCAGUGGUAGAGCGG	30	16	23808.3	183.251	24931.1	415.191	experimental
916	he_42309	UUCAGUGAUGAGGCCUGGAAUGUGCGCUG	30	17	152.231	10.9754	70.1019	7.91891	experimental
917	he_9882	CUCCCACUGCUAAAUUUGACUGGCUUU	30	18	9774.47	174.871	2110.64	81.8673	experimental
918	he_29755	AUUGUGUUUAACAACAGAG	30	19	144.704	10.5399	36.6389	2.53742	experimental
919	he_9637	CCCGGCCAAUGCACGAGUACAGUUUU	30	20	207.361	21.8275	36.0648	2.29698	experimental
920	chr11_A_7	GCUCUGCCCCACUUUCCUCACUCCAGGACUCA	30	21	160.296	10.1256	34.213	2.64063	experimental
921	xbz_25884	UUAUAAAGCAAUGAGACUGAUU	30	22	151.852	11.8415	33.3148	3.24008	experimental
922	he_138	GGCUUGGUCUAGGGGUGUCAU	30	23	155.306	11.2262	48.1389	8.04015	experimental
923	xbz_250	UGUAAACAUCCUUGACUGGAAGCU	30	24	1229.58	60.6373	507.972	36.9848	experimental
924	he_33220	GAGGAGCCAAUGGGGCGAAGCU	30	25	1159.38	53.0332	3510.57	178.355	experimental
925	xbz_17038	GGGGGUGUAGCUCAGUGGUAGAGCGG	30	26	22964.7	320.314	25941.2	596.044	experimental
926	he_42309	UUCAGUGAUGAGGCCUGGAAUGUGCGCUG	30	27	161.139	8.0192	80.0185	11.8076	experimental
927	he_9882	CUCCCACUGCUAAAUUUGACUGGCUUU	30	28	9356.33	136.234	2242.56	71.292	experimental
928	he_29755	AUUGUGUUUAACAACAGAG	30	29	148.25	9.55469	33.5741	2.02878	experimental
929	he_9637	CCCGGCCAAUGCACGAGUACAGUUUU	30	30	206.009	12.4131	38.7963	2.82432	experimental
930	TU600	UAAAUAGUAUGGCUUUGAAGAAGGCGUGGGUA	30	31	1878.89	83.4571	994.778	44.5975	experimental
931	TU605	CCAACUUGUAUUUCUUAAACACCAUUUAGGGG	31	1	153.648	7.22705	32.9352	2.02449	experimental
932	xbz_29013	CUUUGGGUGCUAAUGGUGGAGUUA	31	2	15655.4	230.832	23292	223.082	experimental
933	he_7788	AAACAUAUUUGAGACUCUUCUUA	31	3	158.444	9.47533	35.6204	1.93211	experimental
934	xbz_13762	AGAGCUUAGCUGAUUGGUGAACA	31	4	242.954	17.045	41.4815	5.08154	experimental
935	he_26755	UGGCAGUGUCUUAGCUGGUUGU	31	5	406.417	36.1115	148.778	21.2494	experimental
936	xbz_21862	CCGUGGUGGUAUAGUGGUGAGCAUAGCUG	31	6	31650.3	181.837	36618.8	710.84	experimental
937	he_42311	GUUCGUUGAUGAGGCUCAGAGUGAGCGCUG	31	7	169.833	8.79836	379.435	32.1266	experimental
938	he_10021	CUGCCAUGAUGCUAGACUCCUGAGCAGA	31	8	167.102	12.4607	37.1852	3.22996	experimental
939	he_27797	AAAUAGGGUUGAUGACAUUU	31	9	156.454	9.14717	34.1944	1.91628	experimental
940	he_10229	CAGGUCCCAUGGUGUAAUGGUUAGCACU	31	10	2620.35	93.9686	773.648	64.1676	experimental
941	TU605	CCAACUUGUAUUUCUUAAACACCAUUUAGGGG	31	11	157.602	4.75166	36.7963	3.2056	experimental
942	xbz_29013	CUUUGGGUGCUAAUGGUGGAGUUA	31	12	15972.2	137.471	25635	286.994	experimental
943	he_7788	AAACAUAUUUGAGACUCUUCUUA	31	13	156.028	2.84969	37.5833	2.87147	experimental
944	xbz_13762	AGAGCUUAGCUGAUUGGUGAACA	31	14	255.102	17.0464	46.9167	3.3853	experimental
945	he_26755	UGGCAGUGUCUUAGCUGGUUGU	31	15	379.241	28.1998	145.167	17.9024	experimental
946	xbz_21862	CCGUGGUGGUAUAGUGGUGAGCAUAGCUG	31	16	31080.9	220.665	34110.4	397.706	experimental
947	he_42311	GUUCGUUGAUGAGGCUCAGAGUGAGCGCUG	31	17	157.528	13.4689	376.861	28.9739	experimental
948	he_10021	CUGCCAUGAUGCUAGACUCCUGAGCAGA	31	18	152.796	11.6079	37.8056	2.39336	experimental
949	he_27797	AAAUAGGGUUGAUGACAUUU	31	19	147.296	9.07112	34.7037	2.01053	experimental
950	he_10229	CAGGUCCCAUGGUGUAAUGGUUAGCACU	31	20	2754.42	127.137	813	54.1966	experimental
951	chr9_B_6	AAUAUACUUGUAUUUAUUUACUAUUACCACAG	31	21	151.954	7.95241	34.3241	2.16095	experimental
952	xbz_29013	CUUUGGGUGCUAAUGGUGGAGUUA	31	22	15405.4	213.82	21534.5	356.767	experimental
953	he_7788	AAACAUAUUUGAGACUCUUCUUA	31	23	150.111	8.79075	33.1852	3.06974	experimental
954	xbz_13762	AGAGCUUAGCUGAUUGGUGAACA	31	24	232.389	12.5697	42.3426	3.80644	experimental
955	he_26755	UGGCAGUGUCUUAGCUGGUUGU	31	25	364.38	28.1444	150.731	16.0842	experimental
956	xbz_21862	CCGUGGUGGUAUAGUGGUGAGCAUAGCUG	31	26	29786.7	375.309	36195.4	603.81	experimental
957	he_42311	GUUCGUUGAUGAGGCUCAGAGUGAGCGCUG	31	27	160.019	9.47597	390.083	20.3475	experimental
958	he_10021	CUGCCAUGAUGCUAGACUCCUGAGCAGA	31	28	157.361	7.28647	35.8148	2.51035	experimental
959	he_27797	AAAUAGGGUUGAUGACAUUU	31	29	146.713	11.8677	34.8333	3.23676	experimental
960	he_10229	CAGGUCCCAUGGUGUAAUGGUUAGCACU	31	30	2917.24	79.4857	962.815	69.5755	experimental
961	TU605	CCAACUUGUAUUUCUUAAACACCAUUUAGGGG	31	31	153.676	5.77592	32.0926	2.16401	experimental
962	TU625	AUAUCUUAAACUGUAAGAUCCUGUUUCUUCAC	32	1	157.074	7.30984	30.2685	2.31455	experimental
963	xbz_19125	UGCAUAGAGCAAGAGCCUUCU	32	2	163.185	8.97468	34.5741	3.08812	experimental
964	he_597	UCUCAGUGAUGAAAACUUUGUC	32	3	151.769	9.31746	31.7407	1.87143	experimental
965	xbz_8207	CAGUGCAAUGAUGAAAGGGCAU	32	4	400.481	25.2662	164.667	27.3058	experimental
966	he_31933	AUAAUAUUGCUGAAUAAAUUGUA	32	5	156.194	8.35594	33.8704	1.99107	experimental
967	xbz_23915	GGGGGUGUAGCUCAGUGGUAGAGCAU	32	6	23377.4	247.678	24855.2	454.319	experimental
968	he_43348	GGCUUCAUAGCUCAGGGGUUAGAGCACUG	32	7	11435.5	133.193	8296.98	111.826	experimental
969	he_10106	AAGGAUGAUGAGACAGGCUAUGCUGAAG	32	8	167.222	7.11367	48.1852	6.9875	experimental
970	he_45339	AAUUAAAAUAUGGCAUUGUAUAACA	32	9	160.63	9.21355	34.9352	3.24188	experimental
971	he_20939	GUUUCCGUAGUGUAGUGGUUGUCACGUUU	32	10	11643.9	117.513	5012.91	166.993	experimental
972	TU625	AUAUCUUAAACUGUAAGAUCCUGUUUCUUCAC	32	11	157.315	5.8448	33.6389	1.57941	experimental
973	xbz_19125	UGCAUAGAGCAAGAGCCUUCU	32	12	161.843	10.7722	36.5463	2.9143	experimental
974	he_597	UCUCAGUGAUGAAAACUUUGUC	32	13	149.509	9.432	36.4444	2.31748	experimental
975	xbz_8207	CAGUGCAAUGAUGAAAGGGCAU	32	14	417.787	27.7957	167.352	12.2164	experimental
976	he_31933	AUAAUAUUGCUGAAUAAAUUGUA	32	15	144.537	7.77057	34.5833	2.37245	experimental
977	xbz_23915	GGGGGUGUAGCUCAGUGGUAGAGCAU	32	16	23178.1	217.792	24438.4	343.241	experimental
978	he_43348	GGCUUCAUAGCUCAGGGGUUAGAGCACUG	32	17	11537.4	189.904	8281.81	212.292	experimental
979	he_10106	AAGGAUGAUGAGACAGGCUAUGCUGAAG	32	18	144.546	7.1674	46.6019	6.86034	experimental
980	he_45339	AAUUAAAAUAUGGCAUUGUAUAACA	32	19	149.056	6.85611	34.9167	2.32871	experimental
981	he_20939	GUUUCCGUAGUGUAGUGGUUGUCACGUUU	32	20	11313.7	190.618	4899.77	169.696	experimental
982	chr13_D_6	UGGCCACAUUUCUCCUGGUAUAAGUCACUUGC	32	21	154.963	8.73913	33.9352	1.92996	experimental
983	xbz_19125	UGCAUAGAGCAAGAGCCUUCU	32	22	147.787	10.1549	34.2778	2.63632	experimental
984	he_597	UCUCAGUGAUGAAAACUUUGUC	32	23	143.833	6.5088	34.2407	3.00427	experimental
985	xbz_8207	CAGUGCAAUGAUGAAAGGGCAU	32	24	401.759	28.4483	154.083	21.6804	experimental
986	he_31933	AUAAUAUUGCUGAAUAAAUUGUA	32	25	146.62	6.96012	35.037	1.66282	experimental
987	xbz_23915	GGGGGUGUAGCUCAGUGGUAGAGCAU	32	26	21788.7	315.06	24606.5	271.178	experimental
988	he_43348	GGCUUCAUAGCUCAGGGGUUAGAGCACUG	32	27	11255.4	201.74	8724.88	189.913	experimental
989	he_10106	AAGGAUGAUGAGACAGGCUAUGCUGAAG	32	28	154.667	8.28804	48.2222	5.48461	experimental
990	he_45339	AAUUAAAAUAUGGCAUUGUAUAACA	32	29	152.787	4.80664	33.3981	1.76646	experimental
991	he_20939	GUUUCCGUAGUGUAGUGGUUGUCACGUUU	32	30	11148.2	124.464	5210.5	137.972	experimental
992	TU625	AUAUCUUAAACUGUAAGAUCCUGUUUCUUCAC	32	31	153.324	4.66009	34.1204	1.70056	experimental
993	TU655	GCAAGAAGUGCAAAAGUUUAUGUGGUUAGGCU	33	1	154.685	10.2908	32.4537	2.24393	experimental
994	xbz_16233	GCUUAUCAGACUGAUGCUGAAA	33	2	22238.7	213.025	15900.2	360.066	experimental
995	he_4830	UCAAGUGAAAAUGGCAGAACUUCA	33	3	177.093	15.1716	61.3611	10.3106	experimental
996	xbz_9265	GUUUCCCAGCCAACGCACCA	33	4	3539.43	141.084	458.435	29.6809	experimental
997	he_28825	UAGCACCAUUUGAAAUCGGUUA	33	5	423.815	37.6388	104.593	15.7925	experimental
998	xbz_25897	GUUUCCGUAGUGUAGUGGUCAUCACGUUC	33	6	18916.6	239.288	13041	225.06	experimental
999	he_43686	GGGGGUGUAGCUCAGUGGUAGAGCAU	33	7	23331	227.54	25082.4	334.226	experimental
1000	he_10527	GACCGCGUGGCCUAAUGGAUAAGGCGUCUG	33	8	14711.9	207.227	5490.94	162.977	experimental
1001	he_35105	AGAGGUAGUAGGUAUAGUG	33	9	182.694	11.1953	56.9352	10.1763	experimental
1002	he_23994	UUUUUCUCCAGCUCCCGAUGACUUAUGGCA	33	10	172.889	10.2349	36.3611	2.72564	experimental
1003	TU655	GCAAGAAGUGCAAAAGUUUAUGUGGUUAGGCU	33	11	156.491	6.10882	35.5463	2.71852	experimental
1004	xbz_16233	GCUUAUCAGACUGAUGCUGAAA	33	12	22582	154.075	17159	266.453	experimental
1005	he_4830	UCAAGUGAAAAUGGCAGAACUUCA	33	13	180.269	12.5977	65.537	8.32452	experimental
1006	xbz_9265	GUUUCCCAGCCAACGCACCA	33	14	3761.4	85.7272	482.343	40.2639	experimental
1007	he_28825	UAGCACCAUUUGAAAUCGGUUA	33	15	442.222	35.5231	103.269	12.6259	experimental
1008	xbz_25897	GUUUCCGUAGUGUAGUGGUCAUCACGUUC	33	16	18604.9	145.755	12759.2	185.471	experimental
1009	he_43686	GGGGGUGUAGCUCAGUGGUAGAGCAU	33	17	23289.8	244.943	23890.1	389.215	experimental
1010	he_10527	GACCGCGUGGCCUAAUGGAUAAGGCGUCUG	33	18	14447.8	185.478	5331.2	156.313	experimental
1011	he_35105	AGAGGUAGUAGGUAUAGUG	33	19	169.824	13.8076	56.5556	7.50368	experimental
1012	he_23994	UUUUUCUCCAGCUCCCGAUGACUUAUGGCA	33	20	160.454	9.18591	35.287	2.67579	experimental
1013	rt_chr2_D_2	AGGAUUGCAGUCACUGCAUGAAGUUAGUCACC	33	21	152.454	13.088	34.6759	2.55346	experimental
1014	xbz_16233	GCUUAUCAGACUGAUGCUGAAA	33	22	21802.9	272.863	14979.7	206.793	experimental
1015	he_4830	UCAAGUGAAAAUGGCAGAACUUCA	33	23	177.935	11.7412	78.3148	9.3974	experimental
1016	xbz_9265	GUUUCCCAGCCAACGCACCA	33	24	3576.13	111.557	461.741	55.0117	experimental
1017	he_28825	UAGCACCAUUUGAAAUCGGUUA	33	25	487.954	23.6194	126.87	20.9106	experimental
1018	xbz_25897	GUUUCCGUAGUGUAGUGGUCAUCACGUUC	33	26	17819.1	224.164	12703.4	231.41	experimental
1019	he_43686	GGGGGUGUAGCUCAGUGGUAGAGCAU	33	27	22212.9	263.237	24730.9	303.668	experimental
1020	he_10527	GACCGCGUGGCCUAAUGGAUAAGGCGUCUG	33	28	13887.1	178.468	5421.94	173.417	experimental
1021	he_35105	AGAGGUAGUAGGUAUAGUG	33	29	174.389	10.8601	65.1389	7.82335	experimental
1022	he_23994	UUUUUCUCCAGCUCCCGAUGACUUAUGGCA	33	30	169.37	9.54144	32.4074	1.1523	experimental
1023	TU655	GCAAGAAGUGCAAAAGUUUAUGUGGUUAGGCU	33	31	153.639	5.56937	33.4352	2.27655	experimental
1024	TU668	CUCAUUUUACCUUGAUUAGUGACUCAACUCAU	34	1	152.343	9.33405	31.4537	2.05706	experimental
1025	xbz_13765	UGGCUCAGUUCAGCAGGAACAGGA	34	2	8460.24	182.97	5704.68	215.334	experimental
1026	he_20459	GACAAUGAUGAGAAGACCUGAGG	34	3	153.87	6.38645	39.7407	5.50509	experimental
1027	xbz_11501	GAGUUCUUCCUACGAUC	34	4	162.991	12.5932	33.2407	1.51547	experimental
1028	he_32394	UUCAAGUAAUCCAGGAUAGGCUGUU	34	5	9578.8	91.6411	9788.22	214.717	experimental
1029	xbz_26076	GCUUCUGUAGUGUAGUGGUUAUCACGUUC	34	6	10554.4	175.641	3208.56	102.004	experimental
1030	he_43853	GGUUCCAUAGUGUAAUGGUGAGCACUCUGA	34	7	18088.4	199.942	8636.97	163.089	experimental
1031	he_10552	UUUCUGUGUGGAAUUUGAAUAUCUGAAA	34	8	164.944	9.1241	500.019	41.5604	experimental
1032	he_36506	UAGCAGCACAGAAAUAUUGGCA	34	9	610.046	26.2488	235.231	33.7926	experimental
1033	he_17916	AACUGACUUUAAGCAAAAUGACACGU	34	10	158.824	6.9951	33.1204	2.22441	experimental
1034	TU668	CUCAUUUUACCUUGAUUAGUGACUCAACUCAU	34	11	165.352	9.5832	32.7593	1.77137	experimental
1035	xbz_13765	UGGCUCAGUUCAGCAGGAACAGGA	34	12	8677.06	121.272	5877.15	119.49	experimental
1036	he_20459	GACAAUGAUGAGAAGACCUGAGG	34	13	160.843	7.36899	40.3148	4.39551	experimental
1037	xbz_11501	GAGUUCUUCCUACGAUC	34	14	146.935	5.48792	35.6019	1.75584	experimental
1038	he_32394	UUCAAGUAAUCCAGGAUAGGCUGUU	34	15	9502.78	157.005	9499.65	165.23	experimental
1039	xbz_26076	GCUUCUGUAGUGUAGUGGUUAUCACGUUC	34	16	10375.6	122.917	3320.62	102.25	experimental
1040	he_43853	GGUUCCAUAGUGUAAUGGUGAGCACUCUGA	34	17	18047.7	196.68	8903.3	230.582	experimental
1041	he_10552	UUUCUGUGUGGAAUUUGAAUAUCUGAAA	34	18	146.454	10.1239	530.741	35.7155	experimental
1042	he_36506	UAGCAGCACAGAAAUAUUGGCA	34	19	598.963	45.8055	254.148	20.7395	experimental
1043	he_17916	AACUGACUUUAAGCAAAAUGACACGU	34	20	145.194	8.2456	34.0185	2.37975	experimental
1044	rt_chr1_G_1	UUUUAUUAUGUAUAAAAAUUUGAUUAUAAAUC	34	21	150.731	9.92647	33.8241	2.5314	experimental
1045	xbz_13765	UGGCUCAGUUCAGCAGGAACAGGA	34	22	8233.63	139.311	5071.09	146.293	experimental
1046	he_20459	GACAAUGAUGAGAAGACCUGAGG	34	23	145.324	6.11239	40.4167	4.51814	experimental
1047	xbz_11501	GAGUUCUUCCUACGAUC	34	24	148.546	12.1627	33.4907	2.47415	experimental
1048	he_32394	UUCAAGUAAUCCAGGAUAGGCUGUU	34	25	9120.69	155.366	8996.8	168.272	experimental
1049	xbz_26076	GCUUCUGUAGUGUAGUGGUUAUCACGUUC	34	26	10318.1	196.194	3390.8	148.551	experimental
1050	he_43853	GGUUCCAUAGUGUAAUGGUGAGCACUCUGA	34	27	17410.8	240.691	9215.94	155.145	experimental
1051	he_10552	UUUCUGUGUGGAAUUUGAAUAUCUGAAA	34	28	149.593	6.13103	594.315	45.2853	experimental
1052	he_36506	UAGCAGCACAGAAAUAUUGGCA	34	29	635.38	48.4675	305.444	20.0426	experimental
1053	he_17916	AACUGACUUUAAGCAAAAUGACACGU	34	30	152.352	10.0329	31.2037	1.52707	experimental
1054	TU668	CUCAUUUUACCUUGAUUAGUGACUCAACUCAU	34	31	152.778	5.52198	32.8796	2.55671	experimental
1055	TU675	GCCUCUUUGAGGUUGGAAUAUCUGCACCCCUG	35	1	164.389	6.52792	33.0278	1.90159	experimental
1056	xbz_10531	AACGUGACCGAUCCCGGA	35	2	162.315	8.31916	68.287	9.69637	experimental
1057	he_25933	UAUUGCUUGUCCAGGCCUAU	35	3	159.694	10.1055	33.9259	2.27421	experimental
1058	xbz_1805	AGACACGUUGCGUAUUG	35	4	163.139	7.24144	35.2778	1.43932	experimental
1059	he_53229	CUUAGCAGGUUGUAUUAUCAUU	35	5	163.444	6.16492	36.6481	1.92531	experimental
1060	xbz_26118	GGGGGUGUAGCUCAGUGGUAGAGCGU	35	6	24376.6	188.248	25499.6	375.248	experimental
1061	he_44379	UCCUAUUUGUAUAGUGCUGAGUAUCCCC	35	7	1127.44	73.8264	202.676	16.9352	experimental
1062	he_11413	UCUCAUGAUGAACACAUAUGCCUCUGAGC	35	8	177.88	7.3188	239.204	32.5625	experimental
1063	he_38587	GGGAAGGUGGCUCGGGGGGUC	35	9	10469.2	84.6482	33706.2	197.328	experimental
1064	he_22798	CCUGAUGAUGAAUCUGGAGAUGCUGAUG	35	10	157.176	9.00242	34.3241	1.59923	experimental
1065	TU675	GCCUCUUUGAGGUUGGAAUAUCUGCACCCCUG	35	11	164.009	7.22857	33.9259	1.81738	experimental
1066	xbz_10531	AACGUGACCGAUCCCGGA	35	12	158.444	10.7149	83.1111	8.86275	experimental
1067	he_25933	UAUUGCUUGUCCAGGCCUAU	35	13	162.296	9.69079	34.713	1.68029	experimental
1068	xbz_1805	AGACACGUUGCGUAUUG	35	14	146.676	6.74201	36.0926	2.37407	experimental
1069	he_53229	CUUAGCAGGUUGUAUUAUCAUU	35	15	150.435	8.63948	34.6852	2.16449	experimental
1070	xbz_26118	GGGGGUGUAGCUCAGUGGUAGAGCGU	35	16	24316.1	213.428	25079.3	299.274	experimental
1071	he_44379	UCCUAUUUGUAUAGUGCUGAGUAUCCCC	35	17	1539.5	194.032	232.926	46.9857	experimental
1072	he_11413	UCUCAUGAUGAACACAUAUGCCUCUGAGC	35	18	158.954	9.41105	223.5	22.7549	experimental
1073	he_38587	GGGAAGGUGGCUCGGGGGGUC	35	19	10393.6	204.96	30900.8	519.474	experimental
1074	he_22798	CCUGAUGAUGAAUCUGGAGAUGCUGAUG	35	20	149.157	7.68195	38.3704	2.71236	experimental
1075	rt_chr4_A_3	UUGUCUUACUUUCCUCACAUAAGGAGUUAUUU	35	21	156.926	7.0852	34.9815	1.78771	experimental
1076	xbz_10531	AACGUGACCGAUCCCGGA	35	22	154.222	8.44923	90.1111	11.9886	experimental
1077	he_25933	UAUUGCUUGUCCAGGCCUAU	35	23	156.417	6.80451	35.2593	1.88635	experimental
1078	xbz_1805	AGACACGUUGCGUAUUG	35	24	153.019	7.94606	34.3611	2.67372	experimental
1079	he_53229	CUUAGCAGGUUGUAUUAUCAUU	35	25	156.648	5.29912	37.25	2.73477	experimental
1080	xbz_26118	GGGGGUGUAGCUCAGUGGUAGAGCGU	35	26	23345.3	164.542	24911.5	316.271	experimental
1081	he_44379	UCCUAUUUGUAUAGUGCUGAGUAUCCCC	35	27	1925.29	209.352	300.139	33.5842	experimental
1082	he_11413	UCUCAUGAUGAACACAUAUGCCUCUGAGC	35	28	154.704	6.67155	233.5	25.3014	experimental
1083	he_38587	GGGAAGGUGGCUCGGGGGGUC	35	29	10094.7	75.0999	31187.4	296.615	experimental
1084	he_22798	CCUGAUGAUGAAUCUGGAGAUGCUGAUG	35	30	152.63	7.31864	33.4167	2.73819	experimental
1085	TU675	GCCUCUUUGAGGUUGGAAUAUCUGCACCCCUG	35	31	161.63	10.9507	34.5741	3.5918	experimental
1086	BKG0		36	1	153.111	9.58516	33.3519	2.15439	control	control_empty	LC Internal Use
1087	xbz_3163	UGAGGUAGUUGUUGUCUAGUU	36	2	169.167	6.27039	33.5556	1.75794	experimental
1088	he_9059	CAUUCGUGAUGGGGAUGGGGG	36	3	736.167	62.8417	1545.2	97.3727	experimental
1089	xbz_3738	ACUGCAUUAUGAGCACUUAAAGU	36	4	158.519	5.74941	33.7222	1.76059	experimental
1090	he_27875	CAGAGCCGCCGCAGGUGCAGAU	36	5	343.917	17.7375	687.87	38.9625	experimental
1091	xbz_26123	GGGGGUAUAGCUCAGUGGUAGAGCGCG	36	6	20821.5	133.227	20339.4	291.788	experimental
1092	he_44769	AAAUUAGAAAUUUAACAAAAAGAUAGAU	36	7	162.648	5.18862	36.5278	1.17177	experimental
1093	he_11415	GCGGCUGAUGACAGCACUUCUGCUGAGA	36	8	170.87	6.17364	299.028	27.4218	experimental
1094	he_28251	GAGCAUGGUAAUGGAUUUAUG	36	9	160.62	6.88995	39.0833	3.72695	experimental
1095	he_15588	CUUCCCACUGCUAAAUUUAACUGGCA	36	10	5710.52	167.556	695	46.27	experimental
1096	BKG0		36	11	153.889	6.80343	34.2037	3.2056	control	control_empty	LC Internal Use
1097	xbz_3163	UGAGGUAGUUGUUGUCUAGUU	36	12	162.352	8.06088	34.7407	2.17621	experimental
1098	he_9059	CAUUCGUGAUGGGGAUGGGGG	36	13	751.333	31.2209	1584.91	66.8777	experimental
1099	xbz_3738	ACUGCAUUAUGAGCACUUAAAGU	36	14	151.102	4.94633	35.5093	1.6491	experimental
1100	he_27875	CAGAGCCGCCGCAGGUGCAGAU	36	15	342.389	25.3402	645.509	44.0056	experimental
1101	xbz_26123	GGGGGUAUAGCUCAGUGGUAGAGCGCG	36	16	20732.5	133.66	20014	262.775	experimental
1102	he_44769	AAAUUAGAAAUUUAACAAAAAGAUAGAU	36	17	151.676	9.49946	35.5185	1.83671	experimental
1103	he_11415	GCGGCUGAUGACAGCACUUCUGCUGAGA	36	18	145.731	9.62726	236.87	27.1789	experimental
1104	he_28251	GAGCAUGGUAAUGGAUUUAUG	36	19	148.963	6.8848	36.1759	2.36734	experimental
1105	he_15588	CUUCCCACUGCUAAAUUUAACUGGCA	36	20	5575.71	57.0656	690.139	52.7387	experimental
1106	BKG0		36	21	139.139	7.47014	34.5648	3.19542	control	control_empty	LC Internal Use
1107	xbz_3163	UGAGGUAGUUGUUGUCUAGUU	36	22	158.778	8.93939	33.4444	1.95431	experimental
1108	he_9059	CAUUCGUGAUGGGGAUGGGGG	36	23	805.759	36.6437	1575.24	64.4653	experimental
1109	xbz_3738	ACUGCAUUAUGAGCACUUAAAGU	36	24	154.157	6.24898	34.4259	1.69774	experimental
1110	he_27875	CAGAGCCGCCGCAGGUGCAGAU	36	25	343.787	19.5573	648.083	56.4286	experimental
1111	xbz_26123	GGGGGUAUAGCUCAGUGGUAGAGCGCG	36	26	19983.3	147.547	19658.8	254.828	experimental
1112	he_44769	AAAUUAGAAAUUUAACAAAAAGAUAGAU	36	27	153.037	8.82109	34.8426	1.96303	experimental
1113	he_11415	GCGGCUGAUGACAGCACUUCUGCUGAGA	36	28	157.426	6.20552	293.009	19.0152	experimental
1114	he_28251	GAGCAUGGUAAUGGAUUUAUG	36	29	150.583	5.90916	35.1667	2.16816	experimental
1115	he_15588	CUUCCCACUGCUAAAUUUAACUGGCA	36	30	5308.91	166.62	748.676	69.034	experimental
1116	BKG0		36	31	148.806	9.53445	33.463	1.54935	control	control_empty	LC Internal Use
1117	PUC2PM		37	1	18258.8	211.752	34025.4	723.956	control	control_spike-calibration	LC Internal Use
1118	xbz_1853	CAAAGUGAUCAAGGUUGACA	37	2	162.083	8.30508	37.3148	3.21692	experimental
1119	he_21132	UCAGGUGUGGAAACUGAGGCAG	37	3	173.5	10.3287	39.2222	2.91414	experimental
1120	xbz_13763	UUCACAGUGGCUAAGUUCU	37	4	8797.69	233.496	3864.62	137.81	experimental
1121	he_48829	UGAGCGCCUCGACGACAGAGCCG	37	5	203.435	18.1465	52.0278	5.95381	experimental
1122	xbz_26125	GGGGGUAUAGCUCAGCGGUAGAGCGCG	37	6	21759.1	234.726	19297	329.346	experimental
1123	he_44968	UUGUUGUGAUUAAUGUAUGUGGAUGAGG	37	7	181.398	8.29361	106.287	10.3752	experimental
1124	he_11517	CAUCUGUGAUGUGAACCACAACCUGAGU	37	8	169.463	7.45131	42.1204	3.27185	experimental
1125	he_41025	UGAGGUUAGGUUGUAGAGU	37	9	166.083	7.51711	37.0185	2.02314	experimental
1126	he_5849	AACAAAGAGGUUUGUGGUAGACAUGUAAU	37	10	159.537	6.4972	35.8148	2.00069	experimental
1127	PUC2PM		37	11	18360	195.663	37265.4	231.631	control	control_spike-calibration	LC Internal Use
1128	xbz_1853	CAAAGUGAUCAAGGUUGACA	37	12	157.963	6.39937	35.4722	2.74273	experimental
1129	he_21132	UCAGGUGUGGAAACUGAGGCAG	37	13	161.741	6.87318	41.5926	2.40341	experimental
1130	xbz_13763	UUCACAGUGGCUAAGUUCU	37	14	8793.37	101.171	3951.25	139.502	experimental
1131	he_48829	UGAGCGCCUCGACGACAGAGCCG	37	15	181.093	11.5407	45.5648	4.44546	experimental
1132	xbz_26125	GGGGGUAUAGCUCAGCGGUAGAGCGCG	37	16	21425.6	194.641	19213.6	286.898	experimental
1133	he_44968	UUGUUGUGAUUAAUGUAUGUGGAUGAGG	37	17	155.324	8.20853	84.2037	5.38735	experimental
1134	he_11517	CAUCUGUGAUGUGAACCACAACCUGAGU	37	18	155.611	7.89751	39.6204	2.93454	experimental
1135	he_41025	UGAGGUUAGGUUGUAGAGU	37	19	152.472	6.13624	35.8333	2.77674	experimental
1136	he_5849	AACAAAGAGGUUUGUGGUAGACAUGUAAU	37	20	153.417	7.53326	37.6019	2.5355	experimental
1137	PUC2PM		37	21	17633.7	228.016	31515.8	345.441	control	control_spike-calibration	LC Internal Use
1138	xbz_1853	CAAAGUGAUCAAGGUUGACA	37	22	153.315	5.70726	36.7685	2.37434	experimental
1139	he_21132	UCAGGUGUGGAAACUGAGGCAG	37	23	167.37	8.04147	41.1574	3.02686	experimental
1140	xbz_13763	UUCACAGUGGCUAAGUUCU	37	24	8364.42	140.707	3640.91	81.929	experimental
1141	he_48829	UGAGCGCCUCGACGACAGAGCCG	37	25	192.454	13.0809	52.6481	7.37933	experimental
1142	xbz_26125	GGGGGUAUAGCUCAGCGGUAGAGCGCG	37	26	20328.4	258.209	18170	243.347	experimental
1143	he_44968	UUGUUGUGAUUAAUGUAUGUGGAUGAGG	37	27	167.741	10.601	92.963	11.7393	experimental
1144	he_11517	CAUCUGUGAUGUGAACCACAACCUGAGU	37	28	164.935	6.32939	41.7593	4.0646	experimental
1145	he_41025	UGAGGUUAGGUUGUAGAGU	37	29	157.231	6.73199	35.4444	2.34554	experimental
1146	he_5849	AACAAAGAGGUUUGUGGUAGACAUGUAAU	37	30	154.343	5.82961	34.4352	2.21411	experimental
1147	PUC2PM		37	31	17119.8	205.464	32715.6	300.497	control	control_spike-calibration	LC Internal Use
1148	PUC2MM		38	1	16255.1	179.649	30549.2	572.179	control	control_spike-calibration	LC Internal Use
1149	xbz_2177	CAGUGCAAUGUUAAAAGGGCAU	38	2	633.981	26.009	315.074	32.3254	experimental
1150	he_1011	CGGCUCUGGGUCUGUGGGGAGC	38	3	800.241	44.5993	1710.66	70.5584	experimental
1151	xbz_13870	UAUGUGCCUUUGGACUACAUCG	38	4	166.435	8.61565	36.7407	2.19332	experimental
1152	he_51418	UCGAGGAGCUCACAGUCUAGUAU	38	5	5272.89	80.7936	3038.89	119.756	experimental
1153	xbz_26127	GGGGGUAUAGCUCAGUGGUAGAGAGUG	38	6	19407.8	232.17	22158.9	261.312	experimental
1154	he_45766	GGGGGUAUAGCUCAGGGGUAGAGAUUUG	38	7	24217.9	280.652	24366.3	308.489	experimental
1155	he_11751	AACCGAGCGUCCAAGCUCUUUCCAUUU	38	8	200.139	9.32032	40.1111	1.9254	experimental
1156	he_51341	CUGGGAGGUGGAUGUUUACUUC	38	9	195.491	8.96045	44.3611	3.94935	experimental
1157	he_3161	AUCAGAAGUCUGGUCACCUGGGGAAA	38	10	163.333	6.80983	38.3148	4.29659	experimental
1158	PUC2MM		38	11	16491.8	147.153	32516.8	377.008	control	control_spike-calibration	LC Internal Use
1159	xbz_2177	CAGUGCAAUGUUAAAAGGGCAU	38	12	641.519	33.8621	312.602	32.2577	experimental
1160	he_1011	CGGCUCUGGGUCUGUGGGGAGC	38	13	790.167	37.255	1833.44	68.0414	experimental
1161	xbz_13870	UAUGUGCCUUUGGACUACAUCG	38	14	160.491	8.97087	36.6389	3.17248	experimental
1162	he_51418	UCGAGGAGCUCACAGUCUAGUAU	38	15	5070.14	101.514	2859.45	70.1959	experimental
1163	xbz_26127	GGGGGUAUAGCUCAGUGGUAGAGAGUG	38	16	19169.2	262.322	22256	266.3	experimental
1164	he_45766	GGGGGUAUAGCUCAGGGGUAGAGAUUUG	38	17	23826.2	233.76	23632.2	324.681	experimental
1165	he_11751	AACCGAGCGUCCAAGCUCUUUCCAUUU	38	18	191.546	10.5816	38.7593	3.65797	experimental
1166	he_51341	CUGGGAGGUGGAUGUUUACUUC	38	19	173.796	8.53115	43.8148	3.48869	experimental
1167	he_3161	AUCAGAAGUCUGGUCACCUGGGGAAA	38	20	150.796	4.53184	40.8426	2.4842	experimental
1168	PUC2MM		38	21	15818.7	162.098	28537.3	300.759	control	control_spike-calibration	LC Internal Use
1169	xbz_2177	CAGUGCAAUGUUAAAAGGGCAU	38	22	626.741	34.9741	300.204	39.5672	experimental
1170	he_1011	CGGCUCUGGGUCUGUGGGGAGC	38	23	878.519	40.1703	1978.15	56.1373	experimental
1171	xbz_13870	UAUGUGCCUUUGGACUACAUCG	38	24	152.093	6.83386	35.5648	2.62366	experimental
1172	he_51418	UCGAGGAGCUCACAGUCUAGUAU	38	25	4858.81	73.2209	2676.02	75.6952	experimental
1173	xbz_26127	GGGGGUAUAGCUCAGUGGUAGAGAGUG	38	26	18394.6	159.787	20951.8	265.734	experimental
1174	he_45766	GGGGGUAUAGCUCAGGGGUAGAGAUUUG	38	27	23040.9	107.013	24073	298.813	experimental
1175	he_11751	AACCGAGCGUCCAAGCUCUUUCCAUUU	38	28	192.296	9.0989	38.787	3.24412	experimental
1176	he_51341	CUGGGAGGUGGAUGUUUACUUC	38	29	185.491	5.80122	45.787	4.75582	experimental
1177	he_3161	AUCAGAAGUCUGGUCACCUGGGGAAA	38	30	161.25	7.4258	37.6481	2.6802	experimental
1178	PUC2MM		38	31	15310.3	234.094	29015.1	349.177	control	control_spike-calibration	LC Internal Use
1179	PUC2PM-20B		39	1	36014.8	272.941	23065.1	394.571	control	control_spike-calibration	LC Internal Use
1180	xbz_1041	CAUAACUUGACCUCUCUGACUA	39	2	324.778	12.5522	45.6019	4.39401	experimental
1181	he_16755	GGCCAGUUGGUGAAGCAGUU	39	3	1971.26	71.8649	512.731	43.5174	experimental
1182	xbz_702	UAUUGCACUCGUCCCGGCCU	39	4	8072.44	181.808	7092.93	173.16	experimental
1183	he_49594	CAAAGUGCUGUUCGUGCAGGUAG	39	5	964.574	50.7473	323.685	22.2096	experimental
1184	xbz_28951	AGCUCCGAGGUGAUUUUCAUAUUGAA	39	6	1139.72	50.1291	216.556	21.0577	experimental
1185	he_45964	AGUGAUGUUGUAAAAAUAAAUGUCUGAA	39	7	166.435	5.92677	48.3333	5.60541	experimental
1186	he_11793	GAUAUAGACAGCAGGACGGUGGCCAUGG	39	8	3942.38	96.0771	11263.2	190.694	experimental
1187	he_31220	UGGAGACGCGGCCCUGUUGGAGU	39	9	176.648	6.04085	41.6111	5.19135	experimental
1188	he_8384	AUGUUCUCUGAGGACCCGCGGCUUCGCA	39	10	161.111	6.44217	37.7315	2.43651	experimental
1189	PUC2PM-20B		39	11	36348.4	224.492	24812.3	364.978	control	control_spike-calibration	LC Internal Use
1190	xbz_1041	CAUAACUUGACCUCUCUGACUA	39	12	420.213	28.7893	45.5833	4.91826	experimental
1191	he_16755	GGCCAGUUGGUGAAGCAGUU	39	13	2076.93	96.2392	551.13	44.838	experimental
1192	xbz_702	UAUUGCACUCGUCCCGGCCU	39	14	8019.83	136.202	6951.69	178.807	experimental
1193	he_49594	CAAAGUGCUGUUCGUGCAGGUAG	39	15	907.5	62.5594	309.944	35.3053	experimental
1194	xbz_28951	AGCUCCGAGGUGAUUUUCAUAUUGAA	39	16	1250.23	91.7018	231.222	20.0855	experimental
1195	he_45964	AGUGAUGUUGUAAAAAUAAAUGUCUGAA	39	17	150.843	7.30403	43.8148	3.03915	experimental
1196	he_11793	GAUAUAGACAGCAGGACGGUGGCCAUGG	39	18	3801.75	128.539	11073.2	219.265	experimental
1197	he_31220	UGGAGACGCGGCCCUGUUGGAGU	39	19	154.722	9.40951	36.8981	2.45688	experimental
1198	he_8384	AUGUUCUCUGAGGACCCGCGGCUUCGCA	39	20	151.556	6.33391	37.9444	2.38701	experimental
1199	PUC2PM-20B		39	21	35395.1	231.24	21532.7	221.732	control	control_spike-calibration	LC Internal Use
1200	xbz_1041	CAUAACUUGACCUCUCUGACUA	39	22	559.843	32.3162	49.9815	3.83535	experimental
1201	he_16755	GGCCAGUUGGUGAAGCAGUU	39	23	2317.55	69.5843	635.639	37.8016	experimental
1202	xbz_702	UAUUGCACUCGUCCCGGCCU	39	24	7563.81	119.564	6135.34	88.1758	experimental
1203	he_49594	CAAAGUGCUGUUCGUGCAGGUAG	39	25	927.981	38.0671	273.167	31.7512	experimental
1204	xbz_28951	AGCUCCGAGGUGAUUUUCAUAUUGAA	39	26	1346.7	59.6175	287.556	28.4895	experimental
1205	he_45964	AGUGAUGUUGUAAAAAUAAAUGUCUGAA	39	27	155.963	7.71929	48.4444	3.92293	experimental
1206	he_11793	GAUAUAGACAGCAGGACGGUGGCCAUGG	39	28	3666.53	68.4223	11268	167.632	experimental
1207	he_31220	UGGAGACGCGGCCCUGUUGGAGU	39	29	167.315	9.8043	41.8796	4.50279	experimental
1208	he_8384	AUGUUCUCUGAGGACCCGCGGCUUCGCA	39	30	154.222	12.155	36.0648	3.48903	experimental
1209	PUC2PM-20B		39	31	34032.1	162.568	22225.4	282.152	control	control_spike-calibration	LC Internal Use
1210	PUC2MM-20B		40	1	161.88	6.98425	36.037	2.62599	control	control_spike-calibration	LC Internal Use
1211	xbz_10778	AGAGAUUAUAAAAUUGGAUUU	40	2	161.009	6.66487	33.1019	1.97621	experimental
1212	he_8861	CGGGGUUUUGAGGGCGAGAUGA	40	3	356.019	20.6872	113.565	13.5504	experimental
1213	xbz_13761	AUCACAUUGCCAGGGAUUA	40	4	18087.5	580.523	18130	1065.01	experimental
1214	he_48075	CUUUCAGUCGGAUGUUUGCAGC	40	5	930.491	56.8859	373.444	25.5787	experimental
1215	xbz_998	UCCCUGGUGGUCUAGUGGUUAGGAUUUGG	40	6	39738	302.921	31594.9	392.927	experimental
1216	he_46034	CCCCCACUGUUAAAUUUGACUGGCUU	40	7	6718.05	81.8553	1018.51	35.4439	experimental
1217	he_12443	GAAAAUGAUGAUCCUUCUCAUCUGAUG	40	8	161.583	5.5956	36.4815	1.97404	experimental
1218	he_37964	CAACAUGAUGACUCUAGUGCCUGAUU	40	9	176.343	8.84885	36.75	1.49844	experimental
1219	he_3159	CUGAUGAGAAUGUGAAUAGCUUUUAUU	40	10	161.111	11.4747	34.0093	2.42455	experimental
1220	PUC2MM-20B		40	11	171.491	10.5861	37.6019	3.07823	control	control_spike-calibration	LC Internal Use
1221	xbz_10778	AGAGAUUAUAAAAUUGGAUUU	40	12	160.852	7.25351	34.6296	1.52605	experimental
1222	he_8861	CGGGGUUUUGAGGGCGAGAUGA	40	13	357.407	24.4498	115.574	12.9804	experimental
1223	xbz_13761	AUCACAUUGCCAGGGAUUA	40	14	18187.1	192.723	18135.5	182.244	experimental
1224	he_48075	CUUUCAGUCGGAUGUUUGCAGC	40	15	907.185	80.3552	358.889	26.4749	experimental
1225	xbz_998	UCCCUGGUGGUCUAGUGGUUAGGAUUUGG	40	16	38801.1	288.271	30267.1	436.26	experimental
1226	he_46034	CCCCCACUGUUAAAUUUGACUGGCUU	40	17	6693.91	150.003	1108.24	69.3686	experimental
1227	he_12443	GAAAAUGAUGAUCCUUCUCAUCUGAUG	40	18	146.407	5.0438	37.8056	2.53742	experimental
1228	he_37964	CAACAUGAUGACUCUAGUGCCUGAUU	40	19	152.157	11.118	33.9722	2.94643	experimental
1229	he_3159	CUGAUGAGAAUGUGAAUAGCUUUUAUU	40	20	151.63	7.73461	34.1759	1.55779	experimental
1230	PUC2MM-20B		40	21	160.509	9.11145	39.5741	3.20106	control	control_spike-calibration	LC Internal Use
1231	xbz_10778	AGAGAUUAUAAAAUUGGAUUU	40	22	156.981	8.16647	35.8704	2.52499	experimental
1232	he_8861	CGGGGUUUUGAGGGCGAGAUGA	40	23	328.185	30.4306	117.287	11.9297	experimental
1233	xbz_13761	AUCACAUUGCCAGGGAUUA	40	24	17239.5	166.715	15971.2	162.463	experimental
1234	he_48075	CUUUCAGUCGGAUGUUUGCAGC	40	25	907.537	50.2406	351.565	33.0489	experimental
1235	xbz_998	UCCCUGGUGGUCUAGUGGUUAGGAUUUGG	40	26	37036.6	178.206	29760.4	471.735	experimental
1236	he_46034	CCCCCACUGUUAAAUUUGACUGGCUU	40	27	6400.41	89.0532	1131.11	46.9425	experimental
1237	he_12443	GAAAAUGAUGAUCCUUCUCAUCUGAUG	40	28	155.759	7.52053	35.213	1.87482	experimental
1238	he_37964	CAACAUGAUGACUCUAGUGCCUGAUU	40	29	158.574	3.89873	35.0926	2.80699	experimental
1239	he_3159	CUGAUGAGAAUGUGAAUAGCUUUUAUU	40	30	153.907	6.26746	34.4074	2.24665	experimental
1240	PUC2MM-20B		40	31	161.435	9.3831	38.4167	3.05441	control	control_spike-calibration	LC Internal Use
1241	a2-PUC2PM-20B		41	1	45147.5	376.294	24958.6	531.018	control	control_spike-calibration	LC Internal Use
1242	xbz_1728	UGAGAACUGAAUUCCAUAGGCUGU	41	2	276.657	30.1817	71.6111	7.61066	experimental
1243	he_25103	UGGCUCAGUUCAGCAGGAACAGGA	41	3	8798.09	185.949	6090.9	190.262	experimental
1244	xbz_8338	UGAGGUAGUAGGUUGUGUGGUU	41	4	16407.7	143.539	26408.8	545.231	experimental
1245	he_42703	AAUUCUGAAACUAUUUACUUACA	41	5	164.731	6.19558	38.7593	1.78713	experimental
1246	xbz_3182	UCCUCGUUAGUAUAGUGGUUAGUAUCCCCG	41	6	35882.9	175.539	26810.3	335.256	experimental
1247	he_46242	GUUUAUGUAGCUUACUUCCUCAAAGCAAUA	41	7	16953.2	229.66	2124.4	94.0446	experimental
1248	he_12588	GCUGAUGAUGAUAAUAUUGCCUGAAG	41	8	165.843	4.76977	63.6667	6.40969	experimental
1249	he_36384	ACCGUGGCUUUCGAUUGUUACU	41	9	163.944	8.17088	39.5648	2.14552	experimental
1250	he_7624	UGCUACCCCCUGCAGGAUUUGGAUACAU	41	10	177.093	11.6166	36.3981	2.17006	experimental
1251	a2-PUC2PM-20B		41	11	45147	277.334	26402.1	423.833	control	control_spike-calibration	LC Internal Use
1252	xbz_1728	UGAGAACUGAAUUCCAUAGGCUGU	41	12	256.657	21.8183	73.6759	11.0697	experimental
1253	he_25103	UGGCUCAGUUCAGCAGGAACAGGA	41	13	8663.44	84.8197	5516.6	157.213	experimental
1254	xbz_8338	UGAGGUAGUAGGUUGUGUGGUU	41	14	16225.9	196.41	26025.3	368.705	experimental
1255	he_42703	AAUUCUGAAACUAUUUACUUACA	41	15	153.426	9.38203	37.0926	2.18977	experimental
1256	xbz_3182	UCCUCGUUAGUAUAGUGGUUAGUAUCCCCG	41	16	35119.7	202.999	26256.2	429.041	experimental
1257	he_46242	GUUUAUGUAGCUUACUUCCUCAAAGCAAUA	41	17	16604.4	214.424	2397.16	131.87	experimental
1258	he_12588	GCUGAUGAUGAUAAUAUUGCCUGAAG	41	18	148.046	11.4454	58.4167	6.13878	experimental
1259	he_36384	ACCGUGGCUUUCGAUUGUUACU	41	19	149.176	8.4906	35.25	3.28442	experimental
1260	he_7624	UGCUACCCCCUGCAGGAUUUGGAUACAU	41	20	150.759	7.5441	38.9259	3.4606	experimental
1261	a2-PUC2PM-20B		41	21	44529.4	256.076	22894.2	474.037	control	control_spike-calibration	LC Internal Use
1262	xbz_1728	UGAGAACUGAAUUCCAUAGGCUGU	41	22	263.407	21.5389	68.8148	6.81415	experimental
1263	he_25103	UGGCUCAGUUCAGCAGGAACAGGA	41	23	8220.33	130.498	5310.72	117.064	experimental
1264	xbz_8338	UGAGGUAGUAGGUUGUGUGGUU	41	24	15197.3	225.889	22739.8	262.42	experimental
1265	he_42703	AAUUCUGAAACUAUUUACUUACA	41	25	160.667	7.8538	38.3148	2.01234	experimental
1266	xbz_3182	UCCUCGUUAGUAUAGUGGUUAGUAUCCCCG	41	26	33400.7	209.197	24877	314.852	experimental
1267	he_46242	GUUUAUGUAGCUUACUUCCUCAAAGCAAUA	41	27	16167.4	81.8013	2498.89	65.8004	experimental
1268	he_12588	GCUGAUGAUGAUAAUAUUGCCUGAAG	41	28	152.306	7.77302	65.787	6.71315	experimental
1269	he_36384	ACCGUGGCUUUCGAUUGUUACU	41	29	151.704	8.71915	36.3796	2.69897	experimental
1270	he_7624	UGCUACCCCCUGCAGGAUUUGGAUACAU	41	30	162.148	8.22785	34.6852	2.36662	experimental
1271	a2-PUC2PM-20B		41	31	42307.7	267.43	23371.3	253.652	control	control_spike-calibration	LC Internal Use
1272	a2-PUC2MM-20B		42	1	190.583	13.8646	44.4167	4.11545	control	control_spike-calibration	LC Internal Use
1273	xbz_10532	GGAAAGCGUCGCGGU	42	2	292.806	20.7722	186.713	18.9584	experimental
1274	xbz_23158	GUUUGAUUGCUGUCGGAGCCA	42	3	167.944	9.02523	40.3611	3.87047	experimental
1275	xbz_12440	UCUGUGUCUGAAUCUGUUAG	42	4	157.889	7.11499	35.6944	3.63384	experimental
1276	he_38410	GGGGUUCCUGGGGAUGGGAUUU	42	5	426.222	25.4516	92.9722	9.15031	experimental
1277	xbz_4623	GGGGGUAUAGCUCAGUGGGUAGAGCAUUUG	42	6	21389.2	200.073	20853.2	173.296	experimental
1278	he_46408	GAGAAAGCUCAUAAGAACUGCUAACU	42	7	7543.25	107.852	1200.48	33.8922	experimental
1279	he_13183	UCAGAGAGCUAUCUUAAGAGCAAGAAA	42	8	462.454	31.8831	302.093	41.6017	experimental
1280	he_46244	GAGUCACAGUCCGAUGA	42	9	159.889	7.92763	35.2407	2.05017	experimental
1281	he_15138	AAGCCCGGAAGGUGGAGAUUGCAGUG	42	10	170.806	7.67136	64.2778	8.372	experimental
1282	a2-PUC2MM-20B		42	11	180.611	10.711	47.6296	5.56288	control	control_spike-calibration	LC Internal Use
1283	xbz_10532	GGAAAGCGUCGCGGU	42	12	298.852	19.9344	208.037	20.0261	experimental
1284	xbz_23158	GUUUGAUUGCUGUCGGAGCCA	42	13	156.065	8.4259	39.2963	3.42956	experimental
1285	xbz_12440	UCUGUGUCUGAAUCUGUUAG	42	14	155.241	7.14191	34.1204	2.16479	experimental
1286	he_38410	GGGGUUCCUGGGGAUGGGAUUU	42	15	382.056	21.7573	90.0185	14.6587	experimental
1287	xbz_4623	GGGGGUAUAGCUCAGUGGGUAGAGCAUUUG	42	16	20953.8	181.881	20923	259.76	experimental
1288	he_46408	GAGAAAGCUCAUAAGAACUGCUAACU	42	17	7538.89	110.557	1288.62	85.0785	experimental
1289	he_13183	UCAGAGAGCUAUCUUAAGAGCAAGAAA	42	18	470.75	34.1648	318.852	24.8637	experimental
1290	he_46244	GAGUCACAGUCCGAUGA	42	19	147.352	10.4768	35.037	2.32791	experimental
1291	he_15138	AAGCCCGGAAGGUGGAGAUUGCAGUG	42	20	163.565	10.0404	70.1759	8.98787	experimental
1292	a2-PUC2MM-20B		42	21	174.231	8.00421	47.7963	4.993	control	control_spike-calibration	LC Internal Use
1293	xbz_10532	GGAAAGCGUCGCGGU	42	22	286.722	20.6365	212.833	44.2253	experimental
1294	xbz_23158	GUUUGAUUGCUGUCGGAGCCA	42	23	150.769	4.71745	37.5833	2.33672	experimental
1295	xbz_12440	UCUGUGUCUGAAUCUGUUAG	42	24	152.722	7.88922	36.037	2.6331	experimental
1296	he_38410	GGGGUUCCUGGGGAUGGGAUUU	42	25	376.778	29.5592	90.1204	10.6374	experimental
1297	xbz_4623	GGGGGUAUAGCUCAGUGGGUAGAGCAUUUG	42	26	20262.6	179.371	19505.1	295.114	experimental
1298	he_46408	GAGAAAGCUCAUAAGAACUGCUAACU	42	27	7348.4	135.519	1339.77	43.6022	experimental
1299	he_13183	UCAGAGAGCUAUCUUAAGAGCAAGAAA	42	28	506.769	34.5171	369.611	29.6521	experimental
1300	he_46244	GAGUCACAGUCCGAUGA	42	29	148.88	7.52903	33.2963	2.11474	experimental
1301	he_15138	AAGCCCGGAAGGUGGAGAUUGCAGUG	42	30	157.713	8.36107	60.5648	6.20261	experimental
1302	a2-PUC2MM-20B		42	31	185.685	7.56115	47.0556	5.35616	control	control_spike-calibration	LC Internal Use
1303	a3-PUC2PM-20B		43	1	45076.1	497.436	25998.6	483.262	control	control_spike-calibration	LC Internal Use
1304	xbz_4815	CGGGGUUUUGAGGGCGAGAUGA	43	2	340.491	22.0643	119.87	15.215	experimental
1305	xbz_24446	CUGGAUUGUGGGGUAAGCUA	43	3	2431.85	102.718	3088.9	88.1629	experimental
1306	xbz_5256	AAGGUAUUUGAAAAACCAU	43	4	161.352	6.83902	35.2963	2.17573	experimental
1307	he_49595	CCGCACUGUGGGUACUUGCUGC	43	5	328.676	26.9918	92.8148	13.8936	experimental
1308	xbz_5246	GCGUUGGUGGUAUAGUGGUAAGCAUAGCUG	43	6	30895	223.767	37346.8	426.459	experimental
1309	he_46690	UAAUCUGUCACUCUGAAGGCUUUGUUAU	43	7	179.935	15.811	43.6574	4.20983	experimental
1310	he_13555	GGGGAUGUAGCUCAGUGGUAGAGCGCG	43	8	16838.1	182.182	18367.2	225.74	experimental
1311	he_36597	AGCUACAUUUGGCUGGGUCU	43	9	358.815	23.1622	928.019	45.3977	experimental
1312	he_15155	AAAAUAGAUCUGACUUAAGAACUAAA	43	10	164.083	7.53326	36.2778	2.54615	experimental
1313	a3-PUC2PM-20B		43	11	44742.1	182.873	25942.2	438.286	control	control_spike-calibration	LC Internal Use
1314	xbz_4815	CGGGGUUUUGAGGGCGAGAUGA	43	12	349.991	29.7241	110.185	12.2895	experimental
1315	xbz_24446	CUGGAUUGUGGGGUAAGCUA	43	13	2394.31	87.9777	3002.06	138.701	experimental
1316	xbz_5256	AAGGUAUUUGAAAAACCAU	43	14	147.389	7.86193	36.9259	2.75037	experimental
1317	he_49595	CCGCACUGUGGGUACUUGCUGC	43	15	299.454	24.2631	83.4167	10.9324	experimental
1318	xbz_5246	GCGUUGGUGGUAUAGUGGUAAGCAUAGCUG	43	16	29976.4	241.741	36226.4	208.352	experimental
1319	he_46690	UAAUCUGUCACUCUGAAGGCUUUGUUAU	43	17	154.62	6.97354	43.1759	3.93363	experimental
1320	he_13555	GGGGAUGUAGCUCAGUGGUAGAGCGCG	43	18	16821.1	215.029	18632.8	331.553	experimental
1321	he_36597	AGCUACAUUUGGCUGGGUCU	43	19	347.537	24.4336	973.537	55.904	experimental
1322	he_15155	AAAAUAGAUCUGACUUAAGAACUAAA	43	20	148.343	9.32203	36.287	2.87773	experimental
1323	a3-PUC2PM-20B		43	21	43425.5	364.763	23627.7	317.076	control	control_spike-calibration	LC Internal Use
1324	xbz_4815	CGGGGUUUUGAGGGCGAGAUGA	43	22	327.769	23.0224	117.806	15.2533	experimental
1325	xbz_24446	CUGGAUUGUGGGGUAAGCUA	43	23	2382.65	97.8818	2930.65	113.502	experimental
1326	xbz_5256	AAGGUAUUUGAAAAACCAU	43	24	156.139	6.91532	34.5	1.72665	experimental
1327	he_49595	CCGCACUGUGGGUACUUGCUGC	43	25	307.759	21.3563	98.7222	11.9358	experimental
1328	xbz_5246	GCGUUGGUGGUAUAGUGGUAAGCAUAGCUG	43	26	28713.1	188.89	34498.3	384.09	experimental
1329	he_46690	UAAUCUGUCACUCUGAAGGCUUUGUUAU	43	27	161.63	6.8952	42.9352	2.1015	experimental
1330	he_13555	GGGGAUGUAGCUCAGUGGUAGAGCGCG	43	28	15967	201.202	18749.5	267.966	experimental
1331	he_36597	AGCUACAUUUGGCUGGGUCU	43	29	384.019	22.1127	1091.64	54.3989	experimental
1332	he_15155	AAAAUAGAUCUGACUUAAGAACUAAA	43	30	148.972	7.06506	34.463	2.15053	experimental
1333	a3-PUC2PM-20B		43	31	41847.1	240.549	23402.9	255.578	control	control_spike-calibration	LC Internal Use
1334	a3-PUC2MM-20B		44	1	184.954	9.29716	46.5463	4.1477	control	control_spike-calibration	LC Internal Use
1335	xbz_865	AAAUAUAUUGUUGACUUGU	44	2	165.12	5.99644	32.6759	1.63963	experimental
1336	xbz_15773	CUCACUGAACAAUGAAUGCAA	44	3	156.12	9.54842	34.3333	2.10917	experimental
1337	xbz_14453	CAUACUUGUUGGAGUA	44	4	165.259	6.61826	35.3333	2.27132	experimental
1338	he_36724	AAACCGUUACCAUUACUGAGUU	44	5	161.556	5.6541	35.6944	1.88679	experimental
1339	xbz_7200	GGGGAUGUAGCUCAGUGGUAGAGCGCG	44	6	16819.9	180.754	18176	112.114	experimental
1340	he_46744	AGAACGUGUGGAAAACUAAUGACUGAGCA	44	7	268.787	9.73773	6760.64	142.37	experimental
1341	he_13758	AGGGGUAUAGCUCAGUGGGGAGCAUUUG	44	8	24036.5	144.516	21134.9	191.165	experimental
1342	he_44348	GCGCUGAGGCUCUCACGCCUGUGAUGGA	44	9	158.269	6.83122	38.1944	3.44369	experimental
1343	he_15187	AAGGAUUAGGAAAUAGAUUUUAACAA	44	10	159.056	8.20967	31.9167	1.98181	experimental
1344	a3-PUC2MM-20B		44	11	183.352	11.6284	46.0093	4.72713	control	control_spike-calibration	LC Internal Use
1345	xbz_865	AAAUAUAUUGUUGACUUGU	44	12	157.241	8.13079	35	1.74013	experimental
1346	xbz_15773	CUCACUGAACAAUGAAUGCAA	44	13	156.889	5.19405	33.9815	2.20442	experimental
1347	xbz_14453	CAUACUUGUUGGAGUA	44	14	161.352	9.39409	35.6574	2.20519	experimental
1348	he_36724	AAACCGUUACCAUUACUGAGUU	44	15	150.593	12.7118	35.3796	2.61097	experimental
1349	xbz_7200	GGGGAUGUAGCUCAGUGGUAGAGCGCG	44	16	16751.9	142.617	18680.5	226.466	experimental
1350	he_46744	AGAACGUGUGGAAAACUAAUGACUGAGCA	44	17	237.139	13.3476	6982.38	153.472	experimental
1351	he_13758	AGGGGUAUAGCUCAGUGGGGAGCAUUUG	44	18	23272.2	211.325	21448.4	290.695	experimental
1352	he_44348	GCGCUGAGGCUCUCACGCCUGUGAUGGA	44	19	147.935	7.72576	40.1944	4.53328	experimental
1353	he_15187	AAGGAUUAGGAAAUAGAUUUUAACAA	44	20	147.991	6.02719	35.5741	2.01027	experimental
1354	a3-PUC2MM-20B		44	21	171.843	7.78707	48.9537	6.07797	control	control_spike-calibration	LC Internal Use
1355	xbz_865	AAAUAUAUUGUUGACUUGU	44	22	146.139	8.28856	33.5926	2.37604	experimental
1356	xbz_15773	CUCACUGAACAAUGAAUGCAA	44	23	149.722	2.682	35.3426	1.69751	experimental
1357	xbz_14453	CAUACUUGUUGGAGUA	44	24	152.019	6.78644	35.4352	2.52935	experimental
1358	he_36724	AAACCGUUACCAUUACUGAGUU	44	25	158.87	6.7659	37.5278	2.4244	experimental
1359	xbz_7200	GGGGAUGUAGCUCAGUGGUAGAGCGCG	44	26	16059.3	164.037	17027.4	220.782	experimental
1360	he_46744	AGAACGUGUGGAAAACUAAUGACUGAGCA	44	27	246.833	12.0532	6635.5	98.0589	experimental
1361	he_13758	AGGGGUAUAGCUCAGUGGGGAGCAUUUG	44	28	22534.7	182.236	21625.1	162.128	experimental
1362	he_44348	GCGCUGAGGCUCUCACGCCUGUGAUGGA	44	29	151.926	4.69978	38.5278	4.15012	experimental
1363	he_15187	AAGGAUUAGGAAAUAGAUUUUAACAA	44	30	144.63	6.8435	33.5648	2.54776	experimental
1364	a3-PUC2MM-20B		44	31	181.667	7.75079	46.5556	5.0978	control	control_spike-calibration	LC Internal Use
1365	a-PUC2PM		45	1	21724.3	284.845	42497	630.72	control	control_spike-calibration	LC Internal Use
1366	xbz_785	UUGCUUAUAGACUGAUUUUGA	45	2	161.917	5.02726	37.8426	2.63748	experimental
1367	xbz_15823	UAGCACCAUUUGAAAUCAGUGUUU	45	3	192.583	10.584	57.3611	6.72484	experimental
1368	xbz_8050	UGAGGUAGUAGGUUGUAUGGUU	45	4	17133.1	302.285	27339.3	1147.26	experimental
1369	he_38783	GCAAAGCACACGGCCUGCAGAGAGG	45	5	210.602	11.7568	80.5741	13.2821	experimental
1370	xbz_10910	UUACUUCGAGUACAUUGUAACCACCU	45	6	228.722	15.5569	54.5	3.83662	experimental
1371	he_46823	UCAUCAGUAUAGUGGUGAGUAUCCCC	45	7	27718.1	220.121	21591.4	283.598	experimental
1372	he_13856	CCUCCCACUGCUAAAUUUGACUGGCUU	45	8	10274.5	113.436	2178.04	93.9336	experimental
1373	he_29243	UGGAAGACUAUUGUUGUUCUUA	45	9	162.528	7.12696	38.3704	2.82708	experimental
1374	he_15199	AUAUUGAACUUGAAAAUAAAAAAUUA	45	10	159.417	5.43977	37.5	2.31815	experimental
1375	a-PUC2PM		45	11	21665.1	217.732	43426.9	489.231	control	control_spike-calibration	LC Internal Use
1376	xbz_785	UUGCUUAUAGACUGAUUUUGA	45	12	155.574	8.90469	35.6852	2.1515	experimental
1377	xbz_15823	UAGCACCAUUUGAAAUCAGUGUUU	45	13	185.25	13.5516	58.4537	8.16922	experimental
1378	xbz_8050	UGAGGUAGUAGGUUGUAUGGUU	45	14	16963.9	193.499	27626.9	261.754	experimental
1379	he_38783	GCAAAGCACACGGCCUGCAGAGAGG	45	15	193.185	10.0253	78.2315	11.444	experimental
1380	xbz_10910	UUACUUCGAGUACAUUGUAACCACCU	45	16	207.676	14.5003	53.2778	5.89286	experimental
1381	he_46823	UCAUCAGUAUAGUGGUGAGUAUCCCC	45	17	26434.4	252.447	21460.9	230.181	experimental
1382	he_13856	CCUCCCACUGCUAAAUUUGACUGGCUU	45	18	9658.05	139.097	2277.07	46.9017	experimental
1383	he_29243	UGGAAGACUAUUGUUGUUCUUA	45	19	151.824	8.77425	36.2222	2.26032	experimental
1384	he_15199	AUAUUGAACUUGAAAAUAAAAAAUUA	45	20	146.046	11.5665	38.2778	2.49423	experimental
1385	a-PUC2PM		45	21	20613.9	194.945	38319.9	599.383	control	control_spike-calibration	LC Internal Use
1386	xbz_785	UUGCUUAUAGACUGAUUUUGA	45	22	152.426	10.3013	36.6019	1.94763	experimental
1387	xbz_15823	UAGCACCAUUUGAAAUCAGUGUUU	45	23	171.324	9.7356	56.8519	7.30742	experimental
1388	xbz_8050	UGAGGUAGUAGGUUGUAUGGUU	45	24	16067.3	226.687	23971.4	236.555	experimental
1389	he_38783	GCAAAGCACACGGCCUGCAGAGAGG	45	25	198.704	10.4758	86.7778	12.9242	experimental
1390	xbz_10910	UUACUUCGAGUACAUUGUAACCACCU	45	26	222.759	13.3486	54.8241	6.10321	experimental
1391	he_46823	UCAUCAGUAUAGUGGUGAGUAUCCCC	45	27	25621.1	320.939	20809.4	380.081	experimental
1392	he_13856	CCUCCCACUGCUAAAUUUGACUGGCUU	45	28	9550.99	98.075	2318.36	75.8855	experimental
1393	he_29243	UGGAAGACUAUUGUUGUUCUUA	45	29	154.259	10.8364	36.3981	2.16143	experimental
1394	he_15199	AUAUUGAACUUGAAAAUAAAAAAUUA	45	30	152.074	7.21202	34.9074	1.71599	experimental
1395	a-PUC2PM		45	31	20189.9	163.09	38712.5	426.269	control	control_spike-calibration	LC Internal Use
1396	a-PUC2MM2d		46	1	420.25	27.2432	561.667	48.3981	control	control_spike-calibration	LC Internal Use
1397	xbz_8958	GGCCAGUUGGUGAAGCAGUU	46	2	1963.06	91.1277	496.778	37.151	experimental
1398	xbz_26760	AGUUGGUUACAGCUUGGUGU	46	3	162.296	10.9205	36.1111	3.02121	experimental
1399	xbz_9344	CACUAGAUUGUGAGCUCCUGGA	46	4	390.361	26.399	123.981	17.9146	experimental
1400	he_49836	UAGCACCAUCUGAAAUCGGUUA	46	5	4649.17	102.282	2623.06	93.7606	experimental
1401	xbz_11316	GUUUCCGUAGUGUAGUGGUUAUCACGUUU	46	6	15798.5	195.082	9059.85	160.074	experimental
1402	he_47085	GGGGGUAUAGCUCAGGGGUAGAGCAUCG	46	7	28443.8	165.323	25470.1	292.901	experimental
1403	he_13939	GCCCCAGUUGCCUAAUGGAUAAGGCACUG	46	8	752.528	39.8243	311.046	21.1737	experimental
1404	he_52022	CGUCCCGCUCCGGGGACAGUG	46	9	421.13	28.2221	417.991	24.7777	experimental
1405	he_15200	UACUAAACUCACAAGCGUACCUCCUAUUU	46	10	162.593	8.84343	33.7593	2.52046	experimental
1406	a-PUC2MM2d		46	11	479.741	32.7158	702.12	68.3669	control	control_spike-calibration	LC Internal Use
1407	xbz_8958	GGCCAGUUGGUGAAGCAGUU	46	12	1997.08	70.3784	530.972	56.4805	experimental
1408	xbz_26760	AGUUGGUUACAGCUUGGUGU	46	13	154.926	10.1721	34.5648	1.76293	experimental
1409	xbz_9344	CACUAGAUUGUGAGCUCCUGGA	46	14	422.583	28.0604	121.528	18.4616	experimental
1410	he_49836	UAGCACCAUCUGAAAUCGGUUA	46	15	4527.92	77.3769	2584.08	66.4257	experimental
1411	xbz_11316	GUUUCCGUAGUGUAGUGGUUAUCACGUUU	46	16	15224.8	147.041	9307.29	191.014	experimental
1412	he_47085	GGGGGUAUAGCUCAGGGGUAGAGCAUCG	46	17	27363.3	179.572	25343	231.905	experimental
1413	he_13939	GCCCCAGUUGCCUAAUGGAUAAGGCACUG	46	18	719.148	51.2931	333.407	32.4054	experimental
1414	he_52022	CGUCCCGCUCCGGGGACAGUG	46	19	376.62	22.3154	461.269	31.6705	experimental
1415	he_15200	UACUAAACUCACAAGCGUACCUCCUAUUU	46	20	156.537	6.28665	36.1759	1.89849	experimental
1416	a-PUC2MM2d		46	21	804.583	39.784	1357.05	56.4316	control	control_spike-calibration	LC Internal Use
1417	xbz_8958	GGCCAGUUGGUGAAGCAGUU	46	22	2228.44	51.219	673.778	60.4079	experimental
1418	xbz_26760	AGUUGGUUACAGCUUGGUGU	46	23	151.778	7.39074	37.3889	3.09607	experimental
1419	xbz_9344	CACUAGAUUGUGAGCUCCUGGA	46	24	392.176	23.169	126.12	10.8591	experimental
1420	he_49836	UAGCACCAUCUGAAAUCGGUUA	46	25	4341.4	98.0042	2373.5	59.2314	experimental
1421	xbz_11316	GUUUCCGUAGUGUAGUGGUUAUCACGUUU	46	26	14538.9	181.192	8662.19	94.8948	experimental
1422	he_47085	GGGGGUAUAGCUCAGGGGUAGAGCAUCG	46	27	26248.8	286.279	24766.3	227.052	experimental
1423	he_13939	GCCCCAGUUGCCUAAUGGAUAAGGCACUG	46	28	728.463	45.4805	371.769	24.5172	experimental
1424	he_52022	CGUCCCGCUCCGGGGACAGUG	46	29	406.102	31.9351	510.463	45.4751	experimental
1425	he_15200	UACUAAACUCACAAGCGUACCUCCUAUUU	46	30	152.241	5.85633	31.2315	2.13387	experimental
1426	a-PUC2MM2d		46	31	870.667	62.4878	1520.3	137.567	control	control_spike-calibration	LC Internal Use
1427	Ctr01-2P		47	1	2141.27	64.9356	589.602	42.6115	control	control_spike-calibration	LC Internal Use
1428	xbz_10964	CAGGGCGCACCACCGGCCCG	47	2	391.37	26.8264	919.843	56.1107	experimental
1429	xbz_21134	CUGGAGAUAUGGAAGAGCUGUGU	47	3	165.667	8.91601	34.7593	2.61151	experimental
1430	xbz_3733	UAAGGUGCAUCUAGUGCAGAU	47	4	325.741	15.4299	75.7778	7.85063	experimental
1431	he_27523	CAAAGAAUUCUCCUUUUGGGCUU	47	5	243.722	17.7884	51.9259	9.39646	experimental
1432	xbz_12781	GGGGGCAUAGCUCAGUGGUAGAGCAUUU	47	6	19089.5	206.409	16199.7	265.507	experimental
1433	he_47213	GUUUCCGUAGUGUAGUGGUCAUCACGUUC	47	7	19149.9	224.969	12377.8	260.361	experimental
1434	he_14017	CCCCUGGUGGUCUAGUGGUUAGGAUUCGG	47	8	48287.1	234.477	30715.4	473.26	experimental
1435	he_53549	GGGAGCCAGGAAGUAUUGAUGUU	47	9	394.5	25.2581	136.843	14.0348	experimental
1436	he_15201	CAAACAGAUUAAGACAUGGGAGGUAUG	47	10	160.056	6.76554	46.8241	5.07298	experimental
1437	Ctr01-2P		47	11	2103.61	83.1054	634.593	47.557	control	control_spike-calibration	LC Internal Use
1438	xbz_10964	CAGGGCGCACCACCGGCCCG	47	12	404.694	21.9023	850.824	52.8156	experimental
1439	xbz_21134	CUGGAGAUAUGGAAGAGCUGUGU	47	13	159.213	10.5432	38.0741	2.25357	experimental
1440	xbz_3733	UAAGGUGCAUCUAGUGCAGAU	47	14	327.213	24.5776	79.0093	12.6539	experimental
1441	he_27523	CAAAGAAUUCUCCUUUUGGGCUU	47	15	220.315	12.0246	43.9537	4.50624	experimental
1442	xbz_12781	GGGGGCAUAGCUCAGUGGUAGAGCAUUU	47	16	18611.4	208.737	16904.1	262.477	experimental
1443	he_47213	GUUUCCGUAGUGUAGUGGUCAUCACGUUC	47	17	18480.1	199.821	12872.4	180.072	experimental
1444	he_14017	CCCCUGGUGGUCUAGUGGUUAGGAUUCGG	47	18	45818.8	1803.02	29688.9	1854.5	experimental
1445	he_53549	GGGAGCCAGGAAGUAUUGAUGUU	47	19	334.389	21.7212	141.88	16.4565	experimental
1446	he_15201	CAAACAGAUUAAGACAUGGGAGGUAUG	47	20	153.824	6.51788	50.4259	5.63236	experimental
1447	Ctr01-2P		47	21	2057.75	85.2997	670.704	36.1317	control	control_spike-calibration	LC Internal Use
1448	xbz_10964	CAGGGCGCACCACCGGCCCG	47	22	376.389	15.9138	820.824	38.9183	experimental
1449	xbz_21134	CUGGAGAUAUGGAAGAGCUGUGU	47	23	153.019	10.4729	36.3241	2.11726	experimental
1450	xbz_3733	UAAGGUGCAUCUAGUGCAGAU	47	24	305.759	24.5196	72.75	10.482	experimental
1451	he_27523	CAAAGAAUUCUCCUUUUGGGCUU	47	25	238.685	17.0226	50.8889	4.88242	experimental
1452	xbz_12781	GGGGGCAUAGCUCAGUGGUAGAGCAUUU	47	26	17797.8	185.353	15404	262.755	experimental
1453	he_47213	GUUUCCGUAGUGUAGUGGUCAUCACGUUC	47	27	17611.7	193.706	12317.8	283.256	experimental
1454	he_14017	CCCCUGGUGGUCUAGUGGUUAGGAUUCGG	47	28	44279.1	226.446	30153.8	371.916	experimental
1455	he_53549	GGGAGCCAGGAAGUAUUGAUGUU	47	29	360.269	18.7933	150.889	14.2379	experimental
1456	he_15201	CAAACAGAUUAAGACAUGGGAGGUAUG	47	30	151.944	7.84527	54.3796	8.4419	experimental
1457	Ctr01-2P		47	31	2002.41	74.6821	648.852	54.2593	control	control_spike-calibration	LC Internal Use
1458	Ctr01-2M05		48	1	162.25	8.54469	34.1019	1.71273	control	control_spike-calibration	LC Internal Use
1459	xbz_13756	AGAGGUAGUAGGUUGCAUAGUU	48	2	16743.5	217.288	26345.3	566.653	experimental
1460	xbz_23885	CGGGUUGUGGGCAUUCU	48	3	177.13	8.29941	37.5278	1.66581	experimental
1461	xbz_6871	AUAGGUAUGGGACAAAUUUA	48	4	164.972	7.58313	34.9352	2.76923	experimental
1462	he_53133	UGAGGUAGUAGAUUGUAUAGUUU	48	5	16169.5	201.33	25200.2	250.385	experimental
1463	xbz_14113	UGGUAUAUAGUUUAAACAAAACGAAUG	48	6	291.426	25.4317	62.0833	8.01299	experimental
1464	he_47479	GGGGAAUUAGCUCAAAUGGUAGAGCGCUC	48	7	6193.77	118.464	3288.53	129.879	experimental
1465	he_14371	GAUGAUGAUGAGAAGCCUUUUGCUGAGC	48	8	171.731	6.81889	41.9167	2.42697	experimental
1466	he_34409	UUCUGUGAUGAAAAUGCUGAAG	48	9	160.75	6.2966	36.0833	2.12737	experimental
1467	he_52822	CAGAGAAUAGUUUAAAUUAGAAUCUUA	48	10	184.972	9.28012	38.5278	2.87905	experimental
1468	Ctr01-2M05		48	11	154.417	7.92621	34.6389	1.97393	control	control_spike-calibration	LC Internal Use
1469	xbz_13756	AGAGGUAGUAGGUUGCAUAGUU	48	12	16465.1	258.034	25291.9	322.209	experimental
1470	xbz_23885	CGGGUUGUGGGCAUUCU	48	13	174.398	7.20973	40.6852	4.37206	experimental
1471	xbz_6871	AUAGGUAUGGGACAAAUUUA	48	14	152.861	10.0266	35.0833	2.17516	experimental
1472	he_53133	UGAGGUAGUAGAUUGUAUAGUUU	48	15	15780.5	214.239	24719.2	308.156	experimental
1473	xbz_14113	UGGUAUAUAGUUUAAACAAAACGAAUG	48	16	300.315	12.0106	57.4537	6.67032	experimental
1474	he_47479	GGGGAAUUAGCUCAAAUGGUAGAGCGCUC	48	17	6146.51	183.956	3823.45	210.569	experimental
1475	he_14371	GAUGAUGAUGAGAAGCCUUUUGCUGAGC	48	18	145.361	11.6975	43.9352	3.49706	experimental
1476	he_34409	UUCUGUGAUGAAAAUGCUGAAG	48	19	151.583	10.3906	35.0185	4.01162	experimental
1477	he_52822	CAGAGAAUAGUUUAAAUUAGAAUCUUA	48	20	171.343	9.80479	41.7315	5.92729	experimental
1478	Ctr01-2M05		48	21	146.935	6.78822	36.1019	2.04592	control	control_spike-calibration	LC Internal Use
1479	xbz_13756	AGAGGUAGUAGGUUGCAUAGUU	48	22	15725.9	141.446	23554.8	288.592	experimental
1480	xbz_23885	CGGGUUGUGGGCAUUCU	48	23	168.398	8.48632	38.3519	2.88183	experimental
1481	xbz_6871	AUAGGUAUGGGACAAAUUUA	48	24	142.093	6.50167	36.6111	1.7012	experimental
1482	he_53133	UGAGGUAGUAGAUUGUAUAGUUU	48	25	15157.6	150.892	22327.6	292.739	experimental
1483	xbz_14113	UGGUAUAUAGUUUAAACAAAACGAAUG	48	26	379.12	22.9423	71.6296	8.8271	experimental
1484	he_47479	GGGGAAUUAGCUCAAAUGGUAGAGCGCUC	48	27	5860.37	102.403	3603.81	102.085	experimental
1485	he_14371	GAUGAUGAUGAGAAGCCUUUUGCUGAGC	48	28	153.194	5.07045	42.787	4.31916	experimental
1486	he_34409	UUCUGUGAUGAAAAUGCUGAAG	48	29	154.509	4.93603	34.6111	2.37917	experimental
1487	he_52822	CAGAGAAUAGUUUAAAUUAGAAUCUUA	48	30	181.722	15.115	43.25	5.95642	experimental
1488	Ctr01-2M05		48	31	147.481	6.89369	32.5926	1.45998	control	control_spike-calibration	LC Internal Use
1489	Ctr01-2M10		49	1	158.806	10.8537	33.713	2.01421	control	control_spike-calibration	LC Internal Use
1490	xbz_3606	UAAUUUCAUCAUCCUCAGUCA	49	2	169.269	7.36449	32.3426	1.49867	experimental
1491	xbz_21086	AGGGCUUAGCUGCUUGUGAGCA	49	3	273.454	19.1255	39.2963	2.97422	experimental
1492	xbz_3197	UAGUUUGAUUACUAGCACUUGU	49	4	165.991	7.54735	37.1296	2.44984	experimental
1493	he_31641	UGAGGUAGUAGGUUGUAUAGUUUA	49	5	17733.6	157.081	28133.2	296.958	experimental
1494	xbz_14128	AUUGUGAAUCUGACAACAGAGGCUUA	49	6	13150.5	178.403	5822.29	147.882	experimental
1495	he_47496	GCUUCUGUAGUGUAGUGGUUAUCACGUUC	49	7	10490.6	111.944	2945.56	128.245	experimental
1496	he_14386	AUCACUGAUGUCUCCAUGUCUCUGAGCAA	49	8	226.787	12.6262	5664.72	167.155	experimental
1497	he_42208	GGAGGAACCUUGGAGCUUCGGC	49	9	164.13	6.56398	37.6019	2.37172	experimental
1498	he_52722	AGCUCCGAGGUGAUUUUCAUAUUGAA	49	10	1012.57	74.414	169.074	22.8259	experimental
1499	Ctr01-2M10		49	11	153.352	6.34567	34.0556	1.89359	control	control_spike-calibration	LC Internal Use
1500	xbz_3606	UAAUUUCAUCAUCCUCAGUCA	49	12	156.759	8.89069	36.6759	2.52401	experimental
1501	xbz_21086	AGGGCUUAGCUGCUUGUGAGCA	49	13	256.37	13.7505	38.6111	2.08167	experimental
1502	xbz_3197	UAGUUUGAUUACUAGCACUUGU	49	14	161.861	9.31631	36.7407	2.58453	experimental
1503	he_31641	UGAGGUAGUAGGUUGUAUAGUUUA	49	15	17207.8	122.26	27427.1	270.035	experimental
1504	xbz_14128	AUUGUGAAUCUGACAACAGAGGCUUA	49	16	12492.7	175.405	5783.19	165.656	experimental
1505	he_47496	GCUUCUGUAGUGUAGUGGUUAUCACGUUC	49	17	10328.8	133.515	3239.72	70.9212	experimental
1506	he_14386	AUCACUGAUGUCUCCAUGUCUCUGAGCAA	49	18	185.62	12.5948	6015.42	130.647	experimental
1507	he_42208	GGAGGAACCUUGGAGCUUCGGC	49	19	152.481	8.75895	38.2315	3.12543	experimental
1508	he_52722	AGCUCCGAGGUGAUUUUCAUAUUGAA	49	20	1174.1	76.2721	238.361	23.3848	experimental
1509	Ctr01-2M10		49	21	149.963	8.79563	34.3704	1.83218	control	control_spike-calibration	LC Internal Use
1510	xbz_3606	UAAUUUCAUCAUCCUCAGUCA	49	22	151.287	6.68105	35.0833	2.87797	experimental
1511	xbz_21086	AGGGCUUAGCUGCUUGUGAGCA	49	23	237.259	13.8357	39.1111	3.19267	experimental
1512	xbz_3197	UAGUUUGAUUACUAGCACUUGU	49	24	158.926	11.1042	35.3056	2.45885	experimental
1513	he_31641	UGAGGUAGUAGGUUGUAUAGUUUA	49	25	16427.7	190.11	24496.8	244.893	experimental
1514	xbz_14128	AUUGUGAAUCUGACAACAGAGGCUUA	49	26	12143.4	126.107	5467.05	131.547	experimental
1515	he_47496	GCUUCUGUAGUGUAGUGGUUAUCACGUUC	49	27	9935.34	134.854	3244.77	91.633	experimental
1516	he_14386	AUCACUGAUGUCUCCAUGUCUCUGAGCAA	49	28	218.426	17.0952	5621.77	113.588	experimental
1517	he_42208	GGAGGAACCUUGGAGCUUCGGC	49	29	154.306	6.09958	35.9167	2.37245	experimental
1518	he_52722	AGCUCCGAGGUGAUUUUCAUAUUGAA	49	30	1189.13	60.3335	277.231	23.8498	experimental
1519	Ctr01-2M10		49	31	150.852	8.73259	33.1111	3.04586	control	control_spike-calibration	LC Internal Use
1520	Ctr02-2P		50	1	159.926	7.01228	32.9815	1.83925	control	control_spike-calibration	LC Internal Use
1521	xbz_11312	AUAACAUUGUAAAGCGCUUCUU	50	2	161.333	5.98128	33.5278	2.02535	experimental
1522	xbz_29532	CAAGUCACUAGUGGUUCCGUUU	50	3	4478.4	118.446	3831.85	132.255	experimental
1523	xbz_2993	UCAGUGCAUCACAGAACUUUGU	50	4	418.87	38.0354	122.815	11.4158	experimental
1524	he_28712	ACCAUCGACCGUUGAUUGUACC	50	5	172.37	9.46868	38.8426	2.75193	experimental
1525	xbz_14675	GCCCUGUGGUCUAGUGGUUAGGAUUCUG	50	6	40762.8	225.972	31056.1	527.267	experimental
1526	he_47498	GCCUGGGUAGCUCAGUCGGUAGAGCAUCA	50	7	11761.7	123.179	5946.13	136.113	experimental
1527	he_14393	GGAGGUGAUGAACUGUCUGAGCCUGACC	50	8	175.056	6.78486	952.62	57.1119	experimental
1528	he_4491	CUUUGCACGCGUGGGUUCGAAUCCCA	50	9	710.019	33.0971	513.944	26.726	experimental
1529	he_25690	GUUAAGAUGGCAGAGCCCGGUAAUCG	50	10	20730	145.277	20928.9	333.848	experimental
1530	Ctr02-2P		50	11	158.991	6.18786	38.5093	3.90422	control	control_spike-calibration	LC Internal Use
1531	xbz_11312	AUAACAUUGUAAAGCGCUUCUU	50	12	151.028	9.8003	35.1111	2.31748	experimental
1532	xbz_29532	CAAGUCACUAGUGGUUCCGUUU	50	13	4335.35	111.007	3540.12	157.704	experimental
1533	xbz_2993	UCAGUGCAUCACAGAACUUUGU	50	14	434.583	41.3969	131.685	14.2111	experimental
1534	he_28712	ACCAUCGACCGUUGAUUGUACC	50	15	151.519	9.16564	37.8611	2.69114	experimental
1535	xbz_14675	GCCCUGUGGUCUAGUGGUUAGGAUUCUG	50	16	39189.6	157.172	30521.1	280.52	experimental
1536	he_47498	GCCUGGGUAGCUCAGUCGGUAGAGCAUCA	50	17	11210.5	149.186	6436.79	133.365	experimental
1537	he_14393	GGAGGUGAUGAACUGUCUGAGCCUGACC	50	18	152.935	7.63694	1010.92	90.4147	experimental
1538	he_4491	CUUUGCACGCGUGGGUUCGAAUCCCA	50	19	688.639	53.5995	520.194	26.1042	experimental
1539	he_25690	GUUAAGAUGGCAGAGCCCGGUAAUCG	50	20	19500.3	204.029	20621.5	256.696	experimental
1540	Ctr02-2P		50	21	153.093	8.59965	36.4444	1.77907	control	control_spike-calibration	LC Internal Use
1541	xbz_11312	AUAACAUUGUAAAGCGCUUCUU	50	22	144.5	7.27883	35.6852	3.26021	experimental
1542	xbz_29532	CAAGUCACUAGUGGUUCCGUUU	50	23	4189.2	104.618	3380.3	105.677	experimental
1543	xbz_2993	UCAGUGCAUCACAGAACUUUGU	50	24	401.361	24.9326	140.75	20.653	experimental
1544	he_28712	ACCAUCGACCGUUGAUUGUACC	50	25	157.093	6.97464	39.3611	2.28959	experimental
1545	xbz_14675	GCCCUGUGGUCUAGUGGUUAGGAUUCUG	50	26	37120.2	148.818	27658.6	190.509	experimental
1546	he_47498	GCCUGGGUAGCUCAGUCGGUAGAGCAUCA	50	27	11037.7	123.54	6299.17	112.882	experimental
1547	he_14393	GGAGGUGAUGAACUGUCUGAGCCUGACC	50	28	157.454	7.27611	938.213	31.2368	experimental
1548	he_4491	CUUUGCACGCGUGGGUUCGAAUCCCA	50	29	671.917	32.3206	569.935	36.1666	experimental
1549	he_25690	GUUAAGAUGGCAGAGCCCGGUAAUCG	50	30	18772.6	226.325	20739	216.281	experimental
1550	Ctr02-2P		50	31	153.157	7.47727	34.0278	2.46265	control	control_spike-calibration	LC Internal Use
1551	Ctr02-2M05		51	1	164.102	8.88129	31.537	1.85163	control	control_spike-calibration	LC Internal Use
1552	xbz_7667	AGCAGCAUUGUACAGGGCUAUGAAA	51	2	1540.69	76.8982	839.426	56.9256	experimental
1553	xbz_29172	AGCUACAUUGUCUGCUGGGUUU	51	3	2151.65	89.4816	1119.34	63.4751	experimental
1554	xbz_8237	AAAGGAAAAGUUUCUUUGCU	51	4	162.083	9.89395	34.7685	1.73263	experimental
1555	he_36376	AAGCUGCCAGUUGAAGAACUGU	51	5	806.685	41.8934	240.398	24.9672	experimental
1556	he_27079	UUCACUGAUGAGAGCAUUGUUCUGAGC	51	6	178.491	7.65188	97.4352	9.97218	experimental
1557	he_47500	CUCGAAGAUAUAUGUAUAUAUCCUCU	51	7	164.657	5.87592	36.7407	1.64839	experimental
1558	he_14400	UUCUCUGGCGCAAUGGAUAGCGCAUU	51	8	169.324	6.33316	37.6944	1.93085	experimental
1559	he_6837	ACUGCAUUAUGAGCACUUAAAGUA	51	9	169.25	12.4098	34.1481	1.82309	experimental
1560	he_25748	AACAGCUAUCCAUUGGUCUUAGGCCCCA	51	10	4150.69	65.0149	1322.17	68.0958	experimental
1561	Ctr02-2M05		51	11	157.88	7.01363	32.3426	2.85199	control	control_spike-calibration	LC Internal Use
1562	xbz_7667	AGCAGCAUUGUACAGGGCUAUGAAA	51	12	1488.15	80.2971	737.472	55.2089	experimental
1563	xbz_29172	AGCUACAUUGUCUGCUGGGUUU	51	13	2097.1	61.9474	1057.63	58.3293	experimental
1564	xbz_8237	AAAGGAAAAGUUUCUUUGCU	51	14	146.352	7.79206	34.8148	2.13624	experimental
1565	he_36376	AAGCUGCCAGUUGAAGAACUGU	51	15	724.972	51.9267	218.981	28.8191	experimental
1566	he_27079	UUCACUGAUGAGAGCAUUGUUCUGAGC	51	16	157.241	8.05689	82.8981	9.77307	experimental
1567	he_47500	CUCGAAGAUAUAUGUAUAUAUCCUCU	51	17	144.565	6.57135	35.1574	1.6186	experimental
1568	he_14400	UUCUCUGGCGCAAUGGAUAGCGCAUU	51	18	151.102	11.288	37.1852	2.96127	experimental
1569	he_6837	ACUGCAUUAUGAGCACUUAAAGUA	51	19	146.454	7.30687	33.3889	2.36735	experimental
1570	he_25748	AACAGCUAUCCAUUGGUCUUAGGCCCCA	51	20	3877.45	125.384	1415.4	38.3873	experimental
1571	Ctr02-2M05		51	21	146.676	8.42319	34.4815	2.95917	control	control_spike-calibration	LC Internal Use
1572	xbz_7667	AGCAGCAUUGUACAGGGCUAUGAAA	51	22	1391.56	61.9631	749.074	63.6184	experimental
1573	xbz_29172	AGCUACAUUGUCUGCUGGGUUU	51	23	2081.64	84.6023	1029.21	67.9623	experimental
1574	xbz_8237	AAAGGAAAAGUUUCUUUGCU	51	24	154.278	5.90712	34.6389	2.9654	experimental
1575	he_36376	AAGCUGCCAGUUGAAGAACUGU	51	25	731.167	49.5938	222.889	17.3643	experimental
1576	he_27079	UUCACUGAUGAGAGCAUUGUUCUGAGC	51	26	158	8.07558	83.5278	8.6753	experimental
1577	he_47500	CUCGAAGAUAUAUGUAUAUAUCCUCU	51	27	153.509	6.16062	36.3333	2.74117	experimental
1578	he_14400	UUCUCUGGCGCAAUGGAUAGCGCAUU	51	28	155.056	6.95759	34.6111	2.70283	experimental
1579	he_6837	ACUGCAUUAUGAGCACUUAAAGUA	51	29	151.537	10.4626	35.2037	1.24375	experimental
1580	he_25748	AACAGCUAUCCAUUGGUCUUAGGCCCCA	51	30	3809.31	128.011	1388.33	85.5758	experimental
1581	Ctr02-2M05		51	31	148.648	6.49704	33.1389	2.07098	control	control_spike-calibration	LC Internal Use
1582	Ctr02-2M10		52	1	158.204	8.67994	31.6944	2.37769	control	control_spike-calibration	LC Internal Use
1583	xbz_78	GGCUUGGUCUAGGGGUGUCAU	52	2	171.148	10.3407	44.8241	5.11335	experimental
1584	xbz_29477	CAAAACGUGAGGCGCUGCUAU	52	3	454.787	18.1015	93.0093	11.0872	experimental
1585	xbz_73	CGUUUCUUAGCAGGGCUU	52	4	180.509	9.13092	101.185	12.2773	experimental
1586	he_37062	UACCCUGUAGAUCCGAAUUUGU	52	5	866.5	49.8792	244.398	31.3085	experimental
1587	he_27218	CUUCUUACUACUGCACUUGACUAGUCU	52	6	7193.6	120.107	800.046	49.7244	experimental
1588	he_47505	GCCUGGAUAGCUCAGUCGGUAGAGCAUCAG	52	7	12941.6	130.121	7724.07	76.0408	experimental
1589	he_15624	CGGGAUGCCUGGGAGUUGCGAUCUGCCCG	52	8	1004.44	25.5889	853.463	14.116	experimental
1590	he_11181	CAUGGUGAGGAUGGGGUCGGAGG	52	9	3528.81	95.6268	9145.03	124.322	experimental
1591	he_25747	GAGAAAGCUCACAAGAACUGCUAACU	52	10	14616.5	192.727	4172.54	128.543	experimental
1592	Ctr02-2M10		52	11	160.676	6.66814	33.0556	2.55714	control	control_spike-calibration	LC Internal Use
1593	xbz_78	GGCUUGGUCUAGGGGUGUCAU	52	12	162.046	6.91522	42.7407	3.93966	experimental
1594	xbz_29477	CAAAACGUGAGGCGCUGCUAU	52	13	416.667	20.4478	82.2963	7.28622	experimental
1595	xbz_73	CGUUUCUUAGCAGGGCUU	52	14	177.102	7.99526	101.407	10.1005	experimental
1596	he_37062	UACCCUGUAGAUCCGAAUUUGU	52	15	835.954	59.1992	238.194	23.9834	experimental
1597	he_27218	CUUCUUACUACUGCACUUGACUAGUCU	52	16	6741	144.631	811.222	60.965	experimental
1598	he_47505	GCCUGGAUAGCUCAGUCGGUAGAGCAUCAG	52	17	12476.1	151.564	8483.8	169.199	experimental
1599	he_15624	CGGGAUGCCUGGGAGUUGCGAUCUGCCCG	52	18	924.222	44.5069	901.565	36.3692	experimental
1600	he_11181	CAUGGUGAGGAUGGGGUCGGAGG	52	19	3586.67	82.7064	10063.9	247.007	experimental
1601	he_25747	GAGAAAGCUCACAAGAACUGCUAACU	52	20	13758	114.482	4493.95	110.167	experimental
1602	Ctr02-2M10		52	21	149.639	6.56165	33.4815	2.26918	control	control_spike-calibration	LC Internal Use
1603	xbz_78	GGCUUGGUCUAGGGGUGUCAU	52	22	156.157	8.84356	48.7778	5.63755	experimental
1604	xbz_29477	CAAAACGUGAGGCGCUGCUAU	52	23	380.639	20.7875	88.0648	9.13069	experimental
1605	xbz_73	CGUUUCUUAGCAGGGCUU	52	24	165.639	10.1682	105.639	14.1398	experimental
1606	he_37062	UACCCUGUAGAUCCGAAUUUGU	52	25	863.333	38.2977	288.667	33.6585	experimental
1607	he_27218	CUUCUUACUACUGCACUUGACUAGUCU	52	26	6568.29	113.8	776.463	35.2893	experimental
1608	he_47505	GCCUGGAUAGCUCAGUCGGUAGAGCAUCAG	52	27	12087.5	117.364	7922.05	87.9987	experimental
1609	he_15624	CGGGAUGCCUGGGAGUUGCGAUCUGCCCG	52	28	904.917	36.937	906.111	39.5834	experimental
1610	he_11181	CAUGGUGAGGAUGGGGUCGGAGG	52	29	3480.51	75.5353	10400.8	111.918	experimental
1611	he_25747	GAGAAAGCUCACAAGAACUGCUAACU	52	30	13441.3	205.969	4463.64	101.261	experimental
1612	Ctr02-2M10		52	31	142.148	7.2264	32.6667	2.196	control	control_spike-calibration	LC Internal Use
1613	Ctr03-2P		53	1	159.889	11.3717	33.3148	2.30257	control	control_spike-calibration	LC Internal Use
1614	xbz_11894	UGAAUGAUUAAAGGUCUUGGGGC	53	2	851.019	55.4703	2030.59	95.2713	experimental
1615	xbz_16514	AGCAGCAUUGUACAGGGCUAUC	53	3	1789.42	63.2527	975.861	41.8092	experimental
1616	xbz_5186	AGGAAGGCAGCAGGCGC	53	4	3710.38	104.818	8898.72	206.54	experimental
1617	he_50188	UAGCUUGUCAGAUUAAUGUUGAUA	53	5	165.056	6.31839	38.3981	2.22114	experimental
1618	he_27706	GGGGGUAUAGCUCAGGUGGUAGAGCAUUUG	53	6	20355.1	160.933	17255	248.172	experimental
1619	he_47509	UCUCUAUUUGAACCAGAUAGGACUUUUG	53	7	168.583	7.90614	39.9537	2.46995	experimental
1620	he_15724	GGCUCGUUGGUCUAGGGGUAUGAUCCU	53	8	41969.4	253.506	45266.7	617.511	experimental
1621	he_5221	CUGGCUUUUUACCGGAAAGCCCC	53	9	189.324	7.5959	52.287	7.35743	experimental
1622	he_25668	CACUGAAAAUGUUUAGACGGGCU	53	10	18782.2	166.12	18899	217.53	experimental
1623	Ctr03-2P		53	11	157.972	8.07495	37.4907	2.14213	control	control_spike-calibration	LC Internal Use
1624	xbz_11894	UGAAUGAUUAAAGGUCUUGGGGC	53	12	858.407	38.3947	1809.65	80.2804	experimental
1625	xbz_16514	AGCAGCAUUGUACAGGGCUAUC	53	13	1749.73	64.2809	869.472	43.7571	experimental
1626	xbz_5186	AGGAAGGCAGCAGGCGC	53	14	3559.79	114.425	8418.48	253.569	experimental
1627	he_50188	UAGCUUGUCAGAUUAAUGUUGAUA	53	15	148.315	8.80277	37.5093	1.83168	experimental
1628	he_27706	GGGGGUAUAGCUCAGGUGGUAGAGCAUUUG	53	16	19733.5	287.955	17753.1	312.093	experimental
1629	he_47509	UCUCUAUUUGAACCAGAUAGGACUUUUG	53	17	148.907	11.1251	38.6111	2.96343	experimental
1630	he_15724	GGCUCGUUGGUCUAGGGGUAUGAUCCU	53	18	39312.7	216.621	43612.7	523.305	experimental
1631	he_5221	CUGGCUUUUUACCGGAAAGCCCC	53	19	158.648	10.1763	44.6481	4.00307	experimental
1632	he_25668	CACUGAAAAUGUUUAGACGGGCU	53	20	17692.5	303.286	19809.7	378.058	experimental
1633	Ctr03-2P		53	21	148.222	9.87902	37.1574	3.04533	control	control_spike-calibration	LC Internal Use
1634	xbz_11894	UGAAUGAUUAAAGGUCUUGGGGC	53	22	874.259	45.8896	2093.22	42.6238	experimental
1635	xbz_16514	AGCAGCAUUGUACAGGGCUAUC	53	23	1682.81	66.5386	894.111	54.8969	experimental
1636	xbz_5186	AGGAAGGCAGCAGGCGC	53	24	3322.96	77.4641	7832.75	228.474	experimental
1637	he_50188	UAGCUUGUCAGAUUAAUGUUGAUA	53	25	155.546	10.0609	38.6389	1.7101	experimental
1638	he_27706	GGGGGUAUAGCUCAGGUGGUAGAGCAUUUG	53	26	18566.9	190.252	15871.5	221.473	experimental
1639	he_47509	UCUCUAUUUGAACCAGAUAGGACUUUUG	53	27	150.685	5.60482	39.037	1.73435	experimental
1640	he_15724	GGCUCGUUGGUCUAGGGGUAUGAUCCU	53	28	37636	191.541	44043	332.308	experimental
1641	he_5221	CUGGCUUUUUACCGGAAAGCCCC	53	29	173.87	9.16423	49.713	5.3268	experimental
1642	he_25668	CACUGAAAAUGUUUAGACGGGCU	53	30	17160.5	256.909	19409.9	406.083	experimental
1643	Ctr03-2P		53	31	153.278	7.96468	34.1852	2.697	control	control_spike-calibration	LC Internal Use
1644	Ctr03-2M05		54	1	157.259	8.99363	33.2222	1.87125	control	control_spike-calibration	LC Internal Use
1645	xbz_5371	UGGGUCUUUGCGGGCGAGAUGA	54	2	345.269	20.3812	201.991	17.1107	experimental
1646	xbz_29478	CAGCAGCAAUUCAUGUUUUGA	54	3	202.13	13.327	47.6759	8.9305	experimental
1647	xbz_7657	UUCUCUGGCGCAAUGGAUAGC	54	4	164.389	8.99619	33.9907	2.08912	experimental
1648	he_48741	AGUUGGUUACAGCUUGGUGU	54	5	167.259	5.95681	35.0741	2.04027	experimental
1649	he_27831	AGCUGUGAUGCCCACCUGUUUACCUGAGA	54	6	197.593	7.90603	47.3889	3.35955	experimental
1650	he_47514	ACCGGGAUGGCCGAGUGGUUAAGGCGUUGG	54	7	8359.84	137.673	8584.5	233.365	experimental
1651	he_16347	AAAUAUGAUGAGUGUACAAAAUCUUGAUU	54	8	171.426	12.1787	69.9167	7.728	experimental
1652	he_11662	UUCAGGUCCCUGUUGGGCUCCA	54	9	169.102	6.29039	35.8056	2.07998	experimental
1653	he_25728	ACUCUUUUAGUAUAAAUAGUACCGUU	54	10	9106.77	196.156	527.407	59.5087	experimental
1654	Ctr03-2M05		54	11	152.361	6.81458	33.8704	2.37232	control	control_spike-calibration	LC Internal Use
1655	xbz_5371	UGGGUCUUUGCGGGCGAGAUGA	54	12	344.824	36.129	191.852	24.8516	experimental
1656	xbz_29478	CAGCAGCAAUUCAUGUUUUGA	54	13	211.648	17.6171	46.5278	5.14547	experimental
1657	xbz_7657	UUCUCUGGCGCAAUGGAUAGC	54	14	155.12	8.59115	35.1481	2.24988	experimental
1658	he_48741	AGUUGGUUACAGCUUGGUGU	54	15	150.519	7.22079	33.5185	1.97404	experimental
1659	he_27831	AGCUGUGAUGCCCACCUGUUUACCUGAGA	54	16	163.889	6.18762	43.2963	3.53688	experimental
1660	he_47514	ACCGGGAUGGCCGAGUGGUUAAGGCGUUGG	54	17	8004.2	156.313	9242.36	278.622	experimental
1661	he_16347	AAAUAUGAUGAGUGUACAAAAUCUUGAUU	54	18	141.315	9.67572	63.3333	5.33723	experimental
1662	he_11662	UUCAGGUCCCUGUUGGGCUCCA	54	19	148.926	8.68849	34.9537	1.85142	experimental
1663	he_25728	ACUCUUUUAGUAUAAAUAGUACCGUU	54	20	10166	438.997	719.176	52.9889	experimental
1664	Ctr03-2M05		54	21	144.731	6.49026	35.6111	2.33556	control	control_spike-calibration	LC Internal Use
1665	xbz_5371	UGGGUCUUUGCGGGCGAGAUGA	54	22	332.278	27.1599	203.546	23.5861	experimental
1666	xbz_29478	CAGCAGCAAUUCAUGUUUUGA	54	23	212.676	20.1169	53.963	6.79599	experimental
1667	xbz_7657	UUCUCUGGCGCAAUGGAUAGC	54	24	144.787	8.62408	34.5741	2.01955	experimental
1668	he_48741	AGUUGGUUACAGCUUGGUGU	54	25	154.037	7.8917	36.6204	2.42925	experimental
1669	he_27831	AGCUGUGAUGCCCACCUGUUUACCUGAGA	54	26	175.324	5.78239	51.5278	5.00553	experimental
1670	he_47514	ACCGGGAUGGCCGAGUGGUUAAGGCGUUGG	54	27	7764.55	99.6188	9008.33	189.573	experimental
1671	he_16347	AAAUAUGAUGAGUGUACAAAAUCUUGAUU	54	28	145.898	5.1699	72.25	9.69837	experimental
1672	he_11662	UUCAGGUCCCUGUUGGGCUCCA	54	29	146.222	8.64171	33.2037	2.42941	experimental
1673	he_25728	ACUCUUUUAGUAUAAAUAGUACCGUU	54	30	10981.8	340.46	858.194	73.1335	experimental
1674	Ctr03-2M05		54	31	146.898	8.59356	34.5278	2.32603	control	control_spike-calibration	LC Internal Use
1675	Ctr03-2M10		55	1	160.139	6.36059	32.0926	1.77489	control	control_spike-calibration	LC Internal Use
1676	xbz_4627	UUUGUUGCCAUUGCAGGAU	55	2	159.944	6.60478	34.4352	2.52566	experimental
1677	xbz_20113	CAGCAGCACACUGUGGUUUGU	55	3	173.111	10.4097	42.2222	3.81422	experimental
1678	xbz_630	UCUUCUCUGUUUUGGCCAUGU	55	4	160.259	7.64806	32.8981	1.75584	experimental
1679	he_36383	UAACAGUCUACAGCCAUGGUCGC	55	5	657.241	56.9628	232.88	26.5322	experimental
1680	he_28329	CUCUGUGGCGCAAUGGACGAGCGCGCUG	55	6	186.296	7.39697	42.7407	4.96223	experimental
1681	he_47519	GGCCCCAUGGUGUAAUGGUCAGCACUCUG	55	7	13536	180.167	5508.9	150.527	experimental
1682	he_16349	GCAAAUGAUGAUAAACUGGAUCUGACU	55	8	187.537	9.97232	2156.39	126.633	experimental
1683	he_17291	GUUUCCCAGCCAACGCACCA	55	9	3549.53	71.2796	419.639	32.3698	experimental
1684	he_25733	UGGUAUAUAGUUUAAACAAAACGAAUG	55	10	280.537	15.7168	49.3704	6.42802	experimental
1685	Ctr03-2M10		55	11	158.019	8.49407	33.9815	2.49104	control	control_spike-calibration	LC Internal Use
1686	xbz_4627	UUUGUUGCCAUUGCAGGAU	55	12	155.5	9.27412	33.0185	2.17024	experimental
1687	xbz_20113	CAGCAGCACACUGUGGUUUGU	55	13	164.287	8.9234	42.3056	3.45453	experimental
1688	xbz_630	UCUUCUCUGUUUUGGCCAUGU	55	14	151.176	8.62384	35.2778	2.46028	experimental
1689	he_36383	UAACAGUCUACAGCCAUGGUCGC	55	15	576.324	38.6295	213.824	23.4165	experimental
1690	he_28329	CUCUGUGGCGCAAUGGACGAGCGCGCUG	55	16	171.324	7.6937	45.3333	6.29196	experimental
1691	he_47519	GGCCCCAUGGUGUAAUGGUCAGCACUCUG	55	17	13212.7	266.097	6026.68	135.669	experimental
1692	he_16349	GCAAAUGAUGAUAAACUGGAUCUGACU	55	18	165.167	4.49195	2276.68	99.3696	experimental
1693	he_17291	GUUUCCCAGCCAACGCACCA	55	19	3381.51	59.6128	476.759	45.2946	experimental
1694	he_25733	UGGUAUAUAGUUUAAACAAAACGAAUG	55	20	342.259	27.1439	65.6574	7.3804	experimental
1695	Ctr03-2M10		55	21	140.546	9.42197	32.6574	1.88036	control	control_spike-calibration	LC Internal Use
1696	xbz_4627	UUUGUUGCCAUUGCAGGAU	55	22	144.917	7.68677	35.4907	2.39351	experimental
1697	xbz_20113	CAGCAGCACACUGUGGUUUGU	55	23	159.324	9.08303	40.3704	6.16834	experimental
1698	xbz_630	UCUUCUCUGUUUUGGCCAUGU	55	24	149.926	5.99798	33.4074	2.06455	experimental
1699	he_36383	UAACAGUCUACAGCCAUGGUCGC	55	25	572.972	33.2609	206.815	14.2174	experimental
1700	he_28329	CUCUGUGGCGCAAUGGACGAGCGCGCUG	55	26	179.185	12.6018	46.6204	3.71085	experimental
1701	he_47519	GGCCCCAUGGUGUAAUGGUCAGCACUCUG	55	27	12973.6	155.187	6107.65	108.807	experimental
1702	he_16349	GCAAAUGAUGAUAAACUGGAUCUGACU	55	28	165.019	7.36242	2243.07	45.042	experimental
1703	he_17291	GUUUCCCAGCCAACGCACCA	55	29	3370.44	95.7638	526.546	25.3013	experimental
1704	he_25733	UGGUAUAUAGUUUAAACAAAACGAAUG	55	30	373.602	38.585	62.7222	7.83454	experimental
1705	Ctr03-2M10		55	31	140.88	5.48527	32.6481	3.38859	control	control_spike-calibration	LC Internal Use
1706	Ctr04-2P		56	1	161.435	8.67511	35.6481	2.1194	control	control_spike-calibration	LC Internal Use
1707	xbz_5349	AGCUCGGUCUGAGGCCCCUCAGU	56	2	823.463	50.1909	230.639	23.5267	experimental
1708	xbz_21465	UUGCAGCUGCCUGGGAGUGACU	56	3	261.75	20.7374	94.3611	12.026	experimental
1709	xbz_13754	UGAGGUAGUAGAUUGUAUAGUUG	56	4	15013.1	141.994	23438.8	415.595	experimental
1710	he_49811	UUUGGCACUAGCACAUUUUUGCU	56	5	183.574	8.38022	42.8519	3.09904	experimental
1711	he_28378	GCGUUGGUGGUAUAGUGGUGAGCAUAGUUG	56	6	32654.2	203.013	37915.8	887.143	experimental
1712	he_47535	GGCUCUGUGGCUUAGUUGGCUAAAGCGCCU	56	7	276.611	20.3575	48.8519	5.18592	experimental
1713	he_16687	AAAUUUUUAAGGUGGUAGUAUAAAUGG	56	8	172.833	11.7095	37.3426	2.01472	experimental
1714	he_5403	AGUUGGUUAGAGCGUGGUGCUG	56	9	178.722	8.61626	42.4444	4.98659	experimental
1715	xbz_14049	AUGUUUAGACGGGCUCAC	56	10	23460.7	227.116	14781.2	291.245	experimental
1716	Ctr04-2P		56	11	151.898	9.71071	35.3056	2.17229	control	control_spike-calibration	LC Internal Use
1717	xbz_5349	AGCUCGGUCUGAGGCCCCUCAGU	56	12	767.333	55.8797	243.093	25.899	experimental
1718	xbz_21465	UUGCAGCUGCCUGGGAGUGACU	56	13	227.472	17.2272	76.9907	8.81534	experimental
1719	xbz_13754	UGAGGUAGUAGAUUGUAUAGUUG	56	14	14054.4	188.951	21735.7	256.48	experimental
1720	he_49811	UUUGGCACUAGCACAUUUUUGCU	56	15	156.306	6.29858	40.3519	3.18089	experimental
1721	he_28378	GCGUUGGUGGUAUAGUGGUGAGCAUAGUUG	56	16	31129.2	328.743	37168.2	363.448	experimental
1722	he_47535	GGCUCUGUGGCUUAGUUGGCUAAAGCGCCU	56	17	274.315	24.1273	49.4074	5.6088	experimental
1723	he_16687	AAAUUUUUAAGGUGGUAGUAUAAAUGG	56	18	147.009	9.2165	36.713	1.94816	experimental
1724	he_5403	AGUUGGUUAGAGCGUGGUGCUG	56	19	157.741	9.01336	42.8333	4.78217	experimental
1725	xbz_14049	AUGUUUAGACGGGCUCAC	56	20	21992.8	233.42	15732.9	195.602	experimental
1726	Ctr04-2P		56	21	147.972	6.24643	37.6111	2.84764	control	control_spike-calibration	LC Internal Use
1727	xbz_5349	AGCUCGGUCUGAGGCCCCUCAGU	56	22	773.87	70.0967	232.463	26.5877	experimental
1728	xbz_21465	UUGCAGCUGCCUGGGAGUGACU	56	23	249.241	21.3856	85.5463	8.38823	experimental
1729	xbz_13754	UGAGGUAGUAGAUUGUAUAGUUG	56	24	13692.2	209.004	20702.3	242.109	experimental
1730	he_49811	UUUGGCACUAGCACAUUUUUGCU	56	25	165.352	9.64832	44.4907	5.72663	experimental
1731	he_28378	GCGUUGGUGGUAUAGUGGUGAGCAUAGUUG	56	26	29400.8	185.347	33249.7	380.633	experimental
1732	he_47535	GGCUCUGUGGCUUAGUUGGCUAAAGCGCCU	56	27	274.602	20.7121	52.8148	6.51977	experimental
1733	he_16687	AAAUUUUUAAGGUGGUAGUAUAAAUGG	56	28	150.028	6.89637	35.9907	2.0209	experimental
1734	he_5403	AGUUGGUUAGAGCGUGGUGCUG	56	29	168.944	14.2801	40.3148	3.18187	experimental
1735	xbz_14049	AUGUUUAGACGGGCUCAC	56	30	21438.2	284.95	15745.3	209.698	experimental
1736	Ctr04-2P		56	31	136.722	9.3207	33.8056	3.41371	control	control_spike-calibration	LC Internal Use
1737	Ctr04-2M05		57	1	157.509	8.26375	33.4167	1.73003	control	control_spike-calibration	LC Internal Use
1738	xbz_8656	AAGGUAGGGGAAUUUGU	57	2	167.981	8.35764	36.4444	3.31051	experimental
1739	xbz_20066	AAGCUGCCAGUUGAAGAACUGU	57	3	787.88	26.3888	232.88	24.6625	experimental
1740	xbz_2530	AGGCAGUGUAGUUAGCUGAUUGC	57	4	157.694	7.45762	36.8056	2.2855	experimental
1741	he_48830	UCCCUGUCCUCCAGGAGCUCACGU	57	5	248.167	21.5226	77.7222	9.19247	experimental
1742	he_28451	ACCCUGUGGUCUAGUGGUUAGGAGUUGG	57	6	30010.6	216.911	24047.5	385.512	experimental
1743	he_47544	GGGGGUGUAGCUCAGUGGUAGAGCGU	57	7	24579.9	147.381	24542.7	314.053	experimental
1744	he_16726	GGGGGUAUAGCUCAGUGGUUGAGCAUUUG	57	8	18292.2	233.588	14011.1	199.239	experimental
1745	he_10636	UCAACAAAAUCACUGAUGCUGGAG	57	9	193.407	11.8259	41.25	3.25584	experimental
1746	xbz_14076	GUUAAGAUGGCAGAGCCCGGU	57	10	18765.1	187.404	16103.3	236.103	experimental
1747	Ctr04-2M05		57	11	152.185	10.4597	34.8796	3.47949	control	control_spike-calibration	LC Internal Use
1748	xbz_8656	AAGGUAGGGGAAUUUGU	57	12	155.12	12.2236	37.8241	4.21796	experimental
1749	xbz_20066	AAGCUGCCAGUUGAAGAACUGU	57	13	725.954	39.6752	229.343	29.5683	experimental
1750	xbz_2530	AGGCAGUGUAGUUAGCUGAUUGC	57	14	142.194	6.41181	35.3426	1.68091	experimental
1751	he_48830	UCCCUGUCCUCCAGGAGCUCACGU	57	15	218.889	18.7623	66.7037	5.31135	experimental
1752	he_28451	ACCCUGUGGUCUAGUGGUUAGGAGUUGG	57	16	28300.8	207.055	24358.2	390.078	experimental
1753	he_47544	GGGGGUGUAGCUCAGUGGUAGAGCGU	57	17	23343.5	235.042	25157.1	312.453	experimental
1754	he_16726	GGGGGUAUAGCUCAGUGGUUGAGCAUUUG	57	18	17526.3	259.917	15031	542.569	experimental
1755	he_10636	UCAACAAAAUCACUGAUGCUGGAG	57	19	168.389	14.2899	41.0741	3.07448	experimental
1756	xbz_14076	GUUAAGAUGGCAGAGCCCGGU	57	20	17692	202.221	17184.8	220.072	experimental
1757	Ctr04-2M05		57	21	145.093	7.82942	38.3519	2.05674	control	control_spike-calibration	LC Internal Use
1758	xbz_8656	AAGGUAGGGGAAUUUGU	57	22	156.019	6.06812	40.2315	3.18174	experimental
1759	xbz_20066	AAGCUGCCAGUUGAAGAACUGU	57	23	698.12	37.0785	232.213	16.9855	experimental
1760	xbz_2530	AGGCAGUGUAGUUAGCUGAUUGC	57	24	146.241	7.09201	35.5463	2.17627	experimental
1761	he_48830	UCCCUGUCCUCCAGGAGCUCACGU	57	25	231.093	10.5463	75.3056	6.65499	experimental
1762	he_28451	ACCCUGUGGUCUAGUGGUUAGGAGUUGG	57	26	25816.1	897.817	21533.1	899.875	experimental
1763	he_47544	GGGGGUGUAGCUCAGUGGUAGAGCGU	57	27	21879.8	177.085	23383	346.907	experimental
1764	he_16726	GGGGGUAUAGCUCAGUGGUUGAGCAUUUG	57	28	16449.1	273.017	14347.5	193.874	experimental
1765	he_10636	UCAACAAAAUCACUGAUGCUGGAG	57	29	170.685	11.4465	40.0278	4.12528	experimental
1766	xbz_14076	GUUAAGAUGGCAGAGCCCGGU	57	30	17354.1	142.587	17031	256.497	experimental
1767	Ctr04-2M05		57	31	133.287	9.70408	32.9722	2.55576	control	control_spike-calibration	LC Internal Use
1768	Ctr04-2M10		58	1	157.315	7.33147	33.4722	2.76648	control	control_spike-calibration	LC Internal Use
1769	xbz_4929	AGAUGUCCGGGACUGCACGCGCG	58	2	512.472	26.8772	717.556	45.253	experimental
1770	xbz_29280	CUUAUCAGAUUGUAUUGUAAU	58	3	160.769	9.3535	34.3796	1.61023	experimental
1771	xbz_14512	AAUGGCGCCACUAGGGUUGU	58	4	191.926	12.0743	52.2315	7.55739	experimental
1772	he_38408	AGGGCUUAGCUGCUUGUGAGCA	58	5	275.176	16.9572	40.4537	2.67695	experimental
1773	he_28474	AUACAUGAUGAUCUCAAUCCAACUUG	58	6	342.778	19.6551	39573.9	453.571	experimental
1774	he_47546	GGGGGUGUAGCUCAGUGGUAGAGCACAUG	58	7	22938	216.49	21778.6	255.727	experimental
1775	he_17407	CACCAUGAUGGAACUGAGGAUCUGAGGAA	58	8	182.806	11.762	1526.84	124.453	experimental
1776	he_23832	AAGCAAAUUAUAGAGAUGAUAA	58	9	160.537	10.0962	34.9907	1.75348	experimental
1777	xbz_14129	GAGAAAGCUCACAAGAACUG	58	10	10910.6	187.416	2185.25	69.6547	experimental
1778	Ctr04-2M10		58	11	154.213	8.98602	33.8704	1.72985	control	control_spike-calibration	LC Internal Use
1779	xbz_4929	AGAUGUCCGGGACUGCACGCGCG	58	12	492.019	22.5235	659.398	36.1926	experimental
1780	xbz_29280	CUUAUCAGAUUGUAUUGUAAU	58	13	147.843	6.47953	33.5556	1.8461	experimental
1781	xbz_14512	AAUGGCGCCACUAGGGUUGU	58	14	185.898	14.7977	49.963	4.64019	experimental
1782	he_38408	AGGGCUUAGCUGCUUGUGAGCA	58	15	232.583	10.6421	37.2037	3.64489	experimental
1783	he_28474	AUACAUGAUGAUCUCAAUCCAACUUG	58	16	336.139	32.663	39585.6	425.926	experimental
1784	he_47546	GGGGGUGUAGCUCAGUGGUAGAGCACAUG	58	17	21904.7	389.082	22748.8	168.074	experimental
1785	he_17407	CACCAUGAUGGAACUGAGGAUCUGAGGAA	58	18	166.731	13.9301	1702.91	73.9384	experimental
1786	he_23832	AAGCAAAUUAUAGAGAUGAUAA	58	19	137.898	6.90651	33.3519	2.30933	experimental
1787	xbz_14129	GAGAAAGCUCACAAGAACUG	58	20	10352.5	187.932	2442.16	106.912	experimental
1788	Ctr04-2M10		58	21	143.204	8.2516	36.6111	2.32352	control	control_spike-calibration	LC Internal Use
1789	xbz_4929	AGAUGUCCGGGACUGCACGCGCG	58	22	469.713	17.9912	678.63	37.8217	experimental
1790	xbz_29280	CUUAUCAGAUUGUAUUGUAAU	58	23	145.5	6.03494	35.8241	2.60778	experimental
1791	xbz_14512	AAUGGCGCCACUAGGGUUGU	58	24	179.38	11.4473	48.1944	4.85194	experimental
1792	he_38408	AGGGCUUAGCUGCUUGUGAGCA	58	25	236.435	16.5604	39.9722	3.04931	experimental
1793	he_28474	AUACAUGAUGAUCUCAAUCCAACUUG	58	26	327.13	17.3577	35471.8	439.279	experimental
1794	he_47546	GGGGGUGUAGCUCAGUGGUAGAGCACAUG	58	27	20188.6	211.002	20896.4	225.053	experimental
1795	he_17407	CACCAUGAUGGAACUGAGGAUCUGAGGAA	58	28	170.963	10.6796	1761.89	72.2563	experimental
1796	he_23832	AAGCAAAUUAUAGAGAUGAUAA	58	29	140.602	5.34412	34.2407	2.42213	experimental
1797	xbz_14129	GAGAAAGCUCACAAGAACUG	58	30	9962.73	128.067	2411.69	109.324	experimental
1798	Ctr04-2M10		58	31	137.454	7.86615	31.8333	1.97413	control	control_spike-calibration	LC Internal Use
1799	Ctr05-2P		59	1	162.417	9.86652	33.0278	1.96919	control	control_spike-calibration	LC Internal Use
1800	xbz_8613	AGCUGGUGUUGUGAAUCAGGCCGU	59	2	171.324	8.41875	41.5648	2.59141	experimental
1801	xbz_20067	AGUUCUUCAGUGGCAAGCUUUA	59	3	185.935	9.79727	39.8519	4.27734	experimental
1802	xbz_12703	UCAAGAGCAAUAACGAAAAAUG	59	4	169.75	8.09653	35.4537	2.64181	experimental
1803	he_48076	UGUAAACAUCCUCGACUGGAAGCU	59	5	3393.44	85.6828	1705.44	78.5415	experimental
1804	he_28476	UACAAUGAUGAUAACAUAGUUCAGCAGA	59	6	204.556	11.6646	12772.1	243.308	experimental
1805	he_47550	GGGGGUAUAGCUCAGUGGUAGAGCGCGUG	59	7	20180	188.452	17426.7	203.821	experimental
1806	he_17423	AUAAAUGAUGAUCAGCAGAAUCUGAGU	59	8	161.657	7.28609	37.4352	2.33331	experimental
1807	he_22897	UUAGAUGACAUAAGCUCAGAA	59	9	162.083	7.40311	35.9537	3.36387	experimental
1808	xbz_14130	ACAGCUAUCCAUUGGUCUU	59	10	3902.34	61.4521	1420.38	51.7591	experimental
1809	Ctr05-2P		59	11	161.204	12.5964	31.4352	2.0291	control	control_spike-calibration	LC Internal Use
1810	xbz_8613	AGCUGGUGUUGUGAAUCAGGCCGU	59	12	161.509	8.8111	38.5093	3.97303	experimental
1811	xbz_20067	AGUUCUUCAGUGGCAAGCUUUA	59	13	173.083	8.60789	39.463	3.99398	experimental
1812	xbz_12703	UCAAGAGCAAUAACGAAAAAUG	59	14	153.102	6.61482	34	2	experimental
1813	he_48076	UGUAAACAUCCUCGACUGGAAGCU	59	15	3082.06	139.896	1617.88	83.0159	experimental
1814	he_28476	UACAAUGAUGAUAACAUAGUUCAGCAGA	59	16	192.898	13.1533	13256.3	254.973	experimental
1815	he_47550	GGGGGUAUAGCUCAGUGGUAGAGCGCGUG	59	17	19324.9	295.174	18851.4	219.738	experimental
1816	he_17423	AUAAAUGAUGAUCAGCAGAAUCUGAGU	59	18	136.815	10.3184	37.5185	2.69469	experimental
1817	he_22897	UUAGAUGACAUAAGCUCAGAA	59	19	137.287	10.0075	34.6667	1.47882	experimental
1818	xbz_14130	ACAGCUAUCCAUUGGUCUU	59	20	3812.08	79.3153	1662.59	45.1959	experimental
1819	Ctr05-2P		59	21	148.407	6.1356	35.0648	2.48085	control	control_spike-calibration	LC Internal Use
1820	xbz_8613	AGCUGGUGUUGUGAAUCAGGCCGU	59	22	154.657	9.80669	36.8333	3.29967	experimental
1821	xbz_20067	AGUUCUUCAGUGGCAAGCUUUA	59	23	173.833	8.22408	40.3426	3.3688	experimental
1822	xbz_12703	UCAAGAGCAAUAACGAAAAAUG	59	24	150.435	7.06217	34.8796	1.56311	experimental
1823	he_48076	UGUAAACAUCCUCGACUGGAAGCU	59	25	3010.86	96.1258	1595.38	54.6962	experimental
1824	he_28476	UACAAUGAUGAUAACAUAGUUCAGCAGA	59	26	203.926	7.36588	11768.2	148.102	experimental
1825	he_47550	GGGGGUAUAGCUCAGUGGUAGAGCGCGUG	59	27	17555	95.5262	15572.5	1603.51	experimental
1826	he_17423	AUAAAUGAUGAUCAGCAGAAUCUGAGU	59	28	145.926	6.2692	34.1111	2.02477	experimental
1827	he_22897	UUAGAUGACAUAAGCUCAGAA	59	29	147.269	11.0416	32.6574	2.11431	experimental
1828	xbz_14130	ACAGCUAUCCAUUGGUCUU	59	30	3594.44	85.3661	1602.26	110.637	experimental
1829	Ctr05-2P		59	31	138.222	8.87118	33.3241	3.04431	control	control_spike-calibration	LC Internal Use
1830	Ctr05-2M05		60	1	156.88	13.614	32.7222	1.82318	control	control_spike-calibration	LC Internal Use
1831	xbz_11341	AUAGGUAUUAAGGUUUU	60	2	160.019	3.98122	34.8426	1.81974	experimental
1832	xbz_28567	UAGUUAUCAGACUGAUGUUUAA	60	3	165.528	7.6555	35.0556	2.50545	experimental
1833	xbz_8337	GUGAGGUAGUAGGUUGUAUAGU	60	4	19518.3	329.086	30891.4	521.877	experimental
1834	he_33594	UAGCAGCACAUAAUGGUUUGU	60	5	1197.39	80.3431	607.167	52.0358	experimental
1835	he_28479	UGUUAGUGAUGAUUUUAAAAUUAAAG	60	6	164.88	7.99149	78.5093	10.4412	experimental
1836	he_47551	GCCGAGAUAGCUCAGUUGGGAGAGCGUUAG	60	7	14458.9	234.226	20852.8	248.048	experimental
1837	he_17441	CUGAAAUGAAGAGAAUACUCAUUGCUGAUC	60	8	233.509	11.0711	4468.88	126.603	experimental
1838	he_24741	AAAGGAAUUUUGAAGAGAGAGUU	60	9	163.602	11.1539	42.5185	3.22804	experimental
1839	xbz_14109	ACAACAUUCAAAAAAGAGUAAUA	60	10	147.519	10.3945	34.5278	2.0161	experimental
1840	Ctr05-2M05		60	11	145.602	7.13022	32.8889	3.09456	control	control_spike-calibration	LC Internal Use
1841	xbz_11341	AUAGGUAUUAAGGUUUU	60	12	148.204	7.16659	34.8519	2.20795	experimental
1842	xbz_28567	UAGUUAUCAGACUGAUGUUUAA	60	13	150.204	9.87374	34.3519	1.47449	experimental
1843	xbz_8337	GUGAGGUAGUAGGUUGUAUAGU	60	14	18608.4	252.173	28333.3	364.207	experimental
1844	he_33594	UAGCAGCACAUAAUGGUUUGU	60	15	1082.02	21.7393	628.769	53.7425	experimental
1845	he_28479	UGUUAGUGAUGAUUUUAAAAUUAAAG	60	16	148.25	8.16892	72.2037	7.45674	experimental
1846	he_47551	GCCGAGAUAGCUCAGUUGGGAGAGCGUUAG	60	17	13428.8	232.917	21149.1	307.011	experimental
1847	he_17441	CUGAAAUGAAGAGAAUACUCAUUGCUGAUC	60	18	205.185	14.4372	4641.39	159.211	experimental
1848	he_24741	AAAGGAAUUUUGAAGAGAGAGUU	60	19	143.167	6.30902	42.5185	2.87263	experimental
1849	xbz_14109	ACAACAUUCAAAAAAGAGUAAUA	60	20	148.333	7.64028	36.8796	2.74362	experimental
1850	Ctr05-2M05		60	21	143.361	6.35766	35.1019	2.29155	control	control_spike-calibration	LC Internal Use
1851	xbz_11341	AUAGGUAUUAAGGUUUU	60	22	141.102	7.15116	33.0185	2.04154	experimental
1852	xbz_28567	UAGUUAUCAGACUGAUGUUUAA	60	23	149.176	6.27535	35.3889	3.05964	experimental
1853	xbz_8337	GUGAGGUAGUAGGUUGUAUAGU	60	24	17170.6	257.251	25820.8	352.541	experimental
1854	he_33594	UAGCAGCACAUAAUGGUUUGU	60	25	1092.97	83.3922	603.12	63.5861	experimental
1855	he_28479	UGUUAGUGAUGAUUUUAAAAUUAAAG	60	26	145.722	5.93396	79.3426	14.4547	experimental
1856	he_47551	GCCGAGAUAGCUCAGUUGGGAGAGCGUUAG	60	27	12511.1	175.504	19232.4	427.557	experimental
1857	he_17441	CUGAAAUGAAGAGAAUACUCAUUGCUGAUC	60	28	206.231	16.691	4380.54	122.633	experimental
1858	he_24741	AAAGGAAUUUUGAAGAGAGAGUU	60	29	142.509	8.49353	41.3426	5.76675	experimental
1859	xbz_14109	ACAACAUUCAAAAAAGAGUAAUA	60	30	134.222	8.7278	31.2222	2.34155	experimental
1860	Ctr05-2M05		60	31	140.759	11.368	32.2407	2.86085	control	control_spike-calibration	LC Internal Use
1861	Ctr05-2M10		61	1	188.278	9.90311	96.9722	13.5374	control	control_spike-calibration	LC Internal Use
1862	xbz_5348	UGAGGGGCAGAGAGCGAGACUUU	61	2	3713.25	93.1357	3603.12	169.922	experimental
1863	xbz_19721	AACCAGGCGGAAACACCAAA	61	3	823.444	64.6275	106.009	15.0975	experimental
1864	xbz_7517	UUCAAGUAAUUCAGGAUAGGUU	61	4	3012.94	102.001	2202.14	110.068	experimental
1865	he_53033	ACCUGGCAUACAAUGUAGAUUUCU	61	5	214.009	14.6156	45.25	4.38375	experimental
1866	he_28480	UGAGCAUGUAGACAAAGGUAACACUGAAG	61	6	319.713	19.8532	12170.3	185.452	experimental
1867	he_47552	GGGGGUAUAGCUCAGCGGUAGAGCGCG	61	7	21918.8	275.262	18304.6	257.805	experimental
1868	he_18129	UUAGUUUUACCCUACUGAUGAUCUGUUG	61	8	189.398	8.38439	81.0648	11.1609	experimental
1869	he_23198	UAGCACAUGAAAUCAGUUAA	61	9	159.472	9.86683	35.2315	2.467	experimental
1870	xbz_14070	CAGAACCCAACCUCCGAGCAGUA	61	10	382.769	42.147	188.63	20.4009	experimental
1871	Ctr05-2M10		61	11	181.287	10.7252	78.2685	11.7423	control	control_spike-calibration	LC Internal Use
1872	xbz_5348	UGAGGGGCAGAGAGCGAGACUUU	61	12	3417.3	125.665	3073.45	149.969	experimental
1873	xbz_19721	AACCAGGCGGAAACACCAAA	61	13	711.065	48.7746	94.0093	14.6833	experimental
1874	xbz_7517	UUCAAGUAAUUCAGGAUAGGUU	61	14	2912.99	92.2884	2102.51	95.4845	experimental
1875	he_53033	ACCUGGCAUACAAUGUAGAUUUCU	61	15	188.546	16.156	39.4074	4.24052	experimental
1876	he_28480	UGAGCAUGUAGACAAAGGUAACACUGAAG	61	16	307.611	25.1027	11993.4	258.52	experimental
1877	he_47552	GGGGGUAUAGCUCAGCGGUAGAGCGCG	61	17	20475.8	266.307	18557.7	368.339	experimental
1878	he_18129	UUAGUUUUACCCUACUGAUGAUCUGUUG	61	18	162.065	9.97312	89.6944	6.94364	experimental
1879	he_23198	UAGCACAUGAAAUCAGUUAA	61	19	139.139	9.72564	34.7407	2.59176	experimental
1880	xbz_14070	CAGAACCCAACCUCCGAGCAGUA	61	20	348.426	18.9407	221.972	16.9681	experimental
1881	Ctr05-2M10		61	21	185.407	16.385	101.176	12.2244	control	control_spike-calibration	LC Internal Use
1882	xbz_5348	UGAGGGGCAGAGAGCGAGACUUU	61	22	3218.76	82.9039	3422.45	120.283	experimental
1883	xbz_19721	AACCAGGCGGAAACACCAAA	61	23	751.537	43.4417	115.954	14.3516	experimental
1884	xbz_7517	UUCAAGUAAUUCAGGAUAGGUU	61	24	2862.45	95.8761	2195.52	104.019	experimental
1885	he_53033	ACCUGGCAUACAAUGUAGAUUUCU	61	25	189.491	15.7382	43.0926	2.50807	experimental
1886	he_28480	UGAGCAUGUAGACAAAGGUAACACUGAAG	61	26	302.694	20.3426	10763.2	159.256	experimental
1887	he_47552	GGGGGUAUAGCUCAGCGGUAGAGCGCG	61	27	17669.2	1686.46	16457.9	275.681	experimental
1888	he_18129	UUAGUUUUACCCUACUGAUGAUCUGUUG	61	28	174.093	10.4251	110.426	10.9435	experimental
1889	he_23198	UAGCACAUGAAAUCAGUUAA	61	29	143.741	8.46253	32.7037	1.71447	experimental
1890	xbz_14070	CAGAACCCAACCUCCGAGCAGUA	61	30	348.037	22.4187	202.278	18.5426	experimental
1891	Ctr05-2M10		61	31	178.676	11.2456	98.0648	18.6819	control	control_spike-calibration	LC Internal Use
1892	Ctr06-2P		62	1	304.065	20.6743	76.3704	12.3323	control	control_spike-calibration	LC Internal Use
1893	xbz_2650	GAGGGGGCGGGCUCCGGCG	62	2	14884.8	192.904	33170.7	528.638	experimental
1894	xbz_22723	AGUUGGGAGAGCAUCG	62	3	6004.99	160.072	10302.3	252.039	experimental
1895	xbz_6475	UGAGGUAGGAGGUUGUAUAGUU	62	4	10554.6	231.451	13895.4	383.843	experimental
1896	he_17478	CACUAGAUUGUGAGCUCCUGGA	62	5	427.259	26.1664	126.046	14.4568	experimental
1897	he_28482	CCUGGAUGAUGAUAAGCAAAUGCUGACU	62	6	325.435	15.4074	20949.1	209.606	experimental
1898	he_47554	GGGGGUAUAGCUCAGUGGUAGAGAGUG	62	7	19270	176.033	20603.4	209.53	experimental
1899	he_18225	UCCCUGGUGGUCUAGUGGUUAGGAUUCAGU	62	8	41342.2	452.405	30658.2	327.089	experimental
1900	he_5721	GUGAAUGAUGAGUAUUGACA	62	9	154.639	9.51188	37.8796	2.82088	experimental
1901	xbz_14050	CACCACGAUCAAAAGGGACA	62	10	339.778	24.2712	117.509	18.1631	experimental
1902	Ctr06-2P		62	11	285.963	22.7284	65.6759	8.92108	control	control_spike-calibration	LC Internal Use
1903	xbz_2650	GAGGGGGCGGGCUCCGGCG	62	12	13998.4	143.816	30184.2	352.491	experimental
1904	xbz_22723	AGUUGGGAGAGCAUCG	62	13	5013.76	168.25	9091.08	153.806	experimental
1905	xbz_6475	UGAGGUAGGAGGUUGUAUAGUU	62	14	10245.1	192.481	13729.1	297.338	experimental
1906	he_17478	CACUAGAUUGUGAGCUCCUGGA	62	15	359.907	26.9314	103.796	11.0587	experimental
1907	he_28482	CCUGGAUGAUGAUAAGCAAAUGCUGACU	62	16	286.843	21.6692	19927.4	359.896	experimental
1908	he_47554	GGGGGUAUAGCUCAGUGGUAGAGAGUG	62	17	18330.9	176.306	21374	356.596	experimental
1909	he_18225	UCCCUGGUGGUCUAGUGGUUAGGAUUCAGU	62	18	38126.3	312.234	30327.8	320.635	experimental
1910	he_5721	GUGAAUGAUGAGUAUUGACA	62	19	138.907	8.33811	36.1389	2.06646	experimental
1911	xbz_14050	CACCACGAUCAAAAGGGACA	62	20	341.639	20.6209	129.944	11.8265	experimental
1912	Ctr06-2P		62	21	270.463	17.4503	87.787	13.4929	control	control_spike-calibration	LC Internal Use
1913	xbz_2650	GAGGGGGCGGGCUCCGGCG	62	22	13243.9	154.812	29183.8	432.028	experimental
1914	xbz_22723	AGUUGGGAGAGCAUCG	62	23	4830.55	104.294	9043.31	287.914	experimental
1915	xbz_6475	UGAGGUAGGAGGUUGUAUAGUU	62	24	9673.79	320.249	13332.2	397.973	experimental
1916	he_17478	CACUAGAUUGUGAGCUCCUGGA	62	25	390.343	21.9004	112.935	7.41465	experimental
1917	he_28482	CCUGGAUGAUGAUAAGCAAAUGCUGACU	62	26	288.565	14.172	18105.9	185.583	experimental
1918	he_47554	GGGGGUAUAGCUCAGUGGUAGAGAGUG	62	27	16736.4	642.926	19275	314.586	experimental
1919	he_18225	UCCCUGGUGGUCUAGUGGUUAGGAUUCAGU	62	28	36063.6	274.425	29135	322.319	experimental
1920	he_5721	GUGAAUGAUGAGUAUUGACA	62	29	137.231	7.81516	34.5185	1.69376	experimental
1921	xbz_14050	CACCACGAUCAAAAGGGACA	62	30	299.361	12.6812	127.63	24.2728	experimental
1922	Ctr06-2P		62	31	265.324	20.006	72.75	10.1963	control	control_spike-calibration	LC Internal Use
1923	Ctr06-2M05		63	1	157.935	9.80203	33.7593	2.56821	control	control_spike-calibration	LC Internal Use
1924	xbz_12	UAAUACUGCCUGGUAAUGAUGAC	63	2	178.352	12.5923	41.5463	5.88898	experimental
1925	xbz_29277	CUUAGCAGGUUGUAUUAUCA	63	3	161.102	8.17557	35.6204	2.6359	experimental
1926	xbz_19	GAGGCUGAAGAGGACGC	63	4	37400.2	589.854	19989.9	386.445	experimental
1927	he_22761	GAGCUUAUUCAUAAAAGUGCAG	63	5	164.343	10.2621	37.2037	2.64313	experimental
1928	he_28483	AAUCAUGAAGAGAUGUACUAUCUGUCUGA	63	6	172.306	10.2851	403.963	33.8625	experimental
1929	he_47558	GGGGGGUGUAGCUCAGUGGUAGAGCGCG	63	7	25518.1	208.199	25638	320.376	experimental
1930	he_18278	CCUUGGUGGUCUAGUGGUUAGGAUUCGG	63	8	48215.3	370.48	30058.1	549.803	experimental
1931	he_7061	UAAGAGGAUUAGAUACCCUGGU	63	9	164.833	7.39853	39	3.39323	experimental
1932	xbz_14154	UCAUGGGGAAGCAGAUUUG	63	10	606.074	40.4081	810.944	51.6295	experimental
1933	Ctr06-2M05		63	11	150.407	7.44956	32.6296	1.8924	control	control_spike-calibration	LC Internal Use
1934	xbz_12	UAAUACUGCCUGGUAAUGAUGAC	63	12	171.944	10.6647	41.4444	5.92055	experimental
1935	xbz_29277	CUUAGCAGGUUGUAUUAUCA	63	13	144.296	7.86125	34.6574	2.14938	experimental
1936	xbz_19	GAGGCUGAAGAGGACGC	63	14	35150.7	335.532	18877.2	401.392	experimental
1937	he_22761	GAGCUUAUUCAUAAAAGUGCAG	63	15	141.5	6.63677	34.5278	1.95968	experimental
1938	he_28483	AAUCAUGAAGAGAUGUACUAUCUGUCUGA	63	16	152.509	11.6414	390.75	44.7377	experimental
1939	he_47558	GGGGGGUGUAGCUCAGUGGUAGAGCGCG	63	17	24103.2	270.02	26033.8	329.943	experimental
1940	he_18278	CCUUGGUGGUCUAGUGGUUAGGAUUCGG	63	18	44298.8	438.532	29730.9	440.144	experimental
1941	he_7061	UAAGAGGAUUAGAUACCCUGGU	63	19	147.991	9.49126	37.1759	2.44119	experimental
1942	xbz_14154	UCAUGGGGAAGCAGAUUUG	63	20	620.009	46.6148	931.861	72.2558	experimental
1943	Ctr06-2M05		63	21	145.056	7.07613	35.1019	2.32395	control	control_spike-calibration	LC Internal Use
1944	xbz_12	UAAUACUGCCUGGUAAUGAUGAC	63	22	163.843	9.93358	43.6296	3.29143	experimental
1945	xbz_29277	CUUAGCAGGUUGUAUUAUCA	63	23	144.648	6.3442	35.1019	2.3559	experimental
1946	xbz_19	GAGGCUGAAGAGGACGC	63	24	32152.1	370.957	16994.8	270.43	experimental
1947	he_22761	GAGCUUAUUCAUAAAAGUGCAG	63	25	145.611	5.70101	37.6481	2.08831	experimental
1948	he_28483	AAUCAUGAAGAGAUGUACUAUCUGUCUGA	63	26	151.639	8.81636	373.306	26.8183	experimental
1949	he_47558	GGGGGGUGUAGCUCAGUGGUAGAGCGCG	63	27	21983.6	929.853	23636.9	251.472	experimental
1950	he_18278	CCUUGGUGGUCUAGUGGUUAGGAUUCGG	63	28	41561.3	302.257	29268	314.46	experimental
1951	he_7061	UAAGAGGAUUAGAUACCCUGGU	63	29	139.546	4.84601	38.9352	2.42369	experimental
1952	xbz_14154	UCAUGGGGAAGCAGAUUUG	63	30	602.333	47.3951	964.917	42.2344	experimental
1953	Ctr06-2M05		63	31	131.407	8.50293	33.5185	1.84179	control	control_spike-calibration	LC Internal Use
1954	Ctr06-2M10		64	1	157.25	5.95171	33.5185	2.64215	control	control_spike-calibration	LC Internal Use
1955	xbz_14635	UCAGAGUUGACGAUC	64	2	153.528	7.25949	32.7407	1.68762	experimental
1956	xbz_27389	UGAAUUACCGAAGGGCCAU	64	3	179.417	7.31165	42.9167	4.76774	experimental
1957	xbz_3732	ACUGCAGUGAAGGCACUUGUAG	64	4	181.148	5.44439	42.213	4.39849	experimental
1958	he_6832	ACUGCAGUGAAGGCACUUGUAG	64	5	174.13	10.5822	44.1204	2.8734	experimental
1959	he_28713	AACAUUCAACGCUGUCGGUGAGUUUGGA	64	6	656.231	40.5213	325.176	31.3195	experimental
1960	he_47874	GUGCAGUGGUAUAGUGGUGAGCAUAGCU	64	7	31452.4	426.075	35009.6	527.253	experimental
1961	he_18955	GAAAAUGAUGAAUUCUGGGGCGCUGAUU	64	8	228.167	14.041	85.3981	13.4407	experimental
1962	he_1916	UAGUACUGUGCAUAUCAUCUAU	64	9	158.546	6.41753	34.213	1.75111	experimental
1963	TU105	AAAUUGGCUGACUCUAACCAUUGUCAAGCUUA	64	10	149.852	11.0874	30.7315	1.85254	experimental
1964	Ctr06-2M10		64	11	145.583	7.69042	32.5	2.47038	control	control_spike-calibration	LC Internal Use
1965	xbz_14635	UCAGAGUUGACGAUC	64	12	145.231	8.30562	33.3611	3.11	experimental
1966	xbz_27389	UGAAUUACCGAAGGGCCAU	64	13	162.139	10.3087	37.713	4.70643	experimental
1967	xbz_3732	ACUGCAGUGAAGGCACUUGUAG	64	14	159.472	13.7307	40.25	4.49533	experimental
1968	he_6832	ACUGCAGUGAAGGCACUUGUAG	64	15	155.111	9.09897	37.5463	3.36942	experimental
1969	he_28713	AACAUUCAACGCUGUCGGUGAGUUUGGA	64	16	548.139	24.3155	306.046	18.6885	experimental
1970	he_47874	GUGCAGUGGUAUAGUGGUGAGCAUAGCU	64	17	29100.8	363.702	34470.1	474.102	experimental
1971	he_18955	GAAAAUGAUGAAUUCUGGGGCGCUGAUU	64	18	191.833	12.273	74.3426	6.33955	experimental
1972	he_1916	UAGUACUGUGCAUAUCAUCUAU	64	19	140.954	10.45	32.8889	2.59883	experimental
1973	TU105	AAAUUGGCUGACUCUAACCAUUGUCAAGCUUA	64	20	142.565	11.1223	35	1.88947	experimental
1974	Ctr06-2M10		64	21	142.204	8.64001	34.6852	2.47472	control	control_spike-calibration	LC Internal Use
1975	xbz_14635	UCAGAGUUGACGAUC	64	22	134.472	5.72331	33.9167	2.4803	experimental
1976	xbz_27389	UGAAUUACCGAAGGGCCAU	64	23	163.028	9.15133	39.6111	2.62566	experimental
1977	xbz_3732	ACUGCAGUGAAGGCACUUGUAG	64	24	156.861	8.4394	43.8611	3.56635	experimental
1978	he_6832	ACUGCAGUGAAGGCACUUGUAG	64	25	156.722	8.29574	41.1667	2.84982	experimental
1979	he_28713	AACAUUCAACGCUGUCGGUGAGUUUGGA	64	26	588.13	35.3138	297.917	41.6057	experimental
1980	he_47874	GUGCAGUGGUAUAGUGGUGAGCAUAGCU	64	27	27102.6	315.226	31407.3	224.267	experimental
1981	he_18955	GAAAAUGAUGAAUUCUGGGGCGCUGAUU	64	28	209.157	17.3211	91.1296	9.74449	experimental
1982	he_1916	UAGUACUGUGCAUAUCAUCUAU	64	29	141.093	6.45985	33.2593	2.59536	experimental
1983	TU105	AAAUUGGCUGACUCUAACCAUUGUCAAGCUUA	64	30	140.972	11.905	31.0185	1.99055	experimental
1984	Ctr06-2M10		64	31	131.361	7.66526	30.6204	2.6038	control	control_spike-calibration	LC Internal Use
1985	Ctr07-2P		65	1	17301	202.301	14506.6	287.673	control	control_spike-calibration	LC Internal Use
1986	xbz_9862	UACUUGUUUUAGGAGUAUCUU	65	2	165.463	10.0051	32.75	1.49844	experimental
1987	xbz_28720	CAAUUUAGUGUGUGUGAUAUU	65	3	164.833	9.78412	36.6944	3.39174	experimental
1988	xbz_251	CUUUCAGUCGGAUGUUUACAGC	65	4	339.731	18.5818	79	10.1429	experimental
1989	he_1493	UAUUGCACUCGUCCCGGCCUCC	65	5	5431.61	153.009	4037.07	149.775	experimental
1990	he_28866	GCGUUGGUGGUAUAGUGGUGAGGAUAGCU	65	6	33282.3	236.331	38151.8	515.5	experimental
1991	he_48827	UCCCUGUGAUGAAGUCACCCUGAGGGGC	65	7	167.398	9.96061	45.4167	3.97216	experimental
1992	he_19075	ACCCUGUAGUCUAGUGGUUAUGAUUUGG	65	8	204.472	13.3916	45.1852	4.14266	experimental
1993	he_3446	UGAGACACGUUGCGUAUUGA	65	9	164.944	10.6357	35.6389	2.96855	experimental
1994	TU107	AGAAGGUGCUUCUCCUAGGGCCCGAGUCUAGG	65	10	161.556	9.71975	35.6111	3.79087	experimental
1995	Ctr07-2P		65	11	16099.1	326.367	12482.7	264.575	control	control_spike-calibration	LC Internal Use
1996	xbz_9862	UACUUGUUUUAGGAGUAUCUU	65	12	151.87	9.72817	33.9074	1.35023	experimental
1997	xbz_28720	CAAUUUAGUGUGUGUGAUAUU	65	13	153.139	7.89352	35.0185	2.73428	experimental
1998	xbz_251	CUUUCAGUCGGAUGUUUACAGC	65	14	319.87	16.1425	78.9074	12.6199	experimental
[truncated: 1,971 more rows]

## Sheet: 处理后数据
		Sample A		Sample B					Diagnol Lines
索引	探针_ID	信号值	标准偏差	信号值	标准偏差	p值	log2 (SampeB / SampleA)	说明	P1	P2
1170	he_1011	716.04	38.7023	2019.15	58.2667	0	1.49563		1	1
1160	he_1011	634.234	35.8514	1871.52	70.7052	0	1.56112		100000	100000
1150	he_1011	647.273	43.142	1734.88	72.9419	0	1.42239		1	1.5
3158	he_1012	3128.57	68.4179	1232.41	65.1521	0	-1.34402		100000	150000
3148	he_1012	3515.55	118.826	1397.66	72.9653	0	-1.33074		1.5	1
3138	he_1012	3979.73	149.12	1489.27	81.4243	0	-1.41807		150000	100000
960	he_10229	2678.26	76.5239	966.685	72.2684	0	-1.47018
940	he_10229	2399.59	90.5839	768.794	66.5653	0	-1.64212
950	he_10229	2535.35	122.677	808.503	56.1671	0	-1.64886
2939	he_10363	24222.4	244.904	21235.7	248.445	1.11022e-16	-0.18985
2919	he_10363	31095.4	215.055	26880	524.29	5.23803e-13	-0.210165
2929	he_10363	27022.1	335.16	24908.4	312.506	1.05302e-05	-0.117504
1010	he_10527	13867.8	179.648	5470.74	161.385	0	-1.34193
1000	he_10527	14127.3	200.782	5633.72	168.208	0	-1.32633
1020	he_10527	13317.2	172.829	5565.31	179.075	0	-1.25876
1041	he_10552	13.7992	8.40014	600.572	43.0445	0	5.44368
1051	he_10552	11.7591	5.05048	682.048	54.974	0	5.85802
1031	he_10552	30.4248	8.20266	520.12	46.2291	0	4.09552
1610	he_11181	3221.77	72.7485	10765	116.205	0	1.74042
1590	he_11181	3285.6	92.4716	9422.95	128.564	0	1.52002
1600	he_11181	3327.24	79.6546	10415.1	256.47	0	1.64628
1082	he_11413	14.5673	5.0132	267.527	33.6709	1.39926e-11	4.19888
1072	he_11413	22.9114	7.38023	243.652	29.0164	3.91924e-11	3.41069
1062	he_11413	39.6755	6.20759	243.793	38.3914	1.02066e-06	2.61934
1113	he_11415	17.3999	4.88393	331.038	24.1608	0	4.24985
1093	he_11415	33.9792	5.27491	312.025	32.0938	1.25455e-14	3.19894
1103	he_11415	12.0314	7.20394	273.217	36.3216	9.14063e-11	4.50517
3322	he_11555	478.312	31.6737	293.879	29.5171	0.000207046	-0.702727
1206	he_11793	3404.23	65.962	11654.6	173.884	0	1.7755
1186	he_11793	3676.25	92.6732	11643.3	197.698	0	1.6632
1196	he_11793	3540.86	123.936	11450.8	227.407	0	1.69327
140	he_12202	1452.82	84.7879	451.1	41.8998	0	-1.68733
150	he_12202	1407.7	106.005	465.144	26.0128	3.33067e-16	-1.59759
130	he_12202	1395.41	133.511	423.446	51.1407	1.22879e-10	-1.72044
595	he_12204	11148.8	127.546	15997.2	312.239	0	0.520932
615	he_12204	11398.6	178.705	17634.4	423.509	0	0.629534
605	he_12204	11333.1	241.144	15650.8	393.171	0	0.465688
1268	he_12588	10.1503	4.64438	55.7569	11.2354	0.00337016	2.45763
2807	he_129	17.3265	6.92007	114.134	14.8256	1.26544e-06	2.71967
2817	he_129	26.2343	7.56553	115.265	19.6016	0.000234532	2.13543
3415	he_13388	1299.61	61.9857	586.683	33.4368	0	-1.14742
3435	he_13388	1044.99	54.7293	502.264	47.3298	4.67715e-12	-1.05697
3425	he_13388	1087.42	82.5448	524.482	44.5327	2.48112e-08	-1.05195
1330	he_13555	15485.7	196.805	19135.2	273.952	0	0.305292
1310	he_13555	16345.8	178.243	18739.9	230.728	1.11022e-16	0.197196
1320	he_13555	16332.7	210.4	19009.6	338.846	1.02547e-11	0.21896
1341	he_13758	23473	141.902	21491.2	194.686	2.44249e-15	-0.127256
1392	he_13856	9183.41	95.6557	2343.7	77.8047	0	-1.97024
1372	he_13856	9892.3	110.629	2200.06	96.3174	0	-2.16876
1382	he_13856	9294.29	135.669	2301.37	48.0869	0	-2.01385
1403	he_13939	628.505	40.2779	275.482	20.9352	3.97138e-12	-1.18997
1413	he_13939	596.925	51.8648	297.664	32.0483	9.84407e-06	-1.00386
1423	he_13939	595.12	45.6319	338.171	24.4359	9.93946e-06	-0.815429
1434	he_14017	47653.5	232.03	31006.5	478.25	0	-0.620014
1454	he_14017	43649.9	223.913	30462.1	376.124	0	-0.51896
1444	he_14017	45185.1	1783.09	29987.9	1875.23	1.19967e-08	-0.591463
2609	he_14115	2772.88	80.1472	2219.11	118.668	0.000329952	-0.321402
1516	he_14386	80.8423	16.6291	5745.96	116.772	0	6.15129
1506	he_14386	56.0831	12.3764	6088.6	132.954	0	6.7624
1496	he_14386	93.2758	12.3083	5777.79	171.472	0	5.95287
1547	he_14393	20.3802	6.69895	983.777	33.9281	0	5.59309
1527	he_14393	42.3485	6.53707	955.075	59.2768	0	4.49523
1537	he_14393	22.7631	7.10341	1051.98	97.2057	0	5.53027
695	he_14423	1356.67	58.9533	756.188	38.7846	3.9968e-15	-0.843253
705	he_14423	1285.51	64.2634	692.978	58.7327	2.59621e-10	-0.891458
685	he_14423	1285.58	67.3541	744.867	53.0104	5.14169e-09	-0.78736
3466	he_1492	1228.57	50.7562	16690.4	253.21	0	3.76396
3456	he_1492	1296.12	58.7465	18413.1	316.958	0	3.82846
3446	he_1492	1385.22	57.6059	17253.3	416.577	0	3.63869
2009	he_1493	4679.5	132.308	3645.96	123.466	6.13689e-08	-0.360059
1999	he_1493	4846.55	128.095	3857.92	140.729	8.80639e-07	-0.329137
1989	he_1493	5167.24	149.162	4107.89	153.638	2.78669e-06	-0.330996
2547	he_15140	2652.84	78.2941	928.456	40.664	0	-1.51463
2567	he_15140	2209.49	99.7361	837.508	51.0938	0	-1.39954
2557	he_15140	2361.3	123.166	855.947	65.595	0	-1.46398
2247	he_15142	15264	121.476	25877.5	236.379	0	0.761567
2237	he_15142	16879.6	319.606	27724.5	366.917	0	0.715886
2257	he_15142	14228.5	198.279	23372.4	412.967	0	0.716022
3508	he_15370	751.964	35.7599	375.387	51.9526	5.79858e-08	-1.00229
3528	he_15370	576.576	35.4818	321.265	23.7935	1.40647e-07	-0.843747
3518	he_15370	588.376	33.9951	372.234	27.7895	1.57043e-05	-0.660528
2795	he_15397	146.054	18.3612	40.9926	10.7094	7.9823e-05	-1.83307
822	he_15398	252.747	23.4042	131.634	15.9995	0.000393942	-0.941162
812	he_15398	278.144	31.8419	140.731	23.2433	0.00289914	-0.982892
832	he_15398	260.974	21.4713	149.18	23.0331	0.00308787	-0.806846
1105	he_15588	5218.64	54.6592	686.22	55.0606	0	-2.92693
1095	he_15588	5322.87	159.852	694.53	48.5001	0	-2.93809
1115	he_15588	4935.63	158.956	751.393	72.3624	0	-2.71559
1609	he_15624	744.809	35.7472	902.717	40.9009	0.00428543	0.277402
3146	he_15651	16892.5	290.122	30083.2	266.673	0	0.832573
3156	he_15651	15129.2	148.991	25442.1	307.824	0	0.749885
3136	he_15651	19309.1	164.401	31500.5	495.245	0	0.706092
2826	he_15653	15794.1	247.2	27337.4	354.719	0	0.791496
2836	he_15653	13817.7	192.278	25256.7	385.785	0	0.870152
2846	he_15653	12579.5	135.198	21563.5	394.531	0	0.777523
1640	he_15724	37139.1	189.693	44439.1	335.544	0	0.258891
1630	he_15724	38816.2	214.585	43993.8	528.271	0	0.180642
1620	he_15724	41475.8	251.31	45629.6	622.907	2.82791e-10	0.137699
857	he_1586	6592.96	138.429	2772.99	72.098	0	-1.24948
847	he_1586	6850.64	113.058	3288.24	124.543	0	-1.05892
867	he_1586	6533.73	129.81	2917.99	125.285	0	-1.16293
1661	he_16347	7.45269	5.46595	54.7117	9.44786	0.00109046	2.87602
1671	he_16347	6.00986	2.93656	70.0299	17.0742	0.00179871	3.54257
1702	he_16349	29.5207	7.31776	2224.1	45.3169	0	6.23535
1692	he_16349	36.9326	4.46812	2256.22	99.8994	0	5.93287
1682	he_16349	56.8183	10.04	2109.64	125.779	0	5.2145
1744	he_16726	17744.4	228.228	14306.9	203.917	0	-0.310651
1764	he_16726	15929.8	266.591	14660	198.547	0.000309027	-0.11984
1201	he_16755	2104.15	67.0946	625.241	39.2043	0	-1.75075
1181	he_16755	1782.16	69.5997	495.906	44.9338	0	-1.84549
1191	he_16755	1887.6	93.3595	534.703	46.221	0	-1.81975
3683	he_17153	7760.97	152.376	8998.3	117.678	1.12392e-10	0.213416
3673	he_17153	8619.89	135.464	9166.28	175.765	0.0099189	0.0886671
1683	he_17291	3296.09	68.7286	401.009	33.5712	0	-3.03905
1693	he_17291	3128.74	57.3937	460.818	47.046	0	-2.76331
1703	he_17291	3130.58	92.669	510.064	26.1463	0	-2.61768
1795	he_17407	35.528	10.5971	1742.89	72.8192	0	5.61638
1785	he_17407	38.7289	13.8513	1679.99	74.3594	0	5.4389
1775	he_17407	51.5394	11.7246	1499.18	124.85	0	4.86235
1857	he_17441	70.5728	16.4978	4398.99	124.07	0	5.96192
1837	he_17441	99.75	10.7838	4554.65	129.976	0	5.51288
1847	he_17441	75.911	14.1278	4709.89	162.697	0	5.95524
3611	he_17477	1437.86	84.5341	722.184	55.3256	3.35285e-11	-0.993485
3621	he_17477	1312.45	60.2418	761.042	47.9041	3.58293e-11	-0.786214
3601	he_17477	1645.42	109.49	752.623	65.8648	4.23699e-11	-1.12845
1916	he_17478	235.212	20.199	87.291	8.03923	3.51756e-08	-1.43006
1896	he_17478	277.862	24.5499	99.7403	15.4087	2.15608e-07	-1.47812
1906	he_17478	205.555	24.377	79.3162	12.2175	0.000126305	-1.37384
181	he_17857	591.346	41.7908	415.85	21.7734	0.00116092	-0.50794
171	he_17857	552.074	52.7808	353.397	33.0789	0.00481047	-0.643574
1888	he_18129	29.4055	7.77594	104.512	14.6719	0.000174542	1.82951
1878	he_18129	24.8277	7.16922	79.6663	9.65931	0.000434288	1.68202
1899	he_18225	40734.7	447.175	30984	330.915	0	-0.394735
1909	he_18225	37534.6	308.42	30670.1	324.601	0	-0.291389
1919	he_18225	35465.5	270.884	29483	326.532	0	-0.266535
1950	he_18278	40935.9	298.674	29586.3	318.232	0	-0.468436
1930	he_18278	47574.5	366.553	30347.4	555.693	0	-0.648618
1940	he_18278	43673	433.583	30037.4	445.167	0	-0.539978
2206	he_19454	2215.33	63.5772	12318	213.385	0	2.47517
2226	he_19454	1892.27	84.1767	10749.1	185.005	0	2.50603
2216	he_19454	2025.46	72.1859	11362.3	281.593	0	2.48793
2043	he_19455	727.373	35.5339	3662.27	71.9185	0	2.33197
2033	he_19455	779.529	49.9403	3852.72	95.2376	0	2.3052
2023	he_19455	822.101	41.8225	3596.07	103.807	0	2.12903
2848	he_197	598.165	50.3206	94.3087	12.1808	0	-2.66508
2828	he_197	430.766	42.4459	77.2663	16.5278	4.34508e-12	-2.47899
2838	he_197	449.097	59.4754	79.2685	18.0227	6.62494e-08	-2.50221
2054	he_19742	41790.6	347.139	30606.2	544.964	0	-0.449356
2064	he_19742	38135.6	401.015	30281.9	346.889	0	-0.332683
2074	he_19742	35679.5	307.452	28996.5	366.344	0	-0.299217
3169	he_1991	37972.8	184.061	30327.2	572.759	0	-0.324352
3179	he_1991	32459.1	273.126	27636.6	313.851	0	-0.232043
3189	he_1991	29847.7	289.775	26925.9	367.126	1.67536e-09	-0.148625
2085	he_20008	15435.7	191.702	13600.7	193.446	9.83064e-11	-0.182597
2157	he_20131	12.6855	3.60275	52.7183	11.4752	0.00898108	2.05512
2178	he_20151	35012.4	186.799	29178.7	646.343	0	-0.262948
2188	he_20151	31415.9	364.842	29423.9	345.806	0.000166212	-0.0945045
2198	he_20151	29518	277.579	28035.1	269.307	0.000285038	-0.0743608
2219	he_20180	1083.89	51.8323	184.782	31.1049	0	-2.55232
2229	he_20180	1061.03	58.1145	192.585	9.75248	0	-2.4619
2209	he_20180	1227.23	78.1743	213.311	21.7623	0	-2.52438
2240	he_20181	296.181	28.2053	85.6111	11.5383	3.88379e-09	-1.79061
2250	he_20181	222.476	16.5231	79.4732	18.5212	2.08962e-06	-1.48511
2260	he_20181	214.807	27.5753	83.0197	13.2718	0.000305461	-1.37151
561	he_20271	203.818	10.6997	670.785	31.5455	0	1.71857
571	he_20271	249.972	16.9192	740.142	42.1748	0	1.56603
581	he_20271	216.59	25.4419	718.073	56.0715	7.54952e-15	1.72917
795	he_2031	8530.95	145.057	1775.01	79.594	0	-2.26488
805	he_2031	8486.46	136.644	1933.67	89.0868	0	-2.13382
785	he_2031	8925.12	165.077	2102.07	62.1522	0	-2.08606
2040	he_20416	241.138	22.8917	1319.34	64.4221	0	2.45189
2020	he_20416	253.988	23.6849	1196.26	78.5458	0	2.2357
2030	he_20416	210.705	35.3458	1087.94	73.8139	0	2.36831
602	he_2066	344.739	22.8271	20.5189	5.3593	0	-4.07048
612	he_2066	497.48	39.6454	23.4521	9.02258	0	-4.40685
592	he_2066	192.783	20.4026	13.3282	6.59334	1.02082e-11	-3.85443
2302	he_20870	125.936	12.9868	30.6669	11.034	1.72963e-05	-2.03794
2322	he_20870	97.9354	14.2224	23.3274	4.89519	0.000223598	-2.0698
2312	he_20870	102.11	14.0816	27.3511	6.83982	0.000343751	-1.90045
2333	he_20896	6130.44	172.758	2395.31	93.9996	0	-1.35578
2353	he_20896	5055.26	116.586	2359.06	102.859	0	-1.09957
2343	he_20896	5245.02	147.033	2405.94	88.5835	0	-1.12434
2384	he_20915	3277.03	101.7	674.54	46.4303	0	-2.28041
2364	he_20915	3869.01	137.281	702.717	61.3519	0	-2.46095
2374	he_20915	3430.01	141.181	715.215	62.9348	0	-2.26176
2395	he_20919	14710.8	169.366	8804.22	176.213	0	-0.740607
2415	he_20919	12091.9	218.998	8599.81	154.713	0	-0.491664
2405	he_20919	12909.2	215.407	8903.42	255.482	0	-0.535971
2457	he_20936	3097.19	75.5127	1066.58	54.9647	0	-1.53797
2477	he_20936	2726.23	63.1858	1248.92	71.0253	0	-1.12623
2467	he_20936	2839.46	121.889	1226.09	98.865	0	-1.21156
971	he_20939	11128.4	113.589	5152.44	172.762	0	-1.11091
991	he_20939	10644.7	120.303	5357.46	142.744	0	-0.990513
981	he_20939	10809.3	184.184	5036.91	175.623	0	-1.10165
2539	he_20968	18799.2	222.118	22812.8	196.57	0	0.279173
2529	he_20968	19958.9	247.096	24232.1	319.455	0	0.279888
2519	he_20968	22970.1	219.091	24142.2	306.518	0.00119916	0.0717998
2102	he_21018	453.804	30.7202	2154.2	83.7342	0	2.24701
2082	he_21018	438.478	32.5255	1786.81	69.5558	0	2.02681
2092	he_21018	433.956	44.6639	1905.44	143.2	0	2.13451
2550	he_21059	27.754	6.79574	860.382	44.0731	0	4.95421
2570	he_21059	12.4308	5.12064	844.56	47.3601	0	6.08621
3191	he_21561	24703.8	153.85	57841.4	613.819	0	1.22737
3181	he_21561	27037.4	288.332	54125	564.274	0	1.00134
3171	he_21561	31481.3	243.922	63411.1	1030.96	0	1.01024
2581	he_21566	8524.1	160.227	1751.44	64.7507	0	-2.283
2591	he_21566	7199.89	140.942	1712.82	104.84	0	-2.0716
2601	he_21566	6859.76	176.209	1697.21	58.8444	0	-2.01499
3770	he_21594	197.966	25.1292	6980.13	94.2417	0	5.13993
3780	he_21594	165.274	8.02538	7593.47	204.05	0	5.52183
3760	he_21594	223.724	18.0359	7650.24	318.703	0	5.09571
2423	he_21649	8180.37	90.3796	12569.7	138.907	0	0.619714
2443	he_21649	6940.12	131.114	10945	214.474	0	0.657234
2433	he_21649	7381.55	142.418	11666.4	233.129	0	0.660366
3220	he_2174	4711.07	153.574	953.208	54.6402	0	-2.30519
3200	he_2174	4351.5	180.308	728.388	60.9118	0	-2.57874
3210	he_2174	4925.73	214.455	808.679	60.0997	0	-2.6067
3231	he_2186	8575.04	89.9245	3954.63	151.847	0	-1.1166
3251	he_2186	7168.38	130.564	3657.63	97.29	0	-0.970737
3241	he_2186	7591.44	162.527	3857.07	81.8624	0	-0.976869
2632	he_21871	2.19089	7.01897	650.038	48.0265	0	8.21287
2612	he_21871	19.4003	8.56825	499.197	53.0972	0	4.68546
2653	he_21872	9.04822	6.25201	372.659	35.118	0	5.36408
2663	he_21872	3.66636	6.25093	406.511	43.8668	0	6.7928
2643	he_21872	29.3251	6.95603	343.638	39.2675	3.45723e-13	3.55068
2684	he_21873	32.6428	13.4166	3950.13	121.199	0	6.91899
2694	he_21873	30.7833	15.3845	3724.71	188.323	0	6.91884
2674	he_21873	67.2625	12.1757	3984.5	226.13	0	5.88845
457	he_21878	285.372	21.8848	1166.23	41.5235	0	2.03094
447	he_21878	304.018	28.7886	1026.5	58.0543	0	1.7555
437	he_21878	305.843	39.0309	886.902	53.3143	0	1.53598
2715	he_21880	38.4947	15.5726	213.82	23.156	2.08748e-08	2.47367
2705	he_21880	83.5169	17.9089	223.811	21.7228	7.32077e-06	1.42214
2725	he_21880	42.8446	13.8857	217.088	43.4879	0.000261698	2.34109
2756	he_21967	6987.69	143.269	9514.54	172.144	0	0.445318
2746	he_21967	7546.72	160.211	9800.74	243.436	6.99441e-15	0.37704
2736	he_21967	8560.86	126.808	9656.41	228.376	1.79348e-05	0.17373
2808	he_22404	1.45025	5.5443	226.767	22.901	1.11022e-16	7.28876
2798	he_22404	20.126	7.11249	193.156	20.3653	7.53475e-12	3.26263
2818	he_22404	2.77344	4.78972	202.487	29.9302	3.01331e-09	6.19001
2880	he_22725	6125.96	129.784	21296.3	279.174	0	1.7976
2870	he_22725	6647.62	136.931	22379.3	310.558	0	1.75126
2860	he_22725	7736.51	163.395	23376.4	377.012	0	1.5953
2891	he_23346	405.189	40.7955	194.158	22.2171	6.51759e-05	-1.06136
2901	he_23346	332.278	42.462	169.49	24.6198	0.0039132	-0.971189
2911	he_23346	319.856	36.5165	178.304	22.7483	0.00470208	-0.843084
2942	he_23347	1439.68	72.3182	1792.17	33.8414	1.35075e-05	0.315962
2973	he_23413	4208.34	76.7747	642.832	39.8784	0	-2.71074
2963	he_23413	4472.77	105.23	640.723	63.469	0	-2.8034
2953	he_23413	5380.07	167.181	719.506	55.5331	0	-2.90255
3004	he_23428	14146.4	120.709	15118.5	145.068	2.00199e-07	0.0958788
2994	he_23428	15319.7	95.5976	16178.2	296.546	0.00395964	0.0786703
2505	he_23458	204.059	35.5575	362.339	47.5883	0.008113	0.828357
3282	he_2348	5442.85	85.8953	920.704	57.5648	0	-2.56355
3262	he_2348	6827.1	129.743	972.02	65.3795	0	-2.81221
3272	he_2348	6035.28	135.812	960.093	79.1813	0	-2.65217
3035	he_23737	1460.76	84.9024	333.386	28.8451	0	-2.13145
3015	he_23737	1301.67	95.1565	272.944	37.8134	0	-2.25369
3025	he_23737	1372.53	138.529	317.662	46.8524	7.74592e-12	-2.11128
3313	he_2388	3229.74	78.7397	4268.92	133.366	2.21196e-11	0.402456
3303	he_2388	3582.12	92.7313	4675.55	147.369	3.1472e-10	0.384322
3293	he_2388	3995.44	77.3539	4961.11	141.312	1.9581e-09	0.312307
3046	he_23954	65.4124	6.0077	23.7717	7.35596	0.0043587	-1.46032
3159	he_24403	1463.97	64.3618	519.921	41.0259	0	-1.49352
3149	he_24403	1597.78	79.5712	538.134	41.4538	0	-1.57003
3139	he_24403	1766.99	80.6704	601.365	59.1646	0	-1.55498
192	he_24677	111.229	14.1513	45.9732	11.668	0.00659493	-1.27466
743	he_24730	125.874	19.2867	545.48	32.7948	0	2.11555
723	he_24730	121.068	23.3251	416.264	31.2679	3.02103e-12	1.78168
733	he_24730	114.558	16.7367	445.012	44.5365	6.52279e-11	1.95776
3232	he_24979	1328.1	59.32	7160.69	123.966	0	2.43074
3242	he_24979	1086.59	50.882	6532.16	139.538	0	2.58775
3252	he_24979	992.867	35.71	6519.22	192.86	0	2.71503
26	he_24981	1598.98	187.015	4348.99	178.873	0	1.44353
16	he_24981	1668.64	193.823	4178.32	201.904	0	1.32425
6	he_24981	1508.97	189.068	3999.18	214.026	0	1.40614
584	he_25080	17439.9	208.977	28614.3	400.236	0	0.714344
574	he_25080	17579.6	246.927	26490	309.8	0	0.591549
564	he_25080	17929.3	182.676	28040	498.236	0	0.645165
2340	he_25081	13162.7	187.311	22171.6	363.263	0	0.752256
2350	he_25081	12304.6	175.376	20819.7	445.536	0	0.758749
2330	he_25081	14441.4	136.574	23217.4	600.749	0	0.684995
550	he_25083	15938.3	141.682	26786.9	453.166	0	0.749032
530	he_25083	16066.6	250.913	23320.1	217.805	0	0.537511
540	he_25083	16401.5	169.755	25198.7	522.11	0	0.61952
3701	he_25084	682.966	40.7546	190.651	22.6143	0	-1.84088
3691	he_25084	798.462	56.0847	191.113	22.6466	0	-2.0628
3711	he_25084	579.634	41.6218	172.213	15.735	2.22045e-16	-1.75095
2857	he_25098	86.1718	11.0215	20.3095	7.1114	0.000300846	-2.08506
3363	he_25099	15186	260.422	17716.4	133.321	0	0.222349
3373	he_25099	13685.9	171.938	15577	322.415	1.30342e-07	0.186724
3849	he_25100	49.7389	7.37055	11.3817	4.12866	0.00448967	-2.12766
78	he_25101	7460.05	217.224	3495.39	149.565	0	-1.09373
88	he_25101	7120.45	283.91	3646.32	102.28	0	-0.965528
68	he_25101	7310.17	433.445	3283.53	184.836	1.11022e-16	-1.15466
1253	he_25103	8235.35	81.8673	5681.96	162.882	0	-0.535441
1263	he_25103	7798.39	125.872	5471.98	121.366	0	-0.511113
1243	he_25103	8372.27	179.626	6271.72	196.959	3.17524e-14	-0.416757
3263	he_25375	16707.4	194.208	13207.1	208.7	0	-0.339173
3283	he_25375	13376.6	88.2665	12471.5	111.407	1.77559e-09	-0.101082
3273	he_25375	14560.7	223.967	12524.4	265.726	1.8617e-08	-0.217345
2117	he_25408	77.8968	10.3623	22.1651	11.5797	0.0082072	-1.81328
3325	he_25586	31.0471	8.31296	477.251	31.1868	0	3.94222
3345	he_25586	7.66572	6.08658	522.621	47.5639	0	6.0912
3335	he_25586	5.58251	8.97502	503.019	55.6015	1.11022e-16	6.49356
3376	he_25588	2.07233	5.47402	388.768	20.1501	0	7.55151
3366	he_25588	4.9412	4.76864	362.748	32.3521	0	6.19796
3356	he_25588	35.0647	5.0934	326.867	34.2552	1.93179e-14	3.22061
1642	he_25668	16666	251.49	19796.4	414.833	5.40475e-11	0.248327
1632	he_25668	17199.2	296.999	20195.5	386.061	3.82973e-10	0.23169
1622	he_25668	18266.1	162.692	19264.3	222.114	0.000189402	0.076756
3387	he_25669	393.447	32.0184	194.944	27.8452	4.45103e-05	-1.01311
3407	he_25669	293.806	24.6636	168.232	18.2073	0.000609804	-0.80441
3397	he_25669	289.982	31.9303	173.683	20.819	0.0099584	-0.739504
3449	he_25674	515.153	33.1507	80.8875	14.8324	0	-2.67101
3459	he_25674	428.843	28.3524	79.2389	15.5621	0	-2.43617
3469	he_25674	448.014	39.9648	80.4359	11.1077	3.77476e-15	-2.47763
3511	he_25688	189.366	21.0107	67.3897	13.2689	5.85286e-05	-1.49057
3521	he_25688	142.943	15.6082	54.3212	10.6761	0.000260115	-1.39585
3531	he_25688	133.162	16.7413	59.1567	10.8934	0.00393481	-1.17057
3562	he_25690	15027.7	150.995	19733.2	204.725	0	0.393
1549	he_25690	18264.9	221.802	21130.1	220.691	0	0.210228
3552	he_25690	16092.1	149.519	18331.7	310.521	4.65912e-11	0.187991
1539	he_25690	18988.8	199.999	21003.5	261.868	5.69338e-10	0.145483
3542	he_25690	18977.7	179.7	20611.6	477.473	0.000840247	0.119151
1529	he_25690	20203.1	142.486	21305.9	340.388	0.00182534	0.0766728
3624	he_25699	5890.73	59.465	2924.19	82.1191	0	-1.01041
3614	he_25699	6442.63	99.0116	2697.12	121.815	0	-1.25623
3604	he_25699	7300.98	167.11	3018.5	116.654	0	-1.27426
3655	he_25704	44.7157	9.77834	175.436	18.8466	1.29266e-07	1.9721
3645	he_25704	57.2563	9.15663	157.718	18.0864	2.14669e-05	1.46184
3635	he_25704	82.454	9.84372	162.088	19.8951	0.00154067	0.97512
3686	he_25712	2407.7	80.2911	111.982	7.05373	0	-4.42632
3666	he_25712	2438.59	103.549	72.7048	14.3455	0	-5.06786
3676	he_25712	2477.26	156.303	85.6963	13.8029	0	-4.85337
3717	he_25728	10704.4	167.561	1019.9	56.745	0	-3.3917
3697	he_25728	10897.8	235.187	789.982	40.7283	0	-3.78607
1653	he_25728	8508.39	185.944	522.308	62.777	0	-4.02591
3707	he_25728	10962.2	259.031	841.454	59.388	0	-3.70351
1673	he_25728	10536.8	330.738	851.448	75.2833	0	-3.62937
1663	he_25728	9663.06	422.657	712.871	55.0375	0	-3.76077
3748	he_25733	247.004	17.6519	56.286	8.20832	3.9968e-15	-2.13369
3728	he_25733	214.82	20.2966	42.7195	10.4568	6.58131e-10	-2.33016
3738	he_25733	209.287	23.6338	47.9886	14.3091	1.02945e-06	-2.12472
1694	he_25733	172.567	22.0097	40.4748	9.10205	5.85111e-06	-2.09206
1684	he_25733	109.114	11.476	23.4072	8.80342	1.08134e-05	-2.2208
1704	he_25733	195	31.5761	38.7213	9.57357	5.69691e-05	-2.33228
1601	he_25747	13179.4	110.706	4613.26	113.924	0	-1.51443
3769	he_25747	10984.9	136.533	3724.99	98.1961	0	-1.56021
1591	he_25747	14006.3	186.353	4281.85	132.94	0	-1.70977
1611	he_25747	12864.3	199.132	4584.71	104.738	0	-1.48847
3759	he_25747	12673.4	213.49	4144.22	168.579	0	-1.61263
3779	he_25747	10346.7	248.563	4154.82	96.4113	0	-1.31631
1560	he_25748	3810.6	61.6346	1360.58	71.8305	0	-1.4858
1570	he_25748	3553.59	118.866	1458.37	40.4924	0	-1.28492
1580	he_25748	3483.62	121.378	1431.36	90.2523	0	-1.2832
3800	he_25748	2543.65	125.485	1027.38	80.7922	0	-1.30793
3790	he_25748	3075.53	182.177	1274.84	72.0866	0	-1.27052
3810	he_25748	2404.29	150.895	1127.59	67.9537	1.90736e-13	-1.09237
3831	he_25753	1006.21	47.8997	620.371	36.3035	5.6723e-09	-0.697733
3821	he_25753	1179.57	111.146	621.882	23.8471	5.04004e-06	-0.923554
3841	he_25753	950.246	51.9472	696.142	40.8046	0.000566057	-0.448919
3862	he_25776	9327.75	119.082	1499.49	58.0998	0	-2.63706
3872	he_25776	8635.82	166.23	1686.6	74.0057	0	-2.35621
3852	he_25776	10669.7	237.994	1651.06	59.0612	0	-2.69206
774	he_26104	1118.13	55.5929	232.986	21.854	0	-2.26278
764	he_26104	1131.71	80.7026	211.337	21.7028	0	-2.42089
754	he_26104	1232.74	90.5331	229.647	19.6726	0	-2.42438
3965	he_26137	4127.77	353.358	1055.04	91.1475	3.33067e-16	-1.96807
3955	he_26137	4386.22	416.07	1034.9	105.527	3.84137e-14	-2.08349
3945	he_26137	5329.3	521.318	1212.59	137.301	1.24123e-13	-2.13586
19	he_26246	35778.7	333.935	25995.4	719.471	0	-0.460845
29	he_26246	34567.4	383.211	27794.8	442.841	0	-0.314599
9	he_26246	35923.6	189.038	26135.8	850.307	0	-0.458907
91	he_26307	8551.96	290.173	19496.6	444.08	0	1.1889
81	he_26307	8828.44	249.46	18608	585.971	0	1.07569
71	he_26307	8801.51	369.103	17234	426.938	0	0.969439
102	he_26540	37815.5	267.512	24363.2	456.152	0	-0.634273
122	he_26540	36304.3	127.419	28433.4	504.141	0	-0.352555
112	he_26540	37731.3	334.91	27365.7	685.524	0	-0.463391
935	he_26755	261.125	34.2503	122.63	22.4041	0.00375932	-1.09042
945	he_26755	228.781	26.4492	120.588	19.0873	0.0056754	-0.923882
1576	he_27079	17.7496	5.48488	75.239	12.7729	0.000902949	2.08369
1556	he_27079	35.268	5.69473	87.3516	13.3994	0.00347058	1.30847
1566	he_27079	20.1874	5.56955	72.3633	14.1377	0.00454729	1.8418
1587	he_27218	6717.25	114.236	807.074	52.28	0	-3.0571
1607	he_27218	6085.35	107.593	786.961	37.3252	0	-2.95098
1597	he_27218	6269.92	137.128	820.935	64.3008	0	-2.93311
2597	he_27671	382.054	35.8665	605.335	43.7342	0.000127553	0.663958
2577	he_27671	505.517	39.2681	704.575	53.7745	0.00296947	0.478992
1618	he_27706	19805.2	157.6	17586.8	253.42	7.82041e-13	-0.171388
1638	he_27706	18030.2	186.074	16194.7	226.445	1.87264e-09	-0.154898
1090	he_27875	215.3	17.9446	647.839	38.5128	0	1.58929
1100	he_27875	208.988	25.5748	607.828	43.6021	1.06359e-13	1.54024
1110	he_27875	210.418	19.7401	609.956	55.9061	1.15666e-10	1.53545
3290	he_27876	1387.39	66.201	6340.04	155.561	0	2.19212
3310	he_27876	1112.12	53.1374	5424.86	139.056	0	2.28627
3300	he_27876	1308.23	64.7132	6462.9	201.905	0	2.30457
1721	he_28378	30622.6	324.726	37594.6	367.943	0	0.29593
1731	he_28378	28876.1	182.859	33669.2	385.811	0	0.221556
1711	he_28378	32141.5	200.631	38333.1	897.675	6.72995e-12	0.254154
1742	he_28451	29413.8	213.53	24395.2	391.615	0	-0.269895
1752	he_28451	27724.7	203.76	24718.7	396.384	7.19458e-11	-0.16557
3019	he_28473	63.1377	14.3653	27785.4	169.449	0	8.78161
3029	he_28473	32.8781	17.5268	25479.6	367	0	9.598
3009	he_28473	78.9309	17.6928	28407	432.965	0	8.49144
1783	he_28474	202.074	31.6931	40763.1	438.96	0	7.65624
1773	he_28474	205.58	19.0891	40714	467.02	0	7.62968
1793	he_28474	188.001	16.7122	36808.4	456.248	0	7.61315
1824	he_28476	69.7231	7.12708	12129	153.065	0	7.44261
1804	he_28476	70.7984	11.2429	13217.5	252.433	0	7.54451
1814	he_28476	63.0057	12.7421	13650.1	263.2	0	7.75922
1845	he_28479	12.736	5.09671	63.0354	11.9515	0.00214573	2.30725
1855	he_28479	8.42159	3.60674	77.1893	23.7814	0.00967148	3.19624
1886	he_28480	164.57	19.5974	11138.8	165.313	0	6.08075
1866	he_28480	181.732	19.1291	12597.4	192.472	0	6.11517
1876	he_28480	173.367	24.2051	12404.1	268.107	0	6.16084
1897	he_28482	184.892	14.6588	21984.8	220.309	0	6.89368
1917	he_28482	150.804	13.6389	18779.9	192.836	0	6.96037
1907	he_28482	153.267	20.8813	20645.1	373.475	0	7.07361
1948	he_28483	15.9678	7.12	422.095	33.2079	0	4.72433
1928	he_28483	36.9859	9.23232	413.906	37.7241	0	3.48425
1938	he_28483	20.7012	9.74126	427.684	53.4644	1.23634e-12	4.36876
3228	he_28711	997.598	60.7709	730.006	54.5391	0.00318652	-0.45055
1959	he_28713	533.105	41.1367	288.37	30.851	2.36285e-05	-0.886496
1969	he_28713	422.423	24.433	271.858	18.5986	3.53955e-05	-0.635837
1979	he_28713	459.407	35.5572	263.674	41.3209	0.00155782	-0.801019
1017	he_28825	335.122	22.4463	99.3802	22.0034	1.26778e-10	-1.75366
1007	he_28825	284.598	32.9412	76.7888	13.6155	4.73066e-07	-1.88996
997	he_28825	270.84	34.8262	77.9499	17.0679	1.61806e-05	-1.79682
2000	he_28866	30324	186.621	36874.6	328.897	0	0.282168
2010	he_28866	28277.8	212.979	32276.2	214.286	0	0.190797
1990	he_28866	32768.2	233.601	38564.9	521.525	0	0.234991
691	he_28961	9466.04	68.6031	2237.26	114.544	0	-2.08103
711	he_28961	9879.43	124.922	2716.89	68.5458	0	-1.86247
701	he_28961	9735.63	187.095	2267.07	77.7217	0	-2.10245
2021	he_28969	5276.5	142.926	598.02	53.3368	0	-3.14131
2041	he_28969	4632.74	129.039	663.888	54.1977	0	-2.80285
2031	he_28969	4780.36	169.091	628.291	63.1267	0	-2.92762
2062	he_29126	19577.5	217.683	21346.4	347.391	9.28642e-06	0.124793
2072	he_29126	18013.4	205.457	19040.7	272.458	0.00171128	0.080015
3375	he_2914	7204.25	130.079	10167.2	185.004	0	0.496997
3365	he_2914	7691.92	184.992	10526.2	232.12	0	0.452571
3355	he_2914	8787.89	120.157	10659.4	186.425	0	0.278538
72	he_29304	8423.03	296.395	5865.2	221.683	2.59951e-11	-0.52216
92	he_29304	8330.07	240.313	6632.72	208.83	3.45745e-07	-0.328728
82	he_29304	8433.15	351.434	6449.6	390.783	0.000343607	-0.386862
3396	he_2937	19.4336	11.0823	1464.89	62.7672	0	6.23609
3406	he_2937	19.5232	6.15598	1382.52	76.3969	0	6.14597
3386	he_2937	49.1877	13.0736	1447.6	86.3386	0	4.87922
2124	he_29411	29219.3	351.319	37171.5	300.518	0	0.347278
2114	he_29411	31969.8	251.496	37865.1	365.789	0	0.24416
2134	he_29411	27076.7	260.96	32077.1	328.541	0	0.24449
3195	he_29521	22149.7	216.711	15241.7	375.79	0	-0.539264
3205	he_29521	20448.7	385.305	16533	293.798	4.32987e-15	-0.306663
3215	he_29521	17604.8	167.687	14693.7	317.731	4.32987e-15	-0.260776
2145	he_29648	9527.89	123.426	1453.48	52.9998	0	-2.71265
2165	he_29648	7922.05	91.483	1311.12	63.6199	0	-2.59507
2155	he_29648	8686.02	146.161	1378.98	48.8899	0	-2.6551
3437	he_2975	26125.2	257.872	38037	778.153	0	0.541964
3427	he_2975	28541.3	233.102	36455.6	518.527	0	0.353088
3417	he_2975	33486	218.21	39815.5	932.531	1.55513e-11	0.249772
2196	he_29964	8475.25	126.302	1966.34	73.734	0	-2.10774
2176	he_29964	9696.54	123.869	2168.46	143.096	0	-2.1608
2186	he_29964	8887.36	176.811	2039.8	111.896	0	-2.12333
418	he_29970	1447.96	60.565	845.345	53.2915	4.2949e-12	-0.776414
408	he_29970	1517.31	81.9975	852.656	66.0915	3.65572e-09	-0.831477
428	he_29970	1460.47	69.125	1003.31	59.4987	3.79156e-06	-0.54166
2347	he_30153	693.677	38.0092	3876.92	162.233	0	2.48258
2337	he_30153	713.56	58.3501	3367.14	132.608	0	2.23842
2327	he_30153	769.102	33.9531	3369.34	138.41	0	2.13122
2238	he_30317	20338.8	181.597	17374.6	335.174	5.26246e-14	-0.227253
2258	he_30317	17158.4	167.485	15456.3	236.385	1.84808e-08	-0.150721
2248	he_30317	18428.7	200.476	16999.6	200.221	1.54972e-06	-0.116453
614	he_30405	249.31	13.8212	920.993	42.3939	0	1.88525
594	he_30405	256.897	26.9043	693.908	42.8921	4.44089e-16	1.43356
604	he_30405	249.338	29.029	729.363	59.2905	2.77778e-12	1.54854
2289	he_30566	8387.42	95.9295	1477.28	70.9808	0	-2.50529
2279	he_30566	8820.35	143.198	1470.77	85.18	0	-2.58426
2269	he_30566	9909.92	170.159	1530.28	106.257	0	-2.69508
2320	he_30695	28830	148.633	37566.6	360.319	0	0.381877
2310	he_30695	31500.5	320.212	43759.9	453.712	0	0.474234
2300	he_30695	35349.5	190.779	46296.6	585.447	0	0.389217
2341	he_30831	20984.5	312.837	24310.7	227.645	0	0.212265
2351	he_30831	19564.5	202.184	21709.6	236.869	3.46922e-12	0.150095
2331	he_30831	23259.8	177.227	25228.5	504.135	0.00013459	0.117214
2362	he_30884	12633.8	170.493	9035.41	147.097	0	-0.483632
2382	he_30884	10707.3	129.746	7993.19	157.017	0	-0.421745
2372	he_30884	11384.1	239.276	8585.63	278.552	1.71974e-13	-0.407027
2393	he_30889	11503.3	137.438	10710.5	228.103	0.00567518	-0.103017
2434	he_30905	9704.72	135.303	6360.72	133.142	0	-0.609497
2424	he_30905	10732.9	166.751	6714.08	171.351	0	-0.676785
2444	he_30905	9048.75	128.403	6092.49	154.079	0	-0.570686
2475	he_31014	1621.62	66.0037	1905.45	86.578	0.00756084	0.232696
2506	he_31018	162.361	28.0609	4108.65	165.178	0	4.66139
2486	he_31018	237.628	21.042	4721.66	226.734	0	4.31252
2496	he_31018	169.157	20.9127	4321.6	253.894	0	4.67513
2537	he_31019	5.16037	8.73535	97.4942	24.4585	0.00131858	4.23977
2548	he_31029	58.361	10.0683	8509.1	170.26	0	7.18786
2558	he_31029	41.3718	13.2736	7978.22	191.435	0	7.59128
2568	he_31029	37.3148	13.3633	7314.61	191.431	0	7.61489
2599	he_31030	176.835	28.0005	26704.6	247.514	0	7.23854
2589	he_31030	165.672	20.0375	29537.6	384.877	0	7.47808
2579	he_31030	213.38	12.6478	30786.1	441.834	0	7.17271
2610	he_31031	109.369	14.0737	8412.82	188.993	0	6.26532
2620	he_31031	77.8338	18.1394	7908.26	184.854	0	6.66682
2630	he_31031	81.3616	14.5176	7359.1	195.685	0	6.49904
2641	he_31032	210.001	25.6587	26088.1	307.46	0	6.95685
2661	he_31032	157.369	18.5791	20686.5	249.394	0	7.03839
2651	he_31032	139.68	16.3374	23406	300.448	0	7.38861
2682	he_31033	9.16942	10.8243	663.284	39.2181	0	6.17665
2692	he_31033	5.45066	7.0638	715.831	50.1382	0	7.03704
2672	he_31033	29.6714	5.61271	663.283	51.5069	0	4.48248
2703	he_31035	38332.7	189.247	31111.7	547.028	0	-0.301121
2723	he_31035	29892.4	157.448	24921.4	384.801	0	-0.262393
2713	he_31035	33135.4	365.785	28528.6	327.707	0	-0.215964
2980	he_31077	84.9079	12.5342	29.1919	8.36633	0.006717	-1.54033
753	he_31221	209.608	16.3028	74.3382	10.1023	2.22142e-08	-1.49552
773	he_31221	195.612	20.317	74.7312	10.6303	1.92732e-05	-1.38821
763	he_31221	190.957	22.4679	62.9895	11.5938	3.1839e-05	-1.60006
2734	he_31383	43.9449	9.76354	656.775	38.4846	0	3.90163
2744	he_31383	16.0628	9.39214	619.761	46.1871	0	5.26992
2754	he_31383	20.417	14.2619	644.784	53.5766	0	4.98098
1503	he_31641	16755.6	119.983	27914.9	275.159	0	0.736388
1493	he_31641	17281.7	154.218	28622.4	302.471	0	0.727897
1513	he_31641	15970.5	186.354	24957.4	249.828	0	0.644061
3563	he_32	708.072	47.0264	2551	49.8129	0	1.8491
3543	he_32	768.997	32.4646	2440.95	99.355	0	1.66639
3553	he_32	747.536	47.6698	2334.66	123.843	0	1.643
2916	he_32353	47.0877	12.9701	1618.31	71.5909	0	5.103
2926	he_32353	40.9503	12.3797	1522.17	81.6645	0	5.21612
2936	he_32353	19.5491	13.1437	1539.97	86.3342	0	6.29966
1028	he_32394	9163.6	88.8854	10058.2	221.374	0.000119616	0.134387
1038	he_32394	9083.25	152.241	9763.83	170.4	0.00202465	0.104238
2796	he_32726	16706.1	167.431	13107.1	240.269	0	-0.350024
2816	he_32726	13446	178.776	10786.9	195.111	0	-0.317904
2806	he_32726	14546.8	348.842	12475.6	228.497	2.00872e-06	-0.221597
2878	he_33125	963.222	65.2427	311.263	30.2961	0	-1.62974
2868	he_33125	822.128	87.4158	220.607	28.3478	1.13967e-09	-1.89788
2858	he_33125	710.016	78.9871	204.796	29.3449	3.02065e-08	-1.79367
904	he_33220	979.262	55.0312	3723.1	50.7584	0	1.92674
914	he_33220	993.364	47.267	3486.58	127.734	0	1.81142
924	he_33220	981.158	50.8113	3630.24	186.154	0	1.88751
3722	he_3332	94.0931	11.8871	35.6569	8.25607	0.00321242	-1.39991
3422	he_33592	9398.49	123.177	10697	205.267	3.98307e-08	0.186706
3412	he_33592	10477.6	132.499	9636.8	182.084	0.000465054	-0.120682
3432	he_33592	8331.18	130.948	8936.07	174.715	0.00397554	0.10112
1844	he_33594	924.918	21.1878	612.296	55.1415	1.85661e-06	-0.595097
1834	he_33594	1033.12	77.8441	593.148	53.7063	1.82132e-05	-0.800547
1854	he_33594	932.986	81.244	585.784	65.2673	0.00239947	-0.671487
3002	he_33647	7945.82	92.2232	2032.8	46.5469	0	-1.96673
2982	he_33647	9831.22	153.801	2547.55	67.1544	0	-1.94826
2992	he_33647	8528.98	204.423	2353.75	81.5424	0	-1.85741
3013	he_33649	3243.77	63.025	579.014	46.0208	0	-2.486
3033	he_33649	2822.1	69.9195	540.843	38.0644	0	-2.38349
3023	he_33649	3201.79	120.99	601.223	38.101	0	-2.41291
3095	he_34254	2503.04	49.4129	865.856	63.0603	0	-1.53148
3075	he_34254	3127.61	65.8686	1045.84	95.8664	0	-1.5804
3085	he_34254	2647.78	81.9592	934.685	64.8233	0	-1.50223
3188	he_34734	2.05762	3.62811	61.5387	13.1303	0.000503018	4.90244
3178	he_34734	1	3.17587	85.448	29.8944	0.0081588	6.41698
3240	he_35178	4574.56	107.389	921.915	58.4104	0	-2.31093
3250	he_35178	4177.94	121.613	793.713	44.6879	0	-2.3961
3230	he_35178	5049.11	145.044	889.07	72.9559	0	-2.50566
320	he_35232	783.827	53.9544	4403.3	182.69	0	2.48998
330	he_35232	793.228	63.8189	4314.73	201.233	0	2.44346
340	he_35232	795.633	58.8123	4740.41	277.77	0	2.57484
3261	he_35269	51.4419	8.57298	637.737	30.6355	0	3.63195
3281	he_35269	17.9272	10.3115	640.234	42.5655	0	5.15838
3271	he_35269	16.574	8.73834	658.411	61.2767	0	5.31199
3414	he_35306	357.359	32.2334	147.681	20.9674	2.14647e-06	-1.27489
3424	he_35306	324.11	26.4542	179.48	18.091	0.000136865	-0.852663
3434	he_35306	235.693	25.0819	135.339	11.7278	0.00295685	-0.800332
2912	he_35559	1641.1	59.9129	5169.21	121.591	0	1.65528
2892	he_35559	1988.81	67.2418	4932.78	176.477	0	1.31049
2902	he_35559	1732.75	96.2506	4961.17	223.693	0	1.51762
273	he_35606	11572.8	214.94	17643.8	339.183	0	0.608426
263	he_35606	11685.1	196.078	15520.7	322.955	0	0.409521
253	he_35606	11732.3	286.568	15209.5	260.851	0	0.374489
3292	he_35611	9577.9	264.312	7052.67	259.131	4.69897e-11	-0.44154
3312	he_35611	10383.9	210.046	9080.13	233.456	8.4288e-05	-0.193561
3302	he_35611	10378.8	397.864	8674.99	234.788	0.000481861	-0.258711
3848	he_35693	341.513	37.0154	58.2502	8.65988	6.65954e-11	-2.55161
3858	he_35693	299.749	45.3115	56.9043	15.5914	7.27e-06	-2.39714
3868	he_35693	278.73	45.5089	58.4393	10.9846	3.40057e-05	-2.25386
3343	he_35750	10064.8	159.926	14711.3	213.929	0	0.547608
3333	he_35750	10892.9	242.561	15862.7	226.767	0	0.542256
3323	he_35750	12449.5	196.564	16750.3	390.183	0	0.428104
2879	he_360	1	1.41162	173.479	38.8945	2.97108e-05	7.43862
2869	he_360	1	1.26312	149.091	35.6924	0.000101193	7.22005
1555	he_36376	683.49	42.3837	205.525	24.6784	0	-1.7336
1575	he_36376	598.722	49.8329	189.549	17.281	2.42739e-12	-1.65932
1565	he_36376	593.561	52.1516	186.15	28.6948	5.02802e-10	-1.67293
1699	he_36383	436.341	33.1611	174.914	14.2602	2.87557e-10	-1.31881
1689	he_36383	439.601	38.3526	183.12	23.5856	4.78539e-07	-1.26341
1679	he_36383	527.865	57.1497	199.757	26.4454	2.44395e-06	-1.40193
2890	he_365	180.981	21.97	1969.41	54.463	0	3.44386
2910	he_365	132.954	12.568	1675.69	56.7793	0	3.65576
2900	he_365	132.074	22.9783	1795.71	80.8239	0	3.76513
1032	he_36506	478.705	26.2357	202.263	33.8094	1.16726e-08	-1.2429
1042	he_36506	467.838	45.9789	220.234	20.6613	1.29369e-05	-1.08697
1052	he_36506	506.136	49.0562	269.112	19.8021	6.91988e-05	-0.911319
3385	he_36543	1436.67	55.2259	154.738	19.1987	0	-3.21483
3405	he_36543	1204.55	46.4849	150.671	25.9789	0	-2.99903
3395	he_36543	1288.89	68.6177	150.457	27.2749	0	-3.0987
3426	he_36553	29.0264	12.0417	370.036	32.1744	0	3.67223
3416	he_36553	58.4462	6.84621	346.731	28.1903	0	2.56864
3436	he_36553	23.8057	7.14179	333.071	33.6845	3.33067e-16	3.80645
3467	he_36556	1287.28	38.6331	536.273	37.398	0	-1.26328
3447	he_36556	1579.61	60.3632	561.327	63.2962	0	-1.49265
3457	he_36556	1381.48	80.2153	529.751	36.2821	0	-1.38282
1331	he_36597	245.824	21.857	1071.09	55.0354	0	2.12337
1311	he_36597	228.456	23.2378	892.078	45.2501	0	1.96526
1321	he_36597	216.083	24.5433	936.246	55.6541	0	2.1153
3529	he_36616	21319.1	221.143	24301.7	119.936	0	0.188911
3560	he_36649	3.39309	3.6652	117.304	21.8752	8.10277e-06	5.1115
3550	he_36649	1.78089	4.52948	116.334	31.4558	0.000847166	6.02953
3540	he_36649	32.2186	6.34404	100.11	21.3741	0.0066372	1.63562
3591	he_36788	739.55	29.7836	6248.39	125.588	0	3.07876
3581	he_36788	766.76	63.1283	6465.65	169.128	0	3.07595
3571	he_36788	933.828	47.196	6765.77	283.27	0	2.85703
3612	he_36832	8144.06	150.107	3873.54	119.406	0	-1.0721
3602	he_36832	9199.13	182.492	4081.46	190.495	0	-1.17241
3622	he_36832	7464.12	174.578	3815.97	112.387	0	-0.96792
3664	he_36910	38361.6	372.712	24484.7	478.823	0	-0.647783
3674	he_36910	33632.7	435.971	23753.5	389.568	0	-0.501724
3684	he_36910	30769.7	254.637	26270.4	353.416	0	-0.228073
2664	he_3702	32.6991	7.81621	183.882	22.2449	2.36174e-08	2.49146
2654	he_3702	31.7745	10.7133	163.795	26.0924	2.41374e-05	2.36595
2644	he_3702	68.9871	10.4823	177.52	23.5432	0.000162862	1.36358
3610	he_37052	657.227	34.8539	382.686	25.9006	2.30634e-08	-0.780231
3600	he_37052	740.14	45.0753	348.177	46.3842	3.43558e-08	-1.08798
3620	he_37052	576.063	32.1392	321.061	32.184	7.15449e-07	-0.843379
1606	he_37062	733.416	38.5817	254.354	33.4107	0	-1.52779
1586	he_37062	747.679	50.7122	208.45	30.7943	1.11022e-16	-1.84272
1596	he_37062	712.849	60.1066	203.059	23.6214	4.62852e-13	-1.8117
3695	he_37317	25507.5	237.858	17695.2	482.493	0	-0.527566
3705	he_37317	22469.8	352.651	17377.2	289.19	0	-0.370791
3715	he_37317	20768.8	173.583	18703.1	217.839	9.35252e-13	-0.151143
3726	he_37337	4553.84	206.837	1967.48	82.4493	0	-1.21073
3736	he_37337	4090.79	181.647	1934	66.0195	0	-1.08079
3746	he_37337	3703.4	157.298	1976.48	70.1093	0	-0.90592
3798	he_37851	6424.15	182.446	1232.94	48.5076	0	-2.3814
3788	he_37851	7129.93	305.962	1314.42	84.7264	0	-2.43946
3808	he_37851	5767.04	357.945	1300.22	55.9761	0	-2.14907
3829	he_37854	12726.7	240.865	6978.51	143.354	0	-0.866873
3819	he_37854	14184	272.418	7183.34	272.352	0	-0.981539
3839	he_37854	11516.2	406.437	7093.44	233.336	0	-0.699103
160	he_37871	4801.93	140.31	759.55	56.8454	0	-2.6604
180	he_37871	4500.94	149.229	869.956	57.9558	0	-2.37121
170	he_37871	4535.85	232.649	669.409	40.845	0	-2.76041
3850	he_37889	53.0623	6.38273	1663.71	112.478	0	4.97057
3870	he_37889	20.9791	6.0759	1653.69	119.912	0	6.30059
3860	he_37889	20.0712	9.69125	1662.54	129.46	0	6.37211
3881	he_37892	36.3673	7.13788	525.933	42.2509	0	3.85417
3901	he_37892	10.188	6.10784	632.963	60.8852	0	5.95718
3891	he_37892	5.9166	6.79471	709.829	86.2944	2.55351e-15	6.90656
3922	he_38204	4.92877	6.15506	499.099	59.1055	2.44249e-15	6.66195
3932	he_38204	6.00286	7.04825	451.48	58.5487	5.92082e-13	6.23287
3912	he_38204	27.7734	3.65364	424.957	54.2944	4.33398e-12	3.93554
3953	he_38247	9389.4	307.777	4409.95	182.25	0	-1.09027
3943	he_38247	10249	520.506	4280.27	197.313	0	-1.25971
3963	he_38247	8443.23	498.305	4240.45	182.979	1.4766e-14	-0.993578
2941	he_383	17.9633	7.59841	99.3333	15.6055	8.93911e-05	2.46722
3259	he_38407	9668.41	135.745	4982.01	108.537	0	-0.956551
3279	he_38407	7563.44	97.442	4242.18	131.083	0	-0.834236
3269	he_38407	8674.62	150.366	5157.05	135.909	0	-0.750256
1772	he_38408	94.9497	11.1754	12.1179	4.06193	7.52222e-07	-2.97002
1782	he_38408	58.4505	6.26108	8.82583	6.19531	0.000297338	-2.72741
1792	he_38408	62.5707	10.2475	12.1952	4.92784	0.00230511	-2.35917
2804	he_38409	17280.6	188.809	20497.6	237.276	0	0.246299
2814	he_38409	15172.9	245.502	17669.2	222.152	2.83107e-14	0.219735
2794	he_38409	19254.9	269.922	22588.8	409.241	5.03642e-12	0.230381
1276	he_38410	270.954	23.3674	65.9011	9.96644	1.62881e-11	-2.03967
1286	he_38410	219.072	19.2866	65.4025	16.5366	5.53315e-07	-1.74399
1296	he_38410	213.464	26.1319	65.2611	12.0325	1.58902e-05	-1.7097
58	he_38575	13312.3	192.391	8145.35	265.323	0	-0.708714
48	he_38575	13507.5	326.307	7508.25	210.444	0	-0.84721
38	he_38575	12783.7	377.959	7614.22	188.658	0	-0.747535
89	he_38577	461.304	54.8729	879.656	57.6336	2.60439e-07	0.931221
79	he_38577	400.407	55.3618	747.484	57.134	1.69623e-05	0.900576
69	he_38577	472.483	47.9431	819.588	74.6476	9.84674e-05	0.794636
100	he_38583	2268.26	157.837	3539.71	170.088	2.97726e-08	0.642044
120	he_38583	2514.99	182.202	4423.5	315.839	9.48542e-08	0.814635
110	he_38583	2328.44	190.726	3863.48	272.288	2.33894e-06	0.730538
1063	he_38587	10123.9	82.8947	34385.5	201.502	0	1.76403
1083	he_38587	9744.99	73.4832	31839.8	303.141	0	1.7081
1073	he_38587	10041.4	200.577	31542.2	530.825	0	1.65133
131	he_38779	221.733	32.5017	54.9019	10.5053	3.00871e-05	-2.01389
151	he_38779	237.457	30.6704	72.9864	17.2172	6.29282e-05	-1.70196
141	he_38779	181.859	30.3659	58.4347	15.5123	0.00229235	-1.63792
213	he_38904	17001.4	188.466	8030.31	181.2	0	-1.08213
193	he_38904	17625.4	394.182	7488.99	216.718	0	-1.23481
203	he_38904	17629.1	229.623	7854.07	388.486	0	-1.16644
306	he_39302	28167.6	299.803	29513.6	442.854	0.00781296	0.0673413
337	he_39456	5612.13	157.955	2890.79	106.323	0	-0.957085
327	he_39456	5650.38	206.385	2649.69	93.7208	0	-1.09253
317	he_39456	5256.95	201.291	2520.45	89.9671	0	-1.06054
2802	he_39499	6.50838	6.669	82.3056	22.2356	0.00353894	3.66062
368	he_39736	5190.31	129.856	539.24	38.5502	0	-3.26682
348	he_39736	5246.37	170.136	499.782	45.8673	0	-3.39195
358	he_39736	5187.17	196.973	455.197	34.6051	0	-3.51038
399	he_39883	29806.2	187.797	31852.7	229.927	3.44214e-12	0.0958073
420	he_40110	15033	271.222	12745.8	222.279	3.38889e-10	-0.238118
410	he_40110	14781.7	224.465	13176.1	225.526	1.47079e-06	-0.165892
430	he_40110	14594.1	196.902	13456.1	216.917	0.000247733	-0.117121
461	he_40138	11668.5	165.3	13970.1	214.254	0	0.259723
441	he_40138	11867.8	188.951	14181.9	331.365	7.18595e-10	0.256992
451	he_40138	12016.7	136.922	13221.8	209.77	9.95316e-07	0.137875
482	he_40142	5682.1	106.844	49082.2	452.084	0	3.1107
492	he_40142	5745.15	125.501	52149.5	526.434	0	3.18224
472	he_40142	5509.52	120.036	50843.7	834.895	0	3.20607
513	he_40162	9625.38	154.83	25394.3	228.913	0	1.39959
523	he_40162	9413.79	127.015	26919.6	347.21	0	1.51581
503	he_40162	9729.06	123.578	27833.1	551.585	0	1.51643
554	he_40174	601.339	46.4262	2766.69	95.3955	0	2.20191
534	he_40174	579.531	28.7806	2658.44	99.7291	0	2.19762
544	he_40174	569.628	51.2835	2457.61	95.0047	0	2.10916
585	he_40343	33910.9	192.416	40618.2	328.629	0	0.260376
575	he_40343	34658.9	217.169	37855.7	260.16	0	0.127286
565	he_40343	35736.5	269.771	41216.8	849.264	3.30094e-10	0.205835
3458	he_4037	15932.8	145.092	10503.5	180.486	0	-0.601127
3448	he_4037	18485.5	223.665	11023.5	308.374	0	-0.745813
3468	he_4037	14588.8	160.838	10388.1	223.286	0	-0.489923
3656	he_4064	2208.27	65.8108	6206.59	140.611	0	1.49088
3646	he_4064	2313.37	101.506	5820.07	121.864	0	1.33104
3636	he_4064	2633.02	117.769	6557.83	182.463	0	1.3165
616	he_40709	7939.34	112.753	5208.55	116.744	0	-0.608138
606	he_40709	8142.23	136.89	4785.65	171.841	0	-0.76671
596	he_40709	7043.04	135.509	4370.55	196.941	0	-0.688384
647	he_40719	33048.7	169.187	39539.4	692.989	0	0.258697
637	he_40719	33945.2	202.725	37237.2	389.276	3.17524e-14	0.133535
627	he_40719	34892.2	236.391	40729.8	883.188	7.10765e-11	0.223181
678	he_40953	2815	68.0414	13138.5	208.86	0	2.2226
658	he_40953	2848	118.463	12515.1	221.222	0	2.13565
668	he_40953	2776.98	107.696	11892.1	360.108	0	2.09842
689	he_40976	41.6752	10.4474	476.588	29.4093	0	3.51548
709	he_40976	34.5071	8.5931	461.64	33.173	0	3.7418
699	he_40976	32.1917	12.1425	451.816	41.9552	0	3.81097
366	he_41210	9191.77	361.819	2105.14	84.5944	0	-2.12642
356	he_41210	7572.29	467.919	1355.42	108.234	0	-2.48199
346	he_41210	5069.32	319.935	939.397	86.6397	0	-2.43199
720	he_41259	7749.59	168.168	1839	84.0326	0	-2.0752
740	he_41259	7284.24	175.072	1666.22	50.4212	0	-2.1282
730	he_41259	7524.98	219.837	1565.77	147.413	0	-2.26482
771	he_41264	24.7515	6.37398	142.408	15.2263	6.1121e-09	2.52444
751	he_41264	29.9172	6.86397	149.206	23.241	1.41431e-05	2.31825
761	he_41264	17.8894	6.04411	135.444	30.7103	0.00053217	2.92053
792	he_41333	2988.25	120.124	12676.8	245.434	0	2.08482
782	he_41333	2992.64	112.021	13035	321.418	0	2.12291
802	he_41333	3210.91	134.907	14759.4	422.507	0	2.20058
2740	he_41344	24.2557	10.3256	301.716	33.2474	4.04565e-13	3.6368
2730	he_41344	42.0389	12.1244	288.414	34.8978	8.53773e-10	2.77834
2750	he_41344	17.0366	10.9857	331.873	50.3912	6.77535e-09	4.28392
3443	he_41735	2046.25	101.126	1201.02	66.8796	5.08564e-11	-0.76872
3453	he_41735	1985	99.5202	1398.05	40.5536	3.62906e-07	-0.505725
3463	he_41735	1754.57	43.3459	1284.45	76.4658	8.02248e-07	-0.449972
2690	he_42176	130.327	23.1829	233.259	27.8151	0.00686586	0.839792
916	he_42309	13.3026	6.84831	60.3812	12.6912	0.00745256	2.18239
957	he_42311	24.3905	8.07745	419.582	23.8705	0	4.10456
947	he_42311	22.3693	11.32	409.821	34.4741	0	4.1954
937	he_42311	34.0276	7.72981	394.979	36.5677	0	3.537
516	he_42318	28.3324	11.1272	563.915	32.5073	0	4.31495
526	he_42318	22.1167	5.49142	732.651	57.5023	0	5.04992
506	he_42318	30.8565	7.48071	677.953	59.9664	0	4.45754
3479	he_4234	4353.13	112.374	3242.61	140.923	4.80494e-09	-0.4249
3489	he_4234	3851.4	135.321	3174.15	143.607	0.00139643	-0.279012
2492	he_42549	500.924	31.8093	229.441	35.4725	4.16646e-07	-1.12647
2482	he_42549	537.819	48.0199	277.445	46.9218	0.000500505	-0.954918
2502	he_42549	429.666	37.9084	265.779	32.4937	0.00426569	-0.692989
3445	he_42966	5047.31	134.962	3170.86	101.643	0	-0.670641
3465	he_42966	3913.99	113.884	2801.23	93.1986	6.83231e-13	-0.482577
3455	he_42966	4580.51	115.275	3408.48	119.212	1.75684e-11	-0.42638
3536	he_43060	5749.45	135.629	4136.21	202.402	2.25808e-10	-0.475115
968	he_43348	10965.5	129.2	8519.95	115.281	0	-0.364056
978	he_43348	11065.2	184.221	8503.86	218.841	0	-0.379837
988	he_43348	10793.3	195.741	8958.84	195.733	1.99439e-10	-0.268747
1019	he_43686	21694.3	258.622	25139.3	309.087	0	0.212626
999	he_43686	22803.6	223.653	25485.3	340.035	2.33538e-11	0.160406
1009	he_43686	22755	240.671	24281.1	396.123	0.000613334	0.0936531
1030	he_43853	17482.5	194.654	8838.26	167.519	0	-0.984073
1040	he_43853	17446.5	191.518	9109.96	236.796	0	-0.937422
1050	he_43853	16825.7	234.372	9431.15	159.329	0	-0.835165
1061	he_44379	1010.56	74.8803	167.854	16.6968	0	-2.58987
1081	he_44379	1745.95	203.759	275.062	34.5061	9.86744e-12	-2.66619
1071	he_44379	1391.69	191.703	202.935	47.5564	1.02558e-08	-2.77774
2561	he_444	9866.85	119.088	25389.2	234.092	0	1.36355
2551	he_444	11102.1	155.842	25168.8	240.889	0	1.18081
2571	he_444	9268.02	176.079	24697.8	312.301	0	1.41405
3362	he_44575	1992.77	75.6595	3128.46	95.9937	0	0.650678
3352	he_44575	2113.02	85.1908	3000.47	77.8528	3.56382e-14	0.505884
3372	he_44575	1717.69	100.41	2632.11	86.1947	7.11931e-12	0.615756
3112	he_44807	1407.49	64.5872	6823.65	184.952	0	2.27742
3122	he_44807	1236.67	54.7956	6462.96	195.462	0	2.38574
3102	he_44807	1492.43	86.867	6641.83	211.198	0	2.15392
1133	he_44968	16.4051	5.51621	77.0492	8.01678	7.45161e-06	2.23163
1123	he_44968	37.7775	6.22933	98.3373	13.8134	0.00106086	1.38021
1143	he_44968	26.2824	7.66794	83.6929	16.2297	0.00611167	1.67101
30	he_45012	28199.3	247.874	36613.3	460.956	0	0.37671
20	he_45012	28784.1	462.459	36064.3	760.086	1.11022e-16	0.3253
10	he_45012	29157.2	212.487	34284.1	604.922	5.55112e-16	0.233689
1174	he_45766	22509.4	105.144	24467.9	304.124	6.86653e-10	0.120362
1154	he_45766	23676.8	275.874	24755.3	313.831	0.00656799	0.0642606
1216	he_46034	6323.97	78.5874	1027.09	36.9178	0	-2.62227
1236	he_46034	6035.67	85.7386	1141.16	48.7572	0	-2.40301
1226	he_46034	6326.39	144.595	1116.05	71.9629	0	-2.50298
649	he_46082	185.012	17.045	49.4168	12.9885	3.33987e-07	-1.90454
629	he_46082	180.314	27.435	37.5511	9.72274	3.99234e-05	-2.26358
639	he_46082	184.202	27.6596	46.8948	10.7751	0.000106655	-1.97379
3530	he_4609	4772.49	120.445	10834.3	242.474	0	1.18279
3520	he_4609	5164.5	177.731	10451.5	189.783	0	1.01701
3510	he_4609	5223.55	221.719	10125.8	348.002	0	0.954929
1267	he_46242	15459	78.8581	2558.52	68.2562	0	-2.59506
1247	he_46242	16206.4	221.254	2171.45	97.6174	0	-2.89984
1257	he_46242	15879	206.686	2453.26	136.807	0	-2.69435
3561	he_4625	2.82529	3.08577	89.8031	13.7936	1.07515e-06	4.99029
3551	he_4625	5.66311	7.05443	74.0252	19.6596	0.0040301	3.70835
1278	he_46408	7189.6	104.613	1204.21	34.9413	0	-2.57782
1288	he_46408	7202.2	107.486	1292.08	87.5092	0	-2.47874
1298	he_46408	7020.3	131.825	1343.97	44.8238	0	-2.38503
1360	he_46744	111.596	11.653	6829.84	101.426	0	5.9355
1340	he_46744	132.821	9.3937	6974.62	147.584	0	5.71456
1350	he_46744	103.027	12.9455	7165.83	158.239	0	6.12004
1371	he_46823	27120.3	216.397	21930	288.478	0	-0.306466
1381	he_46823	25848.4	248.08	21805.7	234.233	0	-0.245373
1391	he_46823	25037.4	315.245	21152.3	386.946	4.21885e-14	-0.243273
1402	he_47085	27872.2	162.751	25839.7	297.53	8.68971e-09	-0.109238
1412	he_47085	26800.2	176.722	25718.7	235.645	0.000549879	-0.0594248
1443	he_47213	17918.5	195.131	13148.6	184.4	0	-0.446536
1433	he_47213	18571.9	219.683	12642.4	266.625	0	-0.554851
1453	he_47213	17058.6	189.033	12589.1	290.258	0	-0.438321
3582	he_4723	2656.82	65.19	7564.92	182.492	0	1.50963
3592	he_4723	2444.84	99.1809	7850.4	203.82	0	1.68303
3572	he_4723	2869.06	110.001	8075.62	308.344	0	1.49299
1464	he_47479	5937.37	116.016	3324.82	132.62	0	-0.83655
1484	he_47479	5579.15	99.7251	3667.28	104.827	0	-0.605337
1474	he_47479	5867.98	179.442	3886.39	215.866	1.12973e-11	-0.594433
1505	he_47496	9868.37	129.2	3314.4	73.2896	0	-1.57406
1495	he_47496	10035.5	108.444	3007.17	132.385	0	-1.73864
1515	he_47496	9481	130.412	3321.76	94.7542	0	-1.51309
1526	he_47498	11257	119.223	6109.95	140.63	0	-0.881592
1546	he_47498	10555.6	119.567	6475	116.633	0	-0.705051
1536	he_47498	10726.2	144.426	6615.4	137.76	0	-0.697236
1588	he_47505	12431.3	126.269	7926.29	78.3604	0	-0.649261
1608	he_47505	11598.5	113.854	8132.86	90.7117	0	-0.512104
1598	he_47505	11984.6	147.138	8705.59	174.289	0	-0.461174
1670	he_47514	7387.77	96.4165	9274.03	195.869	0	0.328059
1660	he_47514	7623.32	151.351	9511.93	287.758	3.72347e-09	0.31932
1650	he_47514	7965.76	133.273	8834.41	241.069	0.0010821	0.149323
2854	he_47515	4883.94	191.472	2242.87	112.809	0	-1.1227
2864	he_47515	4577.96	165.867	2338.68	124.147	0	-0.969013
2874	he_47515	4266.16	189.558	2550.61	65.9006	2.22045e-16	-0.742095
1701	he_47519	12441	150.339	6271.12	112.316	0	-0.988313
1681	he_47519	12980.5	174.463	5655.55	155.449	0	-1.1986
1691	he_47519	12673.6	257.794	6187.31	140.039	0	-1.03445
1712	he_47535	106.052	14.8372	22.5373	7.11536	0.000114694	-2.23439
1732	he_47535	106.058	15.3403	27.5286	8.80284	0.000660186	-1.94585
1722	he_47535	104.709	17.6171	23.2568	7.68146	0.000975772	-2.17066
1753	he_47544	22816.6	231.032	25560.7	317.875	1.54221e-12	0.163844
1763	he_47544	21356.1	173.891	23779.5	353.28	4.07237e-10	0.15507
1743	he_47544	24036.5	144.896	24930.8	319.44	0.00732279	0.0526988
1794	he_47546	19667.9	206.906	21277	229.508	1.16503e-07	0.113449
1784	he_47546	21376.9	381.99	23138.1	171.194	1.50634e-05	0.114216
1805	he_47550	19633.8	184.551	17762	208.129	1.0271e-10	-0.144547
1846	he_47551	13002.3	227.738	21596.9	313.992	0	0.732062
1836	he_47551	14015.4	229.118	21284.5	253.577	0	0.602793
1856	he_47551	12089.9	171.395	19660.2	437.806	0	0.701481
1867	he_47552	21357.1	269.821	18640.6	263.003	3.29448e-12	-0.196271
1908	he_47554	17837.1	172.79	21775.7	363.851	0	0.287838
1898	he_47554	18759.1	172.54	20987.4	213.772	3.33067e-16	0.161934
1918	he_47554	16250.9	629.219	19661.7	321.44	6.99905e-07	0.27487
1939	he_47558	23574.7	265.542	26439.8	335.507	1.10133e-11	0.165471
1929	he_47558	24973.5	204.808	26029.5	325.681	0.0040067	0.0597469
1949	he_47558	21460.4	913.182	24035.4	256.063	0.00415441	0.163484
1980	he_47874	26582.6	310.683	31833.6	227.546	0	0.26007
1970	he_47874	28586.3	358.887	34899.7	480.462	0	0.287889
1960	he_47874	30927.6	420.719	35422.4	533.965	1.65369e-11	0.195769
3925	he_48015	1526.16	93.0887	676.581	61.0263	6.75793e-13	-1.17357
3915	he_48015	1583.2	154.001	685.077	43.6159	1.15495e-07	-1.20851
3935	he_48015	1442.65	125.287	809.396	50.8581	1.21431e-05	-0.833806
1234	he_48075	766.267	49.8533	321.618	33.3056	1.42976e-11	-1.2525
1214	he_48075	788.751	56.1289	345.575	25.9236	6.28159e-11	-1.19057
1224	he_48075	765.59	79.6823	329.602	26.6985	1.83103e-06	-1.21585
1803	he_48076	3104.82	81.5457	1757.85	82.5262	0	-0.820696
1823	he_48076	2726.84	91.155	1648.18	57.6789	0	-0.726354
1813	he_48076	2792.52	132.476	1674.7	87.6657	2.27502e-11	-0.73767
3331	he_48081	1800.86	65.7427	2262.42	81.2244	1.05703e-05	0.32918
3341	he_48081	1573.37	65.391	1950.46	94.7352	0.000897286	0.309961
2053	he_49538	16892.9	158.686	12667	142.175	0	-0.415338
2073	he_49538	14537	199.251	12202.4	239.296	4.78728e-13	-0.252556
2063	he_49538	15845	120.597	13777.5	358.257	1.56911e-07	-0.201713
1203	he_49594	796.945	38.2727	239.448	31.5807	0	-1.73477
1183	he_49594	827.614	50.3906	293.279	22.3668	0	-1.49668
1193	he_49594	771.84	62.525	278.048	35.3247	2.56958e-10	-1.47297
1307	he_49595	171.765	23.4659	69.4148	15.9812	0.00301839	-1.30712
3486	he_49596	940.442	46.4596	394.113	34.9761	0	-1.25473
3476	he_49596	983.275	55.1678	376.457	35.4167	0	-1.38511
3496	he_49596	776.716	42.1179	334.113	27.2064	1.66533e-15	-1.21705
3644	he_4967	5627.31	107.213	1102.94	67.8552	0	-2.35109
3634	he_4967	6007.88	131.398	1065.35	96.5826	0	-2.49553
3654	he_4967	4988.92	130.179	1124.73	71.5254	0	-2.14915
1410	he_49836	4315.23	75.9997	2598.29	67.6294	0	-0.731872
1420	he_49836	4083.02	95.1367	2411.64	61.0167	0	-0.759623
1400	he_49836	4442.12	100.562	2634.89	95.3636	0	-0.753506
211	he_49840	241.529	24.061	48.7508	11.6682	1.50605e-09	-2.3087
191	he_49840	255.351	31.0472	44.9503	10.7395	3.85684e-08	-2.50608
201	he_49840	245.329	32.3744	40.479	11.1389	2.6053e-07	-2.59947
2084	he_50065	5702.13	94.8179	1572.92	54.8665	0	-1.85806
2104	he_50065	4855.05	128.472	1542.73	55.3675	0	-1.654
2094	he_50065	5229.64	168.705	1608.52	52.0145	0	-1.70098
2430	he_50323	6452.05	88.7538	5483.96	122.469	1.36364e-09	-0.23454
2420	he_50323	7028.54	125.625	6351.8	178.894	0.00407255	-0.146059
2115	he_50521	9194.55	117.445	1873.23	56.0017	0	-2.29525
2135	he_50521	7874.54	93.0261	1788.23	88.534	0	-2.13867
2125	he_50521	8368.35	127.845	1884.5	115.996	0	-2.15076
3716	he_5069	173.413	12.7984	1186.06	61.0789	0	2.77389
3706	he_5069	182.323	23.5056	1103.41	64.5818	0	2.5974
3696	he_5069	231.008	33.1472	1183.13	74.5466	0	2.35659
3267	he_50707	5550.06	104.745	14913.8	169.9	0	1.42607
3277	he_50707	4656.25	152.394	12803.6	285.456	0	1.45931
3257	he_50707	5931.92	141.33	13450.7	333.329	0	1.18111
3842	he_50723	2076.87	97.5144	195.546	21.2514	0	-3.40883
3832	he_50723	2245.92	108.718	156.12	25.6914	0	-3.84658
3822	he_50723	2514.97	163.305	181.33	19.314	0	-3.79385
2146	he_50815	9047.08	131.597	1793.32	70.7161	0	-2.33482
2166	he_50815	7868.35	158.367	1744.61	54.6952	0	-2.17315
2156	he_50815	8230.49	152.498	1851.84	92.7447	0	-2.15202
2177	he_51088	21.6995	7.71859	280	16.2549	0	3.68969
2197	he_51088	10.7498	5.84521	281.283	30.4516	5.21805e-15	4.70964
2187	he_51088	3.86975	5.78632	341.599	49.1443	1.18809e-10	6.46392
3747	he_5126	15686.7	182.486	42524.9	570.612	0	1.43877
3737	he_5126	16759.2	252.974	37237.5	383.72	0	1.15181
3727	he_5126	19294.6	195.444	40155.5	781.418	0	1.0574
821	he_51342	8433.33	158.687	6367.85	225.213	5.27578e-13	-0.405295
831	he_51342	8113.12	154.719	6401.72	188.642	1.70484e-11	-0.341797
811	he_51342	8380.49	225.019	6206.39	257.784	9.89087e-10	-0.433281
3166	he_51344	2578.03	80.4962	1405.21	95.7428	0	-0.875481
3176	he_51344	2420.53	72.1372	1484.48	67.8026	0	-0.705367
3186	he_51344	2080.42	77.8769	1158.04	67.6214	0	-0.845186
2249	he_51356	1643.61	59.9083	6050.56	165.266	0	1.8802
2239	he_51356	1808.63	93.5744	5968.67	140.081	0	1.72251
2259	he_51356	1601.49	64.8081	5484.67	165.282	0	1.77599
3758	he_5138	1176.19	69.6571	620.963	40.7659	1.93066e-10	-0.921548
3768	he_5138	1188.03	62.6781	626.204	53.2451	2.49449e-10	-0.923862
3778	he_5138	1082.24	55.4892	783.625	49.3732	0.000276716	-0.465784
2608	he_51417	828.97	45.064	364.7	30.4037	9.32587e-15	-1.18461
2628	he_51417	680.531	43.3501	299.205	36.4715	1.12131e-09	-1.18553
2618	he_51417	801.214	66.3987	333.047	40.5597	3.07018e-08	-1.26646
1172	he_51418	4653.4	72.1344	2683.41	76.8352	0	-0.794219
1162	he_51418	4861.63	100.008	2869.97	71.2527	0	-0.760406
1152	he_51418	5069.55	79.6586	3049.26	121.463	0	-0.733397
2270	he_51788	36.4245	10.5685	495.379	29.599	0	3.76555
2290	he_51788	17.1497	6.95011	523.055	43.1227	0	4.93071
2280	he_51788	16.0033	9.54353	537.095	63.8803	1.11022e-14	5.06873
2321	he_51830	30.4512	7.10052	213.588	27.9198	1.25536e-08	2.81026
2311	he_51830	33.2633	11.3206	207.689	28.7015	3.00872e-07	2.64242
2301	he_51830	56.5763	10.8117	207.393	24.1087	3.98192e-07	1.8741
2332	he_51888	6845.62	108.213	1370.82	65.9562	0	-2.32014
2352	he_51888	5801.35	138.579	1344.34	99.9866	0	-2.10949
2342	he_51888	6327.18	193.285	1416.16	106.405	0	-2.15958
2363	he_51961	28931.9	234.595	20540.7	239.339	0	-0.494175
2383	he_51961	23791.8	195.945	18268.9	327.275	0	-0.381078
2373	he_51961	25643.9	350.578	20002.6	270.064	0	-0.358432
738	he_51982	128.928	10.0022	45.5898	8.65838	4.51009e-06	-1.49979
718	he_51982	130.789	21.4897	36.2884	14.3424	0.00297169	-1.84966
728	he_51982	100.168	16.955	31.9299	9.56928	0.0068205	-1.64944
1414	he_52022	245.284	22.4	426.561	31.5508	1.19709e-05	0.798298
1424	he_52022	273.899	32.3024	472.093	44.958	0.000492955	0.785425
433	he_52065	16.7817	7.67986	215.229	25.1826	3.15252e-11	3.68091
423	he_52065	20.0275	7.52726	162.478	19.2274	4.37237e-09	3.0202
413	he_52065	29.0934	3.82494	168.523	21.1965	2.75962e-08	2.53418
475	he_52106	5375.9	121.019	4643.76	108.28	2.3532e-05	-0.211214
485	he_52106	5195.8	157.139	4364.39	133.039	0.000149604	-0.251565
2394	he_52245	9536.9	122.856	2152.82	96.7784	0	-2.14729
2414	he_52245	7934.74	110.779	1909.98	83.3528	0	-2.05463
2404	he_52245	8402.91	171.99	2002.8	73.6726	0	-2.06887
2303	he_5226	453.928	32.1462	220.612	21.7423	1.54747e-07	-1.04095
2323	he_5226	337.419	22.6375	232.403	19.7472	0.00381305	-0.537912
2313	he_5226	348.738	33.0053	224.502	23.4587	0.00907693	-0.635414
2435	he_52673	11.9014	14.5091	339.843	37.3465	4.27436e-14	4.83566
2445	he_52673	19.3527	8.42483	316.635	39.7404	1.21457e-11	4.03221
2425	he_52673	51.7127	9.46439	301.158	41.5279	4.22919e-08	2.54193
2476	he_52701	1953.02	55.4216	951.149	57.341	0	-1.03797
2456	he_52701	2515.86	111.406	988.874	77.2468	0	-1.34719
2466	he_52701	2065.69	57.0189	970.191	82.1521	0	-1.09029
2507	he_52722	932.785	40.1479	191.486	19.0758	0	-2.28431
2487	he_52722	849.014	48.1328	141.381	20.9614	0	-2.5862
1518	he_52722	1041.63	59.6363	248.917	24.1287	0	-2.06511
1508	he_52722	1044.76	76.2299	205.631	23.3978	0	-2.34504
1498	he_52722	887.503	74.9231	135.795	22.6708	0	-2.70832
2497	he_52722	915.342	74.5841	170.512	23.5666	0	-2.42443
2642	he_52854	15765.7	206.51	9843.22	164.391	0	-0.679589
2652	he_52854	13752.4	187.428	9621.92	186.909	0	-0.515286
2662	he_52854	12572.5	194.515	8703.01	220.779	0	-0.530679
2693	he_52908	5.28535	6.80715	48.8917	8.34785	0.00226166	3.20952
2704	he_52910	36949.8	219.954	27835.2	305.945	0	-0.408658
2714	he_52910	31766.7	259.26	26139.8	300.253	0	-0.281265
2724	he_52910	29042.3	262.077	23702.1	417.369	0	-0.293142
2735	he_52927	34865.1	258.048	30657.7	460.69	9.99201e-15	-0.185535
2755	he_52927	27468.8	219.154	25778.6	471.925	0.00222606	-0.0916222
2895	he_53034	1596.04	84.1553	1025.1	56.2467	1.55036e-07	-0.638742
2885	he_53034	1719.29	80.767	1210.59	61.3116	3.34453e-06	-0.506104
2905	he_53034	1380.32	48.0609	1036.98	50.8238	8.21016e-06	-0.412606
2981	he_531	1018.6	60.8655	452.454	24.2441	1.9984e-15	-1.17075
3001	he_531	861.644	41.5016	434.209	30.2491	5.71765e-14	-0.988702
2991	he_531	911.939	41.9827	415.771	48.7576	1.62681e-12	-1.13315
2988	he_53109	3956.9	70.0923	2409.16	72.3603	0	-0.715841
2978	he_53109	4260.96	97.9533	2365.89	127.637	0	-0.848798
2998	he_53109	3328.09	94.2696	2138.72	89.2676	0	-0.637949
1462	he_53133	15722.9	197.371	25672.6	255.408	0	0.707361
1472	he_53133	15333.6	209.959	25190.5	314.438	0	0.716177
1482	he_53133	14707	147.725	22773.1	299.015	0	0.630828
2776	he_53189	35314.1	291.968	41014.4	412.759	0	0.215887
2786	he_53189	32510.3	212.303	37577.8	529.135	0	0.208984
2766	he_53189	41446.1	349.894	44661.4	560.928	5.87133e-07	0.107793
781	he_532	212.951	16.2688	68.5897	12.8786	2.19506e-08	-1.63446
791	he_532	238.807	26.0307	74.3712	14.1945	2.89989e-06	-1.68303
801	he_532	234.363	33.4505	90.3072	15.7097	0.000877968	-1.37583
2515	he_53230	2717.76	122.658	1750.83	82.5454	5.97205e-10	-0.63438
2525	he_53230	2561.2	109.034	1800.87	81.8329	1.58237e-07	-0.50813
2535	he_53230	2363.71	117.774	1823.67	117.18	0.00265746	-0.374206
3403	he_53233	182.302	21.6336	29.0142	10.5106	1.60488e-07	-2.6515
3393	he_53233	164.771	24.0876	32.218	5.05003	9.92463e-06	-2.35453
3383	he_53233	140.595	25.4996	25.4926	10.0771	0.000533033	-2.4634
3809	he_5346	2332.62	137.782	3662.54	179.094	2.87318e-09	0.650892
3799	he_5346	2678.46	99.972	3373.73	149.987	8.48054e-05	0.332939
3789	he_5346	2892.23	171.864	3717.38	174.463	0.000512	0.362101
3042	he_53515	254.339	24.6094	60.9329	13.2709	5.58166e-09	-2.06146
3052	he_53515	226.115	18.3624	67.1043	13.3768	1.07592e-08	-1.75258
3062	he_53515	176.706	17.2331	52.1047	11.3807	1.38623e-06	-1.76187
3114	he_53548	253.11	20.8512	88.288	15.1538	1.07403e-07	-1.51947
3104	he_53548	281.974	27.6744	91.0342	16.4347	4.0331e-07	-1.63108
3124	he_53548	213.29	21.3194	83.3156	12.4359	1.56875e-05	-1.35616
1435	he_53549	247.014	23.687	110.714	14.9657	5.08224e-05	-1.15775
1455	he_53549	210.68	17.601	125.94	15.2023	0.00361685	-0.742317
449	he_53589	3739.79	102.647	2892.42	112.022	1.44373e-07	-0.370681
439	he_53589	3789.35	90.7939	3017.67	130.241	4.91421e-06	-0.328512
129	he_53591	361.701	41.4804	173.258	21.4636	0.000415519	-1.06187
139	he_53591	374.259	44.0018	176.944	26.1913	0.000698112	-1.08074
149	he_53591	387.385	45.2433	203.141	22.6332	0.0014116	-0.931288
2972	he_540	1	1.44218	177.337	48.3152	0.000413388	7.47035
2299	he_5626	262.886	23.3848	98.889	15.2332	8.40666e-07	-1.41056
2309	he_5626	209.761	24.6554	94.4336	15.9704	0.00111594	-1.15137
3830	he_5651	8769.14	183.202	12740.8	180.716	0	0.538945
3840	he_5651	8017.29	316.359	14224.7	387.853	0	0.827209
3820	he_5651	9791.63	242.052	14003.4	554.89	1.53522e-12	0.516154
2983	he_593	85.2775	13.5222	10475.9	169.108	0	6.94069
2993	he_593	62.1465	10.0636	9811.4	168.377	0	7.30264
3003	he_593	57.2597	10.0302	8688.93	231.631	0	7.24551
3024	he_596	3.954	5.25685	664.389	39.5428	0	7.39257
3034	he_596	7.57328	7.67132	606.286	39.6604	0	6.32294
3014	he_596	36.2132	8.14993	573.993	45.5938	0	3.98645
3065	he_598	9.99757	5.29585	422.513	24.1828	0	5.40127
3055	he_598	13.5846	4.59087	431.875	30.112	0	4.99057
3045	he_598	42.8137	8.78353	440.925	38.5929	0	3.36439
3861	he_6041	32759.2	369.091	21157.9	310.222	0	-0.630705
3851	he_6041	37335.2	275.043	23485.8	715.594	0	-0.668745
3871	he_6041	30536.1	260.281	23743.7	467.606	0	-0.362968
3477	he_6831	4925.63	141.343	2799.43	140.47	0	-0.815173
3487	he_6831	4259.47	111.697	2714.5	101.115	0	-0.649987
3497	he_6831	3808.16	126.183	2576.68	40.8714	0	-0.563583
522	he_6833	151.676	14.7786	58.5513	9.60114	4.48222e-05	-1.37322
502	he_6833	158.946	21.5461	60.2833	11.7751	0.00113782	-1.3987
512	he_6833	140.992	19.2554	51.1489	13.296	0.0020831	-1.46284
3818	he_6835	365.352	35.6602	113.534	14.3221	1.01788e-08	-1.68617
3838	he_6835	305.33	26.21	132.925	15.3163	1.51835e-06	-1.19975
3828	he_6835	302.708	47.6302	103.043	18.2691	0.000570641	-1.55468
2268	he_6836	4832.66	92.9262	2590.78	129.782	0	-0.899433
2288	he_6836	4072.51	95.9058	2451.69	83.373	0	-0.73214
2278	he_6836	4381.84	115.07	2451.6	109.698	0	-0.837814
2516	he_6841	58.0041	7.67855	12.4198	9.26748	0.00868217	-2.22351
39	he_7041	37114.3	334.614	33183.5	484.593	1.02646e-10	-0.161511
59	he_7041	36341.7	427.148	39116	717.169	0.000520549	0.106136
70	he_7043	9432.65	202.513	7126.72	210.009	2.43139e-14	-0.404425
80	he_7043	9721.99	293.504	7367.83	247.821	3.70249e-09	-0.400011
90	he_7043	9801.84	179.247	8223.99	241.029	5.29981e-07	-0.253214
132	he_7253	2210.05	161.873	751.244	56.8152	4.44089e-16	-1.55672
142	he_7253	2091.73	172.383	732.428	50.78	5.07927e-13	-1.51394
152	he_7253	2350.73	199.907	871.602	84.1349	6.88271e-11	-1.43137
163	he_7363	3895.36	92.5465	445.833	19.3533	0	-3.12718
183	he_7363	3983.03	100.823	564.938	56.7324	0	-2.8177
173	he_7363	3945	152.724	480.052	53.4414	0	-3.03876
3086	he_810	4.1156	3.60734	82.2582	18.7988	0.000474909	4.32099
3096	he_810	1.59641	3.32849	96.2077	26.2562	0.00120838	5.91325
245	he_8209	208.82	17.9742	40.6958	6.5375	2.41251e-12	-2.35931
235	he_8209	157.374	14.3348	31.6458	9.27697	1.1027e-08	-2.31412
225	he_8209	153.779	24.5266	32.2602	11.1795	0.000197179	-2.25303
256	he_8520	20218	227.256	18449.2	196.601	1.70445e-08	-0.132084
380	he_8776	43257.6	351.383	36269.9	558.932	0	-0.254181
390	he_8776	42696.4	330.318	36410.8	586.605	0	-0.229749
400	he_8776	41525	437.515	38846.9	681.575	0.00177395	-0.0961799
421	he_8778	41577.4	234.509	37298	732.424	7.87323e-08	-0.1567
411	he_8778	41918.1	155.174	37994	702.44	1.44948e-07	-0.1418
452	he_8779	17608.3	216.099	10245	161.268	0	-0.78134
462	he_8779	17207.9	207.285	10621.8	239.27	0	-0.69604
442	he_8779	17807.2	214.365	11091.8	285.221	0	-0.682973
1212	he_8861	206.725	19.0141	88.2539	14.7428	6.03167e-05	-1.22798
1222	he_8861	207.967	22.4685	90.4803	14.125	0.000268281	-1.20068
524	he_9047	715.254	39.9027	1356.04	50.541	0	0.922876
504	he_9047	746.839	26.0357	1439.08	78.2674	4.44089e-16	0.946281
514	he_9047	719.247	45.1366	1238.69	57.333	5.79625e-12	0.784259
2164	he_9049	15202.5	172.942	34024	223.687	0	1.16225
2144	he_9049	17976.1	113.433	40989.6	356.766	0	1.18918
2154	he_9049	16410.7	254.522	39243	347.275	0	1.2578
3773	he_9058	226.069	21.822	420.801	31.2597	2.01558e-06	0.896377
3763	he_9058	255.819	23.1265	459.644	43.447	7.16631e-05	0.845392
3753	he_9058	302.691	25.8215	454.112	30.4183	0.000333349	0.5852
1098	he_9059	598.925	30.1484	1607.71	69.2568	0	1.42456
1108	he_9059	650.245	35.5399	1590.31	66.4676	0	1.29026
1088	he_9059	582.236	60.4706	1572.04	101.191	1.11022e-16	1.43296
2381	he_9068	8041.82	125.453	8779.96	141.846	7.05154e-05	0.126693
2371	he_9068	8810.03	109.408	9484.66	182.731	0.00108305	0.106448
566	he_9090	229.036	18.3562	1287.63	52.4079	0	2.49107
586	he_9090	236.171	24.6386	1272.58	62.0374	0	2.42985
576	he_9090	220.681	17.3253	1180.35	81.821	0	2.41918
719	he_9307	239.689	17.87	84.1455	8.89013	4.26671e-10	-1.51021
729	he_9307	199.246	19.7567	78.0778	13.2837	3.39811e-05	-1.35157
739	he_9307	219.026	23.0605	86.6471	16.8766	0.00011286	-1.33788
617	he_9463	145.277	15.2854	15913.4	214.366	0	6.77529
607	he_9463	139.406	15.5952	15303.5	244.787	0	6.77842
597	he_9463	148.065	12.919	17540	381.411	0	6.88827
659	he_9627	31.6076	11.2336	215.275	20.6613	1.36119e-11	2.76784
669	he_9627	18.28	6.54224	177.396	18.7636	1.56534e-11	3.27864
679	he_9627	26.1096	8.11777	197.919	22.9786	7.62688e-10	2.92226
710	he_9634	15612.1	181.013	23850.9	276.266	0	0.611379
690	he_9634	16410.8	257.246	25175	342.015	0	0.617345
700	he_9634	16062.9	206.373	22287.4	305.937	0	0.472499
909	he_9637	50.5667	8.20558	5.61739	4.12384	0.00154476	-3.17022
721	he_9638	106.728	11.9565	21.3904	7.43316	7.61679e-06	-2.3189
741	he_9638	84.6961	10.0565	16.1214	6.76103	6.09266e-05	-2.39332
731	he_9638	88.092	11.4447	22.8774	11.2585	0.00238161	-1.94508
752	he_9646	30538	249.865	36783.4	569.298	0	0.268445
772	he_9646	28689.5	230.018	33568.5	575.003	1.33227e-15	0.226586
762	he_9646	29646.3	352.192	31034.9	255.244	0.000885681	0.0660396
106	he_9720	25.3456	10.1222	3180.81	121.794	0	6.97152
116	he_9720	14.856	7.97448	3933.61	162.707	0	8.04867
96	he_9720	23.8798	9.5528	3043.49	149.298	0	6.99379
783	he_9721	55.7317	5.75405	8540.18	179.817	0	7.25962
793	he_9721	44.5641	8.52552	7635.75	186.057	0	7.42074
803	he_9721	45.4131	14.3337	7936.33	205.168	0	7.44922
814	he_9772	1172.65	38.7617	2345.83	85.3497	0	1.00032
834	he_9772	1101.91	63.4346	2204.35	69.3713	0	1.00035
824	he_9772	1019.46	85.8057	1996.98	92.8257	2.15383e-14	0.970024
865	he_9775	2426.72	53.2035	735.079	52.3989	0	-1.72304
845	he_9775	2545.49	95.8356	722.718	47.4192	0	-1.81644
855	he_9775	2619.99	103.037	655.081	77.8828	0	-1.99982
896	he_9776	4731.61	107.513	5829.34	68.0617	0	0.301001
876	he_9776	4858.06	101.454	5770.72	186.498	1.20606e-05	0.248369
886	he_9776	4950.38	99.7367	5615.59	182.669	0.000985335	0.181898
3127	he_981	29.1511	8.63789	5146.12	76.3557	0	7.46379
3107	he_981	66.2063	8.10726	6301.46	158.42	0	6.57257
3117	he_981	29.6201	13.52	5754.81	155.766	0	7.60205
788	he_9859	3544.8	67.806	4007.32	167.055	0.0076122	0.176932
819	he_9860	675.088	49.3952	211.484	20.5196	3.88578e-15	-1.67453
829	he_9860	615.322	48.705	232.192	29.496	1.12148e-09	-1.40602
809	he_9860	650.583	68.4428	176.522	29.7939	5.21442e-09	-1.88189
907	he_9882	9609.9	103.386	2290.75	106.627	0	-2.0687
927	he_9882	8980.47	132.68	2269.29	73.2015	0	-1.98455
917	he_9882	9452.8	171.399	2120.32	83.5258	0	-2.15646
2345	TU194	1.77355	4.69065	60.4024	16.0776	0.00321181	5.0899
2355	TU194	1	2.42793	82.6079	27.1067	0.0055659	6.36821
3037	TU285	1639.97	80.152	5293.94	103.506	0	1.69067
3027	TU285	1598.74	48.4529	5077.25	183.163	0	1.66711
3017	TU285	1787.17	79.6134	4961.93	220.99	0	1.47322
3172	TU315	1288.66	65.0105	1061.58	43.6659	0.00974349	-0.279666
3254	TU327	1022.46	49.3606	2406.43	98.8035	0	1.23485
3244	TU327	1023.24	62.6105	2332.9	86.0102	0	1.18899
3234	TU327	1207.69	44.2212	2409.78	99.3086	0	0.996657
3461	TU398	18.8161	5.38284	163.887	21.0083	9.34071e-09	3.12266
3471	TU398	22.3296	8.22363	199.974	28.4216	6.55252e-08	3.16278
3451	TU398	33.961	8.27027	172.28	31.9488	0.000108899	2.34281
3533	TU416	40.533	15.4771	325.176	31.3071	1.19571e-13	3.00405
3523	TU416	26.5957	13.2556	301.312	45.8343	5.22585e-08	3.50199
3513	TU416	59.3497	14.7368	273.426	45.8134	2.18043e-05	2.20384
3678	TU448	5.88839	3.65926	78.6555	16.967	0.000430272	3.7396
3688	TU448	6.82253	4.61985	82.5958	21.9837	0.0027641	3.59769
3719	TU452	132.946	15.8317	1158.87	40.4599	0	3.12382
3699	TU452	178.298	15.5795	1187.28	78.8808	0	2.73529
3709	TU452	158.361	20.2638	1080.73	92.7231	0	2.77072
879	TU56	1660.43	61.5023	191.629	19.3571	0	-3.11517
899	TU56	1558.25	54.8009	208.324	25.9956	0	-2.90302
869	TU56	1487.18	57.4274	172.212	19.0201	0	-3.11032
900	TU600	1650.38	47.3322	900.607	63.5471	0	-0.873824
910	TU600	1700.77	67.3549	929.839	49.977	0	-0.871136
930	TU600	1683.97	80.6042	996.671	46.1761	4.95715e-12	-0.756675
3131	TU782	13.5093	8.1614	247.845	38.9489	4.35618e-08	4.19742
3111	TU782	33.0497	9.35064	201.669	35.2439	1.72142e-05	2.60928
3101	TU782	31.8268	7.61334	180.237	43.9966	0.0014021	2.50158
3379	TU79	1225.31	38.65	4475.18	101.43	0	1.8688
3359	TU79	1463.1	53.5872	4671.44	174.826	0	1.67484
3349	TU79	1460.53	74.7525	4047.53	174.666	0	1.47055
1200	xbz_1041	345.263	26.2825	20.7387	4.71584	0	-4.0573
1180	xbz_1041	141.62	9.17843	17.6588	6.00913	1.88738e-15	-3.00357
1190	xbz_1041	217.863	21.6945	18.2811	6.5267	4.61076e-13	-3.57499
1076	xbz_10531	12.2898	5.49283	87.6266	18.4412	0.000775857	2.8339
1066	xbz_10531	18.6838	7.32174	75.1434	12.9701	0.00191972	2.00786
1448	xbz_10964	242.445	16.0045	783.305	38.6977	0	1.69191
1428	xbz_10964	258.137	26.6067	894.509	56.5741	0	1.79296
1438	xbz_10964	272.621	21.8245	821.848	53.0038	0	1.59197
3650	xbz_11018	386.195	27.5403	1785.54	76.3988	0	2.20896
3640	xbz_11018	454.903	44.0128	2022.61	81.4943	0	2.15259
3630	xbz_11018	454.131	32.4486	1787.93	110.337	0	1.97711
1421	xbz_11316	14004.1	176.124	8878.09	97.6255	0	-0.657524
1401	xbz_11316	15243.4	189.802	9278.55	164.527	0	-0.716212
1411	xbz_11316	14686.9	143.051	9533.11	196.342	0	-0.623515
396	xbz_11369	329.412	40.9533	652.461	40.8662	8.34628e-08	0.985999
386	xbz_11369	293.779	24.7069	454.264	53.4831	0.00690313	0.628798
138	xbz_11688	487.478	40.603	71.4511	13.7591	0	-2.77031
148	xbz_11688	562.439	48.335	88.1591	13.3317	0	-2.67351
128	xbz_11688	467.621	54.5413	61.6331	11.6904	4.33423e-11	-2.92356
644	xbz_11720	7954.1	139.286	12789.1	257.573	0	0.685144
634	xbz_11720	8096.78	82.2935	12401.4	255.934	0	0.61508
624	xbz_11720	7973.41	152.889	11718.1	290.216	0	0.555473
1634	xbz_11894	713.591	44.3153	2133.4	44.1381	0	1.57999
1624	xbz_11894	701.87	37.0519	1842.11	83.1897	0	1.39208
1614	xbz_11894	693.231	53.4141	2074.84	98.9387	0	1.5816
737	xbz_1241	387.652	28.4536	48.8251	7.35759	0	-2.98907
727	xbz_1241	423.056	40.715	63.6852	10.2307	2.9865e-14	-2.73182
717	xbz_1241	405.469	49.1538	54.9501	10.8493	4.10229e-10	-2.8834
24	xbz_12548	22970	161.128	4673.6	191.081	0	-2.29714
14	xbz_12548	20510.6	288.282	3273.8	102.355	0	-2.64733
4	xbz_12548	17158	366.096	2417.67	158.319	0	-2.8272
3743	xbz_12775	8746.19	147.304	938.958	48.8175	0	-3.21952
3723	xbz_12775	10403.3	265.677	804.624	44.8573	0	-3.69258
3733	xbz_12775	10020.2	305.432	964.813	62.4651	0	-3.37652
1432	xbz_12781	18548.6	201.947	16524.4	271.373	9.18315e-09	-0.166712
1452	xbz_12781	17269	181.188	15724.9	268.795	5.70018e-06	-0.135129
2298	xbz_13680	1788.16	50.0058	3761.29	85.6178	0	1.07275
2318	xbz_13680	1551.41	68.2377	3541.37	100.461	0	1.19073
2308	xbz_13680	1450.75	71.3037	3163.39	114.787	0	1.12467
706	xbz_13753	17033.1	216.64	28626.4	516.861	0	0.749003
696	xbz_13753	18018.1	215.191	28687.1	560.583	0	0.670957
686	xbz_13753	17701.9	201.373	27580.6	592.307	0	0.63975
1719	xbz_13754	13620.9	184.848	22184.8	262.173	0	0.703744
1729	xbz_13754	13258.4	204.355	21140.1	247.618	0	0.673074
1709	xbz_13754	14573.8	139.054	23900.8	424.384	0	0.713679
1479	xbz_13756	15273.4	138.568	24010.3	294.586	0	0.652628
1469	xbz_13756	16015.3	253	25762.6	328.621	0	0.685827
1459	xbz_13756	16295	213.137	26825.1	577.688	0	0.719151
2110	xbz_13757	738.893	57.6681	177.824	25.164	3.33067e-16	-2.05492
2120	xbz_13757	679.396	56.5277	148.822	22.8211	1.66533e-15	-2.19066
2130	xbz_13757	667.248	52.9711	186.158	29.0866	3.6815e-13	-1.84169
2329	xbz_13760	78.5739	12.4611	18.6421	5.3724	0.00143619	-2.07549
1223	xbz_13761	17673.9	188.645	18494.1	186.184	0.00133491	0.0654457
944	xbz_13762	88.2328	12.1294	19.994	4.75761	0.000162826	-2.14175
954	xbz_13762	63.7348	8.0271	15.3736	5.96053	0.00130434	-2.05163
934	xbz_13762	71.3263	10.8693	13.624	7.96873	0.00207433	-2.38828
1140	xbz_13763	7974.28	136.303	3724.98	84.5762	0	-1.09812
1130	xbz_13763	8379.26	97.8659	4050.91	144.213	0	-1.04858
1120	xbz_13763	8390.18	226.049	3957.93	142.351	0	-1.08396
1035	xbz_13765	8252.38	117.106	6053.34	123.741	0	-0.447078
1045	xbz_13765	7808.69	134.329	5224.8	151.72	0	-0.579705
1025	xbz_13765	8039.77	176.613	5876.17	223.084	2.35367e-13	-0.452277
117	xbz_14021	1337.29	77.016	725.109	51.1989	7.23251e-10	-0.883042
97	xbz_14021	1206.66	102.277	544.162	42.0948	2.12443e-08	-1.14891
107	xbz_14021	1254.05	108.17	580.311	53.7147	1.76347e-07	-1.1117
1715	xbz_14049	22844.4	222.393	15062.1	297.43	0	-0.600912
1725	xbz_14049	21408.2	228.561	16033.8	199.76	0	-0.417046
1735	xbz_14049	20855.7	278.969	16051.2	214.195	0	-0.377762
1911	xbz_14050	194.993	19.0189	105.293	12.8227	0.0017611	-0.88901
1901	xbz_14050	191.538	22.2779	92.9461	19.7882	0.00639723	-1.04317
1746	xbz_14076	18228.2	183.322	16428.8	241.36	1.27054e-08	-0.149941
1483	xbz_14113	209.756	19.463	46.2121	10.4051	1.593e-09	-2.18237
1473	xbz_14113	131.357	9.16135	32.2229	8.74486	1.39245e-08	-2.02733
1463	xbz_14113	123.015	19.5135	38.6522	10.4432	0.00247599	-1.67021
1514	xbz_14128	11621.3	122.011	5617.09	135.964	0	-1.04888
1494	xbz_14128	12609.6	172.787	5978.04	152.688	0	-1.07678
1504	xbz_14128	11970.3	169.812	5939.71	171.112	0	-1.011
1797	xbz_14129	9593	125.011	2438.93	111.996	0	-1.97573
1777	xbz_14129	10524.4	182.981	2205.18	71.3428	0	-2.25477
1787	xbz_14129	9962.02	183.138	2472.38	109.71	0	-2.01054
1808	xbz_14130	3576.63	58.2808	1463.68	54.5755	0	-1.289
1818	xbz_14130	3523.55	75.8979	1703.14	47.2309	0	-1.04883
1828	xbz_14130	3290.21	81.1899	1652.15	116.328	0	-0.993833
1952	xbz_14154	457.581	46.3033	956.137	43.2303	5.01821e-14	1.06319
1942	xbz_14154	478.568	45.5573	919.901	73.9332	5.5932e-07	0.942755
1932	xbz_14154	463.051	39.3939	798.81	52.9587	7.88884e-07	0.786681
1545	xbz_14675	36505	146.873	27991.9	193.031	0	-0.383081
1535	xbz_14675	38593.8	155.29	30857.8	283.92	0	-0.322733
1525	xbz_14675	40161.6	223.357	31386.8	533.439	0	-0.355658
3185	xbz_14983	11592.9	194.009	49293.2	414.259	0	2.08815
3175	xbz_14983	13486	131.833	60642.1	1010.98	0	2.16885
3165	xbz_14983	14738.4	128.635	55258.3	1307.58	0	1.90661
3051	xbz_15227	871.454	47.346	2237.84	91.4109	0	1.36061
3061	xbz_15227	751.101	46.6196	2009.12	125.721	0	1.41948
3041	xbz_15227	921.554	59.7187	2211.59	146.476	5.55112e-16	1.26294
853	xbz_15625	28337.6	311.363	23832.2	409.384	0	-0.249802
843	xbz_15625	28381.5	1006.51	24694	847.994	0.00855676	-0.200792
2038	xbz_15821	276.265	27.3633	85.66	21.2579	2.26673e-06	-1.68936
2028	xbz_15821	223.857	29.5585	58.895	9.86447	7.24589e-06	-1.92636
2018	xbz_15821	223.995	24.8365	56.6404	19.9124	7.96696e-06	-1.98356
894	xbz_15847	30805.9	177.13	37089.8	403.622	0	0.267819
874	xbz_15847	32590.1	246.58	36766.9	686.024	4.6486e-09	0.173976
884	xbz_15847	31941.6	246.116	34090.1	591.367	0.000473875	0.0939145
1014	xbz_16233	21207.7	267.072	15270.7	211.278	0	-0.473826
1004	xbz_16233	22001.7	150.992	17477	271.894	0	-0.332157
994	xbz_16233	21650.9	208.623	16202.3	367.662	0	-0.418226
1625	xbz_16514	1556.35	61.8075	870.543	45.5081	1.11022e-16	-0.838178
1615	xbz_16514	1605.69	61.2455	974.436	43.1794	6.10623e-15	-0.720556
1635	xbz_16514	1494.11	64.2224	892.726	56.8767	7.4705e-11	-0.742994
777	xbz_16624	766.777	61.8448	3236.28	153.552	0	2.07746
787	xbz_16624	874.834	48.5211	4175.64	217.606	0	2.25492
797	xbz_16624	887.251	50.912	4721.25	269.946	0	2.41175
2751	xbz_16788	183.829	18.2989	725.498	51.7099	0	1.9806
2731	xbz_16788	235.672	24.7504	684.381	51.4625	8.09353e-14	1.53802
2741	xbz_16788	200.125	23.5071	644.208	54.4134	8.87734e-13	1.68663
925	xbz_17038	22445.7	314.883	26355.7	606.325	4.90297e-09	0.231676
905	xbz_17038	23378.2	220.75	26072.5	546.929	2.62341e-06	0.157362
915	xbz_17038	23277.7	180.139	25328.4	422.362	4.47999e-06	0.121805
3072	xbz_17152	82.5458	8.28794	28.673	11.1877	0.00526769	-1.5255
3340	xbz_17454	13779	171.74	23137.5	215.933	0	0.747761
3330	xbz_17454	16057.2	182.899	28044.8	452.132	0	0.80451
3320	xbz_17454	17333.8	167.6	25470.1	574.553	0	0.555217
2224	xbz_18521	873.707	46.1087	583.47	29.7686	2.14503e-06	-0.582491
2214	xbz_18521	935.063	84.9933	515.701	27.2034	1.56725e-05	-0.858529
2204	xbz_18521	1021.7	105.917	661.79	31.6695	0.00297942	-0.626522
1946	xbz_19	31457.7	364.442	17265.6	275.265	0	-0.865516
1936	xbz_19	34453	330.103	19154.4	407.993	0	-0.846953
1926	xbz_19	36697.8	580.813	20267.7	392.461	0	-0.856508
1883	xbz_19721	603.894	42.4329	85.6595	14.6929	0	-2.81761
1873	xbz_19721	551.654	46.3938	64.7436	15.4368	0	-3.09095
1863	xbz_19721	675.668	63.071	75.5451	15.4701	0	-3.1609
1739	xbz_20066	664.407	26.6953	198.261	24.3793	0	-1.74466
1759	xbz_20066	566.472	37.2367	198.992	16.9133	1.66533e-15	-1.50929
1749	xbz_20066	598.263	39.9027	195.794	29.3997	2.74669e-13	-1.61144
3144	xbz_20069	465.951	32.2872	222.703	20.9769	3.44156e-08	-1.06506
3134	xbz_20069	500.736	48.8718	200.385	29.4607	2.24737e-06	-1.32128
3154	xbz_20069	401.398	31.7331	181.973	30.0724	1.05992e-05	-1.14131
2896	xbz_20363	664.93	43.3976	362.366	34.3588	9.23327e-07	-0.875755
2886	xbz_20363	746.661	46.0615	434.683	44.0356	9.79047e-06	-0.78049
2906	xbz_20363	578.177	57.4155	336.899	46.2902	0.0034203	-0.779194
2142	xbz_20370	712.182	43.4859	217.583	24.0894	0	-1.71068
2162	xbz_20370	669.719	41.487	249.458	26.4849	1.5099e-14	-1.42476
2152	xbz_20370	621.886	49.1232	183.619	26.1427	8.96394e-13	-1.75993
436	xbz_20511	6796.35	110.346	4828.77	131.172	0	-0.493103
446	xbz_20511	6939.9	133.447	5550.29	165.229	4.12832e-10	-0.322354
456	xbz_20511	6882.95	104.765	5939.62	164.843	5.06901e-06	-0.212657
2111	xbz_21085	9943.08	158.948	5315.92	171.644	0	-0.903373
2121	xbz_21085	9262.07	222.498	4690.55	98.1438	0	-0.981577
2131	xbz_21085	8684.32	195.748	5020.24	143.937	0	-0.790655
1501	xbz_21086	77.7556	8.53509	9.96468	3.35368	1.15612e-06	-2.96405
1491	xbz_21086	90.9977	12.2258	10.8225	4.6527	8.79168e-06	-3.07179
1511	xbz_21086	62.1517	8.43536	10.7648	5.23664	0.000573373	-2.52947
3433	xbz_21087	15635.7	174.741	17117.1	204.781	2.41295e-08	0.130593
3423	xbz_21087	18292.6	213.58	20455.7	475.176	1.85777e-05	0.161242
3413	xbz_21087	19906.8	220.585	18816.7	274.073	0.00376012	-0.0812495
2245	xbz_21088	187.672	17.0704	45.7483	10.0697	1.08526e-08	-2.03643
2235	xbz_21088	236.118	24.3858	64.0451	11.0978	7.96562e-08	-1.88235
2255	xbz_21088	176.469	23.3667	57.7105	10.2625	0.000135204	-1.61251
1149	xbz_2177	509.411	26.3468	278.772	31.9109	1.04179e-06	-0.869745
1159	xbz_2177	517.406	34.3259	277.012	31.8219	5.65704e-06	-0.90135
1169	xbz_2177	496.82	35.3582	264.18	39.1374	9.0903e-05	-0.911204
956	xbz_21862	29277.6	370.534	36629	611.591	0	0.323191
946	xbz_21862	30555	217.831	34520.8	402.879	0	0.176057
936	xbz_21862	31134.6	179.618	37038.4	719.623	6.66134e-16	0.250504
1904	xbz_22723	4710.78	162.327	9389.17	159.418	0	0.99503
1894	xbz_22723	5679.84	154.784	10620.9	260.65	0	0.90298
1914	xbz_22723	4530.66	100.591	9342.79	298.514	0	1.04413
74	xbz_22825	1977.29	100.75	1334.15	92.9806	1.16266e-05	-0.567601
64	xbz_22825	1761.97	129.808	1086.9	94.6887	8.56083e-05	-0.696962
84	xbz_22825	2024.12	107.213	1605.8	101.768	0.00970469	-0.334
2999	xbz_23097	135.157	15.0596	254.283	29.1095	0.00073781	0.911795
2607	xbz_23504	4973.2	124.637	3378.45	161.675	7.04992e-14	-0.557814
2617	xbz_23504	4496.19	137.913	2905.41	181.24	2.20789e-11	-0.629962
2627	xbz_23504	4013.02	137.974	3002.98	107.992	4.69072e-08	-0.418291
529	xbz_23536	5477.43	150.813	4166.18	158.491	1.10246e-08	-0.394776
539	xbz_23536	5800.26	115.999	5039.27	144.887	0.000121268	-0.202904
549	xbz_23536	5698.47	128.341	5038.53	183.53	0.00637791	-0.177574
987	xbz_23915	21273.3	309.481	25017	276.066	0	0.233865
977	xbz_23915	22650.5	214.021	24835.5	349.288	5.27792e-08	0.13286
967	xbz_23915	22848	243.435	25255.5	462.238	2.20318e-06	0.144525
1305	xbz_24446	2217.79	99.0143	3170.81	91.4607	2.31148e-12	0.515726
1325	xbz_24446	2157.53	93.9707	3018.58	118.226	1.15378e-08	0.484489
1315	xbz_24446	2175.2	84.5564	3089.79	144.313	3.93221e-08	0.506358
923	xbz_250	1070.31	59.163	487.294	37.9064	1.95399e-14	-1.13516
913	xbz_250	1106.84	67.7747	529.006	60.3635	3.33438e-09	-1.06509
903	xbz_250	1076.78	83.9228	451.007	59.4732	1.38388e-08	-1.25551
1988	xbz_251	176.81	15.7477	54.4562	11.9683	8.90921e-07	-1.69903
1998	xbz_251	157.284	13.4501	55.4694	15.1462	6.89219e-05	-1.5036
818	xbz_25639	9426.53	116.59	4477.01	156.478	0	-1.07419
828	xbz_25639	9052.97	179.112	4136.68	139.952	0	-1.12992
808	xbz_25639	9138.08	228.582	4077.99	157.463	0	-1.16403
1008	xbz_25897	18042.5	142.332	13032.4	189.932	0	-0.469292
998	xbz_25897	18349.4	233.733	13317.7	230.409	0	-0.462383
1018	xbz_25897	17265.8	218.823	12980.2	237.057	0	-0.411609
1039	xbz_26076	9910.9	118.883	3399.31	105.72	0	-1.54377
1029	xbz_26076	10090.8	170.038	3280.8	105.366	0	-1.62092
1049	xbz_26076	9853.69	189.789	3471.69	153.564	0	-1.50503
653	xbz_26095	7299.7	183.626	3868.57	128.916	0	-0.916038
663	xbz_26095	7736.66	198.77	4734.94	98.4585	0	-0.708364
673	xbz_26095	7913.04	233.58	4781.36	141.138	0	-0.72681
1080	xbz_26118	22815.8	161.724	25312.6	321.782	2.31459e-12	0.14982
1060	xbz_26118	23841.8	185.113	25898.5	381.602	6.91698e-07	0.119374
1070	xbz_26118	23781.6	209.846	25474.1	304.384	2.7527e-06	0.0991846
1122	xbz_26125	21207.5	230.162	19646.6	335.876	0.000283424	-0.110297
1132	xbz_26125	20880.2	190.83	19563.8	292.628	0.000372608	-0.0939496
1142	xbz_26125	19785.5	252.954	18514.4	248.403	0.000727873	-0.0957972
1173	xbz_26127	17896.5	156.582	21347.5	271.172	0	0.254393
1163	xbz_26127	18672.8	257.251	22661.3	271.55	0	0.279291
1153	xbz_26127	18905.1	227.695	22561.3	266.449	0	0.255076
2080	xbz_26372	718.077	62.4888	305.12	21.5924	1.19875e-08	-1.23476
2090	xbz_26372	680.052	58.449	275.467	32.6965	3.55081e-08	-1.30377
2100	xbz_26372	653.331	52.7992	300.555	41.5539	1.84153e-06	-1.12018
2266	xbz_26373	3004.19	55.8029	1827.36	110.736	0	-0.717215
2276	xbz_26373	2773.55	71.9616	1565.54	111.161	0	-0.82508
2286	xbz_26373	2635.58	83.968	1678.84	84.6482	3.44169e-14	-0.650657
1903	xbz_2650	13598.1	141.023	30749	359.471	0	1.17714
1913	xbz_2650	12845.7	151.707	29747.4	440.87	0	1.21147
1893	xbz_2650	14483.6	189.372	33756.1	538.497	0	1.22073
2948	xbz_26952	754.174	51.8235	310.51	24.2833	1.85318e-12	-1.28026
2958	xbz_26952	661.15	52.3828	294.809	36.5024	1.87764e-07	-1.16519
2968	xbz_26952	623.157	61.2864	300.327	33.366	2.74736e-05	-1.05306
301	xbz_27054	7318.32	95.482	13074.4	304.495	0	0.837163
281	xbz_27054	7375.05	127.521	10826.7	163.257	0	0.553864
291	xbz_27054	7310.86	122.475	11271	247.553	0	0.624497
363	xbz_27253	55.5251	12.5022	570.205	49.7865	0	3.36027
353	xbz_27253	55.4915	13.0082	385.724	41.7576	1.98408e-12	2.79723
343	xbz_27253	48.5582	10.0638	285.964	30.1558	1.60157e-11	2.55805
2793	xbz_27255	758.558	48.6475	268.976	41.1337	2.00917e-12	-1.49578
2813	xbz_27255	639.911	56.2867	223.114	20.7512	2.64952e-10	-1.52009
2803	xbz_27255	718.31	79.3268	238.207	32.7301	2.42562e-07	-1.59239
2638	xbz_27256	169.303	18.53	63.8102	8.68566	4.24796e-05	-1.40775
2648	xbz_27256	139.293	13.4045	61.6662	9.22402	0.00030971	-1.17557
3516	xbz_27257	929.892	41.2527	422.694	26.452	0	-1.13745
3506	xbz_27257	989.522	58.4546	345.288	27.1868	0	-1.51893
3526	xbz_27257	814.755	75.9679	293.974	30.1638	3.89946e-09	-1.47068
3619	xbz_27387	1796.17	59.2158	2106.83	61.1184	0.000275097	0.230149
2369	xbz_27398	4041.39	107.46	2289.69	108.313	0	-0.819701
2379	xbz_27398	3643.09	96.2826	2381.55	57.2999	0	-0.613262
2359	xbz_27398	4264.81	123.067	2554.38	98.0126	0	-0.739511
3485	xbz_27400	203.002	21.1922	44.7125	13.0611	1.47583e-07	-2.18275
3475	xbz_27400	188.382	23.9834	29.1715	9.02759	2.5533e-07	-2.69103
3495	xbz_27400	144.643	21.4591	36.0054	10.7587	0.000240236	-2.00621
260	xbz_27642	6459.81	118.155	5511.88	146.133	1.86489e-06	-0.228947
250	xbz_27642	6298.49	225.511	5338.05	191.441	0.00239202	-0.238691
694	xbz_27866	3549.13	77.8826	8711.3	213.776	0	1.29542
704	xbz_27866	3454.23	95.067	8216.2	207.452	0	1.25011
684	xbz_27866	3396.22	131.857	7549.6	261.783	0	1.15247
2772	xbz_28240	7197.61	152.876	5343.42	169.904	6.21725e-15	-0.429756
2762	xbz_28240	8019.06	150.075	5936.51	305.164	4.01172e-09	-0.433817
2782	xbz_28240	6570.97	109.821	5322.25	211.837	6.46194e-07	-0.30407
3392	xbz_28242	2431.8	57.613	1490.9	58.531	0	-0.705845
3382	xbz_28242	2658.94	92.9201	1379.2	68.6103	0	-0.947026
3402	xbz_28242	2053.1	70.8783	1193.97	67.3471	1.11022e-16	-0.782034
3588	xbz_28291	648.681	30.5075	275.293	19.4281	0	-1.23654
3578	xbz_28291	775.033	50.4758	341.986	27.7794	8.55571e-12	-1.18032
3568	xbz_28291	776.204	72.3589	263.945	29.5133	1.46116e-09	-1.5562
105	xbz_28632	13802.2	134.709	40502.8	383.539	0	1.55312
115	xbz_28632	13364.2	216.662	48240.9	604.159	0	1.85189
95	xbz_28632	13500.4	165.029	43333.6	799.741	0	1.68248
1184	xbz_28951	1016.45	50.5183	182.711	20.8955	0	-2.4759
1204	xbz_28951	1200.81	58.9292	258.109	28.8222	0	-2.21796
1194	xbz_28951	1116.64	91.2694	199.287	20.1807	0	-2.48624
942	xbz_29013	15530.1	134.772	26116.1	292.741	0	0.749868
932	xbz_29013	15206.8	226.11	23745.1	227.741	0	0.642916
952	xbz_29013	14947.4	209.302	21965.4	364.468	0	0.55534
1563	xbz_29172	1895.38	59.7221	1063.4	60.5027	0	-0.833798
1573	xbz_29172	1874.02	81.4549	1035.22	70.5883	2.49689e-13	-0.856198
1553	xbz_29172	1948.65	86.2976	1127.08	65.817	1.10412e-12	-0.789879
880	xbz_29174	1738.93	62.1772	1184.95	66.9984	1.86536e-08	-0.553374
870	xbz_29174	1666.31	85.885	1146.1	57.1026	2.89783e-06	-0.539924
890	xbz_29174	1600.29	86.3807	1015.37	87.1373	8.92168e-06	-0.656327
2297	xbz_29215	15814.9	233.047	26066.7	294.209	0	0.720928
2307	xbz_29215	14663.5	135.609	22969.1	323.84	0	0.647467
2317	xbz_29215	13343.4	181.382	22953.5	443.949	0	0.782592
3351	xbz_29278	3076.66	95.8118	1968.14	74.1333	0	-0.644532
3361	xbz_29278	3005.18	110.108	2177.14	75.7899	5.30177e-09	-0.465014
3371	xbz_29278	2568.43	91.087	1875.37	119.619	1.57741e-05	-0.453715
2452	xbz_29314	1723.4	54.4427	1362.13	87.2765	0.00134003	-0.339396
2462	xbz_29314	1584.74	117.111	1216.09	56.3396	0.00981922	-0.382002
1584	xbz_29477	297.062	16.6126	66.0908	12.0808	0	-2.16824
1594	xbz_29477	253.223	18.132	56.2398	8.21682	1.55431e-15	-2.17074
1604	xbz_29477	216.473	18.3205	63.0677	10.3602	3.98364e-09	-1.77922
1542	xbz_29532	3987.77	102.911	3403.28	107.429	0.000257489	-0.228657
1532	xbz_29532	4162.79	109.912	3542.63	159.275	0.002965	-0.23273
2173	xbz_29533	687.741	35.0175	297.835	27.4027	4.88498e-15	-1.20735
2183	xbz_29533	633.012	40.4767	253.587	33.0866	6.12053e-11	-1.31975
2193	xbz_29533	597.76	56.1915	311.809	30.5723	5.71884e-05	-0.938904
1523	xbz_2993	269.266	35.5898	96.1304	12.2003	7.34531e-05	-1.48597
1533	xbz_2993	286.712	39.1094	104.786	15.0423	0.000161447	-1.45216
1543	xbz_2993	252.772	23.4196	115.235	21.9872	0.000305107	-1.13326
2161	xbz_3026	6183.86	124.887	6780.89	135.439	0.00086881	0.132966
1246	xbz_3182	35268.1	173.164	27145.2	339.855	0	-0.377664
1266	xbz_3182	32783.8	206.147	25212.2	319.51	0	-0.378864
1256	xbz_3182	34507.3	200.19	26591.2	435.06	0	-0.375955
572	xbz_3731	5027.82	89.4708	2874.9	77.4252	0	-0.806421
562	xbz_3731	4777.74	151.341	2716.57	96.3389	0	-0.814541
582	xbz_3731	4857.12	121.422	3013.66	120.876	0	-0.688583
1430	xbz_3733	161.724	12.8206	51.6298	9.44841	1.32517e-07	-1.64726
1440	xbz_3733	164.489	20.6146	55.224	15.0865	0.000472963	-1.57463
1450	xbz_3733	140.63	19.8803	49.63	12.9281	0.00204907	-1.50262
820	xbz_3737	4791.7	68.5254	2782.44	131.883	0	-0.784188
830	xbz_3737	4544.64	121.588	2546.79	100.005	0	-0.835488
810	xbz_3737	4729.74	142.053	2727.58	116.035	0	-0.79414
500	xbz_3740	61.2977	8.67326	6.59919	6.06861	0.00045299	-3.21547
520	xbz_3740	67.698	10.5451	12.2096	6.15225	0.0014012	-2.47109
510	xbz_3740	64.8003	8.83756	16.6394	5.9563	0.00226636	-1.9614
1287	xbz_4623	20427.1	178.4	21297.7	264.828	0.00432205	0.0602161
283	xbz_4638	204.502	24.8173	87.8031	10.6041	0.000364582	-1.21977
303	xbz_4638	202.205	18.0277	118.273	12.8714	0.00263244	-0.773692
1314	xbz_4815	200.004	27.1596	85.731	13.4499	0.00170693	-1.22214
1304	xbz_4815	192.487	20.2832	94.9767	16.551	0.00241248	-1.01912
2360	xbz_4920	10132.9	146.931	29851.4	378.833	0	1.55875
2370	xbz_4920	9389.73	179.297	26987.8	417.975	0	1.52315
2380	xbz_4920	8387.66	144.044	25244.2	513.671	0	1.58961
1789	xbz_4929	334.421	17.9926	645.609	37.8187	5.21994e-12	0.948994
1779	xbz_4929	358.942	22.4002	630.647	36.3918	2.88111e-09	0.813083
1769	xbz_4929	376.78	26.5537	693.235	45.8043	1.27107e-08	0.879621
55	xbz_4935	8061.46	274.172	9012.67	246.084	0.0066192	0.160914
2019	xbz_5066	191.976	15.6764	64.0384	12.228	2.99554e-07	-1.58392
2029	xbz_5066	161.81	20.9093	54.9346	14.6542	0.000633092	-1.55851
2039	xbz_5066	168.724	23.4934	73.4402	15.259	0.00537311	-1.20002
1616	xbz_5186	3461.47	101.368	9167.62	213.569	0	1.40516
1636	xbz_5186	3108.52	75.4678	8006.59	234.518	0	1.36496
1626	xbz_5186	3318.17	110.737	8665.08	262.014	0	1.38483
1318	xbz_5246	29469.9	238.678	36658	211.026	0	0.314884
1328	xbz_5246	28200.3	186.372	34931.5	389.278	0	0.308816
1308	xbz_5246	30387.4	221.029	37776.7	431.742	0	0.314024
1882	xbz_5348	3012.65	81.0006	3469.11	123.109	0.00151025	0.203534
1707	xbz_5349	701.04	50.8201	195.526	23.2354	2.22045e-16	-1.84214
1717	xbz_5349	643.225	56.494	208.62	25.6174	1.69111e-10	-1.62445
1727	xbz_5349	644.479	70.7472	197.643	26.3432	5.46752e-08	-1.70524
2143	xbz_5579	27330.7	233.885	23616.2	217.931	0	-0.210742
2153	xbz_5579	25392.3	161.795	22242.1	257.145	0	-0.191095
2163	xbz_5579	22963.8	270.923	20067.4	297.226	3.35332e-12	-0.19451
2050	xbz_6201	428.05	30.469	265.489	26.8234	0.000547694	-0.689126
2060	xbz_6201	399.609	45.0535	218.488	30.0647	0.00334909	-0.871036
314	xbz_6473	1706.42	74.1014	540.97	29.9794	0	-1.65735
334	xbz_6473	1804.63	88.3073	684.233	46.2045	0	-1.39914
324	xbz_6473	1818.21	97.4988	585.62	60.0646	0	-1.63448
1905	xbz_6475	9838.74	187.243	14079.5	305.656	0	0.51705
1895	xbz_6475	10142.9	225.221	14245.9	394.46	0	0.490076
1915	xbz_6475	9276.21	311.337	13680.4	409.365	0	0.560501
2267	xbz_701	1013.95	47.7504	14549.3	188.039	0	3.84289
2277	xbz_701	963.109	58.8061	14016.9	196.589	0	3.86333
2287	xbz_701	975.913	50.7215	14410.5	255.672	0	3.88422
1202	xbz_702	7171.06	115.376	6324.34	91.3764	5.77253e-08	-0.181271
2422	xbz_7110	1276.72	72.7565	519.317	60.7177	7.38298e-14	-1.29775
2442	xbz_7110	1001.43	50.0445	484.342	42.1479	4.15223e-13	-1.04796
2432	xbz_7110	1108.68	46.1772	538.407	58.9005	1.9138e-12	-1.04208
1339	xbz_7200	16326.6	176.832	18546	114.601	0	0.183884
1349	xbz_7200	16265.7	139.546	19058.1	231.45	0	0.228572
1359	xbz_7200	15569.2	160.348	17386	225.862	3.54686e-11	0.159234
1605	xbz_73	24.4078	7.42761	100.117	19.3569	0.0014438	2.03627
1595	xbz_73	34.3798	5.97556	91.9437	13.5144	0.00148141	1.41919
1585	xbz_73	36.9579	6.83015	91.3456	16.413	0.00866363	1.30545
1874	xbz_7517	2656.78	88.1379	2167.29	99.981	0.000688974	-0.293786
1864	xbz_7517	2762.77	97.7863	2262.74	114.812	0.00221387	-0.288044
1562	xbz_7667	1309.24	77.4681	731.299	57.225	2.4071e-08	-0.840191
1552	xbz_7667	1362.15	74.3101	834.867	58.9082	2.53647e-07	-0.706269
1572	xbz_7667	1212.23	59.792	742.05	65.9284	1.0883e-06	-0.708076
231	xbz_8049	2662.41	84.8918	868.169	71.9271	0	-1.61669
241	xbz_8049	2728.59	78.9368	1026.92	75.6601	0	-1.40983
221	xbz_8049	2671.7	169.187	828.924	65.572	0	-1.68845
1378	xbz_8050	16518.5	189.886	28119.3	266.734	0	0.76748
1388	xbz_8050	15615.2	222.138	24429.1	241.399	0	0.645649
1368	xbz_8050	16684.5	296.639	27826.1	1169.09	0	0.73793
3795	xbz_8189	474.156	48.6195	261.271	23.1591	0.000471747	-0.859816
3785	xbz_8189	496.799	57.1165	242.48	45.1896	0.00172956	-1.0348
975	xbz_8207	274.7	26.6336	140.537	12.7494	0.000144295	-0.966902
985	xbz_8207	255.809	27.0342	127.918	22.8145	0.00222242	-0.999851
965	xbz_8207	256.289	24.0385	138.6	28.7005	0.00792539	-0.886846
3315	xbz_8328	789.354	34.9082	1031.83	43.0438	2.41631e-05	0.386459
3305	xbz_8328	827.84	43.5729	1014.44	43.7598	0.00281145	0.293257
1843	xbz_8337	18147.8	247.677	28814.4	370.819	0	0.666993
1853	xbz_8337	16713.6	252.346	26289.6	359.393	0	0.653467
1833	xbz_8337	19060	323.532	31388.2	530.836	0	0.719671
1254	xbz_8338	15782.4	192.597	26507.2	376.005	0	0.74807
1264	xbz_8338	14751	221.182	23190.6	268.005	0	0.652727
1244	xbz_8338	15963.6	140.778	26893	555.921	0	0.752448
2244	xbz_8644	6285.37	185.575	4807.58	179.325	4.5281e-08	-0.386687
2254	xbz_8644	5855.13	124.355	5163.77	134.515	0.000425515	-0.181277
2234	xbz_8644	6748.78	250.125	5525.95	217.401	0.000503182	-0.288405
1417	xbz_8958	2019.34	49.4135	664.128	62.6151	0	-1.60435
1407	xbz_8958	1799.75	67.8805	517.455	58.5589	0	-1.79829
1397	xbz_8958	1771.97	88.1439	479.835	38.4086	0	-1.88474
1006	xbz_9265	3503.9	82.7425	465.873	41.7163	0	-2.91095
1016	xbz_9265	3328.87	107.841	444.008	56.9074	0	-2.90637
996	xbz_9265	3283.39	135.912	441.821	30.8103	0	-2.89365
252	xbz_9343	1618.53	95.8027	660.596	32.3865	0	-1.29284
262	xbz_9343	1543.75	84.3686	744.992	55.8044	1.26454e-13	-1.05114
272	xbz_9343	1563.57	82.1071	855.537	75.2052	2.54964e-09	-0.869939
1419	xbz_9344	241.884	21.5673	100.561	11.6655	2.1646e-06	-1.26625
1409	xbz_9344	272.748	26.2569	94.9399	19.7297	3.80919e-06	-1.52248
1399	xbz_9344	241.479	24.5885	97.8058	19.2337	0.000104521	-1.3039
841	xbz_9572	694.442	52.3182	398.369	40.9758	5.81677e-05	-0.801748
851	xbz_9572	695.65	48.2587	410.727	44.2783	8.9301e-05	-0.760181
861	xbz_9572	675.576	71.8353	358.527	39.2371	0.000438144	-0.914036
1215	xbz_998	39146.3	299.399	31933.9	397.55	0	-0.293789
1225	xbz_998	38204.7	284.781	30604.8	441.607	0	-0.319993
1235	xbz_998	36441.2	175.967	30106.1	477.735	0	-0.275517
321	chr10_C_2	2.87023	1.19198	1	16.579	0.976468
362	chr10_C_2	2.42719	1.54454	1	13.0889	0.977207
3245	chr10_C_2	1	0.246022	1	52.5868	0.866818
3659	chr10_D_4	8.95092	1.9744	1	6.41309	0.541567
3669	chr10_D_4	6.06135	1.38801	1	10.3301	0.815538
3689	chr10_D_4	1	1.53926	2.36847	9.70887	0.755682
734	chr11_A_6	5.07638	2.39874	1	11.8681	0.927169
2842	chr11_A_6	1	0.304586	1	54.25	0.866914
3555	chr11_A_6	1	0.332781	1	76.2495	0.867812
280	chr11_A_7	11.0958	3.15539	1.8689	6.57811	0.527924
920	chr11_A_7	13.3645	4.05039	4.13332	6.60134	0.547209
3028	chr11_A_7	1.5675	1.5565	5.14527	9.53414	0.674942
796	chr12_D_5	8.49255	3.47693	5.527	9.59806	0.96748
3617	chr12_D_5	1	0.656497	5.05229	27.4686	0.747235
2904	chr12_D_5	1	0.352446	3.52766	32.4998	0.795486
982	chr13_D_6	10.5334	3.27859	3.61717	5.14432	0.616691
342	chr13_D_6	3.3141	1.5031	1	18.4633	0.98312
3090	chr13_D_6	1	0.379647	1	43.2466	0.866154
300	chr18_B_3	6.23182	2.74549	6.98257	7.00287	0.820567
403	chr18_B_3	5.95023	3.27468	3.99014	9.13323	0.981184
3400	chr18_B_3	1.22834	1.65312	9.4586	7.25413	0.387891
331	chr2_B_2	7.58761	2.24655	1.80133	7.36051	0.750261
290	chr2_B_2	2.66404	0.752428	1	13.6535	0.984793
3214	chr2_B_2	1	1.32798	3.91743	14.8905	0.718468
434	chr2_D_1	7.39426	2.18572	1.43722	7.33002	0.738041
279	chr2_D_1	2.03313	0.994465	1	17.7589	0.940546
3431	chr2_D_1	1	1.00466	20.72	29.061	0.433144
3628	chr20_B_4	12.7837	3.63255	2.59571	6.27175	0.473015
3638	chr20_B_4	7.41459	2.4681	2.57473	5.36845	0.756617
3658	chr20_B_4	1	0.781134	1	14.1711	0.87448
3597	chr6_A_4	5.3051	1.80178	1	10.68	0.86547
3607	chr6_A_4	4.52536	1.46559	1	11.8871	0.916876
3627	chr6_A_4	1	1.06564	1.50539	10.7073	0.835579
765	chr8_B_5	13.6921	2.46306	3.48548	7.37149	0.495925
3586	chr8_B_5	3.67119	2.02458	4.71265	9.21607	0.811005
2873	chr8_B_5	1.63001	1.72091	1	10.0402	0.942419
951	chr9_B_6	9.64108	3.05852	4.56368	5.61865	0.756171
311	chr9_B_6	6.18199	2.16416	1.66458	6.89396	0.819662
3059	chr9_B_6	1	0.819083	4.9439	35.8393	0.774518
938	he_10021	17.5091	6.06044	9.7854	6.64106	0.676672
948	he_10021	10.4233	5.32574	11.7253	5.21653	0.784075
958	he_10021	9.26742	3.06334	7.95069	5.97111	0.964906
989	he_10106	10.3946	4.45244	29.318	10.2094	0.165183
979	he_10106	7.30896	3.59959	28.2267	13.6601	0.194431
969	he_10106	21.5593	4.24597	26.403	11.7068	0.651098
657	he_10364	17.6669	5.11898	9.43097	4.18475	0.555041
677	he_10364	12.3762	2.99967	11.4829	7.66205	0.92655
667	he_10364	7.65905	4.1817	16.7934	8.68865	0.413492
1745	he_10636	36.6542	6.95713	14.0696	5.53434	0.121932
1755	he_10636	19.5792	7.62377	14.9531	5.76278	0.864969
1765	he_10636	18.3654	5.94384	13.6306	7.94433	0.865687
460	he_11072	31.526	7.17258	22.6853	5.93386	0.627369
450	he_11072	21.0654	5.99976	22.7261	7.36428	0.776714
440	he_11072	30.0047	5.0551	24.5238	9.35953	0.839044
1144	he_11517	15.6318	3.34058	17.5961	7.70118	0.750535
1134	he_11517	12.8637	3.90086	14.5656	5.94116	0.754757
1124	he_11517	21.329	4.14296	17.4359	5.88457	0.861286
2051	he_11553	89.3721	9.39942	58.7689	13.7979	0.195984
2061	he_11553	73.0432	12.1047	52.5083	9.26388	0.375364
2071	he_11553	62.0373	11.3782	69.2208	14.9232	0.635068
3332	he_11555	405.32	42.9537	280.664	29.3828	0.0405171
3342	he_11555	387.105	35.9476	287.28	24.2461	0.0535582
1652	he_11662	17.0433	2.82129	6.28774	4.63756	0.347058
1662	he_11662	6.20921	3.15864	5.11413	5.0927	0.954403
1672	he_11662	2.62879	2.08327	1.11905	10.0776	0.95212
168	he_11733	7.27754	4.87785	6.12527	8.00226	0.936857
178	he_11733	5.22177	3.06421	6.2559	7.68282	0.806029
158	he_11733	7.67588	4.22572	4.06748	10.3799	0.944954
1155	he_11751	40.814	5.51007	12.9995	3.25683	0.0150197
1165	he_11751	34.8393	5.93995	11.2824	6.5164	0.103063
1175	he_11751	31.5003	5.03027	11.4224	5.86806	0.132731
220	he_12051	20.4759	5.05927	12.455	6.35874	0.630345
230	he_12051	19.9349	6.27915	15.1261	6.50234	0.8441
240	he_12051	16.4021	3.77721	11.9084	8.92117	0.874868
688	he_12052	21.7527	5.00586	12.4685	5.51139	0.531358
708	he_12052	16.7794	5.68635	17.3098	7.17288	0.839309
698	he_12052	12.907	3.25183	11.287	6.46447	0.981509
3900	he_12203	7.50633	2.37242	20.3674	11.0046	0.322565
3880	he_12203	19.2018	5.43235	13.2399	3.67109	0.700303
3890	he_12203	4.63512	3.08157	14.9572	9.61208	0.379028
3	he_12335	3.4502	1.44869	1	11.1339	0.965494
13	he_12335	5.69845	3.18122	3.29145	6.49231	0.964057
23	he_12335	1	1.99717	5.38125	7.07028	0.580309
1227	he_12443	7.46727	2.20322	12.3155	5.80888	0.532722
1217	he_12443	14.0126	2.57235	8.82201	4.29412	0.694026
1237	he_12443	8.19689	3.01566	6.83494	4.67549	0.979613
37	he_12546	9.22108	4.34814	7.17923	6.15148	0.992888
57	he_12546	6.75956	3.94149	7.61515	7.43055	0.817609
47	he_12546	1	1.05729	12.9455	32.5921	0.607283
1258	he_12588	10.9702	6.67203	44.5854	10.5307	0.0302859
1248	he_12588	22.6074	3.10391	48.0075	9.84973	0.0577064
2272	he_12763	9.55977	1.44065	4.11391	4.8812	0.677718
2282	he_12763	1	2.58277	6.46718	10.8089	0.587689
2292	he_12763	1	0.566223	1	20.5942	0.873693
2113	he_1289	24.2137	5.92847	12.7954	5.58554	0.451533
2123	he_1289	9.05407	2.61173	13.6582	6.31266	0.564348
2133	he_1289	6.72014	3.4329	12.2876	6.59246	0.523961
2797	he_129	53.9863	14.3829	125	26.2797	0.0253976
3032	he_13009	1	0.643263	35.8497	16.4204	0.0586145
3012	he_13009	11.9069	3.60599	6.83102	5.95379	0.774341
3022	he_13009	1.64598	2.55487	7.84168	8.53436	0.527467
119	he_13117	9.03319	2.88014	16.7973	7.24054	0.421057
99	he_13117	11.6174	4.39428	13.2462	5.91826	0.762074
109	he_13117	4.83656	4.97678	11.5807	9.71887	0.544479
1289	he_13183	343.593	34.3634	284.771	24.72	0.27239
1279	he_13183	330.826	31.8325	270.095	41.6678	0.364564
1299	he_13183	374.801	34.8284	334.125	29.3871	0.514424
1351	he_13758	22721.7	207.476	21813.2	296.087	0.0203522
1361	he_13758	21987.6	178.886	21997	165.165	0.840173
912	he_138	23.2325	6.28579	31.8121	7.77893	0.445685
902	he_138	18.4659	6.46975	18.0029	11.7813	0.890773
922	he_138	10.7371	6.0305	28.3729	14.9673	0.305057
2210	he_13993	11.0156	3.60262	9.61323	6.29006	0.966386
2220	he_13993	2.21388	2.45853	14.8267	8.18656	0.252689
2230	he_13993	1	0.855948	22.692	33.1521	0.442001
2619	he_14115	2436.44	133.077	2276.26	141.705	0.520421
2629	he_14115	2425.46	105.717	2320.54	92.0433	0.573587
354	he_14144	5.44623	1.884	6.83865	10.0259	0.795396
344	he_14144	2.99139	1.38372	1	15.0768	0.989586
364	he_14144	1	1.25252	1	27.5996	0.883497
1475	he_14371	8.30181	5.805	23.192	7.04682	0.203814
1485	he_14371	8.80564	2.49757	20.9407	8.76857	0.286102
1465	he_14371	22.732	3.81512	16.9631	4.3378	0.683164
2602	he_14382	18.3245	8.07189	58.9835	13.7639	0.0300829
2592	he_14382	14.4849	8.32173	51.9086	16.1867	0.0679395
2582	he_14382	37.6993	7.78648	47.7498	12.2296	0.485435
1558	he_14400	19.1158	3.16735	10.5345	3.86076	0.448274
1568	he_14400	10.2083	5.0708	10.5945	6.59203	0.8462
1578	he_14400	7.53727	2.65688	5.60113	7.07793	0.999697
726	he_14422	21.4755	4.59078	12.4019	8.42562	0.624962
716	he_14422	17.6798	5.32081	12.9946	7.26418	0.850628
736	he_14422	11.4807	4.00806	10.7323	9.6789	0.910182
2179	he_14700	15.9688	3.11188	8.64117	5.3483	0.593218
2189	he_14700	1.37549	1.88015	3.38291	8.52832	0.751071
2199	he_14700	1	1.65411	7.51516	8.52333	0.48673
1301	he_15138	13.6012	5.07786	47.6289	10.2131	0.0199286
1291	he_15138	24.1397	6.81162	55.0171	13.2482	0.0766469
1281	he_15138	26.7859	5.17543	47.5149	12.4095	0.183373
1312	he_15155	15.3897	3.51514	8.75717	5.45663	0.652495
1322	he_15155	8.42901	3.88066	8.25627	6.9128	0.881323
1332	he_15155	5.14404	2.66159	7.58735	5.70848	0.693896
1343	he_15187	4.4883	1.31816	1	12.343	0.919424
1353	he_15187	7.88079	2.40085	6.84097	5.04666	0.953412
1363	he_15187	3.08582	2.26781	6.01824	7.68831	0.688287
1384	he_15199	7.8051	5.09238	12.3326	5.66521	0.587288
1394	he_15199	6.7287	2.89605	8.39492	4.27332	0.734471
1374	he_15199	13.3719	2.56899	10.8053	4.90864	0.922734
1405	he_15200	12.0764	3.39138	3.58282	6.5724	0.574265
1415	he_15200	12.3141	2.7543	7.59795	4.33329	0.73717
1425	he_15200	2.49165	0.862247	1	14.4931	0.972303
1456	he_15201	9.29876	4.38757	41.3697	15.0947	0.0777215
1446	he_15201	14.4963	3.73725	30.6597	9.82301	0.209999
1436	he_15201	16.4293	3.839	25.4666	8.94021	0.419785
2805	he_15397	93.6908	24.478	30.0031	12.9952	0.0680068
2815	he_15397	89.9786	15.5076	46.1477	12.1985	0.0970522
3043	he_15616	4.81427	1.36134	1	11.9854	0.899126
3063	he_15616	1	0.945641	29.1429	29.6588	0.307372
3053	he_15616	1	0.55393	11.3418	29.5137	0.618078
1599	he_15624	771.167	43.1222	897.048	37.537	0.0270605
1589	he_15624	847.749	24.839	845.824	14.5421	0.916192
3202	he_15944	13.9486	3.42533	11.1004	8.33144	0.95984
3212	he_15944	1.85084	2.24851	13.9629	7.51091	0.246166
3222	he_15944	1	0.500805	26.4952	38.5366	0.434447
2671	he_15980	8.9778	4.84978	5.76956	6.93032	0.930093
2691	he_15980	1	0.778098	37.3034	23.6815	0.134887
2681	he_15980	1	1.00917	6.69652	33.8127	0.734658
127	he_16205	10.6353	4.77851	11.3462	4.85691	0.820209
137	he_16205	15.4118	4.91652	10.6454	9.82417	0.882277
147	he_16205	5.99223	3.78494	5.35925	6.93574	0.911147
3959	he_16206	1	2.20937	18.0487	6.81449	0.0944039
3949	he_16206	7.81066	2.06628	12.5488	6.17901	0.547955
3939	he_16206	14.2748	3.05475	11.4854	4.57741	0.903964
898	he_16289	7.15074	2.32328	1.82154	7.10934	0.773053
878	he_16289	13.0878	3.61498	7.78664	9.27116	0.835109
888	he_16289	14.4838	5.51353	11.7216	10.2497	0.992242
1651	he_16347	28.0328	8.4665	53.929	11.1164	0.114275
2086	he_1662	12.9094	4.30022	3.22929	4.94787	0.467245
2096	he_1662	1.14809	1.46692	1	11.4639	0.915889
2106	he_1662	1	0.634554	9.51767	16.2655	0.531641
1713	he_16687	20.9384	5.87514	9.79921	4.01546	0.417414
1733	he_16687	5.81848	2.7278	8.89544	5.10919	0.63993
1723	he_16687	8.15606	3.94447	10.0169	4.552	0.731321
1754	he_16726	17002.6	254.003	15347.7	555.201	0.0114723
3229	he_16732	8.87346	2.44028	1	6.40744	0.586631
3239	he_16732	1.34146	2.72476	2.14882	9.7825	0.826502
3249	he_16732	1	0.543542	17.9712	18.3169	0.338527
826	he_16903	9.25322	2.16062	4.73474	5.64323	0.785025
816	he_16903	5.33615	0.911494	1	11.3623	0.863213
836	he_16903	7.23805	3.81753	5.2634	9.22375	0.979812
3663	he_17153	9540.25	193.643	9006.76	211.328	0.0948697
254	he_17154	45.0797	8.90775	11.8967	4.50831	0.0310015
274	he_17154	35.9996	7.23163	14.0945	5.98011	0.151158
264	he_17154	28.3468	4.33998	8.66719	7.77509	0.185132
323	he_17193	11.2898	5.03533	7.43007	5.27065	0.865668
313	he_17193	9.66412	4.08795	7.74286	9.09826	0.976895
333	he_17193	3.88312	4.27136	11.3139	9.23285	0.49889
3667	he_17301	11.548	2.4132	4.20519	3.6308	0.494662
3677	he_17301	1.83743	2.59323	8.48618	11.5622	0.565508
3687	he_17301	1	2.38623	8.26132	5.8063	0.388498
1806	he_17423	14.5745	3.47534	10.502	4.89182	0.817058
1816	he_17423	3.53948	4.00557	13.1186	6.94157	0.347096
1826	he_17423	3.5998	2.06462	4.97648	6.14821	0.77117
850	he_17443	9.09043	3.71529	5.44871	4.02069	0.834804
840	he_17443	6.12602	1.97249	1.82682	10.0836	0.895584
860	he_17443	4.36467	3.49006	2.79338	7.59621	0.968536
161	he_17857	546.408	63.5945	349.409	38.1435	0.0189255
1033	he_17916	9.22768	2.3284	2.0652	6.68267	0.641747
1043	he_17916	6.12886	2.79103	3.42632	7.03053	0.948915
1053	he_17916	2.51084	1.47885	1	10.3601	0.998506
2540	he_18076	25.0685	7.67228	60.4903	13.9849	0.0559929
2530	he_18076	18.6625	10.3289	47.5242	14.1212	0.137123
2520	he_18076	38.2831	12.0565	40.9718	14.672	0.780427
1868	he_18129	43.0166	6.1868	65.9157	15.1253	0.20342
509	he_18321	10.1938	3.87313	2.84574	4.31043	0.573228
499	he_18321	6.16009	2.54081	1.53425	7.75765	0.8358
519	he_18321	3.15146	1.99237	1	8.56058	0.98612
3291	he_18422	12.8537	2.72816	5.79284	4.64241	0.572462
3311	he_18422	1	1.33971	9.09316	6.27968	0.318165
3301	he_18422	1	1.85879	1	13.4622	0.873328
2489	he_18466	4.62633	1.60661	1	18.2042	0.969179
2509	he_18466	1	0.74371	1	17.6442	0.870705
2499	he_18466	1	0.534272	1	83.6873	0.868014
2454	he_18518	13.6522	3.82507	6.40419	4.45245	0.583602
2474	he_18518	1	2.37222	16.8207	10.3194	0.208524
2464	he_18518	1	0.324092	1	79.1417	0.867895
398	he_18545	8.63466	4.74137	10.6062	5.0971	0.735202
378	he_18545	11.9041	3.38478	10.6831	5.27301	0.961704
388	he_18545	4.65383	4.10128	5.1702	7.85093	0.839451
44	he_18658	5.8667	3.39048	5.57481	6.19822	0.890435
34	he_18658	4.53068	2.50466	2.50179	7.21658	0.99497
54	he_18658	2.08977	1.7623	1	8.79048	0.947284
3729	he_18859	14.5302	3.34986	4.87601	2.71625	0.339393
3739	he_18859	1	0.701649	24.5485	16.1328	0.172912
3749	he_18859	1	0.722895	13.1263	18.4353	0.45934
1981	he_18955	57.1103	13.1935	77.0088	12.7931	0.29824
1971	he_18955	47.4776	9.02538	56.9996	8.62072	0.465226
1961	he_18955	74.9934	10.8482	68.5626	17.3965	0.923747
1992	he_19075	46.5575	8.49772	20.1074	6.52845	0.110462
2002	he_19075	22.6192	6.32041	18.7813	5.93189	0.894845
2012	he_19075	17.0595	4.73022	15.8229	5.8387	0.953044
1962	he_1916	10.138	2.37065	3.43613	4.74037	0.593684
1982	he_1916	1.81338	1.65801	2.33207	10.1119	0.84225
1972	he_1916	1.28613	1.39583	1	19.4564	0.910383
3608	he_19342	2.60464	0.851997	1	12.5338	0.982995
3598	he_19342	3.33245	1.15879	1	17.883	0.986862
3618	he_19342	1	0.593729	26.727	19.3759	0.196704
189	he_19849	12.2573	3.14513	15.223	10.4584	0.720321
199	he_19849	10.3979	4.25842	11.0721	7.3279	0.828905
209	he_19849	5.23064	3.63779	8.93105	9.82467	0.679208
385	he_19909	8.81283	3.98985	3.41839	4.1253	0.709106
375	he_19909	3.8793	1.0442	1	12.4662	0.949475
395	he_19909	4.48099	2.73406	3.91702	6.28317	0.910106
3660	he_19925	10.1717	2.99493	2.09215	6.07811	0.572087
3670	he_19925	6.1699	2.68103	2.66903	8.32773	0.916731
3680	he_19925	1.65291	2.94535	5.28938	9.17332	0.671524
3698	he_19980	12.1316	3.47774	5.67722	3.47555	0.592215
3718	he_19980	1.834	2.73516	7.82855	6.77018	0.496914
3708	he_19980	1	1.21982	1.38776	20.5317	0.830104
2095	he_20008	14444.8	179.278	14168.9	346.427	0.591854
2105	he_20008	13436.7	194.773	13428.6	266.702	0.889315
2126	he_20127	6.64992	4.64782	13.1136	4.85187	0.453784
2116	he_20127	16.6383	3.95114	11.664	5.10514	0.765413
2136	he_20127	3.41882	2.08532	10.2426	10.713	0.540916
2167	he_20131	12.5947	6.49621	43.1565	10.808	0.04896
2147	he_20131	22.4746	3.85168	48.1776	11.5843	0.0856412
2065	he_20265	16.2021	4.62061	18.4925	9.08799	0.748035
2075	he_20265	14.5944	2.90786	10.5965	6.62617	0.855067
2055	he_20265	24.1615	8.69115	18.9899	7.36912	0.868346
3931	he_20337	3.1567	2.4705	14.3896	5.14128	0.199011
3911	he_20337	15.6597	3.85909	8.73792	6.68519	0.680556
3921	he_20337	2.2642	2.06021	8.7813	6.90146	0.465898
3714	he_20374	6.8962	4.16908	18.5083	8.04005	0.30221
3694	he_20374	22.0254	3.90135	14.4473	4.75971	0.575259
3704	he_20374	4.67122	2.3958	8.71526	6.29247	0.596538
2148	he_20375	9.56346	2.49924	5.00208	4.95626	0.765039
2158	he_20375	2.28712	2.29813	3.05048	7.39223	0.82065
2168	he_20375	1.20271	1.93882	2.09979	9.20299	0.819042
1026	he_20459	11.0014	3.08583	14.9934	11.3934	0.681044
1036	he_20459	15.2717	3.78393	15.3632	8.56001	0.864941
1046	he_20459	4.22392	2.58016	17.8575	10.7035	0.29237
2271	he_20697	81.2711	15.315	30.4548	7.87326	0.0280844
2281	he_20697	58.9649	10.0534	26.8304	7.96269	0.0870305
2291	he_20697	52.8503	9.35369	27.8058	10.8507	0.237994
3577	he_20910	8.0826	2.75878	3.01819	4.68248	0.721874
3567	he_20910	5.59278	2.08787	1	12.9906	0.87823
3587	he_20910	1	0.322755	1	63.9953	0.867383
2426	he_20922	12.3253	5.20536	12.4891	6.14704	0.85979
2446	he_20922	1	1.33528	9.94776	12.8928	0.46309
2436	he_20922	1	0.822023	22.7517	23.7662	0.330495
2488	he_20942	22.3526	4.02091	8.61907	8.00393	0.383625
2508	he_20942	8.10504	3.89382	8.86937	9.22071	0.828401
2498	he_20942	3.74201	3.10986	3.67812	7.84611	0.874148
2560	he_21059	1	2.29646	2540.94	236.407	0
2334	he_21097	11.0728	3.55727	5.59417	6.65831	0.765459
2344	he_21097	1	2.95132	7.8143	9.26584	0.477039
2354	he_21097	1	1.25804	3.5333	14.4481	0.72657
1119	he_21132	22.5309	5.4888	12.7014	5.48377	0.515301
1129	he_21132	16.2292	3.64067	17.3056	4.53737	0.787454
1139	he_21132	16.8356	4.22376	15.8875	5.76274	0.935697
429	he_21320	8.64445	4.70575	12.897	5.57527	0.59638
419	he_21320	7.98357	3.4213	12.0426	9.35306	0.654349
409	he_21320	10.3152	2.80725	9.96086	5.93375	0.895908
2458	he_21337	7.55705	2.42726	3.5889	5.30886	0.820116
2468	he_21337	1	3.25345	6.04672	10.6045	0.592594
2478	he_21337	1	0.578359	12.8214	26.7959	0.565031
3745	he_21527	1	0.595141	36.7762	17.9977	0.0701842
3725	he_21527	12.0181	2.3901	9.78259	6.96273	0.977642
3735	he_21527	1	1.29423	3.14683	6.16318	0.711105
2622	he_21871	1	2.99258	1864.72	208.62	0
664	he_21987	13.9767	4.93224	8.5324	8.89652	0.831831
654	he_21987	8.21286	3.11009	4.96169	7.94517	0.928579
674	he_21987	2.1813	1.27651	1	17.5957	0.946409
2767	he_22155	10.414	4.26442	10.2119	5.66939	0.884171
2787	he_22155	1	1.20331	44.9142	33.3339	0.175225
2777	he_22155	1	0.844851	37.3034	25.9333	0.162721
3167	he_22366	12.6106	3.89788	10.1078	5.89035	0.954915
3187	he_22366	1	0.58782	40.0465	20.8981	0.079937
3177	he_22366	1	1.02546	22.3843	16.6293	0.218544
3797	he_22493	2.00334	2.20061	25.4648	11.5035	0.103713
3807	he_22493	3.13788	2.36244	24.8797	10.5489	0.109442
3787	he_22493	17.7424	5.23327	23.8229	6.36117	0.517148
2829	he_22545	14.0469	3.2075	7.97028	6.10679	0.705095
2839	he_22545	1.50792	3.62424	9.74632	7.714	0.420795
2849	he_22545	1	1.43162	1	18.5949	0.898195
3109	he_22736	11.9208	2.42363	4.20463	5.49592	0.559177
3129	he_22736	1	0.504875	1	24.239	0.870358
3119	he_22736	1	0.700092	7.71498	28.8448	0.692131
1947	he_22761	4.09821	2.26978	13.1167	5.24521	0.288062
1927	he_22761	15.9326	4.91873	9.88114	5.51447	0.723676
1937	he_22761	3.00553	2.26843	7.39187	5.73346	0.560672
2733	he_22762	12.9873	4.37023	3.78991	8.85747	0.627962
2753	he_22762	1	1.73424	10.8382	6.60569	0.287841
2743	he_22762	1	0.74816	5.49459	32.9275	0.755896
1064	he_22798	10.2245	3.53013	4.81456	4.07831	0.69379
1074	he_22798	10.0575	3.51864	12.0352	5.92165	0.733932
1084	he_22798	6.1058	2.58122	4.36366	7.76368	0.980847
1807	he_22897	13.5496	3.23771	6.83479	7.69158	0.713682
1817	he_22897	1.67966	2.94824	5.5942	5.01972	0.582647
1827	he_22897	1.65698	1.53092	1	15.2493	0.934078
3962	he_23031	7.05322	2.42231	28.3277	8.74336	0.0797194
3952	he_23031	6.75854	4.01406	18.8708	7.06547	0.255603
3942	he_23031	23.4879	8.05311	17.0149	4.8045	0.757104
1869	he_23198	11.6579	4.05447	5.53708	6.00362	0.714338
1879	he_23198	2.39571	3.04272	5.55546	8.2842	0.686335
1889	he_23198	1.1232	1.10803	1	13.0942	0.917617
2950	he_23268	15.8299	5.23022	5.38066	8.50461	0.570527
2970	he_23268	1.30398	2.8772	9.21723	9.61516	0.474776
2960	he_23268	1	0.350788	1	43.4386	0.86617
533	he_23269	16.0355	4.07369	8.29369	4.94073	0.576315
553	he_23269	11.4313	5.38818	8.50312	7.53531	0.958354
543	he_23269	8.6425	3.74229	7.06416	8.6831	0.961084
2932	he_23347	1537.29	88.8874	1846.79	88.0041	0.0106113
2922	he_23347	1873.13	97.0438	1823.14	106.011	0.861662
316	he_23414	10.0889	4.46185	4.76551	5.44646	0.760126
336	he_23414	7.49691	2.46151	7.91127	7.92195	0.844412
326	he_23414	2.53931	2.90974	4.84507	8.63044	0.737505
2984	he_23428	17867.3	196.723	17032	290.983	0.0288175
2485	he_23458	237.036	23.9764	330.222	39.7197	0.0453966
2495	he_23458	161.528	25.0752	263.01	58.0398	0.0957309
1776	he_23832	11.9271	4.09098	4.99016	4.32744	0.608686
1796	he_23832	1.47462	1.49133	4.65546	8.67963	0.684905
1786	he_23832	1.35772	1.49784	1.17422	10.6483	0.8798
3056	he_23954	28.2912	6.43092	33.1874	14.9708	0.688451
3066	he_23954	33.0378	9.26286	36.0281	14.6153	0.762875
1002	he_23994	20.1403	4.93299	8.07204	5.65515	0.391155
1022	he_23994	10.2018	2.85851	1.01508	3.84627	0.39802
1012	he_23994	14.3145	3.92774	5.67683	6.25793	0.565599
3877	he_24	20.0407	4.81792	10.2213	3.45525	0.426601
3897	he_24	10.4417	4.21041	14.4064	6.03181	0.614925
3887	he_24	13.9633	2.2967	7.67907	5.47044	0.652915
3077	he_24113	111.558	14.304	59.5826	11.7283	0.0344463
3097	he_24113	105.125	19.0303	65.8131	16.6687	0.244412
3087	he_24113	85.9679	17.4458	52.1491	13.3531	0.261368
3118	he_24277	2.83907	4.77169	37.3341	13.0271	0.0394209
3108	he_24277	15.8291	5.93591	35.9725	9.62781	0.146392
3128	he_24277	1	1.36461	148.351	37.9652	0.000242584
3846	he_24664	11.5936	2.82585	4.22356	4.92759	0.566087
3856	he_24664	9.17972	2.93368	2.87261	7.68326	0.734215
3866	he_24664	2.35929	2.89759	9.13689	6.83323	0.458834
212	he_24677	122.609	12.8992	65.2645	10.7607	0.0106981
202	he_24677	105.629	20.7689	46.2637	11.1548	0.049412
3180	he_24706	1	2.49954	19.61	5.4164	0.0448449
3190	he_24706	1	3.02283	14.0384	5.5894	0.160996
3170	he_24706	16.851	4.53352	13.35	4.09027	0.863037
1848	he_24741	5.24616	2.84514	21.0834	6.36997	0.117398
1838	he_24741	17.5173	6.01188	17.7334	5.98902	0.856933
1858	he_24741	2.92504	3.45455	20.7962	14.1784	0.267657
3211	he_24757	1	0.942616	73.6941	31.2812	0.0255671
3201	he_24757	12.767	4.22916	21.0489	8.34083	0.441705
3221	he_24757	1	1.27931	47.9319	26.71	0.0878768
3233	he_24920	4.61681	1.32938	1	12.4807	0.921229
3243	he_24920	1	1.13012	35.2761	22.2331	0.136065
3253	he_24920	1	0.191701	1	40.2772	0.865884
3574	he_2498	4.19166	1.27468	1	14.3011	0.953994
3584	he_2498	1	1.37784	3.17076	8.99359	0.704287
3594	he_2498	1	0.394201	4.82258	34.97	0.774781
3835	he_25	3.105	2.73477	14.9986	6.58578	0.229223
3825	he_25	7.66897	3.21641	3.13803	4.54846	0.768105
3815	he_25	13.5832	4.29209	10.0856	6.17359	0.894896
3324	he_2502	14.6807	2.5866	7.07747	4.11299	0.505886
3344	he_2502	1.37179	1.89318	9.8579	5.99885	0.335326
3334	he_2502	1	2.44137	5.82907	6.82885	0.550864
3125	he_25082	7.16772	4.19474	17.1217	6.77754	0.330301
3105	he_25082	23.7292	6.99912	12.258	8.01896	0.546264
3115	he_25082	8.26774	4.34387	9.83451	7.18182	0.774364
2877	he_25098	57.8243	10.9805	21.9084	6.61389	0.053281
2867	he_25098	49.748	15.2565	15.0871	7.98309	0.148156
[truncated: 1,949 more rows]

## Sheet: 差异数据
		Sample A			Sample B			log2(Sample B/Sample A)
No.	探针_ID	信号中值	重复探针点间标准偏差	重复探针点间变异系数	信号中值	重复探针点间标准偏差	重复探针点间变异系数	中值	重复探针点间标准偏差	重复探针点间变异系数
1	he_28473	63.1377	23.402	0.370651	27785.4	1542.33	0.0555086	8.78161	0.573756	0.0653361
2	he_28474	202.074	9.30395	0.0460424	40714	2269.21	0.0557353	7.62968	0.021737	0.00284901
3	he_31029	41.3718	11.1657	0.269886	7978.22	598.47	0.075013	7.59128	0.24002	0.0316179
4	he_28476	69.7231	4.22306	0.0605689	13217.5	783.789	0.0592994	7.54451	0.16162	0.0214222
5	he_981	29.6201	21.2598	0.717747	5754.81	577.945	0.100428	7.46379	0.55875	0.0748614
6	he_9721	45.4131	6.21702	0.136899	7936.33	460.608	0.0580379	7.42074	0.102239	0.0137774
7	he_360	1	0	0	161.285	17.2449	0.106922	7.32933	0.154551	0.0210866
8	he_593	62.1465	14.9662	0.240821	9811.4	903.198	0.092056	7.24551	0.194591	0.0268567
9	he_31030	176.835	24.954	0.141115	29537.6	2091.39	0.0708041	7.23854	0.160707	0.0222016
10	he_31032	157.369	36.5788	0.232439	23406	2700.83	0.115391	7.03839	0.229391	0.0325914
11	he_9720	23.8798	5.68051	0.237879	3180.81	479.215	0.150658	6.99379	0.615562	0.0880155
12	he_28482	153.267	19.0094	0.124028	20645.1	1609.62	0.0779659	6.96037	0.09096	0.0130683
13	he_21873	32.6428	20.5455	0.629406	3950.13	141.116	0.0357244	6.91884	0.594938	0.0859882
14	he_9463	145.277	4.41978	0.0304232	15913.4	1156.09	0.0726493	6.77842	0.0643428	0.0094923
15	he_31031	81.3616	17.2785	0.212367	7908.26	527.014	0.066641	6.49904	0.201651	0.0310278
16	he_21871	10.7956	12.1689	1.12721	574.617	106.661	0.185621	6.44916	2.49425	0.386756
17	he_596	7.57328	17.673	2.33359	606.286	45.8079	0.0755551	6.32294	1.74189	0.275487
18	he_37889	20.9791	18.7908	0.89569	1662.54	5.47658	0.00329411	6.30059	0.789344	0.125281
19	he_38204	6.00286	12.8905	2.14739	451.48	37.5677	0.0832102	6.23287	1.46601	0.235207
20	he_25588	4.9412	18.2764	3.69878	362.748	31.0811	0.0856823	6.19796	2.2156	0.357473
21	he_22404	2.77344	10.4215	3.7576	202.487	17.3507	0.085688	6.19001	2.08113	0.336207
22	he_31033	9.16942	13.0436	1.42251	663.284	30.3384	0.0457397	6.17665	1.29976	0.210432
23	he_14386	80.8423	18.9337	0.234205	5777.79	189.305	0.0327643	6.15129	0.421933	0.0685926
24	he_2937	19.5232	17.1528	0.878585	1447.6	43.4359	0.0300054	6.14597	0.758711	0.123449
25	he_28480	173.367	8.58204	0.0495022	12404.1	792.219	0.0638677	6.11517	0.0401741	0.00656958
26	he_25586	7.66572	14.139	1.84445	503.019	22.7543	0.0452355	6.0912	1.3717	0.225193
27	he_37892	10.188	16.4866	1.61824	632.963	92.3594	0.145916	5.95718	1.56211	0.262223
28	he_17441	75.911	15.5354	0.204654	4554.65	155.447	0.0341293	5.95524	0.257347	0.0432135
29	he_46744	111.596	15.3385	0.137447	6974.62	168.529	0.0241632	5.9355	0.203013	0.0342032
30	he_16349	36.9326	14.1158	0.382204	2224.1	77.0444	0.0346408	5.93287	0.524353	0.0883811
31	TU194	1.38677	0.546981	0.394427	71.5052	15.7017	0.219588	5.72905	0.903903	0.157775
32	he_34734	1.52881	0.747852	0.489172	73.4934	16.9065	0.230041	5.65971	1.07094	0.189221
33	he_14393	22.7631	12.0545	0.529563	983.777	49.7787	0.0505996	5.53027	0.616515	0.11148
34	he_21059	20.0924	10.8351	0.539264	852.471	11.1877	0.0131238	5.52021	0.800442	0.145002
35	he_10552	13.7992	10.2387	0.741975	600.572	80.9646	0.134813	5.44368	0.921557	0.169289
36	he_17407	38.7289	8.47273	0.21877	1679.99	126.52	0.0753097	5.4389	0.394222	0.0724819
37	he_21872	9.04822	13.5307	1.4954	372.659	31.4673	0.0844399	5.36408	1.62486	0.302915
38	he_32353	40.9503	14.4572	0.353041	1539.97	51.1491	0.0332144	5.21612	0.660662	0.126658
39	he_35269	17.9272	19.752	1.10179	640.234	11.2842	0.0176251	5.15838	0.928813	0.180059
40	he_21594	197.966	29.2936	0.147973	7593.47	371.587	0.048935	5.13993	0.234299	0.0455841
41	he_810	2.856	1.78133	0.623715	89.2329	9.86374	0.110539	5.11712	1.1259	0.220026
42	he_36649	3.39309	17.1268	5.04755	116.334	9.65919	0.0830295	5.1115	2.31772	0.453433
43	he_598	13.5846	18.0005	1.32507	431.875	9.20645	0.0213174	4.99057	1.07719	0.215845
44	he_31383	20.417	14.9996	0.734665	644.784	18.8856	0.0292898	4.98098	0.721189	0.144789
45	he_51788	17.1497	11.4736	0.669024	523.055	21.2258	0.0405805	4.93071	0.715881	0.145188
46	he_25712	2438.59	34.852	0.0142919	85.6963	20.0098	0.233497	-4.85337	0.326582	0.0672899
47	he_51088	10.7498	8.99196	0.83648	281.283	35.1995	0.125139	4.70964	1.40322	0.297945
48	he_31018	169.157	41.6323	0.246116	4321.6	311.229	0.0720169	4.66139	0.205501	0.0440858
49	he_42318	28.3324	4.49797	0.158757	677.953	86.0895	0.126984	4.45754	0.389747	0.0874354
50	he_28483	20.7012	11.0254	0.532599	422.095	6.92974	0.0164175	4.36876	0.638561	0.146165
51	he_4625	4.2442	2.00664	0.472796	81.9141	11.1567	0.1362	4.34932	0.906471	0.208417
52	he_11415	17.3999	11.4411	0.657539	312.025	29.4697	0.0944466	4.24985	0.692318	0.162904
53	he_42311	24.3905	6.22997	0.255426	409.821	12.3885	0.0302292	4.10456	0.356808	0.0869297
54	he_2066	344.739	152.348	0.441924	20.5189	5.20903	0.253865	-4.07048	0.278386	0.0683914
55	he_52673	19.3527	21.1645	1.09362	316.635	19.4707	0.0614926	4.03221	1.16388	0.288645
56	xbz_701	975.913	26.4443	0.027097	14410.5	276.138	0.0191623	3.86333	0.0206687	0.00534996
57	he_50723	2245.92	220.945	0.0983763	181.33	19.967	0.110114	-3.79385	0.238973	0.0629896
58	he_1492	1296.12	78.5672	0.060617	17253.3	878.405	0.0509122	3.76396	0.0964903	0.0256353
59	he_40976	34.5071	4.94433	0.143284	461.64	12.4737	0.0270205	3.7418	0.154554	0.0413047
60	he_25728	10620.6	957.565	0.0901612	815.718	165.461	0.20284	-3.73214	0.207744	0.0556635
61	he_36553	29.0264	18.6759	0.643411	346.731	18.6911	0.0539066	3.67223	0.679229	0.184964
62	TU448	6.35546	0.660542	0.103933	80.6256	2.78625	0.0345578	3.66865	0.100348	0.0273529
63	he_365	132.954	27.9857	0.210491	1795.71	147.676	0.0822383	3.65576	0.163341	0.0446805
64	he_41344	24.2557	12.8677	0.530503	301.716	22.2676	0.0738031	3.6368	0.755255	0.20767
65	xbz_1041	217.863	102.887	0.472255	18.2811	1.62855	0.0890836	-3.57499	0.527492	0.147551
66	he_11413	22.9114	12.7873	0.558118	243.793	13.7437	0.0563743	3.41069	0.789773	0.231558
67	he_39736	5190.31	33.3144	0.00641857	499.782	42.0478	0.0841322	-3.39195	0.121798	0.0359079
68	xbz_12775	10020.2	867.55	0.0865802	938.958	85.9985	0.0915893	-3.37652	0.240946	0.0713593
69	he_16347	6.73128	1.02023	0.151566	62.3708	10.8316	0.173664	3.20929	0.471322	0.146862
70	he_40142	5682.1	121.986	0.0214684	50843.7	1539.28	0.0302747	3.18224	0.049632	0.0155966
71	TU398	22.3296	7.92676	0.354988	172.28	18.8844	0.109614	3.12266	0.462265	0.148036
72	TU56	1558.25	87.0901	0.0558897	191.629	18.0734	0.0943144	-3.11032	0.121107	0.0389371
73	he_36543	1288.89	117.495	0.0911603	150.671	2.4124	0.0160111	-3.0987	0.108004	0.0348547
74	xbz_19721	603.894	62.2631	0.103103	75.5451	10.4598	0.138458	-3.09095	0.181412	0.0586914
75	he_36788	766.76	105.195	0.137194	6465.65	259.796	0.0401809	3.07595	0.127216	0.0413582
76	he_7363	3945	43.9658	0.0111447	480.052	61.3225	0.127741	-3.03876	0.159406	0.0524577
77	he_52065	20.0275	6.38101	0.318613	168.523	28.8695	0.171309	3.0202	0.57558	0.190577
78	TU416	40.533	16.4374	0.405532	301.312	25.9011	0.0859611	3.00405	0.654917	0.218011
79	xbz_21086	77.7556	14.4391	0.185698	10.7648	0.479492	0.0445425	-2.96405	0.287106	0.0968628
80	he_27218	6269.92	324.929	0.0518234	807.074	17.0823	0.0211657	-2.95098	0.0670261	0.0227132
81	he_28969	4780.36	337.236	0.070546	628.291	32.9697	0.0524753	-2.92762	0.171167	0.0584662
82	he_15588	5218.64	200.38	0.038397	694.53	35.473	0.0510748	-2.92693	0.125363	0.0428307
83	he_9627	26.1096	6.6977	0.256523	197.919	18.9612	0.095803	2.92226	0.261971	0.0896467
84	xbz_9265	3328.87	116.427	0.0349749	444.008	13.3001	0.0299545	-2.90637	0.00896488	0.00308456
85	xbz_1241	405.469	17.702	0.0436581	54.9501	7.46815	0.135908	-2.8834	0.129306	0.0448449
86	he_23413	4472.77	614.556	0.137399	642.832	44.8885	0.0698293	-2.8034	0.095924	0.0342171
87	xbz_27253	55.4915	4.01268	0.0723116	385.724	144.21	0.373868	2.79723	0.411862	0.147239
88	TU452	158.361	22.7314	0.143542	1158.87	55.173	0.0476092	2.77072	0.214818	0.0775313
89	xbz_11688	487.478	50.0064	0.102582	71.4511	13.4113	0.187699	-2.77031	0.126082	0.045512
90	he_17291	3130.58	96.091	0.0306943	460.818	54.6126	0.118512	-2.76331	0.214006	0.0774453
91	he_28479	10.5788	3.05075	0.288383	70.1123	10.0083	0.142746	2.75174	0.628607	0.22844
92	he_38408	62.5707	19.9899	0.319477	12.1179	1.92339	0.158723	-2.72741	0.307572	0.11277
93	he_46242	15879	374.689	0.0235965	2453.26	200.134	0.0815789	-2.69435	0.155441	0.0576916
94	he_44379	1391.69	367.781	0.264271	202.935	54.6602	0.269348	-2.66619	0.094485	0.0354382
95	he_37871	4535.85	164.626	0.0362943	759.55	100.444	0.132242	-2.6604	0.202118	0.075973
96	he_29648	8686.02	803.236	0.0924745	1378.98	71.2016	0.0516336	-2.6551	0.0587947	0.0221441
97	he_2348	6035.28	694.514	0.115076	960.093	26.8549	0.0279712	-2.65217	0.126029	0.047519
98	xbz_12548	20510.6	2917.38	0.142237	3273.8	1138.83	0.347863	-2.64733	0.26955	0.101819
99	he_51830	33.2633	14.3406	0.431125	207.689	3.49439	0.0168251	2.64242	0.499147	0.188898
100	he_25776	9327.75	1034.13	0.110866	1651.06	99.3703	0.0601857	-2.63706	0.180134	0.0683086
101	TU782	31.8268	10.9457	0.343916	201.669	34.5505	0.171323	2.60928	0.94953	0.363906
102	he_5069	182.323	31.0023	0.170041	1183.13	46.8935	0.0396352	2.5974	0.209476	0.0806481
103	he_24979	1086.59	172.96	0.159176	6532.16	366.672	0.0561333	2.58775	0.142405	0.0550303
104	he_30566	8820.35	784.498	0.0889418	1477.28	32.642	0.0220961	-2.58426	0.0953387	0.0368921
105	he_2174	4711.07	290.142	0.0615873	808.679	113.929	0.140883	-2.57874	0.166591	0.0646016
106	he_41264	24.7515	6.03383	0.243776	142.408	6.88085	0.0483179	2.52444	0.306084	0.121248
107	he_20180	1083.89	90.0859	0.0831134	192.585	14.7442	0.0765593	-2.52438	0.046297	0.01834
108	he_49840	245.329	7.14075	0.0291068	44.9503	4.14043	0.0921113	-2.50608	0.148454	0.0592375
109	he_46034	6323.97	167.156	0.0264321	1116.05	59.9402	0.0537075	-2.50298	0.109771	0.0438561
110	he_197	449.097	91.8148	0.204443	79.2685	9.31536	0.117517	-2.50221	0.101403	0.0405255
111	he_35232	793.228	6.23884	0.00786514	4403.3	224.606	0.0510086	2.48998	0.0666126	0.0267523
112	he_19454	2025.46	162.357	0.0801581	11362.3	790.638	0.0695845	2.48793	0.0155051	0.00623213
113	he_46408	7189.6	101.58	0.0141288	1292.08	70.6477	0.0546773	-2.47874	0.0964085	0.0388942
114	he_25674	448.014	45.3219	0.101162	80.4359	0.851932	0.0105914	-2.47763	0.125343	0.0505897
115	xbz_28951	1116.64	92.2966	0.082656	199.287	39.6227	0.198822	-2.4759	0.151997	0.0613907
116	xbz_3740	64.8003	3.20489	0.0494579	12.2096	5.03165	0.412105	-2.47109	0.630686	0.255226
117	he_53233	164.771	20.9414	0.127094	29.0142	3.36398	0.115943	-2.4634	0.150239	0.0609886
118	he_41210	7572.29	2076.94	0.274282	1355.42	590.779	0.435863	-2.43199	0.19248	0.0791452
119	he_9090	229.036	7.75268	0.0338491	1272.58	58.081	0.0456405	2.42985	0.0387946	0.0159658
120	he_129	21.7804	6.2988	0.289196	114.699	0.800225	0.00697672	2.42755	0.413122	0.170181
121	he_26104	1131.71	62.619	0.0553312	229.647	11.655	0.0507517	-2.42089	0.0923104	0.0381308
122	xbz_10531	15.4868	4.52117	0.291937	81.385	8.82695	0.108459	2.42088	0.584098	0.241275
123	he_33649	3201.79	232.284	0.0725482	579.014	30.5398	0.0527444	-2.41291	0.0527858	0.0218765
124	he_35693	299.749	31.9576	0.106615	58.2502	0.836966	0.0143685	-2.39714	0.148909	0.0621193
125	he_35178	4574.56	436.168	0.0953464	889.07	66.5928	0.0749016	-2.3961	0.0976205	0.0407414
126	he_52722	924.063	81.0403	0.0877	180.999	42.5265	0.234954	-2.38474	0.227532	0.0954116
127	he_37851	6424.15	681.588	0.106098	1300.22	43.5252	0.0334752	-2.3814	0.153664	0.0645267
128	he_20416	241.138	22.2287	0.0921824	1196.26	115.778	0.0967837	2.36831	0.109015	0.046031
129	he_3702	32.6991	21.2229	0.649036	177.52	10.266	0.0578301	2.36595	0.618142	0.261266
130	he_4967	5627.31	514.885	0.0914976	1102.94	30.0417	0.0272379	-2.35109	0.173988	0.0740029
131	he_21880	42.8446	24.8333	0.579613	217.088	5.09415	0.0234658	2.34109	0.572677	0.244619
132	he_9638	88.092	11.8617	0.134651	21.3904	3.55005	0.165964	-2.3189	0.240203	0.103585
133	he_8209	157.374	30.7926	0.195664	32.2602	5.057	0.156757	-2.31412	0.0533358	0.023048
134	he_19455	779.529	47.4449	0.0608636	3662.27	133.244	0.036383	2.3052	0.110255	0.0478288
135	he_27876	1308.23	141.712	0.108324	6340.04	567.181	0.0894601	2.28627	0.060337	0.026391
136	he_20915	3430.01	307.287	0.0895878	702.717	20.835	0.0296492	-2.28041	0.110012	0.048242
137	he_44807	1407.49	130.261	0.0925481	6641.83	180.347	0.0271532	2.27742	0.11599	0.0509305
138	xbz_16624	874.834	66.2626	0.0757431	4175.64	751.133	0.179885	2.25492	0.167254	0.074173
139	he_30153	713.56	39.092	0.0547844	3369.34	293.692	0.0871659	2.23842	0.180072	0.0804463
140	he_40174	579.531	16.2234	0.027994	2658.44	156.833	0.0589944	2.19762	0.0523537	0.0238229
141	xbz_27400	188.382	30.3662	0.161195	36.0054	7.78929	0.216337	-2.18275	0.355548	0.16289
142	he_25733	202.144	47.1145	0.233074	41.5971	10.9387	0.262968	-2.17725	0.106206	0.04878
143	he_50815	8230.49	603.791	0.0733602	1793.32	53.6876	0.0299376	-2.17315	0.0999987	0.0460155
144	he_47535	106.052	0.777115	0.00732767	23.2568	2.69813	0.116015	-2.17066	0.151579	0.0698308
145	xbz_29477	253.223	40.3462	0.159331	63.0677	5.04648	0.0800168	-2.16824	0.22533	0.103923
146	he_51888	6327.18	522.138	0.0825231	1370.82	36.3192	0.0264945	-2.15958	0.110051	0.0509593
147	xbz_11018	454.131	39.4478	0.0868645	1787.93	136.192	0.076173	2.15259	0.120918	0.0561731
148	he_50521	8368.35	666.947	0.0796987	1873.23	52.6319	0.0280969	-2.15076	0.0871242	0.0405085
149	xbz_13762	71.3263	12.5407	0.175822	15.3736	3.29106	0.214072	-2.14175	0.17428	0.0813727
150	he_40953	2815	35.543	0.0126263	12515.1	623.215	0.049797	2.13565	0.0637259	0.0298391
151	he_21018	438.478	10.4029	0.0237249	1905.44	187.495	0.0983994	2.13451	0.110108	0.0515847
152	he_2031	8530.95	241.446	0.0283023	1933.67	163.555	0.0845828	-2.13382	0.0925872	0.0433903
153	he_23737	1372.53	79.7024	0.0580696	317.662	31.3587	0.0987173	-2.13145	0.077061	0.0361542
154	he_41259	7524.98	232.719	0.0309262	1666.22	138.203	0.0829435	-2.1282	0.0978342	0.0459705
155	he_29964	8887.36	621.307	0.069909	2039.8	102.309	0.0501563	-2.12333	0.0272694	0.0128428
156	he_41333	2992.64	127.305	0.0425394	13035	1113.49	0.0854226	2.12291	0.0589996	0.0277919
157	he_36597	228.456	14.9404	0.0653973	936.246	93.2524	0.0996024	2.1153	0.0890504	0.0420982
158	xbz_14983	13486	1583.64	0.117428	55258.3	5676.94	0.102735	2.08815	0.134316	0.0643229
159	he_26137	4386.22	632.442	0.144188	1055.04	97.2983	0.0922226	-2.08349	0.0858474	0.0412036
160	he_28961	9735.63	209.861	0.0215559	2267.07	268.724	0.118534	-2.08103	0.1328	0.0638144
161	he_21566	7199.89	879.321	0.12213	1712.82	27.9188	0.0162999	-2.0716	0.141259	0.0681881
162	he_52245	8402.91	823.815	0.0980392	2002.8	122.54	0.0611841	-2.06887	0.0498989	0.024119
163	he_9882	9452.8	327.604	0.0346569	2269.29	92.8258	0.0409052	-2.0687	0.0859627	0.0415539
164	xbz_13757	679.396	38.342	0.0564355	177.824	19.5982	0.110211	-2.05492	0.175912	0.0856053
165	he_20870	102.11	15.1061	0.147939	27.3511	3.67545	0.13438	-2.03794	0.0899977	0.0441612
166	xbz_14113	131.357	47.854	0.364306	38.6522	7.00217	0.181159	-2.02733	0.262639	0.129549
167	he_13856	9294.29	381.322	0.0410276	2301.37	73.81	0.0320722	-2.01385	0.104331	0.0518067
168	xbz_14129	9962.02	469.058	0.0470847	2438.93	145.573	0.0596873	-2.01054	0.152056	0.0756295
169	he_46082	184.202	2.51149	0.0136345	46.8948	6.25115	0.133302	-1.97379	0.190475	0.0965026
170	he_24730	121.068	5.679	0.0469074	445.012	67.8445	0.152456	1.95776	0.167021	0.0853122
171	he_33647	8528.98	965.285	0.113177	2353.75	259.975	0.110451	-1.94826	0.0585158	0.0300348
172	xbz_15821	223.995	30.2182	0.134906	58.895	16.143	0.274098	-1.92636	0.155989	0.0809758
173	he_33220	981.158	7.65316	0.00780013	3630.24	119.167	0.0328261	1.88751	0.0586333	0.0310639
174	xbz_21088	187.672	31.7031	0.168928	57.7105	9.29151	0.161002	-1.88235	0.214576	0.113993
175	he_27079	20.1874	9.48914	0.470052	75.239	7.95438	0.105722	1.8418	0.396635	0.215352
176	he_25084	682.966	109.471	0.160287	190.651	10.7811	0.0565487	-1.84088	0.160512	0.0871934
177	he_16755	1887.6	164.161	0.0869682	534.703	66.3701	0.124125	-1.81975	0.0489834	0.0269177
178	he_9775	2545.49	97.4783	0.0382945	722.718	43.0643	0.0595866	-1.81644	0.140807	0.0775181
179	he_37062	733.416	17.5097	0.0238742	208.45	28.1883	0.135228	-1.8117	0.173563	0.0958011
180	xbz_8958	1799.75	135.514	0.0752959	517.455	97.3753	0.188181	-1.79829	0.143588	0.0798468
181	he_28825	284.598	33.8483	0.118934	77.9499	12.7212	0.163197	-1.79682	0.0696596	0.0387683
182	he_33125	822.128	126.879	0.15433	220.607	57.4507	0.260421	-1.79367	0.135176	0.0753628
183	he_51356	1643.61	109.477	0.0666077	5968.67	305.826	0.0512386	1.77599	0.0801913	0.045153
184	he_53515	226.115	39.2951	0.173783	60.9329	7.53894	0.123725	-1.76187	0.175711	0.0997298
185	he_18129	27.1166	3.23699	0.119373	92.089	17.5683	0.190775	1.75576	0.104289	0.059398
186	he_21878	304.018	11.329	0.0372643	1026.5	139.666	0.13606	1.7555	0.248005	0.141273
187	he_22725	6647.62	821.756	0.123617	22379.3	1040.36	0.0464874	1.75126	0.105983	0.060518
188	he_38410	219.072	31.6971	0.144688	65.4025	0.336201	0.0051405	-1.74399	0.181424	0.104028
189	he_20271	216.59	23.8316	0.110031	718.073	35.4346	0.0493468	1.71857	0.0912781	0.0531129
190	xbz_20370	669.719	45.1749	0.0674535	217.583	32.925	0.151322	-1.71068	0.180979	0.105794
191	he_38587	10041.4	199.262	0.0198441	31839.8	1562.76	0.0490819	1.7081	0.0563532	0.0329918
192	xbz_5349	644.479	33.0236	0.0512408	197.643	7.02869	0.0355625	-1.70524	0.110043	0.0645327
193	he_38779	221.733	28.6599	0.129254	58.4347	9.58542	0.164036	-1.70196	0.201146	0.118185
194	he_50065	5229.64	424.482	0.0811685	1572.92	32.9321	0.020937	-1.70098	0.106867	0.0628269
195	he_11793	3540.86	136.006	0.0384106	11643.3	114.582	0.00984096	1.69327	0.0581342	0.0343324
196	xbz_10964	258.137	15.0919	0.0584648	821.848	56.4673	0.0687077	1.69191	0.100493	0.0593958
197	he_12202	1407.7	30.2278	0.0214732	451.1	21.2158	0.0470312	-1.68733	0.0635646	0.0376717
198	xbz_16788	200.125	26.5101	0.132468	684.381	40.6464	0.0593915	1.68663	0.225235	0.133542
199	xbz_28632	13500.4	224.167	0.0166044	43333.6	3915.22	0.0903507	1.68248	0.149829	0.0890522
200	TU79	1460.53	136.554	0.0934964	4475.18	319.027	0.0712882	1.67484	0.199151	0.118907
201	he_9860	650.583	30.044	0.0461801	211.484	28.1378	0.13305	-1.67453	0.238587	0.14248
202	he_36376	598.722	50.4964	0.0843402	189.549	10.3457	0.0545805	-1.67293	0.0395498	0.023641
203	he_44968	26.2824	10.6964	0.40698	83.6929	10.8917	0.130139	1.67101	0.432779	0.258993
204	TU285	1639.97	99.056	0.0604012	5077.25	168.563	0.0331996	1.66711	0.119325	0.0715758
205	he_32	747.536	30.9022	0.0413388	2440.95	108.179	0.0443185	1.66639	0.112845	0.0677183
206	he_51982	128.928	17.1669	0.133151	36.2884	6.97738	0.192276	-1.64944	0.175545	0.106427
207	he_11181	3285.6	53.1198	0.0161674	10415.1	696.178	0.0668431	1.64628	0.110592	0.0671768
208	he_10229	2535.35	139.352	0.0549638	808.503	104.689	0.129485	-1.64212	0.10127	0.0616706
209	xbz_6473	1804.63	61.0016	0.0338029	585.62	73.3055	0.125176	-1.63448	0.142934	0.0874493
210	he_532	234.363	13.8247	0.0589882	74.3712	11.2475	0.151234	-1.63446	0.165134	0.101033
211	xbz_8049	2671.7	35.8267	0.0134097	868.169	104.837	0.120756	-1.61669	0.144664	0.0894815
212	xbz_20066	598.263	49.9617	0.0835113	198.261	1.67596	0.00845326	-1.61144	0.118027	0.0732433
213	xbz_251	167.047	13.8069	0.0826533	54.9628	0.716477	0.0130357	-1.60132	0.138187	0.0862956
214	xbz_11894	701.87	10.2189	0.0145595	2074.84	154.081	0.0742614	1.57999	0.108954	0.0689586
215	xbz_3733	161.724	13.0506	0.0806965	51.6298	2.83458	0.0549021	-1.57463	0.0723226	0.04593
216	he_47496	9868.37	284.458	0.0288252	3314.4	179.544	0.0541707	-1.57406	0.116672	0.0741219
217	xbz_4920	9389.73	875.829	0.0932752	26987.8	2326.17	0.0861934	1.55875	0.0332589	0.0213369
218	xbz_5066	168.724	15.8036	0.0936659	64.0384	9.25321	0.144495	-1.55851	0.214686	0.137751
219	he_24403	1597.78	151.856	0.0950417	538.134	42.7454	0.0794327	-1.55498	0.0405346	0.0260676
220	he_6835	305.33	35.4349	0.116054	113.534	15.1604	0.133532	-1.55468	0.251613	0.161843
221	he_30405	249.338	4.37221	0.0175353	729.363	122.165	0.167496	1.54854	0.23474	0.151588
222	xbz_26076	9910.9	123.712	0.0124824	3399.31	96.3691	0.0283496	-1.54377	0.058995	0.0382148
223	he_27875	210.418	3.30943	0.0157279	609.956	22.5109	0.0369058	1.54024	0.0297972	0.0193458
224	he_25747	12768.8	1391.17	0.10895	4218.34	328.904	0.0779701	-1.53732	0.132368	0.0861033
225	he_34254	2647.78	326.921	0.12347	934.685	90.8181	0.0971644	-1.53148	0.0394928	0.0257873
226	xbz_27255	718.31	60.3367	0.0839982	238.207	23.3735	0.0981225	-1.52009	0.0502502	0.0330573
227	he_53548	253.11	34.4873	0.136254	88.288	3.91244	0.0443145	-1.51947	0.13827	0.0909983
228	he_35559	1732.75	180.218	0.104007	4961.17	129.093	0.0260206	1.51762	0.173557	0.114362
229	he_40162	9625.38	160.682	0.0166935	26919.6	1232.12	0.0457705	1.51581	0.0672794	0.0443851
230	he_7253	2210.05	129.658	0.0586676	751.244	75.5085	0.100511	-1.51394	0.0637226	0.0420906
231	he_4723	2656.82	212.112	0.0798368	7850.4	255.94	0.0326021	1.50963	0.105244	0.0697153
232	he_49594	796.945	27.9328	0.0350499	278.048	27.7484	0.099797	-1.49668	0.144792	0.0967422
233	he_1011	647.273	43.9529	0.0679047	1871.52	142.168	0.0759638	1.49563	0.0694015	0.0464027
234	he_31221	195.612	9.70748	0.0496262	74.3382	6.66854	0.0897054	-1.49552	0.10593	0.0708315
235	he_20181	222.476	44.9313	0.20196	83.0197	3.08134	0.0371158	-1.48511	0.216746	0.145946
236	xbz_27257	929.892	88.8404	0.0955384	345.288	64.7993	0.187668	-1.47068	0.207726	0.141245
237	he_15140	2361.3	225.317	0.0954209	855.947	48.0783	0.0561697	-1.46398	0.0576851	0.0394028
238	he_25704	57.2563	19.2197	0.335678	162.088	9.23055	0.0569476	1.46184	0.498534	0.341032
239	xbz_2993	269.266	16.9722	0.0630315	104.786	9.56634	0.0912943	-1.45216	0.194614	0.134017
240	he_17478	235.212	36.3473	0.15453	87.291	10.2934	0.117921	-1.43006	0.0521922	0.0364966
241	he_50707	5550.06	654.735	0.117969	13450.7	1081.08	0.0803729	1.42607	0.151933	0.106539
242	he_9059	598.925	35.4436	0.0591786	1590.31	17.8387	0.0112171	1.42456	0.0800747	0.0562102
243	xbz_73	34.3798	6.62814	0.192791	91.9437	4.90047	0.0532986	1.41919	0.393238	0.277087
244	he_24981	1598.98	80.0504	0.0500633	4178.32	174.923	0.0418644	1.40614	0.0610079	0.0433869
245	he_6833	151.676	9.0305	0.059538	58.5513	4.85168	0.0828621	-1.3987	0.0461796	0.033016
246	he_25688	142.943	30.0266	0.210061	59.1567	6.60746	0.111694	-1.39585	0.164381	0.117764
247	xbz_5186	3318.17	177.508	0.0534957	8665.08	582.26	0.0671961	1.38483	0.0201035	0.014517
248	he_36556	1381.48	149.211	0.108008	536.273	16.6694	0.0310839	-1.38282	0.114718	0.0829592
249	he_444	9866.85	935.238	0.0947858	25168.8	353.151	0.0140313	1.36355	0.122712	0.0899943
250	xbz_15227	871.454	87.6061	0.100529	2211.59	125.164	0.0565949	1.36061	0.0790679	0.0581121
251	he_9307	219.026	20.2229	0.0923309	84.1455	4.40661	0.0523689	-1.35157	0.0957852	0.0708696
252	he_1012	3515.55	426.16	0.121221	1397.66	130.176	0.0931386	-1.34402	0.0470559	0.0350112
253	he_4064	2313.37	221.221	0.095627	6206.59	369.018	0.0594559	1.33104	0.0967568	0.0726926
254	he_10527	13867.8	413.661	0.0298289	5565.31	81.8368	0.0147048	-1.32633	0.0442072	0.0333305
255	he_36383	439.601	51.9263	0.118121	183.12	12.6575	0.0691216	-1.31881	0.0697201	0.0528659
256	xbz_9344	241.884	17.9372	0.0741564	97.8058	2.81069	0.0287375	-1.3039	0.138353	0.106107
257	xbz_27256	154.298	21.2207	0.137531	62.7382	1.51603	0.0241643	-1.29166	0.164179	0.127107
258	he_25748	3279.57	572.667	0.174616	1317.71	172.216	0.130694	-1.28406	0.125003	0.0973502
259	he_5626	236.324	37.5654	0.158958	96.6613	3.15041	0.0325922	-1.28097	0.183272	0.143073
260	he_25699	6442.63	710.653	0.110305	2924.19	165.196	0.0564931	-1.25623	0.147405	0.117339
261	he_49596	940.442	109.017	0.115921	376.457	30.8345	0.0819071	-1.25473	0.088189	0.0702851
262	xbz_27866	3454.23	77.1953	0.0223481	8216.2	582.954	0.0709517	1.25011	0.0730532	0.0584375
263	xbz_28291	775.033	73.2894	0.094563	275.293	42.165	0.153164	-1.23654	0.202743	0.163959
264	xbz_26372	680.052	32.5371	0.047845	300.555	15.9664	0.0531231	-1.23476	0.0927292	0.0750988
265	he_48075	766.267	13.1812	0.0172018	329.602	12.1987	0.0370104	-1.21585	0.0311373	0.0256096
266	he_8861	207.346	0.877778	0.0042334	89.3671	1.57429	0.017616	-1.21433	0.0193083	0.0159004
267	he_20936	2839.46	190.114	0.0669545	1226.09	99.3402	0.0810222	-1.21156	0.217316	0.179369
268	xbz_2650	13598.1	819.811	0.0602889	30749	2086.25	0.0678477	1.21147	0.0229659	0.018957
269	xbz_29533	633.012	45.3403	0.0716262	297.835	30.3947	0.102052	-1.20735	0.195681	0.162074
270	he_9049	16410.7	1390.64	0.0847401	39243	3624.19	0.0923525	1.18918	0.0492687	0.0414309
271	TU327	1023.24	106.719	0.104295	2406.43	43.451	0.0180562	1.18899	0.12638	0.106292
272	he_51417	801.214	78.9185	0.0984986	333.047	32.7535	0.0983451	-1.18553	0.0469948	0.0396405
273	he_48015	1526.16	70.6889	0.0463182	685.077	74.3494	0.108527	-1.17357	0.206987	0.176373
274	he_38904	17625.4	361.306	0.0204992	7854.07	276.093	0.0351528	-1.16644	0.0764789	0.0655658
275	xbz_26952	661.15	67.4071	0.101954	300.327	7.96487	0.0265207	-1.16519	0.113601	0.0974954
276	he_1586	6592.96	168.491	0.0255562	2917.99	265.703	0.0910566	-1.16293	0.0954132	0.0820456
277	he_5126	16759.2	1852.73	0.11055	40155.5	2648.42	0.0659542	1.15181	0.198619	0.172441
278	xbz_20069	465.951	50.407	0.108181	200.385	20.3959	0.101784	-1.14131	0.131561	0.115272
279	xbz_250	1076.78	19.4917	0.0181018	487.294	39.0309	0.0800973	-1.13516	0.0963089	0.0848414
280	he_531	911.939	80.1478	0.0878873	434.209	18.3415	0.0422413	-1.13315	0.0961056	0.084813
281	xbz_25639	9138.08	195.783	0.021425	4136.68	215.441	0.0520807	-1.12992	0.0453526	0.040138
282	xbz_13680	1551.41	173.217	0.111652	3541.37	302.41	0.0853935	1.12467	0.0591299	0.0525754
283	he_20896	5245.02	573.877	0.109414	2395.31	24.5787	0.0102612	-1.12434	0.141315	0.125686
284	xbz_4815	196.246	5.31534	0.0270851	90.3539	6.53768	0.0723564	-1.12063	0.14356	0.128107
285	xbz_14021	1254.05	66.1313	0.0527342	580.311	95.7557	0.165008	-1.1117	0.143963	0.129498
286	he_20939	10809.3	245.907	0.0227497	5152.44	162.344	0.0315082	-1.10165	0.0669999	0.0608175
287	he_25101	7310.17	170.185	0.0232806	3495.39	182.248	0.0521396	-1.09373	0.0965391	0.088266
288	he_52701	2065.69	297.806	0.144168	970.191	18.8629	0.0194425	-1.09029	0.16551	0.151804
289	he_38247	9389.4	903.231	0.0961969	4280.27	88.6343	0.0207077	-1.09027	0.134713	0.123559
290	he_36506	478.705	19.737	0.04123	220.234	34.5947	0.157082	-1.08697	0.165889	0.152615
291	xbz_13763	8379.26	237.032	0.0282879	3957.93	167.9	0.0424212	-1.08396	0.0255181	0.0235416
292	he_37337	4090.79	425.78	0.104083	1967.48	22.3821	0.011376	-1.08079	0.152956	0.141523
293	he_26307	8801.51	152.445	0.0173204	18608	1139.94	0.0612609	1.07569	0.109748	0.102025
294	he_36832	8144.06	874.239	0.107347	3873.54	139.658	0.0360545	-1.0721	0.102252	0.095376
295	he_53591	374.259	12.8429	0.0343156	176.944	16.293	0.0920799	-1.06187	0.0813886	0.0766463
296	he_39456	5612.13	216.951	0.0386575	2649.69	187.965	0.0709387	-1.06054	0.0707943	0.0667528
297	he_13388	1087.42	136.414	0.125447	524.482	43.7594	0.0834336	-1.05697	0.0537301	0.0508341
298	xbz_9343	1563.57	38.7411	0.0247774	744.992	97.7622	0.131226	-1.05114	0.212171	0.201848
299	xbz_14128	11970.3	501.182	0.0418686	5939.71	198.259	0.0333786	-1.04888	0.0330136	0.0314751
300	xbz_14130	3523.55	152.367	0.0432426	1652.15	126.136	0.0763463	-1.04883	0.156964	0.149656
301	xbz_7110	1108.68	138.759	0.125157	519.317	27.4187	0.0527977	-1.04796	0.145945	0.139266
302	he_47519	12673.6	270.557	0.021348	6187.31	333.846	0.0539566	-1.03445	0.110527	0.106846
303	he_4609	5164.5	245.157	0.0474695	10451.5	354.648	0.0339327	1.01701	0.117798	0.115828
304	he_21561	27037.4	3443.05	0.127344	57841.4	4673.75	0.080803	1.01024	0.128005	0.126707
305	he_26755	244.953	22.8711	0.0933693	121.609	1.44447	0.011878	-1.00715	0.117763	0.116927
306	he_13939	596.925	18.7755	0.0314538	297.664	31.7874	0.10679	-1.00386	0.187269	0.186548
307	he_9772	1101.91	76.6738	0.0695829	2204.35	175.455	0.0795951	1.00032	0.0175003	0.0174947
308	xbz_4638	203.354	1.62439	0.00798802	103.038	21.5458	0.209105	-0.996733	0.315427	0.316461
309	xbz_22723	4710.78	618.08	0.131205	9389.17	724.884	0.0772043	0.99503	0.071657	0.0720149
310	he_17477	1437.86	168.163	0.116954	752.623	20.4421	0.0271612	-0.993485	0.172388	0.173518
311	he_2186	7591.44	721.705	0.0950683	3857.07	151.382	0.0392481	-0.976869	0.082501	0.0844545
312	he_23346	332.278	46.1014	0.138743	178.304	12.5004	0.0701071	-0.971189	0.109687	0.11294
313	he_47515	4577.96	308.893	0.067474	2338.68	157.482	0.067338	-0.969013	0.191473	0.197596
314	xbz_8207	256.289	10.7706	0.042025	138.6	6.79602	0.0490333	-0.966902	0.0581159	0.0601053
315	xbz_14050	193.266	2.44293	0.0126402	99.1197	8.73081	0.0880835	-0.966089	0.109006	0.112832
316	he_42549	500.924	54.9789	0.109755	265.779	25.0365	0.0942003	-0.954918	0.218304	0.22861
317	he_53549	228.847	25.6926	0.11227	118.327	10.766	0.0909847	-0.950034	0.293757	0.309207
318	xbz_8189	485.478	16.0113	0.0329806	251.875	13.2874	0.0527538	-0.947309	0.123732	0.130615
319	xbz_14154	463.051	10.8871	0.0235116	919.901	82.3895	0.0895635	0.942755	0.138638	0.147056
320	he_15398	260.974	12.9585	0.0496544	140.731	8.77525	0.0623548	-0.941162	0.0919914	0.0977424
321	he_43853	17446.5	369.217	0.0211628	9109.96	296.786	0.0325781	-0.937422	0.0761647	0.0812491
322	he_9047	719.247	17.1991	0.0239126	1356.04	100.684	0.0742482	0.922876	0.0875724	0.0948907
323	he_5138	1176.19	57.9627	0.0492799	626.204	92.4375	0.147616	-0.921548	0.263806	0.286264
324	xbz_21085	9262.07	630.088	0.0680289	5020.24	312.839	0.0623155	-0.903373	0.0959798	0.106246
325	xbz_2177	509.411	10.3782	0.0203729	277.012	7.9654	0.0287547	-0.90135	0.0216596	0.0240302
326	he_38577	461.304	38.7908	0.0840894	819.588	66.177	0.0807443	0.900576	0.0716678	0.07958
327	xbz_4929	358.942	21.2671	0.0592495	645.609	32.6839	0.0506249	0.879621	0.0679605	0.0772611
328	TU600	1683.97	25.6592	0.0152374	929.839	49.2429	0.0529585	-0.871136	0.0668733	0.0767657
329	he_37854	12726.7	1335.82	0.104962	7093.44	102.67	0.014474	-0.866873	0.142048	0.163862
330	xbz_19	34453	2628.98	0.0763062	19154.4	1517.69	0.0792344	-0.856508	0.00928321	0.0108384
331	he_35306	324.11	62.8831	0.194018	147.681	22.7738	0.15421	-0.852663	0.260201	0.305162
332	he_9058	255.819	38.6288	0.151	454.112	21.0116	0.0462695	0.845392	0.166898	0.197421
333	he_51344	2420.53	254.328	0.105072	1405.21	170.262	0.121164	-0.845186	0.0907432	0.107365
334	he_15370	588.376	98.0317	0.166614	372.234	30.378	0.0816099	-0.843747	0.171028	0.2027
335	he_37052	657.227	82.04	0.124828	348.177	30.8863	0.0887088	-0.843379	0.162545	0.192731
336	he_14423	1285.58	41.0645	0.0319424	744.867	33.7047	0.0452492	-0.843253	0.0520965	0.0617805
337	he_6836	4381.84	382.26	0.0872374	2451.69	80.3264	0.0327636	-0.837814	0.0846074	0.100986
338	he_38407	8674.62	1053.03	0.121392	4982.01	485.621	0.0974749	-0.834236	0.10374	0.124353
339	xbz_29172	1895.38	38.4352	0.0202784	1063.4	47.0612	0.0442553	-0.833798	0.0337363	0.040461
340	xbz_11369	311.596	25.1962	0.0808618	553.363	140.147	0.253264	0.807399	0.252579	0.312831
341	xbz_3731	4857.12	127.789	0.0263097	2874.9	148.651	0.0517065	-0.806421	0.0704947	0.0874168
342	he_25669	293.806	58.6627	0.199665	173.683	14.1139	0.081262	-0.80441	0.142963	0.177724
343	xbz_9572	694.442	11.2572	0.0162104	398.369	27.2793	0.0684776	-0.801748	0.0795906	0.0992713
344	he_28713	459.407	56.3468	0.122651	271.858	12.5803	0.0462752	-0.801019	0.127424	0.159078
345	xbz_3737	4729.74	128.542	0.0271774	2727.58	123.306	0.045207	-0.79414	0.027204	0.0342559
346	he_52022	259.592	20.2339	0.077945	449.327	32.1956	0.071653	0.791862	0.00910297	0.0114957
347	he_15653	13817.7	1621.37	0.11734	25256.7	2924.24	0.115781	0.791496	0.049937	0.063092
348	xbz_28242	2431.8	306.064	0.125859	1379.2	149.971	0.108738	-0.782034	0.123285	0.157647
349	xbz_20363	664.93	84.2541	0.126711	362.366	50.7278	0.139991	-0.78049	0.0553792	0.0709544
350	xbz_6201	413.83	20.1107	0.0485965	241.989	33.2348	0.13734	-0.780081	0.128629	0.164892
351	he_29970	1460.47	36.9571	0.0253049	852.656	89.1675	0.104576	-0.776414	0.153913	0.198235
352	he_51418	4861.63	208.074	0.0427992	2869.97	182.938	0.0637422	-0.760406	0.0304739	0.0400759
353	he_49836	4315.23	182.107	0.0422011	2598.29	119.737	0.046083	-0.753506	0.0145803	0.0193499
354	he_25081	13162.7	1075.27	0.0816902	22171.6	1202.11	0.0542182	0.752256	0.0408366	0.0542855
355	he_15651	16892.5	2098.46	0.124224	30083.2	3168.92	0.105339	0.749885	0.0642297	0.0856527
356	xbz_8338	15782.4	654.081	0.0414437	26507.2	2035.39	0.0767864	0.74807	0.0563529	0.0753311
357	xbz_17454	16057.2	1800.74	0.112145	25470.1	2454.61	0.0963723	0.747761	0.130665	0.174742
358	he_38575	13312.3	374.491	0.0281312	7614.22	341.374	0.0448338	-0.747535	0.0714413	0.0955692
359	xbz_16514	1556.35	55.9164	0.0359279	892.726	54.7151	0.0612898	-0.742994	0.0624482	0.0840494
360	xbz_27398	4041.39	314.933	0.0779269	2381.55	134.393	0.056431	-0.739511	0.104072	0.140731
361	xbz_8050	16518.5	575.455	0.0348371	27826.1	2051.15	0.0737131	0.73793	0.0635503	0.0861196
362	he_48076	2792.52	201.954	0.0723196	1674.7	57.2205	0.0341677	-0.73767	0.0515137	0.069833
363	he_38583	2328.44	128.646	0.0552498	3863.48	447.127	0.115732	0.730538	0.0863049	0.118139
364	he_31641	16755.6	659.867	0.0393818	27914.9	1944.18	0.0696466	0.727897	0.0510308	0.0701071
365	xbz_26095	7736.66	315.763	0.0408138	4734.94	514.128	0.108582	-0.72681	0.114946	0.158152
366	xbz_29215	14663.5	1236.7	0.084339	22969.1	1792.92	0.0780578	0.720928	0.0676485	0.0938354
367	xbz_26373	2773.55	186.238	0.0671477	1678.84	131.308	0.0782134	-0.717215	0.0880228	0.122728
368	he_15142	15264	1336.05	0.08753	25877.5	2184.32	0.0844101	0.716022	0.0263351	0.0367798
369	he_53109	3956.9	475.766	0.120237	2365.89	145.269	0.0614013	-0.715841	0.106617	0.148939
370	xbz_7667	1309.24	76.0331	0.0580744	742.05	56.9456	0.0767409	-0.708076	0.0768038	0.108468
371	he_53133	15333.6	512.554	0.0334268	25190.5	1553.65	0.0616762	0.707361	0.0469388	0.0663576
372	he_47498	10726.2	365.823	0.0341056	6475	260.913	0.0402954	-0.705051	0.104255	0.14787
373	xbz_13754	13620.9	679.427	0.0498811	22184.8	1393.89	0.0628309	0.703744	0.0211667	0.0300772
374	he_47551	13002.3	963.19	0.0740787	21284.5	1039.76	0.0488506	0.701481	0.0675585	0.0963083
375	he_25753	1006.21	119.568	0.11883	621.882	43.3169	0.0696546	-0.697733	0.23741	0.34026
376	he_8779	17608.3	305.257	0.017336	10621.8	424.236	0.0399401	-0.69604	0.053421	0.0767499
377	he_40709	7939.34	584.912	0.0736726	4785.65	419.005	0.0875546	-0.688384	0.0792878	0.11518
378	xbz_13756	16015.3	527.936	0.0329644	25762.6	1421.42	0.0551739	0.685827	0.0332616	0.0484985
379	he_33594	932.986	60.2775	0.0646071	593.148	13.6856	0.0230729	-0.671487	0.103844	0.154648
380	xbz_13753	17701.9	502.886	0.0284086	28626.4	622.094	0.0217314	0.670957	0.0562751	0.0838729
381	xbz_8337	18147.8	1182.85	0.0651787	28814.4	2549.35	0.0884749	0.666993	0.0349782	0.0524417
382	xbz_11316	14686.9	620.738	0.0422646	9278.55	330.207	0.0355882	-0.657524	0.0468926	0.0713169
383	he_21649	7381.55	628.652	0.0851653	11666.4	814.079	0.0697797	0.657234	0.0226205	0.0344177
384	he_6831	4259.47	562.164	0.13198	2714.5	112.419	0.0414144	-0.649987	0.127834	0.196672
385	he_25080	17579.6	252.101	0.0143406	28040	1098.86	0.0391891	0.645165	0.0615614	0.0954195
386	xbz_29013	15206.8	291.94	0.0191981	23745.1	2082.31	0.0876945	0.642916	0.0974245	0.151535
387	he_5226	348.738	64.249	0.184233	224.502	6.00822	0.0267624	-0.635414	0.266778	0.419849
388	he_6041	32759.2	3466.72	0.105824	23485.8	1424.32	0.060646	-0.630705	0.166648	0.264225
389	xbz_18521	935.063	74.3533	0.0795168	583.47	73.1077	0.125298	-0.626522	0.148303	0.236709
390	xbz_27054	7318.32	35.1061	0.00479702	11271	1190.39	0.105616	0.624497	0.147464	0.236132
391	he_25083	16066.6	239.196	0.0148878	25198.7	1735.4	0.0688684	0.61952	0.106646	0.172143
392	he_44575	1992.77	202.656	0.101696	3000.47	257.69	0.0858834	0.615756	0.0755607	0.122712
393	xbz_11720	7973.41	77.4081	0.00970828	12401.4	542.24	0.0437242	0.61508	0.0649059	0.105524
394	he_9634	16062.9	400.426	0.0249287	23850.9	1445.43	0.0606027	0.611379	0.0819593	0.134056
395	he_30905	9704.72	848.929	0.0874759	6360.72	311.766	0.0490143	-0.609497	0.0536822	0.0880761
396	he_47479	5867.98	189.981	0.0323758	3667.28	283.038	0.0771792	-0.605337	0.136747	0.225903
397	he_4037	15932.8	1979.34	0.124231	10503.5	338.46	0.0322235	-0.601127	0.12831	0.213449
398	he_14017	45185.1	2019.88	0.0447023	30462.1	509.66	0.0167309	-0.591463	0.0520959	0.0880797
399	he_17857	571.71	27.769	0.0485718	384.623	44.1609	0.114816	-0.575757	0.095908	0.166577
400	he_27671	443.785	87.3018	0.196721	654.955	70.173	0.107142	0.571475	0.130791	0.228865
401	xbz_22825	1977.29	139.81	0.0707076	1334.15	259.544	0.194538	-0.567601	0.183959	0.324099
402	xbz_23504	4496.19	480.094	0.106778	3002.98	249.753	0.0831684	-0.557814	0.107608	0.19291
403	xbz_29174	1666.31	69.3457	0.0416162	1146.1	88.8412	0.0775159	-0.553374	0.0636787	0.115073
404	he_35750	10892.9	1210.73	0.111148	15862.7	1022.33	0.0644482	0.542256	0.0675035	0.124486
405	he_18278	43673	3336.32	0.0763932	30037.4	382.717	0.0127413	-0.539978	0.0907252	0.168016
406	he_5651	8769.14	890.602	0.101561	14003.4	800.532	0.0571671	0.538945	0.173383	0.321709
407	he_20919	12909.2	1339.91	0.103795	8804.22	154.814	0.0175841	-0.535971	0.132798	0.247771
408	he_52854	13752.4	1614.66	0.117409	9621.92	604.627	0.0628385	-0.530679	0.0907438	0.170996
409	he_12204	11333.1	129.52	0.0114285	15997.2	1059.48	0.0662288	0.520932	0.0833582	0.160018
410	xbz_6475	9838.74	439.725	0.0446933	14079.5	290.64	0.0206428	0.51705	0.0355322	0.0687209
411	he_47505	11984.6	416.768	0.0347751	8132.86	403.732	0.0496421	-0.512104	0.0972818	0.189965
412	he_25103	8235.35	299.725	0.036395	5681.96	414.628	0.0729728	-0.511113	0.0626908	0.122655
413	he_53230	2561.2	177.421	0.0692724	1800.87	37.2597	0.0206899	-0.50813	0.130106	0.256048
414	xbz_24446	2175.2	30.9755	0.0142403	3089.79	76.1639	0.0246502	0.506358	0.0160302	0.0316578
415	he_53034	1596.04	171.578	0.107502	1036.98	103.835	0.100131	-0.506104	0.113631	0.224521
416	he_41735	1985	153.798	0.0774801	1284.45	98.8972	0.0769959	-0.505725	0.170233	0.336611
417	he_36910	33632.7	3834.01	0.113997	24484.7	1294.72	0.0528789	-0.501724	0.213063	0.424661
418	he_42966	4580.51	569.587	0.12435	3170.86	306.006	0.0965057	-0.482577	0.127926	0.265088
419	xbz_29278	3005.18	275.124	0.09155	1968.14	154.574	0.0785377	-0.465014	0.107056	0.23022
420	he_26540	37731.3	849.244	0.0225077	27365.7	2110.33	0.0771159	-0.463391	0.141922	0.306268
421	xbz_25897	18042.5	558.485	0.0309538	13032.4	181.684	0.0139409	-0.462383	0.0314987	0.0681225
422	he_26246	35778.7	744.701	0.0208141	26135.8	1000.82	0.0382929	-0.458907	0.0838812	0.182785
423	he_2914	7691.92	811.058	0.105443	10526.2	254.613	0.0241885	0.452571	0.115459	0.255119
424	xbz_13765	8039.77	221.91	0.0276016	5876.17	436.304	0.0742496	-0.452277	0.0751161	0.166084
425	he_47213	17918.5	759.012	0.0423592	12642.4	308.803	0.024426	-0.446536	0.0650369	0.145648
426	xbz_28240	7197.61	726.223	0.100898	5343.42	348.694	0.0652567	-0.429756	0.0737654	0.171645
427	he_30884	11384.1	977.381	0.0858548	8585.63	522.731	0.0608844	-0.421745	0.0406507	0.0963867
428	xbz_16233	21650.9	397.89	0.0183776	16202.3	1107.61	0.0683611	-0.418226	0.0713785	0.17067
429	xbz_14049	21408.2	1026.52	0.0479496	16033.8	566.089	0.0353059	-0.417046	0.119126	0.285641
430	he_35606	11685.1	81.9537	0.00701352	15520.7	1324.76	0.0853548	0.409521	0.126172	0.308098
431	he_51342	8380.49	171.664	0.0204838	6367.85	104.382	0.0163921	-0.405295	0.0468769	0.115661
432	he_7043	9721.99	194.246	0.01998	7367.83	576.647	0.0782655	-0.400011	0.0860561	0.215134
433	he_30695	31500.5	3277.45	0.104044	43759.9	4490.86	0.102625	0.389217	0.0513348	0.131892
434	he_29304	8423.03	56.821	0.0067459	6449.6	400.861	0.0621528	-0.386862	0.0992479	0.256546
435	he_2388	3582.12	383.257	0.106992	4675.55	347.852	0.0743981	0.384322	0.0476827	0.12407
436	he_51961	25643.9	2603.24	0.101515	20002.6	1187.18	0.0593515	-0.381078	0.0727212	0.19083
437	xbz_3182	34507.3	1272.83	0.0368857	26591.2	995.436	0.0374348	-0.377664	0.00146212	0.00387149
438	he_21967	7546.72	797.481	0.105673	9656.41	143.099	0.0148191	0.37704	0.141278	0.374703
439	he_43348	10965.5	137.562	0.012545	8519.95	258.164	0.0303012	-0.364056	0.0601024	0.165091
440	he_5346	2678.46	282.39	0.10543	3662.54	184.625	0.0504091	0.362101	0.175758	0.485383
441	xbz_29314	1654.07	98.0493	0.0592775	1289.11	103.269	0.080109	-0.360699	0.0301272	0.0835247
442	xbz_14675	38593.8	1834.48	0.0475329	30857.8	1826.56	0.059193	-0.355658	0.0302158	0.0849576
443	he_2975	28541.3	3752.1	0.131462	38037	1680.92	0.0441917	0.353088	0.148169	0.419638
444	he_4234	4102.27	354.775	0.0864826	3208.38	48.4031	0.0150865	-0.351956	0.103158	0.293099
445	he_53589	3764.57	35.0444	0.00930902	2955.04	88.571	0.0299728	-0.349597	0.0298178	0.085292
446	xbz_8328	808.597	27.2141	0.033656	1023.13	12.2964	0.0120184	0.339858	0.0659038	0.193916
447	he_19742	38135.6	3075.09	0.0806358	30281.9	851.313	0.0281129	-0.332683	0.0788187	0.236918
448	he_1493	4846.55	247.868	0.0511431	3857.92	231.228	0.0599361	-0.330996	0.017341	0.0523905
449	he_45012	28784.1	482.819	0.0167738	36064.3	1217.65	0.0337632	0.3253	0.0724458	0.222705
450	xbz_20511	6882.95	72.2862	0.0105022	5550.29	563.639	0.101551	-0.322354	0.141326	0.43842
451	he_48081	1687.11	160.865	0.0953492	2106.44	220.59	0.104722	0.31957	0.0135897	0.042525
452	he_47514	7623.32	290.639	0.038125	9274.03	343.729	0.0370636	0.31932	0.100765	0.315563
453	he_32726	14546.8	1658.43	0.114006	12475.6	1199.59	0.0961548	-0.317904	0.0668333	0.210231
454	xbz_5246	29469.9	1098.26	0.037267	36658	1433.4	0.0391019	0.314024	0.00328338	0.0104558
455	he_29521	20448.7	2296.25	0.112293	15241.7	944.347	0.0619582	-0.306663	0.149312	0.486892
456	xbz_998	38204.7	1373.19	0.035943	30604.8	944.808	0.0308713	-0.293789	0.0223556	0.076094
457	he_52910	31766.7	4016.98	0.126453	26139.8	2077.65	0.0794819	-0.293142	0.0703729	0.240064
458	he_18225	37534.6	2654.73	0.0707275	30670.1	791.712	0.0258138	-0.291389	0.0679867	0.23332
459	xbz_7517	2709.77	74.9471	0.0276581	2215.02	67.4946	0.0304714	-0.290915	0.00406047	0.0139576
460	xbz_8644	6285.37	446.926	0.0711058	5163.77	359.188	0.0695593	-0.288405	0.102737	0.356225
461	he_20968	19958.9	2152.85	0.107864	24142.2	794.783	0.0329209	0.279173	0.119934	0.429604
462	he_47554	17837.1	1268.66	0.0711248	20987.4	1068.32	0.050903	0.27487	0.0692512	0.251942
463	he_31035	33135.4	4257.69	0.128494	28528.6	3109.2	0.108985	-0.262393	0.0426365	0.162491
464	he_47874	28586.3	2174.69	0.0760743	34899.7	1938.82	0.055554	0.26007	0.0472485	0.181676
465	he_35611	10378.8	463.888	0.0446955	8674.99	1072.9	0.123677	-0.258711	0.128559	0.49692
466	he_40138	11867.8	174.722	0.0147223	13970.1	504.397	0.0361055	0.256992	0.069574	0.270724
467	xbz_26127	18672.8	528.208	0.0282876	22561.3	731.362	0.0324166	0.255076	0.014182	0.055599
468	he_28378	30622.6	1634.05	0.0533609	37594.6	2506.86	0.0666814	0.254154	0.0372812	0.146687
469	he_49538	15845	1180.34	0.0744933	12667	809.296	0.0638901	-0.252556	0.111594	0.441857
470	xbz_21862	30555	950.095	0.0310946	36629	1350.95	0.0368818	0.250504	0.0735685	0.293682
471	he_9776	4858.06	109.829	0.0226075	5770.72	110.444	0.0191388	0.248369	0.0596851	0.240308
472	he_46823	25848.4	1049.88	0.0406167	21805.7	417.771	0.0191588	-0.245373	0.0358937	0.146282
473	he_29411	29219.3	2452.81	0.0839448	37171.5	3160.56	0.0850265	0.24449	0.0594401	0.243119
474	he_28866	30324	2248.12	0.0741368	36874.6	3254.52	0.0882589	0.234991	0.0456939	0.19445
475	xbz_27642	6379.15	114.074	0.0178823	5424.97	122.915	0.0226572	-0.233819	0.00689019	0.029468
476	he_1991	32459.1	4148.06	0.127793	27636.6	1794.15	0.0649193	-0.232043	0.0879012	0.378814
477	he_25668	17199.2	814.767	0.0473723	19796.4	467.198	0.0236002	0.23169	0.0946202	0.408391
478	he_52106	5285.85	127.352	0.0240929	4504.07	197.542	0.0438585	-0.23139	0.0285326	0.12331
479	xbz_29532	4075.28	123.76	0.0303684	3472.95	98.537	0.0283727	-0.230693	0.0028804	0.0124858
480	he_38409	17280.6	2041.37	0.118131	20497.6	2469.01	0.120454	0.230381	0.013369	0.05803
481	he_8776	42696.4	884.029	0.020705	36410.8	1448.89	0.0397928	-0.229749	0.0850511	0.370191
482	he_9646	29646.3	924.479	0.0311836	33568.5	2880.93	0.0858224	0.226586	0.106845	0.471544
483	xbz_15625	28359.6	31.0884	0.00109622	24263.1	609.364	0.0251148	-0.225297	0.0346553	0.153821
484	he_40719	33945.2	921.861	0.0271573	39539.4	1775.55	0.044906	0.223181	0.0645022	0.289012
485	he_13555	16332.7	492.835	0.0301747	19009.6	201.971	0.0106247	0.21896	0.0571714	0.261104
486	he_28451	28569.2	1194.4	0.0418072	24556.9	228.699	0.00931303	-0.217732	0.0737687	0.338805
487	he_53189	35314.1	4570.03	0.129411	41014.4	3542.34	0.0863681	0.208984	0.0605136	0.289561
488	he_40343	34658.9	917.742	0.0264793	40618.2	1792.89	0.0441401	0.205835	0.0669051	0.325042
489	he_25099	14435.9	1060.73	0.0734784	16646.7	1512.85	0.0908801	0.204537	0.0251906	0.123159
490	xbz_5579	25392.3	2188.02	0.0861689	22242.1	1789.43	0.0804523	-0.19451	0.0104972	0.0539673
491	he_50323	6740.3	407.641	0.0604782	5917.88	613.659	0.103696	-0.1903	0.0625656	0.328774
492	he_10363	27022.1	3456.08	0.127898	24908.4	2864.56	0.115004	-0.18985	0.0487041	0.25654
493	xbz_7200	16265.7	420.802	0.0258706	18546	856.686	0.0461924	0.183884	0.0351482	0.191143
494	he_15724	38816.2	2186.82	0.056338	44439.1	845.704	0.0190306	0.180642	0.0614472	0.34016
495	he_40110	14781.7	220.264	0.0149011	13176.1	357.8	0.0271553	-0.165892	0.0608763	0.366964
496	he_47558	23574.7	1768.68	0.0750245	26029.5	1286.23	0.0494143	0.163484	0.0604745	0.36991
497	he_27706	18917.7	1255.08	0.066344	16890.7	984.352	0.0582777	-0.163143	0.01166	0.0714711
498	he_43686	22755	626.885	0.0275493	25139.3	619.959	0.024661	0.160406	0.059634	0.37177
499	xbz_17038	23277.7	511.853	0.021989	26072.5	530.631	0.0203521	0.157362	0.0560635	0.356271
500	he_47544	22816.6	1342	0.058817	24930.8	903.222	0.0362292	0.15507	0.0617929	0.398483
501	xbz_12781	17908.8	904.831	0.0505244	16124.7	565.317	0.0350591	-0.15092	0.0223324	0.147975
502	he_30317	18428.7	1600.91	0.0868704	16999.6	1016.75	0.05981	-0.150721	0.0567276	0.376376
503	he_30831	20984.5	1864.07	0.0888308	24310.7	1825.3	0.0750821	0.150095	0.0482717	0.321608
504	he_8778	41747.8	240.906	0.00577052	37646	492.149	0.013073	-0.14925	0.0105358	0.0705918
505	xbz_23915	22650.5	857.851	0.0378733	25017	210.61	0.00841866	0.144525	0.0552561	0.382329
506	he_52927	31167	5229.98	0.167805	28218.2	3450.07	0.122264	-0.138578	0.0664063	0.479196
507	xbz_26118	23781.6	575.747	0.0242097	25474.1	302.595	0.0118785	0.119374	0.0254901	0.213532
508	he_32394	9123.42	56.8153	0.0062274	9911.02	208.161	0.0210029	0.119313	0.0213188	0.17868
509	he_9068	8425.92	543.209	0.0644688	9132.31	498.295	0.054564	0.11657	0.014315	0.122801
510	he_47546	20522.4	1208.43	0.0588836	22207.5	1315.99	0.0592588	0.113832	0.000542143	0.00476264
511	he_29126	18795.5	1105.99	0.0588432	20193.6	1630.35	0.0807362	0.102404	0.0316627	0.309194
512	xbz_26125	20880.2	744.729	0.0356667	19563.8	631.15	0.032261	-0.0957972	0.0089527	0.0934547
513	he_45766	23093.1	825.479	0.0357457	24611.6	203.2	0.00825625	0.0923113	0.0396697	0.429738
514	he_23428	14733	829.642	0.0563118	15648.4	749.382	0.0478888	0.0872745	0.0121682	0.139425
515	he_47085	27336.2	758.022	0.0277296	25779.2	85.5403	0.00331819	-0.0843315	0.0352234	0.417678

## Sheet: 可检测转录子
Sample A							Sample B
No.	探针_ID	平均信号值	重复探针点间标准偏差	重复探针点间变异系数	可检测重复次数		No.	探针_ID	平均信号值	重复探针点间标准偏差	重复探针点间变异系数	可检测重复次数
1	he_1011	665.849	43.9529	0.0660103	3 out of 3		1	he_10106	27.9826	1.47274	0.0526308	3 out of 3
2	he_1012	3541.29	426.16	0.120341	3 out of 3		2	he_1011	1875.18	142.168	0.0758153	3 out of 3
3	he_10229	2537.73	139.352	0.0549121	3 out of 3		3	he_1012	1373.11	130.176	0.0948037	3 out of 3
4	he_10363	27446.6	3456.08	0.12592	3 out of 3		4	he_10229	847.994	104.689	0.123455	3 out of 3
5	he_10527	13770.8	413.661	0.030039	3 out of 3		5	he_10363	24341.4	2864.56	0.117683	3 out of 3
6	he_10636	18.9723	0.858237	0.0452363	2 out of 3		6	he_10527	5556.59	81.8368	0.0147279	3 out of 3
7	he_11072	27.5321	5.65167	0.205276	3 out of 3		7	he_10552	600.913	80.9646	0.134736	3 out of 3
8	he_11181	3278.2	53.1198	0.0162039	3 out of 3		8	he_10636	14.5113	0.624733	0.0430514	2 out of 3
9	he_11413	18.7393	5.90015	0.314854	2 out of 3		9	he_11072	23.3117	1.04984	0.0450349	3 out of 3
10	he_11415	25.6895	11.7233	0.456346	2 out of 3		10	he_11181	10201	696.178	0.0682459	3 out of 3
11	he_11517	16.6082	4.31625	0.259887	3 out of 3		11	he_11413	251.657	13.7437	0.0546126	3 out of 3
12	he_11553	74.8175	13.7535	0.183827	3 out of 3		12	he_11415	305.427	29.4697	0.0964869	3 out of 3
13	he_11555	423.579	48.2673	0.113951	3 out of 3		13	he_11517	16.5325	1.70531	0.103149	3 out of 3
14	he_11751	35.7178	4.71857	0.132107	3 out of 3		14	he_11553	60.166	8.44338	0.140335	3 out of 3
15	he_11793	3540.45	136.006	0.0384151	3 out of 3		15	he_11555	287.274	6.60793	0.0230022	3 out of 3
16	he_12051	18.9376	2.21247	0.116829	3 out of 3		16	he_11793	11582.9	114.582	0.0098923	3 out of 3
17	he_12052	17.1464	4.43427	0.258613	3 out of 3		17	he_12052	14.8892	3.42331	0.22992	2 out of 3
18	he_12202	1418.64	30.2278	0.0213075	3 out of 3		18	he_12202	446.563	21.2158	0.047509	3 out of 3
19	he_12204	11293.5	129.52	0.0114685	3 out of 3		19	he_12204	16427.5	1059.48	0.0644943	3 out of 3
20	he_129	21.7804	6.2988	0.289196	2 out of 3		20	he_12443	10.5688	2.4703	0.233736	2 out of 3
21	he_13183	349.74	22.6228	0.0646847	3 out of 3		21	he_12588	49.4499	5.72375	0.115748	3 out of 3
22	he_13388	1144.01	136.414	0.119242	3 out of 3		22	he_1289	13.2268	0.610095	0.0461256	2 out of 3
23	he_13555	16054.7	492.835	0.0306972	3 out of 3		23	he_129	118.133	5.97402	0.0505702	3 out of 3
24	he_13758	22727.4	742.734	0.0326801	3 out of 3		24	he_13117	15.0217	2.51104	0.16716	2 out of 3
25	he_138	20.8492	3.37052	0.161662	2 out of 3		25	he_13183	296.331	33.5437	0.113197	3 out of 3
26	he_13856	9456.67	381.322	0.0403231	3 out of 3		26	he_13388	537.81	43.7594	0.081366	3 out of 3
27	he_13939	606.85	18.7755	0.0309394	3 out of 3		27	he_13555	18961.6	201.971	0.0106516	3 out of 3
28	he_14017	45496.2	2019.88	0.0443966	3 out of 3		28	he_13758	21767.2	256.046	0.011763	3 out of 3
29	he_14115	2544.93	197.489	0.0776011	3 out of 3		29	he_13856	2281.71	73.81	0.0323485	3 out of 3
30	he_14382	28.0119	13.7001	0.489081	2 out of 3		30	he_13939	303.772	31.7874	0.104642	3 out of 3
31	he_14386	76.7337	18.9337	0.246745	3 out of 3		31	he_14017	30485.5	509.66	0.0167181	3 out of 3
32	he_14393	21.5717	1.685	0.0781119	2 out of 3		32	he_14115	2271.97	50.8492	0.0223811	3 out of 3
33	he_14422	19.5777	2.684	0.137095	2 out of 3		33	he_14371	20.3653	3.15404	0.154874	3 out of 3
34	he_14423	1309.25	41.0645	0.0313648	3 out of 3		34	he_14382	52.8806	5.67961	0.107404	3 out of 3
35	he_1492	1303.3	78.5672	0.060283	3 out of 3		35	he_14386	5870.78	189.305	0.0322453	3 out of 3
36	he_1493	4897.77	247.868	0.0506083	3 out of 3		36	he_14393	996.945	49.7787	0.0499313	3 out of 3
37	he_15138	21.5089	6.97494	0.324281	3 out of 3		37	he_14423	731.344	33.7047	0.0460859	3 out of 3
38	he_15140	2407.88	225.317	0.093575	3 out of 3		38	he_1492	17452.3	878.405	0.0503319	3 out of 3
39	he_15142	15457.4	1336.05	0.0864349	3 out of 3		39	he_1493	3870.59	231.228	0.0597399	3 out of 3
40	he_15201	15.4628	1.36687	0.0883972	2 out of 3		40	he_15138	50.0536	4.29885	0.0858848	3 out of 3
41	he_15370	638.972	98.0317	0.153421	3 out of 3		41	he_15140	873.971	48.0783	0.0550113	3 out of 3
42	he_15397	91.8347	2.62492	0.0285831	2 out of 3		42	he_15142	25658.2	2184.32	0.0851317	3 out of 3
43	he_15398	263.955	12.9585	0.0490936	3 out of 3		43	he_15199	11.5689	1.07992	0.0933468	2 out of 3
44	he_15588	5159.05	200.38	0.0388406	3 out of 3		44	he_15201	32.4986	8.10948	0.249533	3 out of 3
45	he_15624	787.909	53.4731	0.0678671	3 out of 3		45	he_15370	356.295	30.378	0.0852608	3 out of 3
46	he_15651	17110.3	2098.46	0.122643	3 out of 3		46	he_15397	39.0478	8.24614	0.211181	3 out of 3
[truncated: 709 more rows]
