# Supplementary material for: Distinct MicroRNA Subcellular Size and Expression Patterns in Human Cancer Cells
Source: Int J Cell Biol. 2012 Feb 12;2012:672462. doi: 10.1155/2012/672462 (PMC3296955; doi:10.1155/2012/672462)
Supplement: Supplementary file 2 [file 672462.f2.xls]

## Sheet: 文件信息
数据报告
数据信息
布局文件	miRHuman_10.1_AUR_0080314.xls
原始图像文件	02_AUR_080580-0403-385-500.tif
处理后图像A文件	02_AUR_080580-0403-385cy3.tif
处理后图像B文件	02_AUR_080580-0403-500cy5.tif
数据处理软件	ArrayPro
过滤条件	Morphological filter, Open, 3×3 Cross, 2 passes
实验信息
实验日期	2008-04-03
芯片 ID	02_AUR_080580
样品来源
样品 A
样品 ID	3
收样日期	2008-03-14
标记染料	Cy3
样品 B
样品 ID	4
收样日期	2008-03-14
标记染料	Cy5
数据采集条件
扫描仪	Axon GenePix 4000B Microarray Scanner
像素尺寸	10 µm
样品 A 增益	385
样品 B 增益	500
数据分析信息
样品 A 背景值	103.977
样品 A 背景标准偏差	3.85857
样品 B 背景值	30.5648
样品 B 背景标准偏差	0.86177
归一化方法	Global Normalization
客户信息
机构名称
定单信息
收单日	2008-03-14
客户 PO Number
销售定单 No.	2319-S81191
支持信息
技术联系	Customer Support
电话	713-664-7087
Email	support@lcsciences.com

## Sheet: 显著差异数值
No.	探针_ID	Sample A 信号中值	Sample B 信号中值	log2 (Sample B / Sample A)
1	he_9720	4.93617	3353.33	9.41037
2	he_28473	56.7666	16335.4	8.16874
3	xbz_1041	6116.3	36.7702	-7.37798
4	he_2066	6867.98	48.6902	-7.1471
5	he_31030	76.1128	10529.6	7.10099
6	he_28474	230.549	25167.5	6.79375
7	he_9721	53.1387	5721.13	6.74591
8	he_21871	4.14094	395.964	6.53515
9	he_31032	82.8307	6567.69	6.30908
10	he_28482	172.805	12985.6	6.277
11	he_25728	15045.6	182.239	-6.2521
12	he_16349	29.2672	1797.78	5.95938
13	he_17441	34.0078	2058.9	5.9574
14	he_31029	22.6504	1365.19	5.91343
15	he_14386	143.345	8166.5	5.83615
16	he_28476	151.204	8351.69	5.83236
17	he_42318	8.53621	214.129	5.7029
18	he_32353	13.9652	685.359	5.61695
19	he_981	107.12	4956.27	5.54833
20	he_9463	154.303	6487.91	5.40872
21	he_28480	247.011	8506.56	5.12906
22	he_25712	845.874	26.6221	-5.01943
23	he_21873	49.4413	1721.77	4.99024
24	he_31031	49.1096	1495.75	4.92872
25	he_25733	8222.33	277.359	-4.88133
26	he_10552	4.63907	131.621	4.82641
27	he_37889	116.139	3036.06	4.80054
28	he_21059	13.3136	370.552	4.7987
29	he_14393	38.7026	1025.05	4.79069
30	he_38881	1342.93	48.8815	-4.70426
31	xbz_14113	5536.06	247.005	-4.56244
32	xbz_15823	10.7947	242.545	4.48985
33	he_41344	20.7506	394.067	4.24722
34	he_21872	19.8317	331.697	4.04921
35	he_593	83.5462	1354.98	4.01956
36	he_52722	3388.3	215.498	-3.97944
37	he_31383	22.957	359.825	3.97925
38	xbz_28951	3717.11	237.943	-3.96161
39	he_22404	7.35325	101.525	3.78732
40	he_22155	4.49599	60.2006	3.78217
41	he_596	30.3597	419.949	3.7553
42	he_46744	58.5942	767.963	3.73338
43	xbz_2724	504.079	38.7138	-3.7161
44	he_11415	11.831	156.122	3.66521
45	TU371	1117.7	94.7545	-3.56019
46	he_33125	11031.2	885.6	-3.49453
47	he_28827	20.3349	224.175	3.4626
48	rt_chr2_D_3	37.2706	3.52606	-3.40686
49	he_28483	14.8169	136.955	3.34215
50	he_25669	1541.96	157.992	-3.29128
51	he_37892	72.6638	630.952	3.27779
52	he_31033	25.8985	232.378	3.27028
53	xbz_18521	34.33	313.386	3.23655
54	he_25674	8210.13	901.997	-3.18813
55	xbz_27400	618.171	67.9663	-3.18511
56	he_11413	16.1596	142.843	3.1715
57	he_5221	308.375	36.125	-3.11962
58	he_6656	27.1786	3.38631	-3.10188
59	he_365	37.0315	319.487	3.0697
60	xbz_15821	33.6453	279.543	3.04899
61	he_17407	39.1619	321.944	3.03929
62	he_25688	520.112	69.328	-2.96472
63	he_46242	16810.8	2208.19	-2.92845
64	he_16755	5271.43	716.403	-2.87935
65	xbz_8958	5079.85	685.754	-2.85989
66	he_598	34.2896	247.207	2.85958
67	he_25676	477.433	65.426	-2.85556
68	he_49840	697.578	91.8313	-2.81986
69	he_51788	17.9854	126.864	2.81839
70	he_31018	31.634	223.091	2.81809
71	TU757	173.975	25.3407	-2.77935
72	TU206	331.23	48.7822	-2.77264
73	he_23954	289.871	45.6176	-2.73756
74	TU315	1953.06	306.149	-2.69297
75	he_25586	36.0337	248.767	2.67458
76	he_36697	5868.49	979.574	-2.60207
77	he_35693	895.432	153.132	-2.59351
78	he_20181	1088.43	195.977	-2.5122
79	he_6841	69.3266	13.4181	-2.48105
80	he_25588	35.8797	206.765	2.45888
81	xbz_20219	5049.09	917.779	-2.43554
82	he_12588	10.5467	54.332	2.43475
83	he_18129	140.836	784.323	2.43363
84	he_33594	59.1157	319.212	2.4329
85	xbz_14050	320.781	73.9132	-2.42058
86	TU327	199.024	37.6209	-2.41607
87	xbz_3740	70.5577	14.8686	-2.36982
88	xbz_12548	35114	6827.65	-2.36271
89	he_41264	35.9319	184.302	2.35874
90	he_20697	2164.23	426.236	-2.34413
91	he_2174	592.348	113.023	-2.33962
92	he_28825	64.2266	346.88	2.33553
93	he_50723	23103.3	4633.54	-2.31103
94	xbz_22825	431.701	2180.53	2.30911
95	he_46408	4899.73	999.635	-2.30497
96	he_21594	172.972	888.415	2.28061
97	TU79	1300.92	270.149	-2.2677
98	he_18955	25.3874	116.731	2.21838
99	xbz_12775	11399.4	2513.11	-2.21359
100	he_2937	66.2989	304.219	2.19914
101	he_25100	199.166	34.4713	-2.19337
102	TU126_1	140.82	31.2403	-2.1789
103	he_6808	41.031	9.0789	-2.1777
104	xbz_19721	577.533	126.052	-2.17332
105	he_52751	48.7494	10.8407	-2.17252
106	xbz_11688	784.506	172.388	-2.15711
107	he_42311	38.9715	172.954	2.1499
108	TU600	916.333	223.099	-2.13502
109	he_52701	1938.01	445.879	-2.11985
110	he_38204	77.8464	338.055	2.11856
111	he_38779	469.854	114.493	-2.11104
112	he_15138	16.1619	69.8479	2.10604
113	he_4902	264.018	65.0554	-2.09147
114	he_25673	1426.81	336.721	-2.08253
115	he_9090	579.727	2303.22	2.06408
116	he_41735	478.291	2061.18	2.05655
117	he_35559	2089.84	513.196	-2.02581
118	he_27079	25.4831	99.4537	2.00029
119	xbz_14128	22008.4	5439.28	-1.95909
120	xbz_14070	470.692	147.548	-1.9496
121	xbz_5978	33.9657	8.88802	-1.93247
122	xbz_14129	10948.1	3053.86	-1.90026
123	he_35269	47.1621	181.897	1.89779
124	xbz_23536	2072.8	7328.79	1.89153
125	he_42549	220.608	54.4319	-1.88762
126	xbz_8656	274.384	74.3198	-1.88438
127	he_4201	40.2683	157.173	1.88063
128	he_38410	103.205	28.0722	-1.87786
129	he_5002	39.3242	10.7083	-1.87546
130	xbz_21088	66.4841	18.1598	-1.87228
131	he_23413	8867.13	2396.23	-1.87054
132	he_23031	103.462	28.7007	-1.84994
133	he_25098	157.195	43.4838	-1.84618
134	he_36840	45.0406	12.5952	-1.83916
135	he_21878	855.377	3034.32	1.82674
136	xbz_10910	115.125	32.1895	-1.82261
137	xbz_3026	2402.4	8504.22	1.82168
138	he_5727	2612.1	9110.98	1.80842
139	he_9638	67.6045	19.5584	-1.78933
140	he_43060	2543.79	8734.93	1.77982
141	xbz_3733	22.2741	72.7077	1.77138
142	xbz_27398	1540.59	5315.21	1.76587
143	he_37488	62.5944	18.3917	-1.76015
144	he_129	27.9913	100.546	1.75924
145	he_40174	1502.03	5078.98	1.75763
146	xbz_2177	52.6889	166.677	1.75414
147	he_49836	1657.27	5716.89	1.75406
148	he_38408	45.6324	13.5386	-1.75345
149	he_41210	21736.9	6116.8	-1.74125
150	he_10363	12435	39531.4	1.74057
151	he_25101	1690.1	5606.53	1.72797
152	xbz_7517	397.15	1307.18	1.7187
153	he_11553	40.4493	126.433	1.70867
154	he_40142	2029.82	6615.15	1.70442
155	he_24113	1070.5	357.2	-1.6959
156	xbz_6201	105.76	332.336	1.69331
157	xbz_13763	1278.84	4191.94	1.6851
158	xbz_13762	118.994	36.4529	-1.68431
159	he_25748	8666.4	2634.45	-1.6645
160	xbz_14983	8427.89	28025	1.66429
161	xbz_5579	10197.8	32746.8	1.66222
162	he_44968	26.1209	81.1302	1.65785
163	xbz_21085	1396.56	4464.58	1.64954
164	he_26104	1991.52	642.374	-1.63239
165	xbz_8644	4369.64	1412.23	-1.62953
166	he_4723	3796.81	11657.2	1.61836
167	he_36543	11991.7	3766.49	-1.61647
168	xbz_13756	5877.06	18161	1.61354
169	xbz_16233	8310.77	26597.3	1.60978
170	he_8209	937.493	316.544	-1.60829
171	he_25080	7273.26	20843.8	1.60782
172	he_14115	459.286	1374.91	1.60401
173	he_20180	1884.65	629.665	-1.60122
174	he_50065	11425.1	3511.71	-1.59113
175	he_15142	6252.61	18947.4	1.59112
176	he_36542	111.675	36.1441	-1.59024
177	xbz_13753	7134.51	21418.3	1.58596
178	he_31641	6754.4	20213.5	1.58142
179	he_35178	23276.5	7537.82	-1.581
180	he_44379	15722.3	4981.88	-1.5788
181	he_29521	9339.62	27836.8	1.57556
182	he_25083	6267.63	18672.5	1.57493
183	xbz_8337	7385.76	22076.9	1.57257
184	he_4967	27048.7	9163.24	-1.56163
185	xbz_8050	6237.95	18387.8	1.5596
186	he_20915	6761.18	2451.99	-1.55645
187	he_33649	17796	5719.65	-1.54951
188	xbz_27253	70.5252	24.1383	-1.53964
189	he_53133	6488.38	18843	1.5381
190	he_38407	1728.22	4885.31	1.53808
191	xbz_17454	7603.59	23495.3	1.53749
192	he_25081	5987.01	17372.4	1.53689
193	he_35606	6926.89	2418.65	-1.518
194	he_51983	60.4062	171.956	1.50927
195	xbz_13760	124.047	43.6577	-1.50658
196	he_15653	5755.71	15297.2	1.50554
197	xbz_29215	6212.38	17682.3	1.50119
198	he_37851	29920.2	9913.68	-1.49505
199	xbz_13754	5926.24	17017.8	1.48646
200	TU100,TU232	62.178	22.2652	-1.48587
201	he_15651	8724.7	23849.3	1.4817
202	he_47535	3596.17	1296.97	-1.45697
203	he_24979	1446.03	3946.92	1.45399
204	xbz_11894	1710.91	4674.02	1.4499
205	xbz_8338	5535.99	15091.6	1.44683
206	he_28969	21750.9	7825.2	-1.43633
207	xbz_19	40625.6	15194.1	-1.4352
208	he_26137	28872.4	10755.7	-1.43415
209	xbz_3731	726.493	1962.56	1.43372
210	he_5403	123.665	46.9826	-1.42701
211	xbz_250	156.761	421.335	1.4264
212	he_15588	20783.8	8046.24	-1.41685
213	he_6836	694.556	1840.6	1.38779
214	he_31698	89.6777	31.2864	-1.38615
215	he_9772	1478.85	3831.07	1.37219
216	xbz_28632	7193.83	19116.8	1.36546
217	xbz_11034	7477.27	19445.5	1.35419
218	he_16205	68.4356	174.351	1.34918
219	he_52010	49.3855	124.265	1.34746
220	he_37871	19773.3	7773.57	-1.34691
221	he_32394	3642.07	9245.1	1.34393
222	he_12204	4650.33	10842.6	1.33876
223	he_40976	40.4851	100.812	1.33441
224	he_25777	3554.48	1385.19	-1.33013
225	he_4234	5703.6	2273.13	-1.32391
226	xbz_3737	711.449	1858.52	1.32364
227	he_31014	428.998	1029.07	1.31087
228	xbz_13765	1542.97	3920.12	1.30498
229	he_46034	21603.6	8683.18	-1.2984
230	he_2031	22633.5	9312.55	-1.29029
231	he_25103	1585.68	3853.13	1.28093
232	he_33647	26759.3	10318.5	-1.27857
233	he_38409	6245.7	15138.1	1.27725
234	he_41259	21405.6	8628.15	-1.2686
235	xbz_14130	8580.01	3658.79	-1.26696
236	xbz_6475	3956.73	9506.89	1.26467
237	xbz_29174	1688.3	4200.9	1.24894
238	he_9882	23398.2	9895.36	-1.24157
239	he_8774	1081.31	449.913	-1.24078
240	he_20374	9652.73	21967.3	1.23985
241	he_38577	1571.07	3770.5	1.23747
242	xbz_21087	7675.34	18016.3	1.231
243	he_7363	18253.1	7603.88	-1.22804
244	xbz_8613	83.1036	191.373	1.20334
245	he_9307	213.184	92.984	-1.19705
246	he_16206	115.742	50.7104	-1.19056
247	he_40953	4067.18	8739	1.18642
248	he_25704	474.956	219.879	-1.18245
249	he_29964	24448.9	10614.6	-1.18023
250	he_531	188.716	389.129	1.17755
251	he_50521	23579.6	10414.9	-1.16919
252	he_52245	23755.4	10577.8	-1.16721
253	he_21566	22228.1	10096	-1.16517
254	he_9634	33659.9	14858.4	-1.15962
255	he_13856	22863.7	10745.4	-1.15721
256	he_21880	389.087	937.998	1.15664
257	he_38575	4076.44	9372.27	1.15276
258	he_51888	21068.1	9546.89	-1.14196
259	he_53034	1748.61	4155.44	1.13765
260	he_6831	944.269	2097.52	1.12882
261	he_33220	2003.34	4441.45	1.12775
262	he_50815	23269.2	10665.4	-1.12548
263	he_44807	2016.65	4287.11	1.10858
264	he_33592	2620.61	5628.4	1.10282
265	xbz_13761	5605.93	12192.5	1.09947
266	he_8109	317.416	151.41	-1.09693
267	xbz_1241	282.326	132.322	-1.09331
268	he_20896	16631.8	8066.4	-1.09129
269	xbz_11018	1001.1	489.647	-1.08283
270	he_25099	7817.6	16552.9	1.08228
271	he_25776	12929.6	6043.79	-1.07898
272	he_6842	4127.45	8712.73	1.06041
273	he_25690	38079.8	17199.4	-1.05573
274	he_1493	1940.52	4168.71	1.05401
275	xbz_3741	4127.12	8650.53	1.0516
276	xbz_29532	317.071	682.765	1.04607
277	xbz_9235	171.222	83.1083	-1.04333
278	xbz_702	2924.52	6193.33	1.04216
279	xbz_14076	30960.8	15844.4	-1.03899
280	he_26307	9046.08	18494.8	1.02494
281	he_23346	2442.4	1207.85	-1.01169
282	he_25747	14983.6	7257.01	-1.00473
283	xbz_1728	4207.58	8440.76	0.994893
284	he_24981	1776.97	3650.02	0.987709
285	he_25668	19444.3	41211.5	0.983574
286	TU285	1950.93	1002.02	-0.974723
287	he_17153	2686.47	5323.58	0.969563
288	he_49594	221.614	403.784	0.969243
289	he_9058	792.884	408.388	-0.962046
290	he_40162	8644.68	16229.9	0.961457
291	he_4491	284.718	167.607	-0.955184
292	he_1011	650.893	332.123	-0.95381
293	he_11555	210.174	381.064	0.951874
294	he_36556	4361.24	2242.1	-0.946232
295	xbz_8207	97.0552	186.778	0.9431
296	he_34254	3703.88	1871.65	-0.939884
297	he_3332	5475.77	10722.7	0.939249
298	he_48081	13978.6	7513.45	-0.93543
299	he_5069	341.854	653.378	0.934538
300	he_2388	2255.1	1167.8	-0.922778
301	he_36832	26651.5	13803.8	-0.911238
302	he_47213	13374.4	25014.3	0.90328
303	TU56	20774.6	10725	-0.897739
304	xbz_20511	5919.42	11022.8	0.896959
305	he_53032	3834.7	7349.13	0.896875
306	he_2914	7244.73	3750.9	-0.892411
307	he_15624	322.93	573.082	0.892113
308	he_21018	555.46	302.193	-0.858608
309	xbz_27255	225.271	374.85	0.855855
310	TU452	236.051	122.669	-0.8514
311	xbz_15227	5052.21	2719.74	-0.849427
312	he_52022	453.503	854.338	0.84827
313	he_24403	6583.17	3660.79	-0.84663
314	he_7253	2816.85	1571.25	-0.842165
315	he_22725	7567.77	13561.5	0.841573
316	he_19454	2544.04	1441.6	-0.832443
317	he_52854	13028.9	22352.9	0.82724
318	he_38587	7174.94	12636.4	0.818772
319	he_51961	20012.7	33672.3	0.816057
320	he_9059	853.633	486.019	-0.812602
321	xbz_9343	316.207	583.63	0.810684
322	xbz_14049	15005.8	28234.8	0.805073
323	he_1586	17654.4	10142.2	-0.799657
324	xbz_25897	13724.7	23795.5	0.799169
325	xbz_13680	1423.75	2506.08	0.793898
326	he_20919	11422.5	20738.5	0.792008
327	xbz_11316	11827.1	20321.6	0.791522
328	he_15724	25597.9	44573.4	0.773842
329	he_48076	754.679	1268.84	0.757499
330	he_30889	11451.5	19306.3	0.75353
331	he_47515	4401.71	2870.87	-0.753452
332	he_25753	209.657	125.319	-0.744354
333	he_27875	521.886	870.802	0.738609
334	he_41333	2317.52	1357.6	-0.729895
335	xbz_26373	683.799	1127.95	0.722052
336	he_36597	323.349	538.989	0.720502
337	he_197	16277	9284.28	-0.713786
338	he_36910	47447.4	26949.4	-0.706414
339	he_50707	7942.81	12928.3	0.702816
340	xbz_29172	3938.47	6314.23	0.680972
341	he_47505	14660.4	23424.3	0.676081
342	he_28713	377.281	599.869	0.671272
343	he_47551	9959.09	15765.5	0.662686
344	xbz_27054	11748.7	7441.43	-0.658849
345	he_19455	1866.67	3011.04	0.654738
346	he_24730	488.087	310.12	-0.654309
347	xbz_13911	1035.44	1653.1	0.651739
348	he_53589	360.939	570.665	0.647601
349	he_7041	26986.2	41225.9	0.642385
350	he_23347	3015.86	1989.35	-0.641994
351	he_8778	25324.2	39466.6	0.641883
352	he_1991	40167.7	24542.8	-0.640205
353	he_21561	22664.7	36281.9	0.62969
354	he_47514	5953.44	3689.53	-0.623621
355	he_39736	5099.94	3332.65	-0.613811
356	xbz_8328	490.44	749.944	0.612706
357	he_21967	6666.98	4371.28	-0.608977
358	he_28711	933.091	1317.04	0.607166
359	xbz_14675	37151.4	24397.3	-0.606696
360	he_5651	8627.39	5522.84	-0.606132
361	he_4064	9473.14	6405.42	-0.605631
362	he_5138	16096.1	10220.5	-0.602217
363	he_9859	1008.24	674.772	-0.601451
364	he_47496	11248.2	17063.1	0.601179
365	xbz_4935	3394.96	5117.47	0.592038
366	xbz_4929	667.651	445.86	-0.5903
367	he_2348	7343.48	4645.58	-0.580405
368	xbz_24446	6474.99	9644.79	0.574872
369	xbz_27257	389.98	580.174	0.573313
370	xbz_16514	751.033	1116.39	0.571892
371	xbz_7667	576.328	856.813	0.570881
372	xbz_5348	864.013	581.777	-0.570165
373	he_9776	2438.32	1605.23	-0.567727
374	he_26540	34587.3	23698	-0.562769
375	xbz_28291	417.415	304.304	-0.562063
376	he_29970	766.73	1108.9	0.561447
377	he_35750	9997.27	6688.21	-0.559611
378	he_13939	2688.53	1933.5	-0.555747
379	xbz_25639	5001.65	3539.41	-0.551264
380	he_25409	1165.53	1664.16	0.549054
381	he_30884	15491.7	22557.7	0.547176
382	xbz_10964	450.401	653.529	0.534907
383	he_31035	37823.6	24011	-0.534553
384	he_49596	381.118	552.369	0.530615
385	xbz_15625	32940.2	21487.2	-0.53044
386	he_20939	9870.71	14249.9	0.517472
387	he_32	1820.67	1294.18	-0.515706
388	he_30695	26269.4	35344	0.514243
389	he_26246	33793.6	23561.4	-0.505316
390	he_52927	35604.5	23519.7	-0.504031
391	xbz_6473	790.893	558.03	-0.503139
392	he_43853	20804.9	28913.9	0.503011
393	xbz_20069	364.268	248.675	-0.499199
394	xbz_9572	595.469	421.195	-0.498763
395	he_38247	15272.8	20270	0.492557
396	he_36788	1366.93	1920.18	0.491222
397	xbz_998	35337.8	25281.1	-0.486192
398	he_53189	30033.1	39847.8	0.484244
399	he_45012	23856.9	34875	0.481921
400	he_9068	3732.98	5213.75	0.469411
401	xbz_22723	4369.09	6030.12	0.464854
402	he_47519	20291.8	27942	0.461537
403	he_44575	7606.38	10976.8	0.460641
404	he_37317	42773.6	28859.2	-0.46054
405	he_14423	619.969	860.549	0.460293
406	he_5126	16315.7	22157.1	0.458037
407	he_29304	12152.4	17561.7	0.456681
408	he_11181	6144.54	8728.05	0.45167
409	he_51342	2831	3868.77	0.451397
410	he_28451	32400.3	23755.1	-0.447773
411	he_12202	746.455	548.291	-0.445115
412	he_8776	28476.2	38758.6	0.44476
413	xbz_26076	11704.2	16452	0.44144
414	he_51344	852.756	1119.79	0.43347
415	he_17857	632.198	468.886	-0.432302
416	he_40343	26413.2	34615.8	0.428412
417	he_19742	33911.8	26036.3	-0.420291
418	he_18278	34191.5	27091.9	-0.412433
419	xbz_14154	1841.24	1512.09	-0.403559
420	he_13555	18223.9	24565.3	0.394452
421	xbz_28242	842.119	1104.82	0.390138
422	he_39302	34561.3	26435.6	-0.386677
423	he_40719	26157.6	33652.8	0.386149
424	he_14017	34087.1	26383	-0.385691
425	he_48015	20244.2	15570.7	-0.378675
426	xbz_28240	2569.34	3419.94	0.377573
427	he_51418	1714.49	2220.24	0.372939
428	he_40138	10490.8	13248.4	0.365877
429	he_18225	33538.4	26753.3	-0.364718
430	he_23737	16506.4	12781.9	-0.361989
431	he_9775	5432.72	4231.47	-0.35625
432	he_20151	32428.9	25637.6	-0.352272
433	he_27218	6219.07	4574.13	-0.349358
434	he_10229	13332.4	10466.9	-0.349104
435	he_39883	33662.7	26464.6	-0.347086
436	he_28961	19505.6	24155.5	0.346351
437	xbz_7200	19384.7	24249.7	0.317706
438	he_15140	3066.9	2464.06	-0.315756
439	xbz_9265	2329.39	1876.34	-0.311932
440	he_4037	25448.8	31534.1	0.309316
441	he_36616	39010.8	31711.5	-0.307991
442	he_20936	6725.31	8885.11	0.302714
443	he_11793	2979.48	2423.38	-0.298041
444	xbz_23097	3578.32	2911.17	-0.297203
445	he_39456	9106.42	11118.7	0.288028
446	he_2975	30532.1	37199.3	0.284949
447	he_25699	12655.6	15945.8	0.283224
448	xbz_29013	24387.2	28456.7	0.275033
449	xbz_15847	33737.1	26530.1	-0.267136
450	xbz_21862	34004.2	27251.4	-0.263954
451	he_9646	32221.9	26436.1	-0.262841
452	he_42176	3446.68	2874.55	-0.260762
453	he_37337	15653.3	12380.5	-0.257049
454	xbz_11720	6976.42	8332.74	0.256305
455	xbz_26095	6642.16	5493.78	-0.25055
456	he_21649	7205.24	8559.56	0.248491
457	he_42966	2419.04	2866.13	0.24486
458	he_30566	9091.08	7444.63	-0.243834
459	he_25375	27999.8	23696.4	-0.243532
460	he_40709	22169.8	18214.3	-0.234303
461	he_29411	34339.4	29220.8	-0.232436
462	xbz_5246	33854.1	28842.6	-0.230449
463	he_28378	33968.2	29178.9	-0.218793
464	he_47874	33423.9	28823.4	-0.213638
465	he_46823	26579.5	30790.5	0.212173
466	xbz_8049	3159	2735.33	-0.209194
467	he_37854	20767.5	23827	0.197867
468	he_47546	24804.6	28267.3	0.188527
469	he_13758	28978.1	25722.3	-0.171945
470	he_27876	2500.17	2225.99	-0.168504
471	he_4609	25656.6	22829.8	-0.168409
472	he_45766	30186.2	26197.1	-0.159745
473	he_47550	23249.3	25909.7	0.15672
474	he_47558	25760.8	28687.7	0.156299
475	he_47085	32393.6	29067.5	-0.155212
476	he_47554	23353.2	25954.5	0.153515
477	he_20008	21148.4	23943.8	0.150576
478	he_2186	18495.3	16154	-0.148438
479	he_47544	26235.1	29014.8	0.145291
480	he_35611	24915.9	27493.5	0.138916
481	he_16726	22564.4	24669.7	0.128507
482	he_20968	25670.7	27976.6	0.124094
483	he_49538	22167.6	24014.9	0.116424
484	he_43686	26234.8	28385.7	0.11336
485	xbz_26118	26727.6	28740.2	0.106886
486	he_30317	27063.6	25583.4	-0.0814642
487	he_8779	18726.8	17709.9	-0.0805642
488	he_8520	27361.5	26200.2	-0.0623329

## Sheet: 检测信号值
No.	探针_ID	Sample A 平均信号值	Sample B 平均信号值
1	chr10_C_2
2	chr10_D_4	20.4505
3	chr11_A_6
4	chr11_A_7
5	chr12_D_5
6	chr13_D_6
7	chr18_B_3	21.4036
8	chr2_B_2
9	chr2_D_1
10	chr20_B_4	15.1704
11	chr6_A_4	21.0919
12	chr8_B_5
13	chr9_B_6
14	he_10021	14.3918	18.8617
15	he_10106	22.2341	22.2315
16	he_1011	658.771	329.519
17	he_1012	9033.05	10271.9
18	he_10229	14313.5	11232.3
19	he_10363	12079.4	41185.2
20	he_10364	24.9588	16.322
21	he_10527	23191.3	22358.7
22	he_10552		128.898
23	he_10636	18.9434	22.7316
24	he_11072	20.2432	18.5406
25	he_11181	6466.96	8766.28
26	he_11413	24.5439	143.295
27	he_11415	20.6614	166.762
28	he_11517		15.29
29	he_11553	40.6503	127.264
30	he_11555	205.326	391.586
31	he_11662
32	he_11733
33	he_11751	21.1167	13.0473
34	he_11793	3060.18	2446.08
35	he_12051
36	he_12052	22.1679	17.4986
37	he_12202	752.798	563.36
38	he_12203	46.1287	19.7648
39	he_12204	4563.36	11340.8
40	he_12335
41	he_12443
42	he_12546		11.8322
43	he_12588		54.332
44	he_12763
45	he_1289
46	he_129	29.7521	100.554
47	he_13009
48	he_13117	5377.37	5559.1
49	he_13183	149.016	207.53
50	he_13388	341.398	286.944
51	he_13555	19114.3	25147.6
52	he_13758	30199	26762.9
53	he_138	16.1843	38.5855
54	he_13856	23924.5	10636.9
55	he_13939	2863.32	1910.43
56	he_13993
57	he_14017	35470.1	27104.5
58	he_14115	462.076	1381.93
59	he_14144
60	he_14371	22.4007	26.2593
61	he_14382	24.8673	16.8711
62	he_14386	146.993	8043.95
63	he_14393	32.8306	1033.06
64	he_14400	17.0281	15.2121
65	he_14422		18.8183
66	he_14423	632.729	847.555
67	he_14700
68	he_1492	314.619	396.135
69	he_1493	1910.25	4057.82
70	he_15138	16.1619	72.5401
71	he_15140	2946.69	2469.49
72	he_15142	6022.76	18820.7
73	he_15155
74	he_15187
75	he_15199
76	he_15200
77	he_15201	16.088	29.7433
78	he_15370	253.773	200.364
79	he_15397	78.6713	85.2163
80	he_15398	150.463	182.617
81	he_15588	22114.8	8279.48
82	he_15616
83	he_15624	309.104	571.726
84	he_15651	8549.84	24701.6
85	he_15653	5567.26	15580.5
86	he_15724	26723.9	45643.6
87	he_1586	18663.8	10652.1
88	he_15944
89	he_15980
90	he_16205	68.1073	173.078
91	he_16206	117.155	53.4237
92	he_16289		11.4055
93	he_16347		49.3306
94	he_16349	25.4729	1804.58
95	he_1662
96	he_16687	21.0966	12.2362
97	he_16726	23671.3	25421.1
98	he_16732	17.0932
99	he_16755	5233.47	693.639
100	he_16903
101	he_17153	2637.45	5213.8
102	he_17154		16.1706
103	he_17193
104	he_17291	2125.67	1957.55
105	he_17301	21.5007
106	he_17407	44.3566	323.674
107	he_17423
108	he_17441	30.9877	2060.12
109	he_17443
110	he_17477	479.876	625.759
111	he_17478	78.1318	86.0308
112	he_17857	605.703	455.424
113	he_17916
114	he_18076	14.0481	38.6497
115	he_18129	130.96	787.212
116	he_18225	35019.9	27219.4
117	he_18278	35852.9	27266.9
118	he_18321
119	he_18422	18.2575
120	he_18466
121	he_18518	28.6795	44.6853
122	he_18545
123	he_18658
124	he_18859	25.5017
125	he_18955	25.3874	112.439
126	he_19075	38.2123	20.8364
127	he_1916
128	he_19342	15.2896
129	he_19454	2453.75	1407.88
130	he_19455	1970.16	2965.76
131	he_197	16366.8	9826.71
132	he_19742	35491.7	26670.4
133	he_19849
134	he_19909
135	he_1991	40241.3	26140.4
136	he_19925	17.8855
137	he_19980	22.0026
138	he_20008	22076.4	24482
139	he_20127		13.2568
140	he_20131		26.8495
141	he_20151	33765.6	26412.8
142	he_20180	1992.14	637.69
143	he_20181	1137.56	195.284
144	he_20265
145	he_20271	534.535	651.706
146	he_2031	24026.1	9824.74
147	he_20337	24.8567
148	he_20374	9432.21	22426.6
149	he_20375
150	he_20416	99.6793	100.411
151	he_20459		14.1749
152	he_2066	6948.14	46.5765
153	he_20697	2311.79	437.367
154	he_20870	36.3502	13.9528
155	he_20896	17287.3	8083.41
156	he_20910	16.703
157	he_20915	7056.75	2405.72
158	he_20919	11936.3	20915.7
159	he_20922	35.1601	44.049
160	he_20936	7112.02	8888.2
161	he_20939	10474.7	15019.9
162	he_20942	47.7745	26.8986
163	he_20968	26702.8	29219
164	he_21018	566.517	299.695
165	he_21059		380.087
166	he_21097
167	he_21132		17.144
168	he_21320		14.9257
169	he_21337
170	he_21527	22.1079
171	he_21561	23704.5	37129.5
172	he_21566	23302.8	10315.4
173	he_21594	184.527	894.489
174	he_21649	6975.31	8508.21
175	he_2174	597.659	112.211
176	he_2186	18812.6	17092.3
177	he_21871		442.19
178	he_21872	18.1687	333.442
179	he_21873	48.7859	1683.51
180	he_21878	881.03	3128.16
181	he_21880	401.364	930.15
182	he_21967	6932.52	4531.77
183	he_21987
184	he_22155		58.6161
185	he_22366	12.1697
186	he_22404		99.5327
187	he_22493	29.9264	15.469
188	he_22545	21.8346	61.7436
189	he_22725	7861.82	14212.1
190	he_22736	15.8943	17.9589
191	he_22761
192	he_22762
193	he_22798
194	he_22897
195	he_23031	104.754	28.9978
196	he_23198
197	he_23268		13.9671
198	he_23269	16.6552	13.9846
199	he_23346	2567.24	1257.04
200	he_23347	3152.24	2028.36
201	he_23413	9209.44	2495.23
202	he_23414
203	he_23428	26072.6	25784.3
204	he_23458	350.055	294.031
205	he_2348	7218.89	4860.8
206	he_23737	17228.3	13769.1
207	he_23832
208	he_2388	2283.63	1217.05
209	he_23954	322.161	44.9566
210	he_23994
211	he_24	37.0726	15.921
212	he_24113	1173.86	369.399
213	he_24277	17.4091	24.8228
214	he_24403	6816.01	3798.38
215	he_24664	19.6969
216	he_24677	15.4937	31.8734
217	he_24706	15.9833	11.1097
218	he_24730	533.743	323.89
219	he_24741
220	he_24757	23.068	17.8823
221	he_24920
222	he_24979	1493.34	4129.9
223	he_2498	21.0388
224	he_24981	1756.53	3522.65
225	he_25	24.6269
226	he_2502	17.983
227	he_25080	7117.65	21594
228	he_25081	5814.54	17258.2
229	he_25082	18.9537
230	he_25083	6308.31	19125.3
231	he_25084	257.313	208.857
232	he_25098	161.034	43.2575
233	he_25099	7608.16	16781.8
234	he_25100	187.728	37.6998
235	he_25101	1653.12	5416.56
236	he_25103	1585.07	3941.72
237	he_25327
238	he_25328	80.6079	75.4035
239	he_25375	29034	24631.6
240	he_25408
241	he_25409	1128.97	1666.38
242	he_25497	18.8846
243	he_25586	33.2688	244.078
244	he_25588	39.6909	204.792
245	he_25626
246	he_25668	20967.2	42264.2
247	he_25669	1583.52	160.894
248	he_25673	1474.61	357.484
249	he_25674	8384.77	920.431
250	he_25676	487.585	65.0629
251	he_25688	533.505	70.4531
252	he_25690	36577.6	17249.2
253	he_25693	40.6489	13.1346
254	he_25699	12914.7	15860.3
255	he_25704	484.24	216.654
256	he_25712	866.461	26.371
257	he_25728	14332.7	187.074
258	he_25733	7808.79	273.244
259	he_25747	14294.4	7061.57
260	he_25748	8283.24	2643.91
261	he_25753	212.121	131.71
262	he_25776	13008.7	6116.78
263	he_25777	3527.66	1391.1
264	he_25788	19.0307
265	he_25933
266	he_26079	60.879	24.4019
267	he_26080
268	he_26104	2142.24	675.649
269	he_26137	29195.1	10811.4
270	he_26153	16.1734	15.2886
271	he_26246	35726.6	23585.4
272	he_26249
273	he_26307	9502.62	18614.4
274	he_26314	27.4273	33.1802
275	he_26344
276	he_26418
277	he_26540	36123.4	23632.9
278	he_26559	110.672	98.5244
279	he_26584
280	he_26695		15.3247
281	he_26755	40.1831	67.3778
282	he_26836
283	he_27079	25.4831	97.7059
284	he_27160	17.6514
285	he_27208
286	he_27218	6036.27	4644.99
287	he_27228	30.4312	16.2278
288	he_27299
289	he_27500
290	he_27523		17.9594
291	he_27671	1501.55	1687.17
292	he_27706	25404.3	26187.8
293	he_27778
294	he_27781
295	he_27797		32.6222
296	he_27831	27.9548	36.4949
297	he_27875	493.842	878.398
298	he_27876	2500.02	2311.34
299	he_28251
300	he_28329	111.394	61.917
301	he_28378	32530.5	29249.5
302	he_28411
303	he_28451	31906.2	23707.7
304	he_28473	59.1598	16815.7
305	he_28474	223.739	25182.4
306	he_28476	142.713	8328.97
307	he_28479		23.9161
308	he_28480	263.693	8436.1
309	he_28482	169.368	13049.5
310	he_28483	17.415	140.105
311	he_28710
312	he_28711	915.767	1348.17
313	he_28712	26.8961	15.8651
314	he_28713	394.965	580.449
315	he_28825	62.4517	335.773
316	he_28827	21.4609	229.608
317	he_28866	33151.2	28930.9
318	he_28947
319	he_28948
320	he_28961	20366.6	26205.1
321	he_28969	21384.1	7829.19
322	he_29126	24581.6	26859
323	he_2914	7262.47	3913.26
324	he_29243
325	he_29253	18.7734	17.7197
326	he_29304	12853.4	17495.2
327	he_2937	62.3335	307.183
328	he_29411	32849.6	29065.1
329	he_29521	9581.06	28177.5
330	he_29580	27.1548	12.9122
331	he_29648	7755.32	6825.68
332	he_29697
333	he_2975	30871.5	37469.6
334	he_29755
335	he_29964	24116.9	10644.6
336	he_29970	750.844	1099.68
337	he_29981
338	he_30037
339	he_30086	27.4212	30.7194
340	he_30153	137.138	98.9347
341	he_30154
342	he_30220	28.0358	32.1269
343	he_30315
344	he_30317	25890.6	25396.6
345	he_30405	184.064	272.076
346	he_30566	8874.97	7482.18
347	he_30693
348	he_30695	25534.1	36495.5
349	he_30831	26610.8	28878.3
350	he_30882
351	he_30884	15135.4	22841.5
352	he_30889	11131.1	19202
353	he_30905	14877	14272.7
354	he_31014	421.565	1032.24
355	he_31018	31.2337	235.1
356	he_31019		16.518
357	he_31029	25.1368	1362.32
358	he_31030	82.6844	10619.5
359	he_31031	47.8568	1496.13
360	he_31032	87.712	6513.32
361	he_31033	23.7586	237.594
362	he_31035	37252.8	25141.4
363	he_31077	15.6229	22.9211
364	he_31201		9.08242
365	he_31220		13.4628
366	he_31221	134.242	116.733
367	he_31262
368	he_31383	20.0696	360.228
369	he_31400
370	he_3159
371	he_3161
372	he_31641	6526.36	20172.1
373	he_31698	87.5994	33.5583
374	he_31902
375	he_31915		19.3598
376	he_31933
377	he_32	1878.99	1331.91
378	he_32093
379	he_32353		683.64
380	he_32394	3555.83	9331.94
381	he_32438	24.4632	25.7002
382	he_32556
383	he_32697
384	he_32726	25524.3	24484.1
385	he_32856	17.1367	14.184
386	he_33102
387	he_33125	10888.9	935.513
388	he_33216	1493.04	1265.99
389	he_33220	1913.27	4371.91
390	he_33255	15.0998	13.2469
391	he_3332	5489.55	10429.2
392	he_33419
393	he_33463
394	he_33536
395	he_33591
396	he_33592	2640.71	5613.79
397	he_33594	55.5657	315.47
398	he_33647	26556.3	10831.4
399	he_33649	17942.8	6042.62
400	he_33719
401	he_34022
402	he_3417	21.282
403	he_34254	3670.93	1914.69
404	he_34409
405	he_34434	62.8239	117.451
406	he_3446
407	he_34693	21.8335
408	he_34734	29.2162	16.3293
409	he_35105		17.9798
410	he_35149	21.8654	16.2332
411	he_35178	23082.3	7915.38
412	he_35232	396.239	351.515
413	he_35260		15.3554
414	he_35265
415	he_35269	46.2446	188.252
416	he_35306	50.7873	47.6522
417	he_35417
418	he_35559	2143.06	525.744
419	he_35606	6687.86	2321.75
420	he_35611	24989.4	26913.8
421	he_35693	890.018	153.5
422	he_35750	9914.09	6955.69
423	he_360	19.2655	35.3424
424	he_36376	226.79	208.125
425	he_36377	36.4019	17.6706
426	he_36383	297.442	234.099
427	he_36384
428	he_365	36.3359	322.584
429	he_36506	20.353	67.7676
430	he_36507	27.5031	7.27598
431	he_36542	112.234	36.7476
432	he_36543	11844	3974.58
433	he_36553	132.942	117.84
434	he_36556	4320.6	2355.56
435	he_36560	20.0358
436	he_36597	356.528	552.637
437	he_36616	38999.4	31064.5
438	he_36635	22.6386
439	he_36649	43.2978	74.624
440	he_36661	115.291	119.587
441	he_36697	5914.38	963.62
442	he_36724
443	he_36788	1330.18	1888.62
444	he_36832	26283.6	13713.8
445	he_36840	41.2934	14.399
446	he_36910	46861.1	27449
447	he_36935
448	he_3702	50.308	71.9944
449	he_37052	41.8209	30.6529
450	he_37061	19.8192	9.03437
451	he_37062	304.021	223.702
452	he_3720	32.543	22.0778
453	he_37317	42319.9	29233.3
454	he_37337	15506	12672
455	he_37488	57.9524	18.6911
456	he_37705
457	he_37784
458	he_37851	29474.6	10174.8
459	he_37854	21182.9	23177.2
460	he_37871	19391.7	7581.55
461	he_37889	111.411	3082.68
462	he_37892	71.9024	652.907
463	he_37964	27.1609
464	he_38045
465	he_38204	73.2858	339.505
466	he_38247	15015.4	20470.6
467	he_383	35.1348	41.7809
468	he_38328	37.3401	42.9443
469	he_38407	1705.37	4958.55
470	he_38408	45.6324	13.6495
471	he_38409	6257.41	15132.7
472	he_38410	93.0214	28.4162
473	he_38547	16.8299	28.3079
474	he_38575	4185.67	9339.23
475	he_38577	1585.86	3758.06
476	he_38583	3377.09	3196.87
477	he_38587	7523.25	13356.4
478	he_38706
479	he_38779	490.025	114.406
480	he_38783	27.3331	28.1285
481	he_38877
482	he_38881	1233.88	46.2342
483	he_38904	19387.3	19014.9
484	he_39032	15.5885	15.5847
485	he_39049	13.0248
486	he_39085
487	he_3909
488	he_39224	17.2674	36.9146
489	he_39302	34881.1	27034.3
490	he_39410
491	he_39456	9370.11	11700.6
492	he_39482		9.19723
493	he_39499
494	he_39736	5092.08	3414.41
495	he_39883	33965	27731.5
496	he_4000	26.444
497	he_40110	22308.7	22053.8
498	he_40138	10663.1	14095.6
499	he_40142	2080.09	6905.38
500	he_40162	8678.36	17359.4
501	he_40174	1563.37	5315.24
502	he_40343	26423.3	36810.9
503	he_4037	25796.1	31977.3
504	he_40557
505	he_4064	9683.17	6342.87
506	he_40709	22387.1	19307.1
507	he_40719	26424.4	35898
508	he_40784
509	he_40953	4120.05	9244.17
510	he_40976	46.0759	97.0697
511	he_41025
512	he_41210	21543.4	6473.44
513	he_41230
514	he_41259	21808.1	9009.99
515	he_41264	38.5909	187.757
516	he_41333	2360.11	1415.28
517	he_41343	47.4775	33.1542
518	he_41344	17.8169	416.009
519	he_41514	23.5172	25.7841
520	he_41519	25.2166	29.096
521	he_41735	492.219	2009.25
522	he_4179
523	he_41842	18.0581
524	he_41925	21.5483
525	he_41985
526	he_4201	44.2506	159.158
527	he_42040	30.4102	19.0819
528	he_42138	19.6988
529	he_42176	3340.9	2930.81
530	he_42208	21.8352	13.0945
531	he_42309	24.4397	29.3563
532	he_42311	40.4577	168.792
533	he_42318		214.129
534	he_42327
535	he_4234	5727.53	2325.19
536	he_42549	227.545	55.8519
537	he_42703		10.216
538	he_42966	2351.01	2718.83
539	he_43060	2543.57	8533.15
540	he_43348	20525	21248.8
541	he_43505
542	he_43686	26168.7	27635.4
543	he_43839
544	he_43853	21021.7	29998.4
545	he_43858
546	he_43902
547	he_44031	43.7279	36.964
548	he_44348		14.2217
549	he_44379	15137.9	5336.58
550	he_444	6739.04	7175.52
551	he_44491
552	he_44575	7635.7	10710.1
553	he_44769	17.8543	14.2258
554	he_44774	13.9417
555	he_44807	2014.85	4364.24
556	he_4491	320.862	162.441
557	he_44968	26.1209	76.5976
558	he_45012	25344	34574.1
559	he_45339
560	he_45492
561	he_45540
562	he_45766	30418.9	27197.1
563	he_4580	18.5321
564	he_45964	12.1605	22.0656
565	he_46026	24.7084	7.16203
566	he_46034	21462	8620.36
567	he_46082
568	he_4609	26137	22929.3
569	he_46242	16853	2220.32
570	he_46244
571	he_4625	37.2612	28.0484
572	he_46260	20.558
573	he_46408	5038.45	1004.1
574	he_46690	19.5725	21.3416
575	he_46744	57.281	749.575
576	he_46823	26739.9	30823
577	he_46887	352.756	359.006
578	he_47036	717.006	848.77
579	he_47085	31199.8	28669.9
580	he_47198	16.2955
581	he_47213	13507.5	25026
582	he_4723	3814.3	11715.4
583	he_47473	12.9404
584	he_47479	4843.65	4218.07
585	he_47496	11459.5	16966.5
586	he_47498	14956.3	15004.6
587	he_47500
588	he_47505	14756.6	23371.6
589	he_47509		18.0068
590	he_47514	6068.02	3735.07
591	he_47515	4651.18	2832.75
592	he_47519	20387.2	28234.7
593	he_47535	3621.25	1289.75
594	he_47544	26425.1	29343.9
595	he_47546	24949.7	28570.6
596	he_47550	24333.6	26359.2
597	he_47551	10096.4	15593.3
598	he_47552	26288.3	25967.8
599	he_47554	24374.6	26411.2
600	he_47558	26902.7	29351.8
601	he_47874	33510.1	28756.3
602	he_48015	20453.9	15757.3
603	he_48071	16.5798	21.7553
604	he_48075	306.816	297.898
605	he_48076	718.109	1270.7
606	he_48081	13928.5	7588.36
607	he_48162
608	he_4830	1843.04	1237.93
609	he_48324
610	he_48741	17.9278
611	he_48746	19.0547	27.6526
612	he_48827	29.4815	26.3656
613	he_48829	22.6847	22.0728
614	he_48830	31.5579	43.3925
615	he_48880	14.9423
616	he_48881		19.2534
617	he_4902	268.233	65.0926
618	he_49215
619	he_4926
620	he_4927	34.2757	13.9146
621	he_4928	28.7055
622	he_49310
623	he_49313
624	he_49538	23057.2	24495.2
625	he_49591	27.2049
626	he_49593	22.0986	22.4217
627	he_49594	217.946	407.002
628	he_49595	79.817	102.752
629	he_49596	398.793	557.78
630	he_4967	27101.3	9075.02
631	he_49808	1296.23	1477.85
632	he_49811
633	he_49813	516.441	534.926
634	he_49836	1580.91	5687.08
635	he_49837
636	he_49840	683.892	93.9258
637	he_5002	36.0944	12.0125
638	he_50065	11365.6	3587.86
639	he_50188
640	he_50197
641	he_50222	12.5932
642	he_50323	1320.73	1458.64
643	he_50521	23682.2	10374
644	he_50564	20.9602
645	he_5069	343.147	658.842
646	he_50707	8111.51	13035.1
647	he_50723	23432.2	4645.64
648	he_50815	23611.6	10494.7
649	he_51088		48.1003
650	he_51253
651	he_5126	16342.2	21924.4
652	he_51341		17.7614
653	he_51342	2725.67	3794.24
654	he_51344	845.503	1115.08
655	he_51356	411.152	330.927
656	he_5138	15834.9	10300.6
657	he_51417	304.404	269.433
658	he_51418	1652.92	2212.34
659	he_51658
660	he_51754
661	he_51788	24.3013	124.322
662	he_51829	47.69	37.5722
663	he_51830	26.2694	41.0658
664	he_51888	21206.4	9478.78
665	he_51914
666	he_51961	20077.2	34982
667	he_51982	24.4114	15.9371
668	he_51983	62.5574	173.615
669	he_52010	59.347	123.914
670	he_52022	504.998	874.524
671	he_52065		63.698
672	he_52106	8720.6	8395.52
673	he_5221	323.804	34.8672
674	he_52217		16.0407
675	he_52218
676	he_52245	23942.2	10640.7
677	he_5226	27.9336	35.7032
678	he_52487	17.0702	14.9009
679	he_52673	31.5074	61.9442
680	he_52701	1933.89	445.047
681	he_52722	3574.72	221.929
682	he_52733	109.489	79.1535
683	he_52751	43.7717	11.3014
684	he_52821	20.8207	14.9488
685	he_52822	46.5631	18.6501
686	he_52827	40.4732	29.1557
687	he_52854	13071.7	22954.1
688	he_52875
689	he_52908
690	he_52910	32615.3	32435.8
691	he_52927	35767	25359.4
692	he_52967
693	he_53032	3788.31	7162.93
694	he_53033	67.5569	56.2389
695	he_53034	1767.81	4045.2
696	he_53035	40.7044	12.9387
697	he_531	183.89	411.863
698	he_53109	1546.11	1732.41
699	he_53133	6257.05	18712.5
700	he_53164	16.5308
701	he_53189	30159.7	42866.6
702	he_532	85.2353	101.733
703	he_53228
704	he_53229		11.7429
705	he_53230	81.9239	137.681
706	he_53232
707	he_53233	17.7934
708	he_53286	20.7193	19.8869
709	he_53287	847.703	760.59
710	he_53370
711	he_53444
712	he_5346	6059.52	6034.96
713	he_53507
714	he_53509
715	he_53513	77.1071	80.8721
716	he_53515	60.9092	33.4445
717	he_53516		9.43915
718	he_53548	23.8425	28.7268
719	he_53549	21.8891	25.6786
720	he_53589	352.129	576.98
721	he_53591	17.5708	36.7851
722	he_540
723	he_5403	137.799	44.9995
724	he_5625
725	he_5626		28.9433
726	he_5651	8650.69	5533.18
727	he_5721
728	he_5727	2664.81	9345.78
729	he_5849
730	he_593	90.2846	1374.26
731	he_596	31.5471	427.317
732	he_597
733	he_598	31.3044	244.869
734	he_6004
735	he_6014
736	he_6015	99.2378	66.4366
737	he_6041	40278.6	37263.9
738	he_6383
739	he_6498	28.7327
740	he_6625
741	he_6656	26.7388
742	he_6808	38.9055	10.2955
743	he_6831	924.127	2122.14
744	he_6832
745	he_6833	29.588	60.6966
746	he_6834	20.001	18.2665
747	he_6835	56.4026	54.7688
748	he_6836	668.702	1804.79
749	he_6837
750	he_6841	70.3952	15.8916
751	he_6842	4066.54	8733.74
752	he_7005		13.7248
753	he_7041	28058.1	41321.8
754	he_7043	19732.3	19931.5
755	he_7044
756	he_7061	20.9807	14.0226
757	he_7169
758	he_7253	2864.95	1600.57
759	he_7363	18659.5	7929.23
760	he_753
761	he_7624
762	he_7788
763	he_7822	53.8136	25.8298
764	he_810	17.7915	43.1738
765	he_8109	347.437	157.411
766	he_8209	982.825	321.362
767	he_8384
768	he_8487	15.4473
769	he_8520	26823.5	25745.1
770	he_8535	30.8618	48.4
771	he_8569	39.2218	122.709
772	he_8749
773	he_8774	1133.81	471.61
774	he_8776	29534.6	40587.8
775	he_8778	26110.8	42501.9
776	he_8779	19618	19177.8
777	he_8797
778	he_8861		19.1272
779	he_8862	26.6937	37.9192
780	he_9036		15.2484
781	he_9047	1440.42	1416.29
782	he_9049	12197.9	14127.2
783	he_9053	1042.25	967.437
784	he_9058	827.512	424.523
785	he_9059	849.897	473.281
786	he_9068	3614.69	5150.42
787	he_9090	596.34	2460.83
788	he_9307	199.466	91.3441
789	he_9463	159.135	6837.64
790	he_9626		35.4538
791	he_9627	38.5379	49.5638
792	he_9634	34998.8	16123.8
793	he_9637	108.672	107.584
794	he_9638	64.5484	19.6177
795	he_9646	33303.7	28556.4
796	he_9720		3341.57
797	he_9721	59.2433	5982.99
798	he_9772	1523.49	3919.91
799	he_9775	5671.06	4432
800	he_9776	2506.3	1679.4
801	he_981	110.447	5156.5
802	he_983
803	he_9859	1037.76	684.698
804	he_9860	209.355	133.064
805	he_9882	24384	10350.8
806	he_9903	61.4841	72.6176
807	he_9904	28.3427
808	rt_chr1_A_1
809	rt_chr1_A_1_host	25.3087
810	rt_chr1_C_1	38.3065	15.2154
811	rt_chr1_C_1_host
812	rt_chr1_G_1
813	rt_chr13_E_2	16.6772
814	rt_chr13_E_2_host
815	rt_chr16_B_7
816	rt_chr2_B_1
817	rt_chr2_D_2
818	rt_chr2_D_3	34.2892
819	rt_chr3_A_2
820	rt_chr3_E_1
821	rt_chr4_A_3
822	rt_chr6_A_5
823	rt_chr9_F_1
824	TU1
825	TU100,TU232	56.6845	22.7882
826	TU105
827	TU107
828	TU108
829	TU119
830	TU12
831	TU126_1	158.47	32.6506
832	TU139
833	TU145
834	TU16
835	TU160
836	TU161
837	TU184
838	TU194
839	TU195
840	TU20
841	TU206	359.532	51.3179
842	TU208
843	TU219
844	TU22
845	TU230
846	TU231
847	TU235
848	TU239
849	TU24
850	TU241
851	TU242
852	TU244
853	TU254
854	TU258
855	TU260
856	TU261
857	TU263
858	TU283
859	TU285	2141.81	1065.24
860	TU303
861	TU308
862	TU311
863	TU313
864	TU315	2054.76	303.105
865	TU319	21.9546
866	TU327	211.842	40.193
867	TU357	22.3147
868	TU368	22.7121
869	TU371	1186.63	101.563
870	TU384	16.2105
871	TU386	24.6406
872	TU387	20.1813
873	TU398	51.0523	32.6237
874	TU399	15.8227
875	TU4
876	TU416	66.8036	35.1183
877	TU421	24.287
878	TU43	38.6741	17.3794
879	TU431	22.8535
880	TU433	38.9715	11.749
881	TU442	31.8038
882	TU448	64.5204	36.1429
883	TU452	254.572	138.619
884	TU465	20.511
885	TU471	20.4081
886	TU481	26.6307
887	TU498	21.6897
888	TU499	33.4661
889	TU500	30.4223	11.5716
890	TU513	23.6749
891	TU531
892	TU540
893	TU541
894	TU556
895	TU558
896	TU56	20580.6	10684.7
897	TU583
898	TU589
899	TU600	925.824	220.179
900	TU605
901	TU625
902	TU655
903	TU66
904	TU668
905	TU675
906	TU680
907	TU681
908	TU691
909	TU692
910	TU693
911	TU694
912	TU71
913	TU757	168.928	25.2165
914	TU777
915	TU778
916	TU779
917	TU780	20.4774
918	TU782	19.7627	22.8492
919	TU788
920	TU79	1272.69	263.585
921	TU791	19.7764
922	TU801	14.0778
923	TU809	34.2504	18.1139
924	TU819
925	TU821	14.9723
926	TU828	16.8361
927	TU830	15.5517
928	TU831	32.3234
929	xbz_1041	6002.72	37.6375
930	xbz_10531
931	xbz_10532	229.37	312.673
932	xbz_10770	23.4603
933	xbz_10778
934	xbz_10910	102.984	33.2892
935	xbz_10955	31.0945
936	xbz_10964	475.037	641.19
937	xbz_11018	1018	479.422
938	xbz_11034	7503.99	19242.5
939	xbz_11312
940	xbz_11316	11823.5	20363
941	xbz_11338
942	xbz_11341
943	xbz_11369	544.338	429.487
944	xbz_11501		15.6196
945	xbz_11688	781.741	178.554
946	xbz_11720	6994.3	8384.1
947	xbz_11894	1673.35	4679.01
948	xbz_12
949	xbz_12156
950	xbz_1241	283.592	136.895
951	xbz_12421	18.269
952	xbz_12440
953	xbz_12465
954	xbz_12548	34776	6675.32
955	xbz_12703
956	xbz_12704
957	xbz_12775	11307.9	2405.69
958	xbz_12781	23974.7	25783.5
959	xbz_12807	19.9527
960	xbz_12959	25.3289	18.6769
961	xbz_13260	25.1424
962	xbz_13594	15.5591	7.63295
963	xbz_13679	26.1869	41.5941
964	xbz_13680	1375.64	2527.89
965	xbz_13753	7118.37	21310.5
966	xbz_13754	5794.22	17130.7
967	xbz_13756	5898.9	18521.8
968	xbz_13757	115.768	153.541
969	xbz_13760	125.62	44.242
970	xbz_13761	5527.95	12377.6
971	xbz_13762	118.613	37.4155
972	xbz_13763	1268.88	4254.83
973	xbz_13765	1568.25	3940.72
974	xbz_13870		15.042
975	xbz_13871	41.4211	55.989
976	xbz_1388
977	xbz_13910	14.4805	15.3309
978	xbz_13911	1032.94	1625.37
979	xbz_14020
980	xbz_14021	14.4685	48.2271
981	xbz_14049	16284.6	28661.2
982	xbz_14050	353.216	69.93
983	xbz_14070	520.02	138.941
984	xbz_14076	33036.5	16169.5
985	xbz_14109
986	xbz_14113	6139.57	257.313
987	xbz_14128	21739.5	5463.25
988	xbz_14129	11806.8	3142.52
989	xbz_14130	9182.58	3762.1
990	xbz_14154	1997	1510.13
991	xbz_14172	19.6916
992	xbz_14453
993	xbz_14505
994	xbz_14512	17.6535	27.7313
995	xbz_14635
996	xbz_14675	36486.3	24751.6
997	xbz_14983	8527.95	26934.4
998	xbz_15144
999	xbz_15227	5048.8	2744.91
1000	xbz_15625	32546.3	22277.4
1001	xbz_15773
1002	xbz_15774	16.9072
1003	xbz_15821	31.6903	290.174
1004	xbz_15823		239.669
1005	xbz_15847	33234.4	27329.9
1006	xbz_16208
1007	xbz_16233	8470.54	26339.2
1008	xbz_16439
1009	xbz_16514	745.213	1127.45
1010	xbz_16561
1011	xbz_16594	32.0559	22.4355
1012	xbz_16624	184.744	155.015
1013	xbz_16788	161.711	271.426
1014	xbz_16911
1015	xbz_17038	26932.7	27642.5
1016	xbz_17152	16.7452
1017	xbz_1728	4250.65	8624.82
1018	xbz_17281
1019	xbz_17454	7749.85	22287.4
1020	xbz_1805
1021	xbz_18521	38.1232	319.488
1022	xbz_1853
1023	xbz_18744
1024	xbz_19	39899.5	15429.4
1025	xbz_19125
1026	xbz_19497
1027	xbz_19551
1028	xbz_19721	570.777	120.958
1029	xbz_19786
1030	xbz_20066	201.831	197.146
1031	xbz_20067		21.2929
1032	xbz_20069	366.96	251.049
1033	xbz_20070
1034	xbz_20113
1035	xbz_20200
1036	xbz_20219	5029.6	927.608
1037	xbz_20363	15.6033	22.7301
1038	xbz_20369	20.5826
1039	xbz_20370	253.663	211.429
1040	xbz_20511	5971.14	11710
1041	xbz_21085	1386.41	4584.54
1042	xbz_21086	21.2014
1043	xbz_21087	7644.63	17222.2
1044	xbz_21088	62.6414	19.3087
1045	xbz_21134		27.2912
1046	xbz_21235
1047	xbz_21267		17.9716
1048	xbz_21465	16.2181	36.2231
1049	xbz_2177	56.9393	166.906
1050	xbz_21862	33521.8	27867.3
1051	xbz_22723	4275.91	6098.01
1052	xbz_22825	433.843	2136.38
1053	xbz_2283	141.843	84.1152
1054	xbz_23022	48.9883	22.7747
1055	xbz_23097	3490.03	2922.21
1056	xbz_23158
1057	xbz_2329	17.655
1058	xbz_23504	1903.25	2324.27
1059	xbz_23536	2083.52	7748.09
1060	xbz_23885	33.922	15.3557
1061	xbz_23915	26252.7	27151.2
1062	xbz_23920
1063	xbz_24015
1064	xbz_24446	6540.65	9907.57
1065	xbz_24742
1066	xbz_250	154.403	426.586
1067	xbz_251	37.9602	71.7963
1068	xbz_2530		10.935
1069	xbz_25639	5054	3504.09
1070	xbz_25711	279.484	356.36
1071	xbz_258	34.4411	22.0822
1072	xbz_25884
1073	xbz_25897	13555.5	24080.2
1074	xbz_26076	11639.1	16402
1075	xbz_26095	6758.39	5671.54
1076	xbz_26118	26893.1	28167.7
1077	xbz_26123	25584.8	25699.9
1078	xbz_26125	26109.1	24813.8
1079	xbz_26127	24674.2	25468.8
1080	xbz_26134
1081	xbz_26370	19.9043	28.8035
1082	xbz_26372	252.516	260.038
1083	xbz_26373	664.913	1180.04
1084	xbz_2650	8572.12	8695.05
1085	xbz_26760
1086	xbz_26816		15.5997
1087	xbz_26844		26.0378
1088	xbz_26952
1089	xbz_27054	11993.5	7917.95
1090	xbz_27158
1091	xbz_2724	476.864	38.3752
1092	xbz_27253	65.1989	24.3786
1093	xbz_27255	221.635	386.722
1094	xbz_27256	68.4334	88.7974
1095	xbz_27257	389.69	556.805
1096	xbz_27387	456.115	595.899
1097	xbz_27388
1098	xbz_27389
1099	xbz_27398	1549.02	5499.05
1100	xbz_27399
1101	xbz_27400	621.559	68.2426
1102	xbz_27606
1103	xbz_27642	1374.98	1584.85
1104	xbz_27866	5310.61	5520.15
1105	xbz_28039
1106	xbz_28160	18.7044
1107	xbz_28239		11.9182
1108	xbz_28240	2588.18	3481.23
1109	xbz_28242	876.348	1106.25
1110	xbz_28291	427.429	295.309
1111	xbz_28567
1112	xbz_28632	7378.25	18892
1113	xbz_28720
1114	xbz_28951	3653.2	241.621
1115	xbz_29013	24710.4	29437.7
1116	xbz_29172	3909.87	6498.32
1117	xbz_29173	23.6252	18.1092
1118	xbz_29174	1688.19	4135.77
1119	xbz_29215	6171.22	18249.5
1120	xbz_29276
1121	xbz_29277
1122	xbz_29278	164.449	177.111
1123	xbz_29280
1124	xbz_29281
1125	xbz_29314	588.929	587.102
1126	xbz_29476	59.3778	86.8937
1127	xbz_29477	48.7116	34.3749
1128	xbz_29478
1129	xbz_29532	327.219	675.401
1130	xbz_29533		36.4156
1131	xbz_2993		30.0405
1132	xbz_3026	2405.21	8797.08
1133	xbz_3163
1134	xbz_3169	58.9507	73.6416
1135	xbz_3182	30601.5	31706.4
1136	xbz_3197
1137	xbz_3606
1138	xbz_3731	719.06	1977.66
1139	xbz_3732
1140	xbz_3733	20.2428	72.0023
1141	xbz_3737	695.636	1832.91
1142	xbz_3738
1143	xbz_3740	70.2996
1144	xbz_3741	4076.18	8624.24
1145	xbz_3757
1146	xbz_4272		25.9801
1147	xbz_4623	26367	26122.3
1148	xbz_4627
1149	xbz_4638	20.8598	55.3133
1150	xbz_4815		17.4103
1151	xbz_4920	8915.67	11107.3
1152	xbz_4929	700.073	458.948
1153	xbz_4935	3393.87	5119.48
1154	xbz_5066	93.6038	64.4167
1155	xbz_5128
1156	xbz_5186	5834.84	6499.72
1157	xbz_5246	32335.9	28799.6
1158	xbz_5256		10.6821
1159	xbz_5348	900.063	607.25
1160	xbz_5349	185.515	124.947
1161	xbz_5371	51.1789	65.2969
1162	xbz_5579	10076.4	33344.5
1163	xbz_5580		11.3124
1164	xbz_5978	31.8336
1165	xbz_6201	110.719	328.088
1166	xbz_630
1167	xbz_6473	802.41	564.64
1168	xbz_6475	3817.31	9725.16
1169	xbz_6871
1170	xbz_701	122.461	226.663
1171	xbz_702	2916.18	6223.91
1172	xbz_7110	228.379	248.914
1173	xbz_7200	19121.3	24409
1174	xbz_73		30.4845
1175	xbz_7466	19.7375
1176	xbz_7517	399.4	1343.87
1177	xbz_7538
1178	xbz_7657
1179	xbz_7667	601.905	830.934
1180	xbz_78		31.9054
1181	xbz_785
1182	xbz_8049	3139.36	2761.49
1183	xbz_8050	6072.51	18830
1184	xbz_8189	245.285	195.222
1185	xbz_8207	93.3108	188.215
1186	xbz_8230
1187	xbz_8237
1188	xbz_8315
1189	xbz_8328	517.219	784.737
1190	xbz_8337	7266.16	22766.3
1191	xbz_8338	5374.86	15374
1192	xbz_8613	84.6565	186.761
1193	xbz_8644	4347.17	1455.73
1194	xbz_865
1195	xbz_8656	272.047	74.4622
1196	xbz_8692
1197	xbz_8696	48.628	28.9306
1198	xbz_8958	5154.4	672.993
1199	xbz_9202
1200	xbz_9235	168.753	84.7144
1201	xbz_9265	2259.82	1911.29
1202	xbz_9334		22.538
1203	xbz_9343	329.768	578.31
1204	xbz_9344	63.0791	85.7247
1205	xbz_9572	577.183	422.366
1206	xbz_9673	26.1958
1207	xbz_9755	15.2479
1208	xbz_9862
1209	xbz_998	34742.3	25461

## Sheet: 原始数据
					Sample A		Sample B
索引	探针_ID	目标_序列	行	列	信号强度 (平均){A}	信号强度 (标准偏差) {A}	信号强度 (平均){A}	信号强度(标准偏差) {A}	所在组	所在组型	说明
1	empty		1	1	106.759	7.85008	30.3889	1.97571	control	control_empty
2	xbz_29276	AUCAACAGACAUUAAUUGGGCG	1	2	124.435	9.47231	36.0926	3.616	experimental
3	he_12335	UAUCUAUUACACUGAUGUUGAC	1	3	112.417	8.45673	30.8796	2.05403	experimental
4	xbz_12548	CGCCUAGUGGUUAGGAUUUGGCG	1	4	37278.9	691.123	6876.59	110.093	experimental
5	he_53032	AGCUACAUUGUCUGCUGGGUUU	1	5	3493.87	52.7734	8746.46	197.001	experimental
6	he_24981	CUAAACCAUUCGUAGACGACCUG	1	6	1616.73	31.7954	4318.1	110.801	experimental
7	he_38328	GCCCGGUGAUGACCAAGGCUGAGGGGA	1	7	143.454	10.0321	64.1389	6.56735	experimental
8	he_7005	GACGCUGAAGCCUCUUGCUAAUGAUGGC	1	8	120.713	8.03503	35.7685	2.73642	experimental
9	he_26246	UCCUGUGGUCUAGUGGUUAGGAUUCUG	1	9	36685	244.059	22025.7	663.859	experimental
10	he_45012	GCAUUGGUUGUUCAGUGGUAGAAUUC	1	10	25909.8	273.277	30835.5	832.483	experimental
11	empty		1	11	102.731	7.60915	32.5	2.59943	control	control_empty
12	xbz_29276	AUCAACAGACAUUAAUUGGGCG	1	12	118.046	4.97542	39.7037	2.90104	experimental
13	he_12335	UAUCUAUUACACUGAUGUUGAC	1	13	107.519	5.24089	33.4815	2.15511	experimental
14	xbz_12548	CGCCUAGUGGUUAGGAUUUGGCG	1	14	32304.8	400.417	6354.15	300.894	experimental
15	he_53032	AGCUACAUUGUCUGCUGGGUUU	1	15	3233.93	48.3449	7396.97	124.815	experimental
16	he_24981	CUAAACCAUUCGUAGACGACCUG	1	16	1479.33	66.5375	3863.72	74.9432	experimental
17	he_38328	GCCCGGUGAUGACCAAGGCUGAGGGGA	1	17	156.944	9.49455	68.2037	8.32153	experimental
18	he_7005	GACGCUGAAGCCUCUUGCUAAUGAUGGC	1	18	121.204	9.60798	39.5741	2.87823	experimental
19	he_26246	UCCUGUGGUCUAGUGGUUAGGAUUCUG	1	19	36073.7	436.332	21832.1	630.015	experimental
20	he_45012	GCAUUGGUUGUUCAGUGGUAGAAUUC	1	20	25168.2	204.201	32242.6	718.7	experimental
21	empty		1	21	97.713	7.60478	32.2222	1.88617	control	control_empty
22	xbz_29276	AUCAACAGACAUUAAUUGGGCG	1	22	118.611	9.52207	36.9815	4.57131	experimental
23	he_12335	UAUCUAUUACACUGAUGUUGAC	1	23	109.306	5.38856	32.1667	1.45653	experimental
24	xbz_12548	CGCCUAGUGGUUAGGAUUUGGCG	1	24	35398.4	445.742	6824.01	209.92	experimental
25	he_53032	AGCUACAUUGUCUGCUGGGUUU	1	25	3589.06	75.7116	8353.38	172.515	experimental
26	he_24981	CUAAACCAUUCGUAGACGACCUG	1	26	1687.06	54.9279	4368.45	126.098	experimental
27	he_38328	GCCCGGUGAUGACCAAGGCUGAGGGGA	1	27	152.37	8.78996	62.0463	9.51082	experimental
28	he_7005	GACGCUGAAGCCUCUUGCUAAUGAUGGC	1	28	132.111	6.57712	37.1111	2.13267	experimental
29	he_26246	UCCUGUGGUCUAGUGGUUAGGAUUCUG	1	29	43926.3	289.528	21434.2	308.015	experimental
30	he_45012	GCAUUGGUUGUUCAGUGGUAGAAUUC	1	30	32003.3	199.62	32358.2	502.372	experimental
31	empty		1	31	117.926	6.53346	31.3981	1.87427	control	control_empty
32	PUC2PM		2	1	13087	207.673	21318.7	242.458	control	control_spike-calibration	LC Internal Use
33	xbz_16208	AAAGCAUAGAUUCUAAGCU	2	2	118.009	7.92429	31.787	2.92604	experimental
34	he_18658	AUGGUUCCUGUUCUUAAAGAUG	2	3	116.676	6.09094	32.4907	2.26924	experimental
35	xbz_4935	UGCCUGUCUGAGCGUCGCU	2	4	3301.58	72.9683	6633.01	157.28	experimental
36	he_43839	UUAGCUAGUAGUUGUACAGUUU	2	5	112.546	11.6044	33.1481	3.10506	experimental
37	he_12546	UAGCAGAUCUGAUAUUGGUUA	2	6	115.111	5.5809	34.7963	2.11253	experimental
38	he_38575	AAUGUAGGUAAGGGAAAUCAGCAAGC	2	7	3764.79	100.968	10466.9	309.407	experimental
39	he_7041	GGCUCGUUGGUCUAGUGGUAUGAUUCUC	2	8	29965.8	289.727	38635.9	1251.31	experimental
40	he_26249	CAGAGAAUGUUUAAAUUAGAUGCUUA	2	9	117.222	5.97555	35.4444	3.32741	experimental
41	he_40784	AUUAAAAUGGCUAAAAAAUUUAAUUUA	2	10	113.926	6.25577	35.0278	1.8058	experimental
42	PUC2PM		2	11	11204.7	147.21	20588.6	468.775	control	control_spike-calibration	LC Internal Use
43	xbz_16208	AAAGCAUAGAUUCUAAGCU	2	12	106.759	4.81406	34.9167	2.5214	experimental
44	he_18658	AUGGUUCCUGUUCUUAAAGAUG	2	13	108.426	5.99876	34.6759	2.45265	experimental
45	xbz_4935	UGCCUGUCUGAGCGUCGCU	2	14	2786.15	66.28	5249.01	104.163	experimental
46	he_43839	UUAGCUAGUAGUUGUACAGUUU	2	15	105.102	5.06396	35.3241	1.9992	experimental
47	he_12546	UAGCAGAUCUGAUAUUGGUUA	2	16	109.13	4.22297	36.6481	1.40303	experimental
48	he_38575	AAUGUAGGUAAGGGAAAUCAGCAAGC	2	17	3685.69	80.2471	9987.4	312.871	experimental
49	he_7041	GGCUCGUUGGUCUAGUGGUAUGAUUCUC	2	18	29229	263.469	37417.1	898.678	experimental
50	he_26249	CAGAGAAUGUUUAAAUUAGAUGCUUA	2	19	106.694	6.89231	36.287	2.1489	experimental
51	he_40784	AUUAAAAUGGCUAAAAAAUUUAAUUUA	2	20	104.759	7.44434	34.6944	2.97798	experimental
52	PUC2PM		2	21	11171.7	160.577	22139.2	491.276	control	control_spike-calibration	LC Internal Use
53	xbz_16208	AAAGCAUAGAUUCUAAGCU	2	22	104.13	7.3435	33.7593	3.23205	experimental
54	he_18658	AUGGUUCCUGUUCUUAAAGAUG	2	23	106.5	4.96436	34.1389	2.90812	experimental
55	xbz_4935	UGCCUGUCUGAGCGUCGCU	2	24	3050.93	73.0811	5933.69	136.447	experimental
56	he_43839	UUAGCUAGUAGUUGUACAGUUU	2	25	110.88	5.40287	33.0741	2.04027	experimental
57	he_12546	UAGCAGAUCUGAUAUUGGUUA	2	26	117.917	7.36768	33.3426	3.46724	experimental
58	he_38575	AAUGUAGGUAAGGGAAAUCAGCAAGC	2	27	4156.22	97.6264	10790.6	160.969	experimental
59	he_7041	GGCUCGUUGGUCUAGUGGUAUGAUUCUC	2	28	34298.4	251.159	36050.7	217.983	experimental
60	he_26249	CAGAGAAUGUUUAAAUUAGAUGCUUA	2	29	123.065	8.55469	36.1204	3.76337	experimental
61	he_40784	AUUAAAAUGGCUAAAAAAUUUAAUUUA	2	30	127.306	5.09436	35.6759	2.95394	experimental
62	PUC2PM		2	31	13880.5	226.19	22954.9	486.701	control	control_spike-calibration	LC Internal Use
63	PUC2MM		3	1	11920.5	180.411	19036.5	294.618	control	control_spike-calibration	LC Internal Use
64	xbz_22825	UGAGGUAGUAGUUUGUGUCUU	3	2	467.037	33.5899	2701.47	91.517	experimental
65	he_4201	CAGUGCAAUGUUAAAAGGGCAU	3	3	157.917	8.9809	200.843	14.8602	experimental
66	xbz_14020	CAUUAUUACUUUUGGUACGCG	3	4	116.37	7.9644	31.8148	1.84009	experimental
67	he_51914	UAGUUAUCAGACUGAUGUUUAA	3	5	115.463	8.24103	32.8611	2.64913	experimental
68	he_25101	UUCACAGUGGCUAAGUUCUGC	3	6	1553.48	66.6053	6567.69	205.375	experimental
69	he_38577	AUUCAAAUGAGAACUUUGAAGGCCGAAG	3	7	1432.43	79.364	4489.7	172.117	experimental
70	he_7043	GGCCCUAUAGCUCAGGGGUUAGAGCACUG	3	8	19602.9	296.429	19233	458.694	experimental
71	he_26307	GCGGGCCGCCGGUGAAAUACCACUACU	3	9	8996.52	101.336	18760.3	398.301	experimental
72	he_29304	GGUUCCAUAGUGUAGUGGUUAUCACAUCU	3	10	12193.7	111.427	16797.4	267.527	experimental
73	PUC2MM		3	11	10271.6	75.1476	17849.5	256.026	control	control_spike-calibration	LC Internal Use
74	xbz_22825	UGAGGUAGUAGUUUGUGUCUU	3	12	457.324	21.6531	2532.31	59.4323	experimental
75	he_4201	CAGUGCAAUGUUAAAAGGGCAU	3	13	150.38	7.80692	166.019	8.50177	experimental
76	xbz_14020	CAUUAUUACUUUUGGUACGCG	3	14	108.435	7.2541	34.9259	2.56396	experimental
77	he_51914	UAGUUAUCAGACUGAUGUUUAA	3	15	102.806	5.21582	34.287	1.62946	experimental
78	he_25101	UUCACAGUGGCUAAGUUCUGC	3	16	1430.42	43.072	5844.53	94.1639	experimental
79	he_38577	AUUCAAAUGAGAACUUUGAAGGCCGAAG	3	17	1370.71	51.3942	4227.92	120.2	experimental
80	he_7043	GGCCCUAUAGCUCAGGGGUUAGAGCACUG	3	18	19464.8	143.28	19011.5	343.304	experimental
81	he_26307	GCGGGCCGCCGGUGAAAUACCACUACU	3	19	8837.22	171.21	18863.2	343.928	experimental
82	he_29304	GGUUCCAUAGUGUAGUGGUUAUCACAUCU	3	20	11938.3	139.131	17654.1	337.015	experimental
83	PUC2MM		3	21	10267.5	164.889	19022.4	496.587	control	control_spike-calibration	LC Internal Use
84	xbz_22825	UGAGGUAGUAGUUUGUGUCUU	3	22	453.426	34.4517	2714.4	66.6405	experimental
85	he_4201	CAGUGCAAUGUUAAAAGGGCAU	3	23	149.843	9.58987	176.519	15.3065	experimental
86	xbz_14020	CAUUAUUACUUUUGGUACGCG	3	24	110.759	6.53512	31.6667	1.87457	experimental
87	he_51914	UAGUUAUCAGACUGAUGUUUAA	3	25	114.833	5.17814	32.5463	3.18109	experimental
88	he_25101	UUCACAGUGGCUAAGUUCUGC	3	26	1576.76	44.5484	6652.05	102.971	experimental
89	he_38577	AUUCAAAUGAGAACUUUGAAGGCCGAAG	3	27	1536.98	66.9455	4691.79	115.245	experimental
90	he_7043	GGCCCUAUAGCUCAGGGGUUAGAGCACUG	3	28	22584.5	187.488	19568.9	226.798	experimental
91	he_26307	GCGGGCCGCCGGUGAAAUACCACUACU	3	29	10612.1	84.0556	19085.6	179.062	experimental
92	he_29304	GGUUCCAUAGUGUAGUGGUUAUCACAUCU	3	30	14799.2	104.655	18074	188.439	experimental
93	PUC2MM		3	31	12604.6	241.217	19875.4	504.87	control	control_spike-calibration	LC Internal Use
94	BKG0		4	1	110.806	7.79463	30.5833	1.76214	control	control_empty	LC Internal Use
95	xbz_28632	CGCGGCGGGGCGCGGGAGA	4	2	7810.86	78.4695	20691.9	244.021	experimental
96	he_9720	UGCUCUGAUGAAAUCACUAAUAG	4	3	118.231	6.53761	4016.08	135.233	experimental
97	xbz_14021	CGUACCGUGAGUAAUAAUGCG	4	4	128.491	9.31033	60.0741	7.52653	experimental
98	he_51983	UGGAAGACUAGUGAUUUUGUUGUUU	4	5	171.593	15.2224	195.426	21.2819	experimental
99	he_13117	UCAUAAGAUCCAAGAAGAAGCA	4	6	4750.47	144.214	6070.43	276.838	experimental
100	he_38583	AUGAUAAACUAUGCCUGGGCAGGGCG	4	7	2892.68	50.5123	3643.02	89.3787	experimental
101	he_7044	AACUACUUUCUUGAUUCAGGUGUUUU	4	8	108.065	5.00518	31.9444	1.75528	experimental
102	he_26540	GCCCUGUGGUCUAGUGGUUAGGAUUCUG	4	9	37559.5	336.134	21654.7	572.346	experimental
103	he_41985	AUGAAUGAUGAACAGUAAUAAUGCUGACA	4	10	111.222	5.5574	37.0463	2.68392	experimental
104	BKG0		4	11	110.056	5.05453	35.537	2.05725	control	control_empty	LC Internal Use
105	xbz_28632	CGCGGCGGGGCGCGGGAGA	4	12	6935.94	115.821	17975.7	197.529	experimental
106	he_9720	UGCUCUGAUGAAAUCACUAAUAG	4	13	109.972	5.57105	3231.46	93.8209	experimental
107	xbz_14021	CGUACCGUGAGUAAUAAUGCG	4	14	121.889	5.2156	68.0926	8.58769	experimental
108	he_51983	UGGAAGACUAGUGAUUUUGUUGUUU	4	15	164.185	9.38895	202.824	16.37	experimental
109	he_13117	UCAUAAGAUCCAAGAAGAAGCA	4	16	4648.34	130.507	6190.57	171.156	experimental
110	he_38583	AUGAUAAACUAUGCCUGGGCAGGGCG	4	17	2819.57	59.5113	3550.41	77.0754	experimental
111	he_7044	AACUACUUUCUUGAUUCAGGUGUUUU	4	18	106.574	5.63567	37.0463	3.35273	experimental
112	he_26540	GCCCUGUGGUCUAGUGGUUAGGAUUCUG	4	19	36185.9	333.416	22022.9	598.503	experimental
113	he_41985	AUGAAUGAUGAACAGUAAUAAUGCUGACA	4	20	104.056	7.51426	33.3796	2.25777	experimental
114	BKG0		4	21	101.944	5.41171	33.4352	3.86277	control	control_empty	LC Internal Use
115	xbz_28632	CGCGGCGGGGCGCGGGAGA	4	22	7090.8	88.8455	19711.1	613.819	experimental
116	he_9720	UGCUCUGAUGAAAUCACUAAUAG	4	23	111.074	6.17457	3587.69	156.733	experimental
117	xbz_14021	CGUACCGUGAGUAAUAAUGCG	4	24	122.509	10.0731	64.2685	10.1065	experimental
118	he_51983	UGGAAGACUAGUGAUUUUGUUGUUU	4	25	162.611	13.5321	217.537	17.4744	experimental
119	he_13117	UCAUAAGAUCCAAGAAGAAGCA	4	26	5168.57	176.229	6705.41	211.618	experimental
120	he_38583	AUGAUAAACUAUGCCUGGGCAGGGCG	4	27	3304.96	66.739	4060.88	104.245	experimental
121	he_7044	AACUACUUUCUUGAUUCAGGUGUUUU	4	28	119.491	6.37826	33.4259	2.37669	experimental
122	he_26540	GCCCUGUGGUCUAGUGGUUAGGAUUCUG	4	29	44329	305.55	21691	181.782	experimental
123	he_41985	AUGAAUGAUGAACAGUAAUAAUGCUGACA	4	30	131.815	8.77139	34.6481	2.18882	experimental
124	BKG0		4	31	123.546	7.59166	30.1204	1.86316	control	control_empty	LC Internal Use
125	PUC2PM-20B		5	1	15012.8	228.051	28398.6	252.397	control	control_spike-calibration	LC Internal Use
126	xbz_26844	UGAGAACCACGUCUGCUCUGA	5	2	124.241	5.95288	45.0556	8.11003	experimental
127	he_16205	AGCUGGUGUUGUGAAUCAGGCCGU	5	3	177.88	7.22498	224.037	21.0868	experimental
128	xbz_11688	AUCUCGGACGAGCCCCCA	5	4	799.898	32.2055	267.361	31.1911	experimental
129	he_53591	AACUGUUUGCAGAGGAAACUGAGA	5	5	129.13	6.44907	50.8889	6.39119	experimental
130	he_12202	CACCCGUAGAACCGACCUUGCG	5	6	700.611	20.6179	716.537	48.7794	experimental
131	he_38779	GAGUGGUUCAAUUCCACCUUUCGGGCG	5	7	484.815	35.2903	153.083	12.7456	experimental
132	he_7253	CCUGGGCAACAUAGCGAGACCCCGUCUCUU	5	8	2452.99	65.8594	1914.75	84.8194	experimental
133	he_26559	AAUACAGGACUCUUUCGAGGCCCUGUAA	5	9	207.241	11.9515	125.741	12.1704	experimental
134	he_26836	AUGCAGAACAUCAUGAAUGACAUGCCG	5	10	113.12	4.66187	34.6944	2.26909	experimental
135	PUC2PM-20B		5	11	13154.3	104.352	26691.2	297.921	control	control_spike-calibration	LC Internal Use
136	xbz_26844	UGAGAACCACGUCUGCUCUGA	5	12	118.407	6.14169	46.9444	4.03451	experimental
137	he_16205	AGCUGGUGUUGUGAAUCAGGCCGU	5	13	167.954	8.87966	185.796	16.4395	experimental
138	xbz_11688	AUCUCGGACGAGCCCCCA	5	14	676.759	35.1631	240.611	20.5457	experimental
139	he_53591	AACUGUUUGCAGAGGAAACUGAGA	5	15	127.111	7.87559	61.8426	6.97547	experimental
140	he_12202	CACCCGUAGAACCGACCUUGCG	5	16	675.574	19.9711	679.074	32.3993	experimental
141	he_38779	GAGUGGUUCAAUUCCACCUUUCGGGCG	5	17	502.25	29.1445	165.824	9.65656	experimental
142	he_7253	CCUGGGCAACAUAGCGAGACCCCGUCUCUU	5	18	2366.66	84.1916	1847.4	58.1022	experimental
143	he_26559	AAUACAGGACUCUUUCGAGGCCCUGUAA	5	19	198.065	9.86192	120.63	16.5956	experimental
144	he_26836	AUGCAGAACAUCAUGAAUGACAUGCCG	5	20	105.12	6.45432	33.0648	1.92025	experimental
145	PUC2PM-20B		5	21	13027.5	203.475	28577.9	541.497	control	control_spike-calibration	LC Internal Use
146	xbz_26844	UGAGAACCACGUCUGCUCUGA	5	22	110.407	6.14625	43.7222	4.36604	experimental
147	he_16205	AGCUGGUGUUGUGAAUCAGGCCGU	5	23	173.991	13.5643	206.87	20.8489	experimental
148	xbz_11688	AUCUCGGACGAGCCCCCA	5	24	748.148	30.7114	241.722	27.1058	experimental
149	he_53591	AACUGUUUGCAGAGGAAACUGAGA	5	25	130.5	6.74571	57.1389	5.91759	experimental
150	he_12202	CACCCGUAGAACCGACCUUGCG	5	26	748.361	36.3623	803.787	51.3908	experimental
151	he_38779	GAGUGGUUCAAUUCCACCUUUCGGGCG	5	27	565.806	27.8549	179.528	15.4245	experimental
152	he_7253	CCUGGGCAACAUAGCGAGACCCCGUCUCUU	5	28	2672.14	84.8642	2078.34	105.325	experimental
153	he_26559	AAUACAGGACUCUUUCGAGGCCCUGUAA	5	29	241.88	16.9875	140.75	15.4872	experimental
154	he_26836	AUGCAGAACAUCAUGAAUGACAUGCCG	5	30	128.241	6.53798	34.213	2.47625	experimental
155	PUC2PM-20B		5	31	16444.1	224.011	30224.4	421.869	control	control_spike-calibration	LC Internal Use
156	PUC2MM-20B		6	1	117.176	10.662	33.2685	3.58764	control	control_spike-calibration	LC Internal Use
157	xbz_16439	AAGUGUUUGUGGGUUA	6	2	109.694	7.0359	30.5833	2.06042	experimental
158	he_11733	CAUUGCACUCGGUCUGA	6	3	116.741	8.86279	33.3704	2.77705	experimental
159	xbz_3169	GCCCCUGGGCCUAUCCUAGAAC	6	4	180.861	14.1186	108.981	13.6874	experimental
160	he_37871	UUAGCUCAGCAGGAAGAGCA	6	5	19442.6	219.053	7979.07	179.726	experimental
161	he_17857	CACGCUCAUGCACACACCCACA	6	6	610.944	42.5027	591.241	48.0836	experimental
162	he_38881	CCUCUUACUGCUAAAUUGGACUGGCUU	6	7	948.25	75.3683	74.3333	7.14208	experimental
163	he_7363	UGAUCACAACCAGUUACAGAUUUCUUUA	6	8	17844.5	237.115	7854.14	117.176	experimental
164	he_53286	UCCCCCAGGUGUGAUUCUGAUUUG	6	9	126.611	6.41673	43.5926	5.54512	experimental
165	he_33102	AUCAGUGAUGUGGAUCUAUUGACUGAGU	6	10	108.37	9.30641	32.9537	1.77408	experimental
166	PUC2MM-20B		6	11	111.13	8.60677	36.7222	3.31475	control	control_spike-calibration	LC Internal Use
167	xbz_16439	AAGUGUUUGUGGGUUA	6	12	103.694	5.80921	33.4259	2.30888	experimental
168	he_11733	CAUUGCACUCGGUCUGA	6	13	110.935	5.36216	34.6389	1.68256	experimental
169	xbz_3169	GCCCCUGGGCCUAUCCUAGAAC	6	14	157.593	9.80467	93.5741	14.1409	experimental
170	he_37871	UUAGCUCAGCAGGAAGAGCA	6	15	17330.3	110.171	6862.78	116.729	experimental
171	he_17857	CACGCUCAUGCACACACCCACA	6	16	549.176	27.2972	563.87	40.7078	experimental
172	he_38881	CCUCUUACUGCUAAAUUGGACUGGCUU	6	17	1232.21	82.1843	92.6944	9.84122	experimental
173	he_7363	UGAUCACAACCAGUUACAGAUUUCUUUA	6	18	17054.8	157.672	7746.46	139.472	experimental
174	he_53286	UCCCCCAGGUGUGAUUCUGAUUUG	6	19	124.315	6.82854	41.3056	3.68492	experimental
175	he_33102	AUCAGUGAUGUGGAUCUAUUGACUGAGU	6	20	98.25	6.42298	30.9352	2.68354	experimental
176	PUC2MM-20B		6	21	113.657	4.98252	35.8056	1.7902	control	control_spike-calibration	LC Internal Use
177	xbz_16439	AAGUGUUUGUGGGUUA	6	22	100.75	4.86668	32.5185	2.91141	experimental
178	he_11733	CAUUGCACUCGGUCUGA	6	23	111.713	6.76861	32	3.48294	experimental
179	xbz_3169	GCCCCUGGGCCUAUCCUAGAAC	6	24	175.269	16.7692	87.3981	8.75731	experimental
180	he_37871	UUAGCUCAGCAGGAAGAGCA	6	25	20290.6	344.646	8557.41	201.393	experimental
181	he_17857	CACGCUCAUGCACACACCCACA	6	26	610.37	24.6135	640.88	43.2207	experimental
182	he_38881	CCUCUUACUGCUAAAUUGGACUGGCUU	6	27	1259.51	63.4125	88.8241	8.01847	experimental
183	he_7363	UGAUCACAACCAGUUACAGAUUUCUUUA	6	28	20047.9	143.361	8864.06	149.157	experimental
184	he_53286	UCCCCCAGGUGUGAUUCUGAUUUG	6	29	145.037	5.16083	45.287	4.32565	experimental
185	he_33102	AUCAGUGAUGUGGAUCUAUUGACUGAGU	6	30	126.602	6.42126	30.9907	1.56178	experimental
186	PUC2MM-20B		6	31	133.565	6.84307	38.0833	3.37147	control	control_spike-calibration	LC Internal Use
187	a3-PUC2PM-20B		7	1	17701.6	329.049	35253	558.124	control	control_spike-calibration	LC Internal Use
188	xbz_16911	AAAUUGAUGGUGUAGUUA	7	2	112.491	4.97751	30.1574	2.0515	experimental
189	he_19849	UGAGGUAGAAGUUGGGCUGCU	7	3	120.269	7.02413	32.963	2.04128	experimental
190	xbz_8230	AAUCUUGAGUUGUGAU	7	4	107.889	8.65576	32.2593	3.32751	experimental
191	he_49840	GCUGGUUUCAUAUGGUGGUUUAGA	7	5	689.954	45.209	152.944	19.3264	experimental
192	he_24677	GUACAGUACUGUGAUAACUGAAGA	7	6	126.722	7.08537	49.4907	5.28	experimental
193	he_38904	GCAGCUAGCUCAGUCGGUAGAGCAUGAG	7	7	19821.3	252.94	18304.4	315.492	experimental
194	he_8109	GGUUCCAUGGUGUAAUGGUUAGCAUG	7	8	365.241	20.4336	199.546	22.4655	experimental
195	he_35265	UGUUAUGAUGAGAUUCCACUUAAG	7	9	112.935	6.375	33.3519	2.34945	experimental
196	he_32556	CUUUGAAAGGAUCGUCUUGUAUGGUG	7	10	115.056	6.20797	39.3889	2.864	experimental
197	a3-PUC2PM-20B		7	11	15417.7	81.3457	32706	550.544	control	control_spike-calibration	LC Internal Use
198	xbz_16911	AAAUUGAUGGUGUAGUUA	7	12	105.259	5.91903	35.1204	2.27837	experimental
199	he_19849	UGAGGUAGAAGUUGGGCUGCU	7	13	111.056	5.93396	36.1574	2.19669	experimental
200	xbz_8230	AAUCUUGAGUUGUGAU	7	14	102.25	5.88857	32.4815	1.09784	experimental
201	he_49840	GCUGGUUUCAUAUGGUGGUUUAGA	7	15	647.685	24.9443	140.111	9.77918	experimental
202	he_24677	GUACAGUACUGUGAUAACUGAAGA	7	16	119.676	7.2561	56.3056	5.42141	experimental
203	he_38904	GCAGCUAGCUCAGUCGGUAGAGCAUGAG	7	17	18671.1	220.342	17213.2	334.988	experimental
204	he_8109	GGUUCCAUGGUGUAAUGGUUAGCAUG	7	18	373.843	21.6778	209.472	16.8692	experimental
205	he_35265	UGUUAUGAUGAGAUUCCACUUAAG	7	19	106.287	8.30499	33.0648	2.06562	experimental
206	he_32556	CUUUGAAAGGAUCGUCUUGUAUGGUG	7	20	106.222	8.68701	32.5093	3.2454	experimental
207	a3-PUC2PM-20B		7	21	15219.1	147.709	34794.2	718.889	control	control_spike-calibration	LC Internal Use
208	xbz_16911	AAAUUGAUGGUGUAGUUA	7	22	101.074	3.56437	31.8426	2.05605	experimental
209	he_19849	UGAGGUAGAAGUUGGGCUGCU	7	23	110.769	6.54332	32.5093	2.65279	experimental
210	xbz_8230	AAUCUUGAGUUGUGAU	7	24	107.519	5.29412	33.6759	3.78593	experimental
211	he_49840	GCUGGUUUCAUAUGGUGGUUUAGA	7	25	694.056	42.9522	134.963	12.9902	experimental
212	he_24677	GUACAGUACUGUGAUAACUGAAGA	7	26	127.676	9.79398	49.9074	6.35042	experimental
213	he_38904	GCAGCUAGCUCAGUCGGUAGAGCAUGAG	7	27	21850.3	133.819	19843.2	286.585	experimental
214	he_8109	GGUUCCAUGGUGUAAUGGUUAGCAUG	7	28	453.12	17.7868	242.454	24.6983	experimental
215	he_35265	UGUUAUGAUGAGAUUCCACUUAAG	7	29	122.713	6.1341	33.3148	3.32267	experimental
216	he_32556	CUUUGAAAGGAUCGUCUUGUAUGGUG	7	30	131.898	6.13849	34.5278	1.93569	experimental
217	a3-PUC2PM-20B		7	31	19502.9	133.789	37006.6	588.843	control	control_spike-calibration	LC Internal Use
218	a3-PUC2MM-20B		8	1	120.926	8.50366	35.6389	4.43322	control	control_spike-calibration	LC Internal Use
219	xbz_27606	UACGUCAUCGUUGUCAUCGUCA	8	2	109.046	7.31454	33.25	3.8769	experimental
220	he_12051	UGAGACCUCUGGGUUCUGAGC	8	3	118.324	5.33693	33.7685	3.17586	experimental
221	xbz_8049	AACCCGUAGAUCCGAUCUUGUG	8	4	3017.35	79.4314	3495.88	119.647	experimental
222	he_31400	AAAAGUAUUUGCGGGUUUUGU	8	5	112.019	7.02995	30.2593	2.88201	experimental
223	he_26314	AAUGGCGCCACUAGGGUUGUGC	8	6	142.898	10.3246	52.287	5.81177	experimental
224	he_39032	AAACUGUGAUGAGGCACAAACUGAGU	8	7	126.815	7.90971	38.3981	2.90967	experimental
225	he_8209	UCUGUAGUGUAGUGGUUAUCACGUUU	8	8	809.361	37.1485	376.259	23.7331	experimental
226	he_53509	UUGGGGACAUUUUGCAUUCAU	8	9	105.519	5.48827	32.0556	2.46407	experimental
227	he_51829	CAUACGCACGUAGACAUUCCCCGCUUCCC	8	10	162.407	10.4067	65.463	6.90446	experimental
228	a3-PUC2MM-20B		8	11	110.898	7.7784	37.8519	2.81456	control	control_spike-calibration	LC Internal Use
229	xbz_27606	UACGUCAUCGUUGUCAUCGUCA	8	12	108.426	8.92147	33.9722	3.21637	experimental
230	he_12051	UGAGACCUCUGGGUUCUGAGC	8	13	115.398	6.5295	39.037	4.03472	experimental
231	xbz_8049	AACCCGUAGAUCCGAUCUUGUG	8	14	2591.49	82.5691	2965.67	72.6218	experimental
232	he_31400	AAAAGUAUUUGCGGGUUUUGU	8	15	104	4.72417	32.3981	1.58226	experimental
233	he_26314	AAUGGCGCCACUAGGGUUGUGC	8	16	140.907	6.01328	58.9722	6.65499	experimental
234	he_39032	AAACUGUGAUGAGGCACAAACUGAGU	8	17	132.139	6.70536	41.6574	3.26454	experimental
235	he_8209	UCUGUAGUGUAGUGGUUAUCACGUUU	8	18	857.574	61.6839	425	37.0655	experimental
236	he_53509	UUGGGGACAUUUUGCAUUCAU	8	19	108.148	4.24003	30.7407	2.29331	experimental
237	he_51829	CAUACGCACGUAGACAUUCCCCGCUUCCC	8	20	162.639	9.3133	60.2963	6.14507	experimental
238	a3-PUC2MM-20B		8	21	104.602	4.94066	37.75	3.37978	control	control_spike-calibration	LC Internal Use
239	xbz_27606	UACGUCAUCGUUGUCAUCGUCA	8	22	106.87	7.65017	31.8148	3.10907	experimental
240	he_12051	UGAGACCUCUGGGUUCUGAGC	8	23	113.426	7.57542	34.1574	3.18631	experimental
241	xbz_8049	AACCCGUAGAUCCGAUCUUGUG	8	24	2764.38	76.4147	3314.16	105.575	experimental
242	he_31400	AAAAGUAUUUGCGGGUUUUGU	8	25	108.454	5.45737	29.6389	2.03914	experimental
243	he_26314	AAUGGCGCCACUAGGGUUGUGC	8	26	140.565	9.32615	54.9722	6.65078	experimental
244	he_39032	AAACUGUGAUGAGGCACAAACUGAGU	8	27	132.019	9.10066	36.9259	3.2575	experimental
245	he_8209	UCUGUAGUGUAGUGGUUAUCACGUUU	8	28	1006.94	42.6428	494.537	34.3648	experimental
246	he_53509	UUGGGGACAUUUUGCAUUCAU	8	29	119.037	4.82192	29.8148	1.61851	experimental
247	he_51829	CAUACGCACGUAGACAUUCCCCGCUUCCC	8	30	203.75	14.744	60.463	8.53736	experimental
248	a3-PUC2MM-20B		8	31	137.269	7.36322	37.8796	2.6038	control	control_spike-calibration	LC Internal Use
249	rt_chr3_E_1	AAAGACCUGGCUUGUAAUUCUUUUAACCCCUG	9	1	113.713	7.39544	28.9444	2.99168	experimental
250	xbz_27642	AAAAGCUGGGUUGAGAGGGCGA	9	2	1310.15	48.1213	2282.83	79.641	experimental
251	he_6625	AGAGAAAGGAAACUUAGAUCUGUC	9	3	109.648	4.43081	30.7315	2.3704	experimental
252	xbz_9343	AAGGAGCUCACAGUCUAUUGAG	9	4	401.815	20.1718	796.028	39.8728	experimental
253	he_35606	CCGCGCGGGGGGCCCGGGC	9	5	6108.33	109.35	2860	97.2632	experimental
254	he_17154	ACCAAUAUUACUGUGCUGCUUU	9	6	120.528	10.17	37.6944	3.4301	experimental
255	he_39049	GACUUGUGAUGAAUCUUGGCUUCCUGAAG	9	7	122.065	7.94875	35.9167	3.02366	experimental
256	he_8520	GGGGGUAUAGCUCAGUGGGUAGAGCAUUU	9	8	27584.3	377.785	23299.4	424.96	experimental
257	he_38045	UGAGGUAGUAUUUUUUGUUGUUUGUUUU	9	9	106.5	5.82213	32.9537	2.49629	experimental
258	he_39085	AUGUGAUGUCAGGGCCUGCGUGGUAA	9	10	121.898	9.86539	34.537	2.96845	experimental
259	rt_chr4_A_3	UUGUCUUACUUUCCUCACAUAAGGAGUUAUUU	9	11	104.037	6.35246	32.0833	2.19228	experimental
260	xbz_27642	AAAAGCUGGGUUGAGAGGGCGA	9	12	1177.67	37.9175	1774.66	54.5157	experimental
261	he_6625	AGAGAAAGGAAACUUAGAUCUGUC	9	13	108.787	3.15058	34.1852	2.2178	experimental
262	xbz_9343	AAGGAGCUCACAGUCUAUUGAG	9	14	350.009	21.9087	692.546	41.6625	experimental
263	he_35606	CCGCGCGGGGGGCCCGGGC	9	15	5452.21	100.392	2462.23	93.4688	experimental
264	he_17154	ACCAAUAUUACUGUGCUGCUUU	9	16	116.287	5.01223	40.8426	2.90717	experimental
265	he_39049	GACUUGUGAUGAAUCUUGGCUUCCUGAAG	9	17	124.269	8.29774	40.9444	2.78458	experimental
266	he_8520	GGGGGUAUAGCUCAGUGGGUAGAGCAUUU	9	18	27022.6	172.825	22825.8	349.989	experimental
267	he_38045	UGAGGUAGUAUUUUUUGUUGUUUGUUUU	9	19	102.12	5.80962	31.9537	1.86149	experimental
268	he_39085	AUGUGAUGUCAGGGCCUGCGUGGUAA	9	20	111.083	9.108	33.7222	2.66101	experimental
269	rt_chr6_A_5	UUAGUUCUCUAUUCUUAUCAUUGAUUAUCAGA	9	21	100.398	6.47777	29.287	2.06914	experimental
270	xbz_27642	AAAAGCUGGGUUGAGAGGGCGA	9	22	1186.44	47.6728	1876.61	79.2922	experimental
271	he_6625	AGAGAAAGGAAACUUAGAUCUGUC	9	23	106.611	7.15494	32.6389	2.07098	experimental
272	xbz_9343	AAGGAGCUCACAGUCUAUUGAG	9	24	362.389	12.2824	755.5	41.9255	experimental
273	he_35606	CCGCGCGGGGGGCCCGGGC	9	25	6099.55	135.345	2824.88	97.2137	experimental
274	he_17154	ACCAAUAUUACUGUGCUGCUUU	9	26	124.37	6.23765	40.1111	5.11975	experimental
275	he_39049	GACUUGUGAUGAAUCUUGGCUUCCUGAAG	9	27	128.954	10.666	37.6667	3.99299	experimental
276	he_8520	GGGGGUAUAGCUCAGUGGGUAGAGCAUUU	9	28	32026.5	240.46	25974.5	377.906	experimental
277	he_38045	UGAGGUAGUAUUUUUUGUUGUUUGUUUU	9	29	123.009	7.46518	30.4352	2.06562	experimental
278	he_39085	AUGUGAUGUCAGGGCCUGCGUGGUAA	9	30	136.25	6.40258	35.6481	4.14755	experimental
279	chr2_D_1	AUUCAAAGACAAGAUUAUAUCUGCUUUUUAUU	9	31	130.25	7.23197	31.4167	2.04219	experimental
280	chr11_A_7	GCUCUGCCCCACUUUCCUCACUCCAGGACUCA	10	1	120.38	5.92274	30.1759	2.91252	experimental
281	xbz_27054	GGGCGGCUUGCAGAGCGGCCA	10	2	12317.5	160.475	9742.18	181.9	experimental
282	he_4926	AGGCAGUGUCAUUAGCUGAUUGU	10	3	119.065	7.50112	31.6759	2.61137	experimental
283	xbz_4638	AAGGUAGAUAGAACAGGUCUUG	10	4	140.583	9.09773	70.7593	8.15489	experimental
284	he_49837	ACUGAUUUCUUUUGGUGUUCAGA	10	5	113.102	4.75756	31.5185	3.25399	experimental
285	he_25626	CAUUAUUACUUUUGGUACGCG	10	6	122.037	5.88984	34.3241	2.19953	experimental
286	he_39302	GCCUUGGUGUAUAGUGGUGAGCAUAGCU	10	7	37807	211.79	24263.3	475.85	experimental
287	he_8569	UGGAAGACUAGUGAUUUUGUUGUUGU	10	8	144.204	8.00089	125.63	21.3623	experimental
288	he_29697	CUGAAGACGAAUAAGAAUUUGUAG	10	9	110.75	6.10978	32.8889	2.42006	experimental
289	he_52010	UUGCAGUACUUCCAGGAAUGGUGCACCA	10	10	165.454	9.87339	151.37	14.5182	experimental
290	chr2_B_2	AAAUAGUAAAUUUUAAUGAUCAGAUUUAAAAU	10	11	109.139	8.28517	31.1574	1.51727	experimental
291	xbz_27054	GGGCGGCUUGCAGAGCGGCCA	10	12	10959.1	128.869	7439.74	73.2558	experimental
292	he_4926	AGGCAGUGUCAUUAGCUGAUUGU	10	13	110.389	5.44099	32.6481	1.84601	experimental
293	xbz_4638	AAGGUAGAUAGAACAGGUCUUG	10	14	124.583	4.74219	76.7222	12.1877	experimental
294	he_49837	ACUGAUUUCUUUUGGUGUUCAGA	10	15	103.593	5.29686	34.8796	1.8531	experimental
295	he_25626	CAUUAUUACUUUUGGUACGCG	10	16	114.5	6.44096	38.4537	2.69435	experimental
296	he_39302	GCCUUGGUGUAUAGUGGUGAGCAUAGCU	10	17	35368.2	390.641	22727	361.618	experimental
297	he_8569	UGGAAGACUAGUGAUUUUGUUGUUGU	10	18	152.019	7.70603	141.333	12.083	experimental
298	he_29697	CUGAAGACGAAUAAGAAUUUGUAG	10	19	107.407	5.44134	31.537	2.68755	experimental
299	he_52010	UUGCAGUACUUCCAGGAAUGGUGCACCA	10	20	149.37	8.66035	140.583	9.52922	experimental
300	chr18_B_3	CUAUAGGGACAGCCAAGGCCUGAGUGCUAGGA	10	21	110.981	6.47783	31.9722	3.88011	experimental
301	xbz_27054	GGGCGGCUUGCAGAGCGGCCA	10	22	11204.2	107.578	7907.22	121.61	experimental
302	he_4926	AGGCAGUGUCAUUAGCUGAUUGU	10	23	109.333	5.29856	30.8333	2.35018	experimental
303	xbz_4638	AAGGUAGAUAGAACAGGUCUUG	10	24	133.463	11.461	70.2685	12.4934	experimental
304	he_49837	ACUGAUUUCUUUUGGUGUUCAGA	10	25	113.306	7.28134	32.1111	2.8916	experimental
305	he_25626	CAUUAUUACUUUUGGUACGCG	10	26	119.093	5.56111	33.2037	2.04966	experimental
306	he_39302	GCCUUGGUGUAUAGUGGUGAGCAUAGCU	10	27	41539.2	280.248	27274.1	300.255	experimental
307	he_8569	UGGAAGACUAGUGAUUUUGUUGUUGU	10	28	172.093	11.8901	167.898	21.4144	experimental
308	he_29697	CUGAAGACGAAUAAGAAUUUGUAG	10	29	126.926	3.82247	31.3796	1.994	experimental
309	he_52010	UUGCAGUACUUCCAGGAAUGGUGCACCA	10	30	184.074	8.83039	152.731	15.1198	experimental
310	empty		10	31	121.787	5.39132	28.2222	2.24372	control	control_empty
311	chr9_B_6	AAUAUACUUGUAUUUAUUUACUAUUACCACAG	11	1	115.824	4.94801	27.8981	2.17866	experimental
312	xbz_18744	GAAGGUUUAGAUGUUACU	11	2	111.361	5.94438	31.1389	2.40116	experimental
313	he_17193	UGAGUUAGUAGAUGUGUGGUUU	11	3	118.769	6.69161	30.6667	1.6911	experimental
314	xbz_6473	CACCCGUAGAACCGACCUUGCG	11	4	799.306	29.6104	765.806	54.6439	experimental
315	he_43858	AAUUUAGGACUAUGUAGCAUA	11	5	113.259	6.28359	31.3333	2.8449	experimental
316	he_23414	UAAUAACAGUAGUAGACAACGUUUA	11	6	124.009	11.403	34.9444	3.06269	experimental
317	he_39456	GGCCGGUUAGCUCAGUUGGUUAGAGCAUGG	11	7	8785.25	185.103	11693.7	142.993	experimental
318	he_8749	UCUGGUGAUGAAAUGGAACGUUUCUGAUG	11	8	116.352	6.00049	35.1759	2.56077	experimental
319	he_45492	AACUAUUUAAGAUACAUUGG	11	9	115.898	6.24116	32.5833	2.70729	experimental
320	he_35232	UACAUGCCGACGGGCACUGACCUCCUU	11	10	412.519	25.8111	458.713	25.5771	experimental
321	chr10_C_2	AAUAUUUCACAUUCUUUAGAAAGUUUGUUUUU	11	11	109.417	7.1239	31.0093	1.96937	experimental
322	xbz_18744	GAAGGUUUAGAUGUUACU	11	12	108.602	6.16281	31.7685	2.35061	experimental
323	he_17193	UGAGUUAGUAGAUGUGUGGUUU	11	13	109.241	4.1533	32.7685	2.24069	experimental
324	xbz_6473	CACCCGUAGAACCGACCUUGCG	11	14	708.009	24.6825	709.083	41.4625	experimental
325	he_43858	AAUUUAGGACUAUGUAGCAUA	11	15	108.685	5.74318	34.1019	2.37959	experimental
326	he_23414	UAAUAACAGUAGUAGACAACGUUUA	11	16	121.287	7.02738	36.8333	2.07116	experimental
327	he_39456	GGCCGGUUAGCUCAGUUGGUUAGAGCAUGG	11	17	8702.99	217.232	11418.1	128.575	experimental
328	he_8749	UCUGGUGAUGAAAUGGAACGUUUCUGAUG	11	18	112.926	6.31376	39.0185	3.40418	experimental
329	he_45492	AACUAUUUAAGAUACAUUGG	11	19	103.944	6.90095	31.5093	2.58499	experimental
330	he_35232	UACAUGCCGACGGGCACUGACCUCCUU	11	20	400.509	31.5332	411.111	33.377	experimental
331	chr2_B_2	AAAUAGUAAAUUUUAAUGAUCAGAUUUAAAAU	11	21	106.389	5.17874	29.3148	2.66036	experimental
332	xbz_18744	GAAGGUUUAGAUGUUACU	11	22	105.815	5.36891	32.75	3.13594	experimental
333	he_17193	UGAGUUAGUAGAUGUGUGGUUU	11	23	108.574	8.00608	29.8611	2.2022	experimental
334	xbz_6473	CACCCGUAGAACCGACCUUGCG	11	24	741.398	22.9237	727.074	39.5214	experimental
335	he_43858	AAUUUAGGACUAUGUAGCAUA	11	25	121.324	8.9284	31.1944	2.66321	experimental
336	he_23414	UAAUAACAGUAGUAGACAACGUUUA	11	26	117.935	7.94405	34.4074	3.24984	experimental
337	he_39456	GGCCGGUUAGCUCAGUUGGUUAGAGCAUGG	11	27	9755.94	248.335	13607.8	196.907	experimental
338	he_8749	UCUGGUGAUGAAAUGGAACGUUUCUGAUG	11	28	125.759	6.36707	39.5185	4.58662	experimental
339	he_45492	AACUAUUUAAGAUACAUUGG	11	29	124.546	5.59436	30.8426	2.18389	experimental
340	he_35232	UACAUGCCGACGGGCACUGACCUCCUU	11	30	466.574	20.3829	519.148	40.108	experimental
341	rt_chr2_B_1	UUUGAUUGUUAUUUAUUGACUUGUGUUUGUCU	11	31	128.019	6.65573	29.463	1.73704	experimental
342	chr13_D_6	UGGCCACAUUUCUCCUGGUAUAAGUCACUUGC	12	1	114.87	7.71707	28.6667	2.00467	experimental
343	xbz_27253	AGGCGGAGACUUGGGCAAUUG	12	2	202.88	17.2982	50.5926	6.24879	experimental
344	he_14144	ACAUCGAAACUCUGGAAAAAG	12	3	117	7.46831	30.963	2.01363	experimental
345	xbz_13871	CAGUCCAUGGGCAUAUACACUU	12	4	163.25	11.7959	76.1574	11.5477	experimental
346	he_41210	UCCUCAUUUGUAUAGUGGUGAGUA	12	5	21175	269.923	6340.89	269.197	experimental
347	he_25328	GCAGUCCAUGGGCAUAUACACU	12	6	192.796	6.47462	99.8148	14.3163	experimental
348	he_39736	CUUCUCAUUACUGCACUUGACUAGUCUU	12	7	4522.52	103.977	3877.15	83.0457	experimental
349	he_8774	AGGGAUUGUGGGUUCGAGUCCCACCCGG	12	8	968.324	51.8645	558.833	34.6317	experimental
350	he_30693	CCUGGGUGACAAAGGGAGAUUCUGGUUU	12	9	116.259	7.38699	36.037	2.52807	experimental
351	he_38877	GAAAUUCAUAAAGUACAGACAUGUUUU	12	10	104.361	3.43282	32.9352	2.05655	experimental
352	rt_chr1_A_1	AUAGCCAAAACUGUCUUGAAAUAGAACAAAGU	12	11	112.259	8.96657	30.8889	1.9922	experimental
353	xbz_27253	AGGCGGAGACUUGGGCAAUUG	12	12	185.231	10.0639	49.463	4.64924	experimental
354	he_14144	ACAUCGAAACUCUGGAAAAAG	12	13	112.435	7.67478	35.2963	1.59004	experimental
355	xbz_13871	CAGUCCAUGGGCAUAUACACUU	12	14	151.509	7.93136	78.9537	10.8519	experimental
356	he_41210	UCCUCAUUUGUAUAGUGGUGAGUA	12	15	19494.2	437.689	6273.94	372.319	experimental
357	he_25328	GCAGUCCAUGGGCAUAUACACU	12	16	184.481	15.0752	104.361	9.42998	experimental
358	he_39736	CUUCUCAUUACUGCACUUGACUAGUCUU	12	17	4224.78	58.252	3668.87	56.7337	experimental
359	he_8774	AGGGAUUGUGGGUUCGAGUCCCACCCGG	12	18	936.167	55.9059	592.435	31.2474	experimental
360	he_30693	CCUGGGUGACAAAGGGAGAUUCUGGUUU	12	19	106.815	4.56142	34.1852	3.74452	experimental
361	he_38877	GAAAUUCAUAAAGUACAGACAUGUUUU	12	20	99.8611	6.92342	29.7037	2.01517	experimental
362	chr10_C_2	AAUAUUUCACAUUCUUUAGAAAGUUUGUUUUU	12	21	106.704	7.94286	28.2685	2.39394	experimental
363	xbz_27253	AGGCGGAGACUUGGGCAAUUG	12	22	175.306	13.5787	50.1296	5.31458	experimental
364	he_14144	ACAUCGAAACUCUGGAAAAAG	12	23	108.565	9.50482	34.0556	2.61853	experimental
365	xbz_13871	CAGUCCAUGGGCAUAUACACUU	12	24	149.852	7.24835	76.7963	10.0464	experimental
366	he_41210	UCCUCAUUUGUAUAGUGGUGAGUA	12	25	22483.8	547.024	7445.52	275.106	experimental
367	he_25328	GCAGUCCAUGGGCAUAUACACU	12	26	197.204	14.8322	97.5	15.6769	experimental
368	he_39736	CUUCUCAUUACUGCACUUGACUAGUCUU	12	27	4775.26	177.587	4389.37	188.26	experimental
369	he_8774	AGGGAUUGUGGGUUCGAGUCCCACCCGG	12	28	1148.39	71.6023	696.861	50.5126	experimental
370	he_30693	CCUGGGUGACAAAGGGAGAUUCUGGUUU	12	29	128.157	6.15404	36.6389	3.64412	experimental
371	he_38877	GAAAUUCAUAAAGUACAGACAUGUUUU	12	30	125.213	8.47873	30.4815	1.80592	experimental
372	rt_chr6_A_5	UUAGUUCUCUAUUCUUAUCAUUGAUUAUCAGA	12	31	134.685	6.26315	29.1481	1.86364	experimental
373	rt_chr2_D_2	AGGAUUGCAGUCACUGCAUGAAGUUAGUCACC	13	1	113.963	6.51659	30.8148	2.53627	experimental
374	xbz_25711	UUAUGGUUUGCCUGGGACUGA	13	2	354.028	19.0216	489.787	29.2265	experimental
375	he_19909	CUUAACUUGACCUCUUUAAA	13	3	109.176	8.79234	30.0648	1.89082	experimental
376	xbz_11369	UAGAGGAGAUGGCGCAGGGG	13	4	572	21.645	563.157	35.176	experimental
377	he_38547	CUGGAGAUAUGGAAGAGCUGUGU	13	5	127.667	5.07514	50.0278	8.21494	experimental
378	he_18545	UGGAAAUGAUGAUUAUACUGAUU	13	6	117.287	5.64039	34.6574	2.07415	experimental
379	he_39883	CCGUGGUGGUAUAGUGGUGAGCAUAGCU	13	7	36769.9	296.219	24327.6	209.533	experimental
380	he_8776	GGCUCGUUGGUCUAGGGGUGUGGUUCUC	13	8	31530.6	283.116	35150.5	535.406	experimental
381	he_35260	UUGUGACUGUUCCUGGUAUUGAUU	13	9	111.139	5.85089	36.5463	2.5445	experimental
382	he_27781	UGUGGAUAAAGGAGAAAACUACUGUU	13	10	113.083	5.98616	35.8796	2.93136	experimental
383	rt_chr9_F_1	AGCCUGCUGCUGUAGCCAAGACAGCUUGUUUU	13	11	113.426	7.62216	31.8056	1.78497	experimental
384	xbz_25711	UUAUGGUUUGCCUGGGACUGA	13	12	326.231	20.1079	458.991	28.207	experimental
385	he_19909	CUUAACUUGACCUCUUUAAA	13	13	111.231	6.42514	34.6574	3.76199	experimental
386	xbz_11369	UAGAGGAGAUGGCGCAGGGG	13	14	506.426	23.1796	556.741	42.5288	experimental
387	he_38547	CUGGAGAUAUGGAAGAGCUGUGU	13	15	124.491	5.13099	47.6574	3.82848	experimental
388	he_18545	UGGAAAUGAUGAUUAUACUGAUU	13	16	113.852	6.27682	35.8981	1.85422	experimental
389	he_39883	CCGUGGUGGUAUAGUGGUGAGCAUAGCU	13	17	34744.5	437.541	23008.7	225.539	experimental
390	he_8776	GGCUCGUUGGUCUAGGGGUGUGGUUCUC	13	18	30732.7	206.431	33894.9	533.871	experimental
391	he_35260	UUGUGACUGUUCCUGGUAUUGAUU	13	19	107.324	7.10512	36.4352	2.15854	experimental
392	he_27781	UGUGGAUAAAGGAGAAAACUACUGUU	13	20	106.787	6.00631	33.3704	2.64608	experimental
393	rt_chr1_A_1	AUAGCCAAAACUGUCUUGAAAUAGAACAAAGU	13	21	102.111	7.44617	31.5093	1.62628	experimental
394	xbz_25711	UUAUGGUUUGCCUGGGACUGA	13	22	332.083	16.8179	434.389	20.192	experimental
395	he_19909	CUUAACUUGACCUCUUUAAA	13	23	106.889	6.48699	30.3333	1.8189	experimental
396	xbz_11369	UAGAGGAGAUGGCGCAGGGG	13	24	545.62	18.233	580.204	42.8708	experimental
397	he_38547	CUGGAGAUAUGGAAGAGCUGUGU	13	25	135.065	9.31612	51.3981	5.19155	experimental
398	he_18545	UGGAAAUGAUGAUUAUACUGAUU	13	26	117.87	7.61098	33.6944	2.30991	experimental
399	he_39883	CCGUGGUGGUAUAGUGGUGAGCAUAGCU	13	27	40174.4	258.049	28833	346.194	experimental
400	he_8776	GGCUCGUUGGUCUAGGGGUGUGGUUCUC	13	28	36358.6	513.141	40773	527.589	experimental
401	he_35260	UUGUGACUGUUCCUGGUAUUGAUU	13	29	120.778	6.88807	33.9352	2.34928	experimental
402	he_27781	UGUGGAUAAAGGAGAAAACUACUGUU	13	30	130.12	5.44766	32.6389	1.97393	experimental
403	chr18_B_3	CUAUAGGGACAGCCAAGGCCUGAGUGCUAGGA	13	31	145.019	8.32739	34.2315	2.81719	experimental
404	rt_chr1_G_1	UUUUAUUAUGUAUAAAAAUUUGAUUAUAAAUC	14	1	116.722	3.77853	28.8056	1.79542	experimental
405	xbz_26134	AAUUUCGGUUGGGGA	14	2	117.722	4.43822	36.1111	2.8591	experimental
406	he_8862	AACUGGCCCUCAAAGUCCCGCU	14	3	143.87	8.60351	58.3611	7.5138	experimental
407	xbz_9334	UCCCUUUGGAGCUGAUU	14	4	127.167	8.20702	41.4815	4.54979	experimental
408	he_29970	AGCAGCAUUGUACAGGGCUAUC	14	5	740.574	52.672	1386.85	68.8252	experimental
409	he_21320	GAGUUCUUCCUACGAUC	14	6	122.528	5.42658	38.1481	3.61155	experimental
410	he_40110	UGGGGUAUAGCUCAGUGGUAGAGCAUUUG	14	7	23464.7	291.637	20170	241.261	experimental
411	he_8778	AGGCUCGUUGGUCUAGGGGUAUGAUUCUC	14	8	27882.6	246.188	36010	347.302	experimental
412	he_26836	AUGCAGAACAUCAUGAAUGACAUGCCG	14	9	116.556	7.90875	39.0093	5.10359	experimental
413	he_52065	GCCAUAGCCCGGUCGCUGGUACAUGA	14	10	112.13	4.29103	76.213	7.47588	experimental
414	rt_chr2_B_1	UUUGAUUGUUAUUUAUUGACUUGUGUUUGUCU	14	11	107.694	5.72167	31.3889	2.13048	experimental
415	xbz_26134	AAUUUCGGUUGGGGA	14	12	105.222	5.92844	35.787	2.79201	experimental
416	he_8862	AACUGGCCCUCAAAGUCCCGCU	14	13	138.528	7.1453	62.3148	8.54745	experimental
417	xbz_9334	UCCCUUUGGAGCUGAUU	14	14	119.843	6.1129	44	4.46167	experimental
418	he_29970	AGCAGCAUUGUACAGGGCUAUC	14	15	681.926	22.9606	1328.26	65.207	experimental
419	he_21320	GAGUUCUUCCUACGAUC	14	16	118.556	7.00378	39.2963	3.49167	experimental
420	he_40110	UGGGGUAUAGCUCAGUGGUAGAGCAUUUG	14	17	21970.8	337.404	19212.5	231.203	experimental
421	he_8778	AGGCUCGUUGGUCUAGGGGUAUGAUUCUC	14	18	27271.6	230.611	35427.4	402.298	experimental
422	he_26836	AUGCAGAACAUCAUGAAUGACAUGCCG	14	19	108.407	8.0478	37.9074	3.01565	experimental
423	he_52065	GCCAUAGCCCGGUCGCUGGUACAUGA	14	20	110.25	6.45781	65.463	10.1525	experimental
424	rt_chr9_F_1	AGCCUGCUGCUGUAGCCAAGACAGCUUGUUUU	14	21	105.546	7.09005	30.5648	1.97306	experimental
425	xbz_26134	AAUUUCGGUUGGGGA	14	22	112.213	8.49524	33.9722	3.70011	experimental
426	he_8862	AACUGGCCCUCAAAGUCCCGCU	14	23	140.787	13.7148	56.7963	7.5266	experimental
427	xbz_9334	UCCCUUUGGAGCUGAUU	14	24	122.889	5.63091	46.5648	5.32192	experimental
428	he_29970	AGCAGCAUUGUACAGGGCUAUC	14	25	729.38	28.2087	1417.72	60.8674	experimental
429	he_21320	GAGUUCUUCCUACGAUC	14	26	129.62	7.12993	36.4722	4.27656	experimental
430	he_40110	UGGGGUAUAGCUCAGUGGUAGAGCAUUUG	14	27	25174.5	157.172	23672.8	411.12	experimental
431	he_8778	AGGCUCGUUGGUCUAGGGGUAUGAUUCUC	14	28	31649.5	351.534	44079.3	354.969	experimental
432	he_26836	AUGCAGAACAUCAUGAAUGACAUGCCG	14	29	132.046	7.15696	37.75	3.49933	experimental
433	he_52065	GCCAUAGCCCGGUCGCUGGUACAUGA	14	30	133.139	9.15644	82.0278	8.04364	experimental
434	chr2_D_1	AUUCAAAGACAAGAUUAUAUCUGCUUUUUAUU	14	31	128.917	4.22968	30.9907	2.4284	experimental
435	hsa-5S-b1		15	1	11259.6	147.303	6492.48	235.646	control	control_biosequences	LC Internal Use
436	xbz_20511	CGGAGCUGGGGAUUGUGGGU	15	2	6044.51	50.8782	14375.8	225.94	experimental
437	he_21878	UGAAUGAUUAAAGGUCUUGGGGCC	15	3	871.435	37.8058	4129.08	152.351	experimental
438	xbz_8692	GUUCUACAGUCCACGGAUC	15	4	115.213	5.89955	31.6296	2.29828	experimental
439	he_53589	CAAGUCACUAGUGGUUCCGUUUAG	15	5	394.241	29.47	733.889	41.2377	experimental
440	he_11072	GUGGAGUGUGACAAUGGUGUUUG	15	6	133.565	13.0644	39.1019	3.17095	experimental
441	he_40138	ACUGCCCUGGCGGAACGCUGAGAAGAC	15	7	10301.1	159.573	13660.5	244.392	experimental
442	he_8779	AAGCCCGGCUAGCUCAGUCGGUAGAGCAUG	15	8	19473.4	154.716	17445.6	252.616	experimental
443	he_26695	AAUGGAUCUGGGUGGCCACGUGA	15	9	126.148	5.55989	39.2685	1.74338	experimental
444	he_39482	UAAGCUGCUAUGUAUGGAUUUAAACCGU	15	10	115.509	4.98689	35.8148	1.80936	experimental
445	hsa-5S-b1		15	11	10085.9	128.458	4995.48	106.811	control	control_biosequences	LC Internal Use
446	xbz_20511	CGGAGCUGGGGAUUGUGGGU	15	12	5369.58	65.7938	11482.7	118.201	experimental
447	he_21878	UGAAUGAUUAAAGGUCUUGGGGCC	15	13	801.824	30.6755	3695.71	133.455	experimental
448	xbz_8692	GUUCUACAGUCCACGGAUC	15	14	107.852	4.53813	34.8704	2.36047	experimental
449	he_53589	CAAGUCACUAGUGGUUCCGUUUAG	15	15	349.12	15.5303	738.194	47.9779	experimental
450	he_11072	GUGGAGUGUGACAAUGGUGUUUG	15	16	123.731	6.2616	44.787	2.48754	experimental
451	he_40138	ACUGCCCUGGCGGAACGCUGAGAAGAC	15	17	9825.38	151.241	13399.2	226.399	experimental
452	he_8779	AAGCCCGGCUAGCUCAGUCGGUAGAGCAUG	15	18	19133.9	267.05	17164.1	236.21	experimental
453	he_26695	AAUGGAUCUGGGUGGCCACGUGA	15	19	113.62	8.84204	38.3704	3.78288	experimental
454	he_39482	UAAGCUGCUAUGUAUGGAUUUAAACCGU	15	20	104.648	8.67407	34.7963	2.31516	experimental
455	hsa-5S-b1		15	21	9807.01	188.02	4863.39	154.494	control	control_biosequences	LC Internal Use
456	xbz_20511	CGGAGCUGGGGAUUGUGGGU	15	22	5598.35	142.74	11908.9	192.95	experimental
457	he_21878	UGAAUGAUUAAAGGUCUUGGGGCC	15	23	802.074	39.7555	3756.69	128.209	experimental
458	xbz_8692	GUUCUACAGUCCACGGAUC	15	24	117.667	6.71029	33.8981	2.39914	experimental
459	he_53589	CAAGUCACUAGUGGUUCCGUUUAG	15	25	419.722	22.3573	770.63	27.9635	experimental
460	he_11072	GUGGAGUGUGACAAUGGUGUUUG	15	26	139.88	10.511	39.4537	4.46876	experimental
461	he_40138	ACUGCCCUGGCGGAACGCUGAGAAGAC	15	27	11434.1	200.418	16307.2	208.5	experimental
462	he_8779	AAGCCCGGCUAGCUCAGUCGGUAGAGCAUG	15	28	22527.1	185.963	21135.6	239.876	experimental
463	he_26695	AAUGGAUCUGGGUGGCCACGUGA	15	29	143.046	9.28307	39.037	4.90265	experimental
464	he_39482	UAAGCUGCUAUGUAUGGAUUUAAACCGU	15	30	133.167	5.72827	35.8056	2.37376	experimental
465	hsa-5S-b1		15	31	12463.2	130.297	5693.6	130.55	control	control_biosequences	LC Internal Use
466	hsa-5S-b2		16	1	3019.79	61.0071	9056.19	158.451	control	control_biosequences	LC Internal Use
467	xbz_19786	AAAAAUUUCUGUUGGGUA	16	2	111.315	4.60525	30.1111	2.38113	experimental
468	he_9903	UGGGUCUUUGCGGGCGAGAUGA	16	3	185.176	17.7279	93.6852	9.31851	experimental
469	xbz_9202	ACCAAUAUUACUGUGCUGCUUU	16	4	119.333	8.46985	36.25	2.84202	experimental
470	he_27500	AUGGGUGAAUUUGUAGAAGGAU	16	5	113.426	9.01318	32.7593	1.91829	experimental
471	he_6383	AGAAAUGAUGUUAUUCUGAAA	16	6	115.602	7.84421	32.5556	2.71491	experimental
472	he_40142	ACUUCUUAGAGGGACAAGUGGCGUUC	16	7	1784.87	58.98	7310.4	195.086	experimental
473	he_8797	GUGACUGAGUCUUAAGCAAUGAUGCG	16	8	122.648	12.491	35.9444	3.6502	experimental
474	he_43902	UGGAAAUGAUGAAAUAGAGA	16	9	114.241	5.83235	35.9352	2.9774	experimental
475	he_52106	GCCCAGCUAGCUCAGUCGGUAGAGGAUA	16	10	7848.48	102.166	8484.24	155.993	experimental
476	hsa-5S-b2		16	11	2627.8	73.4974	6861.39	130.208	control	control_biosequences	LC Internal Use
477	xbz_19786	AAAAAUUUCUGUUGGGUA	16	12	104.963	5.44458	32.9537	2.18912	experimental
478	he_9903	UGGGUCUUUGCGGGCGAGAUGA	16	13	169.324	11.4874	101.574	15.4383	experimental
479	xbz_9202	ACCAAUAUUACUGUGCUGCUUU	16	14	109.556	5.86823	38.2037	3.83968	experimental
480	he_27500	AUGGGUGAAUUUGUAGAAGGAU	16	15	105.444	6.43927	35.3889	1.98985	experimental
481	he_6383	AGAAAUGAUGUUAUUCUGAAA	16	16	105.991	4.43119	34.8796	1.35838	experimental
482	he_40142	ACUUCUUAGAGGGACAAGUGGCGUUC	16	17	1856.6	29.535	7694.38	164.883	experimental
483	he_8797	GUGACUGAGUCUUAAGCAAUGAUGCG	16	18	119.954	8.63527	41.4815	4.67141	experimental
484	he_43902	UGGAAAUGAUGAAAUAGAGA	16	19	107.148	5.35962	32.6111	2.96973	experimental
485	he_52106	GCCCAGCUAGCUCAGUCGGUAGAGGAUA	16	20	7446.02	145.997	8243.57	188.475	experimental
486	hsa-5S-b2		16	21	2596.24	101.467	6953.46	203.87	control	control_biosequences	LC Internal Use
487	xbz_19786	AAAAAUUUCUGUUGGGUA	16	22	105.12	6.48322	30.9907	2.14213	experimental
488	he_9903	UGGGUCUUUGCGGGCGAGAUGA	16	23	167.176	10.5572	92.2963	12.8966	experimental
489	xbz_9202	ACCAAUAUUACUGUGCUGCUUU	16	24	110.528	7.01195	35.7685	3.49795	experimental
490	he_27500	AUGGGUGAAUUUGUAGAAGGAU	16	25	115.019	8.916	33.2778	2.72006	experimental
491	he_6383	AGAAAUGAUGUUAUUCUGAAA	16	26	116.75	8.15289	31.3981	2.805	experimental
492	he_40142	ACUUCUUAGAGGGACAAGUGGCGUUC	16	27	2067.35	60.3506	9041.08	243.769	experimental
493	he_8797	GUGACUGAGUCUUAAGCAAUGAUGCG	16	28	136.944	6.79312	37.9352	4.25204	experimental
494	he_43902	UGGAAAUGAUGAAAUAGAGA	16	29	127.926	5.44763	33.6944	3.0646	experimental
495	he_52106	GCCCAGCUAGCUCAGUCGGUAGAGGAUA	16	30	9480.26	104.267	10296.3	144.223	experimental
496	hsa-5S-b2		16	31	3217.61	57.7586	7824.57	160.491	control	control_biosequences	LC Internal Use
497	hsa-5S-b3		17	1	3204.67	75.9067	6124.59	134.784	control	control_biosequences	LC Internal Use
498	xbz_26370	CUGGGAGAAGGCUGUUUACU	17	2	141.731	7.55863	50.1944	5.11267	experimental
499	he_18321	UACUUGUUUUAGGAGUAUCUUAA	17	3	115.963	5.23633	30.3704	1.75399	experimental
500	xbz_3740	AGGUUGGGAUCGGUUGCAAUGCU	17	4	206.704	11.2485	41.4167	5.80545	experimental
501	he_44031	CUCAAACUUGUUGGAGUAGGC	17	5	162.019	11.7989	55.4907	8.90395	experimental
502	he_6833	UAAGGUGCAUCUAGUGCAGAU	17	6	139.991	10.0406	73.5556	6.05324	experimental
503	he_40162	GAGAGGUGUAGAAUAAGUGGGAGGUCCCC	17	7	8511.47	141.275	16718.4	191.379	experimental
504	he_9047	CUUUAACGAAGAUCCAUUGGAGGGCA	17	8	1233.09	61.8495	1607.03	40.2138	experimental
505	he_29981	AAUUUUUAAUGCAGAAGUUUGAAUGAAG	17	9	115.435	7.68452	34.1759	1.89356	experimental
506	he_42318	ACUGUGUGCUGAUUGUCACGUUCUGAUU	17	10	105.667	7.18123	162.352	14.6895	experimental
507	hsa-5S-b3		17	11	2850.44	50.7777	4853	112.503	control	control_biosequences	LC Internal Use
508	xbz_26370	CUGGGAGAAGGCUGUUUACU	17	12	136.62	7.35192	51.8241	5.02671	experimental
509	he_18321	UACUUGUUUUAGGAGUAUCUUAA	17	13	106.194	8.25919	33.0648	2.42754	experimental
510	xbz_3740	AGGUUGGGAUCGGUUGCAAUGCU	17	14	183.963	13.188	46.463	4.53321	experimental
511	he_44031	CUCAAACUUGUUGGAGUAGGC	17	15	150.704	12.538	61.6852	7.52149	experimental
512	he_6833	UAAGGUGCAUCUAGUGCAGAU	17	16	138.991	9.22765	84.6296	8.45172	experimental
513	he_40162	GAGAGGUGUAGAAUAAGUGGGAGGUCCCC	17	17	8087.93	98.758	16586.6	233.018	experimental
514	he_9047	CUUUAACGAAGAUCCAUUGGAGGGCA	17	18	1229.05	57.4406	1689.54	48.0248	experimental
515	he_29981	AAUUUUUAAUGCAGAAGUUUGAAUGAAG	17	19	106.694	5.50014	33.0278	3.25966	experimental
516	he_42318	ACUGUGUGCUGAUUGUCACGUUCUGAUU	17	20	92.4722	5.11084	142.361	22.1581	experimental
517	hsa-5S-b3		17	21	2736.97	99.932	4760.7	117.443	control	control_biosequences	LC Internal Use
518	xbz_26370	CUGGGAGAAGGCUGUUUACU	17	22	128.176	10.0919	42.2778	5.93081	experimental
519	he_18321	UACUUGUUUUAGGAGUAUCUUAA	17	23	102.565	6.89341	31.6296	2.70546	experimental
520	xbz_3740	AGGUUGGGAUCGGUUGCAAUGCU	17	24	204.565	16.0544	38.8426	4.96561	experimental
521	he_44031	CUCAAACUUGUUGGAGUAGGC	17	25	164.676	11.4979	63.213	8.56755	experimental
522	he_6833	UAAGGUGCAUCUAGUGCAGAU	17	26	143.583	8.40018	81.9537	8.96867	experimental
523	he_40162	GAGAGGUGUAGAAUAAGUGGGAGGUCCCC	17	27	9145.38	129.431	20077.4	335.591	experimental
524	he_9047	CUUUAACGAAGAUCCAUUGGAGGGCA	17	28	1382.49	33.0385	1994.81	101.967	experimental
525	he_29981	AAUUUUUAAUGCAGAAGUUUGAAUGAAG	17	29	129.981	5.94835	32.787	2.59781	experimental
526	he_42318	ACUGUGUGCUGAUUGUCACGUUCUGAUU	17	30	122.75	4.12452	173.639	13.4355	experimental
527	hsa-5S-b3		17	31	3527.62	70.3606	5547.18	187.391	control	control_biosequences	LC Internal Use
528	hsa-5S-b4		18	1	1270.41	42.552	2206.23	70.8758	control	control_biosequences	LC Internal Use
529	xbz_23536	UGAGGUAGUAGUUUGUACAGUU	18	2	2018.5	76.4346	9966.94	272.558	experimental
530	he_25083	AGAGGUAGUAGGUUGCAUAGUU	18	3	6510.65	93.4693	21496.5	551.801	experimental
531	xbz_11034	UGAGAACUGAAUUCCAUGGGUU	18	4	7966.91	107.083	20875.2	396.895	experimental
532	he_52217	CAAUUUAGUGUGUGUGAUAUU	18	5	118.407	7.45082	36.7685	4.53565	experimental
533	he_23269	UUUUUCAUUAUUGCUCCUGACC	18	6	130.806	9.76017	37.9167	2.07848	experimental
534	he_40174	CUGACGUGGAGCCAGGCGUGGAAUGCG	18	7	1381.85	58.0768	5842.07	142.578	experimental
535	he_9053	CUAGAGGUGAAAUUCUUGGACCGGCG	18	8	917.963	20.8367	1127.94	41.9389	experimental
536	he_28411	UUAGAGAUUUUGGAGGAGUAAA	18	9	115	6.70333	37.6944	3.80226	experimental
537	he_36935	GGGCUGUGAUGUUUAUUAGCUUCUGAGCUC	18	10	112.296	4.6146	33.6019	1.70727	experimental
538	hsa-5S-b4		18	11	1130.69	33.2334	1832.35	59.3999	control	control_biosequences	LC Internal Use
539	xbz_23536	UGAGGUAGUAGUUUGUACAGUU	18	12	1807.85	57.2451	8535.21	259.853	experimental
540	he_25083	AGAGGUAGUAGGUUGCAUAGUU	18	13	5909.44	86.1525	18680.9	125.676	experimental
541	xbz_11034	UGAGAACUGAAUUCCAUGGGUU	18	14	6890.64	109.488	18476.4	159.306	experimental
542	he_52217	CAAUUUAGUGUGUGUGAUAUU	18	15	108.731	5.48678	39.8333	3.88743	experimental
543	he_23269	UUUUUCAUUAUUGCUCCUGACC	18	16	118.241	4.94809	38.5278	1.6881	experimental
544	he_40174	CUGACGUGGAGCCAGGCGUGGAAUGCG	18	17	1385.06	46.0073	5988.1	103.858	experimental
545	he_9053	CUAGAGGUGAAAUUCUUGGACCGGCG	18	18	890.907	40.6424	1136.37	49.1037	experimental
546	he_28411	UUAGAGAUUUUGGAGGAGUAAA	18	19	101.657	5.27055	33.5741	2.00562	experimental
547	he_36935	GGGCUGUGAUGUUUAUUAGCUUCUGAGCUC	18	20	100.769	4.35054	33.9537	2.18912	experimental
548	hsa-5S-b4		18	21	1128.29	40.4505	1797.44	56.5798	control	control_biosequences	LC Internal Use
549	xbz_23536	UGAGGUAGUAGUUUGUACAGUU	18	22	1881.47	72.8926	8546.09	162.344	experimental
550	he_25083	AGAGGUAGUAGGUUGCAUAGUU	18	23	6133.43	161.039	19444.4	307.313	experimental
551	xbz_11034	UGAGAACUGAAUUCCAUGGGUU	18	24	7395.47	75.0827	19980.9	261.71	experimental
552	he_52217	CAAUUUAGUGUGUGUGAUAUU	18	25	116.157	5.43468	35.8426	2.54368	experimental
553	he_23269	UUUUUCAUUAUUGCUCCUGACC	18	26	132.75	6.18579	40.1759	3.57256	experimental
554	he_40174	CUGACGUGGAGCCAGGCGUGGAAUGCG	18	27	1552.32	62.1663	6925.35	153.263	experimental
555	he_9053	CUAGAGGUGAAAUUCUUGGACCGGCG	18	28	1053.15	33.138	1387.68	55.3801	experimental
556	he_28411	UUAGAGAUUUUGGAGGAGUAAA	18	29	129.769	9.17596	33.0093	2.79015	experimental
557	he_36935	GGGCUGUGAUGUUUAUUAGCUUCUGAGCUC	18	30	125.046	5.17973	33	2.20025	experimental
558	hsa-5S-b4		18	31	1440	44.5914	2082.88	90.4766	control	control_biosequences	LC Internal Use
559	hsa-5S-b5		19	1	5503.37	65.995	8134.95	173.842	control	control_biosequences	LC Internal Use
560	xbz_23920	GGUGGGAAAGCAGGACUU	19	2	126.926	6.83409	37.8611	3.74779	experimental
561	he_20271	GCGCCCAGGGCGCACCACCGGCCCG	19	3	562.824	30.1699	845.148	57.6645	experimental
562	xbz_3731	CAAAGUGCUUACAGUGCAGGUAG	19	4	742.583	22.9803	2551.47	113.142	experimental
563	he_49813	UAUGGCACUGGUAGAAUUCACUG	19	5	525.028	20.3192	688.065	23.2143	experimental
564	he_25080	UGAGGUAGUAGGUUGUAUAGUUUU	19	6	7211.34	214.865	21360.9	108.73	experimental
565	he_40343	AAGCAUUGGUGGUUCAGUGGUAGAAUUC	19	7	28919.4	294.684	31760.5	359.553	experimental
566	he_9090	AGGUGGAGCACCAGGGCACGUGUUAG	19	8	576.519	37.1069	2856.21	97.1937	experimental
567	he_48746	GUUGUCUGCUAGAUCAUGGUUUG	19	9	126.38	9.70569	50.463	4.18146	experimental
568	he_32697	UUUUUGGCCAAGGGUAUCUUAAACAA	19	10	111.185	5.01427	33.9722	1.61453	experimental
569	hsa-5S-b5		19	11	4734.94	70.2171	6351.31	114.004	control	control_biosequences	LC Internal Use
570	xbz_23920	GGUGGGAAAGCAGGACUU	19	12	112.528	6.12404	38.6667	2.30805	experimental
571	he_20271	GCGCCCAGGGCGCACCACCGGCCCG	19	13	494.324	24.4211	861.019	67.002	experimental
572	xbz_3731	CAAAGUGCUUACAGUGCAGGUAG	19	14	635.778	23.3712	2364.16	60.8346	experimental
573	he_49813	UAUGGCACUGGUAGAAUUCACUG	19	15	485.25	21.37	666.111	31.3894	experimental
574	he_25080	UGAGGUAGUAGGUUGUAUAGUUUU	19	16	6490.26	100.027	20753.8	168.504	experimental
575	he_40343	AAGCAUUGGUGGUUCAGUGGUAGAAUUC	19	17	26963.3	179.615	30781.1	179.871	experimental
576	he_9090	AGGUGGAGCACCAGGGCACGUGUUAG	19	18	549.176	13.7765	2832.94	72.8536	experimental
577	he_48746	GUUGUCUGCUAGAUCAUGGUUUG	19	19	117.315	10.1398	45.2315	2.9564	experimental
578	he_32697	UUUUUGGCCAAGGGUAUCUUAAACAA	19	20	104.63	3.4576	33.2037	2.42941	experimental
579	hsa-5S-b5		19	21	4815.96	96.385	6068	122.525	control	control_biosequences	LC Internal Use
580	xbz_23920	GGUGGGAAAGCAGGACUU	19	22	123.787	8.67056	35.6481	3.4811	experimental
581	he_20271	GCGCCCAGGGCGCACCACCGGCCCG	19	23	542.509	17.4974	828.407	49.9562	experimental
582	xbz_3731	CAAAGUGCUUACAGUGCAGGUAG	19	24	699.88	26.7912	2436.91	94.5849	experimental
583	he_49813	UAUGGCACUGGUAGAAUUCACUG	19	25	541.991	30.3852	744.315	56.1531	experimental
584	he_25080	UGAGGUAGUAGGUUGUAUAGUUUU	19	26	7498.03	108.602	24199.4	329.629	experimental
585	he_40343	AAGCAUUGGUGGUUCAGUGGUAGAAUUC	19	27	31245.1	205.12	38337.7	488.837	experimental
586	he_9090	AGGUGGAGCACCAGGGCACGUGUUAG	19	28	648.806	29.1353	3440.13	101.871	experimental
587	he_48746	GUUGUCUGCUAGAUCAUGGUUUG	19	29	138.954	6.3044	50.9907	5.06314	experimental
588	he_32697	UUUUUGGCCAAGGGUAUCUUAAACAA	19	30	134.444	6.18157	32.9167	1.94852	experimental
589	hsa-5S-b5		19	31	5729.34	123.811	7113.42	180.901	control	control_biosequences	LC Internal Use
590	hsa-5S-b6		20	1	9517.14	214.29	20651.1	270.797	control	control_biosequences	LC Internal Use
591	xbz_20219	GUUUCUCAUAUCAUUGGUCGUGG	20	2	4469.03	170.96	1172.25	80.3404	experimental
592	he_2066	CAUAACUUGACCUCUCUGACUA	20	3	5432.12	314.986	79.9907	11.7438	experimental
593	xbz_13910	ACCACUGACCGUUGACUGUAC	20	4	130.435	7.40077	39.75	3.03908	experimental
594	he_30405	CUGUGCGUGUGACAGCGGCUGA	20	5	276.833	17.6558	348.213	24.7507	experimental
595	he_12204	UGAGGUAGGAGGUUGUAUAGUU	20	6	4349.19	180.406	11790.2	219.189	experimental
596	he_40709	GGGGGUAUAGCUUAGUGGUAGAGUAUUUG	20	7	23108.6	488.29	17583.8	164.913	experimental
597	he_9463	AUCGCUGUACGGCCUUGAUGAAAGCA	20	8	229.852	10.7866	7983.74	137.546	experimental
598	he_39410	UGAUUUGUCUGGAGGAAUGAUU	20	9	112.852	5.25217	35.5926	3.22964	experimental
599	he_51658	AUUGGUACUGAAAAGAGACGUAGUAAAU	20	10	112.954	3.53985	34.6574	1.72482	experimental
600	hsa-5S-b6		20	11	8306.11	131.773	16196.9	140.302	control	control_biosequences	LC Internal Use
601	xbz_20219	GUUUCUCAUAUCAUUGGUCGUGG	20	12	4147.76	119.122	1117.56	66.9489	experimental
602	he_2066	CAUAACUUGACCUCUCUGACUA	20	13	5603.2	315.848	91.8333	11.3224	experimental
603	xbz_13910	ACCACUGACCGUUGACUGUAC	20	14	114.907	5.80128	39.1204	2.79425	experimental
604	he_30405	CUGUGCGUGUGACAGCGGCUGA	20	15	239.981	13.9659	341.472	18.0288	experimental
605	he_12204	UGAGGUAGGAGGUUGUAUAGUU	20	16	4001.28	104.827	11960	364.937	experimental
606	he_40709	GGGGGUAUAGCUUAGUGGUAGAGUAUUUG	20	17	21854.5	271.72	17349.4	262.81	experimental
607	he_9463	AUCGCUGUACGGCCUUGAUGAAAGCA	20	18	219.759	16.2353	7736.72	101.664	experimental
608	he_39410	UGAUUUGUCUGGAGGAAUGAUU	20	19	105.889	7.39959	35.537	3.27673	experimental
609	he_51658	AUUGGUACUGAAAAGAGACGUAGUAAAU	20	20	106.37	8.51342	32.5741	1.88056	experimental
610	hsa-5S-b6		20	21	8477.07	181.478	15850.4	136.807	control	control_biosequences	LC Internal Use
611	xbz_20219	GUUUCUCAUAUCAUUGGUCGUGG	20	22	4320.2	117.851	1130.14	62.6591	experimental
612	he_2066	CAUAACUUGACCUCUCUGACUA	20	23	5956.78	310.03	94.6574	14.968	experimental
613	xbz_13910	ACCACUGACCGUUGACUGUAC	20	24	131.954	6.6352	38.6759	2.86072	experimental
614	he_30405	CUGUGCGUGUGACAGCGGCUGA	20	25	264.657	20.0076	364.5	31.5783	experimental
615	he_12204	UGAGGUAGGAGGUUGUAUAGUU	20	26	4488.25	80.2599	13522.6	370.802	experimental
616	he_40709	GGGGGUAUAGCUUAGUGGUAGAGUAUUUG	20	27	25341.5	202.673	20722.6	402.325	experimental
617	he_9463	AUCGCUGUACGGCCUUGAUGAAAGCA	20	28	252.769	7.85453	9532.63	170.473	experimental
618	he_39410	UGAUUUGUCUGGAGGAAUGAUU	20	29	125.722	6.02616	33.8333	2.18961	experimental
619	he_51658	AUUGGUACUGAAAAGAGACGUAGUAAAU	20	30	131.259	3.42168	34.1481	1.94703	experimental
620	hsa-5S-b6		20	31	10472.3	144.298	18523.6	134.587	control	control_biosequences	LC Internal Use
621	TU4	UCUGACAAAUGAACAAGUCAUUCUAUUUACUG	21	1	114.62	5.72863	32.3704	2.2448	experimental
622	xbz_27158	UAAGAUGGUAGCCAUCAUUA	21	2	124.194	7.11384	32.3796	2.05857	experimental
623	he_5727	UGAGGUAGUAGUUUGUGCUGUU	21	3	2554.23	82.2552	11224.7	206.494	experimental
624	xbz_11720	AGCAGAGUAGAGCAGUUGGAAGA	21	4	7032.83	104.164	9408.02	265.22	experimental
625	he_28827	UAGCACCAUUUGAAAUCAGUGUUU	21	5	126.639	9.26097	231.935	20.4461	experimental
626	he_26153	UGUCAGUUUGUCAAAUACCCCA	21	6	127.963	6.79049	41	4.11289	experimental
627	he_40719	CAAUGGUGGUUCAGUGGUAGAAUUCUC	21	7	28574.3	404.445	30949.6	426.235	experimental
628	he_9626	CCAUAUGAUGUGACCUUACUCAACUGAUU	21	8	111.13	4.24945	50.0556	4.29917	experimental
629	he_46082	UUACAGUUGUUCAACCAGUUACU	21	9	119.231	4.5644	33.8241	2.09953	experimental
630	he_37784	AAACAGUUGUAAAAUAAUGAAGGUAG	21	10	112.713	6.00164	34.3056	1.43689	experimental
631	TU4	UCUGACAAAUGAACAAGUCAUUCUAUUUACUG	21	11	108.815	3.8938	35.6019	1.95242	experimental
632	xbz_27158	UAAGAUGGUAGCCAUCAUUA	21	12	113.843	5.10664	34.6111	2.30332	experimental
633	he_5727	UGAGGUAGUAGUUUGUGCUGUU	21	13	2372.21	42.2571	10439.5	157.022	experimental
634	xbz_11720	AGCAGAGUAGAGCAGUUGGAAGA	21	14	6095.16	136.221	8891.08	150.473	experimental
635	he_28827	UAGCACCAUUUGAAAUCAGUGUUU	21	15	116.852	8.15139	235.157	20.4844	experimental
636	he_26153	UGUCAGUUUGUCAAAUACCCCA	21	16	120.657	6.34692	41.9907	4.87123	experimental
637	he_40719	CAAUGGUGGUUCAGUGGUAGAAUUCUC	21	17	26957.8	178.335	29984.2	294.425	experimental
638	he_9626	CCAUAUGAUGUGACCUUACUCAACUGAUU	21	18	111.833	7.87697	52.537	4.50633	experimental
639	he_46082	UUACAGUUGUUCAACCAGUUACU	21	19	104.528	4.87308	33.5463	1.99244	experimental
640	he_37784	AAACAGUUGUAAAAUAAUGAAGGUAG	21	20	103.417	5.12849	33.287	2.66529	experimental
641	rt_chr1_C_1	AUUUAGGAUCCAAACCCAGGUUGUCAUGGCGG	21	21	159.519	9.90561	43.4352	5.15964	experimental
642	xbz_27158	UAAGAUGGUAGCCAUCAUUA	21	22	107.944	7.33553	31.1019	2.6046	experimental
643	he_5727	UGAGGUAGUAGUUUGUGCUGUU	21	23	2387.12	91.7941	10458.6	175.612	experimental
644	xbz_11720	AGCAGAGUAGAGCAGUUGGAAGA	21	24	6535.64	140.071	9073.68	143.039	experimental
645	he_28827	UAGCACCAUUUGAAAUCAGUGUUU	21	25	128.907	6.70686	231.176	19.9644	experimental
646	he_26153	UGUCAGUUUGUCAAAUACCCCA	21	26	135.278	6.15354	36.463	1.74777	experimental
647	he_40719	CAAUGGUGGUUCAGUGGUAGAAUUCUC	21	27	31468.9	211.392	37591.7	693.531	experimental
648	he_9626	CCAUAUGAUGUGACCUUACUCAACUGAUU	21	28	129.046	6.25529	52.6667	4.87028	experimental
649	he_46082	UUACAGUUGUUCAACCAGUUACU	21	29	132.685	8.11788	34.6019	3.43957	experimental
650	he_37784	AAACAGUUGUAAAAUAAUGAAGGUAG	21	30	129.528	6.74566	31.9352	2.44672	experimental
651	TU4	UCUGACAAAUGAACAAGUCAUUCUAUUUACUG	21	31	132.222	4.24117	31.9352	1.38262	experimental
652	TU531	UUUGAAUAUCUUUCUAAAUUUUAUCUGCUACA	22	1	114.889	6.83358	30.5926	2.67923	experimental
653	xbz_26095	GUUUCCGUAGUGUAGUGGUUAUU	22	2	6534.69	183.046	6838.82	221.682	experimental
654	he_21987	AGGUUAAUCAUGAACUUGAA	22	3	114.315	8.53651	30.6944	2.10233	experimental
655	xbz_11338	UUCAAAGGUGAACGUUUU	22	4	118.944	4.31869	32.2593	1.83614	experimental
656	he_53516	CAGCAGCAAUUCAUGUUUUGA	22	5	112.333	6.07123	34.1574	1.34763	experimental
657	he_10364	CAACACCAGUCGAUGGGCUGUC	22	6	142.685	10.6873	41.5648	5.50153	experimental
658	he_40953	GGUCAGUCGGUCCUGAGAGAUGGGCGAG	22	7	3737.75	77.2522	9699.1	169.696	experimental
659	he_9627	UGGAAAGGAUGAAGAGCUGACUGAUGG	22	8	152.509	10.4143	66.8426	8.03981	experimental
660	he_27299	GAGGCCUCUUAUUUCCUGAGGCUA	22	9	121.87	5.07162	37.0926	4.2636	experimental
661	he_41230	UAACAUGGACUGGGAUAGAUUAAAGGCA	22	10	116.546	6.73446	35.213	2.30421	experimental
662	TU531	UUUGAAUAUCUUUCUAAAUUUUAUCUGCUACA	22	11	112.722	6.18686	30.8704	1.72444	experimental
663	xbz_26095	GUUUCCGUAGUGUAGUGGUUAUU	22	12	5953.07	198.958	6171.56	274.108	experimental
664	he_21987	AGGUUAAUCAUGAACUUGAA	22	13	108.333	5.63036	34.3241	2.14358	experimental
665	xbz_11338	UUCAAAGGUGAACGUUUU	22	14	104.361	6.24942	33.1944	2.2732	experimental
666	he_53516	CAGCAGCAAUUCAUGUUUUGA	22	15	106.815	8.34103	34.4907	1.89192	experimental
667	he_10364	CAACACCAGUCGAUGGGCUGUC	22	16	132.833	12.0672	42.287	3.83552	experimental
668	he_40953	GGUCAGUCGGUCCUGAGAGAUGGGCGAG	22	17	3525.56	46.0677	9839.44	101.871	experimental
669	he_9627	UGGAAAGGAUGAAGAGCUGACUGAUGG	22	18	134.185	9.52728	72.6111	7.50306	experimental
670	he_27299	GAGGCCUCUUAUUUCCUGAGGCUA	22	19	108.861	8.55052	34.3056	2.29367	experimental
671	he_41230	UAACAUGGACUGGGAUAGAUUAAAGGCA	22	20	110.13	6.06213	34.9352	3.45944	experimental
672	rt_chr13_E_2_host	CACCUCAGCCUCCUAAAAUGCUGGGAUUACAG	22	21	113.38	4.12587	33.7593	2.72019	experimental
673	xbz_26095	GUUUCCGUAGUGUAGUGGUUAUU	22	22	6044.39	184.162	6020.76	273.949	experimental
674	he_21987	AGGUUAAUCAUGAACUUGAA	22	23	109.556	6.53865	32.0833	2.32871	experimental
675	xbz_11338	UUCAAAGGUGAACGUUUU	22	24	115.694	6.51305	33.6111	2.77449	experimental
676	he_53516	CAGCAGCAAUUCAUGUUUUGA	22	25	118.944	3.89544	34.6019	1.87925	experimental
677	he_10364	CAACACCAGUCGAUGGGCUGUC	22	26	150.926	11.8989	40.9352	4.00997	experimental
678	he_40953	GGUCAGUCGGUCCUGAGAGAUGGGCGAG	22	27	4149.44	76.3065	11429.4	207.376	experimental
679	he_9627	UGGAAAGGAUGAAGAGCUGACUGAUGG	22	28	167.185	7.28992	72.7037	6.58838	experimental
680	he_27299	GAGGCCUCUUAUUUCCUGAGGCUA	22	29	131.389	6.86428	34.3704	1.6833	experimental
681	he_41230	UAACAUGGACUGGGAUAGAUUAAAGGCA	22	30	136.889	4.99595	35.4074	2.90033	experimental
682	TU531	UUUGAAUAUCUUUCUAAAUUUUAUCUGCUACA	22	31	131.778	5.53043	30.4074	2.13575	experimental
683	TU540	AAGAACUAGUAAAUCCUAAGAGAGAAUUAGGA	23	1	118.019	6.84267	30.9074	1.79583	experimental
684	xbz_27866	AACGGGCUUGGCGGAA	23	2	5058.31	108.798	6786.33	184.314	experimental
685	he_14423	AGCAGCAUUGUACAGGGCUAUGAAA	23	3	663.213	32.9438	1088.08	58.6769	experimental
686	xbz_13753	UGAGGUAGUAGGUUGUAUAGUUUU	23	4	7556.57	81.6346	22200	304.607	experimental
687	he_33255	AGCUGUUGUGAGUCAGGCCG	23	5	128.778	7.65046	37.0833	2.65149	experimental
688	he_12052	CUGGGAUCUCCGGGGUCUUGGUU	23	6	140.269	8.96786	40.0741	3.05312	experimental
689	he_40976	UGGAUAUGAUGACUGAUUACCUGAGA	23	7	156.528	7.95367	116.731	9.73538	experimental
690	he_9634	UCCAGGGUUCAAGUCCCUGUUCGGGCGGCA	23	8	35478.3	281.637	14077.4	182.85	experimental
691	he_28961	GGUUCCAUUGUGUAAUGGUUGGCACUCUGG	23	9	20523.1	150.313	22819.2	225.752	experimental
692	he_27778	AAGACCCUGGAGUUCAAAAAACUCUUG	23	10	115.278	3.64251	34.8611	1.52523	experimental
693	TU540	AAGAACUAGUAAAUCCUAAGAGAGAAUUAGGA	23	11	111.963	4.69823	34.8611	2.00214	experimental
694	xbz_27866	AACGGGCUUGGCGGAA	23	12	4576.72	150.417	6215.62	180.807	experimental
695	he_14423	AGCAGCAUUGUACAGGGCUAUGAAA	23	13	609.88	23.2948	1091.81	54.0395	experimental
696	xbz_13753	UGAGGUAGUAGGUUGUAUAGUUUU	23	14	6548.36	154.795	21375.8	376.043	experimental
697	he_33255	AGCUGUUGUGAGUCAGGCCG	23	15	115.278	6.63302	37.7407	2.40859	experimental
698	he_12052	CUGGGAUCUCCGGGGUCUUGGUU	23	16	123.741	6.18616	44.2037	3.95715	experimental
699	he_40976	UGGAUAUGAUGACUGAUUACCUGAGA	23	17	142.593	10.4881	124.389	11.2465	experimental
700	he_9634	UCCAGGGUUCAAGUCCCUGUUCGGGCGGCA	23	18	34973.4	288.619	14175.4	213.104	experimental
701	he_28961	GGUUCCAUUGUGUAAUGGUUGGCACUCUGG	23	19	19975.3	258.514	23127.6	204.569	experimental
702	he_27778	AAGACCCUGGAGUUCAAAAAACUCUUG	23	20	109.056	10.1832	33.5185	2.50413	experimental
703	rt_chr3_A_2	UCCUCACUUAAAAUCUUUGGUCCAUAAUAAAU	23	21	101.463	5.13632	31.8981	2.59381	experimental
704	xbz_27866	AACGGGCUUGGCGGAA	23	22	4753.34	95.5565	5840.6	113.166	experimental
705	he_14423	AGCAGCAUUGUACAGGGCUAUGAAA	23	23	581.398	21.3222	1049.69	57.3138	experimental
706	xbz_13753	UGAGGUAGUAGGUUGUAUAGUUUU	23	24	7082.34	145.3	21938.1	262.613	experimental
707	he_33255	AGCUGUUGUGAGUCAGGCCG	23	25	130.917	5.41394	39.0278	3.26825	experimental
708	he_12052	CUGGGAUCUCCGGGGUCUUGGUU	23	26	137.028	9.29019	41.1852	3.07279	experimental
709	he_40976	UGGAUAUGAUGACUGAUUACCUGAGA	23	27	167	8.25867	111.954	8.05748	experimental
710	he_9634	UCCAGGGUUCAAGUCCCUGUUCGGGCGGCA	23	28	41094.6	358.586	17478.8	267.682	experimental
711	he_28961	GGUUCCAUUGUGUAAUGGUUGGCACUCUGG	23	29	24334.9	216.726	28570.7	307.108	experimental
712	he_27778	AAGACCCUGGAGUUCAAAAAACUCUUG	23	30	134.093	5.94451	35.5185	3.0555	experimental
713	TU540	AAGAACUAGUAAAUCCUAAGAGAGAAUUAGGA	23	31	135.731	5.51227	32.6111	2.00389	experimental
714	TU541	CAAGGACUUAUUUAAAAGUGUUUUCAAGUCUG	24	1	119.676	7.14971	29.8704	1.98637	experimental
715	xbz_19551	UCAAGUGAAUGAUCAGCUU	24	2	114.102	6.76293	30.7315	1.88256	experimental
716	he_14422	AGCUUCUUUACAGUGCUGCCUUGU	24	3	121.574	7.10825	39.3889	3.72873	experimental
717	xbz_1241	AUCCUGCUCACAGCGCCA	24	4	373.778	20.742	181.019	14.3266	experimental
718	he_51982	CAACAAAUCACAGUCUGCCAUA	24	5	148.25	9.69355	40.1019	3.59111	experimental
719	he_9307	UACCACAGGGUAGAACCACGGAC	24	6	305.5	16.9659	125.537	11.1886	experimental
720	he_41259	ACAACCCCCACUGCUAAAUUUGACUGG	24	7	21276	265.98	8753.93	131.794	experimental
721	he_9638	GCUAAGGAAGUCCUGUGCUCAGUUUU	24	8	191.157	9.51355	45.7315	4.34194	experimental
722	he_52487	UGGACUUCUAGCUGAGCCUAGUGUGGUC	24	9	141.12	7.12206	38.25	2.59087	experimental
723	he_24730	AGGCAUUUGAAGGUGGAGAAGCUGGC	24	10	501.824	29.4059	412.861	33.0388	experimental
724	TU541	CAAGGACUUAUUUAAAAGUGUUUUCAAGUCUG	24	11	111.315	5.61981	32.7222	2.04543	experimental
725	xbz_19551	UCAAGUGAAUGAUCAGCUU	24	12	108.704	3.3967	33.9722	1.97866	experimental
726	he_14422	AGCUUCUUUACAGUGCUGCCUUGU	24	13	114.454	7.38701	42.1944	3.78501	experimental
727	xbz_1241	AUCCUGCUCACAGCGCCA	24	14	322.083	23.4485	203.852	23.7581	experimental
728	he_51982	CAACAAAUCACAGUCUGCCAUA	24	15	131.093	7.52881	39.6667	3.68883	experimental
729	he_9307	UACCACAGGGUAGAACCACGGAC	24	16	265.269	13.5306	127.963	12.4337	experimental
730	he_41259	ACAACCCCCACUGCUAAAUUUGACUGG	24	17	20283.7	161.58	8654.69	154.623	experimental
731	he_9638	GCUAAGGAAGUCCUGUGCUCAGUUUU	24	18	184.991	9.16158	45.5648	4.11124	experimental
732	he_52487	UGGACUUCUAGCUGAGCCUAGUGUGGUC	24	19	126.5	9.22664	39.9907	4.56213	experimental
733	he_24730	AGGCAUUUGAAGGUGGAGAAGCUGGC	24	20	486.676	34.7692	406.713	26.2362	experimental
734	chr11_A_6	UCUCAUUUUUCCUCUCUCAGUAUGUGGUACUA	24	21	104.213	4.84151	30.4907	2.36997	experimental
735	xbz_19551	UCAAGUGAAUGAUCAGCUU	24	22	104.148	4.82365	29.9722	2.02535	experimental
736	he_14422	AGCUUCUUUACAGUGCUGCCUUGU	24	23	118.343	6.59958	41.9074	6.48728	experimental
737	xbz_1241	AUCCUGCUCACAGCGCCA	24	24	350.019	13.0642	184.315	17.6098	experimental
738	he_51982	CAACAAAUCACAGUCUGCCAUA	24	25	145.12	11.0831	43.3704	5.38012	experimental
739	he_9307	UACCACAGGGUAGAACCACGGAC	24	26	300.602	23.8637	132.213	13.573	experimental
740	he_41259	ACAACCCCCACUGCUAAAUUUGACUGG	24	27	23724	148.129	9900.8	204.619	experimental
741	he_9638	GCUAAGGAAGUCCUGUGCUCAGUUUU	24	28	233.88	14.3095	47.037	3.58326	experimental
742	he_52487	UGGACUUCUAGCUGAGCCUAGUGUGGUC	24	29	155.75	8.82554	42.8426	4.3753	experimental
743	he_24730	AGGCAUUUGAAGGUGGAGAAGCUGGC	24	30	620.824	23.4811	473.648	24.8484	experimental
744	TU541	CAAGGACUUAUUUAAAAGUGUUUUCAAGUCUG	24	31	133.481	5.94599	30.1667	1.04568	experimental
745	TU556	CACGACAGUAAACGAUGUGGUACAAAAGCACU	25	1	118.167	5.35034	31.5741	2.42727	experimental
746	xbz_24742	AAAGGAAGAAAAGCAAUGCAUGU	25	2	117.102	6.38769	30.8704	2.24271	experimental
747	he_6004	UGAGGUAGUUGUUGUCUAGUU	25	3	118.204	7.61057	30.1481	1.56966	experimental
748	xbz_12465	AAGGAAAUUGUUUAGAU	25	4	114.907	7.04397	31.9259	2.42149	experimental
749	he_28710	CUCACUGAACAAUGAAUGCAA	25	5	124.639	5.72331	34.5926	2.1049	experimental
750	he_6014	UGGUUUUGUUUGGGUUUGUU	25	6	116.75	9.108	33.8796	2.32708	experimental
751	he_41264	CACAAAGAUGAGUGGUGAAAAUCUGAUC	25	7	142.435	6.51278	202.759	17.1529	experimental
752	he_9646	GCGUUGGUGGUAUAGUGGUAAGCAUAGCU	25	8	35086.5	197.072	24178.5	230.656	experimental
753	he_31221	UCUACAGUGCACGUGUCUCCAGU	25	9	220.806	13.9307	146.093	15.1722	experimental
754	he_26104	GGGGCUGGCUUUAGCUCAGCGGUUACUUCG	25	10	1728.92	42.4322	819.204	53.6584	experimental
755	TU556	CACGACAGUAAACGAUGUGGUACAAAAGCACU	25	11	112.519	3.7974	35.1759	2.30736	experimental
756	xbz_24742	AAAGGAAGAAAAGCAAUGCAUGU	25	12	107.037	2.40298	33.1944	2.8823	experimental
757	he_6004	UGAGGUAGUUGUUGUCUAGUU	25	13	107.833	5.65107	33.0093	2.25271	experimental
758	xbz_12465	AAGGAAAUUGUUUAGAU	25	14	99.8056	6.17268	32.5	2.08914	experimental
759	he_28710	CUCACUGAACAAUGAAUGCAA	25	15	110.324	4.99688	34.1111	2.05682	experimental
760	he_6014	UGGUUUUGUUUGGGUUUGUU	25	16	105.278	6.1505	33.7315	2.03982	experimental
761	he_41264	CACAAAGAUGAGUGGUGAAAAUCUGAUC	25	17	135.259	10.2149	214.037	17.2956	experimental
762	he_9646	GCGUUGGUGGUAUAGUGGUAAGCAUAGCU	25	18	34526.1	249.861	24391.6	327.409	experimental
763	he_31221	UCUACAGUGCACGUGUCUCCAGU	25	19	215.454	11.9378	146.315	14.1068	experimental
764	he_26104	GGGGCUGGCUUUAGCUCAGCGGUUACUUCG	25	20	1679.92	47.1645	791.963	44.7685	experimental
765	chr8_B_5	AAUAGCCCCCUCACCUUUAUCAUCUUUUAAAA	25	21	113.917	6.04056	31.6759	2.13921	experimental
766	xbz_24742	AAAGGAAGAAAAGCAAUGCAUGU	25	22	110.963	7.26395	30.1759	2.44502	experimental
767	he_6004	UGAGGUAGUUGUUGUCUAGUU	25	23	105.778	7.06622	31.3333	1.67444	experimental
768	xbz_12465	AAGGAAAUUGUUUAGAU	25	24	107.833	5.9145	32.6852	1.70567	experimental
769	he_28710	CUCACUGAACAAUGAAUGCAA	25	25	125.407	8.98185	34.4722	2.56671	experimental
770	he_6014	UGGUUUUGUUUGGGUUUGUU	25	26	119.278	5.5901	32.8981	1.93801	experimental
771	he_41264	CACAAAGAUGAGUGGUGAAAAUCUGAUC	25	27	156.667	9.01505	206.204	21.1429	experimental
772	he_9646	GCGUUGGUGGUAUAGUGGUAAGCAUAGCU	25	28	39979.7	432.644	29813.3	435.269	experimental
773	he_31221	UCUACAGUGCACGUGUCUCCAGU	25	29	262.694	18.9749	166.037	14.5415	experimental
774	he_26104	GGGGCUGGCUUUAGCUCAGCGGUUACUUCG	25	30	2151.15	48.4496	964.676	44.0358	experimental
775	TU556	CACGACAGUAAACGAUGUGGUACAAAAGCACU	25	31	141.361	5.18347	31.6759	1.77642	experimental
776	TU558	GAAAUACCAAAUAAAAUAGAUUAUCUUAAAAG	26	1	113.574	7.16456	29.3704	1.66095	experimental
777	xbz_16624	ACUCGGCGUGGCGUCGGUCGUGG	26	2	283.731	21.2038	225.667	23.9532	experimental
778	he_9859	UGAGGGGCAGAGAGCGAGACUUU	26	3	1014.12	31.4725	857.741	64.5078	experimental
779	xbz_12959	CCACCCCACGUCUCCUCUCG	26	4	148.139	8.15556	43.037	4.81611	experimental
780	he_42327	GUUUGAUUGCUGUCGGAGCCA	26	5	123.444	4.63294	34.6204	2.5894	experimental
781	he_532	CUUUCAGUCGGAUGUUUACAGC	26	6	198.231	10.7526	121.343	19.4994	experimental
782	he_41333	CUCCCGGAGCGGGACCGGGUCGGAGGAU	26	7	2009.96	46.56	1671.12	68.7275	experimental
783	he_9721	AUAACUGACGAAGACUACUCCUGUCUGAU	26	8	146.593	4.13564	7142.27	116.127	experimental
784	he_28948	ACUGGCUAGGGAAAAUGAUUGG	26	9	124.472	4.226	39.8056	4.5518	experimental
785	he_2031	CCUCCCACUGCUAAAUUUGACUGGCUA	26	10	22673.4	165.838	9370.81	153.711	experimental
786	TU558	GAAAUACCAAAUAAAAUAGAUUAUCUUAAAAG	26	11	104.639	5.68069	33	1.33255	experimental
787	xbz_16624	ACUCGGCGUGGCGUCGGUCGUGG	26	12	263.926	12.1914	205.176	30.3712	experimental
788	he_9859	UGAGGGGCAGAGAGCGAGACUUU	26	13	912.657	24.3703	908.62	54.3054	experimental
789	xbz_12959	CCACCCCACGUCUCCUCUCG	26	14	134.509	7.01466	40.6296	5.87819	experimental
790	he_42327	GUUUGAUUGCUGUCGGAGCCA	26	15	113.315	6.7112	34.2778	2.55348	experimental
791	he_532	CUUUCAGUCGGAUGUUUACAGC	26	16	179.907	16.1538	137.741	11.9112	experimental
792	he_41333	CUCCCGGAGCGGGACCGGGUCGGAGGAU	26	17	1918.1	51.7485	1685.2	45.8695	experimental
793	he_9721	AUAACUGACGAAGACUACUCCUGUCUGAU	26	18	142.852	13.1347	7200.72	133.717	experimental
794	he_28948	ACUGGCUAGGGAAAAUGAUUGG	26	19	119.657	8.84145	37.5463	3.67203	experimental
795	he_2031	CCUCCCACUGCUAAAUUUGACUGGCUA	26	20	22065.9	270.181	9072.59	222.988	experimental
796	chr12_D_5	UUUUAUGGUAUUUUGCUGAGAGCAGUGAACAA	26	21	107.889	6.23726	31.1204	2.14309	experimental
797	xbz_16624	ACUCGGCGUGGCGUCGGUCGUGG	26	22	262.185	23.3723	185.954	27.335	experimental
798	he_9859	UGAGGGGCAGAGAGCGAGACUUU	26	23	925.056	31.9389	847.269	65.5006	experimental
799	xbz_12959	CCACCCCACGUCUCCUCUCG	26	24	145.481	8.74721	43.1019	5.22206	experimental
800	he_42327	GUUUGAUUGCUGUCGGAGCCA	26	25	126.287	8.78938	36.4259	2.49187	experimental
801	he_532	CUUUCAGUCGGAUGUUUACAGC	26	26	199.185	14.0813	128.361	12.2653	experimental
802	he_41333	CUCCCGGAGCGGGACCGGGUCGGAGGAU	26	27	2214.56	31.6748	1891.75	79.5631	experimental
803	he_9721	AUAACUGACGAAGACUACUCCUGUCUGAU	26	28	166.37	10.776	8126.27	209.077	experimental
804	he_28948	ACUGGCUAGGGAAAAUGAUUGG	26	29	144.046	5.69372	38.8704	2.65137	experimental
805	he_2031	CCUCCCACUGCUAAAUUUGACUGGCUA	26	30	27993.1	150.549	10989.2	164.61	experimental
806	TU558	GAAAUACCAAAUAAAAUAGAUUAUCUUAAAAG	26	31	134.574	6.46949	30.75	1.96286	experimental
807	TU583	UCCUUACCACACCGUGGACGAGAUCAACCUUA	27	1	118.463	5.15992	31.3704	1.8825	experimental
808	xbz_25639	UUAGACGGGCUCACAA	27	2	4754.55	141.85	4112.35	67.9632	experimental
809	he_9860	AGCUCGGUCUGAGGCCCCUCAGU	27	3	297.685	27.2591	194.509	33.5547	experimental
810	xbz_3737	UAAAGUGCUUAUAGUGCAGGUAG	27	4	714.481	23.9237	2305.32	48.8136	experimental
811	he_51342	UGUAAACAUCCUACACUCAGCU	27	5	2564.22	55.2558	4275.03	156.774	experimental
812	he_15398	CAGUGCAAUGAUGAAAGGGCAU	27	6	252.139	15.0541	238.861	20.8342	experimental
813	he_41343	GAGACGAGACGCGCCCCUCCCACGCGG	27	7	162.769	14.8938	58.2685	8.9762	experimental
814	he_9772	CAGUUGAACAUGGGUCAGUCGGUCCU	27	8	1355.37	29.1104	4557.98	114.834	experimental
815	he_32438	UCGUCAUGAGACAGUUCGGUC	27	9	132.917	8.84564	47.8241	5.62177	experimental
816	he_16903	CAAGAAGAUGAUAGAGGGUUUCUGAUU	27	10	116.38	6.32562	34.5185	2.1113	experimental
817	TU583	UCCUUACCACACCGUGGACGAGAUCAACCUUA	27	11	113.769	4.51499	32.7037	3.2791	experimental
818	xbz_25639	UUAGACGGGCUCACAA	27	12	4272.54	87.477	4133.45	145.807	experimental
819	he_9860	AGCUCGGUCUGAGGCCCCUCAGU	27	13	281.593	17.306	173.204	17.8031	experimental
820	xbz_3737	UAAAGUGCUUAUAGUGCAGGUAG	27	14	617.556	31.3969	2304.27	43.9374	experimental
821	he_51342	UGUAAACAUCCUACACUCAGCU	27	15	2231.54	66.7116	4541.67	151.197	experimental
822	he_15398	CAGUGCAAUGAUGAAAGGGCAU	27	16	216.898	11.4238	235.194	19.5216	experimental
823	he_41343	GAGACGAGACGCGCCCCUCCCACGCGG	27	17	158.065	11.4885	60.5833	7.46471	experimental
824	he_9772	CAGUUGAACAUGGGUCAGUCGGUCCU	27	18	1307.11	36.9145	4407.17	102.559	experimental
825	he_32438	UCGUCAUGAGACAGUUCGGUC	27	19	118.213	9.13558	42.75	6.17521	experimental
826	he_16903	CAAGAAGAUGAUAGAGGGUUUCUGAUU	27	20	107.935	7.84103	34.5093	1.85702	experimental
827	rt_chr1_C_1_host	UUCCAGUAUUUCAAUUGGUCUCCUCCCCUCAU	27	21	107.648	8.20225	29.7037	1.91531	experimental
828	xbz_25639	UUAGACGGGCUCACAA	27	22	4443.84	106.191	3964.48	80.3901	experimental
829	he_9860	AGCUCGGUCUGAGGCCCCUCAGU	27	23	294.75	16.4602	173.481	14.0948	experimental
830	xbz_3737	UAAAGUGCUUAUAGUGCAGGUAG	27	24	687.676	25.5935	2212.15	84.9883	experimental
831	he_51342	UGUAAACAUCCUACACUCAGCU	27	25	2538.51	81.5626	4531.93	166.845	experimental
832	he_15398	CAGUGCAAUGAUGAAAGGGCAU	27	26	245.528	19.6946	233.213	16.0368	experimental
833	he_41343	GAGACGAGACGCGCCCCUCCCACGCGG	27	27	170.731	12.7826	52.1019	5.45489	experimental
834	he_9772	CAGUUGAACAUGGGUCAGUCGGUCCU	27	28	1520.73	61.5316	5015.2	91.1871	experimental
835	he_32438	UCGUCAUGAGACAGUUCGGUC	27	29	146.972	5.92391	50.0093	7.19747	experimental
836	he_16903	CAAGAAGAUGAUAGAGGGUUUCUGAUU	27	30	124.509	7.59549	32.0278	2.05739	experimental
837	TU583	UCCUUACCACACCGUGGACGAGAUCAACCUUA	27	31	129.87	4.43245	31.2685	1.62116	experimental
838	TU589	AUGACCUAGUAGAGCUCACCAGAUCUGGCCCC	28	1	128.259	9.0175	31.6574	3.0484	experimental
839	xbz_28039	GAUGAUAGUGGUGUUCAUGU	28	2	120.981	8.68018	32.2685	1.65539	experimental
840	he_17443	ACCUUCUUGUAUAAGCACUG	28	3	113.954	9.14206	32.8519	1.98506	experimental
841	xbz_9572	CACGCUCAUGCACACACCCACA	28	4	600.028	25.2548	568.852	39.3973	experimental
842	he_30220	UUGGGGAAACGGCCGCUGAGUGA	28	5	146.139	6.44815	56.5648	5.15783	experimental
843	xbz_15625	ACCCUGUGGUCUAGUGGUUAGGAGUUGG	28	6	35480.7	492.268	20037.9	203.958	experimental
844	he_41514	UCCCUGUAUUCGAAAGUGAUCGUGGGCUG	28	7	136.602	8.6769	45.5278	5.55593	experimental
845	he_9775	GACCUCGUGGCGCAAUGGUAGCGCGUCUG	28	8	4850.84	127.226	4873.42	142.287	experimental
846	he_31201	UCUCAGGAGUAAAGACAGAGUU	28	9	117.759	8.85487	36.0833	1.44122	experimental
847	he_1586	GGUUGGUGGUUCGAUCCCACCCAGGGACG	28	10	17533.6	132.25	10305.1	162.663	experimental
848	TU589	AUGACCUAGUAGAGCUCACCAGAUCUGGCCCC	28	11	118.87	5.16113	33.9074	1.13184	experimental
849	xbz_28039	GAUGAUAGUGGUGUUCAUGU	28	12	112.417	4.9693	36.3981	1.49103	experimental
850	he_17443	ACCUUCUUGUAUAAGCACUG	28	13	110.722	5.43927	35.5185	2.2856	experimental
851	xbz_9572	CACGCUCAUGCACACACCCACA	28	14	535.731	33.3614	559.037	46.1651	experimental
852	he_30220	UUGGGGAAACGGCCGCUGAGUGA	28	15	130.5	11.923	53.2315	6.58461	experimental
853	xbz_15625	ACCCUGUGGUCUAGUGGUUAGGAGUUGG	28	16	32089.8	120.784	19990.6	195.211	experimental
854	he_41514	UCCCUGUAUUCGAAAGUGAUCGUGGGCUG	28	17	128.231	6.88029	50.1481	4.64399	experimental
855	he_9775	GACCUCGUGGCGCAAUGGUAGCGCGUCUG	28	18	4833.01	137.055	4870.87	206.351	experimental
856	he_31201	UCUCAGGAGUAAAGACAGAGUU	28	19	106.713	6.65723	36.5556	3.30203	experimental
857	he_1586	GGUUGGUGGUUCGAUCCCACCCAGGGACG	28	20	17094.5	126.653	9893.12	195.131	experimental
858	rt_chr16_B_7	AUGGUCUGGGGGACACUCAUUCUUUAUUUAUC	28	21	103.231	7.85691	30.7593	1.66251	experimental
859	xbz_28039	GAUGAUAGUGGUGUUCAUGU	28	22	109.213	8.44559	32.9352	3.17782	experimental
860	he_17443	ACCUUCUUGUAUAAGCACUG	28	23	104.12	5.08382	31.6944	2.30991	experimental
861	xbz_9572	CACGCUCAUGCACACACCCACA	28	24	566.787	23.9333	543.824	28.8748	experimental
862	he_30220	UUGGGGAAACGGCCGCUGAGUGA	28	25	149.12	9.20455	53.1944	6.01005	experimental
863	xbz_15625	ACCCUGUGGUCUAGUGGUUAGGAGUUGG	28	26	37780.2	170.145	22193.5	353.776	experimental
864	he_41514	UCCCUGUAUUCGAAAGUGAUCGUGGGCUG	28	27	148.278	6.31987	49.7963	4.79244	experimental
865	he_9775	GACCUCGUGGCGCAAUGGUAGCGCGUCUG	28	28	5559.84	65.2956	5498.37	148.89	experimental
866	he_31201	UCUCAGGAGUAAAGACAGAGUU	28	29	134.639	4.56615	35	2.02784	experimental
867	he_1586	GGUUGGUGGUUCGAUCCCACCCAGGGACG	28	30	21347.7	101.485	12041.6	125.652	experimental
868	TU589	AUGACCUAGUAGAGCUCACCAGAUCUGGCCCC	28	31	147.315	5.00028	33.9722	2.36192	experimental
869	TU56	UUCUUUGUUCCUUCUCCACUCCCACUAGCGUG	29	1	20977.9	279.851	11451.9	281.415	experimental
870	xbz_29174	AGCUACAUCUGGCUACUGGGUCU	29	2	1612.91	50.8675	4964.24	129.238	experimental
871	he_4179	UGAGGUAGUAGUUACAGUU	29	3	119.204	6.11687	35.6019	3.54396	experimental
872	xbz_3741	UAUUGCACUUGUCCCGGCCUGUU	29	4	4056.73	59.7211	9664.94	131.648	experimental
873	he_30086	UGCUGGAUCAGUGGUUCGAGUC	29	5	149.509	10.743	49.1296	5.97673	experimental
874	xbz_15847	GCGUUGGUGGUAUAGUGGUGAGGAUAGCUG	29	6	36832.3	541.551	24086.7	237.927	experimental
875	he_41519	CACCUGUAUUCGAAAGUGAUCGUGGGCUG	29	7	143.546	6.45094	50.8426	3.45373	experimental
876	he_9776	AAGGUUGCGUGUUCAAGUCACGUCGGG	29	8	2060.64	36.7226	1965.8	57.4953	experimental
877	he_41925	GCUACAUGAUGUGAUUAUUCUGAGAAC	29	9	112.769	5.79495	33.8889	2.51475	experimental
878	he_16289	AGCGAUGAUGAGAUAGCCAGGCUGAAG	29	10	115.296	7.37292	36.8889	3.06421	experimental
879	TU56	UUCUUUGUUCCUUCUCCACUCCCACUAGCGUG	29	11	18242.5	149.152	10006.7	191.154	experimental
880	xbz_29174	AGCUACAUCUGGCUACUGGGUCU	29	12	1474.56	34.7147	5013.06	163.468	experimental
881	he_4179	UGAGGUAGUAGUUACAGUU	29	13	108.019	5.15186	37.1111	2.29723	experimental
882	xbz_3741	UAUUGCACUUGUCCCGGCCUGUU	29	14	3389.91	59.7313	9785.88	140.147	experimental
883	he_30086	UGCUGGAUCAGUGGUUCGAGUC	29	15	130.13	7.8753	57.75	6.25192	experimental
884	xbz_15847	GCGUUGGUGGUAUAGUGGUGAGGAUAGCUG	29	16	33408.3	168.63	24519.9	349.835	experimental
885	he_41519	CACCUGUAUUCGAAAGUGAUCGUGGGCUG	29	17	130.657	6.55696	54.1852	6.7908	experimental
886	he_9776	AAGGUUGCGUGUUCAAGUCACGUCGGG	29	18	2122.61	55.9891	1960.44	58.1745	experimental
887	he_41925	GCUACAUGAUGUGAUUAUUCUGAGAAC	29	19	101.019	7.42688	32.8056	1.30031	experimental
888	he_16289	AGCGAUGAUGAGAUAGCCAGGCUGAAG	29	20	112.093	8.32689	36.8519	3.08392	experimental
889	rt_chr3_E_1	AAAGACCUGGCUUGUAAUUCUUUUAACCCCUG	29	21	104.176	6.30803	32.0463	2.32574	experimental
890	xbz_29174	AGCUACAUCUGGCUACUGGGUCU	29	22	1540.61	59.7776	4696.54	94.7567	experimental
891	he_4179	UGAGGUAGUAGUUACAGUU	29	23	112.815	3.63819	34.0185	1.93338	experimental
892	xbz_3741	UAUUGCACUUGUCCCGGCCUGUU	29	24	3795.31	77.7384	9602.75	122.766	experimental
893	he_30086	UGCUGGAUCAGUGGUUCGAGUC	29	25	146.065	12.7794	51.7222	6.67095	experimental
894	xbz_15847	GCGUUGGUGGUAUAGUGGUGAGGAUAGCUG	29	26	38816.5	305.826	26665	422.612	experimental
895	he_41519	CACCUGUAUUCGAAAGUGAUCGUGGGCUG	29	27	143.926	5.54961	48.9167	5.01237	experimental
896	he_9776	AAGGUUGCGUGUUCAAGUCACGUCGGG	29	28	2392.51	59.2163	2214.33	79.8889	experimental
897	he_41925	GCUACAUGAUGUGAUUAUUCUGAGAAC	29	29	127.5	4.47318	34.0741	1.89295	experimental
898	he_16289	AGCGAUGAUGAGAUAGCCAGGCUGAAG	29	30	134.62	5.60827	36.0926	2.38585	experimental
899	TU56	UUCUUUGUUCCUUCUCCACUCCCACUAGCGUG	29	31	22840.6	173.829	10694.9	162.265	experimental
900	TU600	UAAAUAGUAUGGCUUUGAAGAAGGCGUGGGUA	30	1	843.704	45.0962	272.5	24.3635	experimental
901	xbz_25884	UUAUAAAGCAAUGAGACUGAUU	30	2	121.417	8.77776	33.5556	2.92374	experimental
902	he_138	GGCUUGGUCUAGGGGUGUCAU	30	3	132.324	6.96698	52.6111	9.39958	experimental
903	xbz_250	UGUAAACAUCCUUGACUGGAAGCU	30	4	241.343	11.8678	528.472	44.5076	experimental
904	he_33220	GAGGAGCCAAUGGGGCGAAGCU	30	5	1815.06	47.2696	4984.44	74.3924	experimental
905	xbz_17038	GGGGGUGUAGCUCAGUGGUAGAGCGG	30	6	29239.3	467.883	24733.3	229.764	experimental
906	he_42309	UUCAGUGAUGAGGCCUGGAAUGUGCGCUG	30	7	140.509	8.96253	52.1667	4.38881	experimental
907	he_9882	CUCCCACUGCUAAAUUUGACUGGCUUU	30	8	23569.6	133.919	9897.48	138.44	experimental
908	he_29755	AUUGUGUUUAACAACAGAG	30	9	118.463	4.71709	35.4259	2.43112	experimental
909	he_9637	CCCGGCCAAUGCACGAGUACAGUUUU	30	10	203.815	13.3872	141.315	17.4477	experimental
910	TU600	UAAAUAGUAUGGCUUUGAAGAAGGCGUGGGUA	30	11	745.472	23.8999	308.259	30.5863	experimental
911	xbz_25884	UUAUAAAGCAAUGAGACUGAUU	30	12	106.444	6.52004	36.4444	3.99142	experimental
912	he_138	GGCUUGGUCUAGGGGUGUCAU	30	13	128.685	9.74118	61.0926	7.96199	experimental
913	xbz_250	UGUAAACAUCCUUGACUGGAAGCU	30	14	223.491	19.524	553.833	38.2375	experimental
914	he_33220	GAGGAGCCAAUGGGGCGAAGCU	30	15	1554.71	38.832	5246.89	136.309	experimental
915	xbz_17038	GGGGGUGUAGCUCAGUGGUAGAGCGG	30	16	26749.4	291.928	24761.1	155.836	experimental
916	he_42309	UUCAGUGAUGAGGCCUGGAAUGUGCGCUG	30	17	130.583	10.2939	52.963	6.6148	experimental
917	he_9882	CUCCCACUGCUAAAUUUGACUGGCUUU	30	18	23254	205.929	9736.26	163.332	experimental
918	he_29755	AUUGUGUUUAACAACAGAG	30	19	106.083	7.36134	33.6296	1.29407	experimental
919	he_9637	CCCGGCCAAUGCACGAGUACAGUUUU	30	20	191.75	13.5047	130.074	16.0977	experimental
920	chr11_A_7	GCUCUGCCCCACUUUCCUCACUCCAGGACUCA	30	21	113.065	5.74257	32.787	1.99087	experimental
921	xbz_25884	UUAUAAAGCAAUGAGACUGAUU	30	22	113.63	11.7669	33.4907	3.53486	experimental
922	he_138	GGCUUGGUCUAGGGGUGUCAU	30	23	124.602	6.3348	59.4074	7.54678	experimental
923	xbz_250	UGUAAACAUCCUUGACUGGAAGCU	30	24	238.583	12.1133	531.741	41.036	experimental
924	he_33220	GAGGAGCCAAUGGGGCGAAGCU	30	25	1845.42	72.2505	5218.65	113.058	experimental
925	xbz_17038	GGGGGUGUAGCUCAGUGGUAGAGCGG	30	26	31385.6	213.343	27564	457.852	experimental
926	he_42309	UUCAGUGAUGAGGCCUGGAAUGUGCGCUG	30	27	143.944	9.50144	49.3148	4.66774	experimental
927	he_9882	CUCCCACUGCUAAAUUUGACUGGCUUU	30	28	27262.8	201.124	11248.8	184.366	experimental
928	he_29755	AUUGUGUUUAACAACAGAG	30	29	132.083	7.90377	34.75	2.47653	experimental
929	he_9637	CCCGGCCAAUGCACGAGUACAGUUUU	30	30	239.88	9.60697	146.667	12.8616	experimental
930	TU600	UAAAUAGUAUGGCUUUGAAGAAGGCGUGGGUA	30	31	954.574	65.9177	335.287	21.0185	experimental
931	TU605	CCAACUUGUAUUUCUUAAACACCAUUUAGGGG	31	1	114.861	7.5745	32	1.65761	experimental
932	xbz_29013	CUUUGGGUGCUAAUGGUGGAGUUA	31	2	28582.3	379.045	29716.4	663.86	experimental
933	he_7788	AAACAUAUUUGAGACUCUUCUUA	31	3	117.269	4.34194	35.0926	3.08004	experimental
934	xbz_13762	AGAGCUUAGCUGAUUGGUGAACA	31	4	240.398	17.4634	59.1667	7.06776	experimental
935	he_26755	UGGCAGUGUCUUAGCUGGUUGU	31	5	151.435	9.30307	87.1852	13.1931	experimental
936	xbz_21862	CCGUGGUGGUAUAGUGGUGAGCAUAGCUG	31	6	37181.6	423.886	24480.9	236.908	experimental
937	he_42311	GUUCGUUGAUGAGGCUCAGAGUGAGCGCUG	31	7	145.657	7.77987	192.278	23.2611	experimental
938	he_10021	CUGCCAUGAUGCUAGACUCCUGAGCAGA	31	8	130.537	6.73591	41.6481	4.42448	experimental
939	he_27797	AAAUAGGGUUGAUGACAUUU	31	9	117.565	5.66721	48.6204	2.71279	experimental
940	he_10229	CAGGUCCCAUGGUGUAAUGGUUAGCACU	31	10	13067.3	142.804	10797.2	187.62	experimental
941	TU605	CCAACUUGUAUUUCUUAAACACCAUUUAGGGG	31	11	106.991	8.37497	35.3981	1.99035	experimental
942	xbz_29013	CUUUGGGUGCUAAUGGUGGAGUUA	31	12	25277.1	431.839	26618.7	353.979	experimental
943	he_7788	AAACAUAUUUGAGACUCUUCUUA	31	13	106.37	3.88525	35.3796	1.72241	experimental
944	xbz_13762	AGAGCUUAGCUGAUUGGUGAACA	31	14	231.722	22.9016	69.8056	7.35414	experimental
945	he_26755	UGGCAGUGUCUUAGCUGGUUGU	31	15	140.176	7.38378	88.5648	7.50237	experimental
946	xbz_21862	CCGUGGUGGUAUAGUGGUGAGCAUAGCUG	31	16	33657.7	287.747	25135.9	296.789	experimental
947	he_42311	GUUCGUUGAUGAGGCUCAGAGUGAGCGCUG	31	17	141.611	8.44978	194.5	16.6669	experimental
948	he_10021	CUGCCAUGAUGCUAGACUCCUGAGCAGA	31	18	124.991	7.647	43.8241	3.93363	experimental
949	he_27797	AAAUAGGGUUGAUGACAUUU	31	19	108.083	6.85787	47.9074	4.67152	experimental
950	he_10229	CAGGUCCCAUGGUGUAAUGGUUAGCACU	31	20	13023.5	265.692	10771.8	324.964	experimental
951	chr9_B_6	AAUAUACUUGUAUUUAUUUACUAUUACCACAG	31	21	103.5	4.82885	33.75	2.51026	experimental
952	xbz_29013	CUUUGGGUGCUAAUGGUGGAGUUA	31	22	26216.2	406.803	25831.4	221.664	experimental
953	he_7788	AAACAUAUUUGAGACUCUUCUUA	31	23	105.296	6.88254	34.6944	2.58847	experimental
954	xbz_13762	AGAGCUUAGCUGAUUGGUGAACA	31	24	237.287	8.86139	63.2315	7.08771	experimental
955	he_26755	UGGCAGUGUCUUAGCUGGUUGU	31	25	161.343	18.5075	88.6667	12.6291	experimental
956	xbz_21862	CCGUGGUGGUAUAGUGGUGAGCAUAGCUG	31	26	39347.9	234.559	27003.2	358.857	experimental
957	he_42311	GUUCGUUGAUGAGGCUCAGAGUGAGCGCUG	31	27	154.787	15.3368	178.472	9.74196	experimental
958	he_10021	CUGCCAUGAUGCUAGACUCCUGAGCAGA	31	28	149.676	5.04156	42.5556	3.47577	experimental
959	he_27797	AAAUAGGGUUGAUGACAUUU	31	29	136.241	7.22776	54.6111	6.79724	experimental
960	he_10229	CAGGUCCCAUGGUGUAAUGGUUAGCACU	31	30	16362.9	215.83	12866.2	314.27	experimental
961	TU605	CCAACUUGUAUUUCUUAAACACCAUUUAGGGG	31	31	129.611	8.36083	32.1019	1.61731	experimental
962	TU625	AUAUCUUAAACUGUAAGAUCCUGUUUCUUCAC	32	1	116.574	5.09573	30.3056	1.53134	experimental
963	xbz_19125	UGCAUAGAGCAAGAGCCUUCU	32	2	121.574	5.7587	34.7778	2.2768	experimental
964	he_597	UCUCAGUGAUGAAAACUUUGUC	32	3	116.991	4.39519	32.1944	2.02073	experimental
965	xbz_8207	CAGUGCAAUGAUGAAAGGGCAU	32	4	196.991	9.89335	225.935	20.1537	experimental
966	he_31933	AUAAUAUUGCUGAAUAAAUUGUA	32	5	120.778	6.9165	35.3611	2.63853	experimental
967	xbz_23915	GGGGGUGUAGCUCAGUGGUAGAGCAU	32	6	28589.7	526.833	24407.4	265.328	experimental
968	he_43348	GGCUUCAUAGCUCAGGGGUUAGAGCACUG	32	7	21184.3	186.489	19598.4	246.901	experimental
969	he_10106	AAGGAUGAUGAGACAGGCUAUGCUGAAG	32	8	127.306	7.49761	44.9074	4.0199	experimental
970	he_45339	AAUUAAAAUAUGGCAUUGUAUAACA	32	9	109.38	4.13718	34.4907	1.58554	experimental
971	he_20939	GUUUCCGUAGUGUAGUGGUUGUCACGUUU	32	10	9706.25	108.234	14681.1	181.625	experimental
972	TU625	AUAUCUUAAACUGUAAGAUCCUGUUUCUUCAC	32	11	108.231	4.83679	33.4537	2.26878	experimental
973	xbz_19125	UGCAUAGAGCAAGAGCCUUCU	32	12	118.25	6.26386	38.1296	2.93255	experimental
974	he_597	UCUCAGUGAUGAAAACUUUGUC	32	13	106.981	5.0548	35.1759	2.13921	experimental
975	xbz_8207	CAGUGCAAUGAUGAAAGGGCAU	32	14	181.454	12.3858	237.454	20.3205	experimental
976	he_31933	AUAAUAUUGCUGAAUAAAUUGUA	32	15	108.157	7.52834	33.287	2.35237	experimental
977	xbz_23915	GGGGGUGUAGCUCAGUGGUAGAGCAU	32	16	25840.4	167.045	24708.3	258.897	experimental
978	he_43348	GGCUUCAUAGCUCAGGGGUUAGAGCACUG	32	17	19952	154.845	20053.1	190.727	experimental
979	he_10106	AAGGAUGAUGAGACAGGCUAUGCUGAAG	32	18	123.324	8.67032	44.1852	5.01986	experimental
980	he_45339	AAUUAAAAUAUGGCAUUGUAUAACA	32	19	103.565	4.81678	34.287	3.22968	experimental
981	he_20939	GUUUCCGUAGUGUAGUGGUUGUCACGUUU	32	20	9572.8	138.041	14372.5	252.431	experimental
982	chr13_D_6	UGGCCACAUUUCUCCUGGUAUAAGUCACUUGC	32	21	108.111	6.93539	32.3241	2.52401	experimental
983	xbz_19125	UGCAUAGAGCAAGAGCCUUCU	32	22	112.87	5.52326	34.6667	3.42066	experimental
984	he_597	UCUCAGUGAUGAAAACUUUGUC	32	23	105.981	4.12193	32.1204	1.65602	experimental
985	xbz_8207	CAGUGCAAUGAUGAAAGGGCAU	32	24	197.426	10.19	230.519	25.8126	experimental
986	he_31933	AUAAUAUUGCUGAAUAAAUUGUA	32	25	117.306	5.16722	34.1111	2.33756	experimental
987	xbz_23915	GGGGGUGUAGCUCAGUGGUAGAGCAU	32	26	30520.5	195.961	26782.9	363.126	experimental
988	he_43348	GGCUUCAUAGCUCAGGGGUUAGAGCACUG	32	27	23385.5	198.6	21578.8	333.635	experimental
989	he_10106	AAGGAUGAUGAGACAGGCUAUGCUGAAG	32	28	145.907	4.97383	45.9815	3.49628	experimental
990	he_45339	AAUUAAAAUAUGGCAUUGUAUAACA	32	29	127.611	5.08954	35.2778	2.83777	experimental
991	he_20939	GUUUCCGUAGUGUAGUGGUUGUCACGUUU	32	30	11828.3	124.561	17027.1	213.515	experimental
992	TU625	AUAUCUUAAACUGUAAGAUCCUGUUUCUUCAC	32	31	125.389	8.25056	31.3704	1.19651	experimental
993	TU655	GCAAGAAGUGCAAAAGUUUAUGUGGUUAGGCU	33	1	115.704	5.9723	31.3056	1.55557	experimental
994	xbz_16233	GCUUAUCAGACUGAUGCUGAAA	33	2	9216.21	174.937	27418.8	433.855	experimental
995	he_4830	UCAAGUGAAAAUGGCAGAACUUCA	33	3	1552.44	193.409	1370.44	107.387	experimental
996	xbz_9265	GUUUCCCAGCCAACGCACCA	33	4	2087.38	69.7646	2243.78	108.762	experimental
997	he_28825	UAGCACCAUUUGAAAUCGGUUA	33	5	163.278	9.33973	361.556	46.3492	experimental
998	xbz_25897	GUUUCCGUAGUGUAGUGGUCAUCACGUUC	33	6	14142.8	250.862	22795.1	239.873	experimental
999	he_43686	GGGGGUGUAGCUCAGUGGUAGAGCAU	33	7	27998.8	421.854	24424.2	361.178	experimental
1000	he_10527	GACCGCGUGGCCUAAUGGAUAAGGCGUCUG	33	8	23362.5	272.178	20429.6	220.846	experimental
1001	he_35105	AGAGGUAGUAGGUAUAGUG	33	9	116.611	6.16719	40.3426	3.63822	experimental
1002	he_23994	UUUUUCUCCAGCUCCCGAUGACUUAUGGCA	33	10	116.398	6.37598	36.0741	2.27421	experimental
1003	TU655	GCAAGAAGUGCAAAAGUUUAUGUGGUUAGGCU	33	11	108.5	4.4961	34	1.38753	experimental
1004	xbz_16233	GCUUAUCAGACUGAUGCUGAAA	33	12	8151.69	137.698	26677	157.757	experimental
1005	he_4830	UCAAGUGAAAAUGGCAGAACUUCA	33	13	1561.31	178.863	1608.69	152.945	experimental
1006	xbz_9265	GUUUCCCAGCCAACGCACCA	33	14	1857.81	53.9578	2421.4	41.1107	experimental
1007	he_28825	UAGCACCAUUUGAAAUCGGUUA	33	15	154.639	7.58929	414.231	31.4906	experimental
1008	xbz_25897	GUUUCCGUAGUGUAGUGGUCAUCACGUUC	33	16	12817	138.187	23398.1	231.081	experimental
1009	he_43686	GGGGGUGUAGCUCAGUGGUAGAGCAU	33	17	26198.3	249.609	24709.2	382.159	experimental
1010	he_10527	GACCGCGUGGCCUAAUGGAUAAGGCGUCUG	33	18	23104.4	293.35	19972.3	229.5	experimental
1011	he_35105	AGAGGUAGUAGGUAUAGUG	33	19	108.648	8.5722	40.3519	4.56176	experimental
1012	he_23994	UUUUUCUCCAGCUCCCGAUGACUUAUGGCA	33	20	110.574	8.86156	34.3611	2.79003	experimental
1013	rt_chr2_D_2	AGGAUUGCAGUCACUGCAUGAAGUUAGUCACC	33	21	107.38	6.91297	33.6481	2.898	experimental
1014	xbz_16233	GCUUAUCAGACUGAUGCUGAAA	33	22	8380.06	206.583	24961.4	261.085	experimental
1015	he_4830	UCAAGUGAAAAUGGCAGAACUUCA	33	23	1702.89	198.383	1675.23	267.232	experimental
1016	xbz_9265	GUUUCCCAGCCAACGCACCA	33	24	2001.65	61.7467	2327.67	86.2916	experimental
1017	he_28825	UAGCACCAUUUGAAAUCGGUUA	33	25	166.222	12.5916	413.519	34.6142	experimental
1018	xbz_25897	GUUUCCGUAGUGUAGUGGUCAUCACGUUC	33	26	15011.4	122.31	24433.4	325.355	experimental
1019	he_43686	GGGGGUGUAGCUCAGUGGUAGAGCAU	33	27	30554.9	157.722	28034.3	566.065	experimental
1020	he_10527	GACCGCGUGGCCUAAUGGAUAAGGCGUCUG	33	28	27177.4	239.877	23327.4	409.767	experimental
1021	he_35105	AGAGGUAGUAGGUAUAGUG	33	29	132.769	4.4018	39.8889	4.10227	experimental
1022	he_23994	UUUUUCUCCAGCUCCCGAUGACUUAUGGCA	33	30	138.435	8.04807	35.2685	2.19858	experimental
1023	TU655	GCAAGAAGUGCAAAAGUUUAUGUGGUUAGGCU	33	31	132.815	6.86199	31.5926	1.90933	experimental
1024	TU668	CUCAUUUUACCUUGAUUAGUGACUCAACUCAU	34	1	121.861	6.09498	31.6389	1.72642	experimental
1025	xbz_13765	UGGCUCAGUUCAGCAGGAACAGGA	34	2	1538.5	38.7538	4636.53	159.052	experimental
1026	he_20459	GACAAUGAUGAGAAGACCUGAGG	34	3	112.639	5.34153	34.9259	2.65	experimental
1027	xbz_11501	GAGUUCUUCCUACGAUC	34	4	112.731	6.73616	33.4815	2.6703	experimental
1028	he_32394	UUCAAGUAAUCCAGGAUAGGCUGUU	34	5	3349.48	50.5219	10405.5	178.032	experimental
1029	xbz_26076	GCUUCUGUAGUGUAGUGGUUAUCACGUUC	34	6	11685.5	238.457	16092.6	120.939	experimental
1030	he_43853	GGUUCCAUAGUGUAAUGGUGAGCACUCUGA	34	7	22222.9	272.317	27160.6	190.833	experimental
1031	he_10552	UUUCUGUGUGGAAUUUGAAUAUCUGAAA	34	8	110.611	6.67515	122.602	16.8134	experimental
1032	he_36506	UAGCAGCACAGAAAUAUUGGCA	34	9	138.556	11.8829	89.0278	9.40914	experimental
1033	he_17916	AACUGACUUUAAGCAAAAUGACACGU	34	10	113.778	7.26319	33.8704	2.05573	experimental
1034	TU668	CUCAUUUUACCUUGAUUAGUGACUCAACUCAU	34	11	108.296	5.84577	33.5833	2.13614	experimental
1035	xbz_13765	UGGCUCAGUUCAGCAGGAACAGGA	34	12	1363.12	37.7131	4849.52	81.1064	experimental
1036	he_20459	GACAAUGAUGAGAAGACCUGAGG	34	13	112.269	5.72844	37.8796	2.41768	experimental
1037	xbz_11501	GAGUUCUUCCUACGAUC	34	14	100.722	5.14252	36.8241	2.83116	experimental
1038	he_32394	UUCAAGUAAUCCAGGAUAGGCUGUU	34	15	3026.32	53.8861	10755.5	145.616	experimental
1039	xbz_26076	GCUUCUGUAGUGUAGUGGUUAUCACGUUC	34	16	10662.3	129.556	16712.7	267.085	experimental
1040	he_43853	GGUUCCAUAGUGUAAUGGUGAGCACUCUGA	34	17	20770.8	199.778	27329.9	207.183	experimental
1041	he_10552	UUUCUGUGUGGAAUUUGAAUAUCUGAAA	34	18	110.093	6.3283	120.926	16.3288	experimental
1042	he_36506	UAGCAGCACAGAAAUAUUGGCA	34	19	124.63	9.71904	74.4074	8.53803	experimental
1043	he_17916	AACUGACUUUAAGCAAAAUGACACGU	34	20	102.981	4.93506	31.1019	1.49103	experimental
1044	rt_chr1_G_1	UUUUAUUAUGUAUAAAAAUUUGAUUAUAAAUC	34	21	104.565	4.73853	31.4259	3.0239	experimental
1045	xbz_13765	UGGCUCAGUUCAGCAGGAACAGGA	34	22	1408.18	38.4676	4539.94	114.298	experimental
1046	he_20459	GACAAUGAUGAGAAGACCUGAGG	34	23	116.963	3.83278	37.0741	3.25463	experimental
1047	xbz_11501	GAGUUCUUCCUACGAUC	34	24	111.065	3.29052	34.3704	1.80131	experimental
1048	he_32394	UUCAAGUAAUCCAGGAUAGGCUGUU	34	25	3434.16	64.9162	10379.7	172.763	experimental
1049	xbz_26076	GCUUCUGUAGUGUAGUGGUUAUCACGUUC	34	26	12576.7	121.627	16939.7	194.985	experimental
1050	he_43853	GGUUCCAUAGUGUAAUGGUGAGCACUCUGA	34	27	24587.8	200.414	29983	427.525	experimental
1051	he_10552	UUUCUGUGUGGAAUUUGAAUAUCUGAAA	34	28	128.454	7.52241	132.111	10.1727	experimental
1052	he_36506	UAGCAGCACAGAAAUAUUGGCA	34	29	149.148	6.94681	93.1944	10.3783	experimental
1053	he_17916	AACUGACUUUAAGCAAAAUGACACGU	34	30	128.093	3.43031	32.6481	1.38291	experimental
1054	TU668	CUCAUUUUACCUUGAUUAGUGACUCAACUCAU	34	31	129.583	8.41797	34.0556	2.3713	experimental
1055	TU675	GCCUCUUUGAGGUUGGAAUAUCUGCACCCCUG	35	1	117.426	5.32356	31.213	1.72963	experimental
1056	xbz_10531	AACGUGACCGAUCCCGGA	35	2	121.269	5.85112	35.1574	2.45392	experimental
1057	he_25933	UAUUGCUUGUCCAGGCCUAU	35	3	112.843	7.3232	32.9444	3.08094	experimental
1058	xbz_1805	AGACACGUUGCGUAUUG	35	4	112.815	4.63055	33.3889	2.7235	experimental
1059	he_53229	CUUAGCAGGUUGUAUUAUCAUU	35	5	120.556	4.40546	35.3611	1.83659	experimental
1060	xbz_26118	GGGGGUGUAGCUCAGUGGUAGAGCGU	35	6	29411.2	552.255	25132.7	191.6	experimental
1061	he_44379	UCCUAUUUGUAUAGUGCUGAGUAUCCCC	35	7	15088.2	451.162	6757.99	263.377	experimental
1062	he_11413	UCUCAUGAUGAACACAUAUGCCUCUGAGC	35	8	123.176	8.61734	153.111	15.9276	experimental
1063	he_38587	GGGAAGGUGGCUCGGGGGGUC	35	9	6900.69	83.5853	13376.2	234.334	experimental
1064	he_22798	CCUGAUGAUGAAUCUGGAGAUGCUGAUG	35	10	108.065	4.31098	34.6481	2.79624	experimental
1065	TU675	GCCUCUUUGAGGUUGGAAUAUCUGCACCCCUG	35	11	109.593	3.76664	33.1481	2.09501	experimental
1066	xbz_10531	AACGUGACCGAUCCCGGA	35	12	114.611	5.88493	39.4352	4.55142	experimental
1067	he_25933	UAUUGCUUGUCCAGGCCUAU	35	13	106.241	5.33174	34.0741	1.83274	experimental
1068	xbz_1805	AGACACGUUGCGUAUUG	35	14	100.222	8.07365	34.2407	2.37144	experimental
1069	he_53229	CUUAGCAGGUUGUAUUAUCAUU	35	15	107.185	5.94704	36.25	2.28823	experimental
1070	xbz_26118	GGGGGUGUAGCUCAGUGGUAGAGCGU	35	16	26633.3	276.951	25547.5	260.533	experimental
1071	he_44379	UCCUAUUUGUAUAGUGCUGAGUAUCCCC	35	17	12881.8	344.616	5012.57	327.175	experimental
1072	he_11413	UCUCAUGAUGAACACAUAUGCCUCUGAGC	35	18	113.065	5.29375	133.333	12.8848	experimental
1073	he_38587	GGGAAGGUGGCUCGGGGGGUC	35	19	6725.73	95.7897	13128.5	257.411	experimental
1074	he_22798	CCUGAUGAUGAAUCUGGAGAUGCUGAUG	35	20	106.444	4.55975	32.7593	2.21663	experimental
1075	rt_chr4_A_3	UUGUCUUACUUUCCUCACAUAAGGAGUUAUUU	35	21	102.444	4.83433	30.4259	2.09674	experimental
1076	xbz_10531	AACGUGACCGAUCCCGGA	35	22	113.13	9.22217	37.6389	4.49186	experimental
1077	he_25933	UAUUGCUUGUCCAGGCCUAU	35	23	107.167	5.10909	33.2407	2.3317	experimental
1078	xbz_1805	AGACACGUUGCGUAUUG	35	24	106.491	4.30929	33.2963	2.04738	experimental
1079	he_53229	CUUAGCAGGUUGUAUUAUCAUU	35	25	118.12	4.97605	33.8981	2.83812	experimental
1080	xbz_26118	GGGGGUGUAGCUCAGUGGUAGAGCGU	35	26	31293.1	166.213	27762.9	426.492	experimental
1081	he_44379	UCCUAUUUGUAUAGUGCUGAGUAUCCCC	35	27	15037.2	294.86	5335.59	268.882	experimental
1082	he_11413	UCUCAUGAUGAACACAUAUGCCUCUGAGC	35	28	140.75	8.13912	158.472	11.2229	experimental
1083	he_38587	GGGAAGGUGGCUCGGGGGGUC	35	29	8204.44	171.58	15620.6	242.84	experimental
1084	he_22798	CCUGAUGAUGAAUCUGGAGAUGCUGAUG	35	30	130.583	4.11999	34.0463	2.23976	experimental
1085	TU675	GCCUCUUUGAGGUUGGAAUAUCUGCACCCCUG	35	31	133.25	7.00617	31.963	1.85918	experimental
1086	BKG0		36	1	115.704	6.70648	29.4907	1.88697	control	control_empty	LC Internal Use
1087	xbz_3163	UGAGGUAGUUGUUGUCUAGUU	36	2	114.509	5.84295	31.2037	1.40599	experimental
1088	he_9059	CAUUCGUGAUGGGGAUGGGGG	36	3	812.667	41.3869	589.213	57.61	experimental
1089	xbz_3738	ACUGCAUUAUGAGCACUUAAAGU	36	4	114.157	8.24753	32.6111	1.69018	experimental
1090	he_27875	CAGAGCCGCCGCAGGUGCAGAU	36	5	526.787	29.2268	1096.94	60.2816	experimental
1091	xbz_26123	GGGGGUAUAGCUCAGUGGUAGAGCGCG	36	6	27784.7	476.376	23111.6	213.15	experimental
1092	he_44769	AAAUUAGAAAUUUAACAAAAAGAUAGAU	36	7	126.944	6.26343	38.0926	3.2282	experimental
1093	he_11415	GCGGCUGAUGACAGCACUUCUGCUGAGA	36	8	118.611	6.20647	151.907	13.3175	experimental
1094	he_28251	GAGCAUGGUAAUGGAUUUAUG	36	9	112.963	5.21845	34.3611	1.88183	experimental
1095	he_15588	CUUCCCACUGCUAAAUUUAACUGGCA	36	10	20537	83.8356	8216.11	112.652	experimental
1096	BKG0		36	11	107.769	5.07993	34.7315	2.00749	control	control_empty	LC Internal Use
1097	xbz_3163	UGAGGUAGUUGUUGUCUAGUU	36	12	107.157	5.84562	33.2963	2.31315	experimental
1098	he_9059	CAUUCGUGAUGGGGAUGGGGG	36	13	753.222	26.1124	640.435	46.624	experimental
1099	xbz_3738	ACUGCAUUAUGAGCACUUAAAGU	36	14	98.6204	4.28149	33.1111	1.79997	experimental
1100	he_27875	CAGAGCCGCCGCAGGUGCAGAU	36	15	449.667	24.4231	1168.59	55.4489	experimental
1101	xbz_26123	GGGGGUAUAGCUCAGUGGUAGAGCGCG	36	16	24951.2	329.425	23578.2	359.092	experimental
1102	he_44769	AAAUUAGAAAUUUAACAAAAAGAUAGAU	36	17	122.5	8.56803	39.2222	3.49722	experimental
1103	he_11415	GCGGCUGAUGACAGCACUUCUGCUGAGA	36	18	111.009	6.15606	171.75	14.1943	experimental
1104	he_28251	GAGCAUGGUAAUGGAUUUAUG	36	19	104.917	6.59386	34.7407	3.58442	experimental
1105	he_15588	CUUCCCACUGCUAAAUUUAACUGGCA	36	20	20147	140.613	7858.53	70.3555	experimental
1106	BKG0		36	21	97.5463	6.64927	30.8148	2.12747	control	control_empty	LC Internal Use
1107	xbz_3163	UGAGGUAGUUGUUGUCUAGUU	36	22	107.157	6.45497	30.7222	2.21648	experimental
1108	he_9059	CAUUCGUGAUGGGGAUGGGGG	36	23	788.417	32.9931	638.519	64.8807	experimental
1109	xbz_3738	ACUGCAUUAUGAGCACUUAAAGU	36	24	110.676	7.55767	32.8796	1.88807	experimental
1110	he_27875	CAGAGCCGCCGCAGGUGCAGAU	36	25	521.259	23.2344	1119.62	27.8409	experimental
1111	xbz_26123	GGGGGUAUAGCUCAGUGGUAGAGCGCG	36	26	29654.8	206.652	25513	431.317	experimental
1112	he_44769	AAAUUAGAAAUUUAACAAAAAGAUAGAU	36	27	139.722	5.85308	39.1204	5.51416	experimental
1113	he_11415	GCGGCUGAUGACAGCACUUCUGCUGAGA	36	28	136.815	6.62923	170.778	16.8136	experimental
1114	he_28251	GAGCAUGGUAAUGGAUUUAUG	36	29	125.972	8.59304	33.5278	1.83149	experimental
1115	he_15588	CUUCCCACUGCUAAAUUUAACUGGCA	36	30	25252.6	208.227	9137.5	81.8704	experimental
1116	BKG0		36	31	128.463	6.99857	31.4815	1.5972	control	control_empty	LC Internal Use
1117	PUC2PM		37	1	13942	118.222	25256.1	559.501	control	control_spike-calibration	LC Internal Use
1118	xbz_1853	CAAAGUGAUCAAGGUUGACA	37	2	123.185	5.91236	33.0093	1.68276	experimental
1119	he_21132	UCAGGUGUGGAAACUGAGGCAG	37	3	123.398	8.87077	38.1204	2.5894	experimental
1120	xbz_13763	UUCACAGUGGCUAAGUUCU	37	4	1259.1	43.9203	4992.49	146.702	experimental
1121	he_48829	UGAGCGCCUCGACGACAGAGCCG	37	5	133.62	10.8531	44.963	4.3297	experimental
1122	xbz_26125	GGGGGUAUAGCUCAGCGGUAGAGCGCG	37	6	26515.1	1203.46	21943.8	232.096	experimental
1123	he_44968	UUGUUGUGAUUAAUGUAUGUGGAUGAGG	37	7	140.287	8.03038	98.3241	10.4701	experimental
1124	he_11517	CAUCUGUGAUGUGAACCACAACCUGAGU	37	8	119.463	6.76636	38.1019	2.91288	experimental
1125	he_41025	UGAGGUUAGGUUGUAGAGU	37	9	112.593	5.10458	32.1204	1.77057	experimental
1126	he_5849	AACAAAGAGGUUUGUGGUAGACAUGUAAU	37	10	107.676	4.74948	33.1944	1.99278	experimental
1127	PUC2PM		37	11	11889.9	113.93	23520	179.179	control	control_spike-calibration	LC Internal Use
1128	xbz_1853	CAAAGUGAUCAAGGUUGACA	37	12	110.861	6.32523	37.3981	4.18037	experimental
1129	he_21132	UCAGGUGUGGAAACUGAGGCAG	37	13	116.38	6.80945	40.713	2.62999	experimental
1130	xbz_13763	UUCACAGUGGCUAAGUUCU	37	14	1080.83	29.1677	5316.75	117.116	experimental
1131	he_48829	UGAGCGCCUCGACGACAGAGCCG	37	15	122.37	6.87076	43.8241	3.93838	experimental
1132	xbz_26125	GGGGGUAUAGCUCAGCGGUAGAGCGCG	37	16	26232.5	316.159	23177.3	407.912	experimental
1133	he_44968	UUGUUGUGAUUAAUGUAUGUGGAUGAGG	37	17	131.083	4.78925	97.1481	9.05932	experimental
1134	he_11517	CAUCUGUGAUGUGAACCACAACCUGAGU	37	18	117.676	7.94588	39.8519	2.74054	experimental
1135	he_41025	UGAGGUUAGGUUGUAGAGU	37	19	103.972	8.02153	34.0648	2.50709	experimental
1136	he_5849	AACAAAGAGGUUUGUGGUAGACAUGUAAU	37	20	103.62	4.93456	33.463	2.38149	experimental
1137	PUC2PM		37	21	11844.7	131.713	21299.8	297.137	control	control_spike-calibration	LC Internal Use
1138	xbz_1853	CAAAGUGAUCAAGGUUGACA	37	22	111.389	6.90636	33.5926	2.96723	experimental
1139	he_21132	UCAGGUGUGGAAACUGAGGCAG	37	23	120.13	7.28215	41.4815	3.88979	experimental
1140	xbz_13763	UUCACAGUGGCUAAGUUCU	37	24	1184.79	42.7245	4907.85	115.014	experimental
1141	he_48829	UGAGCGCCUCGACGACAGAGCCG	37	25	140.769	5.72844	46.5833	4.1018	experimental
1142	xbz_26125	GGGGGUAUAGCUCAGCGGUAGAGCGCG	37	26	31259	135.543	24654.9	547.276	experimental
1143	he_44968	UUGUUGUGAUUAAUGUAUGUGGAUGAGG	37	27	166.574	17.3723	90.7407	10.9403	experimental
1144	he_11517	CAUCUGUGAUGUGAACCACAACCUGAGU	37	28	132.222	7.43612	39.4815	2.71197	experimental
1145	he_41025	UGAGGUUAGGUUGUAGAGU	37	29	124.111	5.53719	33.8704	2.38411	experimental
1146	he_5849	AACAAAGAGGUUUGUGGUAGACAUGUAAU	37	30	132.38	5.45109	33.3519	1.20214	experimental
1147	PUC2PM		37	31	14963.2	172.399	24924.5	164.991	control	control_spike-calibration	LC Internal Use
1148	PUC2MM		38	1	12598.8	142.594	21784.1	564.98	control	control_spike-calibration	LC Internal Use
1149	xbz_2177	CAGUGCAAUGUUAAAAGGGCAU	38	2	176.648	8.77796	180.111	15.8447	experimental
1150	he_1011	CGGCUCUGGGUCUGUGGGGAGC	38	3	627.509	47.2127	391.852	40.0849	experimental
1151	xbz_13870	UAUGUGCCUUUGGACUACAUCG	38	4	120.296	4.24101	38.1667	2.65633	experimental
1152	he_51418	UCGAGGAGCUCACAGUCUAGUAU	38	5	1526.25	55.7857	2707.19	139.914	experimental
1153	xbz_26127	GGGGGUAUAGCUCAGUGGUAGAGAGUG	38	6	26645	404.726	23175.3	201.635	experimental
1154	he_45766	GGGGGUAUAGCUCAGGGGUAGAGAUUUG	38	7	32731.5	274.73	24117.4	246.46	experimental
1155	he_11751	AACCGAGCGUCCAAGCUCUUUCCAUUU	38	8	130.074	9.52194	37.463	2.85613	experimental
1156	he_51341	CUGGGAGGUGGAUGUUUACUUC	38	9	123.463	4.85572	42.4444	4.21908	experimental
1157	he_3161	AUCAGAAGUCUGGUCACCUGGGGAAA	38	10	115.537	6.26282	37.9815	2.86448	experimental
1158	PUC2MM		38	11	10916.8	120.674	20661.2	254.11	control	control_spike-calibration	LC Internal Use
1159	xbz_2177	CAGUGCAAUGUUAAAAGGGCAU	38	12	157.926	8.0416	212.944	21.6604	experimental
1160	he_1011	CGGCUCUGGGUCUGUGGGGAGC	38	13	601.694	44.521	443.741	47.086	experimental
1161	xbz_13870	UAUGUGCCUUUGGACUACAUCG	38	14	108.602	6.15977	37.9259	2.74357	experimental
1162	he_51418	UCGAGGAGCUCACAGUCUAGUAU	38	15	1359.61	40.5898	2780.62	46.0022	experimental
1163	xbz_26127	GGGGGUAUAGCUCAGUGGUAGAGAGUG	38	16	24221.3	189.13	23668.5	212.293	experimental
1164	he_45766	GGGGGUAUAGCUCAGGGGUAGAGAUUUG	38	17	30554.4	288.128	24355.6	225.793	experimental
1165	he_11751	AACCGAGCGUCCAAGCUCUUUCCAUUU	38	18	125.139	9.23571	38.5278	2.6597	experimental
1166	he_51341	CUGGGAGGUGGAUGUUUACUUC	38	19	114.907	5.67094	39.8519	4.3013	experimental
1167	he_3161	AUCAGAAGUCUGGUCACCUGGGGAAA	38	20	105.148	8.20852	33.9074	1.82678	experimental
1168	PUC2MM		38	21	10887.8	129.622	18507.6	133.415	control	control_spike-calibration	LC Internal Use
1169	xbz_2177	CAGUGCAAUGUUAAAAGGGCAU	38	22	154.111	13.7095	189.889	28.7641	experimental
1170	he_1011	CGGCUCUGGGUCUGUGGGGAGC	38	23	671.88	30.3487	488.88	26.1876	experimental
1171	xbz_13870	UAUGUGCCUUUGGACUACAUCG	38	24	115.38	6.52918	36.5648	3.0518	experimental
1172	he_51418	UCGAGGAGCUCACAGUCUAGUAU	38	25	1536.93	43.0619	2610.71	95.9096	experimental
1173	xbz_26127	GGGGGUAUAGCUCAGUGGUAGAGAGUG	38	26	28380.7	168.876	24913.6	304.755	experimental
1174	he_45766	GGGGGUAUAGCUCAGGGGUAGAGAUUUG	38	27	35997.3	302.99	26856.9	476.706	experimental
1175	he_11751	AACCGAGCGUCCAAGCUCUUUCCAUUU	38	28	146	7.80726	39.0556	3.80072	experimental
1176	he_51341	CUGGGAGGUGGAUGUUUACUUC	38	29	145.389	5.18415	42.0185	4.31035	experimental
1177	he_3161	AUCAGAAGUCUGGUCACCUGGGGAAA	38	30	133.231	6.33284	35.2778	3.01347	experimental
1178	PUC2MM		38	31	13638.6	234.275	21797.3	247.326	control	control_spike-calibration	LC Internal Use
1179	PUC2PM-20B		39	1	15403.8	202.227	31948.9	608.729	control	control_spike-calibration	LC Internal Use
1180	xbz_1041	CAUAACUUGACCUCUCUGACUA	39	2	5023.61	322.05	76.25	10.6184	experimental
1181	he_16755	GGCCAGUUGGUGAAGCAGUU	39	3	4664.49	200.708	807.537	55.1437	experimental
1182	xbz_702	UAUUGCACUCGUCCCGGCCU	39	4	2842.96	60.5138	7160.17	149.996	experimental
1183	he_49594	CAAAGUGCUGUUCGUGCAGGUAG	39	5	287.935	11.5235	553.472	26.2712	experimental
1184	xbz_28951	AGCUCCGAGGUGAUUUUCAUAUUGAA	39	6	3129.69	137.465	322.88	15.6789	experimental
1185	he_45964	AGUGAUGUUGUAAAAAUAAAUGUCUGAA	39	7	123.204	8.07414	43.3519	4.43502	experimental
1186	he_11793	GAUAUAGACAGCAGGACGGUGGCCAUGG	39	8	2638.91	73.9914	2878.94	131.825	experimental
1187	he_31220	UGGAGACGCGGCCCUGUUGGAGU	39	9	116.741	7.99576	38.2315	2.90216	experimental
1188	he_8384	AUGUUCUCUGAGGACCCGCGGCUUCGCA	39	10	105.722	4.46551	34.7685	3.0467	experimental
1189	PUC2PM-20B		39	11	13274.1	111.762	28582.9	200.846	control	control_spike-calibration	LC Internal Use
1190	xbz_1041	CAUAACUUGACCUCUCUGACUA	39	12	4623.08	353.818	84.8796	14.0843	experimental
1191	he_16755	GGCCAGUUGGUGAAGCAGUU	39	13	4165.65	108.563	904.889	40.0631	experimental
1192	xbz_702	UAUUGCACUCGUCCCGGCCU	39	14	2416.9	63.2891	7477.6	154.202	experimental
1193	he_49594	CAAAGUGCUGUUCGUGCAGGUAG	39	15	265.037	27.4825	513.583	34.4625	experimental
1194	xbz_28951	AGCUCCGAGGUGAUUUUCAUAUUGAA	39	16	2721.39	121.795	310	29.6944	experimental
1195	he_45964	AGUGAUGUUGUAAAAAUAAAUGUCUGAA	39	17	105.213	4.54891	40.537	3.41362	experimental
1196	he_11793	GAUAUAGACAGCAGGACGGUGGCCAUGG	39	18	2539.73	107.572	2846.53	98.0951	experimental
1197	he_31220	UGGAGACGCGGCCCUGUUGGAGU	39	19	115.88	6.81082	37.0648	1.61346	experimental
1198	he_8384	AUGUUCUCUGAGGACCCGCGGCUUCGCA	39	20	99.9722	7.55597	33.5	2.12902	experimental
1199	PUC2PM-20B		39	21	13312.1	143.721	26664	231.064	control	control_spike-calibration	LC Internal Use
1200	xbz_1041	CAUAACUUGACCUCUCUGACUA	39	22	5127.19	377.605	70.7407	10.7158	experimental
1201	he_16755	GGCCAGUUGGUGAAGCAGUU	39	23	4487.81	171.748	892.185	74.7193	experimental
1202	xbz_702	UAUUGCACUCGUCCCGGCCU	39	24	2643.68	100.149	6972.22	102.215	experimental
1203	he_49594	CAAAGUGCUGUUCGUGCAGGUAG	39	25	303.296	16.3491	490.852	29.2865	experimental
1204	xbz_28951	AGCUCCGAGGUGAUUUUCAUAUUGAA	39	26	3404.22	125.312	348.046	32.4407	experimental
1205	he_45964	AGUGAUGUUGUAAAAAUAAAUGUCUGAA	39	27	125.481	5.20151	39.8056	2.76648	experimental
1206	he_11793	GAUAUAGACAGCAGGACGGUGGCCAUGG	39	28	2955.88	45.9461	2980.7	88.356	experimental
1207	he_31220	UGGAGACGCGGCCCUGUUGGAGU	39	29	137.046	7.80173	36.9722	3.71775	experimental
1208	he_8384	AUGUUCUCUGAGGACCCGCGGCUUCGCA	39	30	126.88	5.918	34.4352	3.23611	experimental
1209	PUC2PM-20B		39	31	17168.7	154.151	31327.7	141.04	control	control_spike-calibration	LC Internal Use
1210	PUC2MM-20B		40	1	120.426	9.2849	34.3241	3.01035	control	control_spike-calibration	LC Internal Use
1211	xbz_10778	AGAGAUUAUAAAAUUGGAUUU	40	2	109.593	9.04406	31.4352	2.01524	experimental
1212	he_8861	CGGGGUUUUGAGGGCGAGAUGA	40	3	121.13	6.55258	36.0278	3.80471	experimental
1213	xbz_13761	AUCACAUUGCCAGGGAUUA	40	4	5575.58	72.9544	13095.8	154.334	experimental
1214	he_48075	CUUUCAGUCGGAUGUUUGCAGC	40	5	380.259	17.9018	401.509	18.3122	experimental
1215	xbz_998	UCCCUGGUGGUCUAGUGGUUAGGAUUUGG	40	6	38540.5	633.699	22684	335.005	experimental
1216	he_46034	CCCCCACUGUUAAAUUUGACUGGCUU	40	7	21507.2	180.39	8896.27	142.709	experimental
1217	he_12443	GAAAAUGAUGAUCCUUCUCAUCUGAUG	40	8	112.398	5.15542	33.8333	2.59583	experimental
1218	he_37964	CAACAUGAUGACUCUAGUGCCUGAUU	40	9	109.519	6.63252	33.8889	3.06116	experimental
1219	he_3159	CUGAUGAGAAUGUGAAUAGCUUUUAUU	40	10	101.157	4.38809	31.8796	1.994	experimental
1220	PUC2MM-20B		40	11	110.306	7.70054	35.3333	2.23816	control	control_spike-calibration	LC Internal Use
1221	xbz_10778	AGAGAUUAUAAAAUUGGAUUU	40	12	107.37	5.51903	33.4907	1.98826	experimental
1222	he_8861	CGGGGUUUUGAGGGCGAGAUGA	40	13	113.204	5.73359	41.4907	4.6373	experimental
1223	xbz_13761	AUCACAUUGCCAGGGAUUA	40	14	4851.69	125.431	13950	173.322	experimental
1224	he_48075	CUUUCAGUCGGAUGUUUGCAGC	40	15	326.333	23.9735	390.204	36.316	experimental
1225	xbz_998	UCCCUGGUGGUCUAGUGGUUAGGAUUUGG	40	16	34550.6	295.586	23386.4	315.756	experimental
1226	he_46034	CCCCCACUGUUAAAUUUGACUGGCUU	40	17	19507	145.876	8574.04	151.541	experimental
1227	he_12443	GAAAAUGAUGAUCCUUCUCAUCUGAUG	40	18	104.019	6.09118	34.9815	2.19592	experimental
1228	he_37964	CAACAUGAUGACUCUAGUGCCUGAUU	40	19	103.056	7.74456	31.6944	1.211	experimental
1229	he_3159	CUGAUGAGAAUGUGAAUAGCUUUUAUU	40	20	98.4259	7.3207	29.6481	1.68176	experimental
1230	PUC2MM-20B		40	21	107.083	8.98506	34.5741	2.77237	control	control_spike-calibration	LC Internal Use
1231	xbz_10778	AGAGAUUAUAAAAUUGGAUUU	40	22	102.796	5.40467	29.0278	1.58532	experimental
1232	he_8861	CGGGGUUUUGAGGGCGAGAUGA	40	23	122.981	5.55849	40.4444	3.42976	experimental
1233	xbz_13761	AUCACAUUGCCAGGGAUUA	40	24	5318.63	76.8106	12949.9	233.819	experimental
1234	he_48075	CUUUCAGUCGGAUGUUUGCAGC	40	25	370.454	33.7244	374.685	22.7513	experimental
1235	xbz_998	UCCCUGGUGGUCUAGUGGUUAGGAUUUGG	40	26	40716.3	375.292	24183.2	285.631	experimental
1236	he_46034	CCCCCACUGUUAAAUUUGACUGGCUU	40	27	22999.7	182.036	8766.76	142.843	experimental
1237	he_12443	GAAAAUGAUGAUCCUUCUCAUCUGAUG	40	28	125.519	7.10335	33.6574	2.4348	experimental
1238	he_37964	CAACAUGAUGACUCUAGUGCCUGAUU	40	29	122.148	5.30352	31.9074	2.45915	experimental
1239	he_3159	CUGAUGAGAAUGUGAAUAGCUUUUAUU	40	30	122.537	6.20585	31.25	1.31224	experimental
1240	PUC2MM-20B		40	31	136.704	7.01968	36.3519	3.54758	control	control_spike-calibration	LC Internal Use
1241	a2-PUC2PM-20B		41	1	18411.6	285.53	40633.1	1008.16	control	control_spike-calibration	LC Internal Use
1242	xbz_1728	UGAGAACUGAAUUCCAUAGGCUGU	41	2	4186.82	71.7982	9427.6	193.508	experimental
1243	he_25103	UGGCUCAGUUCAGCAGGAACAGGA	41	3	1507.08	54.738	4412.43	110.051	experimental
1244	xbz_8338	UGAGGUAGUAGGUUGUGUGGUU	41	4	5411.23	73.6453	15836.8	335.191	experimental
1245	he_42703	AAUUCUGAAACUAUUUACUUACA	41	5	118.639	4.64931	36.4074	1.94329	experimental
1246	xbz_3182	UCCUCGUUAGUAUAGUGGUUAGUAUCCCCG	41	6	34240.4	396.017	27894.7	342.236	experimental
1247	he_46242	GUUUAUGUAGCUUACUUCCUCAAAGCAAUA	41	7	15174.2	195.486	2493.81	63.8442	experimental
1248	he_12588	GCUGAUGAUGAUAAUAUUGCCUGAAG	41	8	114.963	5.63023	68.7778	8.28842	experimental
1249	he_36384	ACCGUGGCUUUCGAUUGUUACU	41	9	106.509	5.18354	34.0463	1.6083	experimental
1250	he_7624	UGCUACCCCCUGCAGGAUUUGGAUACAU	41	10	113.222	7.33744	34.9074	2.30212	experimental
1251	a2-PUC2PM-20B		41	11	15935.2	330.356	35844.4	404.405	control	control_spike-calibration	LC Internal Use
1252	xbz_1728	UGAGAACUGAAUUCCAUAGGCUGU	41	12	3687.4	111.49	10139.3	315.647	experimental
1253	he_25103	UGGCUCAGUUCAGCAGGAACAGGA	41	13	1397.01	51.5294	5023.69	117.643	experimental
1254	xbz_8338	UGAGGUAGUAGGUUGUGUGGUU	41	14	4759.12	132.422	17201.4	528.462	experimental
1255	he_42703	AAUUCUGAAACUAUUUACUUACA	41	15	100.926	5.76924	36.0185	2.59396	experimental
1256	xbz_3182	UCCUCGUUAGUAUAGUGGUUAGUAUCCCCG	41	16	30415.5	385.342	29020.9	380.536	experimental
1257	he_46242	GUUUAUGUAGCUUACUUCCUCAAAGCAAUA	41	17	13894.5	157.801	2442.87	73.5059	experimental
1258	he_12588	GCUGAUGAUGAUAAUAUUGCCUGAAG	41	18	104.528	5.78664	66.3889	10.7345	experimental
1259	he_36384	ACCGUGGCUUUCGAUUGUUACU	41	19	96.0278	7.87574	33.0278	2.12004	experimental
1260	he_7624	UGCUACCCCCUGCAGGAUUUGGAUACAU	41	20	103.824	6.50353	33.9259	2.71274	experimental
1261	a2-PUC2PM-20B		41	21	15938.6	181.67	32994	362.549	control	control_spike-calibration	LC Internal Use
1262	xbz_1728	UGAGAACUGAAUUCCAUAGGCUGU	41	22	3862.81	118.258	9413.2	222.91	experimental
1263	he_25103	UGGCUCAGUUCAGCAGGAACAGGA	41	23	1451.98	33.3052	4569.49	58.6602	experimental
1264	xbz_8338	UGAGGUAGUAGGUUGUGUGGUU	41	24	5322.01	66.8527	16048.7	373.453	experimental
1265	he_42703	AAUUCUGAAACUAUUUACUUACA	41	25	119.861	4.88457	35.2222	1.70942	experimental
1266	xbz_3182	UCCUCGUUAGUAUAGUGGUUAGUAUCCCCG	41	26	36193.8	328.423	30055.1	504.003	experimental
1267	he_46242	GUUUAUGUAGCUUACUUCCUCAAAGCAAUA	41	27	16601.4	166.868	2581.79	98.4646	experimental
1268	he_12588	GCUGAUGAUGAUAAUAUUGCCUGAAG	41	28	123.315	5.66948	67.0185	5.13187	experimental
1269	he_36384	ACCGUGGCUUUCGAUUGUUACU	41	29	124.75	6.56545	32.4907	1.69383	experimental
1270	he_7624	UGCUACCCCCUGCAGGAUUUGGAUACAU	41	30	125.38	7.4917	34.6296	2.47451	experimental
1271	a2-PUC2PM-20B		41	31	20625.6	228.037	38870.2	164.636	control	control_spike-calibration	LC Internal Use
1272	a2-PUC2MM-20B		42	1	122.565	11.2135	37.0833	3.18913	control	control_spike-calibration	LC Internal Use
1273	xbz_10532	GGAAAGCGUCGCGGU	42	2	293.333	14.614	383.694	35.6419	experimental
1274	xbz_23158	GUUUGAUUGCUGUCGGAGCCA	42	3	112.37	6.45124	31.3426	2.58378	experimental
1275	xbz_12440	UCUGUGUCUGAAUCUGUUAG	42	4	112.287	5.82141	31.5185	1.6262	experimental
1276	he_38410	GGGGUUCCUGGGGAUGGGAUUU	42	5	220.389	16.3197	55.2685	5.07625	experimental
1277	xbz_4623	GGGGGUAUAGCUCAGUGGGUAGAGCAUUUG	42	6	28890.7	522.559	23930.8	325.433	experimental
1278	he_46408	GAGAAAGCUCAUAAGAACUGCUAACU	42	7	4214	115.62	1212.61	77.0102	experimental
1279	he_13183	UCAGAGAGCUAUCUUAAGAGCAAGAAA	42	8	235.028	13.8567	270.731	19.2551	experimental
1280	he_46244	GAGUCACAGUCCGAUGA	42	9	113.759	6.12772	33.787	2.63354	experimental
1281	he_15138	AAGCCCGGAAGGUGGAGAUUGCAGUG	42	10	124.361	5.49504	90.1481	10.2107	experimental
1282	a2-PUC2MM-20B		42	11	113.269	6.98143	40.4537	4.29384	control	control_spike-calibration	LC Internal Use
1283	xbz_10532	GGAAAGCGUCGCGGU	42	12	295.528	18.9626	434.019	39.752	experimental
1284	xbz_23158	GUUUGAUUGCUGUCGGAGCCA	42	13	108.278	7.19142	35.1204	3.13472	experimental
1285	xbz_12440	UCUGUGUCUGAAUCUGUUAG	42	14	96.3241	6.52934	31.963	1.94276	experimental
1286	he_38410	GGGGUUCCUGGGGAUGGGAUUU	42	15	191.639	14.4257	54.6852	7.99374	experimental
1287	xbz_4623	GGGGGUAUAGCUCAGUGGGUAGAGCAUUUG	42	16	25646.3	239.702	24125.1	148.986	experimental
1288	he_46408	GAGAAAGCUCAUAAGAACUGCUAACU	42	17	4022.34	92.3624	1227.26	72.8266	experimental
1289	he_13183	UCAGAGAGCUAUCUUAAGAGCAAGAAA	42	18	207.296	17.0668	255.417	23.8696	experimental
1290	he_46244	GAGUCACAGUCCGAUGA	42	19	104.954	7.55835	33.5648	2.48462	experimental
1291	he_15138	AAGCCCGGAAGGUGGAGAUUGCAGUG	42	20	121.444	8.85958	78.8148	8.42021	experimental
1292	a2-PUC2MM-20B		42	21	107.167	8.55494	36.5093	4.56008	control	control_spike-calibration	LC Internal Use
1293	xbz_10532	GGAAAGCGUCGCGGU	42	22	301.157	15.4382	393.843	44.0707	experimental
1294	xbz_23158	GUUUGAUUGCUGUCGGAGCCA	42	23	111.519	5.43179	32.1111	1.81032	experimental
1295	xbz_12440	UCUGUGUCUGAAUCUGUUAG	42	24	109.519	5.89389	31.9815	1.8085	experimental
1296	he_38410	GGGGUUCCUGGGGAUGGGAUUU	42	25	226.324	12.0961	54.5741	8.34782	experimental
1297	xbz_4623	GGGGGUAUAGCUCAGUGGGUAGAGCAUUUG	42	26	30604.2	167.555	25132.3	274.079	experimental
1298	he_46408	GAGAAAGCUCAUAAGAACUGCUAACU	42	27	4778.99	91.7013	1237.46	55.318	experimental
1299	he_13183	UCAGAGAGCUAUCUUAAGAGCAAGAAA	42	28	262.935	16.5181	272.491	29.258	experimental
1300	he_46244	GAGUCACAGUCCGAUGA	42	29	123.991	8.1131	31.9815	1.43378	experimental
1301	he_15138	AAGCCCGGAAGGUGGAGAUUGCAGUG	42	30	148.5	9.68813	98.6019	13.7996	experimental
1302	a2-PUC2MM-20B		42	31	137.241	8.56735	40.8981	3.51217	control	control_spike-calibration	LC Internal Use
1303	a3-PUC2PM-20B		43	1	18193.3	183.249	39417.7	917.774	control	control_spike-calibration	LC Internal Use
1304	xbz_4815	CGGGGUUUUGAGGGCGAGAUGA	43	2	125.537	6.66898	37.1296	2.20489	experimental
1305	xbz_24446	CUGGAUUGUGGGGUAAGCUA	43	3	6571.94	112.029	10328.8	192.136	experimental
1306	xbz_5256	AAGGUAUUUGAAAAACCAU	43	4	111.963	6.51372	35.287	2.40347	experimental
1307	he_49595	CCGCACUGUGGGUACUUGCUGC	43	5	193.954	13.7551	134.065	16.7239	experimental
1308	xbz_5246	GCGUUGGUGGUAUAGUGGUAAGCAUAGCUG	43	6	35878.1	531.164	26137.7	319.708	experimental
1309	he_46690	UAAUCUGUCACUCUGAAGGCUUUGUUAU	43	7	125.639	6.83101	43.1852	4.02596	experimental
1310	he_13555	GGGGAUGUAGCUCAGUGGUAGAGCGCG	43	8	19134	230.056	23555.2	239.235	experimental
1311	he_36597	AGCUACAUUUGGCUGGGUCU	43	9	367.472	17.3784	698.62	56.7534	experimental
1312	he_15155	AAAAUAGAUCUGACUUAAGAACUAAA	43	10	106.38	4.7826	34.7593	2.84776	experimental
1313	a3-PUC2PM-20B		43	11	15705.8	117.421	35704.8	456.884	control	control_spike-calibration	LC Internal Use
1314	xbz_4815	CGGGGUUUUGAGGGCGAGAUGA	43	12	114.426	7.66373	42.3981	2.92568	experimental
1315	xbz_24446	CUGGAUUGUGGGGUAAGCUA	43	13	5843.82	78.1892	11358.2	189.108	experimental
1316	xbz_5256	AAGGUAUUUGAAAAACCAU	43	14	99.9444	6.71841	33.5	2.58139	experimental
1317	he_49595	CCGCACUGUGGGUACUUGCUGC	43	15	168.472	14.7556	122.63	15.9746	experimental
1318	xbz_5246	GCGUUGGUGGUAUAGUGGUAAGCAUAGCUG	43	16	31906.8	244.896	26484.9	262.257	experimental
1319	he_46690	UAAUCUGUCACUCUGAAGGCUUUGUUAU	43	17	110.222	5.83629	42.4352	2.41983	experimental
1320	he_13555	GGGGAUGUAGCUCAGUGGUAGAGCGCG	43	18	18970.9	249.297	22877.8	382.038	experimental
1321	he_36597	AGCUACAUUUGGCUGGGUCU	43	19	356.463	25.7865	678.694	29.6693	experimental
1322	he_15155	AAAAUAGAUCUGACUUAAGAACUAAA	43	20	100.815	5.57221	32.1574	2.21786	experimental
1323	a3-PUC2PM-20B		43	21	15708.2	220.413	32935.5	373.368	control	control_spike-calibration	LC Internal Use
1324	xbz_4815	CGGGGUUUUGAGGGCGAGAUGA	43	22	114.88	8.1856	40.1667	4.60901	experimental
1325	xbz_24446	CUGGAUUGUGGGGUAAGCUA	43	23	6098.44	115.173	10451.5	147.706	experimental
1326	xbz_5256	AAGGUAUUUGAAAAACCAU	43	24	109.722	5.94654	33.9074	1.51341	experimental
1327	he_49595	CCGCACUGUGGGUACUUGCUGC	43	25	196.907	11.4586	132.176	19.2431	experimental
1328	xbz_5246	GCGUUGGUGGUAUAGUGGUAAGCAUAGCUG	43	26	38498.3	346.276	26588.4	376.469	experimental
1329	he_46690	UAAUCUGUCACUCUGAAGGCUUUGUUAU	43	27	141.657	7.32575	43.9074	3.76044	experimental
1330	he_13555	GGGGAUGUAGCUCAGUGGUAGAGCGCG	43	28	22368.3	161.712	25580.7	472.672	experimental
1331	he_36597	AGCUACAUUUGGCUGGGUCU	43	29	445.889	22.6226	777.889	44.2041	experimental
1332	he_15155	AAAAUAGAUCUGACUUAAGAACUAAA	43	30	118.481	6.67466	33.213	2.62287	experimental
1333	a3-PUC2PM-20B		43	31	20173.2	160.88	38632.9	245.603	control	control_spike-calibration	LC Internal Use
1334	a3-PUC2MM-20B		44	1	119.963	8.72736	34.787	2.49879	control	control_spike-calibration	LC Internal Use
1335	xbz_865	AAAUAUAUUGUUGACUUGU	44	2	110.194	6.89231	29.9444	1.79737	experimental
1336	xbz_15773	CUCACUGAACAAUGAAUGCAA	44	3	112.278	7.80227	30.9907	2.57048	experimental
1337	xbz_14453	CAUACUUGUUGGAGUA	44	4	112.722	6.67515	33.4722	1.89667	experimental
1338	he_36724	AAACCGUUACCAUUACUGAGUU	44	5	113.5	7.39853	35.037	2.21265	experimental
1339	xbz_7200	GGGGAUGUAGCUCAGUGGUAGAGCGCG	44	6	20402.3	438.455	23103.3	183.526	experimental
1340	he_46744	AGAACGUGUGGAAAACUAAUGACUGAGCA	44	7	153.694	10.7568	949.019	44.7462	experimental
1341	he_13758	AGGGGUAUAGCUCAGUGGGGAGCAUUUG	44	8	31324.3	370.982	23905.4	265.04	experimental
1342	he_44348	GCGCUGAGGCUCUCACGCCUGUGAUGGA	44	9	113.454	7.84354	38.1111	2.44694	experimental
1343	he_15187	AAGGAUUAGGAAAUAGAUUUUAACAA	44	10	102.38	4.65786	33.4167	3.04829	experimental
1344	a3-PUC2MM-20B		44	11	107.25	4.39014	43.3796	4.76105	control	control_spike-calibration	LC Internal Use
1345	xbz_865	AAAUAUAUUGUUGACUUGU	44	12	98.9259	4.38072	32.463	1.94516	experimental
1346	xbz_15773	CUCACUGAACAAUGAAUGCAA	44	13	101.417	5.58055	33.5556	2.39678	experimental
1347	xbz_14453	CAUACUUGUUGGAGUA	44	14	102.185	5.03845	32.2685	2.19433	experimental
1348	he_36724	AAACCGUUACCAUUACUGAGUU	44	15	101.713	9.00784	33.8611	2.45124	experimental
1349	xbz_7200	GGGGAUGUAGCUCAGUGGUAGAGCGCG	44	16	18199.1	374.278	23338.1	267.334	experimental
1350	he_46744	AGAACGUGUGGAAAACUAAUGACUGAGCA	44	17	136.176	7.57866	889.898	51.6813	experimental
1351	he_13758	AGGGGUAUAGCUCAGUGGGGAGCAUUUG	44	18	30898.4	299.505	23848.5	244.425	experimental
1352	he_44348	GCGCUGAGGCUCUCACGCCUGUGAUGGA	44	19	103.046	8.57663	37.8148	2.95811	experimental
1353	he_15187	AAGGAUUAGGAAAUAGAUUUUAACAA	44	20	95.2963	5.10865	30.8241	1.37962	experimental
1354	a3-PUC2MM-20B		44	21	105.954	6.77459	37.1389	3.77512	control	control_spike-calibration	LC Internal Use
1355	xbz_865	AAAUAUAUUGUUGACUUGU	44	22	97.7037	4.61663	29.8333	2.38571	experimental
1356	xbz_15773	CUCACUGAACAAUGAAUGCAA	44	23	105.898	5.45832	32.5278	1.98809	experimental
1357	xbz_14453	CAUACUUGUUGGAGUA	44	24	117.5	4.60901	33.3704	1.82195	experimental
1358	he_36724	AAACCGUUACCAUUACUGAGUU	44	25	118.278	4.58326	35.8889	2.83942	experimental
1359	xbz_7200	GGGGAUGUAGCUCAGUGGUAGAGCGCG	44	26	21777.6	188.961	23605.5	264.862	experimental
1360	he_46744	AGAACGUGUGGAAAACUAAUGACUGAGCA	44	27	169.75	6.7535	860.704	39.9173	experimental
1361	he_13758	AGGGGUAUAGCUCAGUGGGGAGCAUUUG	44	28	36211.3	308.133	26479	500.598	experimental
1362	he_44348	GCGCUGAGGCUCUCACGCCUGUGAUGGA	44	29	126.37	7.27895	36.4907	2.78009	experimental
1363	he_15187	AAGGAUUAGGAAAUAGAUUUUAACAA	44	30	124.213	6.76308	31.463	1.81595	experimental
1364	a3-PUC2MM-20B		44	31	131.213	6.90124	40.6944	3.0401	control	control_spike-calibration	LC Internal Use
1365	a-PUC2PM		45	1	15914.8	201.874	30395.1	784.483	control	control_spike-calibration	LC Internal Use
1366	xbz_785	UUGCUUAUAGACUGAUUUUGA	45	2	111.63	7.31864	32.1389	2.38554	experimental
1367	xbz_15823	UAGCACCAUUUGAAAUCAGUGUUU	45	3	120.648	5.73286	208.991	15.2257	experimental
1368	xbz_8050	UGAGGUAGUAGGUUGUAUGGUU	45	4	6298.83	120.635	18974.4	328.488	experimental
1369	he_38783	GCAAAGCACACGGCCUGCAGAGAGG	45	5	136.694	10.0897	49.6944	4.21049	experimental
1370	xbz_10910	UUACUUCGAGUACAUUGUAACCACCU	45	6	216.278	15.0779	58.5093	7.62251	experimental
1371	he_46823	UCAUCAGUAUAGUGGUGAGUAUCCCC	45	7	28904.6	166.979	28446.5	151.451	experimental
1372	he_13856	CCUCCCACUGCUAAAUUUGACUGGCUU	45	8	23117	295.642	10706.2	112.372	experimental
1373	he_29243	UGGAAGACUAUUGUUGUUCUUA	45	9	107.62	6.09077	33.6389	1.6318	experimental
1374	he_15199	AUAUUGAACUUGAAAAUAAAAAAUUA	45	10	102.87	5.35836	34.9815	1.70201	experimental
1375	a-PUC2PM		45	11	13581.6	134.854	29044.2	315.277	control	control_spike-calibration	LC Internal Use
1376	xbz_785	UUGCUUAUAGACUGAUUUUGA	45	12	101.861	5.5188	35.3611	2.21067	experimental
1377	xbz_15823	UAGCACCAUUUGAAAUCAGUGUUU	45	13	116.963	9.16712	237.685	19.2109	experimental
1378	xbz_8050	UGAGGUAGUAGGUUGUAUGGUU	45	14	5410.37	99.3023	20775.1	268.561	experimental
1379	he_38783	GCAAAGCACACGGCCUGCAGAGAGG	45	15	116.102	9.70012	47.6481	5.51686	experimental
1380	xbz_10910	UUACUUCGAGUACAUUGUAACCACCU	45	16	196.602	17.9068	61.0833	6.82919	experimental
1381	he_46823	UCAUCAGUAUAGUGGUGAGUAUCCCC	45	17	26569.8	341.211	27743.6	249.781	experimental
1382	he_13856	CCUCCCACUGCUAAAUUUGACUGGCUU	45	18	22775.9	245.675	10148.8	157.219	experimental
1383	he_29243	UGGAAGACUAUUGUUGUUCUUA	45	19	95.8611	5.73147	33.8056	1.83659	experimental
1384	he_15199	AUAUUGAACUUGAAAAUAAAAAAUUA	45	20	100.574	7.56925	32.037	2.79494	experimental
1385	a-PUC2PM		45	21	13711.2	99.2839	26369.1	355.758	control	control_spike-calibration	LC Internal Use
1386	xbz_785	UUGCUUAUAGACUGAUUUUGA	45	22	102.611	6.10628	33.2593	2.32166	experimental
1387	xbz_15823	UAGCACCAUUUGAAAUCAGUGUUU	45	23	114.38	6.63285	252.009	30.878	experimental
1388	xbz_8050	UGAGGUAGUAGGUUGUAUGGUU	45	24	6098.34	123.879	19171.9	259.71	experimental
1389	he_38783	GCAAAGCACACGGCCUGCAGAGAGG	45	25	146.926	8.47504	51.8333	7.52504	experimental
1390	xbz_10910	UUACUUCGAGUACAUUGUAACCACCU	45	26	251.148	21.096	60.4815	7.0717	experimental
1391	he_46823	UCAUCAGUAUAGUGGUGAGUAUCCCC	45	27	31820.8	250.235	29204.4	499.541	experimental
1392	he_13856	CCUCCCACUGCUAAAUUUGACUGGCUU	45	28	26836.6	217.579	10872.3	189.944	experimental
1393	he_29243	UGGAAGACUAUUGUUGUUCUUA	45	29	123.731	7.81994	32.9722	2.03914	experimental
1394	he_15199	AUAUUGAACUUGAAAAUAAAAAAUUA	45	30	127.38	8.82299	32.7222	1.87374	experimental
1395	a-PUC2PM		45	31	17402.6	163.882	30998.4	178.443	control	control_spike-calibration	LC Internal Use
1396	a-PUC2MM2d		46	1	340.685	28.541	134.833	14.8125	control	control_spike-calibration	LC Internal Use
1397	xbz_8958	GGCCAGUUGGUGAAGCAGUU	46	2	4740.36	193.649	797.259	62.0733	experimental
1398	xbz_26760	AGUUGGUUACAGCUUGGUGU	46	3	110.954	6.51438	32.4352	1.9588	experimental
1399	xbz_9344	CACUAGAUUGUGAGCUCCUGGA	46	4	179.861	13.6672	113.102	10.9595	experimental
1400	he_49836	UAGCACCAUCUGAAAUCGGUUA	46	5	1558.14	49.5634	6693.95	127.628	experimental
1401	xbz_11316	GUUUCCGUAGUGUAGUGGUUAUCACGUUU	46	6	11997.7	277.001	20387.4	208.194	experimental
1402	he_47085	GGGGGUAUAGCUCAGGGGUAGAGCAUCG	46	7	33587.1	305.832	25939.7	328.676	experimental
1403	he_13939	GCCCCAGUUGCCUAAUGGAUAAGGCACUG	46	8	2372.51	61.1978	2322.04	90.0867	experimental
1404	he_52022	CGUCCCGCUCCGGGGACAGUG	46	9	466.046	29.2911	1097.08	63.9809	experimental
1405	he_15200	UACUAAACUCACAAGCGUACCUCCUAUUU	46	10	107.713	7.2267	31.2963	2.34923	experimental
1406	a-PUC2MM2d		46	11	307.722	28.8971	163.157	21.5503	control	control_spike-calibration	LC Internal Use
1407	xbz_8958	GGCCAGUUGGUGAAGCAGUU	46	12	4051.75	164.351	859.676	42.0789	experimental
1408	xbz_26760	AGUUGGUUACAGCUUGGUGU	46	13	107.148	5.54137	34.3704	2.3064	experimental
1409	xbz_9344	CACUAGAUUGUGAGCUCCUGGA	46	14	159.5	9.14218	102.176	10.0873	experimental
1410	he_49836	UAGCACCAUCUGAAAUCGGUUA	46	15	1291.23	42.8605	6963.02	125.161	experimental
1411	xbz_11316	GUUUCCGUAGUGUAGUGGUUAUCACGUUU	46	16	10863.2	185.203	20364.4	142.243	experimental
1412	he_47085	GGGGGUAUAGCUCAGGGGUAGAGCAUCG	46	17	31288.4	359.546	25785.1	267.74	experimental
1413	he_13939	GCCCCAGUUGCCUAAUGGAUAAGGCACUG	46	18	2347.85	110.068	2198.75	96.8706	experimental
1414	he_52022	CGUCCCGCUCCGGGGACAGUG	46	19	463.435	23.2738	1049.06	73.8998	experimental
1415	he_15200	UACUAAACUCACAAGCGUACCUCCUAUUU	46	20	97.0463	7.4713	30.8148	1.58349	experimental
1416	a-PUC2MM2d		46	21	315.074	27.0889	140.583	17.9486	control	control_spike-calibration	LC Internal Use
1417	xbz_8958	GGCCAGUUGGUGAAGCAGUU	46	22	4296.2	150.384	877.269	64.2647	experimental
1418	xbz_26760	AGUUGGUUACAGCUUGGUGU	46	23	107.843	7.04082	31.8333	2.32218	experimental
1419	xbz_9344	CACUAGAUUGUGAGCUCCUGGA	46	24	178.704	11.7619	111.222	11.1106	experimental
1420	he_49836	UAGCACCAUCUGAAAUCGGUUA	46	25	1523.06	42.6865	6361.43	87.6867	experimental
1421	xbz_11316	GUUUCCGUAGUGUAGUGGUUAUCACGUUU	46	26	13116.2	104.719	20119.2	256.1	experimental
1422	he_47085	GGGGGUAUAGCUCAGGGGUAGAGCAUCG	46	27	37438.6	139.676	27312.1	451.433	experimental
1423	he_13939	GCCCCAGUUGCCUAAUGGAUAAGGCACUG	46	28	2851.37	66.7739	2355.73	79.0672	experimental
1424	he_52022	CGUCCCGCUCCGGGGACAGUG	46	29	603.241	25.8362	1199.48	64.0161	experimental
1425	he_15200	UACUAAACUCACAAGCGUACCUCCUAUUU	46	30	122.037	6.68507	31.1481	2.06355	experimental
1426	a-PUC2MM2d		46	31	470.231	45.4203	188.88	26.1672	control	control_spike-calibration	LC Internal Use
1427	Ctr01-2P		47	1	452.926	28.159	566.287	54.2919	control	control_spike-calibration	LC Internal Use
1428	xbz_10964	CAGGGCGCACCACCGGCCCG	47	2	526.981	19.8207	801.241	42.2009	experimental
1429	xbz_21134	CUGGAGAUAUGGAAGAGCUGUGU	47	3	122.167	6.60006	42.6481	4.54945	experimental
1430	xbz_3733	UAAGGUGCAUCUAGUGCAGAU	47	4	134.093	5.63457	91.2593	9.17164	experimental
1431	he_27523	CAAAGAAUUCUCCUUUUGGGCUU	47	5	122.37	4.5046	38.5	3.23965	experimental
1432	xbz_12781	GGGGGCAUAGCUCAGUGGUAGAGCAUUU	47	6	26048.4	471.143	24139.5	341.717	experimental
1433	he_47213	GUUUCCGUAGUGUAGUGGUCAUCACGUUC	47	7	13822.9	144.842	24416.7	417.747	experimental
1434	he_14017	CCCCUGGUGGUCUAGUGGUUAGGAUUCGG	47	8	37253.6	376.317	24238.6	283.644	experimental
1435	he_53549	GGGAGCCAGGAAGUAUUGAUGUU	47	9	126.343	6.9634	50.2315	5.11294	experimental
1436	he_15201	CAAACAGAUUAAGACAUGGGAGGUAUG	47	10	131.556	8.76946	52.8148	7.27837	experimental
1437	Ctr01-2P		47	11	409.426	20.6081	618.102	40.183	control	control_spike-calibration	LC Internal Use
1438	xbz_10964	CAGGGCGCACCACCGGCCCG	47	12	456.806	17.0811	893.972	49.7441	experimental
1439	xbz_21134	CUGGAGAUAUGGAAGAGCUGUGU	47	13	114.056	6.57641	50.4259	6.43037	experimental
1440	xbz_3733	UAAGGUGCAUCUAGUGCAGAU	47	14	118.074	7.98094	85.8241	9.58467	experimental
1441	he_27523	CAAAGAAUUCUCCUUUUGGGCUU	47	15	106.157	8.24526	39.1296	4.072	experimental
1442	xbz_12781	GGGGGCAUAGCUCAGUGGUAGAGCAUUU	47	16	23156.9	283.142	24100.4	343.631	experimental
1443	he_47213	GUUUCCGUAGUGUAGUGGUCAUCACGUUC	47	17	12908.4	203.866	24109.6	268.3	experimental
1444	he_14017	CCCCUGGUGGUCUAGUGGUUAGGAUUCGG	47	18	36654.1	432.069	23696	357.915	experimental
1445	he_53549	GGGAGCCAGGAAGUAUUGAUGUU	47	19	117.38	8.48607	46.5741	4.98447	experimental
1446	he_15201	CAAACAGAUUAAGACAUGGGAGGUAUG	47	20	118.204	7.25215	48.5833	5.17746	experimental
1447	Ctr01-2P		47	21	414.565	24.5293	587.13	52.5629	control	control_spike-calibration	LC Internal Use
1448	xbz_10964	CAGGGCGCACCACCGGCCCG	47	22	469.287	23.0238	797.454	38.7176	experimental
1449	xbz_21134	CUGGAGAUAUGGAAGAGCUGUGU	47	23	117.583	7.63553	47.0463	6.96504	experimental
1450	xbz_3733	UAAGGUGCAUCUAGUGCAGAU	47	24	135.519	6.68166	84.3148	5.66618	experimental
1451	he_27523	CAAAGAAUUCUCCUUUUGGGCUU	47	25	122.259	4.22359	42.2963	2.96477	experimental
1452	xbz_12781	GGGGGCAUAGCUCAGUGGUAGAGCAUUU	47	26	27728.7	135.196	24484.1	397.684	experimental
1453	he_47213	GUUUCCGUAGUGUAGUGGUCAUCACGUUC	47	27	15181.6	114.224	24716.1	285.718	experimental
1454	he_14017	CCCCUGGUGGUCUAGUGGUUAGGAUUCGG	47	28	42883.7	290.332	26451	631.277	experimental
1455	he_53549	GGGAGCCAGGAAGUAUUGAUGUU	47	29	147.028	8.75466	46.5093	4.76454	experimental
1456	he_15201	CAAACAGAUUAAGACAUGGGAGGUAUG	47	30	158.815	9.40685	54.5463	6.56155	experimental
1457	Ctr01-2P		47	31	539.88	33.5004	716.324	42.3538	control	control_spike-calibration	LC Internal Use
1458	Ctr01-2M05		48	1	109.556	7.50742	30.4444	1.55481	control	control_spike-calibration	LC Internal Use
1459	xbz_13756	AGAGGUAGUAGGUUGCAUAGUU	48	2	6185.99	94.4655	18933.3	384.516	experimental
1460	xbz_23885	CGGGUUGUGGGCAUUCU	48	3	157.25	14.3065	40.3241	3.35397	experimental
1461	xbz_6871	AUAGGUAUGGGACAAAUUUA	48	4	112.574	5.49631	32.6296	1.50135	experimental
1462	he_53133	UGAGGUAGUAGAUUGUAUAGUUU	48	5	6361.33	74.5959	19569.5	305.597	experimental
1463	xbz_14113	UGGUAUAUAGUUUAAACAAAACGAAUG	48	6	4609.64	336.333	317.157	28.5507	experimental
1464	he_47479	GGGGAAUUAGCUCAAAUGGUAGAGCGCUC	48	7	4320.03	88.5811	5003.47	162.292	experimental
1465	he_14371	GAUGAUGAUGAGAAGCCUUUUGCUGAGC	48	8	127.102	4.34481	50.3333	5.64362	experimental
1466	he_34409	UUCUGUGAUGAAAAUGCUGAAG	48	9	115.046	7.43368	33.5	3.10411	experimental
1467	he_52822	CAGAGAAUAGUUUAAAUUAGAAUCUUA	48	10	152.407	9.75019	44.8333	6.30013	experimental
1468	Ctr01-2M05		48	11	95.8796	4.30544	32.9537	2.17627	control	control_spike-calibration	LC Internal Use
1469	xbz_13756	AGAGGUAGUAGGUUGCAUAGUU	48	12	5355.69	212.878	20337.3	524.539	experimental
1470	xbz_23885	CGGGUUGUGGGCAUUCU	48	13	148.352	8.64169	42.25	3.14784	experimental
1471	xbz_6871	AUAGGUAUGGGACAAAUUUA	48	14	99.6574	9.34806	33.1944	1.71556	experimental
1472	he_53133	UGAGGUAGUAGAUUGUAUAGUUU	48	15	5568.07	121.829	20019.2	297.526	experimental
1473	xbz_14113	UGGUAUAUAGUUUAAACAAAACGAAUG	48	16	4626.78	376.958	332.981	47.6047	experimental
1474	he_47479	GGGGAAUUAGCUCAAAUGGUAGAGCGCUC	48	17	3915.35	119.948	4857.13	137.271	experimental
1475	he_14371	GAUGAUGAUGAGAAGCCUUUUGCUGAGC	48	18	119.87	7.79659	45.9537	3.24508	experimental
1476	he_34409	UUCUGUGAUGAAAAUGCUGAAG	48	19	99.1944	7.10201	33.7037	2.19711	experimental
1477	he_52822	CAGAGAAUAGUUUAAAUUAGAAUCUUA	48	20	154.611	13.5031	40.4259	6.8906	experimental
1478	Ctr01-2M05		48	21	94.3241	5.27351	29.3981	2.6719	control	control_spike-calibration	LC Internal Use
1479	xbz_13756	AGAGGUAGUAGGUUGCAUAGUU	48	22	5718.89	183.024	18845	427.579	experimental
1480	xbz_23885	CGGGUUGUGGGCAUUCU	48	23	156.685	7.16644	39.2593	4.98666	experimental
1481	xbz_6871	AUAGGUAUGGGACAAAUUUA	48	24	106.676	5.71574	32.7963	2.01285	experimental
1482	he_53133	UGAGGUAGUAGAUUGUAUAGUUU	48	25	6437.31	86.2306	18878.4	291.162	experimental
1483	xbz_14113	UGGUAUAUAGUUUAAACAAAACGAAUG	48	26	6069.56	290.962	390.565	31.7329	experimental
1484	he_47479	GGGGAAUUAGCUCAAAUGGUAGAGCGCUC	48	27	4732.1	110.942	4762.98	192.274	experimental
1485	he_14371	GAUGAUGAUGAGAAGCCUUUUGCUGAGC	48	28	145.037	7.28451	47.463	4.92453	experimental
1486	he_34409	UUCUGUGAUGAAAAUGCUGAAG	48	29	126.324	8.99411	32.9352	2.13679	experimental
1487	he_52822	CAGAGAAUAGUUUAAAUUAGAAUCUUA	48	30	197.62	14.9095	43.7315	7.89843	experimental
1488	Ctr01-2M05		48	31	123.861	4.28529	30.9352	2.12802	control	control_spike-calibration	LC Internal Use
1489	Ctr01-2M10		49	1	110.796	7.54644	31.5278	2.8167	control	control_spike-calibration	LC Internal Use
1490	xbz_3606	UAAUUUCAUCAUCCUCAGUCA	49	2	107.583	6.79627	31.6204	1.89301	experimental
1491	xbz_21086	AGGGCUUAGCUGCUUGUGAGCA	49	3	149.806	9.00515	33.0741	3.12573	experimental
1492	xbz_3197	UAGUUUGAUUACUAGCACUUGU	49	4	110.519	5.51037	32.5833	1.46693	experimental
1493	he_31641	UGAGGUAGUAGGUUGUAUAGUUUA	49	5	6662.09	76.6137	20849.3	333.601	experimental
1494	xbz_14128	AUUGUGAAUCUGACAACAGAGGCUUA	49	6	21353.1	337.242	5893.15	125.754	experimental
1495	he_47496	GCUUCUGUAGUGUAGUGGUUAUCACGUUC	49	7	11255.7	103.627	17241.3	190.286	experimental
1496	he_14386	AUCACUGAUGUCUCCAUGUCUCUGAGCAA	49	8	221.148	16.917	10049.1	222.791	experimental
1497	he_42208	GGAGGAACCUUGGAGCUUCGGC	49	9	130.019	9.1396	39.6759	4.15771	experimental
1498	he_52722	AGCUCCGAGGUGAUUUUCAUAUUGAA	49	10	2779.58	78.2159	302.454	25.3917	experimental
1499	Ctr01-2M10		49	11	102.213	4.78325	33.1759	1.15061	control	control_spike-calibration	LC Internal Use
1500	xbz_3606	UAAUUUCAUCAUCCUCAGUCA	49	12	105.204	6.64417	35.2685	2.62841	experimental
1501	xbz_21086	AGGGCUUAGCUGCUUGUGAGCA	49	13	137.259	9.98725	37.2963	1.87586	experimental
1502	xbz_3197	UAGUUUGAUUACUAGCACUUGU	49	14	95.0185	8.43887	33.2037	2.6502	experimental
1503	he_31641	UGAGGUAGUAGGUUGUAUAGUUUA	49	15	5894.2	98.6834	21419.7	205.988	experimental
1504	xbz_14128	AUUGUGAAUCUGACAACAGAGGCUUA	49	16	18970.6	303.491	5716.09	97.6868	experimental
1505	he_47496	GCUUCUGUAGUGUAGUGGUUAUCACGUUC	49	17	10527.1	181.989	16957.6	213.667	experimental
1506	he_14386	AUCACUGAUGUCUCCAUGUCUCUGAGCAA	49	18	202.574	14.0101	9597.83	150.995	experimental
1507	he_42208	GGAGGAACCUUGGAGCUUCGGC	49	19	116.463	6.52447	36.8056	2.52264	experimental
1508	he_52722	AGCUCCGAGGUGAUUUUCAUAUUGAA	49	20	2731.92	89.3358	277.944	27.4869	experimental
1509	Ctr01-2M10		49	21	99.5926	9.47997	30.3704	2.33059	control	control_spike-calibration	LC Internal Use
1510	xbz_3606	UAAUUUCAUCAUCCUCAGUCA	49	22	100.046	6.29105	30.8241	2.72348	experimental
1511	xbz_21086	AGGGCUUAGCUGCUUGUGAGCA	49	23	138.019	9.69149	35.4907	3.45463	experimental
1512	xbz_3197	UAGUUUGAUUACUAGCACUUGU	49	24	107.954	7.02384	33.5648	2.31724	experimental
1513	he_31641	UGAGGUAGUAGGUUGUAUAGUUUA	49	25	6723.2	158.137	20299.2	308.203	experimental
1514	xbz_14128	AUUGUGAAUCUGACAACAGAGGCUUA	49	26	22780.6	169.365	5511.37	107.427	experimental
1515	he_47496	GCUUCUGUAGUGUAGUGGUUAUCACGUUC	49	27	12647.4	184.999	17198.6	331.544	experimental
1516	he_14386	AUCACUGAUGUCUCCAUGUCUCUGAGCAA	49	28	249.102	10.5272	10038.4	180.331	experimental
1517	he_42208	GGAGGAACCUUGGAGCUUCGGC	49	29	150.593	16.3324	37.3333	4.9047	experimental
1518	he_52722	AGCUCCGAGGUGAUUUUCAUAUUGAA	49	30	3650.1	79.9786	367.843	37.9084	experimental
1519	Ctr01-2M10		49	31	130.065	7.7463	30.3148	2.1515	control	control_spike-calibration	LC Internal Use
1520	Ctr02-2P		50	1	118.12	10.3542	31.287	1.8396	control	control_spike-calibration	LC Internal Use
1521	xbz_11312	AUAACAUUGUAAAGCGCUUCUU	50	2	108.167	6.85565	30.4074	2.09154	experimental
1522	xbz_29532	CAAGUCACUAGUGGUUCCGUUU	50	3	359.083	18.6237	844.222	42.9153	experimental
1523	xbz_2993	UCAGUGCAUCACAGAACUUUGU	50	4	118.5	7.43508	44.1852	3.1892	experimental
1524	he_28712	ACCAUCGACCGUUGAUUGUACC	50	5	146.722	10.3018	40.5278	4.03596	experimental
1525	xbz_14675	GCCCUGUGGUCUAGUGGUUAGGAUUCUG	50	6	40612.7	468.282	22405.8	316.171	experimental
1526	he_47498	GCCUGGGUAGCUCAGUCGGUAGAGCAUCA	50	7	14999.9	190.761	15158	302.559	experimental
1527	he_14393	GGAGGUGAUGAACUGUCUGAGCCUGACC	50	8	137.12	10.5722	1281.46	28.7677	experimental
1528	he_4491	CUUUGCACGCGUGGGUUCGAAUCCCA	50	9	342.898	16.643	228.565	18.4057	experimental
1529	he_25690	GUUAAGAUGGCAGAGCCCGGUAAUCG	50	10	32077	412.338	16226	183.935	experimental
1530	Ctr02-2P		50	11	104.472	4.87883	33.0185	1.78771	control	control_spike-calibration	LC Internal Use
1531	xbz_11312	AUAACAUUGUAAAGCGCUUCUU	50	12	104.435	6.72459	34.8704	2.17072	experimental
1532	xbz_29532	CAAGUCACUAGUGGUUCCGUUU	50	13	356.509	17.5465	889.185	63.5819	experimental
1533	xbz_2993	UCAGUGCAUCACAGAACUUUGU	50	14	100.093	6.07975	44.4259	5.27771	experimental
1534	he_28712	ACCAUCGACCGUUGAUUGUACC	50	15	125.935	11.7069	40.4722	3.87288	experimental
1535	xbz_14675	GCCCUGUGGUCUAGUGGUUAGGAUUCUG	50	16	36008.1	358.107	22548.4	483.272	experimental
1536	he_47498	GCCUGGGUAGCUCAGUCGGUAGAGCAUCA	50	17	13716.1	217.331	14991.4	149.11	experimental
1537	he_14393	GGAGGUGAUGAACUGUCUGAGCCUGACC	50	18	129.241	9.84257	1180.65	45.4634	experimental
1538	he_4491	CUUUGCACGCGUGGGUUCGAAUCCCA	50	19	343.065	17.367	202.787	19.1331	experimental
1539	he_25690	GUUAAGAUGGCAGAGCCCGGUAAUCG	50	20	31173.8	171.227	14947.3	138.693	experimental
1540	Ctr02-2P		50	21	103.389	5.62344	31.5926	1.71326	control	control_spike-calibration	LC Internal Use
1541	xbz_11312	AUAACAUUGUAAAGCGCUUCUU	50	22	104.639	6.27777	30.037	2.61171	experimental
1542	xbz_29532	CAAGUCACUAGUGGUUCCGUUU	50	23	385.574	30.4325	879.954	48.3178	experimental
1543	xbz_2993	UCAGUGCAUCACAGAACUUUGU	50	24	113.056	5.75973	46.8333	5.58118	experimental
1544	he_28712	ACCAUCGACCGUUGAUUGUACC	50	25	142.417	10.0653	41.3611	3.99406	experimental
1545	xbz_14675	GCCCUGUGGUCUAGUGGUUAGGAUUCUG	50	26	43041.1	247.622	23259.6	347.118	experimental
1546	he_47498	GCCUGGGUAGCUCAGUCGGUAGAGCAUCA	50	27	16516.5	156.931	14919.9	159.061	experimental
1547	he_14393	GGAGGUGAUGAACUGUCUGAGCCUGACC	50	28	153.287	8.28471	1224.97	58.7533	experimental
1548	he_4491	CUUUGCACGCGUGGGUUCGAAUCCCA	50	29	437.815	21.4481	237.056	29.0449	experimental
1549	he_25690	GUUAAGAUGGCAGAGCCCGGUAAUCG	50	30	40513.8	297.727	18021.1	176.84	experimental
1550	Ctr02-2P		50	31	130.269	5.78365	31.4815	2.04383	control	control_spike-calibration	LC Internal Use
1551	Ctr02-2M05		51	1	113.083	5.32868	30.6759	2.61851	control	control_spike-calibration	LC Internal Use
1552	xbz_7667	AGCAGCAUUGUACAGGGCUAUGAAA	51	2	632.87	38.5858	996.722	42.213	experimental
1553	xbz_29172	AGCUACAUUGUCUGCUGGGUUU	51	3	3708.24	89.3738	7091.56	198.518	experimental
1554	xbz_8237	AAAGGAAAAGUUUCUUUGCU	51	4	110.481	4.46478	32.0833	1.66955	experimental
1555	he_36376	AAGCUGCCAGUUGAAGAACUGU	51	5	318.954	19.9445	290.139	23.914	experimental
1556	he_27079	UUCACUGAUGAGAGCAUUGUUCUGAGC	51	6	139.639	10.5498	117.056	7.88922	experimental
1557	he_47500	CUCGAAGAUAUAUGUAUAUAUCCUCU	51	7	114.824	6.93471	36.2222	2.39678	experimental
1558	he_14400	UUCUCUGGCGCAAUGGAUAGCGCAUU	51	8	138.898	9.6731	37.463	3.71767	experimental
1559	he_6837	ACUGCAUUAUGAGCACUUAAAGUA	51	9	109.111	7.26447	33.7963	3.1229	experimental
1560	he_25748	AACAGCUAUCCAUUGGUCUUAGGCCCCA	51	10	6174.3	115.413	3129.39	138.462	experimental
1561	Ctr02-2M05		51	11	101.574	6.34993	31.9074	1.7537	control	control_spike-calibration	LC Internal Use
1562	xbz_7667	AGCAGCAUUGUACAGGGCUAUGAAA	51	12	566.694	28.5989	1135.8	33.3208	experimental
1563	xbz_29172	AGCUACAUUGUCUGCUGGGUUU	51	13	3323.28	69.354	8018.06	117.428	experimental
1564	xbz_8237	AAAGGAAAAGUUUCUUUGCU	51	14	98.6574	6.45641	30.5741	2.26804	experimental
1565	he_36376	AAGCUGCCAGUUGAAGAACUGU	51	15	263.102	18.1854	260.019	19.5218	experimental
1566	he_27079	UUCACUGAUGAGAGCAUUGUUCUGAGC	51	16	129.241	8.33175	112.593	15.253	experimental
1567	he_47500	CUCGAAGAUAUAUGUAUAUAUCCUCU	51	17	103.852	7.57371	34.0093	3.48427	experimental
1568	he_14400	UUCUCUGGCGCAAUGGAUAGCGCAUU	51	18	126.981	6.99263	40.1759	2.83116	experimental
1569	he_6837	ACUGCAUUAUGAGCACUUAAAGUA	51	19	98.1944	6.43219	32.6204	2.15614	experimental
1570	he_25748	AACAGCUAUCCAUUGGUCUUAGGCCCCA	51	20	5966.12	81.1029	2844.83	92.7301	experimental
1571	Ctr02-2M05		51	21	101.065	7.70395	30.8796	2.10792	control	control_spike-calibration	LC Internal Use
1572	xbz_7667	AGCAGCAUUGUACAGGGCUAUGAAA	51	22	564.88	36.6626	1052.48	67.5231	experimental
1573	xbz_29172	AGCUACAUUGUCUGCUGGGUUU	51	23	3547.67	82.2085	7253.24	191.666	experimental
1574	xbz_8237	AAAGGAAAAGUUUCUUUGCU	51	24	104.694	4.28747	33.1852	1.68083	experimental
1575	he_36376	AAGCUGCCAGUUGAAGAACUGU	51	25	306.5	23.1672	277.028	24.4435	experimental
1576	he_27079	UUCACUGAUGAGAGCAUUGUUCUGAGC	51	26	157.157	13.2934	115.787	16.6638	experimental
1577	he_47500	CUCGAAGAUAUAUGUAUAUAUCCUCU	51	27	124.741	9.73708	34.1019	2.98576	experimental
1578	he_14400	UUCUCUGGCGCAAUGGAUAGCGCAUU	51	28	157.481	7.25823	40.3241	4.51959	experimental
1579	he_6837	ACUGCAUUAUGAGCACUUAAAGUA	51	29	120.426	5.66049	30.5833	1.95809	experimental
1580	he_25748	AACAGCUAUCCAUUGGUCUUAGGCCCCA	51	30	7591.72	104.348	3307.78	95.3362	experimental
1581	Ctr02-2M05		51	31	129.046	6.97577	31.4074	2.8153	control	control_spike-calibration	LC Internal Use
1582	Ctr02-2M10		52	1	110.935	7.7968	29.2963	1.77869	control	control_spike-calibration	LC Internal Use
1583	xbz_78	GGCUUGGUCUAGGGGUGUCAU	52	2	121.676	8.55529	45.2037	4.93274	experimental
1584	xbz_29477	CAAAACGUGAGGCGCUGCUAU	52	3	168.519	10.4304	55.3241	6.46606	experimental
1585	xbz_73	CGUUUCUUAGCAGGGCUU	52	4	120.972	6.33999	51.1944	5.25332	experimental
1586	he_37062	UACCCUGUAGAUCCGAAUUUGU	52	5	377.12	23.1621	307.556	30.6678	experimental
1587	he_27218	CUUCUUACUACUGCACUUGACUAGUCU	52	6	5610.81	121.128	5543.47	91.9479	experimental
1588	he_47505	GCCUGGAUAGCUCAGUCGGUAGAGCAUCAG	52	7	15166.2	162.45	22830.1	324.72	experimental
1589	he_15624	CGGGAUGCCUGGGAGUUGCGAUCUGCCCG	52	8	363.426	19.8594	776.528	47.428	experimental
1590	he_11181	CAUGGUGAGGAUGGGGUCGGAGG	52	9	5739.47	184.082	9550.07	204.306	experimental
1591	he_25747	GAGAAAGCUCACAAGAACUGCUAACU	52	10	11085.4	151.229	7051.63	110.157	experimental
1592	Ctr02-2M10		52	11	102.38	3.51424	32.1019	2.08214	control	control_spike-calibration	LC Internal Use
1593	xbz_78	GGCUUGGUCUAGGGGUGUCAU	52	12	112.991	6.218	52.787	5.49095	experimental
1594	xbz_29477	CAAAACGUGAGGCGCUGCUAU	52	13	158.574	14.5539	63.9352	7.15159	experimental
1595	xbz_73	CGUUUCUUAGCAGGGCUU	52	14	104.093	5.15469	43.1574	5.24567	experimental
1596	he_37062	UACCCUGUAGAUCCGAAUUUGU	52	15	318.065	28.189	292.685	26.5983	experimental
1597	he_27218	CUUCUUACUACUGCACUUGACUAGUCU	52	16	4846.8	85.3653	5257.88	185.665	experimental
1598	he_47505	GCCUGGAUAGCUCAGUCGGUAGAGCAUCAG	52	17	13875.6	242.122	22344	456.671	experimental
1599	he_15624	CGGGAUGCCUGGGAGUUGCGAUCUGCCCG	52	18	311.37	14.8869	695.731	27.1667	experimental
1600	he_11181	CAUGGUGAGGAUGGGGUCGGAGG	52	19	5561.57	107.802	9012.88	165.515	experimental
1601	he_25747	GAGAAAGCUCACAAGAACUGCUAACU	52	20	10877.2	117.528	6658.06	172.633	experimental
1602	Ctr02-2M10		52	21	95.9074	10.3658	31.4259	2.90087	control	control_spike-calibration	LC Internal Use
1603	xbz_78	GGCUUGGUCUAGGGGUGUCAU	52	22	115.361	10.5613	51.2685	7.0943	experimental
1604	xbz_29477	CAAAACGUGAGGCGCUGCUAU	52	23	166.926	13.2599	55.0926	5.64948	experimental
1605	xbz_73	CGUUUCUUAGCAGGGCUU	52	24	118.056	9.00761	47.8611	4.23924	experimental
1606	he_37062	UACCCUGUAGAUCCGAAUUUGU	52	25	381.13	24.7783	291.565	22.2666	experimental
1607	he_27218	CUUCUUACUACUGCACUUGACUAGUCU	52	26	5817.59	69.0403	5104.41	84.9824	experimental
1608	he_47505	GCCUGGAUAGCUCAGUCGGUAGAGCAUCAG	52	27	16777.1	153.596	23149.3	303.803	experimental
1609	he_15624	CGGGAUGCCUGGGAGUUGCGAUCUGCCCG	52	28	386.87	20.6149	743.111	47.6724	experimental
1610	he_11181	CAUGGUGAGGAUGGGGUCGGAGG	52	29	6865.94	137.302	10111.6	272.666	experimental
1611	he_25747	GAGAAAGCUCACAAGAACUGCUAACU	52	30	13944.9	104.917	7873.5	172.213	experimental
1612	Ctr02-2M10		52	31	123.944	4.5258	29.6019	1.69628	control	control_spike-calibration	LC Internal Use
1613	Ctr03-2P		53	1	112.074	8.7837	30.7963	2.53852	control	control_spike-calibration	LC Internal Use
1614	xbz_11894	UGAAUGAUUAAAGGUCUUGGGGC	53	2	1604.8	38.0818	5281.34	145.08	experimental
1615	xbz_16514	AGCAGCAUUGUACAGGGCUAUC	53	3	722.63	31.4145	1332.17	63.3274	experimental
1616	xbz_5186	AGGAAGGCAGCAGGCGC	53	4	5698.37	71.7473	7279.9	116.29	experimental
1617	he_50188	UAGCUUGUCAGAUUAAUGUUGAUA	53	5	115.833	4.57645	34.5926	2.04637	experimental
1618	he_27706	GGGGGUAUAGCUCAGGUGGUAGAGCAUUUG	53	6	27759.7	439.669	24388.1	225.349	experimental
1619	he_47509	UCUCUAUUUGAACCAGAUAGGACUUUUG	53	7	117.407	4.41966	39.9259	1.9465	experimental
1620	he_15724	GGCUCGUUGGUCUAGGGGUAUGAUCCU	53	8	28411.6	306.103	40337.2	449.831	experimental
1621	he_5221	CUGGCUUUUUACCGGAAAGCCCC	53	9	410.944	19.7166	67.4537	8.5088	experimental
1622	he_25668	CACUGAAAAUGUUUAGACGGGCU	53	10	21145.5	214.363	38113.6	520.419	experimental
1623	Ctr03-2P		53	11	101.185	5.50641	35.7963	2.6254	control	control_spike-calibration	LC Internal Use
1624	xbz_11894	UGAAUGAUUAAAGGUCUUGGGGC	53	12	1426.78	64.5275	5750.93	254.87	experimental
1625	xbz_16514	AGCAGCAUUGUACAGGGCUAUC	53	13	696.593	38.5899	1504.61	74.005	experimental
1626	xbz_5186	AGGAAGGCAGCAGGCGC	53	14	4922.95	133.851	7561.94	146.315	experimental
1627	he_50188	UAGCUUGUCAGAUUAAUGUUGAUA	53	15	102.648	6.02691	34.8519	1.16663	experimental
1628	he_27706	GGGGGUAUAGCUCAGGUGGUAGAGCAUUUG	53	16	24670.9	403.46	24457.5	270.313	experimental
1629	he_47509	UCUCUAUUUGAACCAGAUAGGACUUUUG	53	17	108.63	7.42261	39.5185	1.9693	experimental
1630	he_15724	GGCUCGUUGGUCUAGGGGUAUGAUCCU	53	18	28165.4	396.989	39416.3	224.148	experimental
1631	he_5221	CUGGCUUUUUACCGGAAAGCCCC	53	19	376.454	38.7572	59.7778	8.62872	experimental
1632	he_25668	CACUGAAAAUGUUUAGACGGGCU	53	20	20620.2	144.577	35138.1	488.505	experimental
1633	Ctr03-2P		53	21	100.398	4.15571	33.3611	1.62606	control	control_spike-calibration	LC Internal Use
1634	xbz_11894	UGAAUGAUUAAAGGUCUUGGGGC	53	22	1560.92	41.3786	5502.74	275.488	experimental
1635	xbz_16514	AGCAGCAUUGUACAGGGCUAUC	53	23	718.648	30.5551	1395.27	66.5502	experimental
1636	xbz_5186	AGGAAGGCAGCAGGCGC	53	24	5404.9	72.6264	6975.19	162.094	experimental
1637	he_50188	UAGCUUGUCAGAUUAAUGUUGAUA	53	25	116.88	7.66923	35.8056	2.89524	experimental
1638	he_27706	GGGGGUAUAGCUCAGGUGGUAGAGCAUUUG	53	26	29437.5	234.968	24686.5	366.75	experimental
1639	he_47509	UCUCUAUUUGAACCAGAUAGGACUUUUG	53	27	126.398	8.28797	40.6204	2.96307	experimental
1640	he_15724	GGCUCGUUGGUCUAGGGGUAUGAUCCU	53	28	32782.1	241.925	43640.1	833.595	experimental
1641	he_5221	CUGGCUUUUUACCGGAAAGCCCC	53	29	486.917	25.7621	70.5185	7.22079	experimental
1642	he_25668	CACUGAAAAUGUUUAGACGGGCU	53	30	27087.1	323.925	43230.1	499.857	experimental
1643	Ctr03-2P		53	31	125.722	6.9428	33.4537	2.13727	control	control_spike-calibration	LC Internal Use
1644	Ctr03-2M05		54	1	107.991	7.17667	29.3981	2.0911	control	control_spike-calibration	LC Internal Use
1645	xbz_5371	UGGGUCUUUGCGGGCGAGAUGA	54	2	172.463	11.7779	89.7778	12.0321	experimental
1646	xbz_29478	CAGCAGCAAUUCAUGUUUUGA	54	3	108.889	4.99969	29.3148	1.74896	experimental
1647	xbz_7657	UUCUCUGGCGCAAUGGAUAGC	54	4	122.167	6.4337	33.3889	2.49797	experimental
1648	he_48741	AGUUGGUUACAGCUUGGUGU	54	5	137.343	8.97261	33.8148	2.2924	experimental
1649	he_27831	AGCUGUGAUGCCCACCUGUUUACCUGAGA	54	6	139.731	7.74549	60.7593	6.06949	experimental
1650	he_47514	ACCGGGAUGGCCGAGUGGUUAAGGCGUUGG	54	7	5306.04	64.7728	4452.69	106.265	experimental
1651	he_16347	AAAUAUGAUGAGUGUACAAAAUCUUGAUU	54	8	111.315	6.56477	60.9352	7.51605	experimental
1652	he_11662	UUCAGGUCCCUGUUGGGCUCCA	54	9	115.278	6.43709	34.787	3.15058	experimental
1653	he_25728	ACUCUUUUAGUAUAAAUAGUACCGUU	54	10	7938.84	297.258	212.454	25.3777	experimental
1654	Ctr03-2M05		54	11	104.315	5.93996	32.3148	2.30663	control	control_spike-calibration	LC Internal Use
1655	xbz_5371	UGGGUCUUUGCGGGCGAGAUGA	54	12	157.269	11.8823	89.0833	7.76419	experimental
1656	xbz_29478	CAGCAGCAAUUCAUGUUUUGA	54	13	101.944	7.45934	33.4907	3.08598	experimental
1657	xbz_7657	UUCUCUGGCGCAAUGGAUAGC	54	14	104.546	8.21713	33.3426	3.18631	experimental
1658	he_48741	AGUUGGUUACAGCUUGGUGU	54	15	113.157	13.8079	34.9167	4.50985	experimental
1659	he_27831	AGCUGUGAUGCCCACCUGUUUACCUGAGA	54	16	129.787	9.13661	54.1389	5.33453	experimental
1660	he_47514	ACCGGGAUGGCCGAGUGGUUAAGGCGUUGG	54	17	4941.56	127.665	4230.1	96.5802	experimental
1661	he_16347	AAAUAUGAUGAGUGUACAAAAUCUUGAUU	54	18	111.546	4.83829	61.8611	9.80221	experimental
1662	he_11662	UUCAGGUCCCUGUUGGGCUCCA	54	19	105.787	9.76744	33.0833	2.40764	experimental
1663	he_25728	ACUCUUUUAGUAUAAAUAGUACCGUU	54	20	8334.68	217.055	214.852	19.8917	experimental
1664	Ctr03-2M05		54	21	101.685	7.0122	28.8241	1.93264	control	control_spike-calibration	LC Internal Use
1665	xbz_5371	UGGGUCUUUGCGGGCGAGAUGA	54	22	151.25	12.8493	82.8981	12.4585	experimental
1666	xbz_29478	CAGCAGCAAUUCAUGUUUUGA	54	23	105.5	5.65768	30.3426	1.96303	experimental
1667	xbz_7657	UUCUCUGGCGCAAUGGAUAGC	54	24	117.528	7.97597	37.6111	2.63277	experimental
1668	he_48741	AGUUGGUUACAGCUUGGUGU	54	25	135.574	11.3238	36.2963	2.38476	experimental
1669	he_27831	AGCUGUGAUGCCCACCUGUUUACCUGAGA	54	26	154.296	11.3436	59.5926	4.69447	experimental
1670	he_47514	ACCGGGAUGGCCGAGUGGUUAAGGCGUUGG	54	27	5956.26	69.1802	4246.9	107.894	experimental
1671	he_16347	AAAUAUGAUGAGUGUACAAAAUCUUGAUU	54	28	131.704	6.87439	62.9444	6.54079	experimental
1672	he_11662	UUCAGGUCCCUGUUGGGCUCCA	54	29	123.324	6.12918	33.3056	2.71878	experimental
1673	he_25728	ACUCUUUUAGUAUAAAUAGUACCGUU	54	30	11436.9	273.634	253.028	27.4745	experimental
1674	Ctr03-2M05		54	31	121.935	5.98639	29.9722	1.7902	control	control_spike-calibration	LC Internal Use
1675	Ctr03-2M10		55	1	112.741	8.12331	28.8704	1.63543	control	control_spike-calibration	LC Internal Use
1676	xbz_4627	UUUGUUGCCAUUGCAGGAU	55	2	110.074	5.60824	31.6111	2.10399	experimental
1677	xbz_20113	CAGCAGCACACUGUGGUUUGU	55	3	109.213	5.9798	33.1944	1.96444	experimental
1678	xbz_630	UCUUCUCUGUUUUGGCCAUGU	55	4	109.843	6.6658	31.4537	2.21458	experimental
1679	he_36383	UAACAGUCUACAGCCAUGGUCGC	55	5	375.389	22.7715	331.435	23.36	experimental
1680	he_28329	CUCUGUGGCGCAAUGGACGAGCGCGCUG	55	6	221.815	17.3179	94.1667	7.88646	experimental
1681	he_47519	GGCCCCAUGGUGUAAUGGUCAGCACUCUG	55	7	21602.5	240.452	26404.2	588.857	experimental
1682	he_16349	GCAAAUGAUGAUAAACUGGAUCUGACU	55	8	128.741	5.33962	2182.83	86.2837	experimental
1683	he_17291	GUUUCCCAGCCAACGCACCA	55	9	1776.48	64.3709	2347.25	85.3271	experimental
1684	he_25733	UGGUAUAUAGUUUAAACAAAACGAAUG	55	10	4134.07	310.218	281.296	30.8146	experimental
1685	Ctr03-2M10		55	11	105.685	5.28027	31.0833	2.20079	control	control_spike-calibration	LC Internal Use
1686	xbz_4627	UUUGUUGCCAUUGCAGGAU	55	12	99.3704	5.71699	33.5556	1.80515	experimental
1687	xbz_20113	CAGCAGCACACUGUGGUUUGU	55	13	104.12	5.09667	36.1204	1.72782	experimental
1688	xbz_630	UCUUCUCUGUUUUGGCCAUGU	55	14	97.8611	6.76917	31.6296	2.3064	experimental
1689	he_36383	UAACAGUCUACAGCCAUGGUCGC	55	15	314.13	30.5513	299.63	11.3299	experimental
1690	he_28329	CUCUGUGGCGCAAUGGACGAGCGCGCUG	55	16	194.556	12.4947	88.3426	10.5025	experimental
1691	he_47519	GGCCCCAUGGUGUAAUGGUCAGCACUCUG	55	17	19836.6	261.361	26173.7	331.55	experimental
1692	he_16349	GCAAAUGAUGAUAAACUGGAUCUGACU	55	18	123.806	8.81	2126.73	103.664	experimental
1693	he_17291	GUUUCCCAGCCAACGCACCA	55	19	1678.03	72.1462	2225.31	57.1389	experimental
1694	he_25733	UGGUAUAUAGUUUAAACAAAACGAAUG	55	20	4637.33	330.999	302.676	26.4101	experimental
1695	Ctr03-2M10		55	21	102.62	6.04457	30.1111	2.16313	control	control_spike-calibration	LC Internal Use
1696	xbz_4627	UUUGUUGCCAUUGCAGGAU	55	22	100.87	7.54066	29.2593	2.4356	experimental
1697	xbz_20113	CAGCAGCACACUGUGGUUUGU	55	23	111.546	5.07216	35.1667	2.93066	experimental
1698	xbz_630	UCUUCUCUGUUUUGGCCAUGU	55	24	111.963	6.32888	32.8611	2.16798	experimental
1699	he_36383	UAACAGUCUACAGCCAUGGUCGC	55	25	369.231	21.6797	299.667	20.6751	experimental
1700	he_28329	CUCUGUGGCGCAAUGGACGAGCGCGCUG	55	26	252.352	16.9691	83.7778	8.02488	experimental
1701	he_47519	GGCCCCAUGGUGUAAUGGUCAGCACUCUG	55	27	23747.7	183.609	27392.5	385.157	experimental
1702	he_16349	GCAAAUGAUGAUAAACUGGAUCUGACU	55	28	143.815	9.45244	2192.25	74.1657	experimental
1703	he_17291	GUUUCCCAGCCAACGCACCA	55	29	2172.44	63.2957	2567.24	135.72	experimental
1704	he_25733	UGGUAUAUAGUUUAAACAAAACGAAUG	55	30	6609.03	300.109	371.991	41.3502	experimental
1705	Ctr03-2M10		55	31	124.611	6.04784	29.8704	1.75133	control	control_spike-calibration	LC Internal Use
1706	Ctr04-2P		56	1	112.796	5.7238	30.4352	2.12362	control	control_spike-calibration	LC Internal Use
1707	xbz_5349	AGCUCGGUCUGAGGCCCCUCAGU	56	2	279.778	16.889	156.5	23.5965	experimental
1708	xbz_21465	UUGCAGCUGCCUGGGAGUGACU	56	3	130.991	7.61515	49.3148	4.17077	experimental
1709	xbz_13754	UGAGGUAGUAGAUUGUAUAGUUG	56	4	5954.55	60.5411	17849.7	233.382	experimental
1710	he_49811	UUUGGCACUAGCACAUUUUUGCU	56	5	121.759	10.5696	39.8889	4.60259	experimental
1711	he_28378	GCGUUGGUGGUAUAGUGGUGAGCAUAGUUG	56	6	36339.3	376.82	26724.9	409.611	experimental
1712	he_47535	GGCUCUGUGGCUUAGUUGGCUAAAGCGCCU	56	7	3126.06	98.8047	1662.46	63.7931	experimental
1713	he_16687	AAAUUUUUAAGGUGGUAGUAUAAAUGG	56	8	127.602	7.69505	38.4259	2.81585	experimental
1714	he_5403	AGUUGGUUAGAGCGUGGUGCUG	56	9	239.185	12.094	74.5185	7.83651	experimental
1715	xbz_14049	AUGUUUAGACGGGCUCAC	56	10	15720	146.382	27161.3	272.575	experimental
1716	Ctr04-2P		56	11	105.787	5.69153	35.1852	2.76881	control	control_spike-calibration	LC Internal Use
1717	xbz_5349	AGCUCGGUCUGAGGCCCCUCAGU	56	12	255.472	14.381	181.019	32.6625	experimental
1718	xbz_21465	UUGCAGCUGCCUGGGAGUGACU	56	13	122.509	8.80685	61.6759	9.84822	experimental
1719	xbz_13754	UGAGGUAGUAGAUUGUAUAGUUG	56	14	5165.59	101.323	18745.7	245.244	experimental
1720	he_49811	UUUGGCACUAGCACAUUUUUGCU	56	15	102.889	4.5802	35.1852	2.97387	experimental
1721	he_28378	GCGUUGGUGGUAUAGUGGUGAGCAUAGUUG	56	16	32362.3	287.493	27050.3	289.636	experimental
1722	he_47535	GGCUCUGUGGCUUAGUUGGCUAAAGCGCCU	56	17	2825.34	111.847	1485.68	85.7028	experimental
1723	he_16687	AAAUUUUUAAGGUGGUAGUAUAAAUGG	56	18	122.759	7.1406	36.8981	2.805	experimental
1724	he_5403	AGUUGGUUAGAGCGUGGUGCUG	56	19	223.935	18.9329	67.3148	8.51348	experimental
1725	xbz_14049	AUGUUUAGACGGGCUCAC	56	20	15516.6	171.794	25177.6	302.397	experimental
1726	Ctr04-2P		56	21	102.093	6.55607	32.1944	2.37769	control	control_spike-calibration	LC Internal Use
1727	xbz_5349	AGCUCGGUCUGAGGCCCCUCAGU	56	22	277.074	26.5526	164.657	24.4155	experimental
1728	xbz_21465	UUGCAGCUGCCUGGGAGUGACU	56	23	126.583	6.34392	56.0741	8.08795	experimental
1729	xbz_13754	UGAGGUAGUAGAUUGUAUAGUUG	56	24	5745.32	119.279	17479.6	238.776	experimental
1730	he_49811	UUUGGCACUAGCACAUUUUUGCU	56	25	119.444	9.98722	38.4815	3.14593	experimental
1731	he_28378	GCGUUGGUGGUAUAGUGGUGAGCAUAGUUG	56	26	38352.8	341.918	26567	419.431	experimental
1732	he_47535	GGCUCUGUGGCUUAGUUGGCUAAAGCGCCU	56	27	3453.79	94.1817	1567.96	80.5383	experimental
1733	he_16687	AAAUUUUUAAGGUGGUAGUAUAAAUGG	56	28	148.778	9.42093	37.7593	2.66816	experimental
1734	he_5403	AGUUGGUUAGAGCGUGGUGCUG	56	29	290.519	19.3746	76.1204	7.97978	experimental
1735	xbz_14049	AUGUUUAGACGGGCUCAC	56	30	20253.1	105.765	29862.2	261.011	experimental
1736	Ctr04-2P		56	31	130.389	6.04165	33.25	2.34471	control	control_spike-calibration	LC Internal Use
1737	Ctr04-2M05		57	1	110.972	4.93217	31.2685	1.90722	control	control_spike-calibration	LC Internal Use
1738	xbz_8656	AAGGUAGGGGAAUUUGU	57	2	371.269	27.6062	94.9815	11.5362	experimental
1739	xbz_20066	AAGCUGCCAGUUGAAGAACUGU	57	3	291.889	23.3263	245.843	29.9358	experimental
1740	xbz_2530	AGGCAGUGUAGUUAGCUGAUUGC	57	4	115.87	6.50965	35.7963	2.42556	experimental
1741	he_48830	UCCCUGUCCUCCAGGAGCUCACGU	57	5	143.046	8.54607	67.1296	11.0277	experimental
1742	he_28451	ACCCUGUGGUCUAGUGGUUAGGAGUUGG	57	6	35080	564.618	22036.2	262.727	experimental
1743	he_47544	GGGGGUGUAGCUCAGUGGUAGAGCGU	57	7	28405.5	186.564	26926.9	605.889	experimental
1744	he_16726	GGGGGUAUAGCUCAGUGGUUGAGCAUUUG	57	8	24207	244.683	23718.3	364.046	experimental
1745	he_10636	UCAACAAAAUCACUGAUGCUGGAG	57	9	127.426	9.46534	48.4722	5.54077	experimental
1746	xbz_14076	GUUAAGAUGGCAGAGCCCGGU	57	10	32615.1	252.046	15119.5	188.676	experimental
1747	Ctr04-2M05		57	11	106.491	6.01943	33.3241	1.40645	control	control_spike-calibration	LC Internal Use
1748	xbz_8656	AAGGUAGGGGAAUUUGU	57	12	334.426	16.3548	127.278	21.4057	experimental
1749	xbz_20066	AAGCUGCCAGUUGAAGAACUGU	57	13	259.87	6.90671	283.37	27.2059	experimental
1750	xbz_2530	AGGCAGUGUAGUUAGCUGAUUGC	57	14	102.417	7.37529	34.75	2.45378	experimental
1751	he_48830	UCCCUGUCCUCCAGGAGCUCACGU	57	15	124.093	8.775	59.287	5.84064	experimental
1752	he_28451	ACCCUGUGGUCUAGUGGUUAGGAGUUGG	57	16	31062	490.931	21883.9	366.029	experimental
1753	he_47544	GGGGGUGUAGCUCAGUGGUAGAGCGU	57	17	26106.6	440.569	26479.5	295.597	experimental
1754	he_16726	GGGGGUAUAGCUCAGUGGUUGAGCAUUUG	57	18	23760.8	241.636	22964.7	276.814	experimental
1755	he_10636	UCAACAAAAUCACUGAUGCUGGAG	57	19	111.667	10.1438	41.75	4.36666	experimental
1756	xbz_14076	GUUAAGAUGGCAGAGCCCGGU	57	20	31415.4	187.523	14042.3	144.61	experimental
1757	Ctr04-2M05		57	21	103.509	5.39036	32.6481	2.22271	control	control_spike-calibration	LC Internal Use
1758	xbz_8656	AAGGUAGGGGAAUUUGU	57	22	352.685	29.9097	110.019	17.3367	experimental
1759	xbz_20066	AAGCUGCCAGUUGAAGAACUGU	57	23	276.954	17.1123	251.481	18.6865	experimental
1760	xbz_2530	AGGCAGUGUAGUUAGCUGAUUGC	57	24	110.213	5.27921	34.3704	1.43124	experimental
1761	he_48830	UCCCUGUCCUCCAGGAGCUCACGU	57	25	145.528	8.83225	63.9537	6.28659	experimental
1762	he_28451	ACCCUGUGGUCUAGUGGUUAGGAGUUGG	57	26	37410.7	240.704	22136.3	261.997	experimental
1763	he_47544	GGGGGUGUAGCUCAGUGGUAGAGCGU	57	27	31440.4	297.452	28196.8	471.169	experimental
1764	he_16726	GGGGGUAUAGCUCAGUGGUUGAGCAUUUG	57	28	27877.5	165.349	25124	350.645	experimental
1765	he_10636	UCAACAAAAUCACUGAUGCUGGAG	57	29	138.12	8.09259	45.0463	4.05196	experimental
1766	xbz_14076	GUUAAGAUGGCAGAGCCCGGU	57	30	40972.3	347.482	16866.6	180.369	experimental
1767	Ctr04-2M05		57	31	127.463	6.11024	34.6296	2.88597	control	control_spike-calibration	LC Internal Use
1768	Ctr04-2M10		58	1	115.898	7.08023	31.1759	1.86872	control	control_spike-calibration	LC Internal Use
1769	xbz_4929	AGAUGUCCGGGACUGCACGCGCG	58	2	723.528	37.7596	586.657	34.0196	experimental
1770	xbz_29280	CUUAUCAGAUUGUAUUGUAAU	58	3	108.991	6.5217	30.3704	1.49512	experimental
1771	xbz_14512	AAUGGCGCCACUAGGGUUGU	58	4	136.991	7.29037	49.0278	5.40761	experimental
1772	he_38408	AGGGCUUAGCUGCUUGUGAGCA	58	5	164.241	6.93881	39.0833	2.33272	experimental
1773	he_28474	AUACAUGAUGAUCUCAAUCCAACUUG	58	6	298.88	16.3802	30288.1	272.414	experimental
1774	he_47546	GGGGGUGUAGCUCAGUGGUAGAGCACAUG	58	7	26727.9	302.32	26366.2	270.786	experimental
1775	he_17407	CACCAUGAUGGAACUGAGGAUCUGAGGAA	58	8	142.352	8.83209	359.111	25.1159	experimental
1776	he_23832	AAGCAAAUUAUAGAGAUGAUAA	58	9	112.324	6.61325	33.4907	2.63157	experimental
1777	xbz_14129	GAGAAAGCUCACAAGAACUG	58	10	9854.72	88.7748	3459.65	83.9368	experimental
1778	Ctr04-2M10		58	11	109.907	5.23742	32.9537	2.35766	control	control_spike-calibration	LC Internal Use
1779	xbz_4929	AGAUGUCCGGGACUGCACGCGCG	58	12	634.481	30.1852	647.306	36.0766	experimental
1780	xbz_29280	CUUAUCAGAUUGUAUUGUAAU	58	13	100.407	6.44029	32.3611	1.53744	experimental
1781	xbz_14512	AAUGGCGCCACUAGGGUUGU	58	14	122.917	6.63343	49.8889	4.84398	experimental
1782	he_38408	AGGGCUUAGCUGCUUGUGAGCA	58	15	134.704	10.2986	39.1204	2.65005	experimental
1783	he_28474	AUACAUGAUGAUCUCAAUCCAACUUG	58	16	255.259	14.4897	29752.5	340.53	experimental
1784	he_47546	GGGGGUGUAGCUCAGUGGUAGAGCACAUG	58	17	24635	402.173	26038.1	398.116	experimental
1785	he_17407	CACCAUGAUGGAACUGAGGAUCUGAGGAA	58	18	121.093	10.0611	344.204	35.2748	experimental
1786	he_23832	AAGCAAAUUAUAGAGAUGAUAA	58	19	97.8519	5.35438	32.8796	1.59273	experimental
1787	xbz_14129	GAGAAAGCUCACAAGAACUG	58	20	9634.91	94.8851	3280.77	145.726	experimental
1788	Ctr04-2M10		58	21	102.315	8.33935	32.1296	3.19489	control	control_spike-calibration	LC Internal Use
1789	xbz_4929	AGAUGUCCGGGACUGCACGCGCG	58	22	629.056	26.4973	574.213	30.0059	experimental
1790	xbz_29280	CUUAUCAGAUUGUAUUGUAAU	58	23	104.019	4.2492	32.1389	2.2484	experimental
1791	xbz_14512	AAUGGCGCCACUAGGGUUGU	58	24	131.972	5.45921	48.5463	4.23467	experimental
1792	he_38408	AGGGCUUAGCUGCUUGUGAGCA	58	25	173.704	11.3247	41.25	3.90333	experimental
1793	he_28474	AUACAUGAUGAUCUCAAUCCAACUUG	58	26	325.824	18.2633	29605.6	256.448	experimental
1794	he_47546	GGGGGUGUAGCUCAGUGGUAGAGCACAUG	58	27	29389.5	288.247	27462.5	359.558	experimental
1795	he_17407	CACCAUGAUGGAACUGAGGAUCUGAGGAA	58	28	151.62	11.2538	345.306	30.8134	experimental
1796	he_23832	AAGCAAAUUAUAGAGAUGAUAA	58	29	122.111	6.5984	32.0741	2.21593	experimental
1797	xbz_14129	GAGAAAGCUCACAAGAACUG	58	30	12590.7	127.633	3865.1	86.838	experimental
1798	Ctr04-2M10		58	31	124.139	6.53167	33.0463	3.01208	control	control_spike-calibration	LC Internal Use
1799	Ctr05-2P		59	1	114.833	4.7567	29.5	2.98751	control	control_spike-calibration	LC Internal Use
1800	xbz_8613	AGCUGGUGUUGUGAAUCAGGCCGU	59	2	187.954	13.7388	215.083	28.6425	experimental
1801	xbz_20067	AGUUCUUCAGUGGCAAGCUUUA	59	3	118.028	7.5782	35.8796	3.84445	experimental
1802	xbz_12703	UCAAGAGCAAUAACGAAAAAUG	59	4	124.981	7.47705	35.1759	2.88997	experimental
1803	he_48076	UGUAAACAUCCUCGACUGGAAGCU	59	5	726.009	26.3093	1615.46	69.8461	experimental
1804	he_28476	UACAAUGAUGAUAACAUAGUUCAGCAGA	59	6	227.417	13.8929	10583.8	233.563	experimental
1805	he_47550	GGGGGUAUAGCUCAGUGGUAGAGCGCGUG	59	7	25667.5	210.512	24791.8	154.384	experimental
1806	he_17423	AUAAAUGAUGAUCAGCAGAAUCUGAGU	59	8	115.602	7.66951	36.8056	3.51089	experimental
1807	he_22897	UUAGAUGACAUAAGCUCAGAA	59	9	119.741	7.48378	36.213	2.59061	experimental
1808	xbz_14130	ACAGCUAUCCAUUGGUCUU	59	10	7715.77	92.9006	4154.67	126.077	experimental
1809	Ctr05-2P		59	11	106.926	8.83674	32.0185	2.25057	control	control_spike-calibration	LC Internal Use
1810	xbz_8613	AGCUGGUGUUGUGAAUCAGGCCGU	59	12	176.954	7.92062	237.333	22.7156	experimental
1811	xbz_20067	AGUUCUUCAGUGGCAAGCUUUA	59	13	105.88	5.77574	41.4907	3.43836	experimental
1812	xbz_12703	UCAAGAGCAAUAACGAAAAAUG	59	14	104.528	5.61783	33.8148	1.94383	experimental
1813	he_48076	UGUAAACAUCCUCGACUGGAAGCU	59	15	623.287	38.0357	1582.58	104.279	experimental
1814	he_28476	UACAAUGAUGAUAACAUAGUUCAGCAGA	59	16	191.611	9.48273	10290.3	347.142	experimental
1815	he_47550	GGGGGUAUAGCUCAGUGGUAGAGCGCGUG	59	17	23990.7	414.519	23998.3	391.564	experimental
1816	he_17423	AUAAAUGAUGAUCAGCAGAAUCUGAGU	59	18	110.731	6.36228	37.3241	2.14358	experimental
1817	he_22897	UUAGAUGACAUAAGCUCAGAA	59	19	104.306	7.13614	34.2037	2.43326	experimental
1818	xbz_14130	ACAGCUAUCCAUUGGUCUU	59	20	7520.29	80.3762	3981.32	139.57	experimental
1819	Ctr05-2P		59	21	104.481	5.78345	29.8333	1.9551	control	control_spike-calibration	LC Internal Use
1820	xbz_8613	AGCUGGUGUUGUGAAUCAGGCCGU	59	22	181.222	9.27798	223.991	18.6069	experimental
1821	xbz_20067	AGUUCUUCAGUGGCAAGCUUUA	59	23	110.102	6.53093	40.3519	3.28496	experimental
1822	xbz_12703	UCAAGAGCAAUAACGAAAAAUG	59	24	121.546	5.9364	37.1667	2.95607	experimental
1823	he_48076	UGUAAACAUCCUCGACUGGAAGCU	59	25	719.861	38.1601	1565.13	73.8526	experimental
1824	he_28476	UACAAUGAUGAUAACAUAGUUCAGCAGA	59	26	243.352	9.04952	9850.17	145.929	experimental
1825	he_47550	GGGGGUAUAGCUCAGUGGUAGAGCGCGUG	59	27	28602.1	224.208	25379.7	317.311	experimental
1826	he_17423	AUAAAUGAUGAUCAGCAGAAUCUGAGU	59	28	127.241	7.634	36.3333	2.93226	experimental
1827	he_22897	UUAGAUGACAUAAGCUCAGAA	59	29	132.157	5.74727	35.287	2.49879	experimental
1828	xbz_14130	ACAGCUAUCCAUUGGUCUU	59	30	9670.38	110.199	4598.43	152.228	experimental
1829	Ctr05-2P		59	31	124.194	6.96649	31.3148	2.37844	control	control_spike-calibration	LC Internal Use
1830	Ctr05-2M05		60	1	104.843	6.20696	29.5833	2.59087	control	control_spike-calibration	LC Internal Use
1831	xbz_11341	AUAGGUAUUAAGGUUUU	60	2	101.509	7.43507	28.463	1.66563	experimental
1832	xbz_28567	UAGUUAUCAGACUGAUGUUUAA	60	3	108.343	6.47809	30.4815	2.5004	experimental
1833	xbz_8337	GUGAGGUAGUAGGUUGUAUAGU	60	4	7728.99	104.123	22456.5	251.005	experimental
1834	he_33594	UAGCAGCACAUAAUGGUUUGU	60	5	158.833	11.0432	374.778	35.0325	experimental
1835	he_28479	UGUUAGUGAUGAUUUUAAAAUUAAAG	60	6	121.093	10.8942	46.7407	7.48503	experimental
1836	he_47551	GCCGAGAUAGCUCAGUUGGGAGAGCGUUAG	60	7	9856.83	134.998	16129.4	215.126	experimental
1837	he_17441	CUGAAAUGAAGAGAAUACUCAUUGCUGAUC	60	8	132.519	8.08885	2548.44	78.611	experimental
1838	he_24741	AAAGGAAUUUUGAAGAGAGAGUU	60	9	108.296	5.99417	35.5926	2.36816	experimental
1839	xbz_14109	ACAACAUUCAAAAAAGAGUAAUA	60	10	109.444	7.36541	33.1296	2.85831	experimental
1840	Ctr05-2M05		60	11	101.472	3.7428	30.963	2.27512	control	control_spike-calibration	LC Internal Use
1841	xbz_11341	AUAGGUAUUAAGGUUUU	60	12	97.0185	5.09165	31.037	1.36667	experimental
1842	xbz_28567	UAGUUAUCAGACUGAUGUUUAA	60	13	94.537	5.50688	33.25	3.36036	experimental
1843	xbz_8337	GUGAGGUAGUAGGUUGUAUAGU	60	14	6645.41	138.392	24752.4	349.877	experimental
1844	he_33594	UAGCAGCACAUAAUGGUUUGU	60	15	147.722	12.0263	370.639	41.4885	experimental
1845	he_28479	UGUUAGUGAUGAUUUUAAAAUUAAAG	60	16	103.981	7.71814	48.287	5.63376	experimental
1846	he_47551	GCCGAGAUAGCUCAGUUGGGAGAGCGUUAG	60	17	9120.51	96.8208	15677.1	311.8	experimental
1847	he_17441	CUGAAAUGAAGAGAAUACUCAUUGCUGAUC	60	18	128.694	9.39124	2482.81	91.5446	experimental
1848	he_24741	AAAGGAAUUUUGAAGAGAGAGUU	60	19	99.3611	6.80085	32.5741	2.66582	experimental
1849	xbz_14109	ACAACAUUCAAAAAAGAGUAAUA	60	20	95.6389	7.27749	29.9352	2.30511	experimental
1850	Ctr05-2M05		60	21	96.8148	5.8071	29.1944	2.26496	control	control_spike-calibration	LC Internal Use
1851	xbz_11341	AUAGGUAUUAAGGUUUU	60	22	90.8148	6.4506	27.6296	3.03436	experimental
1852	xbz_28567	UAGUUAUCAGACUGAUGUUUAA	60	23	99.9074	9.64272	29.8981	2.4796	experimental
1853	xbz_8337	GUGAGGUAGUAGGUUGUAUAGU	60	24	7352.94	84.0743	22417.7	189.95	experimental
1854	he_33594	UAGCAGCACAUAAUGGUUUGU	60	25	161.056	12.2572	353.157	35.4127	experimental
1855	he_28479	UGUUAGUGAUGAUUUUAAAAUUAAAG	60	26	122.009	7.06379	44.537	3.68991	experimental
1856	he_47551	GCCGAGAUAGCUCAGUUGGGAGAGCGUUAG	60	27	11008.8	149.076	16051.4	223.347	experimental
1857	he_17441	CUGAAAUGAAGAGAAUACUCAUUGCUGAUC	60	28	158.741	12.247	2490.43	66.8524	experimental
1858	he_24741	AAAGGAAUUUUGAAGAGAGAGUU	60	29	125.954	6.51007	32.0926	2.8565	experimental
1859	xbz_14109	ACAACAUUCAAAAAAGAGUAAUA	60	30	125.074	6.63001	31.25	1.7515	experimental
1860	Ctr05-2M05		60	31	122.306	4.43954	29.213	3.01414	control	control_spike-calibration	LC Internal Use
1861	Ctr05-2M10		61	1	118.065	14.6997	31.6481	2.89154	control	control_spike-calibration	LC Internal Use
1862	xbz_5348	UGAGGGGCAGAGAGCGAGACUUU	61	2	904.222	70.4316	742.759	53.8943	experimental
1863	xbz_19721	AACCAGGCGGAAACACCAAA	61	3	587.056	36.1008	159.889	18.7204	experimental
1864	xbz_7517	UUCAAGUAAUUCAGGAUAGGUU	61	4	427.62	26.3069	1646.37	73.1586	experimental
1865	he_53033	ACCUGGCAUACAAUGUAGAUUUCU	61	5	189.019	13.8914	78.6111	10.2864	experimental
1866	he_28480	UGAGCAUGUAGACAAAGGUAACACUGAAG	61	6	304.204	14.1387	10694.3	172.776	experimental
1867	he_47552	GGGGGUAUAGCUCAGCGGUAGAGCGCG	61	7	27990	240.305	24083.6	281.087	experimental
1868	he_18129	UUAGUUUUACCCUACUGAUGAUCUGUUG	61	8	219.991	15.9306	954.231	80.6363	experimental
1869	he_23198	UAGCACAUGAAAUCAGUUAA	61	9	107.722	8.36976	33.2222	2.21859	experimental
1870	xbz_14070	CAGAACCCAACCUCCGAGCAGUA	61	10	498.185	22.916	210.583	16.3622	experimental
1871	Ctr05-2M10		61	11	113.176	5.94653	37.6944	4.07972	control	control_spike-calibration	LC Internal Use
1872	xbz_5348	UGAGGGGCAGAGAGCGAGACUUU	61	12	804.065	55.522	845.991	40.8676	experimental
1873	xbz_19721	AACCAGGCGGAAACACCAAA	61	13	567.648	28.432	181.093	15.4621	experimental
1874	xbz_7517	UUCAAGUAAUUCAGGAUAGGUU	61	14	407	29.3375	1792.09	116.592	experimental
1875	he_53033	ACCUGGCAUACAAUGUAGAUUUCU	61	15	165.759	8.63796	76.0556	9.15274	experimental
1876	he_28480	UGAGCAUGUAGACAAAGGUAACACUGAAG	61	16	293.454	17.8296	10489.8	225.815	experimental
1877	he_47552	GGGGGUAUAGCUCAGCGGUAGAGCGCG	61	17	25929.2	390.818	23624	223.561	experimental
1878	he_18129	UUAGUUUUACCCUACUGAUGAUCUGUUG	61	18	205.731	24.1555	975.352	97.1028	experimental
1879	he_23198	UAGCACAUGAAAUCAGUUAA	61	19	97.5833	5.44836	32.213	3.30406	experimental
1880	xbz_14070	CAGAACCCAACCUCCGAGCAGUA	61	20	482.796	36.085	169.833	28.0958	experimental
1881	Ctr05-2M10		61	21	106.685	9.45491	33.5926	3.76912	control	control_spike-calibration	LC Internal Use
1882	xbz_5348	UGAGGGGCAGAGAGCGAGACUUU	61	22	787.25	40.9468	742.907	57.8481	experimental
1883	xbz_19721	AACCAGGCGGAAACACCAAA	61	23	586.741	33.8831	183.917	24.9703	experimental
1884	xbz_7517	UUCAAGUAAUUCAGGAUAGGUU	61	24	452.167	24.2816	1618.61	124.114	experimental
1885	he_53033	ACCUGGCAUACAAUGUAGAUUUCU	61	25	184.833	10.8804	86.6667	11.6963	experimental
1886	he_28480	UGAGCAUGUAGACAAAGGUAACACUGAAG	61	26	358.046	28.1373	10063.8	223.037	experimental
1887	he_47552	GGGGGUAUAGCUCAGCGGUAGAGCGCG	61	27	30925.3	278.331	25082.9	326.904	experimental
1888	he_18129	UUAGUUUUACCCUACUGAUGAUCUGUUG	61	28	290.926	20.2432	1045.72	68.7698	experimental
1889	he_23198	UAGCACAUGAAAUCAGUUAA	61	29	117.704	7.40328	30.7778	2.50358	experimental
1890	xbz_14070	CAGAACCCAACCUCCGAGCAGUA	61	30	630.065	33.0362	207.907	20.9291	experimental
1891	Ctr05-2M10		61	31	131.843	7.70018	35.4352	2.73186	control	control_spike-calibration	LC Internal Use
1892	Ctr06-2P		62	1	132.676	8.11118	50.463	4.41837	control	control_spike-calibration	LC Internal Use
1893	xbz_2650	GAGGGGGCGGGCUCCGGCG	62	2	8854.02	119.059	9118.24	304.415	experimental
1894	xbz_22723	AGUUGGGAGAGCAUCG	62	3	3988.09	147.697	6615.06	211.81	experimental
1895	xbz_6475	UGAGGUAGGAGGUUGUAUAGUU	62	4	3668.09	92.6774	10464	406.876	experimental
1896	he_17478	CACUAGAUUGUGAGCUCCUGGA	62	5	195.907	11.1494	111.222	16.8131	experimental
1897	he_28482	CCUGGAUGAUGAUAAGCAAAUGCUGACU	62	6	244.861	13.8162	16467.2	167.472	experimental
1898	he_47554	GGGGGUAUAGCUCAGUGGUAGAGAGUG	62	7	26023.1	329.74	24510.9	222.117	experimental
1899	he_18225	UCCCUGGUGGUCUAGUGGUUAGGAUUCAGU	62	8	36650.5	492.111	24581.9	211.805	experimental
1900	he_5721	GUGAAUGAUGAGUAUUGACA	62	9	109.231	8.26501	36.3981	3.64022	experimental
1901	xbz_14050	CACCACGAUCAAAAGGGACA	62	10	392.407	14.2698	112.833	7.16886	experimental
1902	Ctr06-2P		62	11	127.954	8.22509	62.3611	6.04262	control	control_spike-calibration	LC Internal Use
1903	xbz_2650	GAGGGGGCGGGCUCCGGCG	62	12	7572.19	222.63	9910.91	238.813	experimental
1904	xbz_22723	AGUUGGGAGAGCAUCG	62	13	3633.12	108.781	7435.93	212.341	experimental
1905	xbz_6475	UGAGGUAGGAGGUUGUAUAGUU	62	14	3255.39	97.1371	11551.4	460.757	experimental
1906	he_17478	CACUAGAUUGUGAGCUCCUGGA	62	15	168.361	13.5008	117.25	14.593	experimental
1907	he_28482	CCUGGAUGAUGAUAAGCAAAUGCUGACU	62	16	227.509	16.0993	15986.2	141.318	experimental
1908	he_47554	GGGGGUAUAGCUCAGUGGUAGAGAGUG	62	17	23875.4	299.451	24347.5	352.373	experimental
1909	he_18225	UCCCUGGUGGUCUAGUGGUUAGGAUUCAGU	62	18	36254.4	337.018	23799.3	375.268	experimental
1910	he_5721	GUGAAUGAUGAGUAUUGACA	62	19	94.6852	7.69348	33.2685	2.59981	experimental
1911	xbz_14050	CACCACGAUCAAAAGGGACA	62	20	381.731	30.601	90.8241	13.4017	experimental
1912	Ctr06-2P		62	21	114.056	9.26135	52.0833	6.81961	control	control_spike-calibration	LC Internal Use
1913	xbz_2650	GAGGGGGCGGGCUCCGGCG	62	22	7934.68	138.893	8945.57	229.792	experimental
1914	xbz_22723	AGUUGGGAGAGCAUCG	62	23	3933.14	84.6299	6906.26	248.831	experimental
1915	xbz_6475	UGAGGUAGGAGGUUGUAUAGUU	62	24	3655.44	141.259	10626.9	336.113	experimental
1916	he_17478	CACUAGAUUGUGAGCUCCUGGA	62	25	197.296	12.1026	104.352	10.1072	experimental
1917	he_28482	CCUGGAUGAUGAUAAGCAAAUGCUGACU	62	26	254.731	17.174	15682.2	306.39	experimental
1918	he_47554	GGGGGUAUAGCUCAGUGGUAGAGAGUG	62	27	28509.7	248.75	25442.6	406.085	experimental
1919	he_18225	UCCCUGGUGGUCUAGUGGUUAGGAUUCAGU	62	28	42347.6	224.992	26361.4	396.794	experimental
1920	he_5721	GUGAAUGAUGAGUAUUGACA	62	29	119.546	7.77172	31.7222	1.7817	experimental
1921	xbz_14050	CACCACGAUCAAAAGGGACA	62	30	480.63	28.5148	121.25	13.6978	experimental
1922	Ctr06-2P		62	31	155.694	12.8051	67.7593	8.78175	control	control_spike-calibration	LC Internal Use
1923	Ctr06-2M05		63	1	111.417	7.87534	30.1759	2.70972	control	control_spike-calibration	LC Internal Use
1924	xbz_12	UAAUACUGCCUGGUAAUGAUGAC	63	2	113.787	11.2441	33.6944	2.62788	experimental
1925	xbz_29277	CUUAGCAGGUUGUAUUAUCA	63	3	109.398	7.31014	31.0741	1.55102	experimental
1926	xbz_19	GAGGCUGAAGAGGACGC	63	4	45343	402.303	14260.1	310.663	experimental
1927	he_22761	GAGCUUAUUCAUAAAAGUGCAG	63	5	127.815	8.18609	35.5093	3.26263	experimental
1928	he_28483	AAUCAUGAAGAGAUGUACUAUCUGUCUGA	63	6	121.731	6.84489	155.963	19.4215	experimental
1929	he_47558	GGGGGGUGUAGCUCAGUGGUAGAGCGCG	63	7	29092.4	355.605	27014.5	236.492	experimental
1930	he_18278	CCUUGGUGGUCUAGUGGUUAGGAUUCGG	63	8	37435.1	524.476	24844	180.404	experimental
1931	he_7061	UAAGAGGAUUAGAUACCCUGGU	63	9	129.259	6.39125	37.1852	2.54363	experimental
1932	xbz_14154	UCAUGGGGAAGCAGAUUUG	63	10	1601.63	67.826	1887.87	96.9201	experimental
1933	Ctr06-2M05		63	11	105.065	4.41805	32.6852	2.35474	control	control_spike-calibration	LC Internal Use
1934	xbz_12	UAAUACUGCCUGGUAAUGAUGAC	63	12	110.87	5.13389	40.6111	4.1779	experimental
1935	xbz_29277	CUUAGCAGGUUGUAUUAUCA	63	13	103.204	6.64277	33.6389	2.69461	experimental
1936	xbz_19	GAGGCUGAAGAGGACGC	63	14	39085.3	337.54	15162.6	398.497	experimental
1937	he_22761	GAGCUUAUUCAUAAAAGUGCAG	63	15	109.426	6.40707	37.1111	2.83613	experimental
1938	he_28483	AAUCAUGAAGAGAUGUACUAUCUGUCUGA	63	16	117.556	9.30313	136.806	12.2707	experimental
1939	he_47558	GGGGGGUGUAGCUCAGUGGUAGAGCGCG	63	17	26600.2	398.716	26329.7	458.089	experimental
1940	he_18278	CCUUGGUGGUCUAGUGGUUAGGAUUCGG	63	18	37016	335.155	23488.4	399.948	experimental
1941	he_7061	UAAGAGGAUUAGAUACCCUGGU	63	19	115.139	7.3643	37.3148	3.84914	experimental
1942	xbz_14154	UCAUGGGGAAGCAGAUUUG	63	20	1543.53	54.4336	1678.22	60.8833	experimental
1943	Ctr06-2M05		63	21	105.444	9.82685	29.9167	3.08183	control	control_spike-calibration	LC Internal Use
1944	xbz_12	UAAUACUGCCUGGUAAUGAUGAC	63	22	104.806	11.319	36.2037	3.70087	experimental
1945	xbz_29277	CUUAGCAGGUUGUAUUAUCA	63	23	100.241	11.9296	29.213	3.05419	experimental
1946	xbz_19	GAGGCUGAAGAGGACGC	63	24	43341.7	259.854	14146.6	238.373	experimental
1947	he_22761	GAGCUUAUUCAUAAAAGUGCAG	63	25	122.981	6.95645	36.8796	4.2155	experimental
1948	he_28483	AAUCAUGAAGAGAUGUACUAUCUGUCUGA	63	26	127.398	7.3611	145.13	16.2654	experimental
1949	he_47558	GGGGGGUGUAGCUCAGUGGUAGAGCGCG	63	27	31904.3	337.056	28189	485.627	experimental
1950	he_18278	CCUUGGUGGUCUAGUGGUUAGGAUUCGG	63	28	43721.1	380.758	26423.5	393.647	experimental
1951	he_7061	UAAGAGGAUUAGAUACCCUGGU	63	29	145.065	12.872	42.2778	3.80318	experimental
1952	xbz_14154	UCAUGGGGAAGCAGAUUUG	63	30	2063.14	71.7681	2059.39	89.8949	experimental
1953	Ctr06-2M05		63	31	128.62	5.77574	31.7963	3.09585	control	control_spike-calibration	LC Internal Use
1954	Ctr06-2M10		64	1	111.611	5.57671	28.8704	2.88759	control	control_spike-calibration	LC Internal Use
1955	xbz_14635	UCAGAGUUGACGAUC	64	2	104.204	8.05096	30.5185	2.13332	experimental
1956	xbz_27389	UGAAUUACCGAAGGGCCAU	64	3	108.602	6.16432	30.287	2.81203	experimental
1957	xbz_3732	ACUGCAGUGAAGGCACUUGUAG	64	4	112.093	5.18181	38.4907	3.29115	experimental
1958	he_6832	ACUGCAGUGAAGGCACUUGUAG	64	5	121.593	8.73604	40.9259	5.52768	experimental
1959	he_28713	AACAUUCAACGCUGUCGGUGAGUUUGGA	64	6	424.593	24.0238	800.324	52.6343	experimental
1960	he_47874	GUGCAGUGGUAUAGUGGUGAGCAUAGCU	64	7	36684.8	325.45	26366.5	419.581	experimental
1961	he_18955	GAAAAUGAUGAAUUCUGGGGCGCUGAUU	64	8	137.157	10.1651	136.074	15.9225	experimental
1962	he_1916	UAGUACUGUGCAUAUCAUCUAU	64	9	100.093	3.26275	30.7685	1.74873	experimental
1963	TU105	AAAUUGGCUGACUCUAACCAUUGUCAAGCUUA	64	10	99.1019	5.85644	31.7037	2.36509	experimental
1964	Ctr06-2M10		64	11	103.667	7.90717	33.5278	2.97484	control	control_spike-calibration	LC Internal Use
1965	xbz_14635	UCAGAGUUGACGAUC	64	12	100.157	4.89929	34.0648	2.04744	experimental
1966	xbz_27389	UGAAUUACCGAAGGGCCAU	64	13	105.25	8.64581	36.25	2.58003	experimental
1967	xbz_3732	ACUGCAGUGAAGGCACUUGUAG	64	14	103.389	7.15494	37.3611	3.97529	experimental
1968	he_6832	ACUGCAGUGAAGGCACUUGUAG	64	15	104.657	9.71381	37.4907	4.78802	experimental
1969	he_28713	AACAUUCAACGCUGUCGGUGAGUUUGGA	64	16	389.815	32.9392	756.139	44.9855	experimental
1970	he_47874	GUGCAGUGGUAUAGUGGUGAGCAUAGCU	64	17	33659.2	281.097	25531.7	314.846	experimental
1971	he_18955	GAAAAUGAUGAAUUCUGGGGCGCUGAUU	64	18	130.556	10.1552	127.102	10.6893	experimental
1972	he_1916	UAGUACUGUGCAUAUCAUCUAU	64	19	98.0741	8.02764	30.8426	2.16239	experimental
1973	TU105	AAAUUGGCUGACUCUAACCAUUGUCAAGCUUA	64	20	91.8426	5.95648	29.5741	2.63408	experimental
1974	Ctr06-2M10		64	21	97.6852	8.7602	30.0926	1.96957	control	control_spike-calibration	LC Internal Use
1975	xbz_14635	UCAGAGUUGACGAUC	64	22	100.556	7.36668	29.4167	3.17739	experimental
1976	xbz_27389	UGAAUUACCGAAGGGCCAU	64	23	109.176	6.68913	32.287	2.30826	experimental
1977	xbz_3732	ACUGCAGUGAAGGCACUUGUAG	64	24	114.75	7.02615	37.1204	3.68812	experimental
1978	he_6832	ACUGCAGUGAAGGCACUUGUAG	64	25	120.574	5.04782	38.6852	4.04565	experimental
1979	he_28713	AACAUUCAACGCUGUCGGUGAGUUUGGA	64	26	449.852	33.2633	705.259	32.411	experimental
1980	he_47874	GUGCAGUGGUAUAGUGGUGAGCAUAGCU	64	27	40021.7	249.531	27016.7	474.743	experimental
1981	he_18955	GAAAAUGAUGAAUUCUGGGGCGCUGAUU	64	28	165.972	8.54943	126.324	20.4893	experimental
1982	he_1916	UAGUACUGUGCAUAUCAUCUAU	64	29	121.296	5.73114	31.713	2.29608	experimental
1983	TU105	AAAUUGGCUGACUCUAACCAUUGUCAAGCUUA	64	30	122.065	6.08702	29.1852	1.16128	experimental
1984	Ctr06-2M10		64	31	123.25	8.75003	29.3056	1.49428	control	control_spike-calibration	LC Internal Use
1985	Ctr07-2P		65	1	7388.88	188.847	12754.2	208.556	control	control_spike-calibration	LC Internal Use
1986	xbz_9862	UACUUGUUUUAGGAGUAUCUU	65	2	104.407	8.05476	28.0185	1.46601	experimental
1987	xbz_28720	CAAUUUAGUGUGUGUGAUAUU	65	3	111.759	5.13713	31.1296	3.13882	experimental
1988	xbz_251	CUUUCAGUCGGAUGUUUACAGC	65	4	153.593	12.6536	89.3611	12.4948	experimental
1989	he_1493	UAUUGCACUCGUCCCGGCCUCC	65	5	1844.48	57.3312	4972.19	105.214	experimental
1990	he_28866	GCGUUGGUGGUAUAGUGGUGAGGAUAGCU	65	6	36966.7	369.769	26838	271.303	experimental
1991	he_48827	UCCCUGUGAUGAAGUCACCCUGAGGGGC	65	7	150.241	12.6977	48.8889	5.4143	experimental
1992	he_19075	ACCCUGUAGUCUAGUGGUUAUGAUUUGG	65	8	161.296	13.9118	46.463	8.04128	experimental
1993	he_3446	UGAGACACGUUGCGUAUUGA	65	9	112.13	5.18281	36.1111	3.14251	experimental
1994	TU107	AGAAGGUGCUUCUCCUAGGGCCCGAGUCUAGG	65	10	104.185	5.79905	31.5926	1.1523	experimental
1995	Ctr07-2P		65	11	6252.92	81.6078	13013.9	316.388	control	control_spike-calibration	LC Internal Use
1996	xbz_9862	UACUUGUUUUAGGAGUAUCUU	65	12	99.5648	4.76999	31.1944	2.04829	experimental
1997	xbz_28720	CAAUUUAGUGUGUGUGAUAUU	65	13	102.296	4.70088	33.3056	1.98338	experimental
1998	xbz_251	CUUUCAGUCGGAUGUUUACAGC	65	14	137.537	8.40163	96.6944	14.381	experimental
[truncated: 1,971 more rows]

## Sheet: 处理后数据
		Sample A		Sample B					Diagnol Lines
索引	探针_ID	信号值	标准偏差	信号值	标准偏差	p值	log2 (SampeB / SampleA)	说明	P1	P2
1170	he_1011	708.874	38.0256	365.969	20.9006	1.98619e-13	-0.95381		1	1
1150	he_1011	650.893	58.6982	290.465	32.2415	2.11563e-07	-1.16406		100000	100000
1160	he_1011	616.545	55.329	332.123	37.8882	3.91859e-05	-0.892488		1	1.5
3158	he_1012	9570.81	166.708	11626.9	341.982	1.59127e-07	0.280748		100000	150000
3138	he_1012	9021.3	166.224	9791.88	193.759	0.0041642	0.11825		1.5	1
3148	he_1012	8507.06	169.884	9397.05	258.997	0.00633025	0.143548		150000	100000
940	he_10229	13332.4	146.881	10466.9	182.412	0	-0.349104
960	he_10229	16315.7	216.584	12790.5	313.176	0	-0.351192
950	he_10229	13292.3	273.372	10439.6	315.835	6.32117e-12	-0.348522
2929	he_10363	11352.7	115.022	37937.2	193.621	0	1.74057
2919	he_10363	12435	110.013	39531.4	246.109	0	1.6686
2939	he_10363	12450.5	167.616	46087	720.607	0	1.88816
1010	he_10527	21992.2	280.506	20854.8	240.008	0.00160287	-0.0766154
1051	he_10552	20.7207	6.36805	119.954	12.0167	2.91835e-08	2.53333
1041	he_10552	3.26328	4.23209	135.118	24.4167	7.40191e-06	5.37175
1031	he_10552	4.63907	4.66766	131.621	24.0446	1.31962e-05	4.82641
1600	he_11181	5989.12	118.216	8190.86	150.934	0	0.45167
1590	he_11181	6144.54	200.766	8728.05	187.328	0	0.506354
1610	he_11181	7267.21	147.561	9379.93	253.709	2.63933e-12	0.368175
1072	he_11413	5.70479	3.84619	141.447	17.7342	1.58786e-09	4.63194
1082	he_11413	32.9281	7.28809	142.843	12.5334	4.91966e-09	2.11704
1062	he_11413	16.1596	7.25311	145.596	18.9234	1.62897e-07	3.1715
1103	he_11415	4.21679	4.47852	194.07	19.5112	5.55112e-15	5.52429
1093	he_11415	11.831	5.0176	150.093	16.4729	1.33683e-10	3.66521
1113	he_11415	29.4918	5.95372	156.122	18.7213	1.4486e-07	2.40428
2061	he_11553	31.391	8.30378	126.433	19.0891	0.000191545	2.00995
2051	he_11553	50.1105	10.4228	123.147	16.6243	0.00277985	1.2972
2071	he_11553	40.4493	7.02558	132.212	25.284	0.00336797	1.70867
3342	he_11555	220.361	21.8624	426.263	33.8181	5.38971e-06	0.951874
3332	he_11555	185.444	23.4556	381.064	35.0585	3.5773e-05	1.03905
3322	he_11555	210.174	14.05	367.432	31.7387	7.48138e-05	0.805893
1206	he_11793	3336.3	53.7501	2521.81	75.5276	0	-0.403793
1186	he_11793	2979.48	86.9673	2423.38	112.156	8.88862e-05	-0.298041
1196	he_11793	2864.76	126.583	2393.05	83.3628	0.00168917	-0.259563
140	he_12202	711.551	24.9092	519.946	25.9763	9.3944e-07	-0.452605
130	he_12202	746.455	25.7953	548.291	38.9889	5.93761e-05	-0.445115
150	he_12202	800.386	45.1654	621.844	41.3743	0.00443952	-0.364143
3900	he_12203	52.8108	5.18964	19.978	4.47112	0.00165526	-1.40242
615	he_12204	4753.01	87.0101	12444.5	342.035	0	1.3886
595	he_12204	4650.33	197.622	10735.2	200.094	0	1.20694
605	he_12204	4286.74	115.334	10842.6	331.689	0	1.33876
1268	he_12588	13.8048	4.04727	51.0649	7.18881	0.00321612	1.88716
1248	he_12588	7.28852	3.73527	57.599	12.4933	0.00432212	2.98235
2807	he_129	22.169	9.06687	106.359	14.0144	7.15798e-05	2.26233
2797	he_129	27.9913	8.79626	94.7559	13.8412	0.00150712	1.75924
2817	he_129	39.0961	5.40937	100.546	15.3933	0.00344873	1.36275
1289	he_13183	112.096	18.7408	204.767	21.7375	0.00631469	0.86925
1310	he_13555	18223.9	220.31	24565.3	249.817	0	0.430792
1320	he_13555	18108.5	239.292	23802.6	398.013	0	0.394452
1330	he_13555	21010.4	152.604	27074.9	500.881	0	0.365854
1351	he_13758	28609.9	278.27	25635.5	263.077	6.43929e-15	-0.158374
1341	he_13758	28978.1	344.338	25722.3	285.548	2.45248e-13	-0.171945
1361	he_13758	33009	281.693	28931	547.586	2.27773e-11	-0.190242
1392	he_13856	26291.4	213.988	11023.7	193.132	0	-1.25399
1382	he_13856	22618.4	245.108	10141.6	157.583	0	-1.15721
1372	he_13856	22863.7	293.723	10745.4	113.106	0	-1.08933
1423	he_13939	3227.95	78.4535	1979.01	67.2963	0	-0.705834
1403	he_13939	2688.53	72.5279	1933.5	76.0135	2.02571e-12	-0.475599
1413	he_13939	2673.47	131.213	1818.78	81.2597	3.66032e-08	-0.555747
1434	he_14017	34087.1	345.294	26383	309.128	0	-0.369618
1444	he_14017	33616.1	397.398	25730.2	389.141	0	-0.385691
1454	he_14017	38707	262.692	29200.4	697.699	0	-0.406608
2619	he_14115	426.732	30.8245	1374.91	60.2005	0	1.68793
2609	he_14115	459.286	31.8387	1396.17	63.081	0	1.60401
2629	he_14115	500.211	44.4552	1374.7	74.9456	0	1.45851
2602	he_14382	41.6672	4.62015	14.8633	4.24485	0.0063784	-1.48716
1506	he_14386	119.786	17.2371	7776.17	122.727	0	6.02052
1516	he_14386	177.846	12.9007	8166.5	147.153	0	5.52102
1496	he_14386	143.345	20.6959	8189.16	182.111	0	5.83615
1527	he_14393	38.7026	12.3454	1071.23	24.6356	0	4.79069
1537	he_14393	26.9587	11.0432	1025.05	40.5207	0	5.2488
1547	he_14393	58.726	9.86669	1002.9	49.3331	0	4.09404
695	he_14423	619.969	28.716	860.549	43.8377	3.15844e-05	0.473062
705	he_14423	594.177	26.5842	817.482	45.9692	0.000140773	0.460293
685	he_14423	684.04	40.2957	864.635	47.9712	0.00919973	0.338011
1989	he_1493	2035.26	67.0402	4225.77	89.977	0	1.05401
1999	he_1493	1754.97	49.078	4168.71	140.356	0	1.24815
2009	he_1493	1940.52	104.139	3778.99	108.905	0	0.961557
1281	he_15138	15.7828	4.23828	76.1887	13.2384	0.0010515	2.27123
1291	he_15138	16.5411	6.73014	63.507	11.0844	0.00761675	1.94086
2547	he_15140	3093.03	65.2432	2440.16	96.7621	3.43005e-08	-0.342044
2567	he_15140	3040.76	135.079	2487.96	109.942	0.00132507	-0.289468
2247	he_15142	5526.75	82.8264	19264	209.983	0	1.8014
2257	he_15142	6252.61	172.411	18250.7	252.988	0	1.54542
2237	he_15142	6288.93	110.834	18947.4	390.232	0	1.59112
1095	he_15588	20783.8	85.2781	8046.24	110.746	0	-1.36907
1105	he_15588	20467.4	143.593	7665.64	68.8955	0	-1.41685
1115	he_15588	25093.2	207.768	9126.57	82.0513	0	-1.45915
1599	he_15624	252.645	18.2438	542.773	22.1679	0	1.10324
1589	he_15624	322.93	24.7185	599.323	38.1047	3.99578e-08	0.892113
1609	he_15624	351.738	25.6317	573.082	38.3416	1.60773e-05	0.704238
3136	he_15651	8815.02	79.8551	23849.3	174.558	0	1.43591
3146	he_15651	8109.8	45.6597	22648.9	278.93	0	1.4817
3156	he_15651	8724.7	98.7503	27606.6	418.857	0	1.66183
2836	he_15653	5189.33	109.554	15297.2	236.423	0	1.55964
2846	he_15653	5756.74	154.285	16345.1	253.143	0	1.50554
2826	he_15653	5755.71	150.82	15099.2	275.69	0	1.39141
1630	he_15724	25423.8	359.689	43470	247.392	0	0.773842
1620	he_15724	25597.9	276.801	44573.4	497.449	0	0.800156
1640	he_15724	29150.1	215.806	48887.5	934.485	0	0.745965
867	he_1586	21056.9	100.593	12117.2	126.767	0	-0.797241
847	he_1586	17654.4	133.963	10142.2	160.582	0	-0.799657
857	he_1586	17280	128.817	9697.03	191.854	0	-0.833491
127	he_16205	76.1635	7.446	187.495	20.4609	2.43862e-05	1.29968
137	he_16205	59.7227	8.73401	157.387	16.7136	2.98824e-05	1.39797
147	he_16205	68.4356	13.7201	174.351	20.6121	0.000341475	1.34918
3939	he_16206	124.693	13.3967	48.4393	14.8658	0.00100617	-1.36413
3949	he_16206	111.029	10.7498	61.1214	8.65562	0.00352438	-0.861188
3959	he_16206	115.742	16.9962	50.7104	11.0283	0.0052282	-1.19056
1651	he_16347	4.39101	3.92834	50.7529	12.5603	0.0092667	3.53087
1702	he_16349	47.9798	11.3843	1794.86	61.5803	0	5.2253
1682	he_16349	29.2672	6.31064	1821.1	73.0072	0	5.95938
1692	he_16349	21.6785	10.2722	1797.78	88.9075	0	6.37381
1744	he_16726	22740.5	230.851	25107	385.859	3.21624e-07	0.142828
1754	he_16726	22388.3	228.691	24232.3	292.483	1.52926e-06	0.114187
1191	he_16755	4911.27	131.318	722.468	33.1209	0	-2.76509
1201	he_16755	5271.43	206.62	716.403	62.1086	0	-2.87935
1181	he_16755	5517.71	242.834	642.046	45.5775	0	-3.10332
3683	he_17153	2742.37	80.0351	5323.58	82.6272	0	0.956973
3673	he_17153	2483.5	59.8561	4863.32	103.07	0	0.969563
3663	he_17153	2686.47	69.1775	5454.5	193.993	0	1.02173
3687	he_17301	27.655	2.99902	3.72646	4.1487	0.00606298	-2.89166
1775	he_17407	39.1619	9.01321	321.944	24.6112	0	3.03929
1785	he_17407	14.3755	9.10805	346.456	38.9658	9.65894e-14	4.59099
1795	he_17407	49.5513	11.7045	302.623	29.6271	3.39495e-12	2.61053
1857	he_17441	67.078	15.0008	2008.28	54.5797	0	4.90398
1837	he_17441	34.0078	9.63798	2113.17	65.9757	0	5.9574
1847	he_17441	27.9675	11.1854	2058.9	76.8607	0	6.20197
181	he_17857	632.838	30.7594	487.704	34.585	0.00273663	-0.37583
161	he_17857	631.559	52.9481	450.068	38.5979	0.00654385	-0.488774
1888	he_18129	232.45	25.1702	816.445	55.3084	0	1.81243
1868	he_18129	140.836	19.3392	760.87	66.4241	1.11022e-16	2.43363
1878	he_18129	121.084	29.0975	784.323	80.6107	3.08309e-13	2.69544
1919	he_18225	38259.5	203.772	29072.8	438.114	0	-0.396147
1909	he_18225	33262	310.1	25831.9	407.843	0	-0.364718
1899	he_18225	33538.4	451.606	26753.3	230.802	0	-0.326093
1950	he_18278	39420.4	344.122	29202.8	435.556	0	-0.432836
1940	he_18278	33946.7	308.241	25506	434.869	0	-0.412433
1930	he_18278	34191.5	480.367	27091.9	196.97	0	-0.335777
1971	he_18955	21.4315	8.58796	114.154	12.64	2.43448e-06	2.41318
1961	he_18955	29.3433	8.98956	119.307	18.0048	0.000284071	2.02358
2216	he_19454	2250.16	63.3445	1442.95	41.5205	0	-0.641013
2226	he_19454	2544.04	85.0369	1339.1	78.8264	0	-0.925857
2206	he_19454	2567.05	100.431	1441.6	53.2142	0	-0.832443
2023	he_19455	1866.67	71.0466	3011.04	102.072	0	0.689795
2043	he_19455	2228.55	73.636	3028.4	96.6216	3.62018e-10	0.442449
2033	he_19455	1815.26	79.346	2857.82	182.139	4.69677e-07	0.654738
2828	he_197	16277	226.81	9079.72	373.257	0	-0.842112
2848	he_197	17596.4	298.341	11116.1	506.138	0	-0.662625
2838	he_197	15227.2	301.826	9284.28	503.33	0	-0.713786
2064	he_19742	33776.3	326.463	25240.1	204.346	0	-0.420291
2074	he_19742	38787.1	191.874	28734.9	553.054	0	-0.432774
2054	he_19742	33911.8	522.065	26036.3	257.804	0	-0.381263
3169	he_1991	40167.7	320.426	24542.8	186.161	0	-0.710736
3189	he_1991	43310.6	258.003	29980.8	348.326	0	-0.53068
3179	he_1991	37245.6	441.607	23897.6	446.425	0	-0.640205
3718	he_19980	28.7265	3.09889	5.68806	2.51854	0.00264699	-2.33637
2085	he_20008	21148.4	341.566	23943.8	386.648	1.36303e-07	0.179102
2095	he_20008	20873	414.494	23169.3	189.959	1.02898e-06	0.150576
2105	he_20008	24207.8	151.591	26332.9	466.197	2.7483e-05	0.121396
2198	he_20151	36954.6	236.145	28948.3	366.142	0	-0.352272
2188	he_20151	31913.3	303.573	24652.4	376.758	0	-0.372429
2178	he_20151	32428.9	450.706	25637.6	339.897	0	-0.339021
2209	he_20180	1857.82	58.9543	629.665	33.3784	0	-1.56096
2229	he_20180	2233.96	96.8368	662.226	27.1187	0	-1.75421
2219	he_20180	1884.65	71.7016	621.18	36.3013	0	-1.60122
2260	he_20181	1271.7	64.3682	205.374	17.1307	0	-2.63044
2240	he_20181	1088.43	53.156	195.977	22.8841	0	-2.47349
2250	he_20181	1052.55	67.376	184.5	19.4901	0	-2.5122
571	he_20271	484.459	30.5466	663.582	53.566	0.00871981	0.4539
805	he_2031	27339.9	147.584	11178.4	167.917	0	-1.29029
785	he_2031	22633.5	166.316	9312.55	153.269	0	-1.28121
795	he_2031	22105.1	271.952	8983.28	221.537	0	-1.29907
3931	he_20337	31.8028	3.45743	6.3115	4.43919	0.00564457	-2.3331
3714	he_20374	9680.92	111.655	21967.3	368.383	0	1.18214
3694	he_20374	9652.73	119.892	24144.1	509.426	0	1.32266
3704	he_20374	8962.97	147.73	21168.3	454.432	0	1.23985
612	he_2066	7296.35	386.565	51.477	12.0045	0	-7.1471
602	he_2066	6867.98	394.678	48.6902	9.06091	0	-7.14011
592	he_2066	6680.1	394.911	39.5621	9.36699	0	-7.39961
2291	he_20697	2993.27	271.169	509.963	61.4333	0	-2.55326
2281	he_20697	2164.23	211.282	426.236	43.8334	1.11022e-15	-2.34413
2271	he_20697	1777.85	196.716	375.901	50.8407	6.18661e-12	-2.24171
2322	he_20870	65.1268	10.3494	16.1265	5.36075	0.00116962	-2.01382
2353	he_20896	18915.1	189.101	8526.53	166.52	0	-1.14951
2343	he_20896	16315	249.343	7657.29	130.401	0	-1.09129
2333	he_20896	16631.8	240.616	8066.4	146.41	0	-1.04395
2384	he_20915	7675.04	93.8844	2475.7	71.075	0	-1.63234
2374	he_20915	6734.02	147.146	2289.47	48.0807	0	-1.55645
2364	he_20915	6761.18	139.921	2451.99	64.2479	0	-1.46332
2415	he_20919	13011.8	130.197	22313.4	296.306	0	0.778095
2395	he_20919	11422.5	235.386	20738.5	267.086	0	0.860434
2405	he_20919	11374.8	241.287	19695.2	225.544	0	0.792008
2457	he_20936	6725.31	201.8	8885.11	284.01	1.71615e-09	0.40179
2477	he_20936	7901.06	190.518	9503.35	255.619	1.18961e-06	0.26639
2467	he_20936	6709.68	186.827	8276.14	287.2	1.01997e-05	0.302714
971	he_20939	9870.71	111.27	14249.9	176.67	0	0.52973
991	he_20939	11798.6	125.35	16889.1	212.17	0	0.517472
981	he_20939	9754.81	142.219	13920.6	245.014	0	0.51304
2508	he_20942	75.2672	10.9444	25.2415	8.00095	0.00303843	-1.57622
2539	he_20968	28992.6	254.292	32846.3	436.576	8.55982e-14	0.180049
2519	he_20968	25670.7	585.264	27976.6	316.115	0.00084069	0.124094
2529	he_20968	25445.1	260.332	26834.1	327.045	0.00144813	0.0766815
2102	he_21018	625.967	58.7471	290.564	16.3422	1.34615e-07	-1.10723
2082	he_21018	555.46	59.4039	306.327	38.2226	0.000567076	-0.858608
2092	he_21018	518.123	47.8294	302.193	39.68	0.000741668	-0.777826
2570	he_21059	25.821	7.18688	369.51	21.2725	0	3.83899
2550	he_21059	13.3136	6.77675	370.552	27.2401	0	4.7987
2560	he_21059	7.47801	6.1001	400.201	37.2121	0	5.74193
3191	he_21561	26316.3	191.419	40039	333.181	0	0.605449
3171	he_21561	22664.7	282.55	35067.6	236.884	0	0.62969
3181	he_21561	22132.4	234.284	36281.9	369.893	0	0.713092
2601	he_21566	25485.9	147.905	11364.5	198.842	0	-1.16517
2591	he_21566	22194.3	208.138	9485.78	204.139	0	-1.22635
2581	he_21566	22228.1	359.209	10096	122.438	0	-1.1386
3760	he_21594	172.972	18.2272	840.442	38.6195	0	2.28061
3780	he_21594	210.413	17.3021	954.61	48.6976	0	2.18169
3770	he_21594	170.195	23.0026	888.415	51.6383	0	2.38404
2433	he_21649	6423.75	124.071	8637.32	147.939	0	0.427168
2443	he_21649	7296.93	126.074	8327.74	133.322	6.95574e-08	0.190637
2423	he_21649	7205.24	97.0466	8559.56	226.74	1.17343e-07	0.248491
3200	he_2174	641.734	38.0919	106.584	17.7157	0	-2.58998
3220	he_2174	592.348	42.9647	117.026	15.2077	0	-2.33962
3210	he_2174	558.895	44.7585	113.023	11.5151	0	-2.30596
3231	he_2186	18495.3	179.085	16154	131.635	0	-0.19527
3251	he_2186	20436	135.623	19328.1	155.82	7.90283e-08	-0.0804115
3241	he_2186	17506.4	217.021	15794.7	264.535	4.3666e-07	-0.148438
2612	he_21871	4.14094	5.50995	384.04	28.1254	0	6.53515
2632	he_21871	14.7636	5.62846	395.964	31.642	0	4.74525
2622	he_21871	1	4.19597	546.566	50.7745	0	9.09425
2663	he_21872	39.3851	9.04653	331.697	19.0875	0	3.07415
2643	he_21872	16.5056	4.6754	340.312	29.7774	0	4.36583
2653	he_21872	19.8317	6.894	328.318	36.5743	1.51656e-13	4.04921
2684	he_21873	49.4413	6.18499	1571.46	31.4162	0	4.99024
2674	he_21873	36.7559	15.2408	1721.77	75.6209	0	5.54977
2694	he_21873	60.1606	8.41182	1757.29	82.4648	0	4.86839
457	he_21878	855.377	48.8206	3034.32	104.403	0	1.82674
447	he_21878	854.424	37.7258	2979.85	108.515	0	1.80222
437	he_21878	933.289	45.9747	3370.31	125.28	0	1.85249
2705	he_21880	361.542	42.678	937.998	33.1012	0	1.37542
2725	he_21880	453.462	30.0101	985.032	44.7407	0	1.11919
2715	he_21880	389.087	27.2878	867.421	41.2273	0	1.15664
2756	he_21967	7531.91	149.41	5006.07	96.1557	0	-0.589337
2746	he_21967	6598.67	120.095	4217.95	136.003	0	-0.645636
2736	he_21967	6666.98	157.105	4371.28	90.768	0	-0.608977
2777	he_22155	5.5335	6.13797	61.5579	11.9132	0.00180131	3.47568
2767	he_22155	3.45849	2.79723	58.8433	16.4198	0.00987097	4.08866
2798	he_22404	6.5557	4.90461	102.895	13.243	1.76231e-07	3.97228
2808	he_22404	7.35325	3.97243	101.525	17.005	1.78493e-05	3.78732
2818	he_22404	22.806	6.86488	94.1777	11.6921	7.22904e-05	2.04598
2880	he_22725	8546.14	57.676	15915.1	175.255	0	0.897055
2860	he_22725	7567.77	107.911	13561.5	277.287	0	0.841573
2870	he_22725	7471.54	144.777	13159.7	277.653	0	0.816646
3942	he_23031	108.938	9.15561	28.0817	10.5958	4.03231e-06	-1.9558
3962	he_23031	101.862	10.108	30.2111	8.21292	1.50982e-05	-1.75346
3952	he_23031	103.462	14.0585	28.7007	10.2106	0.000303693	-1.84994
2891	he_23346	2442.4	84.2918	1157.44	50.417	0	-1.07736
2901	he_23346	2424.76	98.2476	1207.85	60.9309	0	-1.00541
2911	he_23346	2834.56	116.468	1405.85	75.0765	0	-1.01169
2942	he_23347	3443.87	79.5878	2206.92	89.4859	0	-0.641994
2932	he_23347	2996.99	85.3933	1888.81	93.0488	0	-0.666035
2922	he_23347	3015.86	114.021	1989.35	74.2345	1.01696e-13	-0.600276
2973	he_23413	9998.93	97.7251	2762.19	91.5221	0	-1.85596
2953	he_23413	8762.24	141.042	2396.23	96.9317	0	-1.87054
2963	he_23413	8867.13	184.452	2327.29	74.0339	0	-1.92982
2505	he_23458	401.842	27.1215	306.679	18.3707	0.00695139	-0.389899
3262	he_2348	7343.48	106.306	4645.58	52.1191	0	-0.660606
3272	he_2348	6677.1	145.984	4465.49	97.5708	0	-0.580405
3282	he_2348	7636.07	161.73	5471.33	118.702	0	-0.480939
3025	he_23737	16427.3	241.447	12781.9	273.467	0	-0.361989
3035	he_23737	18751.1	125.2	16046.1	320.547	3.33067e-15	-0.224749
3015	he_23737	16506.4	338.141	12479.2	414.774	3.53051e-14	-0.403497
3293	he_2388	2392.75	70.6291	1167.8	42.4484	0	-1.03488
3303	he_2388	2203.04	55.6384	1162.09	56.8262	0	-0.922778
3313	he_2388	2255.1	86.3199	1321.25	71.63	3.33067e-16	-0.771288
3066	he_23954	415.415	42.4381	50.0888	9.59015	5.9952e-15	-3.052
3046	he_23954	261.197	32.6346	39.1634	6.98425	1.4019e-09	-2.73756
3056	he_23954	289.871	43.8338	45.6176	7.58879	2.6131e-07	-2.66775
3877	he_24	46.5707	5.65867	11.2527	6.5426	0.0036245	-2.04915
3097	he_24113	1448.24	84.0132	447.018	33.2176	0	-1.6959
3077	he_24113	1002.84	68.9036	303.98	25.7827	0	-1.72204
3087	he_24113	1070.5	74.4949	357.2	42.2886	7.77156e-16	-1.58348
3159	he_24403	7355.14	84.2319	4187.54	123.054	0	-0.812651
3149	he_24403	6509.72	191.268	3546.83	93.4817	0	-0.876067
3139	he_24403	6583.17	204.364	3660.79	108.639	0	-0.84663
743	he_24730	643.508	29.2355	355.575	19.9576	1.13687e-13	-0.855804
723	he_24730	488.087	36.168	310.12	26.8617	0.000185111	-0.654309
733	he_24730	469.635	42.7577	305.974	21.3344	0.00107469	-0.618132
3252	he_24979	1635.8	51.8561	4612.23	82.8397	0	1.49547
3242	he_24979	1398.19	60.4064	3830.56	83.3056	0	1.45399
3232	he_24979	1446.03	34.0224	3946.92	122.982	0	1.44863
6	he_24981	1776.97	37.3488	3650.02	94.3259	0	1.03848
16	he_24981	1629.84	78.9127	3232.04	63.1905	0	0.987709
26	he_24981	1862.77	64.6318	3685.88	107.165	0	0.984561
574	he_25080	6588.91	103.219	20082.4	163.294	0	1.60782
564	he_25080	7273.26	219.88	20843.8	106.25	0	1.51894
584	he_25080	7490.77	110.023	23855.9	325.373	0	1.67116
2340	he_25081	5365.97	132.888	17512.9	127.376	0	1.70651
2330	he_25081	5987.01	122.06	17372.4	204.889	0	1.53689
2350	he_25081	6090.62	118.628	16889.3	238.999	0	1.47145
540	he_25083	6061.81	90.004	17851.8	120.298	0	1.55825
550	he_25083	6267.63	167.433	18672.5	295.578	0	1.57493
530	he_25083	6595.48	96.2239	20851.6	536.005	0	1.66061
2857	he_25098	169.563	19.5829	38.865	8.94707	1.64375e-07	-2.12528
2867	he_25098	157.195	17.1742	47.4238	8.84604	1.4085e-06	-1.72887
2877	he_25098	156.345	20.6292	43.4838	8.4341	1.04329e-05	-1.84618
3373	he_25099	7839.62	99.6869	18782.6	284.759	0	1.26054
3353	he_25099	7817.6	70.0659	16552.9	229.632	0	1.08228
3363	he_25099	7167.26	94.0228	15009.9	196.829	0	1.06642
3869	he_25100	206.357	19.1835	34.4507	8.3358	2.23188e-12	-2.58254
3849	he_25100	199.166	17.3428	44.1774	9.69529	3.76831e-11	-2.17259
3859	he_25100	157.662	14.6051	34.4713	8.3417	1.56751e-09	-2.19337
88	he_25101	1715.67	51.8953	5683.35	88.3934	0	1.72797
78	he_25101	1553.57	50.4896	4959.81	80.3299	0	1.67469
68	he_25101	1690.1	77.6608	5606.53	176.138	0	1.73
1263	he_25103	1585.68	39.2353	3853.13	49.7941	0	1.28093
1253	he_25103	1517.52	60.5266	4250.55	100.155	0	1.48593
1243	he_25103	1652.02	64.4487	3721.47	93.4694	0	1.17164
3283	he_25375	31539	159.804	26640.2	224.455	0	-0.243532
3263	he_25375	27999.8	554.236	23558.1	285.946	6.7657e-13	-0.249191
3273	he_25375	27563.2	365.893	23696.4	416.764	2.06601e-12	-0.218075
3776	he_25409	1171.22	34.9061	1664.16	48.9892	3.39728e-14	0.506776
3756	he_25409	1165.53	36.589	1798.45	73.8382	5.12479e-13	0.625775
3766	he_25409	1050.17	52.142	1536.54	78.4848	1.25462e-06	0.549054
3335	he_25586	36.0337	6.88027	230.058	15.8493	0	2.67458
3345	he_25586	56.0054	5.47729	253.409	18.5015	0	2.17783
3325	he_25586	30.5039	6.33311	248.767	31.5078	2.84159e-09	3.02773
3366	he_25588	35.8797	6.06354	197.263	18.3864	9.41347e-12	2.45888
3356	he_25588	31.5732	7.01826	210.348	22.3326	1.3059e-10	2.73601
3376	he_25588	51.6197	5.74455	206.765	24.2619	1.41012e-07	2.002
1642	he_25668	24368.2	292.534	47835	553.497	0	0.973068
1622	he_25668	19444.3	198.087	41211.5	563.18	0	1.0837
1632	he_25668	19089.1	134.473	37746	525.212	0	0.983574
3407	he_25669	1737.25	38.181	174.394	13.9949	0	-3.31638
3387	he_25669	1541.96	43.6093	157.992	20.8199	0	-3.28684
3397	he_25669	1471.37	74.438	150.296	7.35442	0	-3.29128
3438	he_25673	1585.97	31.9305	402.586	25.5286	0	-1.978
3428	he_25673	1411.04	68.0184	333.145	21.1917	0	-2.08253
3418	he_25673	1426.81	103.503	336.721	27.984	0	-2.08316
3449	he_25674	8210.13	121.873	875.822	31.2864	0	-3.22869
3469	he_25674	8963.66	148.912	983.475	36.8177	0	-3.18813
3459	he_25674	7980.52	226.316	901.997	49.728	0	-3.14529
3480	he_25676	449.41	20.7551	62.0916	7.01966	0	-2.85556
3500	he_25676	535.912	30.5079	65.426	10.1899	0	-3.03406
3490	he_25676	477.433	26.3468	67.6711	10.7245	0	-2.81869
3511	he_25688	520.112	22.0539	66.2462	7.72916	0	-2.97291
3521	he_25688	488.766	28.1055	69.328	7.51687	0	-2.81763
3531	he_25688	591.637	40.4414	75.7853	9.06409	0	-2.96472
3562	he_25690	43363.9	256.53	17554	175.11	0	-1.3047
1539	he_25690	29696.5	163.623	15610.2	145.138	0	-0.927804
1549	he_25690	37565	276.768	19352.6	190.232	0	-0.956862
3552	he_25690	38594.5	361.685	17336.2	344.027	0	-1.1546
3542	he_25690	39898.8	608.97	16579.6	264.561	0	-1.26694
1529	he_25690	30346.7	391.365	17062.6	193.792	0	-0.830698
3573	he_25693	35.1024	5.45774	8.97904	2.71524	0.00680118	-1.96693
3604	he_25699	12655.6	170.995	15400.8	170.667	0	0.283224
3624	he_25699	13599.9	149.595	16234.3	181.903	0	0.255445
3614	he_25699	12488.6	182.153	15945.8	301.525	0	0.352564
3635	he_25704	474.956	20.2498	198.707	15.2439	0	-1.25715
3655	he_25704	525.136	26.0718	231.376	16.522	0	-1.18245
3645	he_25704	452.629	33.5914	219.879	15.1816	6.27319e-09	-1.04162
3686	he_25712	1047.26	25.3919	30.7159	5.09164	0	-5.09149
3676	he_25712	845.874	43.2964	26.6221	6.77839	0	-4.98974
3666	he_25712	706.252	41.9783	21.7751	4.83161	0	-5.01943
3717	he_25728	18925	402.841	230.523	21.3636	0	-6.35924
1673	he_25728	13920.8	336.12	180.973	22.3669	0	-6.26532
1663	he_25728	10091.4	265.884	150.772	16.2386	0	-6.06461
3707	he_25728	17282.7	508.95	228.835	26.2122	0	-6.23888
3697	he_25728	16170.4	498.212	183.505	16.6545	0	-6.4614
1653	he_25728	9606.01	364.432	147.837	20.6999	0	-6.02185
3738	he_25733	9465.93	220.569	312.43	25.9983	0	-4.92114
3748	he_25733	10453.1	249.91	345.2	37.8742	0	-4.92035
3728	he_25733	8464.28	333.962	276.528	18.6183	0	-4.93589
1704	he_25733	7980.37	368.173	278.19	33.7059	0	-4.84231
1694	he_25733	5553.86	404.83	222.852	21.5935	0	-4.63933
1684	he_25733	4935.27	379.831	204.265	25.1671	0	-4.59461
3779	he_25747	16627.7	152.421	7580.22	129.37	0	-1.13327
1611	he_25747	14456.9	109.586	7508.55	164.875	0	-0.945153
3759	he_25747	15905.4	239.922	7096.92	107.093	0	-1.16425
1591	he_25747	11713.5	161.307	6581.78	103.275	0	-0.831626
1601	he_25747	11552.4	125.946	6184.83	161.094	0	-0.901391
3769	he_25747	15510.4	257.895	7417.11	222.35	0	-1.06431
3810	he_25748	9383.95	140.409	2659.76	66.895	0	-1.8189
1580	he_25748	8559.83	119.289	2866.56	83.3957	0	-1.57826
1570	he_25748	6780.48	93.6981	2436.2	80.265	0	-1.47676
3800	he_25748	8772.97	212.236	2606.87	111.489	0	-1.75075
1560	he_25748	7004.72	133.176	2684.91	119.994	0	-1.38345
3790	he_25748	9197.49	263.39	2609.13	118.349	0	-1.81767
3821	he_25753	199.967	19.0751	116.639	12.235	0.00120465	-0.777714
3841	he_25753	219.348	22.945	133.999	13.7559	0.00389568	-0.710995
3852	he_25776	12929.6	166.081	5937.75	138.957	0	-1.12269
3872	he_25776	13454.3	172.368	6368.81	181.041	0	-1.07898
3862	he_25776	12642.2	222.911	6043.79	112.56	0	-1.06472
3883	he_25777	3652.06	59.6967	1374.39	58.6641	0	-1.40992
3903	he_25777	3554.48	89.3384	1413.74	72.8628	0	-1.33013
3893	he_25777	3376.43	124.382	1385.19	44.9306	0	-1.28541
3934	he_26079	65.7796	7.9093	22.2867	4.61518	0.000616503	-1.56146
774	he_26104	2507.92	59.3539	762.189	35.9457	0	-1.71827
754	he_26104	1991.52	52.0368	642.374	43.7545	0	-1.63239
764	he_26104	1927.29	57.7083	622.386	36.5889	0	-1.63069
3955	he_26137	28763.2	342.015	10644.2	222.076	0	-1.43415
3965	he_26137	29949.9	389.674	11034.2	290.514	0	-1.44057
3945	he_26137	28872.4	401.361	10755.7	273.855	0	-1.42459
29	he_26246	40106.2	264.976	23386.9	336.555	0	-0.778127
9	he_26246	33793.6	225.472	23807.8	718.583	0	-0.505316
19	he_26246	33280.1	403.738	23561.4	680.875	0	-0.498232
91	he_26307	10571.6	84.5634	18940.6	177.987	0	0.841295
81	he_26307	8890.21	174.337	18494.8	337.759	0	1.05683
71	he_26307	9046.08	103.106	18407.7	391.46	0	1.02494
122	he_26540	40422.4	279.278	23698	198.882	0	-0.770389
102	he_26540	34587.3	310.41	23415.7	619.777	0	-0.562769
112	he_26540	33360.4	308.286	23784.9	647.289	0	-0.488091
945	he_26755	29.5302	6.11287	70.0586	9.06216	0.0089006	1.24637
1556	he_27079	31.091	9.19757	99.2066	9.0491	8.35539e-05	1.67394
1566	he_27079	19.8752	6.85486	99.7008	18.5393	0.00112036	2.32663
1607	he_27218	6470.92	78.1912	4479.3	75.0367	0	-0.530696
1587	he_27218	6219.07	136.795	4881.55	81.4177	1.11022e-16	-0.349358
1597	he_27218	5418.83	97.5555	4574.13	162.465	7.70144e-06	-0.244486
2587	he_27671	1407.11	43.9718	1790.77	53.2528	2.63843e-07	0.347842
1628	he_27706	23106.5	379.493	25969.6	287.384	4.68272e-09	0.168526
1110	he_27875	521.886	29.0588	870.802	22.2606	0	0.738609
1100	he_27875	431.691	30.5243	910.558	44.3657	3.33067e-16	1.07675
1090	he_27875	527.949	36.4946	853.834	48.2768	7.51016e-07	0.693555
3300	he_27876	2380.62	71.9043	2093.08	69.5875	0.00408754	-0.18571
3290	he_27876	2619.72	58.199	2358.9	79.9903	0.00823585	-0.151298
1700	he_28329	141.351	16.1657	54.9826	8.42368	6.32118e-05	-1.36223
1731	he_28378	34836.5	311.414	29134.9	460.516	0	-0.257851
1711	he_28378	33100	344.216	29222.8	448.41	4.58034e-12	-0.179735
1762	he_28451	34413.5	222.037	23963.3	284.023	0	-0.522146
1742	he_28451	32400.3	523.038	23755.1	283.613	0	-0.447773
1752	he_28451	28904.8	458.387	23404.8	392.015	0	-0.304504
3029	he_28473	56.7666	12.293	16335.4	224.852	0	8.16874
3019	he_28473	49.7964	13.4225	16223.3	291.958	0	8.34781
3009	he_28473	70.9165	13.4913	17888.5	367.79	0	7.97869
1793	he_28474	260.692	21.4611	25167.5	218.236	0	6.59308
1773	he_28474	230.549	19.3761	25579.2	230.295	0	6.79375
1783	he_28474	179.977	17.3651	24800.4	284.143	0	7.10641
1824	he_28476	170.639	11.0795	8019.79	119.192	0	5.55454
1804	he_28476	151.204	17.0176	8615.42	190.677	0	5.83236
1814	he_28476	106.296	11.6491	8351.69	282.584	0	6.29591
1866	he_28480	247.011	17.4422	8644.02	140.052	0	5.12906
1876	he_28480	231.611	21.9224	8506.56	183.656	0	5.1988
1886	he_28480	312.457	34.6035	8157.72	181.359	0	4.70644
1907	he_28482	150.427	19.7815	12985.6	115.013	0	6.4317
1897	he_28482	172.805	16.9465	13400.5	136.536	0	6.277
1917	he_28482	184.874	21.0608	12762.4	249.845	0	6.10922
1938	he_28483	9.67512	7.21675	136.955	15.8182	4.70302e-09	3.82328
1928	he_28483	14.8169	5.71231	150.261	23.2722	2.08749e-06	3.34215
1948	he_28483	20.0131	6.28993	133.1	19.0354	4.12984e-06	2.73349
3248	he_28711	933.091	56.0062	1421.34	54.7404	5.61226e-09	0.607166
3238	he_28711	846.937	56.2187	1317.04	55.0617	2.3882e-08	0.63697
3228	he_28711	967.273	44.417	1306.13	49.5658	2.61572e-06	0.433303
1969	he_28713	353.878	40.9385	583.799	36.1954	0.000135244	0.722221
1959	he_28713	400.684	30.0233	615.939	42.1165	0.000170416	0.620323
1007	he_28825	54.4034	8.20138	355.033	29.1404	0	2.70618
1017	he_28825	68.7251	13.9024	346.88	31.3506	7.75713e-13	2.33553
997	he_28825	64.2266	10.1155	305.407	42.7946	8.42599e-07	2.24949
635	he_28827	9.6507	6.85789	243.182	24.348	3.33067e-15	4.65526
645	he_28827	22.5869	6.07637	221.468	22.0359	2.65898e-13	3.29354
625	he_28827	20.3349	8.30996	224.175	22.786	1.08358e-12	3.4626
2010	he_28866	35499.6	390.993	28721.9	371.682	0	-0.30565
1990	he_28866	33629.1	337.332	29385.2	297.391	0	-0.194621
2000	he_28866	30324.9	474.021	28685.5	250.285	0.00167304	-0.0801796
711	he_28961	22594.2	202.087	30607.2	329.354	0	0.437918
701	he_28961	19000	247.185	24155.5	213.944	0	0.346351
691	he_28961	19505.6	143.606	23852.6	236.296	0	0.290255
2041	he_28969	22854.7	172.004	7625.3	97.4695	0	-1.58362
2031	he_28969	19546.7	330.937	7825.2	154.735	0	-1.32072
2021	he_28969	21750.9	392.801	8037.06	187.243	0	-1.43633
2062	he_29126	22471.4	468.535	26353.1	181.037	4.00791e-14	0.229885
2072	he_29126	26150.3	272.63	27557.7	301.082	0.000885446	0.0756268
3355	he_2914	7244.73	139.621	3750.9	111.021	0	-0.949697
3375	he_2914	7740.81	135.852	4324.6	124.918	0	-0.839916
3365	he_2914	6801.88	156.611	3664.26	76.7007	0	-0.892411
92	he_29304	14531.8	103.491	18246.2	190.559	0	0.328389
82	he_29304	11876	139.622	17561.7	335.829	0	0.564387
72	he_29304	12152.4	112.017	16677.7	266.118	0	0.456681
3386	he_2937	66.2989	9.19967	291.952	14.5202	0	2.13868
3406	he_2937	70.8564	10.0945	325.377	19.3441	0	2.19914
3396	he_2937	49.8452	7.63107	304.219	25.7733	3.33067e-16	2.60958
2134	he_29411	35183.8	289.402	29259.1	458.241	0	-0.266023
2114	he_29411	33495.1	480.329	29182.5	397.772	2.98228e-12	-0.198848
3205	he_29521	9217.87	155.971	25050.3	288.893	0	1.44232
3215	he_29521	9339.62	158.745	27836.8	415.812	0	1.57556
3195	he_29521	10185.7	185.585	31645.5	794.667	0	1.63546
2165	he_29648	8321.31	103.592	6585.68	125.78	0	-0.337478
2145	he_29648	7864.03	143.378	7068.97	114.906	1.40619e-05	-0.153769
3437	he_2975	33392.4	173.023	38960.9	450.667	0	0.222507
3427	he_2975	28689.9	260.776	36248.5	691.794	0	0.337379
3417	he_2975	30532.1	280.778	37199.3	645.243	0	0.284949
2196	he_29964	26030.6	180.929	10530.4	149.874	0	-1.30565
2176	he_29964	24448.9	370.399	10788.9	202.792	0	-1.18023
2186	he_29964	21871.1	375.498	10614.6	170.06	0	-1.04297
428	he_29970	766.73	34.5833	1131.5	49.648	2.82462e-08	0.561447
418	he_29970	707.306	28.1455	1058.64	53.1948	7.82929e-08	0.581804
408	he_29970	778.495	64.4126	1108.9	56.2803	0.000336946	0.510366
2238	he_30317	26570.2	447.717	24871	222.735	0.000504556	-0.0953456
2258	he_30317	27557	172.035	26295.9	461.114	0.00807348	-0.0675828
604	he_30405	157.766	16.3642	265.342	15.3866	7.32398e-05	0.750065
2289	he_30566	9465.16	125.869	7444.63	197.377	0	-0.346425
2269	he_30566	9091.08	169.836	7677.4	162.042	1.64388e-09	-0.243834
2279	he_30566	8068.67	200.849	7324.52	186.016	0.0053271	-0.139597
2310	he_30695	23166.9	324.041	35344	438.89	0	0.609405
2320	he_30695	27166	214.956	38799.7	547.751	0	0.514243
2300	he_30695	26269.4	511.194	35342.9	375.383	0	0.428038
2341	he_30831	24194	449.352	27993.2	320.224	1.70353e-11	0.210427
2351	he_30831	28520.6	169.9	30503.2	505.223	0.000336775	0.0969577
2372	he_30884	13752.5	213.809	22350.4	256.772	0	0.700609
2382	he_30884	16162.1	162.964	23616.4	289.747	0	0.547176
2362	he_30884	15491.7	196.238	22557.7	358.956	0	0.542123
2393	he_30889	11451.5	139.123	19306.3	159.661	0	0.75353
2403	he_30889	10184.3	172.346	18723.9	160.549	0	0.87853
2413	he_30889	11757.6	100.767	19575.9	342.197	0	0.735494
2444	he_30905	15889.7	128.651	14363.6	257.03	9.08186e-08	-0.145669
2465	he_31014	379.312	44.6595	1029.07	41.5055	0	1.43989
2455	he_31014	428.998	36.2496	1064.3	49.9898	0	1.31087
2475	he_31014	456.384	30.8374	1003.34	62.2511	2.09832e-13	1.1365
2496	he_31018	18.664	5.06384	265.573	20.5042	0	3.83078
2486	he_31018	31.634	8.44062	223.091	27.8515	1.30865e-08	2.81809
2506	he_31018	43.403	10.2866	216.637	24.8322	3.5546e-08	2.31941
2558	he_31029	20.5715	6.19022	1397.21	52.072	0	6.08575
2548	he_31029	22.6504	9.97293	1365.19	61.7287	0	5.91343
2568	he_31029	32.1884	8.49713	1324.57	68.8334	0	5.36284
2589	he_31030	74.5247	11.5142	10529.6	76.4563	0	7.14251
2579	he_31030	76.1128	13.8609	10448.9	99.2226	0	7.10099
2599	he_31030	97.4157	11.2962	10880	190.935	0	6.80331
2630	he_31031	58.9247	16.4391	1540.78	49.4311	0	4.70864
2620	he_31031	35.536	6.5615	1451.86	60.1034	0	5.35248
2610	he_31031	49.1096	15.0702	1495.75	70.1848	0	4.92872
2651	he_31032	75.1744	13.9083	6253.04	118.362	0	6.37817
2641	he_31032	82.8307	22.9473	6567.69	123.627	0	6.30908
2661	he_31032	105.131	18.7668	6719.24	177.195	0	5.99804
2672	he_31033	19.0618	6.31025	226.506	17.5422	0	3.5708
2692	he_31033	25.8985	5.33227	232.378	22.6164	7.04992e-14	3.16553
2682	he_31033	26.3154	11.1606	253.899	33.4953	1.27059e-08	3.27028
2703	he_31035	37823.6	379.689	24011	205.535	0	-0.655592
2723	he_31035	39776.4	324.467	27831.1	469.548	0	-0.515213
2713	he_31035	34158.5	454.886	23582.1	301.938	0	-0.534553
2744	he_31383	22.957	6.67804	362.067	26.0835	0	3.97925
2734	he_31383	17.1823	7.41102	359.825	37.4098	9.99201e-16	4.3883
2754	he_31383	38.8326	8.41267	358.793	39.8326	1.7063e-12	3.20781
1503	he_31641	6000.03	102.245	20644	198.812	0	1.78268
1493	he_31641	6754.4	78.9067	20213.5	323.907	0	1.58142
1513	he_31641	6824.65	163.045	19658.6	298.926	0	1.52633
3073	he_31698	91.3438	14.7792	31.0345	8.02215	0.00260669	-1.55743
3093	he_31698	89.6777	11.9864	38.354	9.48771	0.00552976	-1.22537
3083	he_31698	81.7767	13.2955	31.2864	6.98443	0.00563564	-1.38615
3563	he_32	2071.32	67.7407	1428.09	75.4785	5.25763e-10	-0.536456
3543	he_32	1820.67	83.794	1273.47	39.8234	8.21488e-09	-0.515706
3553	he_32	1744.97	65.6494	1294.18	60.0674	7.13946e-07	-0.431168
2936	he_32353	13.9652	7.20242	685.359	35.7607	0	5.61695
2926	he_32353	11.2843	6.70096	736.403	43.3499	0	6.02811
2916	he_32353	30.9182	13.389	629.159	33.056	0	4.3469
1038	he_32394	3293.64	60.737	9515.23	129.192	0	1.53055
1028	he_32394	3642.07	56.6951	9245.1	158.646	0	1.34393
1048	he_32394	3731.77	72.7444	9235.5	154.172	0	1.30733
2796	he_32726	25998	443.194	23514.2	323.656	4.21328e-06	-0.14487
2878	he_33125	11787.8	618.25	1047.21	123.482	0	-3.49268
2858	he_33125	11031.2	937.979	885.6	93.9972	0	-3.63879
2868	he_33125	9847.75	847.81	873.735	90.1366	0	-3.49453
2889	he_33216	1526.54	69.4098	1245.53	57.0615	0.00191887	-0.293501
904	he_33220	2003.34	55.3432	4231.01	63.5399	0	1.07859
914	he_33220	1703.09	45.6068	4441.45	116.061	0	1.38288
924	he_33220	2033.37	84.3622	4443.27	96.8265	0	1.12775
3722	he_3332	5789.65	71.9482	11101.8	196.443	0	0.939249
3732	he_3332	5203.24	126.903	9463.17	145.341	0	0.862913
3742	he_3332	5475.77	86.7293	10722.7	231.004	0	0.969533
3422	he_33592	2510.33	73.0521	4972.94	79.8035	0	0.986224
3432	he_33592	2620.61	67.0879	5628.4	162.551	0	1.10282
3412	he_33592	2791.19	89.3418	6240.04	227.962	0	1.16068
1834	he_33594	59.1157	11.9007	319.212	32.5085	3.21876e-11	2.4329
1844	he_33594	46.3221	12.523	326.587	39.8431	1.70921e-09	2.8177
1854	he_33594	61.2593	13.155	300.612	32.996	2.57867e-09	2.2949
3002	he_33647	28549.7	230.483	12134.4	220.236	0	-1.23437
2982	he_33647	26759.3	346.027	10318.5	209.347	0	-1.3748
2992	he_33647	24359.9	484.373	10041.3	157.014	0	-1.27857
3023	he_33649	16742.5	183.362	5719.65	105.362	0	-1.54951
3033	he_33649	19289.8	224.857	6911.18	151.268	0	-1.48083
3013	he_33649	17796	875.707	5497.02	402.708	0	-1.69483
3095	he_34254	3857.31	97.5718	2010.72	75.4494	0	-0.939884
3085	he_34254	3451.6	124.519	1861.69	54.2845	0	-0.89065
3075	he_34254	3703.88	154.198	1871.65	73.6433	0	-0.984727
3230	he_35178	23276.5	359.668	7537.82	140.242	0	-1.62665
3250	he_35178	24633.2	300.851	9076.36	258.661	0	-1.44042
3240	he_35178	21337.2	465.049	7131.96	189.377	0	-1.581
3271	he_35269	33.4099	8.45447	181.897	12.5876	1.85407e-14	2.44477
3281	he_35269	58.1619	9.63748	207.113	15.5573	4.51181e-11	1.83227
3261	he_35269	47.1621	8.41793	175.746	22.7415	8.49847e-06	1.89779
2912	he_35559	2406.05	47.886	586.269	43.7482	0	-2.03703
2892	he_35559	2089.84	57.9726	513.196	33.4306	0	-2.02581
2902	he_35559	1933.29	96.4791	477.767	47.4235	0	-2.01668
253	he_35606	6930.5	126.217	2451.14	84.2657	0	-1.4995
263	he_35606	6206.19	116.499	2095.46	80.5455	0	-1.56644
273	he_35606	6926.89	156.369	2418.65	84.1433	0	-1.518
3312	he_35611	26616.9	138.966	30092.2	524.614	4.09409e-10	0.177048
3302	he_35611	23214.9	380.881	24894.7	257.172	0.000436664	0.100784
3868	he_35693	930.506	30.3249	153.132	13.404	0	-2.60324
3848	he_35693	895.432	51.3305	167.514	18.0525	0	-2.4183
3858	he_35693	844.115	63.9924	139.855	24.604	0	-2.59351
3323	he_35750	9997.27	114.051	6688.21	118.598	0	-0.579914
3333	he_35750	9249.24	155.78	6275.47	86.8509	0	-0.559611
3343	he_35750	10495.8	153.159	7903.38	96.3993	0	-0.409265
1699	he_36383	315.746	25.8065	226.101	17.3689	0.00772612	-0.481798
2910	he_365	45.147	7.01193	319.487	24.9109	0	2.82306
2900	he_365	26.8293	6.8404	337.349	29.2231	0	3.65236
2890	he_365	37.0315	9.08324	310.915	33.975	5.43143e-12	3.0697
3961	he_36507	27.7622	3.30427	5.856	2.64748	0.00539477	-2.24514
3374	he_36542	119.04	9.8749	36.1441	5.45611	2.89131e-08	-1.71962
3364	he_36542	105.988	10.1011	35.2003	7.49691	1.14071e-05	-1.59024
3354	he_36542	111.675	17.1	38.8985	9.64236	0.0014096	-1.52152
3405	he_36543	12521.3	149.629	4563.64	119.489	0	-1.45613
3385	he_36543	11991.7	174.552	3766.49	106.334	0	-1.67075
3395	he_36543	11018.8	192.884	3593.6	88.4467	0	-1.61647
3447	he_36556	4361.24	76.9781	2242.1	46.4812	0	-0.959889
3467	he_36556	4536.63	100.72	2715.46	82.2306	0	-0.740426
3457	he_36556	4063.92	163.685	2109.12	84.045	0	-0.946232
1321	he_36597	317.497	31.9386	523.157	23.9543	4.64474e-06	0.720502
1311	he_36597	323.349	21.5261	538.989	45.8179	0.000120937	0.737166
1331	he_36597	428.739	28.3675	595.766	35.2521	0.00100988	0.474647
3529	he_36616	41774.6	332.311	31711.5	277.346	0	-0.397618
3519	he_36616	36212.8	361.066	29251.5	465.247	0	-0.307991
3509	he_36616	39010.8	391.828	32230.6	883.828	1.32638e-12	-0.275444
3494	he_36697	5868.49	99.5257	979.574	43.3035	0	-2.58276
3484	he_36697	5609.19	114.188	879.352	36.4741	0	-2.67328
3474	he_36697	6265.46	148.684	1031.93	52.573	0	-2.60207
3591	he_36788	1366.93	49.9517	1986.35	36.3633	0	0.539178
3581	he_36788	1251.63	60.0054	1759.34	65.0626	7.28527e-08	0.491222
3571	he_36788	1371.97	47.836	1920.18	101.383	3.89881e-06	0.484991
3622	he_36832	27654.7	205.356	13803.8	154.966	0	-1.00246
3602	he_36832	26651.5	239.303	14286.5	424.968	0	-0.899566
3612	he_36832	24544.5	456.283	13051	341.601	0	-0.911238
3633	he_36840	43.5579	4.20122	13.1867	5.02216	0.00270788	-1.72385
3653	he_36840	46.5233	5.94313	12.0037	6.24665	0.00434608	-1.95447
3684	he_36910	49161.4	222.169	26114.4	409.673	0	-0.91268
3664	he_36910	47447.4	420.354	29283.1	752.263	0	-0.696259
3674	he_36910	43974.5	632.913	26949.4	714.173	0	-0.706414
1606	he_37062	330.301	29.5299	219.034	18.6837	0.00300291	-0.592623
3715	he_37317	44529	299.502	27756.6	371.005	0	-0.681913
3695	he_37317	42773.6	366.806	31084.2	787.593	0	-0.46054
3705	he_37317	39657.2	572.018	28859.2	697.234	0	-0.458554
3746	he_37337	16148	153.217	12380.5	179.017	0	-0.383295
3726	he_37337	15653.3	208.214	13320.7	381.294	5.70843e-08	-0.232795
3736	he_37337	14716.6	316.013	12314.8	323.246	7.7034e-08	-0.257049
3777	he_37488	68.768	7.48338	18.7138	5.53277	0.000103716	-1.87764
3757	he_37488	56.4207	6.37382	18.0697	5.48445	0.00133088	-1.64266
3808	he_37851	30559.6	200.447	9765.57	201.512	0	-1.64585
3788	he_37851	29920.2	256.142	10845.1	241.456	0	-1.46408
3798	he_37851	27944.1	267.044	9913.68	222.746	0	-1.49505
3829	he_37854	20140.1	222.343	22915.1	456.292	1.04954e-07	0.186229
3819	he_37854	21395	216.281	24738.9	608.536	4.6766e-07	0.209504
170	he_37871	17904	114.506	6573.59	112.311	0	-1.44553
160	he_37871	19773.3	223.976	7773.57	175.775	0	-1.34691
180	he_37871	20497.7	349.957	8397.49	198.337	0	-1.28743
3850	he_37889	116.139	11.7775	3236.57	107.178	0	4.80054
3870	he_37889	124.815	13.5266	3036.06	103.12	0	4.60434
3860	he_37889	93.2777	23.7627	2975.4	102.595	0	4.99541
3901	he_37892	81.4982	8.23695	630.952	24.6618	0	2.95269
3891	he_37892	61.545	10.1916	623.028	35.6532	0	3.33958
3881	he_37892	72.6638	10.2594	704.742	54.2317	0	3.27779
3873	he_37964	31.3193	4.21129	5.84604	3.55689	0.00514224	-2.42152
3932	he_38204	80.9598	8.32351	334.618	21.3431	0	2.04724
3922	he_38204	61.051	8.43096	345.843	28.5783	1.11022e-16	2.50203
3912	he_38204	77.8464	7.49853	338.055	27.2297	1.55431e-15	2.11856
3953	he_38247	14407.2	144.668	20270	482.226	0	0.492557
3963	he_38247	15366.4	238.27	19323.1	259.998	0	0.33055
3943	he_38247	15272.8	162.196	21818.6	617.624	0	0.5146
3279	he_38407	1728.22	43.5022	5322.11	83.7268	0	1.62272
3269	he_38407	1607.47	67.642	4668.23	107.982	0	1.53808
3259	he_38407	1780.42	40.8656	4885.31	125.797	0	1.45623
1772	he_38408	41.1404	4.73692	12.1617	3.41705	0.00217195	-1.75821
1792	he_38408	50.1243	8.14092	14.9154	5.42984	0.00759382	-1.7487
2814	he_38409	6245.7	115.178	15138.1	145.094	0	1.27725
2794	he_38409	6638.67	81.0386	14858.9	160.744	0	1.16236
2804	he_38409	5887.86	83.2428	15401.1	191.704	0	1.38722
1296	he_38410	105.979	10.4778	27.7603	9.63714	1.04726e-05	-1.93268
1276	he_38410	100.431	14.0793	28.3842	5.88401	0.000114859	-1.82304
58	he_38575	4475.93	107.834	9741.53	145.732	0	1.12196
38	he_38575	4076.44	112.431	9372.27	277.86	0	1.20109
48	he_38575	4004.65	89.7369	8903.89	279.785	0	1.15276
89	he_38577	1685.16	78.7253	3963.76	98.0003	0	1.23398
79	he_38577	1501.34	60.9392	3539.91	101.373	0	1.23747
69	he_38577	1571.07	93.8589	3770.5	145.537	0	1.263
1063	he_38587	7174.94	88.274	12636.4	221.887	0	0.816549
1083	he_38587	8382.89	177.562	15064.5	234.659	0	0.845634
1073	he_38587	7011.92	101.439	12368.4	243.075	0	0.818772
151	he_38779	551.254	33.2486	124.798	12.9223	0	-2.14312
141	he_38779	469.854	34.4307	114.493	8.17399	0	-2.03696
131	he_38779	448.967	41.6035	103.927	10.8115	8.80407e-14	-2.11104
182	he_38881	1377.22	75.578	48.8815	6.72777	0	-4.81632
172	he_38881	1342.93	97.8712	52.1714	8.26386	0	-4.68598
162	he_38881	981.486	87.6173	37.6496	6.14361	0	-4.70426
306	he_39302	37493.4	253.587	30107.8	331.822	0	-0.316501
296	he_39302	32588.6	361.007	24559.5	391.302	0	-0.408086
286	he_39302	34561.3	194.142	26435.6	519.106	0	-0.386677
337	he_39456	9965.84	256.411	13149.6	190.705	0	0.399951
317	he_39456	9106.42	194.168	11118.7	136.317	2.22045e-16	0.288028
327	he_39456	9038.08	228.338	10833.6	122.321	1.81184e-11	0.261428
2802	he_39499	1	2.78216	79.368	21.9557	0.00348702	6.31048
358	he_39736	4805.35	67.938	3119.59	48.6451	0	-0.623288
348	he_39736	5099.94	120.011	3332.65	71.9501	0	-0.613811
368	he_39736	5370.94	204.186	3791	163.736	1.41521e-09	-0.502598
379	he_39883	33662.7	271.957	26464.6	228.226	0	-0.347086
389	he_39883	32023	404.486	24856	243.97	0	-0.365517
399	he_39883	36209.2	233.183	31873.8	383.11	0	-0.183987
3625	he_4000	33.8922	4.53447	6.5258	3.58085	0.00351043	-2.37673
410	he_40110	22303.1	278.433	21094.5	252.702	0.00100925	-0.080381
430	he_40110	23599.1	147.947	25116.4	436.754	0.00160229	0.0898989
420	he_40110	21023.8	324.404	19950.6	240.468	0.00616675	-0.0755886
461	he_40138	11456.2	202.648	16097.6	206.205	0	0.490713
451	he_40138	10042.1	156.24	12940.9	219.156	0	0.365877
441	he_40138	10490.8	164.17	13248.4	237.549	0	0.336682
482	he_40142	2029.82	34.217	6615.15	142.322	0	1.70442
492	he_40142	2262.49	69.5448	7819.27	211.541	0	1.78912
472	he_40142	1947.98	68.3515	6281.71	168.339	0	1.68918
503	he_40162	8644.68	145.261	16229.9	186.128	0	0.908774
513	he_40162	8238.69	101.916	16043	225.797	0	0.961457
523	he_40162	9151.71	131.01	19805.3	331.546	0	1.11377
544	he_40174	1502.03	53.9655	5078.98	88.5421	0	1.75763
554	he_40174	1687.34	72.4242	5918.23	131.555	0	1.81042
534	he_40174	1500.73	68.2053	4948.5	121.405	0	1.72132
575	he_40343	24773.5	165.67	33338.9	195.011	0	0.428412
585	he_40343	28083.4	184.979	42478	542.061	0	0.596998
565	he_40343	26413.2	270.117	34615.8	392.254	0	0.390171
3458	he_4037	24020.1	260.157	30878.1	359.757	0	0.362341
3468	he_4037	27919.3	221.495	33519.8	317.346	0	0.263752
3448	he_4037	25448.8	269.85	31534.1	437.148	0	0.309316
3636	he_4064	9473.14	153.545	5864.5	90.5854	0	-0.691834
3656	he_4064	10284.3	189.836	6758.69	115.961	0	-0.605631
3646	he_4064	9292.04	114.645	6405.42	191.085	0	-0.536702
606	he_40709	21050.1	262.977	17894.6	271.547	1.11022e-16	-0.234303
596	he_40709	22169.8	470.57	18214.3	171.123	1.9984e-15	-0.283526
616	he_40709	23941.4	192.264	21812.3	424.107	3.4719e-06	-0.134365
637	he_40719	24808.6	164.756	32422.4	318.69	0	0.386149
647	he_40719	28306.9	190.782	41618.8	768.453	0	0.556082
627	he_40719	26157.6	371.59	33652.8	463.921	0	0.363499
668	he_40953	3839.85	51.7075	8739	90.7594	0	1.18642
678	he_40953	4453.12	83.996	10355.3	188.391	0	1.21748
658	he_40953	4067.18	86.4662	8638.25	151.613	0	1.08671
699	he_40976	33.8193	9.31948	105.589	12.6567	0.000397855	1.64255
689	he_40976	47.151	7.13638	96.0349	10.8503	0.00545816	1.02627
346	he_41210	21736.9	278.454	6116.8	260.95	0	-1.8293
366	he_41210	22775.7	556.699	7286.12	270.325	0	-1.64427
356	he_41210	20117.7	454.124	6017.42	358.844	0	-1.74125
740	he_41259	23542.2	147.641	9902.87	205.296	0	-1.24933
730	he_41259	20476.4	163.96	8498.96	152.379	0	-1.2686
720	he_41259	21405.6	268.915	8628.15	130.355	0	-1.31087
761	he_41264	28.2417	9.38871	199.617	18.8175	1.45203e-11	2.82133
751	he_41264	35.9319	6.08493	184.302	18.359	3.7935e-10	2.35874
771	he_41264	51.5992	8.82844	179.351	21.5898	4.73382e-06	1.79737
802	he_41333	2552.44	38.3062	1538.99	65.7896	0	-0.729895
782	he_41333	2317.52	56.613	1349.24	56.5233	0	-0.780438
792	he_41333	2210.37	63.0709	1357.6	37.6351	0	-0.703229
2740	he_41344	14.8832	5.84485	473.628	34.511	0	4.992
2750	he_41344	20.7506	9.20945	394.067	35.6263	0	4.24722
2730	he_41344	33.3219	9.08902	380.331	39.5093	1.45439e-14	3.51272
3453	he_41735	478.291	19.7067	1759.46	41.1202	0	1.87918
3463	he_41735	467.797	29.3675	2061.18	61.4173	0	2.13951
3443	he_41735	530.568	59.6245	2207.12	82.7288	0	2.05655
3966	he_41925	29.7261	3.80326	6.07196	3.70602	0.00780679	-2.29149
75	he_4201	39.7605	7.19986	146.413	9.2186	1.97865e-11	1.88063
65	he_4201	52.7228	8.77827	173.89	15.2032	3.2701e-08	1.72167
85	he_4201	40.2683	8.90844	157.173	16.4774	4.50168e-07	1.96463
2670	he_42176	3581.94	71.2012	2882.82	77.2897	7.09974e-11	-0.313262
2690	he_42176	3311.42	93.3755	2866.29	127.454	0.00429758	-0.208262
947	he_42311	34.315	7.81996	177.139	18.0092	2.71237e-09	2.36797
957	he_42311	48.0868	14.5147	156.284	10.2937	1.12676e-06	1.70046
937	he_42311	38.9715	7.27421	172.954	24.8781	1.1974e-05	2.1499
506	he_42318	1	3.59556	261.491	29.3386	1.4988e-14	8.03062
526	he_42318	16.0724	3.53116	166.767	15.6932	1.23457e-13	3.37518
3499	he_4234	6188.35	76.8748	2471.95	78.6636	0	-1.32391
3489	he_4234	5290.64	100.999	2230.48	59.1333	0	-1.24609
3479	he_4234	5703.6	135.626	2273.13	81.1549	0	-1.32719
2482	he_42549	260.616	16.9289	52.9025	6.82571	0	-2.30052
2492	he_42549	220.608	22.3013	60.2212	12.2928	2.71571e-08	-1.87314
2502	he_42549	201.411	21.0929	54.4319	11.5128	8.35778e-08	-1.88762
3465	he_42966	2370.89	59.868	2899.04	86.32	2.15499e-06	0.290146
3445	he_42966	2467.2	63.8908	2833.23	79.661	0.000826225	0.199574
3556	he_43060	2543.79	79.0648	8734.93	177.28	0	1.77982
3546	he_43060	2418.38	58.0349	7441.86	155.707	0	1.62162
3536	he_43060	2668.53	84.5072	9422.65	329.125	0	1.82009
978	he_43348	19145.9	149.372	20756.2	197.716	3.18998e-10	0.116503
1009	he_43686	24437.8	233.768	26351	408.056	8.58628e-05	0.108744
1019	he_43686	28031.8	145.192	30420.4	614.916	0.000262205	0.117975
1040	he_43853	19512.2	188.622	28913.9	219.437	0	0.567383
1030	he_43853	20804.9	256.14	28843.4	202.886	0	0.471319
1050	he_43853	22748.1	186.206	32237.9	460.146	0	0.503011
1081	he_44379	15901.9	313.986	4981.88	252.503	0	-1.67444
1071	he_44379	13789.7	371.922	4616.24	303.154	0	-1.5788
1061	he_44379	15722.3	473.385	6411.61	251.013	0	-1.29405
2551	he_444	6406.93	89.6697	6994.35	143.44	0.00101515	0.126558
3372	he_44575	7606.38	138.109	11682.4	226.691	0	0.61906
3352	he_44575	7976.41	111.284	10976.8	218.575	0	0.460641
3362	he_44575	7324.3	131.621	9471.17	279.548	1.44417e-11	0.370851
3005	he_44774	34.7611	3.82376	8.50448	3.51325	0.00290435	-2.03118
3112	he_44807	1923.45	47.2537	4147.59	105.553	0	1.10858
3122	he_44807	2016.65	68.2045	4287.11	128.493	0	1.08805
3102	he_44807	2104.44	116.697	4658.03	156.272	0	1.14628
1548	he_4491	398.313	25.5905	172.867	24.3433	4.99262e-09	-1.20424
1538	he_4491	284.718	20.3475	146.85	16.3305	2.65559e-06	-0.955184
1528	he_4491	279.556	19.6189	167.607	15.6139	7.38181e-05	-0.738057
1133	he_44968	21.4981	3.87782	82.2329	11.1886	0.000185349	1.93551
1123	he_44968	30.7438	6.79932	80.0275	12.3658	0.00876455	1.3802
20	he_45012	23149.8	188.609	34875	778.11	0	0.591191
30	he_45012	29025.1	181.633	35528.7	552.119	0	0.291683
10	he_45012	23856.9	252.653	33318.7	900.44	0	0.481921
1154	he_45766	30186.2	254.173	26034.9	266.394	0	-0.213441
1174	he_45766	32796.8	276.851	29359.2	521.715	3.89326e-09	-0.159745
1164	he_45766	28273.9	267.538	26197.1	243.17	7.07658e-09	-0.110062
1236	he_46034	23035.6	183.147	8683.18	141.976	0	-1.40757
1216	he_46034	21603.6	182.078	8783.49	141.386	0	-1.2984
1226	he_46034	19747	148.466	8394.42	148.898	0	-1.23413
3530	he_4609	28215.7	314.358	23808.5	236.836	0	-0.245023
3520	he_4609	24538.8	195.543	22149.5	322.406	1.79942e-10	-0.147787
3510	he_4609	25656.6	364.663	22829.8	353.494	1.80416e-08	-0.168409
1267	he_46242	18261.8	184.714	2304.73	88.9513	0	-2.98616
1257	he_46242	15486.4	177.214	2148.04	65.4536	0	-2.84991
1247	he_46242	16810.8	218.065	2208.19	57.2336	0	-2.92845
1298	he_46408	5525.48	108.383	1021.14	46.8036	0	-2.43593
1288	he_46408	4690.13	110.57	999.635	60.8343	0	-2.23015
1278	he_46408	4899.73	137.835	991.532	64.5983	0	-2.30497
1340	he_46744	58.5942	12.6774	779.314	37.9675	0	3.73338
1360	he_46744	77.8403	7.99254	701.447	33.7291	0	3.17174
1350	he_46744	35.4084	8.48034	767.963	46.1862	0	4.43888
1371	he_46823	26579.5	154.101	30790.5	164.107	0	0.212173
1381	he_46823	24588.8	317.019	29827.9	268.842	0	0.278658
1391	he_46823	29051.4	229.206	31850.6	545.374	4.36408e-06	0.13271
1422	he_47085	33996.5	127.187	29960.4	495.76	2.10942e-15	-0.182329
1402	he_47085	30790.7	281.239	28174.7	357.417	6.27092e-09	-0.128094
1443	he_47213	12544.9	199.744	24576	273.838	0	0.970148
1453	he_47213	14603.2	110.63	25487.5	295	0	0.803503
1433	he_47213	13374.4	141.204	25014.3	428.509	0	0.90328
3582	he_4723	3627.54	81.1122	11386.1	158.921	0	1.65021
3572	he_4723	3796.81	82.0433	11657.2	201.534	0	1.61836
3592	he_4723	4018.54	73.4263	12102.9	226.357	0	1.59061
1484	he_47479	5305.31	127.174	4128.36	167.731	2.20297e-08	-0.361867
1464	he_47479	4841.04	101.712	4330.89	141.339	0.00296279	-0.160653
1495	he_47496	11248.2	104.524	17063.1	188.653	0	0.601179
1505	he_47496	10567.2	184.515	16695.3	210.742	0	0.659858
1515	he_47496	12563	185.288	17141.2	331.026	0	0.448283
1546	he_47498	16311.3	155.964	14981.7	160.048	2.6252e-09	-0.122675
1536	he_47498	13679.7	218.418	14886.4	148.368	1.10336e-05	0.121963
1588	he_47505	14660.4	158.117	23424.3	333.619	0	0.676081
1608	he_47505	16113.9	148.444	23921.1	314.347	0	0.569973
1598	he_47505	13495.4	237.275	22769.3	466.001	0	0.754628
1670	he_47514	6687.9	79.058	3689.53	94.4134	0	-0.858118
1650	he_47514	5953.44	74.1284	3864.02	92.853	0	-0.623621
1660	he_47514	5562.72	146.819	3651.67	83.9806	0	-0.607234
2854	he_47515	5185.93	249.408	3016.37	183.864	2.2089e-12	-0.781792
2874	he_47515	4401.71	246.631	2611.02	193.691	9.13662e-09	-0.753452
2864	he_47515	4365.91	208.039	2870.87	166.719	1.77301e-08	-0.604793
1691	he_47519	18732.7	248.124	27537.8	349.237	0	0.555849
1701	he_47519	22136.9	171.908	29224.4	411.373	0	0.400718
1681	he_47519	20291.8	226.955	27942	623.875	0	0.461537
1732	he_47535	3970.78	111.641	1296.97	67.9433	0	-1.61427
1712	he_47535	3596.17	117.574	1371.39	53.6094	0	-1.39083
1722	he_47535	3296.81	135.525	1200.88	70.7293	0	-1.45697
1753	he_47544	24253.9	410.95	28355.2	316.903	1.02141e-14	0.225397
1743	he_47544	26235.1	172.943	29014.8	653.612	6.87747e-05	0.145291
1763	he_47544	28786.2	273.244	30661.7	512.912	0.00194535	0.0910611
1774	he_47546	24804.6	281.661	28267.3	290.647	1.11022e-16	0.188527
1784	he_47546	22986.8	376.866	27754	424.851	2.22045e-16	0.271889
1794	he_47546	27057.7	266.319	29690.5	389.162	5.64651e-08	0.13396
1805	he_47550	23966.4	197.36	26411.3	164.672	0	0.140138
1815	he_47550	22532.1	391.021	25408.1	415.094	9.51202e-07	0.173302
1836	he_47551	9959.09	137.853	15765.5	210.671	0	0.662686
1846	he_47551	9267.23	99.519	15222.3	303.346	0	0.715978
1856	he_47551	11062.7	151.235	15792.1	220.158	0	0.513492
1887	he_47552	28545.9	257.784	27049.3	352.961	0.000464334	-0.0776954
1908	he_47554	22410.1	282.309	25793.5	373.769	1.71685e-12	0.202856
1898	he_47554	24296.2	309.093	26115.5	236.954	6.26429e-06	0.104174
1939	he_47558	24694.5	371.611	28217.4	491.501	2.48996e-08	0.192395
1929	he_47558	26827	329.091	29158	255.546	5.48401e-08	0.120204
1980	he_47874	36224	226.441	29737.8	523.151	0	-0.284649
1960	he_47874	33423.9	297.363	28823.4	459.211	0	-0.213638
1970	he_47874	30882.5	258.711	27707.7	342.089	9.9476e-14	-0.156506
3935	he_48015	20918.8	190.44	16187.8	245.685	0	-0.369895
3925	he_48015	20198.8	188.109	15513.3	278.837	0	-0.380765
3915	he_48015	20244.2	228.043	15570.7	486.924	0	-0.378675
1803	he_48076	763.594	32.2967	1290.9	56.8974	6.70575e-14	0.757499
1813	he_48076	636.053	46.5245	1268.84	85.2527	7.57481e-10	0.996288
1823	he_48076	754.679	46.7598	1252.37	60.2702	1.08831e-09	0.730726
3321	he_48081	14659.8	62.9932	7513.45	91.0837	0	-0.964313
3331	he_48081	13147.2	92.3411	6874.51	163.777	0	-0.93543
3341	he_48081	13978.6	131.136	8377.11	191.286	0	-0.738694
995	he_4830	1779.95	237.673	1090.24	87.3876	0.00529107	-0.707193
3603	he_4902	264.018	15.6325	61.9497	11.0077	0	-2.09147
3623	he_4902	306.174	31.6659	68.2726	11.2029	1.16543e-10	-2.16497
3613	he_4902	234.506	22.3568	65.0554	10.2758	1.53771e-09	-1.84989
3652	he_4928	34.8973	3.05863	9.28765	4.83643	0.00589325	-1.90973
2063	he_49538	21321.6	328.671	23725.8	410.146	9.28303e-06	0.154143
2053	he_49538	23013.5	286.968	24303.9	257.86	0.00135633	0.078706
1183	he_49594	221.614	13.8823	433.878	21.8073	2.30138e-12	0.969243
1193	he_49594	192.881	32.8754	403.784	28.8093	1.57701e-05	1.06588
1203	he_49594	239.345	19.6322	383.344	24.3889	6.98813e-05	0.67955
3496	he_49596	384.831	24.1442	597.589	33.7446	4.77239e-06	0.634927
3486	he_49596	377.404	31.9722	507.15	20.0037	0.00263972	0.426303
3654	he_4967	28846.7	171.38	9338.81	110.432	0	-1.6271
3644	he_4967	25408.4	162.231	8723.02	237.488	0	-1.54241
3634	he_4967	27048.7	353.169	9163.24	186.34	0	-1.56163
3155	he_49808	1305.33	41.068	1605.86	88.3823	0.00428313	0.298932
1420	he_49836	1657.27	49.8511	5421.02	75.0843	0	1.70975
1410	he_49836	1390.59	50.1623	5923.34	106.942	0	2.09071
1400	he_49836	1694.86	57.7673	5716.89	109.503	0	1.75406
201	he_49840	648.417	29.7562	91.8313	8.19777	0	-2.81986
211	he_49840	705.682	51.3671	87.3268	10.8622	0	-3.01452
191	he_49840	697.578	53.8193	102.619	16.2345	0	-2.76505
3665	he_5002	40.9792	5.65903	10.6152	3.18935	0.00258896	-1.94877
3685	he_5002	37.6692	4.01486	10.8015	4.17588	0.0041884	-1.80215
2104	he_50065	12159.3	195.935	3459.76	113.966	0	-1.81331
2084	he_50065	11425.1	305.017	3792.12	130.07	0	-1.59113
2094	he_50065	10512.3	294.92	3511.71	124.255	0	-1.58184
2430	he_50323	1274.75	73.0617	1590.73	65.843	0.00286712	0.319478
2135	he_50521	25773.3	173.485	10414.9	172.376	0	-1.30724
2115	he_50521	23579.6	269.441	10485.2	185.639	0	-1.16919
2125	he_50521	21693.8	257.03	10222.1	136.548	0	-1.08559
3716	he_5069	341.854	19.1575	653.378	23.8157	0	0.934538
3706	he_5069	346.215	26.8912	674.896	32.1247	1.64169e-12	0.962996
3696	he_5069	341.371	30.6018	648.253	30.2619	1.33053e-10	0.925218
3277	he_50707	7942.81	163.177	12928.3	260.465	0	0.702816
3267	he_50707	7807.82	206.252	11658	160.689	0	0.578326
3257	he_50707	8583.9	140.728	14519	428.772	0	0.758234
3832	he_50723	22670.2	168.476	4633.54	194.223	0	-2.29061
3842	he_50723	24523.2	244.447	4941.84	162.868	0	-2.31103
3822	he_50723	23103.3	276.515	4361.53	94.2026	0	-2.40519
2146	he_50815	23269.2	158.573	10665.4	156.978	0	-1.12548
2166	he_50815	25688.6	157.721	10715.5	272.447	0	-1.26143
2156	he_50815	21876.9	291.001	10103.2	155.943	0	-1.11459
2187	he_51088	2.87741	3.14655	52.9583	11.9211	0.00299066	4.20201
3747	he_5126	17115	187.298	21203.7	169.509	0	0.309055
3737	he_5126	15595.8	142.431	22157.1	436.868	0	0.506609
3727	he_5126	16315.7	110.419	22412.4	515.945	0	0.458037
821	he_51342	2479.69	77.7877	3868.77	129.668	0	0.641716
831	he_51342	2831	94.8451	3871	143.479	6.47785e-09	0.451397
811	he_51342	2866.33	64.3762	3642.95	134.563	6.87409e-07	0.345902
3186	he_51344	852.756	45.1043	1151.63	48.2896	3.17236e-05	0.43347
3176	he_51344	775.396	47.0751	1073.81	53.7775	0.000118336	0.469739
3166	he_51344	908.356	43.434	1119.79	46.2672	0.00245053	0.301896
3778	he_5138	16624.2	161.851	10220.5	177.852	0	-0.701809
3758	he_5138	16096.1	173.893	10603.1	274.894	0	-0.602217
3768	he_5138	14784.3	232.56	10078.3	271.549	0	-0.552822
1162	he_51418	1517.07	49.04	2276.19	38.0754	0	0.585332
1172	he_51418	1727.21	51.9049	2140.6	79.5696	4.69016e-05	0.309571
1152	he_51418	1714.49	67.2472	2220.24	116.067	0.00037739	0.372939
2280	he_51788	8.82409	5.77269	129.419	18.8987	6.41221e-07	3.87446
2290	he_51788	30.6172	6.59149	116.683	13.0652	6.0867e-06	1.93017
2270	he_51788	17.9854	4.14893	126.864	22.9975	0.000105319	2.81839
247	he_51829	86.4232	12.7712	34.2784	9.85614	0.00687043	-1.33412
2352	he_51888	23225	178.153	10030	222.883	0	-1.21136
2342	he_51888	19326.2	167.839	8859.46	165.129	0	-1.12527
2332	he_51888	21068.1	373.299	9546.89	418.65	0	-1.14196
2373	he_51961	18527.3	180.431	33083.9	291.504	0	0.836479
2383	he_51961	21691.5	220.296	38189.7	450.703	0	0.816057
2363	he_51961	20012.7	218.955	33672.3	377.723	0	0.750644
108	he_51983	60.4062	9.4055	171.956	16.3412	1.72016e-06	1.50927
118	he_51983	59.0516	13.6284	185.688	17.3509	1.93114e-06	1.65283
98	he_51983	68.2143	15.3571	163.2	21.0952	0.00225573	1.2585
299	he_52010	41.9391	7.86075	121.369	10.4986	5.45419e-06	1.53303
289	he_52010	56.832	9.31298	127.161	15.3918	0.001948	1.16189
1404	he_52022	449.099	36.5512	854.338	51.2725	2.70534e-09	0.927774
1424	he_52022	612.392	31.6905	952.774	52.1903	2.91715e-07	0.637678
1414	he_52022	453.503	29.0284	816.46	59.2498	3.71212e-07	0.84827
413	he_52065	4.4193	2.71378	70.8163	11.8209	5.77823e-05	4.00219
475	he_52106	8342.68	110.073	7845.59	144.787	0.00540449	-0.0886278
1641	he_5221	399.056	26.8463	38.1048	6.92917	0	-3.38855
1621	he_5221	308.375	19.9021	36.125	8.42951	0	-3.09362
1631	he_5221	263.98	37.0555	30.3719	9.02497	1.54184e-08	-3.11962
2394	he_52245	23755.4	173.122	10577.8	195.552	0	-1.16721
2414	he_52245	25938.6	172.294	11159.6	251.694	0	-1.21681
2404	he_52245	22132.7	187.407	10184.7	203.774	0	-1.11977
2466	he_52701	1808.35	52.0329	442.299	32.6849	0	-2.03158
2456	he_52701	1938.01	70.9551	445.879	47.4586	0	-2.11985
2476	he_52701	2055.3	99.2031	446.963	20.1132	0	-2.20112
1518	he_52722	4338.86	97.8578	275.439	30.9823	0	-3.97751
2487	he_52722	3496.53	93.2929	221.374	29.7531	0	-3.98137
1498	he_52722	3280.07	95.8922	221.185	20.7111	0	-3.8904
2507	he_52722	3873.38	120.003	202.264	17.0025	0	-4.25928
1508	he_52722	3236.57	109.753	201.503	22.3734	0	-4.00559
2497	he_52722	3222.88	214.913	209.811	22.3589	0	-3.94119
3837	he_52751	51.336	6.32365	9.88518	6.45854	0.000976113	-2.37663
3817	he_52751	46.1628	6.01852	11.7963	5.21161	0.00277825	-1.9684
2600	he_52822	63.2941	8.4644	13.6592	5.16103	0.000227613	-2.21219
1487	he_52822	72.1683	11.4903	16.7153	10.2488	0.00295224	-2.1102
2642	he_52854	13028.9	203.849	22352.9	216.526	0	0.778752
2652	he_52854	12187.8	172.438	21672.3	250.535	0	0.830411
2662	he_52854	13998.3	171.716	24837	440.791	0	0.82724
2704	he_52910	32382.5	289.124	30581.3	455.505	0.000623504	-0.0825636
2724	he_52910	35205.6	271.933	37061.1	597.116	0.00684703	0.0741036
2735	he_52927	35604.5	284.217	23519.7	206.217	0	-0.598187
2745	he_52927	33163.6	266.575	23384.8	161.414	0	-0.504031
2755	he_52927	38533	229.327	29173.7	532.833	0	-0.40143
15	he_53032	3583.38	55.3427	6434.96	109.033	0	0.844609
5	he_53032	3834.7	59.6981	7704.7	174.149	0	1.00662
25	he_53032	3946.84	85.743	7349.13	152.331	0	0.896875
2895	he_53034	1655.17	56.8084	4155.44	106.524	0	1.32802
2905	he_53034	1748.61	62.4478	3800.5	101.833	0	1.11998
2885	he_53034	1899.65	69.1041	4179.65	122.51	0	1.13765
3381	he_53035	46.6461	7.60286	10.8909	4.94447	0.00433731	-2.09864
2991	he_531	172.034	17.1259	389.129	27.2696	3.68859e-09	1.17755
2981	he_531	190.92	24.4553	376.183	22.364	1.0206e-06	0.978468
3001	he_531	188.716	24.3178	470.276	46.8562	1.20424e-06	1.31729
2988	he_53109	1473.75	52.0204	1741.9	66.84	0.00352524	0.241168
1472	he_53133	5705.98	127.202	19144.3	284.958	0	1.74637
1462	he_53133	6488.38	77.35	18843	294.716	0	1.5381
1482	he_53133	6576.8	89.5455	18150.1	280.383	0	1.46452
2776	he_53189	27850.3	138.305	38958.5	318.11	0	0.484244
2786	he_53189	32595.6	248.872	49793.5	627.354	0	0.611279
2766	he_53189	30033.1	303.578	39847.8	266.664	0	0.407947
449	he_53589	302.598	19.2577	570.665	38.6916	2.46545e-08	0.915241
459	he_53589	392.85	27.8169	594.843	22.4751	6.38987e-07	0.598531
439	he_53589	360.939	36.6456	565.433	33.163	0.000195969	0.647601
1734	he_5403	179.939	18.6887	46.9826	8.27262	2.73075e-08	-1.93731
1714	he_5403	123.665	11.1573	47.1839	8.49437	1.29209e-05	-1.39007
1724	he_5403	109.793	16.9569	40.8319	9.50556	0.00225155	-1.42701
3840	he_5651	8975.64	61.6896	5408.9	101.11	0	-0.73068
3830	he_5651	8349.06	105.813	5522.84	169.518	0	-0.596203
3820	he_5651	8627.39	171.682	5667.81	207.005	0	-0.606132
633	he_5727	2594.51	48.3998	9087.53	137.094	0	1.80842
643	he_5727	2612.1	105.065	9110.98	153.43	0	1.8024
623	he_5727	2787.82	93.5874	9838.83	181.491	0	1.81935
2993	he_593	80.8664	13.6543	1321.52	40.3295	0	4.03051
3003	he_593	106.441	14.2776	1446.27	55.4912	0	3.76421
2983	he_593	83.5462	14.6339	1354.98	72.3151	0	4.01956
3024	he_596	24.8657	6.41912	419.949	29.654	0	4.07798
3034	he_596	39.4157	9.187	452.027	32.0089	0	3.51956
3014	he_596	30.3597	9.14855	409.974	32.0993	0	3.7553
3055	he_598	23.9971	6.42159	247.207	20.6413	0	3.36479
3065	he_598	35.6264	7.82721	258.579	23.8169	3.59712e-14	2.85958
3045	he_598	34.2896	12.1758	228.822	28.4464	4.56125e-08	2.73838
3871	he_6041	41790.2	225.598	36102.4	572.391	0	-0.21107
3913	he_6656	29.6511	5.1055	4.62261	2.61388	0.00714421	-2.6813
3933	he_6656	24.7062	3.24163	2.15001	3.54783	0.0073173	-3.52246
3964	he_6808	41.711	4.40898	8.62947	4.3347	0.00075019	-2.27309
3944	he_6808	40.3509	5.41357	9.52833	3.62542	0.00227984	-2.08231
3497	he_6831	944.269	58.4413	2371.87	66.5796	0	1.32876
3487	he_6831	867.491	53.4338	1897.03	55.9967	0	1.12882
3477	he_6831	960.621	42.6352	2097.52	84.629	0	1.12665
2268	he_6836	703.384	27.9984	1840.6	56.0845	0	1.38779
2278	he_6836	608.164	36.4524	1844.52	61.2883	0	1.60071
2288	he_6836	694.556	26.8327	1729.26	76.7808	0	1.31599
2536	he_6841	69.3266	10.8549	11.338	4.68284	0.000155062	-2.61225
2516	he_6841	74.9136	13.6458	13.4181	6.73153	0.000916558	-2.48105
2526	he_6841	66.9454	9.10887	20.4452	6.11657	0.00127109	-1.71122
2588	he_6842	3833.99	65.1523	8880.6	192.465	0	1.21181
2578	he_6842	4238.18	75.6936	8712.73	189.86	0	1.03968
2598	he_6842	4127.45	121.511	8607.89	196.731	0	1.06041
59	he_7041	30776.6	226.054	40020.4	242.191	0	0.378902
49	he_7041	26411.5	238.933	41225.9	990.965	0	0.642385
39	he_7041	26986.2	261.827	42719	1384.64	0	0.662657
90	he_7043	21553.3	179.756	20378.8	236.555	6.11669e-05	-0.0808406
132	he_7253	2816.85	78.9761	1571.25	70.7323	0	-0.842165
142	he_7253	2732.03	101.711	1503.89	48.0943	0	-0.861274
152	he_7253	3045.96	100.653	1726.56	88.8031	0	-0.819
183	he_7363	20222.4	145.363	8711.85	147.103	0	-1.2149
173	he_7363	17502.9	162.82	7471.95	135.063	0	-1.22804
163	he_7363	18253.1	243.965	7603.88	113.885	0	-1.26333
3908	he_7822	58.1401	7.66357	20.1929	7.75604	0.00778858	-1.52569
214	he_8109	417.596	21.274	177.156	20.6498	3.79807e-13	-1.23709
204	he_8109	317.416	25.6148	151.41	14.2764	3.48012e-07	-1.06792
194	he_8109	307.3	24.0341	143.666	19.1	1.37188e-06	-1.09693
245	he_8209	1130.2	53.3738	370.689	27.4557	0	-1.60829
225	he_8209	880.783	46.3857	276.853	19.0069	0	-1.66967
235	he_8209	937.493	76.8623	316.544	29.746	2.95874e-13	-1.5664
276	he_8520	29439.1	221.754	28132.4	409.785	0.0038794	-0.0655007
266	he_8520	25283.9	162.337	24268	372.601	0.00980869	-0.059165
297	he_8569	42.5827	7.01078	121.753	13.2813	4.78031e-05	1.51562
349	he_8774	1081.31	64.8829	422.274	27.683	0	-1.35653
359	he_8774	1037.73	69.8176	449.913	25.0211	2.32037e-14	-1.20571
369	he_8774	1282.41	87.9188	542.641	41.1382	1.08691e-13	-1.24078
400	he_8776	32269.5	456.736	45774	592.743	0	0.504357
380	he_8776	28476.2	256.536	38758.6	590.878	0	0.44476
390	he_8776	27858	187.765	37230.8	586.944	0	0.418404
431	he_8778	28183.3	314.068	49303.6	397.315	0	0.80685
411	he_8778	25324.2	224.436	39466.6	380.963	0	0.640115
421	he_8778	24824.8	210.733	38735.7	440.245	0	0.641883
442	he_8779	18873.4	150.754	17872.7	259.254	0.000672364	-0.0786034
452	he_8779	18580.1	260.756	17547.1	241.912	0.00288971	-0.0825249
2154	he_9049	11249.4	115.192	14278.9	167.463	0	0.344036
2144	he_9049	12673.9	137.583	14190.1	256.323	4.77548e-07	0.163028
2164	he_9049	12670.3	153.881	13912.7	302.002	0.000437633	0.134952
3753	he_9058	914.506	46.1766	469.442	24.9655	1.33227e-15	-0.962046
3773	he_9058	792.884	45.1069	408.388	24.1652	1.42253e-12	-0.95717
3763	he_9058	775.147	63.5867	395.741	23.7453	7.08472e-08	-0.969914
1088	he_9059	887.077	51.8046	446.191	46.0249	9.01935e-10	-0.991397
1098	he_9059	808.981	32.6353	487.633	37.3051	9.88121e-10	-0.73031
1108	he_9059	853.633	41.2842	486.019	51.8507	9.23347e-08	-0.812602
2371	he_9068	3345.4	66.278	5228.54	120.6	0	0.644229
2381	he_9068	3732.98	56.2019	5008.96	80.9749	0	0.424182
2361	he_9068	3765.68	110.042	5213.75	124.44	0	0.469411
576	he_9090	542.787	16.8431	2292.16	59.5892	0	2.07825
586	he_9090	666.506	35.6422	2787.11	83.2737	0	2.06408
566	he_9090	579.727	45.5238	2303.22	79.2236	0	1.9902
719	he_9307	217.678	18.3259	87.9239	10.3583	1.18229e-07	-1.30787
739	he_9307	213.184	25.8734	92.984	12.5187	0.000154824	-1.19705
729	he_9307	167.537	14.1516	93.1243	11.8881	0.000617895	-0.847249
607	he_9463	140.667	19.9375	6275.2	82.7859	0	5.47931
597	he_9463	154.303	13.2228	6487.91	112.205	0	5.39391
617	he_9463	182.434	9.63044	7749.82	139.036	0	5.40872
638	he_9626	3.69563	4.39709	39.3612	8.07267	0.00915947	3.41288
690	he_9634	33659.9	267.988	14762.3	192.163	0	-1.18912
700	he_9634	33193.5	274.757	14858.4	223.856	0	-1.15962
710	he_9634	38143.1	333.676	18750.8	287.665	0	-1.02447
741	he_9638	107.884	11.884	19.8342	4.3146	6.22406e-08	-2.44342
721	he_9638	67.6045	7.37732	19.5584	5.59922	0.000182101	-1.78933
731	he_9638	61.4923	7.06169	19.4604	5.33377	0.000699309	-1.65986
752	he_9646	32221.9	181.521	26216.7	250.417	0	-0.297557
762	he_9646	31719.1	230.248	26436.1	355.298	0	-0.262841
772	he_9646	35970.2	390.27	33016.4	482.528	1.32171e-06	-0.123621
106	he_9720	2.62931	5.38262	3312.51	97.1054	0	10.299
96	he_9720	16.9408	7.76958	3353.33	113.79	0	7.62894
116	he_9720	4.93617	6.53911	3358.87	147.996	0	9.41037
783	he_9721	53.1387	5.15684	5703.38	93.1304	0	6.74591
793	he_9721	47.1719	16.4614	5721.13	106.694	0	6.92223
803	he_9721	77.4193	13.3712	6524.47	168.499	0	6.39702
834	he_9772	1666.14	72.3627	4238.55	77.5384	0	1.34706
824	he_9772	1425.5	43.782	3690.1	86.4721	0	1.37219
814	he_9772	1478.85	34.4015	3831.07	97.1716	0	1.37327
865	he_9775	6168.12	73.8198	4836.42	131.697	0	-0.35089
845	he_9775	5432.72	145.608	4231.47	124.324	3.99913e-10	-0.360516
855	he_9775	5412.36	156.9	4228.1	180.252	6.29534e-07	-0.35625
876	he_9776	2358.92	44.2722	1605.23	47.6909	0	-0.55535
886	he_9776	2438.32	67.6711	1596.73	48.1319	0	-0.610773
896	he_9776	2721.66	70.4235	1836.24	67.1754	0	-0.567727
3107	he_981	105.911	14.0846	4956.27	55.9398	0	5.54833
3127	he_981	118.31	7.07663	5721.29	123.828	0	5.5957
3117	he_981	107.12	14.9298	4791.96	104.737	0	5.48332
778	he_9859	1115.62	38.5779	674.772	52.6266	9.34894e-11	-0.725376
798	he_9859	1008.24	39.2561	664.522	53.2914	5.52196e-07	-0.601451
788	he_9859	989.41	29.9218	714.798	44.2298	9.83185e-07	-0.469032
829	he_9860	212.489	18.4164	127.804	12.5976	0.000865229	-0.733459
907	he_9882	23398.2	133.534	9895.36	138.839	0	-1.24157
927	he_9882	26629	197.2	11441.4	188.035	0	-1.21873
917	he_9882	23124.8	205.715	9715.75	163.501	0	-1.25105
3784	he_9904	30.2465	4.57144	3.29326	4.86527	0.00822649	-3.19918
3534	rt_chr1_A_1_host	30.6127	3.05034	4.4952	5.55034	0.00814838	-2.76767
3462	rt_chr1_C_1	63.2849	7.29296	12.0001	5.76686	6.97388e-05	-2.39882
3596	rt_chr2_D_3	38.7282	3.65215	3.20373	4.94132	0.000289093	-3.59556
3566	rt_chr2_D_3	35.813	4.05006	3.84839	4.23532	0.000767965	-3.21816
3380	TU100,TU232	62.1078	7.14566	20.557	7.68797	0.00285883	-1.59514
3410	TU100,TU232	62.2481	8.15785	23.9733	6.14178	0.00496911	-1.3766
2107	TU126_1	195.379	23.3917	35.9676	7.26617	1.12574e-08	-2.44151
2087	TU126_1	140.82	15.3625	31.2403	12.1802	1.95251e-06	-2.17237
2097	TU126_1	139.211	20.2913	30.744	7.98764	1.57766e-05	-2.1789
2448	TU206	454.45	32.5866	62.3072	12.2315	0	-2.86665
2428	TU206	331.23	26.9074	48.7822	9.539	0	-2.76341
2438	TU206	292.916	25.3288	42.8643	15.7798	6.10623e-14	-2.77264
3037	TU285	2556.27	76.7316	1217.62	27.4027	0	-1.06998
3017	TU285	1950.93	57.6079	1002.02	39.3658	0	-0.961253
3027	TU285	1918.24	75.244	976.074	35.7612	0	-0.974723
3192	TU315	2343.96	45.5614	306.149	20.4084	0	-2.93664
3182	TU315	1867.28	43.6357	288.765	24.7786	0	-2.69297
3172	TU315	1953.06	68.8694	314.4	26.985	0	-2.63506
3254	TU327	249.945	15.969	46.8312	7.21451	0	-2.41607
3234	TU327	199.024	18.8847	36.1268	5.75643	2.92322e-12	-2.4618
3244	TU327	186.557	18.3929	37.6209	10.6494	1.79376e-09	-2.31001
3285	TU357	30.2886	4.67473	4.77004	3.87773	0.0080049	-2.6667
3327	TU371	1117.7	27.2281	94.7545	9.30073	0	-3.56019
3347	TU371	1365.75	53.8143	115.749	14.4526	0	-3.56063
3337	TU371	1076.45	61.7435	94.1863	11.6432	0	-3.51462
3750	TU43	50.9805	4.58175	17.2341	7.36538	0.00544676	-1.56468
3595	TU431	41.0037	4.96032	10.5302	4.04095	0.00228235	-1.96122
3626	TU433	49.5042	8.60624	11.7159	6.94293	0.00868315	-2.07908
3657	TU442	39.0144	4.8871	8.4953	5.84347	0.00606164	-2.19927
3688	TU448	80.0114	5.86559	36.6271	8.52967	0.00169141	-1.12729
3719	TU452	310.747	20.7599	172.231	24.1651	7.04098e-05	-0.8514
3699	TU452	236.051	27.647	120.959	5.18809	0.000220513	-0.964588
3709	TU452	216.918	27.4284	122.669	15.9083	0.00596253	-0.822381
3843	TU481	29.9957	4.74627	3.16384	3.36967	0.00434362	-3.24501
3905	TU499	38.2107	4.86978	5.58847	7.42559	0.0080756	-2.77345
3936	TU500	40.8186	5.30252	11.8811	4.42706	0.00558426	-1.78056
899	TU56	22607.3	172.84	10725	163.193	0	-1.07581
879	TU56	18360	150.988	9854.32	188.83	0	-0.897739
869	TU56	20774.6	278.549	11474.8	282.731	0	-0.856352
910	TU600	794.846	29.6943	223.099	24.6178	0	-1.83299
900	TU600	916.333	56.0251	194.68	19.6109	0	-2.23477
930	TU600	1066.29	82.6332	242.757	16.7668	0	-2.13502
2976	TU757	194.035	13.667	27.6894	7.90718	0	-2.80892
2956	TU757	138.774	14.3599	22.6196	5.47777	9.4627e-10	-2.61709
2946	TU757	173.975	19.1237	25.3407	10.727	4.91344e-09	-2.77935
3379	TU79	1360.88	36.9757	288.174	15.2193	0	-2.23952
3359	TU79	1156.28	45.1726	232.433	21.9619	0	-2.3146
3349	TU79	1300.92	83.6849	270.149	23.2851	0	-2.2677
3503	TU831	39.0342	4.46234	7.82364	4.64515	0.00187437	-2.31883
1180	xbz_1041	6116.3	400.701	36.7702	8.53417	0	-7.37798
1200	xbz_1041	6244.62	469.275	32.8049	8.62258	0	-7.57256
1190	xbz_1041	5647.24	442.174	43.3375	11.27	0	-7.02579
1390	xbz_10910	132.152	18.9431	32.3887	7.87542	2.86236e-05	-2.02863
1370	xbz_10910	98.098	13.171	31.9903	8.72612	0.000552995	-1.61659
3754	xbz_10955	35.7745	4.67142	7.75363	4.97626	0.00679867	-2.20599
1438	xbz_10964	442.472	21.3435	690.86	39.8101	7.4458e-07	0.642808
1448	xbz_10964	458.331	28.6767	616.199	31.0854	0.000944064	0.427006
3650	xbz_11018	978.144	42.5419	489.647	36.4985	1.11022e-16	-0.998304
3640	xbz_11018	1001.1	67.7754	441.221	21.0935	3.4972e-14	-1.18201
3630	xbz_11018	1074.76	59.6977	507.398	52.9529	5.93281e-12	-1.08283
541	xbz_11034	7028.95	113.364	17815.2	153.859	0	1.34172
551	xbz_11034	7477.27	77.0322	19445.5	255.087	0	1.37885
531	xbz_11034	8005.73	109.062	20466.9	389.694	0	1.35419
1411	xbz_11316	10764.6	185.314	20321.6	142.157	0	0.916722
1421	xbz_11316	12878.7	103.644	20295.9	258.754	0	0.656203
1401	xbz_11316	11827.1	275.449	20471.5	209.367	0	0.791522
376	xbz_11369	583.381	27.1224	425.468	28.0721	0.000156584	-0.455387
128	xbz_11688	856.791	39.7907	192.097	25.2452	0	-2.15711
148	xbz_11688	784.506	37.6274	172.388	22.1237	0	-2.18613
138	xbz_11688	703.926	43.146	171.176	16.7444	0	-2.03994
634	xbz_11720	6540.53	148.657	8119.3	137.886	5.05151e-14	0.311949
644	xbz_11720	6976.42	152.012	8332.74	131.802	7.79736e-11	0.256305
624	xbz_11720	7465.97	112.279	8700.25	246.052	1.12865e-05	0.220727
1614	xbz_11894	1756.22	44.6193	4482.06	123.823	0	1.35169
1624	xbz_11894	1552.93	75.6225	4880.96	217.476	0	1.65217
1634	xbz_11894	1710.91	48.4538	4674.02	235.262	0	1.4499
737	xbz_1241	282.326	15.1848	132.322	15.1505	1.8356e-09	-1.09331
717	xbz_1241	311.686	24.1824	129.516	12.2884	2.39513e-09	-1.26697
727	xbz_1241	256.763	27.2971	148.848	20.4084	0.00323882	-0.7866
3439	xbz_12421	19.7945	1.61753	1.84325	2.75275	0.00882191	-3.42478
24	xbz_12548	35114	443.512	6827.65	210.975	0	-2.36259
14	xbz_12548	32362.5	402.421	6292.08	299.396	0	-2.36271
4	xbz_12548	36851.4	685.153	6906.23	111.052	0	-2.41575
3743	xbz_12775	11399.4	129.093	2522.07	61.7098	0	-2.17627
3723	xbz_12775	11656.5	192.857	2513.11	125.176	0	-2.21359
3733	xbz_12775	10867.7	266.768	2181.89	86.2471	0	-2.31639
1442	xbz_12781	21786.9	267.604	25467.3	363.583	1.55431e-15	0.225191
2308	xbz_13680	1257.71	63.6684	2621.6	68.9162	0	1.05965
2298	xbz_13680	1445.46	38.2654	2506.08	66.8528	0	0.793898
2318	xbz_13680	1423.75	54.0393	2456	94.7869	0	0.786619
706	xbz_13753	7134.51	148.619	21418.3	256.747	0	1.58596
686	xbz_13753	7584.1	83.1024	21778.4	299.227	0	1.52185
696	xbz_13753	6636.51	159.352	20734.9	365.291	0	1.64356
1719	xbz_13754	5332.73	106.718	17769.1	232.846	0	1.73642
1709	xbz_13754	6123.68	63.3939	17017.8	222.88	0	1.47457
1729	xbz_13754	5926.24	125.339	16605.4	227.232	0	1.48646
1459	xbz_13756	6326.94	98.3265	18161	369.417	0	1.52126
1479	xbz_13756	5877.06	191.483	17983.9	408.691	0	1.61354
1469	xbz_13756	5492.68	222.591	19420.5	501.651	0	1.822
2339	xbz_13760	122.033	11.4804	43.5217	5.27057	1.29509e-06	-1.48746
2329	xbz_13760	124.047	12.8825	43.6577	10.1087	4.87697e-05	-1.50658
2349	xbz_13760	130.78	16.4631	45.5465	13.1625	0.000444772	-1.52173
1213	xbz_13761	5860.83	78.1791	12192.5	144.02	0	1.05682
1223	xbz_13761	5117.09	135.051	12928	160.976	0	1.3371
1233	xbz_13761	5605.93	82.6114	12012.2	217.4	0	1.09947
954	xbz_13762	117.155	7.95337	36.4529	7.89691	5.64316e-08	-1.68431
934	xbz_13762	119.692	15.603	32.6214	7.91046	3.09051e-05	-1.87543
944	xbz_13762	118.994	20.8112	43.1722	8.09284	0.00277356	-1.46271
1130	xbz_13763	1163.27	34.5686	4460.29	98.818	0	1.93895
1140	xbz_13763	1278.84	50.6733	4112.26	96.9728	0	1.6851
1120	xbz_13763	1364.54	51.9933	4191.94	123.924	0	1.6192
1035	xbz_13765	1480.84	44.4367	4089.67	68.8344	0	1.46557
1045	xbz_13765	1542.97	45.5069	3812.37	96.6172	0	1.30498
1025	xbz_13765	1680.95	45.5335	3920.12	135.37	0	1.22162
3950	xbz_13911	1009.75	39.705	1653.1	88.7409	4.05344e-10	0.711172
3960	xbz_13911	1035.44	52.4594	1567.7	67.8318	5.66054e-09	0.5984
3940	xbz_13911	1053.63	46.2373	1655.31	93.7748	5.38498e-08	0.651739
1735	xbz_14049	18950.2	99.4717	31718.8	277.523	0	0.743125
1715	xbz_14049	15005.8	140.654	28234.8	283.674	0	0.911952
1725	xbz_14049	14897.7	165.971	26029.9	313.007	0	0.805073
1901	xbz_14050	320.781	15.7813	73.9132	6.48222	0	-2.11769
1921	xbz_14050	433.285	32.8022	78.7997	11.9074	0	-2.45905
1911	xbz_14050	305.583	32.7052	57.0772	12.5394	9.04438e-11	-2.42058
1890	xbz_14070	632.057	39.6906	147.548	17.4202	0	-2.09887
1870	xbz_14070	470.692	27.2592	150.882	13.7552	0	-1.64136
1880	xbz_14070	457.312	42.6566	118.392	23.7674	6.67648e-11	-1.9496
1756	xbz_14076	30029.3	179.799	14614.3	150.823	0	-1.03899
1766	xbz_14076	38119.6	324.111	18050	193.375	0	-1.07854
1746	xbz_14076	30960.8	240.019	15844.4	198.13	0	-0.966471
1483	xbz_14113	7359.01	358.924	291.159	25.7243	0	-4.65963
1463	xbz_14113	5523.66	412.323	233.774	23.2889	0	-4.56244
1473	xbz_14113	5536.06	461.522	247.005	38.8821	0	-4.48624
1514	xbz_14128	23490.4	175.443	5290.13	103.705	0	-2.1507
1494	xbz_14128	22008.4	349.292	5660.34	121.416	0	-1.95909
1504	xbz_14128	19719.6	317.231	5439.28	93.4558	0	-1.85815
1797	xbz_14129	13713.4	140.172	3491.46	79.0703	0	-1.97368
1777	xbz_14129	10948.1	99.6654	3053.86	74.7649	0	-1.84198
1787	xbz_14129	10758.8	107.018	2882.24	129.205	0	-1.90026
1828	xbz_14130	10565.2	121.705	4135.97	137.837	0	-1.35302
1808	xbz_14130	8580.01	104.701	3658.79	111.867	0	-1.22961
1818	xbz_14130	8402.51	90.9622	3491.54	123.327	0	-1.26696
1952	xbz_14154	2372.94	86.9256	1675.05	74.2197	1.87205e-09	-0.502469
1942	xbz_14154	1776.81	66.8016	1343.26	49.6111	3.75244e-07	-0.403559
1932	xbz_14154	1841.24	83.2882	1512.09	78.9272	0.00397752	-0.284133
3501	xbz_14172	26.5701	3.6946	4.08614	2.45314	0.005315	-2.70099
1545	xbz_14675	39148.4	225.772	25476.2	380.712	0	-0.619805
1525	xbz_14675	37151.4	429.471	24397.3	344.743	0	-0.606696
1535	xbz_14675	33159	330.737	24381.2	523.265	0	-0.443629
3175	xbz_14983	8204.07	123.206	24404.5	284.013	0	1.57273
3185	xbz_14983	8427.89	112.895	28025	504.045	0	1.73347
3165	xbz_14983	8951.88	151.133	28373.7	752.911	0	1.66429
3061	xbz_15227	5052.21	114.398	2850.86	108.811	0	-0.825515
3041	xbz_15227	5294.03	168.888	2719.74	126.969	0	-0.960899
3051	xbz_15227	4800.17	153.551	2664.12	109.277	0	-0.849427
853	xbz_15625	29970.7	113.179	21301.3	208.329	0	-0.492614
863	xbz_15625	34727.8	156.83	24043.6	383.811	0	-0.53044
843	xbz_15625	32940.2	458.365	21487.2	219.044	0	-0.616371
2028	xbz_15821	24.5767	9.63287	312.521	33.693	3.41727e-13	3.66859
2038	xbz_15821	36.8491	10.7067	279.543	33.8947	1.56674e-09	2.92337
2018	xbz_15821	33.6453	9.54175	278.458	38.1416	2.84443e-08	3.04899
1367	xbz_15823	14.4494	4.9688	205.756	17.567	0	3.83185
1377	xbz_15823	10.7947	7.81214	242.545	22.5429	2.22045e-16	4.48985
1387	xbz_15823	7.15589	5.43383	270.706	37.6914	7.14439e-10	5.24145
874	xbz_15847	33737.1	497.446	26189	259.023	0	-0.365374
894	xbz_15847	35224.8	278.273	29270.6	464.456	0	-0.267136
884	xbz_15847	30741.3	155.658	26530.1	378.989	0	-0.212548
1004	xbz_16233	8060.07	137.951	26597.3	157.467	0	1.72242
1014	xbz_16233	8310.77	207.449	24827.3	259.995	0	1.57887
994	xbz_16233	9040.78	173.639	27593	437.099	0	1.60978
1625	xbz_16514	727.87	47.322	1201.7	60.3491	7.99305e-09	0.723322
1635	xbz_16514	751.033	37.3633	1116.39	54.4236	3.14121e-07	0.571892
1615	xbz_16514	756.736	38.4262	1064.25	51.7719	1.14881e-05	0.491979
2741	xbz_16788	146.563	11.6827	280.037	20.0935	1.58024e-06	0.934101
915	xbz_17038	24918.2	273.017	26443.6	166.631	4.14977e-06	0.0857153
1242	xbz_1728	4541.19	79.9338	8440.76	173.813	0	0.894303
1262	xbz_1728	4207.58	132.329	8385.42	199.208	0	0.994893
1252	xbz_1728	4003.18	124.554	9048.3	282.539	0	1.1765
3330	xbz_17454	7552.2	126.146	19840.1	214.207	0	1.39345
3340	xbz_17454	7603.59	187.71	23526.7	491.659	0	1.62954
3320	xbz_17454	8093.77	99.6135	23495.3	629.282	0	1.53749
2214	xbz_18521	34.33	15.6089	349.743	18.9558	0	3.34875
2224	xbz_18521	33.2492	14.1904	313.386	27.5899	2.77556e-15	3.23655
2204	xbz_18521	46.7902	14.2017	295.334	35.836	9.41295e-09	2.65807
1946	xbz_19	40625.6	244.164	15023.2	253.691	0	-1.4352
1926	xbz_19	42366.7	376.78	15194.1	331.707	0	-1.47942
1936	xbz_19	36706.3	317.822	16070.8	423.221	0	-1.19158
1873	xbz_19721	554.673	33.8566	126.052	12.9847	0	-2.13762
1863	xbz_19721	577.533	43.1594	108.208	15.6588	0	-2.4161
1883	xbz_19721	580.124	40.5388	128.614	20.8707	0	-2.17332
3134	xbz_20069	389.368	33.7847	248.675	20.2686	0.000801322	-0.646874
3144	xbz_20069	347.244	24.5252	246.753	19.9008	0.00333843	-0.492884
3154	xbz_20069	364.268	31.5945	257.719	19.0344	0.00660845	-0.499199
611	xbz_20219	5049.09	141.183	917.779	52.3043	0	-2.4598
601	xbz_20219	4850.14	142.942	905.728	55.7927	0	-2.42088
591	xbz_20219	5189.57	203.433	959.315	67.5162	0	-2.43554
446	xbz_20511	5700.2	71.2443	10575.8	109.158	0	0.891687
436	xbz_20511	6293.8	53.9388	13531.3	213.12	0	1.1043
456	xbz_20511	5919.42	153.817	11022.8	179.055	0	0.896959
2121	xbz_21085	1325.94	72.793	4907.54	158.418	0	1.88798
2131	xbz_21085	1396.56	89.0219	4381.5	120.046	0	1.64954
2111	xbz_21085	1436.73	52.3	4464.58	154.106	0	1.63574
3423	xbz_21087	7364	155.927	15020.6	208.326	0	1.02838
3433	xbz_21087	7675.34	105.138	18016.3	419.34	0	1.231
3413	xbz_21087	7894.55	96.3808	18629.8	505.424	0	1.23868
2255	xbz_21088	65.7323	11.1901	17.9313	9.39427	0.0073215	-1.87412
2235	xbz_21088	67.2359	13.0658	18.3883	8.69579	0.00951374	-1.87044
1159	xbz_2177	52.6889	7.95244	184.268	21.9033	2.35181e-06	1.80623
1149	xbz_2177	68.7177	8.76584	149.773	15.8666	0.00036537	1.12402
1169	xbz_2177	49.4114	13.1527	166.677	29.9816	0.0020092	1.75414
936	xbz_21862	34004.2	388.75	26660.2	258.32	0	-0.351027
956	xbz_21862	35650.9	213.083	29690.1	395.023	0	-0.263954
946	xbz_21862	30910.3	265.087	27251.4	322.16	0	-0.181756
1904	xbz_22723	4025.16	124.014	6495.38	186.259	0	0.690368
1914	xbz_22723	4369.09	96.5047	6030.12	218.213	1.5714e-11	0.464854
1894	xbz_22723	4433.49	168.587	5768.52	185.563	2.81605e-07	0.379757
74	xbz_22825	431.701	26.5718	2038.52	48.4308	0	2.23942
84	xbz_22825	429.833	42.2129	2190.08	54.3881	0	2.34914
64	xbz_22825	439.997	41.1452	2180.53	74.712	0	2.30911
3888	xbz_2283	140.777	7.2344	87.5483	12.7939	0.0030676	-0.685265
2979	xbz_23097	3671.1	115.25	2903.37	75.5136	3.32344e-08	-0.338486
2999	xbz_23097	3485.54	125.075	2918.98	85.0339	0.000171568	-0.25592
2617	xbz_23504	1795.61	41.4067	2499.43	103.629	2.17526e-09	0.477123
2627	xbz_23504	1877.53	59.5763	2191.1	78.6468	0.00319037	0.222822
549	xbz_23536	2072.8	85.0774	7295.82	139.093	0	1.81549
529	xbz_23536	2202.5	88.1094	8619.67	236.443	0	1.96849
539	xbz_23536	1975.27	66.4286	7328.79	223.93	0	1.89153
977	xbz_23915	24122.6	156.577	26327.6	276.206	1.45198e-11	0.126192
1315	xbz_24446	6185.88	84.276	10509.1	175.45	0	0.764586
1325	xbz_24446	6474.99	124.444	9644.79	136.701	0	0.574872
1305	xbz_24446	6961.08	120.57	9568.82	178.525	0	0.459029
913	xbz_250	145.786	23.2251	439.874	32.1441	3.20988e-11	1.59324
923	xbz_250	156.761	14.4101	421.335	34.4951	3.10683e-10	1.4264
903	xbz_250	160.662	14.1334	418.549	37.3729	8.10994e-09	1.38137
828	xbz_25639	5001.65	122.401	3413.23	69.7436	0	-0.551264
808	xbz_25639	5358.58	163.582	3539.41	58.9345	0	-0.598342
818	xbz_25639	4801.78	100.824	3559.62	126.505	2.90878e-14	-0.431848
1008	xbz_25897	12483.3	135.701	23795.5	235.313	0	0.930686
1018	xbz_25897	14458.6	118.628	25159.4	335.453	0	0.799169
998	xbz_25897	13724.7	245.248	23285.6	245.364	0	0.762661
1039	xbz_26076	10704.8	131.368	16452	263.401	0	0.620006
1049	xbz_26076	12508.3	121.974	16860.3	194.431	0	0.430747
1029	xbz_26076	11704.2	240.983	15893.8	119.671	0	0.44144
673	xbz_26095	6642.16	205.97	5355.91	244.944	4.56163e-05	-0.31052
653	xbz_26095	7097.29	202.142	6164.95	200.741	0.000853293	-0.203181
663	xbz_26095	6535.73	222.391	5493.78	245.225	0.00129429	-0.25055
1070	xbz_26118	24768.8	258.583	27329.5	279.04	5.56564e-11	0.141937
1080	xbz_26118	28686.4	152.875	30150.9	463.701	0.00412539	0.0718338
1101	xbz_26123	23406.5	310.338	24996	381.179	0.00192846	0.0947895
1091	xbz_26123	25936.6	446.359	24633.2	227.484	0.00718339	-0.0743841
1142	xbz_26125	28866.5	125.586	26575.6	590.664	0.000106202	-0.119293
1163	xbz_26127	22755.1	178.456	25051.9	224.992	7.10543e-15	0.13873
2276	xbz_26373	623.393	39.0959	1321.95	73.5193	2.77556e-15	1.08446
2266	xbz_26373	687.546	42.2716	1090.22	47.8626	5.50053e-09	0.665093
2286	xbz_26373	683.799	32.3631	1127.95	63.6668	7.22448e-09	0.722052
1903	xbz_2650	7991.81	238.097	9238.37	223.299	0.000246191	0.209117
291	xbz_27054	11547.6	137.102	6964.11	68.8569	0	-0.729583
301	xbz_27054	11748.7	113.866	7441.43	114.894	0	-0.658849
281	xbz_27054	12684.2	166.712	9348.31	175.095	0	-0.440257
2079	xbz_2724	417.744	22.4506	27.2456	7.25623	0	-3.93852
2099	xbz_2724	508.77	39.9659	38.7138	9.24698	0	-3.7161
2089	xbz_2724	504.079	37.7118	49.1664	12.0836	0	-3.35791
353	xbz_27253	63.4007	7.95396	23.715	5.88255	0.00294843	-1.4187
343	xbz_27253	77.6496	14.1324	24.5616	7.64861	0.00581011	-1.66058
2803	xbz_27255	225.271	20.104	417.888	31.75	5.87914e-06	0.891454
2813	xbz_27255	207.119	32.6896	374.85	33.4076	0.00136606	0.855855
2793	xbz_27255	232.515	32.1822	367.428	26.7924	0.00455544	0.66014
3526	xbz_27257	382.752	21.517	583.147	41.1054	0.000107476	0.607449
3506	xbz_27257	397.208	34.6683	577.2	35.2531	0.00109908	0.539177
3599	xbz_27387	459.072	28.5882	638.784	35.926	0.000470679	0.476606
2379	xbz_27398	1540.59	43.8056	5239.22	111.558	0	1.76587
2369	xbz_27398	1438.46	31.7678	5942.7	152.238	0	2.0466
2359	xbz_27398	1668.01	43.2596	5315.21	183.023	0	1.672
3485	xbz_27400	618.171	27.2772	67.9663	12.2786	0	-3.18511
3495	xbz_27400	607.448	30.7293	71.5221	8.76528	0	-3.0863
3475	xbz_27400	639.058	65.3137	65.2394	9.34115	1.11022e-16	-3.29213
250	xbz_27642	1479.06	59.1979	1830.88	64.7392	0.00019102	0.307856
2772	xbz_28240	2466.34	94.442	3685.79	171.108	1.86908e-09	0.579601
2782	xbz_28240	2569.34	118.299	3337.97	168.815	0.000382939	0.377573
2762	xbz_28240	2728.87	117.966	3419.94	173.422	0.00176639	0.325666
3402	xbz_28242	840.472	49.4454	1156.41	62.6604	0.000247962	0.460378
3392	xbz_28242	843.766	31.4653	1053.22	56.0325	0.00304135	0.319897
3578	xbz_28291	417.415	21.3381	276.53	24.0871	6.17439e-05	-0.594045
3568	xbz_28291	450.434	30.436	305.093	29.5699	0.00119507	-0.562063
3588	xbz_28291	414.437	32.9875	304.304	23.0089	0.00931738	-0.445639
95	xbz_28632	7859.37	80.0622	20250.4	239.166	0	1.36546
105	xbz_28632	7081.54	120.078	17308.7	190.526	0	1.28936
115	xbz_28632	7193.83	91.464	19116.8	596.247	0	1.41001
1204	xbz_28951	4035	153.21	258.988	26.5334	0	-3.96161
1184	xbz_28951	3717.11	168.877	237.943	12.7625	0	-3.96549
1194	xbz_28951	3207.48	149.316	227.932	24.2214	0	-3.81476
942	xbz_29013	23517.5	403.48	28456.7	378.859	0	0.275033
932	xbz_29013	26226.5	349.12	32230.3	720.762	1.93956e-13	0.297394
952	xbz_29013	24387.2	379.932	27626.2	237.341	1.66456e-12	0.17991
1563	xbz_29172	3675.71	79.1709	6996.7	102.867	0	0.928653
1573	xbz_29172	3938.47	94.0414	6314.23	167.55	0	0.680972
1553	xbz_29172	4115.45	102.05	6184.04	173.86	0	0.5875
890	xbz_29174	1688.3	70.2693	3969.67	80.6088	0	1.23345
870	xbz_29174	1767.56	59.739	4200.9	110.046	0	1.24894
880	xbz_29174	1608.7	40.824	4236.74	139.005	0	1.39706
2307	xbz_29215	5778.24	102.031	19480.5	304.61	0	1.75333
2297	xbz_29215	6523.03	154.996	17682.3	225.196	0	1.43869
2317	xbz_29215	6212.38	136.297	17585.8	256.696	0	1.50119
1522	xbz_29532	317.071	23.1473	654.716	34.5285	2.67009e-13	1.04607
1532	xbz_29532	315.261	21.864	688.724	51.0261	6.69105e-10	1.12738
1542	xbz_29532	349.324	37.8769	682.765	38.8212	1.87554e-08	0.966825
2183	xbz_29533	8.17257	4.59228	43.5307	6.94118	0.00555069	2.41317
2141	xbz_3026	2581.33	83.2239	8504.22	140.673	0	1.72006
2151	xbz_3026	2231.9	95.9398	9394.72	336.779	0	2.07358
2161	xbz_3026	2402.4	112.634	8492.32	303.869	0	1.82168
1256	xbz_3182	27851.2	354.078	31550.1	414.136	3.29572e-11	0.179904
572	xbz_3731	652.671	28.5731	1908.74	49.7593	0	1.54819
582	xbz_3731	726.493	32.8501	1962.56	77.1398	0	1.43372
562	xbz_3731	778.016	28.1052	2061.68	92.5114	0	1.40595
1450	xbz_3733	23.7415	5.34464	67.2597	7.08362	0.00101748	1.50233
1430	xbz_3733	22.2741	4.53783	76.0395	11.3883	0.00133064	1.77138
1440	xbz_3733	14.7127	6.06465	72.7077	12.6132	0.00178335	2.30505
820	xbz_3737	631.434	38.4105	1858.52	35.9146	0	1.55745
810	xbz_3737	744.023	29.2738	1859.47	39.8925	0	1.32147
830	xbz_3737	711.449	31.3554	1780.73	69.3706	0	1.32364
500	xbz_3740	76.8524	8.62157	14.8686	7.57432	3.7217e-05	-2.36982
520	xbz_3740	70.5577	11.6683	11.4595	6.83219	0.000485133	-2.62226
510	xbz_3740	63.4888	10.2271	20.489	5.84567	0.00451182	-1.63165
882	xbz_3741	3701.61	67.2286	8667.4	124.517	0	1.22744
892	xbz_3741	4127.12	86.9841	8554.79	109.717	0	1.0516
872	xbz_3741	4399.82	66.517	8650.53	118.198	0	0.975345
1287	xbz_4623	23986.9	225.115	25655.9	158.641	4.42117e-09	0.0970439
1297	xbz_4623	28263.3	155.266	27087.5	295.77	0.000336268	-0.0613024
2370	xbz_4920	8142.31	125.915	11503.4	273.641	0	0.498553
2380	xbz_4920	9139.14	107.932	10891.1	203.248	1.61315e-13	0.253022
2360	xbz_4920	9465.56	145.178	10927.5	235.824	3.4365e-07	0.207202
1769	xbz_4929	773.692	47.1789	445.86	27.2275	1.0774e-08	-0.795169
1789	xbz_4929	658.876	33.0029	437.629	24.0911	4.55984e-07	-0.5903
1779	xbz_4929	667.651	37.7249	493.356	28.8664	0.000475389	-0.436466
35	xbz_4935	3667.79	83.7622	5752.1	137.013	0	0.649178
55	xbz_4935	3394.96	84.3016	5117.47	118.286	0	0.592038
45	xbz_4935	3118.86	77.0524	4488.87	89.6002	0	0.525331
1626	xbz_5186	5385.85	149.512	6742.46	130.989	4.55634e-11	0.324101
1328	xbz_5246	34959.1	315.294	29166.5	413.462	0	-0.261354
1308	xbz_5246	32749	486.248	28518.7	349.241	1.0274e-12	-0.199543
1862	xbz_5348	982.194	86.3775	581.777	43.945	4.56793e-05	-0.755541
1882	xbz_5348	853.982	50.8279	575.191	46.6022	8.47239e-05	-0.570165
1872	xbz_5348	864.013	68.0908	664.781	33.3239	0.00919272	-0.378173
2153	xbz_5579	9208.23	126.954	35010.4	309.597	0	1.92679
2163	xbz_5579	10197.8	171.818	32276.4	259.584	0	1.66222
2143	xbz_5579	10823	152.937	32746.8	273.203	0	1.59725
3929	xbz_5978	35.6196	4.08921	8.94722	5.10485	0.00808374	-1.99316
3919	xbz_5978	32.3118	3.01872	8.82882	4.44107	0.00864851	-1.87177
2070	xbz_6201	105.76	16.3415	342.024	36.564	1.42269e-07	1.69331
2060	xbz_6201	101.948	19.4859	332.336	38.0445	1.38877e-06	1.70481
2050	xbz_6201	124.448	19.273	309.903	35.9494	5.39335e-05	1.31627
334	xbz_6473	790.893	28.6144	558.03	31.6615	3.38145e-07	-0.503139
324	xbz_6473	757.608	30.8867	542.216	33.1339	7.45359e-06	-0.482583
314	xbz_6473	858.729	36.6985	593.673	44.0897	9.44059e-06	-0.532535
1915	xbz_6475	3956.73	157.447	9506.89	301.556	0	1.26467
1905	xbz_6475	3522.45	108.5	10314.3	412.505	0	1.55
1895	xbz_6475	3972.77	103.375	9354.25	364.772	0	1.23548
2277	xbz_701	112.504	19.025	234.285	35.206	0.00775433	1.05828
1192	xbz_702	2673.56	73.0054	6455.91	133.679	0	1.27186
1202	xbz_702	2924.52	115.435	6022.5	88.6804	0	1.04216
1182	xbz_702	3150.46	69.6672	6193.33	130.289	0	0.975154
1349	xbz_7200	17391	359.737	24249.7	278.14	0	0.479627
1359	xbz_7200	20588.1	179.496	24817.1	278.828	0	0.269529
1339	xbz_7200	19384.7	418.721	24160.1	192.175	0	0.317706
1864	xbz_7517	397.15	32.5288	1307.18	59.1651	0	1.7187
1874	xbz_7517	375.521	36.1187	1430.8	94.702	0	1.92986
1884	xbz_7517	425.53	29.8089	1293.63	101.1	4.88498e-15	1.60409
1562	xbz_7667	575.037	35.4334	891.924	26.8937	1.23265e-10	0.633267
1572	xbz_7667	577.619	45.6295	821.701	54.2537	0.00160923	0.508495
231	xbz_8049	2923.99	97.0124	2498.11	61.8098	0.00022759	-0.227099
221	xbz_8049	3394	92.6136	2972.55	102.617	0.00213244	-0.191289
1378	xbz_8050	5542.28	103.628	19878.7	257.352	0	1.84267
1388	xbz_8050	6237.95	128.957	18387.8	249.485	0	1.5596
1368	xbz_8050	6437.31	125.406	18223.6	315.991	0	1.50128
975	xbz_8207	85.7315	13.1355	195.073	19.1608	9.03183e-05	1.18612
965	xbz_8207	97.0552	10.6034	182.795	18.8041	0.0011543	0.913347
985	xbz_8207	97.1456	10.9116	186.778	24.1055	0.00450957	0.9431
3315	xbz_8328	592.036	35.7748	879.898	31.57	4.63951e-08	0.571651
3305	xbz_8328	469.18	16.9165	724.368	39.0282	7.36199e-08	0.626581
3295	xbz_8328	490.44	36.1868	749.944	42.2032	2.12793e-05	0.612706
1853	xbz_8337	7385.76	85.6796	21967.8	186.391	0	1.57257
1833	xbz_8337	7743.28	105.772	22076.9	247.092	0	1.51152
1843	xbz_8337	6669.43	141.06	24254.2	343.259	0	1.8626
1244	xbz_8338	5629.26	78.1498	14895.7	315.871	0	1.40388
1264	xbz_8338	5535.99	70.9575	15091.6	351.849	0	1.44683
1254	xbz_8338	4959.34	140.925	16134.7	496.576	0	1.70195
1810	xbz_8613	80.7806	8.30589	197.03	21.662	2.9899e-05	1.28633
1820	xbz_8613	85.4266	9.73886	185.716	17.7263	5.32595e-05	1.12035
2234	xbz_8644	4651.63	68.0353	1402.6	76.3059	0	-1.72963
2254	xbz_8644	4369.64	126.217	1412.23	56.2914	0	-1.62953
2244	xbz_8644	4020.23	177.829	1552.35	74.9479	0	-1.37283
1738	xbz_8656	284.954	29.5018	61.1534	10.795	1.23751e-10	-2.22022
1748	xbz_8656	256.804	17.963	87.9134	19.4893	1.58659e-08	-1.54651
1758	xbz_8656	274.384	32.5139	74.3198	15.9481	3.62588e-07	-1.88438
3346	xbz_8696	68.9314	6.59794	28.9669	6.85213	0.00210664	-1.25076
1417	xbz_8958	5079.85	182.103	699.741	53.0711	0	-2.85989
1397	xbz_8958	5609.64	234.494	633.484	51.261	0	-3.14653
1407	xbz_8958	4773.7	198.672	685.754	34.8098	0	-2.79935
2391	xbz_9235	163.264	16.2486	78.6392	12.1209	0.000317936	-1.05389
2411	xbz_9235	179.179	20.8403	87.5775	14.922	0.00135937	-1.03277
996	xbz_9265	2377.16	83.7185	1844.78	90.6338	1.80358e-05	-0.365795
1016	xbz_9265	2281.61	74.3444	1907.9	71.6695	0.000327538	-0.258068
272	xbz_9343	316.207	15.2572	583.63	33.7509	1.39282e-10	0.884185
252	xbz_9343	367.621	25.1052	615.479	32.0374	5.2255e-08	0.743492
262	xbz_9343	305.478	27.0668	535.821	33.7229	1.80899e-06	0.810684
841	xbz_9572	618.591	31.6503	429.95	31.4363	6.56761e-05	-0.524817
861	xbz_9572	572.347	29.7868	412.439	23.2006	8.12134e-05	-0.472709
1235	xbz_998	37066.6	342.527	26462.1	312.953	0	-0.486192
1215	xbz_998	35337.8	582.611	24639.9	364.381	0	-0.520217
1225	xbz_998	31822.4	273.076	25281.1	341.783	0	-0.331984
3245	chr10_C_2	2.37337	2.30927	5.22569	5.9107	0.865026
321	chr10_C_2	1	1.04697	1	13.4001	0.890963
362	chr10_C_2	1	1.06716	1	17.8181	0.90618
3689	chr10_D_4	26.0357	5.28379	2.62875	3.32881	0.0163023
3669	chr10_D_4	19.9427	3.13466	7.17431	5.07451	0.163221
3659	chr10_D_4	15.373	1.52873	1	7.85809	0.172823
3555	chr11_A_6	14.0377	4.19112	2.49153	7.46411	0.303184
2842	chr11_A_6	1	1.56837	1.49792	12.0208	0.971345
734	chr11_A_6	1	0.267779	1	42.8495	0.917877
280	chr11_A_7	4.82601	2.00454	1.39721	8.60553	0.70762
3028	chr11_A_7	3.03839	1.40465	2.14741	7.06868	0.851823
920	chr11_A_7	3.33062	2.28638	5.48757	5.00035	0.903498
3617	chr12_D_5	6.91155	1.462	1	10.981	0.573056
796	chr12_D_5	1.04334	1.76829	2.17877	7.55929	0.991978
2904	chr12_D_5	1.65761	1.18708	1	19.9344	0.87166
982	chr13_D_6	1.1287	2.29519	5.20554	7.62682	0.814127
3090	chr13_D_6	2.52583	1.58426	1	15.9477	0.817626
342	chr13_D_6	1.45916	1.28691	1	12.0212	0.846041
403	chr18_B_3	23.5246	4.77316	7.27391	4.91496	0.107187
3400	chr18_B_3	19.2827	5.20719	7.15709	7.37518	0.297875
300	chr18_B_3	2.76681	2.52634	5.81842	9.94905	0.914262
3214	chr2_B_2	3.02281	1.54422	1	10.4467	0.755421
290	chr2_B_2	1	1.49117	1	8.43017	0.884428
331	chr2_B_2	1	0.691977	1	19.9101	0.907341
279	chr2_D_1	11.3278	3.1181	2.63075	4.73657	0.312206
434	chr2_D_1	10.2697	1.7417	2.18829	5.89731	0.364468
3431	chr2_D_1	10.0613	4.42003	5.42282	6.43192	0.616049
3658	chr20_B_4	15.1132	2.29042	1	5.1825	0.0977118
3638	chr20_B_4	15.2276	1.97049	4.62401	3.75576	0.16125
3628	chr20_B_4	10.6859	1.73812	1	7.56433	0.309995
3627	chr6_A_4	24.7287	4.34818	3.22865	5.30994	0.0362047
3597	chr6_A_4	22.2674	4.18902	2.31324	4.83108	0.0418227
3607	chr6_A_4	16.2796	3.19654	6.66422	3.63562	0.230033
3586	chr8_B_5	14.9455	3.72856	1	8.30947	0.233307
2873	chr8_B_5	6.68608	2.28796	4.47902	5.86071	0.74716
765	chr8_B_5	3.67005	2.24504	3.26384	5.75582	0.88309
311	chr9_B_6	1.64571	0.839161	1	12.8462	0.840498
951	chr9_B_6	1	0.681732	22.2996	17.7807	0.358427
3059	chr9_B_6	1	0.406038	1	47.6411	0.917593
958	he_10021	31.663	3.49309	17.3062	5.01657	0.125238
948	he_10021	12.1529	4.69887	21.5783	6.40164	0.493065
938	he_10021	16.6308	4.21772	17.7006	7.06611	0.984727
989	he_10106	29.5529	3.50559	21.8736	4.96062	0.382798
979	he_10106	11.0184	5.27485	22.3879	8.2512	0.471461
969	he_10106	14.9153	4.79364	22.4329	6.28742	0.598265
677	he_10364	31.4762	7.97739	14.2252	5.98117	0.178343
657	he_10364	25.7395	7.10662	16.5423	8.27345	0.467916
667	he_10364	17.6608	7.67986	18.4188	6.02666	0.958774
1000	he_10527	22194	259.721	21377.4	231.438	0.0151734
1020	he_10527	25387.6	224.94	24843.9	436.978	0.228453
1755	he_10636	5.44093	5.42584	20.5722	8.16365	0.3207
1745	he_10636	14.6843	6.20835	26.6553	8.44754	0.47016
1765	he_10636	23.2025	5.49938	20.9674	5.96265	0.770123
450	he_11072	11.4799	3.85467	23.1029	4.04081	0.266302
460	he_11072	22.416	6.56257	12.9022	7.15741	0.42185
440	he_11072	18.0703	7.97884	13.9784	5.19205	0.68131
1134	he_11517	6.7028	4.27343	17.268	5.09567	0.373801
1124	he_11517	8.3401	3.64405	13.995	5.40871	0.665113
1144	he_11517	17.2421	4.53932	14.6069	4.44264	0.716847
1672	he_11662	9.02566	2.85932	5.35595	5.82792	0.646744
1652	he_11662	4.45203	2.88424	8.47675	7.03152	0.809253
1662	he_11662	1.91779	3.63474	6.29428	6.46992	0.781167
168	he_11733	1.40916	2.03348	9.61993	4.43679	0.410811
158	he_11733	5.59995	3.88841	5.92236	6.32969	0.937323
178	he_11733	1.9043	2.35996	4.2499	9.98942	0.953738
1175	he_11751	27.1506	5.04416	13.1418	5.88268	0.192232
1155	he_11751	15.0828	5.50316	11.9356	4.94187	0.700801
1165	he_11751	11.2816	5.22906	14.0644	4.69763	0.883597
220	he_12051	6.59095	2.45172	6.67368	6.91323	0.920637
230	he_12051	4.03014	3.20508	16.3922	8.21968	0.38944
240	he_12051	3.10669	3.20783	8.58768	7.52459	0.730271
688	he_12052	23.3205	5.76262	14.7984	4.75131	0.393634
698	he_12052	11.4084	3.78264	22.3052	6.47156	0.398248
708	he_12052	21.0152	5.90711	15.3922	4.83261	0.553649
3880	he_12203	51.0943	6.07859	19.8174	7.29992	0.0150217
3890	he_12203	34.4812	6.12449	19.4989	6.83435	0.212039
23	he_12335	1	1.70033	5.24566	4.61596	0.696524
13	he_12335	1	1.17872	11.0744	9.58215	0.481921
3	he_12335	1.39918	1.40199	1	12.3898	0.850496
1227	he_12443	1	0.908709	29.6054	14.7195	0.139934
1237	he_12443	10.5884	3.49153	6.29174	4.95349	0.591938
1217	he_12443	3.5842	2.1942	7.67958	6.09905	0.775267
47	he_12546	1.69108	1.76492	14.5557	3.35707	0.120238
37	he_12546	5.17253	2.59266	9.10858	4.54738	0.747891
57	he_12546	5.9181	3.12792	4.58005	8.16691	0.831852
1258	he_12588	1	1.2141	170.745	51.1631	0.00278911
2292	he_12763	3.76372	1.08584	1	10.7808	0.720415
2272	he_12763	1	0.642794	13.1672	18.0818	0.623978
2282	he_12763	1	0.686632	1.18267	50.3032	0.932119
2133	he_1289	12.177	5.08644	10.4584	6.37537	0.803452
2113	he_1289	8.45158	3.74891	11.2473	5.23975	0.871345
2123	he_1289	4.12438	2.45254	18.6736	12.4809	0.443884
3032	he_13009	7.16488	3.2611	4.45901	5.72515	0.716138
3022	he_13009	5.58889	2.88804	7.84469	5.28899	0.905214
3012	he_13009	6.44478	4.12475	3.12796	5.05094	0.671852
109	he_13117	5165.77	148.389	5417.69	150.531	0.287795
119	he_13117	5682.1	197.715	5948.71	188.62	0.392661
99	he_13117	5284.25	164.008	5310.91	243.427	0.986176
1279	he_13183	149.743	15.8332	210.187	16.8515	0.0335565
1299	he_13183	185.209	19.2458	207.637	25.1111	0.600836
3415	he_13388	349.127	27.4739	285.294	25.5576	0.0997728
3425	he_13388	308.592	21.5849	260.306	20.1865	0.121617
3435	he_13388	366.475	33.9819	315.23	37.1679	0.293514
922	he_138	13.245	4.39544	41.7384	10.8766	0.0873274
912	he_138	15.4493	6.86965	42.6845	11.2901	0.139062
902	he_138	19.8587	4.88072	31.3336	13.4174	0.601354
2230	he_13993	9.94077	3.55729	3.3661	6.14372	0.482806
2210	he_13993	2.18544	2.02389	3.97008	9.0329	0.977557
2220	he_13993	1	2.44446	10.4066	16.9499	0.702025
354	he_14144	2.19291	3.16923	10.4266	3.85052	0.415666
364	he_14144	1.00819	3.42339	9.79859	7.27018	0.531174
344	he_14144	4.20806	2.41317	1.20569	6.23179	0.697103
1475	he_14371	8.78819	4.67463	25.6664	5.41231	0.15769
1465	he_14371	15.5563	2.92277	29.3867	8.38946	0.331861
1485	he_14371	29.2452	5.18841	23.725	6.91402	0.585652
2582	he_14382	25.2696	7.01917	18.5499	5.96838	0.537038
2592	he_14382	24.4649	8.75907	17.2001	6.41946	0.55025
1578	he_14400	36.781	4.98957	14.1966	6.57456	0.0503408
1558	he_14400	21.1634	5.86221	11.3825	6.13445	0.371704
1568	he_14400	12.8929	4.14154	16.2275	4.78017	0.82784
726	he_14422	3.83941	3.7724	21.9388	7.4117	0.171277
736	he_14422	7.65656	3.72335	20.2784	11.4986	0.496543
716	he_14422	9.93528	4.01327	15.6978	6.60427	0.69925
2179	he_14700	1.90614	2.63193	8.49605	3.98477	0.517003
2199	he_14700	5.68085	2.98086	4.90825	6.6466	0.860523
2189	he_14700	1	0.735816	14.9659	21.8511	0.636443
3456	he_1492	275.863	17.8632	380.457	31.233	0.0119977
3466	he_1492	339.452	24.5566	424.345	47.1304	0.167636
3446	he_1492	328.543	26.8419	383.604	28.2525	0.239674
1301	he_15138	38.6814	8.41697	77.9246	15.8837	0.092462
2557	he_15140	2706.26	66.0752	2480.34	114.292	0.0769785
1332	he_15155	6.37471	2.93348	5.2582	5.96793	0.831908
1312	he_15155	1	1.70708	9.49593	7.97835	0.551337
1322	he_15155	1	1.61527	5.47418	7.65098	0.750805
1363	he_15187	7.45437	2.49131	1.52151	4.9297	0.46357
1343	he_15187	1	0.613762	15.645	23.1335	0.638071
1353	he_15187	1	0.478891	2.71975	14.7173	0.969212
1374	he_15199	1	0.774625	25.1863	11.7734	0.135746
1394	he_15199	10.6941	4.03173	3.98127	4.10047	0.424463
1384	he_15199	1	2.34381	5.32899	9.02617	0.810996
1425	he_15200	5.70593	2.11208	1	6.53145	0.57357
1405	he_15200	1	1.03798	1	16.356	0.897956
1415	he_15200	1	0.769923	4.424	15.3661	0.903099
1446	he_15201	13.2447	4.71142	27.8673	7.9695	0.317389
1456	he_15201	42.5165	7.29324	30.5382	8.46311	0.368719
1436	he_15201	18.9312	6.11772	30.8246	10.4332	0.525988
3508	he_15370	257.691	16.4783	199.876	20.4587	0.0433947
3518	he_15370	226.988	15.3889	182.496	18.1243	0.086998
3528	he_15370	276.64	26.2845	218.719	19.2573	0.0906052
2805	he_15397	62.2839	8.79903	80.781	11.3023	0.365428
2815	he_15397	91.2829	13.1654	87.4259	20.8955	0.809106
2795	he_15397	82.4471	18.3251	87.4419	10.5291	0.926595
822	he_15398	123.021	12.5687	185.99	17.7434	0.0191074
832	he_15398	159.464	22.1869	179.144	14.2353	0.587649
812	he_15398	168.904	17.1615	182.717	18.2757	0.712144
3043	he_15616	7.87088	1.77701	4.0317	4.96688	0.601003
3063	he_15616	3.74528	1.3185	1	15.7531	0.768894
3053	he_15616	3.13331	2.85227	9.06835	8.40243	0.722035
3222	he_15944	20.7029	4.25275	7.2895	3.96406	0.138808
3202	he_15944	11.3436	3.7964	8.71247	5.72847	0.726341
3212	he_15944	2.85892	2.88095	9.93339	7.19498	0.618843
2691	he_15980	10.2271	4.40377	7.367	6.19484	0.72297
2681	he_15980	3.80043	3.08199	11.3269	5.83811	0.544456
2671	he_15980	5.45202	3.05494	4.87229	5.35944	0.86955
898	he_16289	17.3109	3.16819	9.04081	4.22339	0.316031
888	he_16289	3.45397	3.8743	13.7702	6.62815	0.435393
878	he_16289	4.96961	3.53005	11.4087	6.39997	0.642103
1661	he_16347	3.71817	2.84046	53.3085	16.6966	0.0233959
1671	he_16347	20.4366	5.06689	43.9304	8.87407	0.12096
2106	he_1662	1.90871	1.35828	1	12.3206	0.825734
2086	he_1662	1	0.805824	12.4947	18.5947	0.655101
2096	he_1662	1	1.04204	8.0134	26.5805	0.87661
1733	he_16687	28.4698	5.98675	11.3214	4.19869	0.103291
1723	he_16687	9.37433	3.81496	11.8543	5.25023	0.896163
1713	he_16687	13.7234	4.46995	13.533	4.84752	0.900509
1764	he_16726	25885.2	154.107	26924	376.224	0.0153716
3249	he_16732	18.7277	3.38955	5.29643	4.96292	0.145671
3229	he_16732	15.4586	3.63048	6.26779	5.666	0.333401
3239	he_16732	6.99262	2.61057	6.01046	4.00527	0.826334
826	he_16903	1.21424	2.95684	10.7848	4.92449	0.378894
836	he_16903	8.41451	3.11276	2.5935	5.02028	0.485622
816	he_16903	5.06843	2.80426	6.97453	4.7625	0.925032
264	he_17154	6.02049	2.6934	19.1262	5.41003	0.22859
254	he_17154	8.92944	5.48686	13.2149	6.35777	0.810333
274	he_17154	11.7613	3.59736	15.1078	8.87739	0.88839
313	he_17193	3.67141	1.66091	1	6.81322	0.676836
323	he_17193	1	1.27663	5.78371	7.28971	0.729667
333	he_17193	1	1.10418	1	15.9675	0.902761
1703	he_17291	2453.48	75.077	2138.41	114.422	0.0190517
1683	he_17291	2018.51	77.7466	1917.77	70.6472	0.302456
1693	he_17291	1905.03	87.1628	1816.49	47.2949	0.334248
3667	he_17301	23.0923	2.82791	6.21975	3.38635	0.0336793
3677	he_17301	13.7548	3.81642	2.20425	4.14359	0.189595
1816	he_17423	2.46797	2.84531	15.1141	4.79317	0.222336
1826	he_17423	12.8169	4.20585	10.4704	5.32231	0.744798
1806	he_17423	5.79399	3.82254	12.5214	7.04421	0.649004
840	he_17443	4.09487	3.75224	5.37908	4.83646	0.983639
850	he_17443	1.55513	2.15566	11.4247	5.76712	0.38473
860	he_17443	1	0.614995	10.0829	19.0947	0.741197
3601	he_17477	468.288	41.8971	640.316	46.403	0.0131019
3621	he_17477	514.07	43.4958	667.646	36.317	0.0152433
3611	he_17477	457.27	32.2381	569.315	26.3686	0.018771
1906	he_17478	59.9734	12.4139	94.2745	15.8706	0.188119
1916	he_17478	87.5918	11.3598	78.6514	10.7681	0.573462
1896	he_17478	86.8301	10.5308	85.1665	17.8007	0.861482
171	he_17857	552.712	33.9738	428.5	32.7078	0.011177
1053	he_17916	10.8576	1.54442	3.58004	3.07156	0.275041
1033	he_17916	3.6626	2.97691	5.96246	5.01566	0.898109
1043	he_17916	1	0.538883	5.95722	13.6548	0.817244
2520	he_18076	15.1011	3.68482	39.5208	11.2462	0.149936
2530	he_18076	12.9952	4.74194	30.8755	9.61026	0.266194
2540	he_18076	32.6407	6.9649	45.5528	10.5151	0.501292
499	he_18321	2.10397	0.919154	1	9.99234	0.800038
509	he_18321	1	1.08938	15.7247	18.4045	0.551657
519	he_18321	1	0.826246	9.61609	22.5718	0.798482
3311	he_18422	22.1445	3.97379	5.64465	4.47629	0.0772242
3291	he_18422	14.3704	2.99723	6.22429	3.94555	0.307075
3301	he_18422	7.18909	2.85015	7.20303	4.71692	0.91599
2509	he_18466	5.40227	1.1295	1	11.1479	0.645481
2489	he_18466	1	0.795886	1	13.7582	0.897692
2499	he_18466	1	1.09682	1	13.7814	0.899494
2464	he_18518	20.2665	5.35669	49.9855	12.532	0.113352
2454	he_18518	27.6206	9.50813	41.4893	7.88808	0.457196
2474	he_18518	38.1514	6.69657	42.5812	8.86363	0.851554
388	he_18545	4.06857	2.91243	11.4943	3.99618	0.466899
378	he_18545	6.33132	2.68299	8.60376	4.36043	0.885902
398	he_18545	6.05718	3.31817	5.26708	5.2983	0.853715
34	he_18658	5.13357	2.46225	3.90864	5.61349	0.819304
44	he_18658	1	1.88059	11.7551	7.82353	0.399364
54	he_18658	1	0.717186	25.0998	20.13	0.349983
3749	he_18859	31.7322	6.56283	6.23979	3.86132	0.0208531
3729	he_18859	23.8196	4.23655	7.00971	2.94755	0.0510304
3739	he_18859	20.9532	5.15231	8.64197	5.66312	0.24306
1981	he_18955	57.1623	7.88292	103.856	22.2216	0.112058
2012	he_19075	69.0131	20.4223	20.8254	6.60309	0.0451929
1992	he_19075	42.3817	10.2863	21.5015	10.8755	0.226131
2002	he_19075	34.0428	13.2514	20.8474	7.97004	0.431558
1982	he_1916	6.81579	2.2554	2.49647	5.83451	0.596075
1972	he_1916	1	1.04197	1	16.6597	0.938809
1962	he_1916	1	0.18046	1	31.6175	0.918842
3598	he_19342	15.1078	2.4806	1	5.87195	0.121856
3608	he_19342	15.4714	3.31673	4.92531	2.28417	0.15318
3618	he_19342	4.41349	1.28496	1	7.45391	0.62718
199	he_19849	1.55509	2.3956	12.798	5.44127	0.303569
189	he_19849	7.25232	3.12683	4.99959	4.58556	0.730851
209	he_19849	1.63558	2.32745	5.59374	7.45798	0.818529
385	he_19909	1.59137	2.48022	9.49869	9.74563	0.647348
375	he_19909	1	1.347	1	12.342	0.879478
395	he_19909	1	0.783099	1	15.0673	0.912216
3660	he_19925	17.7748	2.77634	1.11086	6.41631	0.103208
3680	he_19925	18.2464	3.76555	3.78436	6.19073	0.162036
3670	he_19925	17.6353	2.99612	9.54434	4.76425	0.341414
3698	he_19980	22.0663	3.46243	7.93702	4.11111	0.104891
3708	he_19980	15.2149	4.68748	5.42044	6.79156	0.363137
2126	he_20127	3.94348	4.90562	16.3608	6.29116	0.35042
2136	he_20127	17.3832	6.07837	13.2776	5.18695	0.65221
2116	he_20127	7.62541	3.58362	10.1319	4.51884	0.880066
2147	he_20131	9.0744	5.50134	28.07	8.63099	0.218019
2157	he_20131	8.25539	6.22546	26.4406	12.8419	0.373005
2167	he_20131	25.9047	9.65797	26.038	6.64919	0.921568
2075	he_20265	10.0419	3.16424	13.3642	6.25514	0.844555
2055	he_20265	4.37468	2.35865	12.911	7.25937	0.528836
2065	he_20265	2.82589	4.83914	11.0005	7.10116	0.586052
581	he_20271	546.887	21.8753	638.242	39.9585	0.0821577
561	he_20271	572.261	37.627	653.294	46.2362	0.24287
3911	he_20337	26.4743	6.38094	2.88604	3.44711	0.026974
3921	he_20337	16.2931	3.31169	7.06501	5.9205	0.333845
2168	he_20375	4.55416	1.9709	1	7.32435	0.648418
2148	he_20375	1	2.1755	5.21605	8.65178	0.809952
2158	he_20375	1	0.632506	12.5933	20.3383	0.680931
2040	he_20416	126.016	14.5756	109.921	24.3384	0.545232
2020	he_20416	86.2205	9.12131	95.8662	11.7214	0.684779
2030	he_20416	86.8012	20.3322	95.4457	13.1759	0.841651
1036	he_20459	2.94524	2.63309	14.9872	5.25981	0.263845
1046	he_20459	5.54373	1.91679	13.3625	6.50789	0.534476
1026	he_20459	3.863	2.38215	9.49191	5.94212	0.662395
2302	he_20870	34.3152	4.98625	11.7696	4.7054	0.0283314
2312	he_20870	38.3852	7.08832	13.9621	5.13663	0.0424675
3567	he_20910	22.1934	2.77386	2.55139	7.4947	0.0798935
3587	he_20910	15.0676	4.95895	3.89482	3.09386	0.212321
3577	he_20910	12.8481	2.96677	7.71963	3.59901	0.482642
2446	he_20922	61.1283	6.90605	46.3497	4.69666	0.190892
2436	he_20922	30.2647	10.57	43.9432	11.2092	0.548803
2426	he_20922	40.0555	9.21034	41.854	10.3503	0.995235
2498	he_20942	50.1631	7.66415	26.5508	7.93565	0.0924572
2488	he_20942	45.3859	10.8393	28.9036	9.29817	0.312084
2354	he_21097	8.18929	3.48596	4.95846	7.26881	0.707024
2334	he_21097	2.10357	2.01546	4.37435	5.07094	0.89313
2344	he_21097	1	2.179	6.87578	8.53856	0.681763
1129	he_21132	5.6058	3.59467	18.417	4.98203	0.245303
1139	he_21132	7.87731	4.10905	19.7279	6.89358	0.377602
1119	he_21132	10.8208	4.94245	13.2873	4.64749	0.902315
419	he_21320	7.26473	3.7767	16.1923	6.4752	0.501103
429	he_21320	14.0571	3.90843	9.25635	7.80148	0.627263
409	he_21320	10.2992	3.01276	13.6591	6.50511	0.845301
2478	he_21337	7.02327	2.74075	2.06349	4.21921	0.509913
2458	he_21337	1	1.35496	4.9967	6.62625	0.757217
2468	he_21337	1	0.767549	12.5746	21.4768	0.698613
3725	he_21527	23.5868	2.70067	7.02588	4.1602	0.0494244
3745	he_21527	26.5883	4.37718	7.83746	5.05272	0.0615563
3735	he_21527	16.1486	3.57677	12.1216	5.22312	0.618108
674	he_21987	1.60707	2.25297	4.68325	6.75846	0.864435
664	he_21987	1	1.78757	10.4991	6.75168	0.41607
654	he_21987	3.05081	2.51918	1	7.12395	0.77242
2787	he_22155	18.1482	4.79276	55.4471	10.324	0.0200622
3187	he_22366	12.3985	2.88276	5.64361	4.82543	0.416529
3167	he_22366	11.941	2.11307	6.76638	4.48641	0.491738
3177	he_22366	6.44198	2.73218	11.8472	6.54897	0.702299
3807	he_22493	34.6837	3.49567	13.0195	4.32762	0.0171536
3787	he_22493	36.0327	6.24975	17.9184	8.24977	0.169631
3797	he_22493	19.0627	5.09269	11.3769	6.51584	0.461892
2829	he_22545	8.92892	4.1125	58.5526	15.2535	0.0161548
2839	he_22545	12.2031	4.541	63.2325	16.4914	0.0205457
2849	he_22545	31.466	6.34237	63.4459	8.74547	0.0393827
3129	he_22736	30.5865	6.29056	16.9372	5.72412	0.229164
3119	he_22736	13.3973	4.70897	18.8714	8.74458	0.773901
3109	he_22736	18.3914	2.36584	18.068	6.03018	0.890265
1937	he_22761	2.88459	2.91554	14.3859	6.23255	0.339785
1927	he_22761	12.7652	4.38365	8.82988	6.09269	0.652441
1947	he_22761	10.2913	3.76702	11.7298	7.78464	0.994262
2753	he_22762	4.30472	3.07553	4.90633	8.58006	0.95142
2733	he_22762	3.21969	1.75916	2.14396	7.99271	0.844933
2743	he_22762	1	1.67357	5.84477	7.17274	0.707662
1084	he_22798	13.4687	2.08561	5.92588	4.4245	0.337192
1064	he_22798	1.17672	1.56655	8.86542	7.69497	0.586256
1074	he_22798	1	1.45713	7.27962	6.93641	0.621756
1827	he_22897	15.3806	3.13679	8.23649	4.57831	0.390505
1807	he_22897	7.51496	3.7732	10.3614	5.13821	0.866082
1817	he_22897	1.31924	2.6609	9.26366	6.52563	0.538422
1869	he_23198	1.04942	2.84331	6.57419	6.53078	0.695189
1889	he_23198	2.46335	1.32856	1	13.951	0.809589
1879	he_23198	1	0.678692	11.7212	26.5241	0.781418
2960	he_23268	5.39564	2.56891	14.8125	6.282	0.441423
2970	he_23268	13.3098	3.39525	13.1217	5.66424	0.900703
2950	he_23268	9.32604	3.31707	10.8061	5.87423	0.974974
543	he_23269	6.9624	2.61834	15.0483	3.19014	0.371494
533	he_23269	15.738	5.72542	12.5328	3.54321	0.684092
553	he_23269	17.5724	3.77779	14.3728	5.84973	0.689131
326	he_23414	8.53118	3.69989	11.9061	3.93387	0.799619
316	he_23414	10.2983	5.86206	8.51933	5.9576	0.801464
336	he_23414	6.36432	3.6221	6.59995	7.12759	0.930481
2994	he_23428	25027.5	401.383	23857.9	362.128	0.0241373
3004	he_23428	28145	587.472	29223.7	333.775	0.138805
2984	he_23428	25045.4	457.478	24271.4	358.136	0.152659
2485	he_23458	324.08	46.3389	270.691	28.0484	0.305097
2495	he_23458	324.244	27.8378	304.723	16.9198	0.521296
1796	he_23832	7.50617	2.73123	3.09081	5.3535	0.582244
1776	he_23832	2.94658	2.63783	6.27234	6.59755	0.846356
1786	he_23832	1	0.709407	16.0903	12.0214	0.368729
1022	he_23994	19.2509	4.49622	7.59375	3.93538	0.200185
1002	he_23994	5.47623	3.02528	9.7949	4.79305	0.732432
1012	he_23994	2.48682	3.67454	9.43192	6.72846	0.623624
3887	he_24	35.048	4.86932	15.9253	6.2555	0.0860717
3897	he_24	29.5991	7.60324	15.9168	7.55749	0.298625
3118	he_24277	17.3488	5.579	27.1956	7.75584	0.533931
3128	he_24277	31.7993	4.82437	27.1589	10.3097	0.682147
3108	he_24277	17.4694	4.45646	20.114	3.89119	0.872107
3846	he_24664	19.2422	3.37779	1	6.23979	0.0737104
3866	he_24664	20.7162	4.13171	4.12544	4.58846	0.0809772
3856	he_24664	19.1323	2.76617	7.85738	4.22005	0.173893
202	he_24677	9.50734	4.72748	39.5089	8.3212	0.034735
192	he_24677	15.1518	4.71991	28.411	7.92617	0.368572
212	he_24677	15.8355	6.54426	27.7005	9.50387	0.509974
3190	he_24706	27.8139	5.06403	9.75534	3.66948	0.0606386
3170	he_24706	18.1398	5.05945	10.4667	3.30824	0.381914
3180	he_24706	13.8269	2.61911	13.1069	3.9809	0.849678
1858	he_24741	9.41525	2.78902	3.04375	6.66757	0.498527
1838	he_24741	1.39335	2.34476	11.769	6.05399	0.375446
1848	he_24741	1	1.52616	8.12312	11.8794	0.690069
3221	he_24757	41.3371	6.15082	16.9522	5.87354	0.0389923
3201	he_24757	23.5156	6.7655	15.0407	5.3677	0.435323
3211	he_24757	22.6204	7.56902	21.654	7.94821	0.863681
3253	he_24920	22.8778	4.57194	5.94048	3.7264	0.0678255
3233	he_24920	11.3977	2.99502	5.48543	5.06773	0.479078
3243	he_24920	3.06058	2.32876	4.27177	5.74455	0.990152
3594	he_2498	30.3689	3.65006	4.79508	5.41586	0.0108926
3574	he_2498	20.9174	3.25414	7.28027	4.94101	0.136581
3584	he_2498	11.83	3.96524	3.86426	4.33697	0.358981
3815	he_25	27.1256	3.68662	2.17055	7.08624	0.0280396
3825	he_25	22.7073	5.25339	8.98325	4.03462	0.16019
3835	he_25	24.0477	5.73051	8.98925	5.74864	0.175581
3344	he_2502	21.6575	4.7257	5.07044	4.16282	0.084529
3324	he_2502	20.0939	3.39872	7.81415	4.50571	0.165614
3334	he_2502	12.1977	2.83324	9.07055	4.7774	0.662942
3125	he_25082	24.0627	4.48234	7.52306	5.83111	0.116519
3105	he_25082	13.8447	4.55711	4.94483	5.26377	0.35639
3115	he_25082	7.98959	4.31177	7.69197	5.23663	0.892866
3691	he_25084	278.765	12.1389	211.913	19.7376	0.0101253
3701	he_25084	245.982	17.048	192.851	20.1997	0.063522
3711	he_25084	247.192	15.7551	221.809	18.3807	0.313332
2774	he_25327	3.68846	2.67558	14.4213	4.74056	0.300583
2764	he_25327	7.97227	3.38701	7.50787	6.81083	0.883028
2784	he_25327	6.12197	4.00117	5.58585	6.40342	0.877956
367	he_25328	86.458	13.7553	71.277	16.9043	0.486069
347	he_25328	82.3304	6.00159	74.7081	15.4447	0.632396
357	he_25328	73.0353	13.8671	80.2254	10.2515	0.81637
2137	he_25408	25.5775	8.28648	11.321	5.31989	0.254297
2117	he_25408	11.3302	4.80754	12.7842	6.89609	0.991483
2127	he_25408	14.0731	9.43919	7.02142	6.91263	0.577219
3314	he_25497	25.3727	4.49969	6.73731	5.66148	0.0762304
3304	he_25497	16.9305	6.2016	13.2603	4.40427	0.671235
3294	he_25497	14.3507	2.47858	11.4341	6.60627	0.709985
295	he_25626	4.71148	3.22263	15.7672	5.3851	0.330141
305	he_25626	6.42454	2.3636	4.24814	4.82247	0.733575
285	he_25626	8.90459	2.90399	7.62448	4.46105	0.806493
3593	he_25693	48.1241	8.15184	15.7444	5.96358	0.0159125
3583	he_25693	38.7201	6.15303	14.6804	5.45796	0.0374431
3831	he_25753	217.049	24.2263	144.492	16.6797	0.02252
3590	he_25788	19.593	3.83714	3.08181	2.95055	0.0471993
3570	he_25788	22.3414	4.73403	5.42772	4.58184	0.0870075
3580	he_25788	15.1578	2.76662	6.8967	4.99871	0.336283
1057	he_25933	3.57884	2.95616	5.55771	7.63232	0.95529
1077	he_25933	1	1.56017	9.37617	7.63563	0.510121
1067	he_25933	1	1.4708	11.1773	6.64381	0.359666
3914	he_26079	66.0216	8.31067	27.1695	12.8078	0.0333164
3924	he_26079	50.8358	7.45551	23.7494	8.50123	0.059857
3094	he_26080	10.8921	3.6377	3.7882	5.4057	0.432156
3074	he_26080	3.39722	1.65207	1	13.3127	0.764566
3084	he_26080	3.02508	1.87591	5.7447	7.31575	0.897038
646	he_26153	17.7194	3.48352	8.94686	3.08738	0.260152
636	he_26153	8.98399	3.66126	19.8073	8.44446	0.474223
626	he_26153	14.6273	4.14101	17.1118	6.74438	0.918455
50	he_26249	1	1.06982	36.2957	13.8443	0.0539105
60	he_26249	10.1097	4.53086	10.4206	7.10559	0.934768
40	he_26249	5.39803	2.8129	9.46508	7.06853	0.806594
233	he_26314	27.0498	4.54046	37.6221	8.81372	0.512219
243	he_26314	26.8072	6.83307	32.1752	9.07736	0.807588
223	he_26314	28.4251	7.54027	29.7434	7.95782	0.985175
2175	he_26344	1.45123	2.96187	4.50087	5.20413	0.84164
2195	he_26344	1.26632	2.09135	2.92568	5.58385	0.951855
2185	he_26344	1	0.79059	14.6598	13.9582	0.477463
2633	he_26418	2.4074	0.825095	1	16.7883	0.825701
2613	he_26418	1	0.349909	16.2635	19.0104	0.547774
2623	he_26418	1	0.364998	1	46.01	0.917683
153	he_26559	143.69	17.7004	105.71	14.8634	0.131007
133	he_26559	99.9069	11.7771	96.1551	12.3507	0.775297
143	he_26559	88.4189	9.46869	93.7078	17.2848	0.90721
3160	he_26584	20.8892	2.71606	7.17869	2.13979	0.0503589
3140	he_26584	11.4709	1.79337	4.9696	5.96123	0.455864
3150	he_26584	4.86979	4.52214	5.14554	6.50826	0.933259
463	he_26695	24.7459	5.87973	12.7641	7.74044	0.325507
453	he_26695	3.44954	4.22019	16.1227	7.92579	0.382688
443	he_26695	11.3781	3.16892	14.5267	3.05878	0.787349
935	he_26755	40.6218	7.96293	65.897	15.4135	0.280351
955	he_26755	50.3972	16.2593	66.1779	14.3754	0.611373
154	he_26836	12.3916	3.33896	6.79929	4.84871	0.499523
432	he_26836	16.3753	4.17528	11.6444	5.9983	0.598166
412	he_26836	5.3047	4.03263	15.7295	10.0091	0.548464
134	he_26836	3.29971	1.96124	7.76772	5.39364	0.723336
144	he_26836	1	2.00268	8.54319	6.18865	0.505636
422	he_26836	1	3.05194	19.0754	7.95212	0.172063
1576	he_27079	47.6366	11.9075	94.2102	18.6032	0.0926683
3884	he_27160	21.6967	2.75148	1.96854	4.10382	0.0200729
3894	he_27160	13.6061	2.98566	2.13363	5.79512	0.229196
3904	he_27160	10.8439	2.02667	1	9.23329	0.361548
2726	he_27208	3.36303	0.932774	1	9.57513	0.726499
[truncated: 1,949 more rows]

## Sheet: 差异数据
		Sample A			Sample B			log2(Sample B/Sample A)
No.	探针_ID	信号中值	重复探针点间标准偏差	重复探针点间变异系数	信号中值	重复探针点间标准偏差	重复探针点间变异系数	中值	重复探针点间标准偏差	重复探针点间变异系数
1	he_9720	4.93617	7.68389	1.55665	3353.33	25.3167	0.00754974	9.41037	1.35969	0.144488
2	he_28473	56.7666	10.7615	0.189575	16335.4	930.72	0.0569757	8.16874	0.184587	0.0225968
3	xbz_1041	6116.3	314.468	0.0514147	36.7702	5.31959	0.144671	-7.37798	0.277146	0.0375639
4	he_2066	6867.98	315.85	0.0459889	48.6902	6.23237	0.128	-7.1471	0.147844	0.0206858
5	he_31030	76.1128	12.7824	0.16794	10529.6	229.189	0.0217662	7.10099	0.185023	0.026056
6	he_28474	230.549	40.7858	0.176907	25167.5	389.623	0.0154812	6.79375	0.258692	0.0380779
7	he_9721	53.1387	16.0211	0.301495	5721.13	469.013	0.081979	6.74591	0.267286	0.039622
8	he_21871	4.14094	7.21277	1.74182	395.964	90.5886	0.22878	6.53515	2.18581	0.334469
9	he_31032	82.8307	15.5635	0.187895	6567.69	237.808	0.0362088	6.30908	0.202494	0.0320956
10	he_28482	172.805	17.4786	0.101146	12985.6	323.792	0.0249348	6.277	0.161287	0.025695
11	he_25728	15045.6	3838.45	0.255121	182.239	36.1637	0.198441	-6.2521	0.168576	0.0269631
12	he_16349	29.2672	13.537	0.462531	1797.78	14.3788	0.00799811	5.95938	0.581618	0.0975971
13	he_17441	34.0078	21.0545	0.619108	2058.9	52.4542	0.0254769	5.9574	0.689723	0.115776
14	he_31029	22.6504	6.19474	0.273494	1365.19	36.4027	0.0266648	5.91343	0.37759	0.0638531
15	he_14386	143.345	29.2012	0.203712	8166.5	232.174	0.0284301	5.83615	0.252591	0.0432804
16	he_28476	151.204	33.0015	0.218258	8351.69	298.466	0.0357372	5.83236	0.374544	0.0642182
17	he_42318	8.53621	10.6578	1.24854	214.129	66.9796	0.3128	5.7029	3.29189	0.577232
18	he_32353	13.9652	10.6465	0.762358	685.359	53.6428	0.0782696	5.61695	0.876411	0.15603
19	he_981	107.12	6.83609	0.0638174	4956.27	495.966	0.100068	5.54833	0.0564197	0.0101688
20	he_9463	154.303	21.2985	0.13803	6487.91	797.096	0.122859	5.40872	0.0456338	0.00843707
21	he_28480	247.011	42.927	0.173786	8506.56	250.688	0.02947	5.12906	0.266424	0.051944
22	he_25712	845.874	171.433	0.20267	26.6221	4.4757	0.168119	-5.01943	0.0523221	0.0104239
23	he_21873	49.4413	11.7161	0.23697	1721.77	98.6503	0.0572958	4.99024	0.363367	0.0728155
24	he_31031	49.1096	11.7446	0.23915	1495.75	44.4581	0.0297229	4.92872	0.327245	0.0663955
25	he_25733	8222.33	2169.76	0.263886	277.359	53.0018	0.191094	-4.88133	0.152927	0.0313291
26	he_10552	4.63907	9.70632	2.0923	131.621	7.94043	0.0603281	4.82641	1.50622	0.312079
27	he_37889	116.139	16.2917	0.140277	3036.06	136.684	0.04502	4.80054	0.195536	0.040732
28	he_21059	13.3136	9.37156	0.703906	370.552	17.4264	0.0470282	4.7987	0.951477	0.198278
29	he_14393	38.7026	16.0625	0.415024	1025.05	34.8586	0.0340068	4.79069	0.581472	0.121375
30	he_38881	1342.93	219.248	0.163261	48.8815	7.61427	0.15577	-4.70426	0.0705718	0.0150017
31	xbz_14113	5536.06	1056.08	0.190764	247.005	30.0488	0.121652	-4.56244	0.0869061	0.0190482
32	xbz_15823	10.7947	3.64676	0.337827	242.545	32.5705	0.134286	4.48985	0.705318	0.157092
33	he_41344	20.7506	9.42028	0.453977	394.067	50.3704	0.127822	4.24722	0.739649	0.174149
34	he_21872	19.8317	12.3617	0.623328	331.697	6.18438	0.0186447	4.04921	0.673233	0.166263
35	he_593	83.5462	14.056	0.168242	1354.98	64.5724	0.0476554	4.01956	0.150685	0.037488
36	he_52722	3388.3	448.147	0.132263	215.498	27.6223	0.128179	-3.97944	0.128896	0.0323906
37	he_31383	22.957	11.211	0.488348	359.825	1.6739	0.00465199	3.97925	0.599446	0.150643
38	xbz_28951	3717.11	417.447	0.112304	237.943	15.8512	0.0666173	-3.96161	0.0859257	0.0216896
39	he_22404	7.35325	9.16054	1.24578	101.525	4.68784	0.046174	3.78732	1.06279	0.280618
40	he_22155	4.49599	1.46725	0.326347	60.2006	1.91956	0.031886	3.78217	0.433445	0.114602
41	he_596	30.3597	7.34731	0.242008	419.949	21.9731	0.0523232	3.7553	0.280335	0.0746506
42	he_46744	58.5942	21.2464	0.362603	767.963	42.0647	0.0547743	3.73338	0.634925	0.170067
43	xbz_2724	504.079	51.2537	0.101678	38.7138	10.9643	0.283215	-3.7161	0.292942	0.0788305
44	he_11415	11.831	12.966	1.09593	156.122	23.8408	0.152707	3.66521	1.56953	0.428223
45	TU371	1117.7	156.489	0.14001	94.7545	12.2884	0.129687	-3.56019	0.0264388	0.00742623
46	he_33125	11031.2	977.838	0.0886429	885.6	96.9099	0.109429	-3.49453	0.0838282	0.0239884
47	he_28827	20.3349	6.91096	0.339858	224.175	11.8327	0.0527834	3.4626	0.742214	0.214352
48	rt_chr2_D_3	37.2706	2.06132	0.0553068	3.52606	0.455842	0.129278	-3.40686	0.266863	0.078331
49	he_28483	14.8169	5.16901	0.348859	136.955	9.00361	0.0657413	3.34215	0.546136	0.163408
50	he_25669	1541.96	137.725	0.0893185	157.992	12.3083	0.0779046	-3.29128	0.015929	0.00483976
51	he_37892	72.6638	9.99836	0.137598	630.952	45.0644	0.0714229	3.27779	0.207842	0.0634093
52	he_31033	25.8985	4.07285	0.157262	232.378	14.4224	0.0620643	3.27028	0.210365	0.0643263
53	xbz_18521	34.33	7.52533	0.219205	313.386	27.7131	0.088431	3.23655	0.370647	0.114519
54	he_25674	8210.13	514.311	0.0626435	901.997	56.1438	0.0622439	-3.18813	0.0417082	0.0130823
55	xbz_27400	618.171	16.0749	0.026004	67.9663	3.15046	0.0463532	-3.18511	0.102943	0.03232
56	he_11413	16.1596	13.7331	0.849843	142.843	2.11118	0.0147797	3.1715	1.2629	0.398203
57	he_5221	308.375	68.8475	0.223259	36.125	4.01696	0.111196	-3.11962	0.163292	0.0523436
58	he_6656	27.1786	3.49654	0.12865	3.38631	1.74839	0.516312	-3.10188	0.594787	0.19175
59	he_365	37.0315	9.17865	0.24786	319.487	13.4862	0.0422121	3.0697	0.425848	0.138727
60	xbz_15821	33.6453	6.36546	0.189193	279.543	19.3603	0.0692569	3.04899	0.398964	0.130851
61	he_17407	39.1619	18.0723	0.461476	321.944	21.9678	0.0682349	3.03929	1.04194	0.342825
62	he_25688	520.112	52.7271	0.101377	69.328	4.86805	0.0702177	-2.96472	0.0873812	0.0294736
63	he_46242	16810.8	1388.16	0.0825756	2208.19	79.0455	0.0357965	-2.92845	0.0683893	0.0233534
64	he_16755	5271.43	304.998	0.0578587	716.403	44.7836	0.0625118	-2.87935	0.172056	0.059755
65	xbz_8958	5079.85	422.927	0.0832557	685.754	34.9228	0.0509261	-2.85989	0.185454	0.0648466
66	he_598	34.2896	6.36349	0.185581	247.207	15.0158	0.0607416	2.85958	0.332242	0.116186
67	he_25676	477.433	44.1358	0.092444	65.426	2.80742	0.0429099	-2.85556	0.115186	0.0403375
68	he_49840	697.578	30.9885	0.0444229	91.8313	7.85848	0.0855752	-2.81986	0.131105	0.0464933
69	he_51788	17.9854	10.9425	0.608414	126.864	6.73808	0.0531126	2.81839	0.97335	0.345357
70	he_31018	31.634	12.3744	0.391174	223.091	26.5865	0.119173	2.81809	0.770112	0.273275
71	TU757	173.975	27.9742	0.160795	25.3407	2.53717	0.100122	-2.77935	0.103277	0.0371588
72	TU206	331.23	84.4042	0.254821	48.7822	9.9664	0.204304	-2.77264	0.0571295	0.0206047
73	he_23954	289.871	82.0231	0.282964	45.6176	5.49259	0.120405	-2.73756	0.20469	0.0747708
74	TU315	1953.06	254.096	0.130102	306.149	13.0859	0.0427435	-2.69297	0.16004	0.0594289
75	he_25586	36.0337	13.415	0.372291	248.767	12.3613	0.0496903	2.67458	0.426966	0.159639
76	he_36697	5868.49	330.536	0.0563238	979.574	77.5312	0.0791478	-2.60207	0.0476728	0.0183211
77	he_35693	895.432	43.4489	0.0485229	153.132	13.8332	0.0903351	-2.59351	0.104078	0.0401302
78	he_20181	1088.43	117.547	0.107997	195.977	10.4544	0.0533452	-2.5122	0.0817634	0.0325465
79	he_6841	69.3266	4.09016	0.0589984	13.4181	4.77231	0.355664	-2.48105	0.486774	0.196197
80	he_25588	35.8797	10.5527	0.294114	206.765	6.76181	0.0327029	2.45888	0.370656	0.150742
81	xbz_20219	5049.09	170.554	0.0337791	917.779	28.1131	0.0306317	-2.43554	0.0196606	0.0080724
82	he_12588	10.5467	4.60769	0.436887	54.332	4.62031	0.0850385	2.43475	0.774411	0.318065
83	he_18129	140.836	59.4219	0.421922	784.323	27.8999	0.035572	2.43363	0.453531	0.18636
84	he_33594	59.1157	8.07666	0.136625	319.212	13.3857	0.0419334	2.4329	0.270932	0.111361
85	xbz_14050	320.781	69.7563	0.217458	73.9132	11.3959	0.154179	-2.42058	0.186974	0.0772433
86	TU327	199.024	33.5819	0.168733	37.6209	5.79723	0.154096	-2.41607	0.077867	0.0322288
87	xbz_3740	70.5577	6.68553	0.0947526	14.8686	4.55967	0.306664	-2.36982	0.51477	0.217219
88	xbz_12548	35114	2263.46	0.0644602	6827.65	334.21	0.0489495	-2.36271	0.0306572	0.0129754
89	he_41264	35.9319	11.9036	0.331282	184.302	10.5652	0.0573252	2.35874	0.512775	0.217394
90	he_20697	2164.23	621.002	0.286939	426.236	67.7206	0.158881	-2.34413	0.158792	0.0677404
91	he_2174	592.348	41.674	0.0703539	113.023	5.26794	0.0466094	-2.33962	0.155179	0.0663265
92	he_28825	64.2266	7.324	0.114034	346.88	26.612	0.0767182	2.33553	0.242678	0.103907
93	he_50723	23103.3	969.314	0.0419557	4633.54	290.344	0.0626614	-2.31103	0.0611182	0.0264463
94	xbz_22825	431.701	5.41035	0.0125326	2180.53	84.883	0.0389276	2.30911	0.0555251	0.0240461
95	he_46408	4899.73	434.61	0.0887008	999.635	15.2983	0.0153039	-2.30497	0.104155	0.0451871
96	he_21594	172.972	22.461	0.129853	888.415	57.3255	0.0645255	2.28061	0.101185	0.0443676
97	TU79	1300.92	105.18	0.0808502	270.149	28.4446	0.105292	-2.2677	0.0379272	0.0167249
98	he_18955	25.3874	5.59443	0.220363	116.731	3.6436	0.0312138	2.21838	0.275488	0.124184
99	xbz_12775	11399.4	402.319	0.0352931	2513.11	193.87	0.0771435	-2.21359	0.0725644	0.0327813
100	he_2937	66.2989	11.0526	0.166709	304.219	16.9082	0.0555789	2.19914	0.256213	0.116506
101	he_25100	199.166	26.2852	0.131977	34.4713	5.60978	0.162738	-2.19337	0.230921	0.105281
102	TU126_1	140.82	31.9745	0.227059	31.2403	2.8833	0.0922943	-2.1789	0.153537	0.0704653
103	he_6808	41.031	0.96176	0.0234398	9.0789	0.63559	0.0700074	-2.1777	0.134902	0.0619469
104	xbz_19721	577.533	14.0058	0.0242511	126.052	11.1158	0.0881844	-2.17332	0.15153	0.0697228
105	he_52751	48.7494	3.65804	0.0750376	10.8407	1.35134	0.124654	-2.17252	0.288664	0.132871
106	xbz_11688	784.506	76.4702	0.0974756	172.388	11.7445	0.0681281	-2.15711	0.0773952	0.0358791
107	he_42311	38.9715	7.00519	0.179752	172.954	11.0326	0.0637893	2.1499	0.340373	0.15832
108	TU600	916.333	135.972	0.148387	223.099	24.1711	0.108343	-2.13502	0.209203	0.0979863
109	he_52701	1938.01	123.524	0.0637374	445.879	2.44101	0.00547459	-2.11985	0.0847922	0.0399992
110	he_38204	77.8464	10.7093	0.13757	338.055	5.75164	0.0170139	2.11856	0.244601	0.115456
111	he_38779	469.854	54.0445	0.115024	114.493	10.4358	0.0911483	-2.11104	0.054451	0.0257934
112	he_15138	16.1619	0.536219	0.0331779	69.8479	8.96727	0.128383	2.10604	0.233603	0.11092
113	he_4902	264.018	36.0193	0.136428	65.0554	3.16161	0.0485988	-2.09147	0.164845	0.078818
114	he_25673	1426.81	96.7696	0.0678225	336.721	39.1001	0.11612	-2.08253	0.0605339	0.0290674
115	he_9090	579.727	63.5106	0.109553	2303.22	282.625	0.122709	2.06408	0.0472753	0.0229038
116	he_41735	478.291	33.6234	0.0702991	2061.18	228.298	0.110761	2.05655	0.132991	0.0646669
117	he_35559	2089.84	240.83	0.115238	513.196	55.3285	0.107812	-2.02581	0.0101938	0.00503196
118	he_27079	25.4831	7.93076	0.311216	99.4537	0.349471	0.00351391	2.00029	0.461525	0.23073
119	xbz_14128	22008.4	1899.73	0.0863184	5439.28	186.267	0.0342448	-1.95909	0.1486	0.0758513
120	xbz_14070	470.692	97.2571	0.206626	147.548	17.8734	0.121136	-1.9496	0.233311	0.119671
121	xbz_5978	33.9657	2.33894	0.0688618	8.88802	0.0837196	0.00941938	-1.93247	0.0858357	0.0444177
122	xbz_14129	10948.1	1653.89	0.151065	3053.86	314.136	0.102865	-1.90026	0.0659978	0.034731
123	he_35269	47.1621	12.4015	0.262955	181.897	16.6214	0.091378	1.89779	0.336315	0.177214
124	xbz_23536	2072.8	113.998	0.0549969	7328.79	754.986	0.103016	1.89153	0.0765009	0.040444
125	he_42549	220.608	30.2062	0.136923	54.4319	3.86044	0.0709224	-1.88762	0.242676	0.128562
126	xbz_8656	274.384	14.2196	0.0518239	74.3198	13.3806	0.18004	-1.88438	0.336856	0.178762
127	he_4201	40.2683	7.34158	0.182316	157.173	13.8458	0.0880928	1.88063	0.123391	0.0656114
128	he_38410	103.205	3.92288	0.0380106	28.0722	0.441231	0.0157177	-1.87786	0.0775277	0.0412851
129	he_5002	39.3242	2.34057	0.0595198	10.7083	0.131756	0.0123041	-1.87546	0.103671	0.0552778
130	xbz_21088	66.4841	1.06323	0.0159922	18.1598	0.323168	0.0177958	-1.87228	0.00260238	0.00138995
131	he_23413	8867.13	685.735	0.0773345	2396.23	233.741	0.0975457	-1.87054	0.0391159	0.0209116
132	he_23031	103.462	3.71078	0.0358662	28.7007	1.09539	0.0381661	-1.84994	0.101209	0.0547093
133	he_25098	157.195	7.39855	0.0470661	43.4838	4.28388	0.0985167	-1.84618	0.203633	0.1103
134	he_36840	45.0406	2.09681	0.0465538	12.5952	0.836537	0.066417	-1.83916	0.163077	0.0886694
135	he_21878	855.377	45.2603	0.0529127	3034.32	211.469	0.0696925	1.82674	0.0251375	0.0137608
136	xbz_10910	115.125	24.0797	0.209162	32.1895	0.281722	0.00875197	-1.82261	0.291359	0.159858
137	xbz_3026	2402.4	174.733	0.0727325	8504.22	517.601	0.060864	1.82168	0.182003	0.0999095
138	he_5727	2612.1	106.893	0.0409221	9110.98	427.152	0.0468832	1.80842	0.00859236	0.0047513
139	he_9638	67.6045	25.2057	0.37284	19.5584	0.193791	0.00990831	-1.78933	0.42003	0.234742
140	he_43060	2543.79	125.074	0.0491681	8734.93	1005.69	0.115135	1.77982	0.10491	0.0589441
141	xbz_3733	22.2741	4.84507	0.217521	72.7077	4.4322	0.0609591	1.77138	0.408563	0.230646
142	xbz_27398	1540.59	115.01	0.0746534	5315.21	386.092	0.0726392	1.76587	0.194914	0.110378
143	he_37488	62.5944	8.73084	0.139483	18.3917	0.455438	0.0247632	-1.76015	0.166158	0.0944001
144	he_129	27.9913	8.59983	0.307232	100.546	5.80169	0.0577022	1.75924	0.45084	0.25627
145	he_40174	1502.03	107.363	0.071479	5078.98	526.269	0.103617	1.75763	0.0448025	0.0254903
146	xbz_2177	52.6889	10.3312	0.196079	166.677	17.2485	0.103485	1.75414	0.379732	0.216477
147	he_49836	1657.27	165.885	0.100095	5716.89	252.482	0.0441642	1.75406	0.208334	0.118772
148	he_38408	45.6324	6.3526	0.139213	13.5386	1.94716	0.143823	-1.75345	0.00671864	0.00383166
149	he_41210	21736.9	1339.53	0.0616244	6116.8	705.549	0.115346	-1.74125	0.0925487	0.0531508
150	he_10363	12435	629.342	0.0506107	39531.4	4319.32	0.109263	1.74057	0.111931	0.0643072
151	he_25101	1690.1	87.1481	0.0515639	5606.53	397.419	0.0708851	1.72797	0.0313605	0.0181488
152	xbz_7517	397.15	25.0803	0.0631506	1307.18	75.5886	0.0578256	1.7187	0.165251	0.0961488
153	he_11553	40.4493	9.36137	0.231435	126.433	4.58924	0.0362978	1.70867	0.357791	0.209398
154	he_40142	2029.82	163.174	0.0803884	6615.15	808.825	0.122269	1.70442	0.053843	0.0315901
155	he_24113	1070.5	240.016	0.224209	357.2	72.295	0.202393	-1.6959	0.0736179	0.0434095
156	xbz_6201	105.76	12.0418	0.11386	332.336	16.4768	0.0495787	1.69331	0.221077	0.130559
157	xbz_13763	1278.84	101.002	0.0789799	4191.94	182.338	0.0434972	1.6851	0.168828	0.100188
158	xbz_13762	118.994	1.31069	0.0110148	36.4529	5.34083	0.146513	-1.68431	0.206548	0.122631
159	he_25748	8666.4	1118.63	0.129077	2634.45	139.449	0.052933	-1.6645	0.185515	0.111453
160	xbz_14983	8427.89	383.814	0.045541	28025	2197.91	0.0784267	1.66429	0.080628	0.0484458
161	xbz_5579	10197.8	814.222	0.0798427	32746.8	1461.71	0.0446366	1.66222	0.174553	0.105012
162	he_44968	26.1209	6.53773	0.250287	81.1302	1.55947	0.0192218	1.65785	0.392663	0.23685
163	xbz_21085	1396.56	56.0862	0.0401602	4464.58	282.794	0.0633418	1.64954	0.141816	0.0859726
164	he_26104	1991.52	318.309	0.159832	642.374	75.6086	0.117702	-1.63239	0.0500814	0.0306798
165	xbz_8644	4369.64	316.3	0.072386	1412.23	83.8137	0.0593483	-1.62953	0.184042	0.112941
166	he_4723	3796.81	196.087	0.0516452	11657.2	361.912	0.0310463	1.61836	0.0298266	0.0184302
167	he_36543	11991.7	762.069	0.0635495	3766.49	517.418	0.137374	-1.61647	0.111592	0.0690346
168	xbz_13756	5877.06	417.56	0.0710491	18161	783.342	0.0431333	1.61354	0.154065	0.0954825
169	xbz_16233	8310.77	509.504	0.0613065	26597.3	1400.76	0.0526654	1.60978	0.075549	0.0469312
170	he_8209	937.493	130.741	0.139458	316.544	47.1032	0.148805	-1.60829	0.051938	0.0322938
171	he_25080	7273.26	470.634	0.0647074	20843.8	1995.5	0.0957359	1.60782	0.0764655	0.0475585
172	he_14115	459.286	36.8187	0.0801651	1374.91	12.3362	0.00897236	1.60401	0.116079	0.0723681
173	he_20180	1884.65	209.846	0.111345	629.665	21.6677	0.0344115	-1.60122	0.101959	0.0636758
174	he_50065	11425.1	825.077	0.0722162	3511.71	178.787	0.0509116	-1.59113	0.13104	0.0823568
175	he_15142	6252.61	429.941	0.0687619	18947.4	518.379	0.0273588	1.59112	0.136525	0.0858045
176	he_36542	111.675	6.54391	0.058598	36.1441	1.92154	0.0531634	-1.59024	0.100585	0.0632512
177	xbz_13753	7134.51	473.998	0.0664373	21418.3	530.025	0.0247464	1.58596	0.060887	0.0383914
178	he_31641	6754.4	457.167	0.0676843	20213.5	494.023	0.0244402	1.58142	0.134942	0.0853293
179	he_35178	23276.5	1656.55	0.0711685	7537.82	1025.71	0.136076	-1.581	0.0970668	0.0613958
180	he_44379	15722.3	1171.09	0.0744859	4981.88	948.789	0.190448	-1.5788	0.197873	0.125331
181	he_29521	9339.62	527.149	0.0564422	27836.8	3310.76	0.118935	1.57556	0.0988596	0.0627458
182	he_25083	6267.63	269.15	0.0429429	18672.5	1550.3	0.0830254	1.57493	0.0549188	0.0348707
183	xbz_8337	7385.76	546.824	0.0740376	22076.9	1289.72	0.0584194	1.57257	0.187572	0.119277
184	he_4967	27048.7	1719.73	0.0635792	9163.24	317.231	0.03462	-1.56163	0.0443987	0.028431
185	xbz_8050	6237.95	469.892	0.075328	18387.8	911.876	0.0495914	1.5596	0.182611	0.117088
186	he_20915	6761.18	535.626	0.0792208	2451.99	101.368	0.0413411	-1.55645	0.0846527	0.0543883
187	he_33649	17796	1279.97	0.0719246	5719.65	760.392	0.132944	-1.54951	0.109264	0.0705147
188	xbz_27253	70.5252	10.0755	0.142864	24.1383	0.598591	0.0247984	-1.53964	0.171034	0.111088
189	he_53133	6488.38	479.291	0.073869	18843	509.788	0.0270545	1.5381	0.14619	0.095046
190	he_38407	1728.22	88.7095	0.05133	4885.31	333.037	0.0681712	1.53808	0.0832463	0.0541235
191	xbz_17454	7603.59	298.943	0.039316	23495.3	2119.46	0.0902077	1.53749	0.118997	0.0773972
192	he_25081	5987.01	391.908	0.0654597	17372.4	327.098	0.0188286	1.53689	0.121316	0.0789358
193	he_35606	6926.89	417.139	0.0602203	2418.65	196.649	0.0813053	-1.518	0.0345683	0.0227722
194	he_51983	60.4062	4.94569	0.0818738	171.956	11.3351	0.0659187	1.50927	0.199582	0.132237
195	xbz_13760	124.047	4.58093	0.0369288	43.6577	1.1318	0.0259244	-1.50658	0.0171746	0.0113997
196	he_15653	5755.71	327.296	0.0568647	15297.2	669.54	0.0437688	1.50554	0.0858828	0.0570446
197	xbz_29215	6212.38	374.098	0.0602181	17682.3	1067.11	0.0603492	1.50119	0.166569	0.110958
198	he_37851	29920.2	1363.46	0.0455699	9913.68	585.213	0.0590309	-1.49505	0.0972458	0.0650451
199	xbz_13754	5926.24	411.672	0.0694661	17017.8	589.992	0.0346692	1.48646	0.147865	0.0994745
200	TU100,TU232	62.178	0.0992042	0.00159549	22.2652	2.41565	0.108495	-1.48587	0.154531	0.104
201	he_15651	8724.7	383.752	0.0439845	23849.3	2586.4	0.108448	1.4817	0.119433	0.0806056
202	he_47535	3596.17	337.684	0.0939011	1296.97	85.4813	0.0659083	-1.45697	0.114781	0.0787801
203	he_24979	1446.03	125.671	0.0869078	3946.92	421.741	0.106853	1.45399	0.0256346	0.0176305
204	xbz_11894	1710.91	106.723	0.0623775	4674.02	199.499	0.0426825	1.4499	0.153216	0.105674
205	xbz_8338	5535.99	362.863	0.0655461	15091.6	666.048	0.0441337	1.44683	0.16113	0.111367
206	he_28969	21750.9	1684.24	0.0774334	7825.2	205.907	0.0263133	-1.43633	0.131768	0.0917395
207	xbz_19	40625.6	2899.18	0.0713632	15194.1	562.053	0.0369916	-1.4352	0.155001	0.108
208	he_26137	28872.4	655.878	0.0227165	10755.7	200.852	0.0186741	-1.43415	0.00804066	0.00560655
209	xbz_3731	726.493	63.0024	0.0867212	1962.56	77.5775	0.0395287	1.43372	0.0753998	0.0525905
210	he_5403	123.665	37.1475	0.300389	46.9826	3.61059	0.0768496	-1.42701	0.305842	0.214323
211	xbz_250	156.761	7.71325	0.0492038	421.335	11.592	0.0275126	1.4264	0.111619	0.0782524
212	he_15588	20783.8	2584.19	0.124337	8046.24	757.883	0.094191	-1.41685	0.0450664	0.0318074
213	he_6836	694.556	52.6123	0.0757495	1840.6	65.4439	0.0355558	1.38779	0.148076	0.106699
214	he_31698	89.6777	5.11097	0.0569927	31.2864	4.1551	0.132809	-1.38615	0.166058	0.119798
215	he_9772	1478.85	126.379	0.085458	3831.07	284.814	0.074343	1.37219	0.0148302	0.0108077
216	xbz_28632	7193.83	420.431	0.0584432	19116.8	1483.66	0.0776104	1.36546	0.0610051	0.0446772
217	xbz_11034	7477.27	488.936	0.0653896	19445.5	1337.5	0.0687818	1.35419	0.0188956	0.0139534
218	he_16205	68.4356	8.22534	0.120191	174.351	15.0942	0.0865733	1.34918	0.0491448	0.0364257
219	he_52010	49.3855	10.5309	0.213238	124.265	4.09594	0.0329613	1.34746	0.262439	0.194766
220	he_37871	19773.3	1338.32	0.0676831	7773.57	926.988	0.119249	-1.34691	0.079851	0.0592848
221	he_32394	3642.07	231.445	0.0635477	9245.1	158.802	0.0171769	1.34393	0.11972	0.0890819
222	he_12204	4650.33	244.999	0.0526842	10842.6	957.396	0.0882992	1.33876	0.0938628	0.0701116
223	he_40976	40.4851	9.4269	0.232848	100.812	6.75606	0.0670164	1.33441	0.435772	0.326566
224	he_25777	3554.48	139.76	0.0393194	1385.19	20.3305	0.014677	-1.33013	0.0630716	0.0474178
225	he_4234	5703.6	449.333	0.0787806	2273.13	128.876	0.0566955	-1.32391	0.0459086	0.0346766
226	xbz_3737	711.449	57.9363	0.0814342	1858.52	45.1903	0.0243152	1.32364	0.135622	0.102462
227	he_31014	428.998	39.0701	0.091073	1029.07	30.6024	0.0297378	1.31087	0.15226	0.116152
228	xbz_13765	1542.97	102.421	0.0663794	3920.12	139.796	0.0356613	1.30498	0.123995	0.0950169
229	he_46034	21603.6	1648.85	0.0763231	8683.18	201.996	0.0232629	-1.2984	0.0876822	0.0675308
230	he_2031	22633.5	2881.9	0.127329	9312.55	1183.8	0.127119	-1.29029	0.00892846	0.00691972
231	he_25103	1585.68	67.2519	0.0424121	3853.13	275.439	0.0714845	1.28093	0.159556	0.124562
232	he_33647	26759.3	2102.29	0.0785632	10318.5	1136.92	0.110182	-1.27857	0.0718029	0.056159
233	he_38409	6245.7	375.54	0.0601278	15138.1	271.141	0.0179111	1.27725	0.112437	0.0880304
234	he_41259	21405.6	1572.03	0.0734401	8628.15	775.943	0.0899316	-1.2686	0.0314753	0.024811
235	xbz_14130	8580.01	1200.68	0.139939	3658.79	334.408	0.0913984	-1.26696	0.063288	0.0499527
236	xbz_6475	3956.73	255.487	0.0645703	9506.89	515.92	0.0542681	1.26467	0.173778	0.13741
237	xbz_29174	1688.3	79.4301	0.0470475	4200.9	144.956	0.0345058	1.24894	0.0903191	0.0723167
238	he_9882	23398.2	1949.03	0.0832984	9895.36	948.719	0.0958751	-1.24157	0.0166095	0.0133778
239	he_8774	1081.31	130.517	0.120703	449.913	63.0487	0.140135	-1.24078	0.0789208	0.0636055
240	he_20374	9652.73	406.613	0.0421241	21967.3	1540.16	0.0701115	1.23985	0.0706325	0.0569684
241	he_38577	1571.07	92.7973	0.0590661	3770.5	212.195	0.0562776	1.23747	0.0158455	0.0128048
242	xbz_21087	7675.34	266.604	0.0347352	18016.3	1931.19	0.107191	1.231	0.119263	0.0968828
243	he_7363	18253.1	1404.53	0.0769474	7603.88	680.972	0.0895559	-1.22804	0.0250459	0.020395
244	xbz_8613	83.1036	3.28515	0.0395308	191.373	7.99953	0.0418007	1.20334	0.117369	0.0975362
245	he_9307	213.184	27.7429	0.130136	92.984	2.96275	0.031863	-1.19705	0.240419	0.200844
246	he_16206	115.742	6.94053	0.0599656	50.7104	6.7624	0.133353	-1.19056	0.255459	0.214571
247	he_40953	4067.18	310.036	0.0762288	8739	963.559	0.11026	1.18642	0.0683197	0.0575849
248	he_25704	474.956	37.1347	0.0781856	219.879	16.5716	0.075367	-1.18245	0.109445	0.0925581
249	he_29964	24448.9	2099.56	0.0858755	10614.6	131.825	0.0124192	-1.18023	0.131385	0.111322
250	he_531	188.716	10.3263	0.0547189	389.129	50.9996	0.131061	1.17755	0.170274	0.1446
251	he_50521	23579.6	2041.71	0.0865881	10414.9	136.201	0.0130776	-1.16919	0.111933	0.0957357
252	he_52245	23755.4	1909.83	0.0803956	10577.8	490.509	0.0463715	-1.16721	0.0485215	0.0415703
253	he_21566	22228.1	1890.74	0.0850608	10096	958.39	0.0949279	-1.16517	0.0449979	0.0386193
254	he_9634	33659.9	2733.01	0.0811948	14858.4	2275.52	0.153147	-1.15962	0.0877902	0.0757061
255	he_13856	22863.7	2053.48	0.089814	10745.4	450.937	0.0419654	-1.15721	0.0827492	0.0715074
256	he_21880	389.087	47.1739	0.121242	937.998	59.1966	0.0631095	1.15664	0.138399	0.119656
257	he_38575	4076.44	253.919	0.0622893	9372.27	419.797	0.0447914	1.15276	0.0398852	0.0345997
258	he_51888	21068.1	1953.06	0.0927025	9546.89	588.237	0.0616156	-1.14196	0.045654	0.0399788
259	he_53034	1748.61	123.364	0.0705501	4155.44	212.259	0.0510798	1.13765	0.115349	0.101392
260	he_6831	944.269	49.7252	0.05266	2097.52	238.376	0.113647	1.12882	0.116064	0.102819
261	he_33220	2003.34	182.634	0.0911649	4441.45	122.03	0.0274753	1.12775	0.163346	0.144842
262	he_50815	23269.2	1928.76	0.0828892	10665.4	339.95	0.0318741	-1.12548	0.0818121	0.0726906
263	he_44807	2016.65	90.5091	0.044881	4287.11	263.816	0.061537	1.10858	0.0295366	0.0266436
264	he_33592	2620.61	141.506	0.0539975	5628.4	633.68	0.112586	1.10282	0.08886	0.0805749
265	xbz_13761	5605.93	377.95	0.0674196	12192.5	485.119	0.0397881	1.09947	0.151019	0.137356
266	he_8109	317.416	60.9691	0.192079	151.41	17.5328	0.115797	-1.09693	0.0904655	0.0824717
267	xbz_1241	282.326	27.4835	0.0973465	132.322	10.4458	0.0789427	-1.09331	0.243235	0.222475
268	he_20896	16631.8	1418.59	0.0852942	8066.4	434.871	0.0539114	-1.09129	0.0528738	0.0484506
269	xbz_11018	1001.1	50.4764	0.0504208	489.647	34.2528	0.069954	-1.08283	0.0919529	0.0849194
270	he_25099	7817.6	381.99	0.0488628	16552.9	1896.74	0.114587	1.08228	0.107789	0.0995941
271	he_25776	12929.6	411.807	0.0318499	6043.79	224.612	0.0371641	-1.07898	0.0302075	0.0279965
272	he_6842	4127.45	208.866	0.0506043	8712.73	137.564	0.0157888	1.06041	0.0939689	0.0886158
273	he_25690	38079.8	5446.1	0.143018	17199.4	1240.51	0.0721251	-1.05573	0.195567	0.185243
274	he_1493	1940.52	142.575	0.0734725	4168.71	243.156	0.0583289	1.05401	0.146275	0.13878
275	xbz_3741	4127.12	351.879	0.0852601	8650.53	60.7349	0.00702095	1.0516	0.129287	0.122944
276	xbz_29532	317.071	19.1649	0.0604437	682.765	18.1601	0.026598	1.04607	0.0802779	0.0767427
277	xbz_9235	171.222	11.2535	0.065725	83.1083	6.32032	0.0760491	-1.04333	0.0149322	0.0143121
278	xbz_702	2924.52	238.558	0.0815716	6193.33	218.313	0.0352497	1.04216	0.155607	0.149312
279	xbz_14076	30960.8	4426.63	0.142975	15844.4	1740.75	0.109866	-1.03899	0.0568357	0.0547029
280	he_26307	9046.08	929.007	0.102697	18494.8	285.882	0.0154574	1.02494	0.116332	0.113501
281	he_23346	2442.4	231.674	0.0948551	1207.85	131.307	0.108711	-1.01169	0.0398521	0.0393918
282	he_25747	14983.6	2178.25	0.145375	7257.01	564.857	0.0778361	-1.00473	0.133934	0.133303
283	xbz_1728	4207.58	271.575	0.0645443	8440.76	367.783	0.0435723	0.994893	0.143023	0.143757
284	he_24981	1776.97	117.8	0.0662926	3650.02	252.313	0.0691264	0.987709	0.030264	0.0306406
285	he_25668	19444.3	2950.71	0.151752	41211.5	5126.24	0.124389	0.983574	0.0610684	0.0620882
286	TU285	1950.93	359.304	0.184171	1002.02	132.603	0.132336	-0.974723	0.0592692	0.0608063
287	he_17153	2686.47	136.219	0.0507056	5323.58	310.507	0.0583267	0.969563	0.0343376	0.0354155
288	he_49594	221.614	23.4483	0.105807	403.784	25.4202	0.062955	0.969243	0.201041	0.207421
289	he_9058	792.884	75.8588	0.0956746	408.388	39.411	0.0965038	-0.962046	0.00643017	0.00668385
290	he_40162	8644.68	457.439	0.0529156	16229.9	2120.23	0.130637	0.961457	0.106457	0.110725
291	he_4491	284.718	67.1242	0.235757	167.607	13.7561	0.0820735	-0.955184	0.233273	0.244218
292	he_1011	650.893	46.6661	0.0716954	332.123	37.8193	0.113871	-0.95381	0.142429	0.149326
293	he_11555	210.174	17.956	0.0854339	381.064	30.7942	0.0808109	0.951874	0.117807	0.123764
294	he_36556	4361.24	238.96	0.0547917	2242.1	318.694	0.142141	-0.946232	0.122955	0.129941
295	xbz_8207	97.0552	6.564	0.0676316	186.778	6.26418	0.0335382	0.9431	0.149637	0.158665
296	he_34254	3703.88	204.85	0.055307	1871.65	83.3144	0.0445139	-0.939884	0.0470555	0.0500652
297	he_3332	5475.77	293.449	0.0535905	10722.7	857.841	0.0800024	0.939249	0.0549425	0.0584962
298	he_48081	13978.6	757.504	0.0541903	7513.45	754.098	0.100366	-0.93543	0.122776	0.131251
299	he_5069	341.854	2.66838	0.00780562	653.378	14.137	0.0216368	0.934538	0.0196807	0.0210593
300	he_2388	2255.1	98.0208	0.0434662	1167.8	90.2897	0.077316	-0.922778	0.132284	0.143355
301	he_36832	26651.5	1587.41	0.0595616	13803.8	622.634	0.045106	-0.911238	0.0563385	0.0618263
302	he_47213	13374.4	1035.59	0.0774308	25014.3	455.86	0.0182239	0.90328	0.0838622	0.0928419
303	TU56	20774.6	2130.27	0.102542	10725	810.995	0.0756175	-0.897739	0.11661	0.129893
304	xbz_20511	5919.42	300.157	0.0507071	11022.8	1593.07	0.144525	0.896959	0.121258	0.135188
305	he_53032	3834.7	186.119	0.0485354	7349.13	655.029	0.0891301	0.896875	0.0826893	0.0921971
306	he_2914	7244.73	469.713	0.0648351	3750.9	358.863	0.0956738	-0.892411	0.0549081	0.0615278
307	he_15624	322.93	50.9727	0.157845	573.082	28.2993	0.049381	0.892113	0.199612	0.223752
308	he_21018	555.46	54.7654	0.0985947	302.193	8.17298	0.0270456	-0.858608	0.17168	0.199951
309	xbz_27255	225.271	13.0825	0.0580747	374.85	27.2444	0.0726809	0.855855	0.124551	0.145528
310	TU452	236.051	49.5808	0.210043	122.669	29.1208	0.237394	-0.8514	0.0751404	0.0882552
311	xbz_15227	5052.21	246.946	0.0488789	2719.74	95.8826	0.0352543	-0.849427	0.072257	0.0850656
312	he_52022	453.503	93.0321	0.205141	854.338	70.3632	0.08236	0.84827	0.149903	0.176716
313	he_24403	6583.17	468.343	0.0711424	3660.79	341.801	0.0933682	-0.84663	0.031735	0.0374839
314	he_7253	2816.85	162.4	0.057653	1571.25	114.191	0.0726754	-0.842165	0.0211696	0.0251372
315	he_22725	7567.77	594.588	0.0785684	13561.5	1488.5	0.109759	0.841573	0.0411608	0.0489094
316	he_19454	2544.04	176.69	0.0694523	1441.6	59.5687	0.0413212	-0.832443	0.145206	0.174433
317	he_52854	13028.9	905.983	0.0695365	22352.9	1665.78	0.0745217	0.82724	0.0289535	0.0350001
318	he_38587	7174.94	748.92	0.10438	12636.4	1485.3	0.117542	0.818772	0.0161888	0.019772
319	he_51961	20012.7	1583.09	0.079104	33672.3	2793.53	0.0829623	0.816057	0.0448396	0.0549467
320	he_9059	853.633	39.1819	0.0459002	486.019	23.4744	0.0482992	-0.812602	0.133483	0.164266
321	xbz_9343	316.207	33.2172	0.105049	583.63	40.0949	0.0686992	0.810684	0.0703701	0.0868034
322	xbz_14049	15005.8	2309.13	0.153882	28234.8	2868.35	0.101589	0.805073	0.0854044	0.106083
323	he_1586	17654.4	2080.94	0.117871	10142.2	1288.14	0.127007	-0.799657	0.0202677	0.0253455
324	xbz_25897	13724.7	998.459	0.072749	23795.5	968.802	0.0407138	0.799169	0.0883759	0.110585
325	xbz_13680	1423.75	102.704	0.0721365	2506.08	84.9305	0.0338898	0.793898	0.155574	0.195962
326	he_20919	11422.5	931.655	0.0815632	20738.5	1318.07	0.0635569	0.792008	0.0440743	0.0556488
327	xbz_11316	11827.1	1057.07	0.089377	20321.6	94.8092	0.00466544	0.791522	0.130292	0.164609
328	he_15724	25597.9	2102.95	0.0821532	44573.4	2862.96	0.0642303	0.773842	0.0270997	0.0350196
329	he_48076	754.679	71.2017	0.0943471	1268.84	19.3325	0.0152364	0.757499	0.146208	0.193014
330	he_30889	11451.5	834.112	0.0728386	19306.3	435.478	0.0225563	0.75353	0.0778991	0.103379
331	he_47515	4401.71	463.454	0.10529	2870.87	205.346	0.0715275	-0.753452	0.0950715	0.126181
332	he_25753	209.657	13.7048	0.0653676	125.319	12.276	0.0979579	-0.744354	0.0471773	0.0633802
333	he_27875	521.886	53.9097	0.103298	870.802	29.1153	0.0334351	0.738609	0.209448	0.283571
334	he_41333	2317.52	174.967	0.0754978	1357.6	107.221	0.078978	-0.729895	0.0392146	0.0537263
335	xbz_26373	683.799	36.0061	0.0526559	1127.95	124.34	0.110236	0.722052	0.227468	0.31503
336	he_36597	323.349	62.6046	0.193613	538.989	38.1801	0.0708364	0.720502	0.146991	0.204012
337	he_197	16277	1187.17	0.0729357	9284.28	1121.35	0.12078	-0.713786	0.0924672	0.129545
338	he_36910	47447.4	2642.7	0.0556974	26949.4	1642.38	0.0609433	-0.706414	0.122125	0.17288
339	he_50707	7942.81	414.635	0.0522026	12928.3	1433.48	0.110879	0.702816	0.0921374	0.131098
340	xbz_29172	3938.47	221.262	0.0561797	6314.23	436.485	0.0691272	0.680972	0.176289	0.258879
341	he_47505	14660.4	1311.94	0.0894882	23424.3	577.683	0.0246617	0.676081	0.0926699	0.137069
342	he_28713	377.281	33.0967	0.0877244	599.869	22.7263	0.0378854	0.671272	0.0720521	0.107337
343	he_47551	9959.09	905.595	0.0909315	15765.5	321.552	0.0203959	0.662686	0.10496	0.158386
344	xbz_27054	11748.7	606.563	0.0516282	7441.43	1261.51	0.169525	-0.658849	0.150828	0.228927
345	he_19455	1866.67	225.244	0.120666	3011.04	93.8728	0.0311762	0.654738	0.133838	0.204414
346	he_24730	488.087	95.5057	0.195674	310.12	27.5185	0.088735	-0.654309	0.12806	0.195719
347	xbz_13911	1035.44	22.0446	0.0212901	1653.1	49.9562	0.0302198	0.651739	0.0564136	0.0865586
348	he_53589	360.939	45.7662	0.126798	570.665	15.6889	0.0274923	0.647601	0.170462	0.263221
349	he_7041	26986.2	2371.74	0.0878873	41225.9	1351.89	0.0327922	0.642385	0.158299	0.246424
350	he_23347	3015.86	252.735	0.0838019	1989.35	162.605	0.0817379	-0.641994	0.0332733	0.051828
351	he_8778	25324.2	1812.18	0.0715594	39466.6	5901.72	0.149537	0.641883	0.0957584	0.149184
352	he_1991	40167.7	3033.15	0.0755122	24542.8	3341.49	0.136149	-0.640205	0.0907286	0.141718
353	he_21561	22664.7	2277.54	0.100488	36281.9	2591.83	0.0714359	0.62969	0.0564661	0.0896728
354	he_47514	5953.44	571.272	0.0959567	3689.53	113.263	0.0306984	-0.623621	0.140357	0.225068
355	he_39736	5099.94	282.876	0.0554666	3332.65	343.091	0.102948	-0.613811	0.0671117	0.109336
356	xbz_8328	490.44	65.66	0.13388	749.944	83.3983	0.111206	0.612706	0.028564	0.0466195
357	he_21967	6666.98	520.211	0.078028	4371.28	417.855	0.095591	-0.608977	0.0285747	0.0469225
358	he_28711	933.091	62.0102	0.0664568	1317.04	63.6046	0.0482937	0.607166	0.109998	0.181166
359	xbz_14675	37151.4	3049.61	0.0820859	24397.3	627.586	0.0257236	-0.606696	0.0981499	0.161778
360	he_5651	8627.39	313.939	0.0363886	5522.84	129.767	0.0234964	-0.606132	0.0749387	0.123634
361	he_4064	9473.14	528.431	0.0557821	6405.42	450.367	0.0703102	-0.605631	0.0777265	0.12834
362	he_5138	16096.1	947.329	0.0588546	10220.5	271.459	0.0265601	-0.602217	0.0758897	0.126017
363	he_9859	1008.24	68.0871	0.0675306	674.772	26.5667	0.0393714	-0.601451	0.128196	0.213144
364	he_47496	11248.2	1014.58	0.0901989	17063.1	238.098	0.013954	0.601179	0.109228	0.181689
365	xbz_4935	3394.96	274.465	0.080845	5117.47	631.621	0.123424	0.592038	0.0619851	0.104698
366	xbz_4929	667.651	63.9065	0.0957184	445.86	30.0808	0.067467	-0.5903	0.179956	0.304855
367	he_2348	7343.48	491.477	0.066927	4645.58	536.349	0.115454	-0.580405	0.0900051	0.155073
368	xbz_24446	6474.99	391.748	0.0605017	9644.79	522.32	0.0541557	0.574872	0.15426	0.268337
369	xbz_27257	389.98	10.2216	0.0262106	580.174	4.20523	0.00724822	0.573313	0.0482753	0.0842041
370	xbz_16514	751.033	15.2879	0.0203558	1116.39	69.3865	0.0621526	0.571892	0.117499	0.205457
371	xbz_7667	576.328	1.82612	0.00316854	856.813	49.6552	0.0579534	0.570881	0.0882272	0.154546
372	xbz_5348	864.013	71.304	0.0825265	581.777	49.9326	0.0858277	-0.570165	0.188694	0.330946
373	he_9776	2438.32	190.684	0.0782027	1605.23	135.899	0.0846603	-0.567727	0.0290915	0.0512421
374	he_26540	34587.3	3773.29	0.109095	23698	193.032	0.0081455	-0.562769	0.146273	0.259917
375	xbz_28291	417.415	19.9784	0.0478621	304.304	16.2679	0.0534592	-0.562063	0.0781046	0.138961
376	he_29970	766.73	38.161	0.049771	1108.9	37.2954	0.0336329	0.561447	0.0368037	0.0655515
377	he_35750	9997.27	627.404	0.0627575	6688.21	846.27	0.126532	-0.559611	0.0932177	0.166576
378	he_13939	2688.53	315.868	0.117487	1933.5	82.572	0.0427059	-0.555747	0.116875	0.210302
379	xbz_25639	5001.65	282.067	0.0563948	3539.41	79.328	0.0224128	-0.551264	0.085826	0.15569
380	he_25409	1165.53	68.3028	0.0586025	1664.16	130.973	0.0787025	0.549054	0.0603244	0.10987
381	he_30884	15491.7	1243.67	0.0802798	22557.7	679.014	0.0301011	0.547176	0.0900787	0.164625
382	xbz_10964	450.401	11.2143	0.0248985	653.529	52.7933	0.0807818	0.534907	0.152595	0.285274
383	he_31035	37823.6	2852.07	0.0754046	24011	2339.2	0.0974221	-0.534553	0.0760822	0.142329
384	he_49596	381.118	5.2518	0.01378	552.369	63.9496	0.115773	0.530615	0.147519	0.278015
385	xbz_15625	32940.2	2402.91	0.0729476	21487.2	1532.43	0.071318	-0.53044	0.0634178	0.119557
386	he_20939	9870.71	1147.99	0.116303	14249.9	1627.11	0.114183	0.517472	0.00864544	0.0167071
387	he_32	1820.67	170.809	0.0938164	1294.18	83.9366	0.064857	-0.515706	0.0557715	0.108146
388	he_30695	26269.4	2098.52	0.0798845	35344	1995.42	0.0564572	0.514243	0.0907206	0.176416
389	he_26246	33793.6	3801.49	0.112492	23561.4	211.482	0.00897577	-0.505316	0.159592	0.315826
390	he_52927	35604.5	2688.42	0.0755079	23519.7	3303.94	0.140475	-0.504031	0.0984083	0.195243
391	xbz_6473	790.893	51.535	0.0651605	558.03	26.3571	0.0472325	-0.503139	0.0251065	0.0498997
392	he_43853	20804.9	1628.78	0.0782884	28913.9	1939.76	0.0670874	0.503011	0.0489499	0.0973137
393	xbz_20069	364.268	21.1907	0.0581735	248.675	5.85612	0.0235493	-0.499199	0.0871405	0.174561
394	xbz_9572	595.469	32.6996	0.054914	421.195	12.3822	0.0293978	-0.498763	0.0368459	0.0738746
395	he_38247	15272.8	528.831	0.0346258	20270	1259.81	0.0621515	0.492557	0.100504	0.204046
396	he_36788	1366.93	68.07	0.0497977	1920.18	116.749	0.0608009	0.491222	0.0296504	0.0603604
397	xbz_998	35337.8	2672.36	0.0756233	25281.1	924.347	0.0365628	-0.486192	0.100308	0.206313
398	he_53189	30033.1	2375.18	0.0790856	39847.8	6015.32	0.150957	0.484244	0.102716	0.212115
399	he_45012	23856.9	3207.52	0.134448	34875	1135.33	0.0325544	0.481921	0.151567	0.314506
400	he_9068	3732.98	233.781	0.0626258	5213.75	122.731	0.0235398	0.469411	0.116209	0.247564
401	xbz_22723	4369.09	219.533	0.0502468	6030.12	368.157	0.061053	0.464854	0.160508	0.345287
402	he_47519	20291.8	1704.09	0.0839792	27942	880.591	0.031515	0.461537	0.0781659	0.16936
403	he_44575	7606.38	327.044	0.042996	10976.8	1129.49	0.102898	0.460641	0.125676	0.272828
404	he_37317	42773.6	2467.38	0.0576845	28859.2	1695.04	0.0587349	-0.46054	0.128387	0.278774
405	he_14423	619.969	46.27	0.0746328	860.549	26.1243	0.0303577	0.460293	0.0745596	0.161983
406	he_5126	16315.7	759.906	0.0465751	22157.1	637.101	0.0287538	0.458037	0.102942	0.224747
407	he_29304	12152.4	1460.09	0.120148	17561.7	786.395	0.044779	0.456681	0.118148	0.258711
408	he_11181	6144.54	697.384	0.113497	8728.05	595.457	0.0682233	0.45167	0.0695884	0.154069
409	he_51342	2831	213.759	0.0755064	3868.77	131.029	0.0338683	0.451397	0.149921	0.332126
410	he_28451	32400.3	2787.37	0.086029	23755.1	282.24	0.0118813	-0.447773	0.110623	0.247052
411	he_12202	746.455	44.7555	0.0599574	548.291	52.5938	0.0959233	-0.445115	0.0490548	0.110207
412	he_8776	28476.2	2388.58	0.0838799	38758.6	4555.85	0.117544	0.44476	0.0440346	0.0990077
413	xbz_26076	11704.2	903.478	0.0771929	16452	485.187	0.029491	0.44144	0.106316	0.24084
414	he_51344	852.756	66.7761	0.0783061	1119.79	39.121	0.034936	0.43347	0.0883158	0.203742
415	he_17857	632.198	0.904169	0.0014302	468.886	26.6126	0.0567572	-0.432302	0.0798639	0.184741
416	he_40343	26413.2	1654.99	0.0626577	34615.8	4949.2	0.142975	0.428412	0.110046	0.25687
417	he_19742	33911.8	2854.65	0.0841786	26036.3	1831.62	0.0703487	-0.420291	0.0268713	0.0639349
418	he_18278	34191.5	3091.97	0.0904309	27091.9	1854.57	0.0684547	-0.412433	0.0511744	0.124079
419	xbz_14154	1841.24	327.165	0.177688	1512.09	165.907	0.10972	-0.403559	0.109328	0.27091
420	he_13555	18223.9	1643.12	0.0901628	24565.3	1712.12	0.0696967	0.394452	0.0325457	0.0825087
421	xbz_28242	842.119	2.3296	0.00276635	1104.82	72.9617	0.0660397	0.390138	0.0993355	0.254617
422	he_39302	34561.3	2468	0.0714093	26435.6	2822.17	0.106757	-0.386677	0.0479076	0.123896
423	he_40719	26157.6	1764.36	0.067451	33652.8	4992.44	0.148351	0.386149	0.10526	0.27259
424	he_14017	34087.1	2813.15	0.0825282	26383	1844.19	0.0699007	-0.385691	0.0185477	0.0480896
425	he_48015	20244.2	403.19	0.0199163	15570.7	373.919	0.0240143	-0.378675	0.00576784	0.0152316
426	xbz_28240	2569.34	132.274	0.051482	3419.94	181.833	0.0531686	0.377573	0.13416	0.355321
427	he_51418	1714.49	117.825	0.0687231	2220.24	68.1367	0.0306888	0.372939	0.144436	0.387291
428	he_40138	10490.8	722.603	0.0688794	13248.4	1740.54	0.131378	0.365877	0.0818147	0.223613
429	he_18225	33538.4	2808.92	0.0837524	26753.3	1669.93	0.0624196	-0.364718	0.0350883	0.0962068
430	he_23737	16506.4	1319.4	0.0799329	12781.9	1977.77	0.154732	-0.361989	0.0935493	0.258431
431	he_9775	5432.72	430.581	0.079257	4231.47	350.247	0.082772	-0.35625	0.00482288	0.0135379
432	he_20151	32428.9	2773.75	0.0855334	25637.6	2250.44	0.087779	-0.352272	0.0168228	0.0477552
433	he_27218	6219.07	549.347	0.0883327	4574.13	210.279	0.0459714	-0.349358	0.144798	0.414467
434	he_10229	13332.4	1734.1	0.130066	10466.9	1349.46	0.128926	-0.349104	0.00140376	0.00402104
435	he_39883	33662.7	2109.42	0.0626633	26464.6	3676.43	0.138918	-0.347086	0.0999116	0.287858
436	he_28961	19505.6	1945.67	0.0997491	24155.5	3815.37	0.15795	0.346351	0.074538	0.215209
437	xbz_7200	19384.7	1614.73	0.0832991	24249.7	356.292	0.0146926	0.317706	0.110061	0.346424
438	he_15140	3066.9	36.9615	0.0120518	2464.06	33.7996	0.013717	-0.315756	0.0371775	0.117741
439	xbz_9265	2329.39	67.5632	0.0290047	1876.34	44.6368	0.0237893	-0.311932	0.0761748	0.244203
440	he_4037	25448.8	1972.64	0.0775141	31534.1	1375.49	0.0436191	0.309316	0.0493416	0.159519
441	he_36616	39010.8	2780.9	0.0712855	31711.5	1591.45	0.0501853	-0.307991	0.0632702	0.205429
442	he_20936	6725.31	683.379	0.101613	8885.11	613.611	0.0690606	0.302714	0.0700815	0.23151
443	he_11793	2979.48	245.912	0.082535	2423.38	67.3122	0.0277762	-0.298041	0.0746839	0.250583
444	xbz_23097	3578.32	131.212	0.0366685	2911.17	11.0374	0.0037914	-0.297203	0.0583832	0.196442
445	he_39456	9106.42	517.048	0.0567784	11118.7	1262.89	0.113583	0.288028	0.0735107	0.255221
446	he_2975	30532.1	2369.56	0.0776089	37199.3	1376.26	0.0369968	0.284949	0.0575087	0.201821
447	he_25699	12655.6	599.245	0.0473501	15945.8	423.274	0.0265446	0.283224	0.0500196	0.176608
448	xbz_29013	24387.2	1383.1	0.0567142	28456.7	2453.83	0.0862303	0.275033	0.0623841	0.226824
449	xbz_15847	33737.1	2283.6	0.0676879	26530.1	1689.33	0.063676	-0.267136	0.0774452	0.289909
450	xbz_21862	34004.2	2406.82	0.07078	27251.4	1606.09	0.058936	-0.263954	0.0846473	0.32069
451	he_9646	32221.9	2322.87	0.0720897	26436.1	3864.01	0.146164	-0.262841	0.0920521	0.350219
452	he_42176	3446.68	191.287	0.0554988	2874.55	11.6817	0.00406383	-0.260762	0.0742461	0.284727
453	he_37337	15653.3	726.993	0.0464436	12380.5	562.744	0.0454542	-0.257049	0.0808045	0.314355
454	xbz_11720	6976.42	462.979	0.0663634	8332.74	293.858	0.0352655	0.256305	0.045977	0.179384
455	xbz_26095	6642.16	298.282	0.0449073	5493.78	432.823	0.0787843	-0.25055	0.0537928	0.214699
456	he_21649	7205.24	479.855	0.0665981	8559.56	161.053	0.0188155	0.248491	0.123302	0.496203
457	he_42966	2419.04	68.0998	0.0281515	2866.13	46.5349	0.0162361	0.24486	0.0640442	0.261555
458	he_30566	9091.08	722.89	0.0795165	7444.63	179.411	0.0240994	-0.243834	0.103416	0.424123
459	he_25375	27999.8	2180.36	0.0778707	23696.4	1740.9	0.0734668	-0.243532	0.0165742	0.0680577
460	he_40709	22169.8	1457.81	0.0657568	18214.3	2175.47	0.119438	-0.234303	0.0760042	0.324384
461	he_29411	34339.4	1194.05	0.034772	29220.8	54.1951	0.00185468	-0.232436	0.0474997	0.204356
462	xbz_5246	33854.1	1562.77	0.0461618	28842.6	458.081	0.0158821	-0.230449	0.0437071	0.189661
463	he_28378	33968.2	1227.88	0.0361477	29178.9	62.189	0.0021313	-0.218793	0.0552363	0.252459
464	he_47874	33423.9	2671.8	0.0799369	28823.4	1016.74	0.0352748	-0.213638	0.0641966	0.300492
465	he_46823	26579.5	2235.61	0.0841103	30790.5	1011.72	0.0328581	0.212173	0.0730705	0.344391
466	xbz_8049	3159	332.35	0.105208	2735.33	335.474	0.122645	-0.209194	0.0253213	0.121042
467	he_37854	20767.5	887.387	0.0427295	23827	1289.6	0.0541234	0.197867	0.0164573	0.0831739
468	he_47546	24804.6	2039.35	0.0822165	28267.3	1003.25	0.0354917	0.188527	0.0694637	0.368456
469	he_13758	28978.1	2440.48	0.0842183	25722.3	1878.14	0.0730161	-0.171945	0.0159923	0.0930086
470	he_27876	2500.17	169.063	0.0676208	2225.99	187.958	0.0844381	-0.168504	0.0243329	0.144406
471	he_4609	25656.6	1884.96	0.0734687	22829.8	833.936	0.0365283	-0.168409	0.0512342	0.304225
472	he_45766	30186.2	2270.44	0.0752145	26197.1	1874.2	0.0715421	-0.159745	0.0517028	0.323658
473	he_47550	23249.3	1014.22	0.0436236	25909.7	709.386	0.0273792	0.15672	0.0234507	0.149634
474	he_47558	25760.8	1507.91	0.0585352	28687.7	665.087	0.0231837	0.156299	0.0510467	0.326595
475	he_47085	32393.6	2266.85	0.0699785	29067.5	1262.69	0.0434398	-0.155212	0.03835	0.247082
476	he_47554	23353.2	1333.69	0.0571096	25954.5	227.721	0.00877386	0.153515	0.0697784	0.454539
477	he_20008	21148.4	1850.97	0.0875231	23943.8	1649.07	0.0688725	0.150576	0.0288536	0.191622
478	he_2186	18495.3	1490.35	0.0805799	16154	1944.61	0.120379	-0.148438	0.0577542	0.38908
479	he_47544	26235.1	2272.08	0.0866045	29014.8	1187.91	0.0409417	0.145291	0.0675819	0.465149
480	he_35611	24915.9	2405.56	0.0965471	27493.5	3675.22	0.133676	0.138916	0.0539266	0.388195
481	he_16726	22564.4	249.022	0.011036	24669.7	618.509	0.0250716	0.128507	0.0202526	0.157599
482	he_20968	25670.7	1986.2	0.077372	27976.6	3192.86	0.114126	0.124094	0.0517425	0.416962
483	he_49538	22167.6	1196.4	0.0539707	24014.9	408.789	0.0170223	0.116424	0.0533419	0.458167
484	he_43686	26234.8	2541.36	0.0968698	28385.7	2877.52	0.101372	0.11336	0.00652762	0.0575832
485	xbz_26118	26727.6	2770.17	0.103644	28740.2	1995	0.0694149	0.106886	0.0495708	0.463774
486	he_30317	27063.6	697.759	0.0257822	25583.4	1007.53	0.0393822	-0.0814642	0.0196313	0.240981
487	he_8779	18726.8	207.393	0.0110746	17709.9	230.167	0.0129965	-0.0805642	0.00277291	0.0344187
488	he_8520	27361.5	2938.17	0.107383	26200.2	2732.56	0.104295	-0.0623329	0.00448	0.0718722

## Sheet: 可检测转录子
Sample A							Sample B
No.	探针_ID	平均信号值	重复探针点间标准偏差	重复探针点间变异系数	可检测重复次数		No.	探针_ID	平均信号值	重复探针点间标准偏差	重复探针点间变异系数	可检测重复次数
1	chr10_D_4	20.4505	5.34943	0.26158	3 out of 3		1	he_10021	18.8617	2.36088	0.125168	3 out of 3
2	chr18_B_3	21.4036	2.99948	0.140139	2 out of 3		2	he_10106	22.2315	0.310732	0.0139771	3 out of 3
3	chr20_B_4	15.1704	0.0808528	0.00532964	2 out of 3		3	he_1011	329.519	37.8193	0.114771	3 out of 3
4	chr6_A_4	21.0919	4.34548	0.206026	3 out of 3		4	he_1012	10271.9	1189.89	0.115839	3 out of 3
5	he_10021	14.3918	3.16634	0.220009	2 out of 3		5	he_10229	11232.3	1349.46	0.120141	3 out of 3
6	he_10106	22.2341	10.3503	0.465516	2 out of 3		6	he_10363	41185.2	4319.32	0.104875	3 out of 3
7	he_1011	658.771	46.6661	0.0708381	3 out of 3		7	he_10364	16.322	2.96535	0.181678	2 out of 3
8	he_1012	9033.05	531.974	0.0588919	3 out of 3		8	he_10527	22358.7	2168.06	0.0969672	3 out of 3
9	he_10229	14313.5	1734.1	0.121152	3 out of 3		9	he_10552	128.898	7.94043	0.0616027	3 out of 3
10	he_10363	12079.4	629.342	0.0521005	3 out of 3		10	he_10636	22.7316	3.40377	0.149737	3 out of 3
11	he_10364	24.9588	6.94069	0.278086	3 out of 3		11	he_11072	18.5406	6.452	0.347993	2 out of 3
12	he_10527	23191.3	1904.72	0.0821307	3 out of 3		12	he_11181	8766.28	595.457	0.0679258	3 out of 3
13	he_10636	18.9434	6.02323	0.317959	2 out of 3		13	he_11413	143.295	2.11118	0.0147331	3 out of 3
14	he_11072	20.2432	3.07288	0.151798	2 out of 3		14	he_11415	166.762	23.8408	0.142963	3 out of 3
15	he_11181	6466.96	697.384	0.107838	3 out of 3		15	he_11517	15.29	1.74014	0.11381	3 out of 3
16	he_11413	24.5439	11.8571	0.483099	2 out of 3		16	he_11553	127.264	4.58924	0.0360607	3 out of 3
17	he_11415	20.6614	12.4881	0.604414	2 out of 3		17	he_11555	391.586	30.7942	0.0786395	3 out of 3
18	he_11553	40.6503	9.36137	0.23029	3 out of 3		18	he_11751	13.0473	1.06752	0.0818195	3 out of 3
19	he_11555	205.326	17.956	0.087451	3 out of 3		19	he_11793	2446.08	67.3122	0.0275184	3 out of 3
20	he_11751	21.1167	8.53322	0.404099	2 out of 3		20	he_12052	17.4986	4.17318	0.238486	3 out of 3
21	he_11793	3060.18	245.912	0.0803585	3 out of 3		21	he_12202	563.36	52.5938	0.0933574	3 out of 3
22	he_12052	22.1679	1.63009	0.073534	2 out of 3		22	he_12203	19.7648	0.243875	0.0123389	3 out of 3
23	he_12202	752.798	44.7555	0.0594523	3 out of 3		23	he_12204	11340.8	957.396	0.0844206	3 out of 3
24	he_12203	46.1287	10.1235	0.219462	3 out of 3		24	he_12546	11.8322	3.85173	0.325531	2 out of 3
25	he_12204	4563.36	244.999	0.0536883	3 out of 3		25	he_12588	54.332	4.62031	0.0850385	2 out of 3
26	he_129	29.7521	8.59983	0.289049	3 out of 3		26	he_129	100.554	5.80169	0.0576976	3 out of 3
27	he_13117	5377.37	270.469	0.0502976	3 out of 3		27	he_13117	5559.1	341.607	0.06145	3 out of 3
28	he_13183	149.016	36.5616	0.245354	3 out of 3		28	he_13183	207.53	2.7112	0.0130641	3 out of 3
29	he_13388	341.398	29.7057	0.0870118	3 out of 3		29	he_13388	286.944	27.499	0.0958343	3 out of 3
30	he_13555	19114.3	1643.12	0.0859628	3 out of 3		30	he_13555	25147.6	1712.12	0.0680828	3 out of 3
31	he_13758	30199	2440.48	0.0808134	3 out of 3		31	he_13758	26762.9	1878.14	0.0701769	3 out of 3
32	he_138	16.1843	3.36753	0.208073	3 out of 3		32	he_138	38.5855	6.29812	0.163225	3 out of 3
33	he_13856	23924.5	2053.48	0.0858315	3 out of 3		33	he_13856	10636.9	450.937	0.0423936	3 out of 3
34	he_13939	2863.32	315.868	0.110315	3 out of 3		34	he_13939	1910.43	82.572	0.0432216	3 out of 3
35	he_14017	35470.1	2813.15	0.0793105	3 out of 3		35	he_14017	27104.5	1844.19	0.06804	3 out of 3
36	he_14115	462.076	36.8187	0.079681	3 out of 3		36	he_14115	1381.93	12.3362	0.00892679	3 out of 3
37	he_14371	22.4007	9.67954	0.432108	2 out of 3		37	he_14371	26.2593	2.87706	0.109563	3 out of 3
38	he_14382	24.8673	0.569017	0.0228821	2 out of 3		38	he_14382	16.8711	1.86521	0.110557	3 out of 3
39	he_14386	146.993	29.2012	0.198658	3 out of 3		39	he_14386	8043.95	232.174	0.0288633	3 out of 3
40	he_14393	32.8306	8.30419	0.25294	2 out of 3		40	he_14393	1033.06	34.8586	0.0337431	3 out of 3
41	he_14400	17.0281	5.84814	0.343439	2 out of 3		41	he_14400	15.2121	1.43608	0.0944039	2 out of 3
42	he_14423	632.729	46.27	0.0731277	3 out of 3		42	he_14422	18.8183	4.41306	0.23451	2 out of 3
43	he_1492	314.619	34.0041	0.10808	3 out of 3		43	he_14423	847.555	26.1243	0.0308231	3 out of 3
44	he_1493	1910.25	142.575	0.0746369	3 out of 3		44	he_1492	396.135	24.4808	0.0617991	3 out of 3
45	he_15138	16.1619	0.536219	0.0331779	2 out of 3		45	he_1493	4057.82	243.156	0.0599227	3 out of 3
46	he_15140	2946.69	209.849	0.0712154	3 out of 3		46	he_15138	72.5401	7.87088	0.108504	3 out of 3
47	he_15142	6022.76	429.941	0.071386	3 out of 3		47	he_15140	2469.49	25.6805	0.0103991	3 out of 3
48	he_15201	16.088	4.02101	0.249939	2 out of 3		48	he_15142	18820.7	518.379	0.027543	3 out of 3
49	he_15370	253.773	25.0569	0.0987375	3 out of 3		49	he_15201	29.7433	1.63103	0.0548369	3 out of 3
50	he_15397	78.6713	14.8636	0.188933	3 out of 3		50	he_15370	200.364	18.1165	0.0904179	3 out of 3
51	he_15398	150.463	24.2296	0.161034	3 out of 3		51	he_15397	85.2163	3.84105	0.0450741	3 out of 3
52	he_15588	22114.8	2584.19	0.116853	3 out of 3		52	he_15398	182.617	3.42382	0.0187486	3 out of 3
53	he_15624	309.104	50.9727	0.164905	3 out of 3		53	he_15588	8279.48	757.883	0.0915374	3 out of 3
54	he_15651	8549.84	383.752	0.0448841	3 out of 3		54	he_15624	571.726	28.2993	0.0494981	3 out of 3
55	he_15653	5567.26	327.296	0.0587895	3 out of 3		55	he_15651	24701.6	2586.4	0.104706	3 out of 3
56	he_15724	26723.9	2102.95	0.0786916	3 out of 3		56	he_15653	15580.5	669.54	0.0429729	3 out of 3
57	he_1586	18663.8	2080.94	0.111496	3 out of 3		57	he_15724	45643.6	2862.96	0.0627242	3 out of 3
58	he_16205	68.1073	8.22534	0.12077	3 out of 3		58	he_1586	10652.1	1288.14	0.120927	3 out of 3
59	he_16206	117.155	6.94053	0.0592425	3 out of 3		59	he_16205	173.078	15.0942	0.0872104	3 out of 3
60	he_16349	25.4729	5.36606	0.210658	2 out of 3		60	he_16206	53.4237	6.7624	0.12658	3 out of 3
61	he_16687	21.0966	10.4273	0.494262	2 out of 3		61	he_16289	11.4055	3.34418	0.293208	2 out of 3
62	he_16726	23671.3	1925.35	0.0813369	3 out of 3		62	he_16347	49.3306	4.84816	0.0982789	3 out of 3
63	he_16732	17.0932	2.31158	0.135234	2 out of 3		63	he_16349	1804.58	14.3788	0.00796797	3 out of 3
64	he_16755	5233.47	304.998	0.0582784	3 out of 3		64	he_16687	12.2362	1.15419	0.0943253	3 out of 3
65	he_17153	2637.45	136.219	0.0516481	3 out of 3		65	he_16726	25421.1	1373.07	0.0540129	3 out of 3
66	he_17291	2125.67	289.501	0.136193	3 out of 3		66	he_16755	693.639	44.7836	0.0645633	3 out of 3
67	he_17301	21.5007	7.08547	0.329546	3 out of 3		67	he_17153	5213.8	310.507	0.0595548	3 out of 3
68	he_17407	44.3566	7.34639	0.165621	2 out of 3		68	he_17154	16.1706	4.1799	0.258488	2 out of 3
69	he_17441	30.9877	4.27111	0.137833	2 out of 3		69	he_17291	1957.55	164.609	0.0840892	3 out of 3
70	he_17477	479.876	30.121	0.0627683	3 out of 3		70	he_17407	323.674	21.9678	0.0678702	3 out of 3
71	he_17478	78.1318	15.7302	0.201329	3 out of 3		71	he_17441	2060.12	52.4542	0.0254618	3 out of 3
72	he_17857	605.703	45.8956	0.0757725	3 out of 3		72	he_17477	625.759	50.7559	0.081111	3 out of 3
73	he_18076	14.0481	1.48911	0.106	2 out of 3		73	he_17478	86.0308	7.84729	0.0912149	3 out of 3
74	he_18129	130.96	13.9674	0.106654	2 out of 3		74	he_17857	455.424	29.9634	0.0657923	3 out of 3
75	he_18225	35019.9	2808.92	0.0802092	3 out of 3		75	he_18076	38.6497	7.37728	0.190876	3 out of 3
76	he_18278	35852.9	3091.97	0.0862405	3 out of 3		76	he_18129	787.212	27.8999	0.0354414	3 out of 3
77	he_18422	18.2575	5.49714	0.30109	2 out of 3		77	he_18225	27219.4	1669.93	0.061351	3 out of 3
78	he_18518	28.6795	8.98933	0.313441	3 out of 3		78	he_18278	27266.9	1854.57	0.0680154	3 out of 3
79	he_18859	25.5017	5.58289	0.218923	3 out of 3		79	he_18518	44.6853	4.62244	0.103444	3 out of 3
80	he_18955	25.3874	5.59443	0.220363	2 out of 3		80	he_18955	112.439	7.8671	0.0699677	3 out of 3
81	he_19075	38.2123	5.89655	0.154311	2 out of 3		81	he_19075	20.8364	0.0156048	0.000748919	2 out of 3
82	he_19342	15.2896	0.257106	0.0168158	2 out of 3		82	he_19454	1407.88	59.5687	0.0423108	3 out of 3
83	he_19454	2453.75	176.69	0.0720079	3 out of 3		83	he_19455	2965.76	93.8728	0.0316523	3 out of 3
[truncated: 732 more rows]
