# Supplementary material for: Distinct MicroRNA Subcellular Size and Expression Patterns in Human Cancer Cells
Source: Int J Cell Biol. 2012 Feb 12;2012:672462. doi: 10.1155/2012/672462 (PMC3296955; doi:10.1155/2012/672462)
Supplement: Supplementary file 3 [file 672462.f3.xls]

## Sheet: 文件信息
数据报告
数据信息
布局文件	miRHuman_10.1_AUR_0080314.xls
原始图像文件	03_AUR_081284-0711-Chen-5+6-390-475.tif
处理后图像A文件	03_AUR_081284-0711-Chen-5+6-390cy3.tif
处理后图像B文件	03_AUR_081284-0711-Chen-5+6-475cy5.tif
数据处理软件	ArrayPro
过滤条件	Morphological filter, Open, 3×3 Cross, 2 passes
实验信息
实验日期	2008-07-11
芯片 ID	03_AUR_081284
样品来源	Aurevexi
样品 A
样品 ID	5
收样日期	2008-03-14
标记染料	Cy3
样品 B
样品 ID	6
收样日期	2008-03-14
标记染料	Cy5
数据采集条件
扫描仪	Axon GenePix 4000B Microarray Scanner
像素尺寸	10 µm
样品 A 增益	390
样品 B 增益	475
数据分析信息
样品 A 背景值	188
样品 A 背景标准偏差	8.54505
样品 B 背景值	30.3704
样品 B 背景标准偏差	1.17972
归一化方法	Global Normalization
客户信息
机构名称	Aurevexi
定单信息
收单日	2008-03-14
客户 PO Number
销售定单 No.	2319-S81191
支持信息
技术联系	Customer Support
电话	713-664-7087
Email	support@lcsciences.com

## Sheet: 显著差异数值
No.	探针_ID	Sample A 信号中值	Sample B 信号中值	log2 (Sample B / Sample A)
1	he_1011	744.279	102.531	-2.85978
2	he_1012	947.051	611.541	-0.630824
3	he_10229	487.417	230.939	-1.08782
4	he_10363	32679.9	71075.8	1.14965
5	he_10527	7436.79	4476	-0.732423
6	he_10552	13.8163	323.599	4.54976
7	he_10636	172.807	338.513	0.970052
8	he_11181	2058.35	189.811	-3.43886
9	he_11413	22.4506	558.355	4.61513
10	he_11415	16.8143	376.46	4.48474
11	he_11553	711.528	5554.34	2.96462
12	he_11555	1491.28	6400.78	1.94654
13	he_11793	5705.47	4549.03	-0.326788
14	he_12202	1868.56	5986.22	1.66189
15	he_12203	55.1719	192.126	1.80863
16	he_12204	7861.58	15694.7	1.02089
17	he_129	23.5931	307.235	3.70291
18	he_13388	313.326	857.258	1.20454
19	he_13555	5884.4	1644.63	-1.83913
20	he_13758	11452.1	5258.32	-1.13208
21	he_13856	12469	815.218	-3.93501
22	he_14017	27185.9	11729	-1.24791
23	he_14115	2884.02	7921.58	1.34152
24	he_14386	149.43	6507	5.44445
25	he_14393	20.5755	1056.65	5.68243
26	he_14422	48.7572	214.983	2.14053
27	he_14423	3511.06	21197.3	2.51394
28	he_1492	238.972	87.9484	-1.52749
29	he_1493	2244.49	6023.16	1.40489
30	he_15140	230.549	901.055	1.87981
31	he_15142	9565.6	27077.2	1.36063
32	he_15370	602.299	1927.24	1.66402
33	he_15398	206.279	821.773	1.955
34	he_15588	10318.2	197.697	-5.76753
35	he_15624	280.511	525.513	0.849557
36	he_15651	11348.3	30948.6	1.47926
37	he_15653	8824.02	24748.9	1.46517
38	he_15724	30315.4	27897.7	-0.118881
39	he_1586	9011.43	4460.2	-0.938288
40	he_16347	5.88835	129.766	4.50205
41	he_16349	40.6095	2826.28	6.06553
42	he_16726	6325.67	2869.83	-1.23013
43	he_17153	4726.01	35121.5	2.74013
44	he_17291	4259.56	1437.92	-1.60363
45	he_17407	34.7173	749.864	4.4329
46	he_17441	107.059	10092	6.55866
47	he_17477	760.084	1730.34	1.20364
48	he_17478	155.085	360.746	1.2345
49	he_17857	992.562	620.151	-0.750156
50	he_18129	528.845	95.6158	-2.46752
51	he_18225	20969.8	9167.75	-1.23729
52	he_18278	25328	11776.8	-1.17021
53	he_18955	578.786	226.889	-1.37393
54	he_19454	7992.04	1830.15	-2.21435
55	he_19742	21605.3	9688.31	-1.17718
56	he_1991	18745.2	8610.75	-1.17241
57	he_20008	5535.88	2472.97	-1.17634
58	he_20151	16065.5	6454.25	-1.31636
59	he_20180	1587.77	726.782	-1.12741
60	he_20181	1259.15	88.3106	-3.88256
61	he_20271	1241.76	310.417	-2.0166
62	he_2031	13185.2	800.222	-4.00589
63	he_20374	9707.43	31447	1.56468
64	he_2066	168.322	22.8778	-2.78167
65	he_20896	4399.72	2766.21	-0.676052
66	he_20919	7568.39	2114.27	-1.81319
67	he_20922	112.456	28.0143	-1.97472
68	he_20936	679.914	249.126	-1.48733
69	he_20939	6050.56	574.989	-3.35088
70	he_20968	8104.98	3074.11	-1.4224
71	he_21018	438.104	83.6319	-2.47164
72	he_21059	28.842	2569.92	6.4585
73	he_21561	35131.5	18901.1	-0.894299
74	he_21566	10191.6	816.438	-3.63879
75	he_21594	69.7831	423.347	2.84382
76	he_2174	1499.83	182.662	-2.99077
77	he_21871	1	1742.06	10.7645
78	he_21872	47.1653	1504.38	4.88631
79	he_21873	127.724	6746.19	5.72808
80	he_21878	1183.23	370.018	-1.67706
81	he_21967	5308.79	1990.31	-1.57403
82	he_22155	7.07142	96.8041	3.775
83	he_22404	7.90526	205.369	5.08806
84	he_22545	4.71171	77.6511	4.09944
85	he_22725	2315.92	1373.71	-0.785811
86	he_23347	1003.99	442.693	-1.18137
87	he_23413	12541.5	2720.86	-2.2282
88	he_23428	5947.63	2674.57	-1.15301
89	he_23458	877.684	485.78	-1.01753
90	he_2348	5606.51	595.65	-3.20702
91	he_23737	229.9	69.0768	-1.73473
92	he_2388	2072.09	391.608	-2.347
93	he_24	9290.71	19864.9	1.00684
94	he_24277	8.1115	154.842	4.23648
95	he_24403	728.29	377.338	-0.942311
96	he_24677	186.478	1545.32	3.01808
97	he_24979	1071.53	1711.38	0.675491
98	he_24981	6722.48	4729.91	-0.534962
99	he_25	398.988	3026.18	2.93185
100	he_25080	13099.5	31592.7	1.23202
101	he_25081	7363.96	20042.9	1.30325
102	he_25083	11870.7	29199.4	1.23419
103	he_25098	249.372	80.509	-1.41288
104	he_25099	13665	53325.9	1.81862
105	he_25100	582.754	169.816	-1.91032
106	he_25101	12401.3	43704.6	1.75024
107	he_25103	11345.5	45417.8	1.96854
108	he_25328	132.021	381.896	1.52354
109	he_25375	5772.52	2438.2	-1.26681
110	he_25409	3393.84	14595.2	2.05871
111	he_25586	35.4624	1917.28	5.74489
112	he_25588	19.7591	831.537	5.3844
113	he_25668	20307.1	8085.62	-1.25028
114	he_25669	1407.66	232.009	-2.60104
115	he_25673	1350.03	276.938	-2.45457
116	he_25674	4562.97	364.717	-3.70211
117	he_25676	1479.43	356.835	-2.05172
118	he_25688	284.508	86.749	-1.71355
119	he_25699	10873.2	6869.44	-0.666232
120	he_25704	845.921	85.6361	-3.32676
121	he_25712	9829.41	1290	-2.87025
122	he_25753	622.065	1048.31	0.752923
123	he_25776	10264	3539.06	-1.57432
124	he_25777	181.46	27.9341	-2.69955
125	he_26104	1859.52	784.333	-1.21319
126	he_26137	10439.7	892.358	-3.5655
127	he_26246	21143.4	4882.83	-2.13841
128	he_26307	19119.6	25450.6	0.429339
129	he_26540	23848.4	6596.3	-1.80773
130	he_26559	627.092	84.8345	-2.85502
131	he_26755	802.476	5580.66	2.84006
132	he_27079	23.6222	595.17	4.76545
133	he_27218	5718.74	408.93	-3.73937
134	he_27523	65.987	437.729	2.79685
135	he_27671	2963.85	2194.65	-0.422902
136	he_27706	7823.42	3268.8	-1.2541
137	he_27876	2500.83	949.368	-1.48758
138	he_28378	15638.7	6185.89	-1.35722
139	he_28451	10238.6	1035.74	-3.25838
140	he_28473	80.7171	19781.9	7.93709
141	he_28474	510.222	37403.6	6.19181
142	he_28476	159.111	10502.3	6.17647
143	he_28480	426.348	16176.4	5.33342
144	he_28482	488.261	28656.8	5.90122
145	he_28483	29.6661	1931.62	6.15115
146	he_28711	2784.8	11723.3	2.00033
147	he_28713	1680.06	10021.7	2.61463
148	he_28825	2179.69	16960.6	3.00856
149	he_28827	472.197	15861.2	5.02688
150	he_28866	14935.8	4948.2	-1.54972
151	he_28961	2602.72	716.9	-1.79211
152	he_28969	8056.54	138.713	-5.85999
153	he_29126	7257.09	2391.87	-1.56691
154	he_2914	4711.61	1322.75	-1.83765
155	he_29304	4619.48	691.458	-2.64947
156	he_2937	44.323	2304.08	5.69999
157	he_29411	14281.1	5189.84	-1.40162
158	he_29521	26695	63895	1.18128
159	he_29648	7504.38	906.428	-3.01378
160	he_2975	22137.2	13754.2	-0.725266
161	he_29964	11403.3	856.898	-3.73418
162	he_29970	4367.08	23497	2.50297
163	he_30317	7060.35	3169.4	-1.15553
164	he_30405	233.447	1118.85	2.24688
165	he_30566	8009.43	973.068	-2.99947
166	he_30695	22230.5	15098.3	-0.648978
167	he_30831	8780.93	3343.75	-1.42446
168	he_30884	5415.26	1485.62	-1.91698
169	he_30889	6588.24	5093.9	-0.367594
170	he_30905	3824.68	2422.85	-0.718605
171	he_31014	1123.14	2879.64	1.26914
172	he_31018	70.6318	600.346	3.08428
173	he_31019	1	236.548	7.87771
174	he_31029	34.4342	2204.56	5.82386
175	he_31030	143.204	15568.6	6.63961
176	he_31031	30.9547	3122.03	6.52266
177	he_31032	170.172	14003.6	6.42267
178	he_31033	16.4854	497.735	4.91612
179	he_31035	19107	7720.77	-1.31387
180	he_31077	49.1663	184.622	1.90647
181	he_31383	31.157	540.819	4.0825
182	he_31641	10334	25668	1.30643
183	he_31698	682.317	80.2318	-3.13548
184	he_32	1349.01	76.0168	-4.16487
185	he_32353	86.1988	3823.46	5.33372
186	he_32394	10627	29088.6	1.45027
187	he_32726	5563.7	2332.65	-1.25646
188	he_33216	7414.73	4558.04	-0.819885
189	he_33220	3124.21	1456.11	-1.10138
190	he_3332	5480.54	14632.1	1.41674
191	he_33592	5282.83	34987.1	2.72744
192	he_33594	858.232	8416.7	3.26017
193	he_33647	11525.3	1031.54	-3.62753
194	he_33649	5902.48	298.084	-4.36146
195	he_34254	2451.01	1449.94	-0.769447
196	he_35178	7719.62	272.701	-4.79341
197	he_35232	1027.12	617.444	-0.695786
198	he_35269	17.5445	773.441	5.4622
199	he_35559	1884.34	391.078	-2.37511
200	he_35606	19991.8	4264.25	-2.22294
201	he_35611	1749.26	199.749	-3.20125
202	he_35750	8632	3466.22	-1.28542
203	he_360	2.12437	111.324	5.79461
204	he_36376	941.031	14860.3	3.91091
205	he_36377	207.168	704.83	1.76648
206	he_365	125.793	3054.44	4.60178
207	he_36506	168.43	506.219	1.65352
208	he_36543	188.637	62.0514	-1.62343
209	he_36553	45.9289	251.09	2.45073
210	he_36556	437.313	152.486	-1.50752
211	he_36597	1372.91	90.7061	-3.92018
212	he_36616	14774.9	7006.43	-1.11588
213	he_36788	1231.61	856.82	-0.515057
214	he_36832	9981.46	6345.33	-0.666804
215	he_36910	19200.5	7343.05	-1.41161
216	he_3702	217.721	74.2767	-1.5484
217	he_37052	116.113	270.14	1.21818
218	he_37317	12636.6	6415.35	-1.12271
219	he_37851	10027.1	703.571	-4.03123
220	he_37854	8124.48	6706	-0.272565
221	he_37889	120.745	5477.46	5.50348
222	he_37892	61.9447	3802.86	5.82898
223	he_38204	63.3819	3043.58	5.57175
224	he_38247	6426.96	1466.98	-2.08676
225	he_38407	11162.6	47017.9	1.94929
226	he_38408	228.429	58.0202	-1.95779
227	he_38409	14164.1	53654	1.91141
228	he_38410	355.203	181.511	-0.830406
229	he_38575	26215.5	10968.7	-1.25703
230	he_38577	10303.7	6092.99	-0.761294
231	he_38583	9540.02	2426.58	-1.97507
232	he_38587	11252.6	3155.47	-1.83655
233	he_38779	829.874	269.326	-1.58733
234	he_38904	12347.8	10711.4	-0.205113
235	he_39302	16444.6	4538.09	-1.84345
236	he_39456	712.841	423.737	-0.750412
237	he_39736	5525.62	311.707	-4.12235
238	he_39883	18824	6266.59	-1.55736
239	he_40110	6760.77	2672.73	-1.33887
240	he_40142	9522.93	4116.26	-1.17773
241	he_40162	3734.84	1959.87	-0.93029
242	he_40174	1850.49	1218.88	-0.646272
243	he_40343	30316.2	18188	-0.736154
244	he_4037	7272.4	5906.14	-0.297389
245	he_40709	3190.07	565.645	-2.47925
246	he_40719	29203.8	17186	-0.755523
247	he_40953	6597.39	3604.59	-0.89398
248	he_40976	37.7511	206.643	2.47365
249	he_41210	2138.54	92.2688	-4.36648
250	he_41259	12640.2	804.853	-3.99251
251	he_41264	37.7396	952.666	4.71377
252	he_41333	4857.88	296.406	-4.07594
253	he_41514	105.93	13.3785	-2.96248
254	he_41519	112.457	17.4911	-2.63184
255	he_41735	2647.72	8017.15	1.64848
256	he_4201	347.422	2618.35	2.84607
257	he_42176	4.98293	95.3703	4.27641
258	he_42311	37.8375	424.625	3.3863
259	he_42318	43.8763	981.204	4.56808
260	he_4234	3467.14	968.526	-1.83988
261	he_42549	6243.29	556.217	-3.48859
262	he_42966	4037.93	13881.2	1.71537
263	he_43060	6214.73	18644.4	1.56931
264	he_43348	4083.03	1864.69	-1.22032
265	he_43686	10308.5	3692.29	-1.49456
266	he_43853	6985.62	4665.54	-0.577718
267	he_44379	2281.79	86.9938	-4.64487
268	he_444	12818.6	6983.61	-0.887305
269	he_44807	1796.26	528.453	-1.76515
270	he_4491	186.427	56.1788	-1.73096
271	he_45012	24044.1	7775.78	-1.52868
272	he_45766	12517.6	4760.14	-1.39388
273	he_46034	10119.1	396.227	-4.67462
274	he_4609	2002.07	379.275	-2.43668
275	he_46242	29221.9	5009.79	-2.54423
276	he_4625	23.9503	210.142	3.22297
277	he_46408	17422.1	11056.6	-0.695529
278	he_46744	66.2796	4509.09	6.08813
279	he_46823	20166.8	9640.33	-1.09837
280	he_46887	543.504	1247.98	1.04567
281	he_47036	3038.64	19449.7	2.60069
282	he_47085	14879.1	7885.58	-0.981653
283	he_47213	12055.3	4945.26	-1.36668
284	he_4723	8071.85	5381.94	-0.603559
285	he_47479	1317.05	347.65	-1.95679
286	he_47496	6513.55	1085.87	-2.64576
287	he_47498	4490.08	2098.03	-1.1362
288	he_47505	5465.02	3450.43	-0.789606
289	he_47514	4823.06	1331.11	-1.93769
290	he_47515	1385.46	59.8606	-4.66744
291	he_47519	3226.44	2395.79	-0.425762
292	he_47544	9116.37	3468.17	-1.43877
293	he_47546	8067.12	2721.01	-1.60951
294	he_47550	7585.34	3370.45	-1.15873
295	he_47551	850.475	275	-1.74778
296	he_47552	8051.54	3651.86	-1.1537
297	he_47554	7006.24	2977.9	-1.21625
298	he_47558	9496.82	3657.46	-1.40055
299	he_47874	13322.9	4789.62	-1.468
300	he_48015	1728.05	372.522	-2.1866
301	he_48076	1710.79	13216.1	2.86176
302	he_48830	38.4762	370.11	3.18312
303	he_4902	317.283	34.3354	-3.23071
304	he_4926	34.1942	226.421	2.63468
305	he_49538	5577.58	2396.07	-1.21341
306	he_49593	39.3992	173.601	2.1402
307	he_49594	1384.02	6991.36	2.31936
308	he_49595	175.581	548.928	1.63244
309	he_49596	1380.76	9123.09	2.66259
310	he_4967	9704.48	489.681	-4.33386
311	he_49808	4505.28	10647	1.18387
312	he_49811	58.8653	766.742	3.6637
313	he_49813	3077.85	6564.72	1.17428
314	he_49836	6442.54	35576.7	2.52992
315	he_49840	481.669	120.07	-1.96113
316	he_50065	3916.89	829.46	-2.21452
317	he_50323	3264.5	9232.77	1.4999
318	he_50521	10381.3	674.221	-3.91858
319	he_5069	136.273	1875.73	3.71452
320	he_50707	8432.25	4488.99	-0.997843
321	he_50723	5994.12	62.5099	-6.47992
322	he_50815	10739.7	776.276	-3.78404
323	he_5126	22065.2	10076.4	-1.22723
324	he_51342	5721.09	20003	1.86529
325	he_51344	1524.25	9906.36	2.69882
326	he_5138	1293.3	245.189	-2.38326
327	he_51417	492.353	1499.38	1.47632
328	he_51418	2406.34	4910.06	1.02189
329	he_51788	20.992	1352.66	6.00982
330	he_51830	9.84121	299.158	4.92593
331	he_51888	9886.37	682.514	-3.81978
332	he_52010	148.694	347.042	1.23892
333	he_52022	773.769	386.951	-0.999752
334	he_52106	3094.4	1527.96	-0.996528
335	he_52245	10851	872.08	-3.62602
336	he_5226	12894.2	35624.3	1.46614
337	he_52487	74.7205	15.418	-2.28024
338	he_52701	1654.15	946.034	-0.806123
339	he_52854	8815.42	3884.94	-1.2866
340	he_52875	141.848	650.843	2.14132
341	he_52910	23181.3	12312.1	-0.936609
342	he_52927	15934.4	5991.3	-1.42364
343	he_53032	9892.19	36309.9	1.9125
344	he_53033	217.575	416.176	0.935662
345	he_53034	7528.67	34621.5	2.19491
346	he_531	682.676	8234.08	3.60896
347	he_53109	1845.95	4016.45	1.12156
348	he_53133	9090.57	20765.3	1.257
349	he_53189	24636.4	21106	-0.237282
350	he_53286	269.236	563.749	1.14996
351	he_53287	2559.79	6658.12	1.39299
352	he_5346	15244.7	9205.41	-0.818793
353	he_53548	85.6679	366.057	1.93131
354	he_53589	1728.23	5829.66	1.76439
355	he_53591	232.786	620.704	1.51177
356	he_5626	49.1723	445.108	3.17662
357	he_5651	5281.32	1499.35	-1.9271
358	he_5727	8522.89	25662.8	1.57544
359	he_593	95.0896	4747.5	5.64174
360	he_596	30.87	850.334	4.78375
361	he_598	44.9485	1494.32	5.01099
362	he_6015	178.775	1310.23	2.87048
363	he_6041	28665.8	16701.4	-0.785889
364	he_6831	3329.83	19107	2.5091
365	he_6833	140.823	682.599	2.2152
366	he_6835	264.074	7079.04	4.80573
367	he_6836	2858.57	15705.7	2.37796
368	he_6842	4912.43	14161.9	1.45519
369	he_7041	31593.8	24264.7	-0.363099
370	he_7043	4631.99	2180.83	-1.05705
371	he_7253	2772.02	1596.88	-0.758702
372	he_7363	27236.2	2207.97	-3.67641
373	he_7822	49.8269	213.263	1.87941
374	he_810	14.9161	1151.9	6.30747
375	he_8209	679.59	63.9299	-3.4101
376	he_8520	11055.3	4881.56	-1.18366
377	he_8535	233.977	620.553	1.40719
378	he_8774	469.346	184.976	-1.33782
379	he_8776	35456.6	25411.6	-0.470663
380	he_8778	37859.4	28751.9	-0.396992
381	he_8779	10355.2	9122.83	-0.179043
382	he_8862	314.912	670.853	1.09105
383	he_9047	4236.22	1328.5	-1.62785
384	he_9049	16921.7	6688.45	-1.40431
385	he_9053	1842.62	472.065	-1.9647
386	he_9058	2224.99	830.696	-1.32461
387	he_9059	2247.78	439.228	-2.34931
388	he_9068	14805.5	19867.4	0.302086
389	he_9090	692.347	271.577	-1.33218
390	he_9307	295.635	953.133	1.61485
391	he_9463	226.281	8080.01	5.14546
392	he_9634	15223.5	8032.64	-0.94065
393	he_9637	177.429	36.8806	-2.22545
394	he_9638	185.299	35.6706	-2.35338
395	he_9646	16320	5380.73	-1.61033
396	he_9720	39.2943	2732.4	5.96674
397	he_9721	146.274	7386.73	5.65819
398	he_9772	5482.21	4557.73	-0.297716
399	he_9775	875.832	256.042	-1.77557
400	he_9776	4893.97	507.781	-3.27279
401	he_981	86.5212	5348.27	5.96583
402	he_9860	452.122	1102.56	1.28608
403	he_9882	12872.2	888.386	-3.86812
404	TU100,TU232	146.824	37.8628	-1.95523
405	TU126_1	120.711	21.0809	-2.94146
406	TU206	637.718	149.754	-2.09032
407	TU285	4758.83	464.978	-3.25891
408	TU315	482.089	83.6401	-2.52707
409	TU327	409.011	79.4576	-2.0958
410	TU371	99.8286	18.4635	-2.4286
411	TU452	256.559	54.6504	-2.0655
412	TU56	17078.1	521.631	-5.00016
413	TU600	877.567	48.845	-4.18116
414	TU757	434.88	44.5922	-3.55366
415	TU79	1327.57	307.203	-2.12089
416	xbz_1041	136.02	26.924	-2.27297
417	xbz_10532	2057.87	1215	-0.760192
418	xbz_10964	1135.77	268.677	-2.13498
419	xbz_11018	3541.57	997.883	-1.84091
420	xbz_11034	11631.5	29749.7	1.40595
421	xbz_11316	8925.59	2295.12	-2.01641
422	xbz_11688	2458.67	1261.74	-0.93648
423	xbz_11894	3294.03	601.534	-2.54777
424	xbz_12	7278.93	14326.9	0.889635
425	xbz_1241	534.589	224.58	-1.22557
426	xbz_12548	2323.91	113.146	-4.36423
427	xbz_12775	23559.8	15270.7	-0.625559
428	xbz_12781	6625.98	2597.22	-1.32234
429	xbz_13680	4363.71	2816.89	-0.798921
430	xbz_13753	12955.1	29695.4	1.24471
431	xbz_13754	7974.55	20028.2	1.28188
432	xbz_13756	10151.4	23049.7	1.18308
433	xbz_13760	249.78	75.1398	-1.73019
434	xbz_13761	16229.5	55230.7	1.69556
435	xbz_13762	588.242	172.177	-1.91627
436	xbz_13763	12327.9	44048.6	1.7909
437	xbz_13765	12032.6	44605.4	1.89648
438	xbz_13871	93.2978	278.978	1.62519
439	xbz_13911	3489.72	14524.9	1.93832
440	xbz_14049	23739	13467.5	-0.788034
441	xbz_14050	663.474	151.268	-2.19348
442	xbz_14070	904.814	136.683	-2.62512
443	xbz_14076	16806.4	7862.91	-1.02751
444	xbz_14113	804.755	30.8637	-4.68905
445	xbz_14128	9630.54	3040.65	-1.69507
446	xbz_14130	4236.57	1901.02	-1.16253
447	xbz_14512	73.8609	203.187	1.32829
448	xbz_14675	20161.6	5959.9	-1.71809
449	xbz_14983	17272.5	6688.64	-1.47503
450	xbz_15144	37.0151	408.283	3.46338
451	xbz_15227	6748.17	2042.15	-1.7244
452	xbz_15625	11863.7	1213.38	-3.28349
453	xbz_15821	1734.28	15918.4	3.09671
454	xbz_15823	386.687	14712.9	5.12953
455	xbz_15847	18514.3	5623.47	-1.71911
456	xbz_16233	31928.5	65180.1	1.03083
457	xbz_16514	3715.34	22150.2	2.57576
458	xbz_16624	450.766	275.114	-0.717405
459	xbz_16788	175.466	1191.11	2.5741
460	xbz_17038	11403.1	3910.99	-1.5798
461	xbz_17152	49.1134	176.582	1.84615
462	xbz_1728	4930.96	11778.9	1.25626
463	xbz_17454	10283.9	28544	1.35855
464	xbz_18521	829.924	8066.19	3.17547
465	xbz_19	1637.56	665.802	-1.29838
466	xbz_20066	959.4	14457.2	3.91351
467	xbz_20067	152.382	519.734	1.61672
468	xbz_20363	71.0012	216.745	1.61395
469	xbz_20511	5516.28	1432.61	-1.92672
470	xbz_21085	11633.6	46171.8	1.88747
471	xbz_21086	215.327	58.5424	-2.2491
472	xbz_21087	16005.4	56227.5	1.81272
473	xbz_2177	328.562	2382.87	2.77661
474	xbz_21862	17578.4	6127.3	-1.56648
475	xbz_22825	3282.35	9431.05	1.48528
476	xbz_2283	131.923	31.8006	-2.02879
477	xbz_23504	3654.96	12764.3	1.80418
478	xbz_23536	6985.91	18366.4	1.36352
479	xbz_23915	10313.4	3652.57	-1.51958
480	xbz_250	809.089	8644.12	3.36944
481	xbz_25639	4996.3	1131.64	-2.14722
482	xbz_25711	636.249	1422.81	1.11104
483	xbz_25897	13232.9	5096.31	-1.39448
484	xbz_26076	7082.31	1274.63	-2.59545
485	xbz_26095	3446.2	159.417	-4.48676
486	xbz_26118	10310.6	3642.61	-1.52595
487	xbz_26123	9332.61	4017.44	-1.26717
488	xbz_26125	9223.08	3893.09	-1.26572
489	xbz_26127	7922.42	3238.85	-1.32659
490	xbz_26373	1616.91	12754.8	2.87099
491	xbz_2650	16049.9	4394.89	-1.90888
492	xbz_26952	414.733	2657.82	2.57856
493	xbz_27054	1051.89	169.378	-2.63466
494	xbz_27255	1199.16	7513.1	2.52855
495	xbz_27256	188.536	591.738	1.65012
496	xbz_27257	1481.16	9181.74	2.63204
497	xbz_27387	2843.78	7130.46	1.26704
498	xbz_27398	5850.76	35426.3	2.57291
499	xbz_27400	259.714	79.5299	-1.99883
500	xbz_27642	4220.25	10607.5	1.30508
501	xbz_27866	6141.3	2219.7	-1.46818
502	xbz_28240	4398.32	20294	2.09348
503	xbz_28242	1596.4	10260.2	2.60919
504	xbz_28291	592.422	1755.59	1.48329
505	xbz_28632	18398.6	4895.81	-1.9292
506	xbz_29172	8503.16	34672.1	2.0277
507	xbz_29174	9271.21	36981	1.99595
508	xbz_29215	8290.87	20718.8	1.25029
509	xbz_29314	2070.04	5502.93	1.3335
510	xbz_29532	1544.5	5700.4	1.8673
511	xbz_29533	159.246	507.626	1.54142
512	xbz_2993	52.6619	432.204	3.07488
513	xbz_3026	6842.97	21667.9	1.60363
514	xbz_3169	251.627	1478.01	2.63204
515	xbz_3182	24958.7	9902.45	-1.28658
516	xbz_3731	3937.28	19563.7	2.3116
517	xbz_3732	2.23063	98.4656	5.51166
518	xbz_3733	117.676	699.323	2.37722
519	xbz_3737	3527.67	17004.7	2.17549
520	xbz_3740	110.62	20.7836	-2.40481
521	xbz_3741	6240.05	15560.2	1.28589
522	xbz_4272	29.3652	200.894	2.77425
523	xbz_4623	10084.5	4665.72	-1.15868
524	xbz_4638	330.851	707.497	1.23296
525	xbz_4920	12281	3701.82	-1.85811
526	xbz_4929	2301.64	829.588	-1.46614
527	xbz_5066	210.068	755.449	1.78146
528	xbz_5186	10886.8	6917.62	-0.718975
529	xbz_5246	15385.2	5359.52	-1.58337
530	xbz_5349	416.304	1023.68	1.25256
531	xbz_5579	30712.3	71964.9	1.08834
532	xbz_5580	36.9583	157.14	2.08808
533	xbz_6201	1330.51	5024.86	1.88404
534	xbz_6473	1757.11	5183.8	1.49953
535	xbz_6475	5236.92	11572.4	1.09517
536	xbz_702	4062.23	10626.3	1.28871
537	xbz_7110	301.528	698.981	1.26643
538	xbz_7200	5927.19	1686.95	-1.87919
539	xbz_7517	3021.24	7424.03	1.29706
540	xbz_7667	3223.95	17821.1	2.46669
541	xbz_8049	424.885	1258.85	1.66336
542	xbz_8050	11018.8	28809.2	1.28948
543	xbz_8189	581.057	1904.48	1.69677
544	xbz_8207	206.029	828.16	1.92671
545	xbz_8328	425.002	806.538	0.915055
546	xbz_8337	11740.5	29349	1.32182
547	xbz_8338	10592.2	25883.9	1.23671
548	xbz_8644	6241.61	573.226	-3.47705
549	xbz_9265	4751.88	1640.73	-1.59669
550	xbz_9343	841.451	1748.04	1.02236
551	xbz_9344	158.341	369.67	1.22321
552	xbz_9572	814.761	509.054	-0.662465
553	xbz_998	22473.8	8769.68	-1.40963
554	he_25690	19047.2	13079.7	-0.495885
555	he_25728	1444.57	135.755	-3.39914
556	he_25733	1130.41	59.3692	-4.33582
557	he_25747	26249.3	22014.1	-0.210776
558	he_25748	4002.45	2461.58	-0.678437
559	he_37964	15.48	123.85	2.75565

## Sheet: 检测信号值
No.	探针_ID	Sample A 平均信号值	Sample B 平均信号值
1	chr10_C_2
2	chr10_D_4
3	chr11_A_6
4	chr11_A_7
5	chr12_D_5
6	chr13_D_6
7	chr18_B_3
8	chr2_B_2
9	chr2_D_1
10	chr20_B_4
11	chr6_A_4
12	chr8_B_5
13	chr9_B_6
14	he_10021		20.6929
15	he_10106		16.2647
16	he_1011	759.575	105.723
17	he_1012	955.911	638.244
18	he_10229	466.566	215.93
19	he_10363	34985.1	72917.1
20	he_10364	51.8921	131.417
21	he_10527	7667.97	4657.64
22	he_10552		314.703
23	he_10636	174.36	354.398
24	he_11072
25	he_11181	1995.03	189.15
26	he_11413		555.702
27	he_11415		373.441
28	he_11517		19.9425
29	he_11553	751.551	5583.79
30	he_11555	1582.45	6190.51
31	he_11662
32	he_11733	41.6681	73.0219
33	he_11751	50.4032	28.1456
34	he_11793	5904.92	4709.52
35	he_12051	50.1765	124.56
36	he_12052	28.0249
37	he_12202	1868.88	5736.61
38	he_12203	66.5449	184.816
39	he_12204	7788.93	15499.2
40	he_12335
41	he_12443
42	he_12546
43	he_12588		71.3983
44	he_12763
45	he_1289
46	he_129		305.907
47	he_13009
48	he_13117	27.0294	25.5846
49	he_13183
50	he_13388	346.569	818.907
51	he_13555	6070.64	1695.7
52	he_13758	11866.2	5467.73
53	he_138
54	he_13856	12913.1	847.276
55	he_13939	186.034	172.596
56	he_13993
57	he_14017	28439.5	12091.4
58	he_14115	3058.33	7916.33
59	he_14144
60	he_14371
61	he_14382	101.879	42.9031
62	he_14386	151.497	6625.95
63	he_14393		1072.95
64	he_14400
65	he_14422	44.8864	224.841
66	he_14423	3546.56	20615.9
67	he_14700
68	he_1492	260.521	87.4932
69	he_1493	2434.66	6047.57
70	he_15138
71	he_15140	261.115	890.516
72	he_15142	10299.2	27004.3
73	he_15155
74	he_15187
75	he_15199
76	he_15200
77	he_15201
78	he_15370	622.892	1983.59
79	he_15397	66.7526	126.021
80	he_15398	209.251	815.461
81	he_15588	10149.3	203.853
82	he_15616
83	he_15624	288.846	527.075
84	he_15651	12073	31290.9
85	he_15653	9306.54	24225.6
86	he_15724	29424	27791.1
87	he_1586	8839.01	4512.82
88	he_15944
89	he_15980
90	he_16205	40.1377	40.8981
91	he_16206	35.4617	47.2652
92	he_16289
93	he_16347		128.305
94	he_16349	39.5567	2833.3
95	he_1662
96	he_16687
97	he_16726	6560.02	2846.27
98	he_16732
99	he_16755
100	he_16903
101	he_17153	5086.01	34111.5
102	he_17154	39.6025	40.7571
103	he_17193
104	he_17291	4249.44	1415.72
105	he_17301		20.4755
106	he_17407	47.1869	748.415
107	he_17423
108	he_17441	111.015	10233.1
109	he_17443
110	he_17477	779.004	1779.07
111	he_17478	167.015	364.877
112	he_17857	996.103	625.048
113	he_17916
114	he_18076	37.0194	41.0899
115	he_18129	506.943	95.2673
116	he_18225	21871.5	9240.41
117	he_18278	26495.8	11747.8
118	he_18321
119	he_18422
120	he_18466
121	he_18518
122	he_18545
123	he_18658
124	he_18859
125	he_18955	571.971	234.585
126	he_19075
127	he_1916
128	he_19342
129	he_19454	8408.85	1860.82
130	he_19455	1165.38	1232.65
131	he_197	55.0784	28.8844
132	he_19742	22669.8	9777.24
133	he_19849	48.6463	43.7681
134	he_19909
135	he_1991	19632.1	8460.16
136	he_19925
137	he_19980
138	he_20008	5728.48	2488.85
139	he_20127
140	he_20131		95.654
141	he_20151	16968.7	6481.6
142	he_20180	1652.47	750.096
143	he_20181	1335.79	91.5441
144	he_20265		73.3778
145	he_20271	1273.04	307.652
146	he_2031	13049.2	810.713
147	he_20337
148	he_20374	10321.3	30316.3
149	he_20375
150	he_20416	46.6761
151	he_20459		21.4217
152	he_2066	168.126	24.8776
153	he_20697
154	he_20870	79.3601	16.9935
155	he_20896	4629.6	2793.25
156	he_20910
157	he_20915	313.488	182.7
158	he_20919	7988.6	2148.04
159	he_20922	124.669	29.0082
160	he_20936	693.417	246.633
161	he_20939	5847.97	586.546
162	he_20942
163	he_20968	8360.27	3089.53
164	he_21018	450.625	85.2791
165	he_21059	33.7856	2582.57
166	he_21097
167	he_21132	41.3973	39.8293
168	he_21320
169	he_21337
170	he_21527
171	he_21561	36462.9	19355.5
172	he_21566	10809.3	813.638
173	he_21594	71.1831	446.814
174	he_21649	36.6157	31.7248
175	he_2174	1567.08	203.951
176	he_2186	1099.42	931.781
177	he_21871		1742.06
178	he_21872	45.4094	1476.57
179	he_21873	130.566	6541.88
180	he_21878	1180.07	361.984
181	he_21880	237.847	184.013
182	he_21967	5587.27	1930.96
183	he_21987
184	he_22155		97.1655
185	he_22366
186	he_22404		205.369
187	he_22493
188	he_22545		73.7245
189	he_22725	2384.36	1360.93
190	he_22736
191	he_22761		51.6071
192	he_22762
193	he_22798
194	he_22897
195	he_23031
196	he_23198
197	he_23268		32.7899
198	he_23269
199	he_23346	176.206	133.538
200	he_23347	1009.85	434.628
201	he_23413	12990.7	2807.6
202	he_23414
203	he_23428	6120.91	2747.75
204	he_23458	968.444	484.314
205	he_2348	5867.92	604.338
206	he_23737	221.211	72.5956
207	he_23832
208	he_2388	2120.64	405.362
209	he_23954
210	he_23994
211	he_24	9417.75	19835.2
212	he_24113
213	he_24277		160.821
214	he_24403	740.494	377.455
215	he_24664
216	he_24677	184.258	1484.68
217	he_24706
218	he_24730	42.2753	29.3461
219	he_24741
220	he_24757
221	he_24920
222	he_24979	1087.52	1728.28
223	he_2498
224	he_24981	6695.65	4695.32
225	he_25	421.19	3216.34
226	he_2502
227	he_25080	13041.6	30862.1
228	he_25081	7834.48	19855.8
229	he_25082
230	he_25083	11939.5	28410
231	he_25084	513.263	503.327
232	he_25098	250.973	85.2151
233	he_25099	14648.4	52626.1
234	he_25100	593.607	159.848
235	he_25101	12467.6	42974.4
236	he_25103	11835.5	45644.8
237	he_25327		44.3394
238	he_25328	131.504	395.841
239	he_25375	5924.45	2432.94
240	he_25408	119.113	182.435
241	he_25409	3560.5	14316.1
242	he_25497
243	he_25586	39.2624	1928.74
244	he_25588		840.101
245	he_25626
246	he_25668	20105.2	8104.66
247	he_25669	1470.81	236.905
248	he_25673	1409.57	270.917
249	he_25674	4752.08	363.656
250	he_25676	1495.57	353.82
251	he_25688	296.471	84.3769
252	he_25690	19011.3	13099
253	he_25693		21.2516
254	he_25699	11271.1	6888.67
255	he_25704	876.789	87.9907
256	he_25712	9958.05	1294.93
257	he_25728	1413.48	127.703
258	he_25733	1149.04	58.1185
259	he_25747	25052.2	22108.9
260	he_25748	3949.58	2463.91
261	he_25753	631.398	1046.5
262	he_25776	10758.5	3530.5
263	he_25777	190.665	29.1404
264	he_25788
265	he_25933
266	he_26079	36.3048	106.344
267	he_26080
268	he_26104	1885.73	799.476
269	he_26137	10962.2	890.984
270	he_26153
271	he_26246	21077	4843.65
272	he_26249
273	he_26307	19144.7	25416.2
274	he_26314	125.421	242.128
275	he_26344
276	he_26418
277	he_26540	23854.3	6646.59
278	he_26559	604.803	84.4259
279	he_26584
280	he_26695	34.8709
281	he_26755	824.936	5530.34
282	he_26836	29.404	20.739
283	he_27079		606.905
284	he_27160
285	he_27208		23.0688
286	he_27218	5933.36	433.705
287	he_27228	36.1519	110.358
288	he_27299
289	he_27500
290	he_27523	72.2441	446.749
291	he_27671	2782.79	2224.28
292	he_27706	8176.36	3322.95
293	he_27778
294	he_27781
295	he_27797
296	he_27831
297	he_27875	762.703	619.358
298	he_27876	2532.68	951.399
299	he_28251
300	he_28329	99.9159	79.5045
301	he_28378	16575.6	6271.52
302	he_28411
303	he_28451	10728.5	1071.09
304	he_28473	88.0323	20698.5
305	he_28474	545.105	38438.8
306	he_28476	167.003	10834.3
307	he_28479		47.4547
308	he_28480	451.829	16450.1
309	he_28482	527.628	29190.1
310	he_28483	37.8654	1968.71
311	he_28710
312	he_28711	2979.5	11946.6
313	he_28712	53.7819	82.686
314	he_28713	1745.69	9996.61
315	he_28825	2225.14	17454.2
316	he_28827	486.738	15873.5
317	he_28866	15803.8	4955.4
318	he_28947		20.8318
319	he_28948	47.0566	41.3829
320	he_28961	2526.08	715.508
321	he_28969	8471.58	152.72
322	he_29126	7605.48	2419.69
323	he_2914	4900.1	1316.12
324	he_29243
325	he_29253
326	he_29304	4529.59	709.762
327	he_2937	48.973	2324.3
328	he_29411	15003.3	5236.63
329	he_29521	28039.9	63269.7
330	he_29580	33.8906	29.2721
331	he_29648	7973.22	898.34
332	he_29697
333	he_2975	23020.6	13786.4
334	he_29755
335	he_29964	12007.5	850.96
336	he_29970	4339.53	24006.5
337	he_29981
338	he_30037
339	he_30086	31.5977	24.4153
340	he_30153	401.982	283.07
341	he_30154
342	he_30220	90.933	108.891
343	he_30315
344	he_30317	7400.68	3221.92
345	he_30405	238.721	1130.33
346	he_30566	8340.33	973.34
347	he_30693
348	he_30695	23192.6	14896.3
349	he_30831	9203.19	3368.33
350	he_30882
351	he_30884	5749.42	1487.49
352	he_30889	6304.8	5087.16
353	he_30905	4029.76	2403.08
354	he_31014	1181.57	2826.44
355	he_31018	71.6018	605.681
356	he_31019		236.548
357	he_31029	37.9325	2164.81
358	he_31030	150.767	15708.2
359	he_31031	30.4454	3131.09
360	he_31032	171.978	14705
361	he_31033		520.552
362	he_31035	19903.1	8158.18
363	he_31077	49.1663	185.726
364	he_31201
365	he_31220
366	he_31221	46.0817	41.497
367	he_31262
368	he_31383	37.8466	557.153
369	he_31400
370	he_3159
371	he_3161
372	he_31641	10831.5	26018.3
373	he_31698	719.201	81.678
374	he_31902		25.8493
375	he_31915
376	he_31933
377	he_32	1346.96	75.1516
378	he_32093
379	he_32353	97.5967	3904.59
380	he_32394	10997.9	29256.9
381	he_32438		16.3359
382	he_32556	31.5973
383	he_32697
384	he_32726	5833.52	2426.78
385	he_32856
386	he_33102
387	he_33125	65.7478
388	he_33216	7797.52	4468.26
389	he_33220	3169.06	1444.42
390	he_33255		24.4966
391	he_3332	5548.86	14612.1
392	he_33419
393	he_33463		44.3614
394	he_33536
395	he_33591		27.4645
396	he_33592	5426.57	34712.9
397	he_33594	933.837	8323.81
398	he_33647	12203.3	992.837
399	he_33649	6128.1	307.843
400	he_33719
401	he_34022
402	he_3417
403	he_34254	2530.48	1475.11
404	he_34409
405	he_34434
406	he_3446
407	he_34693
408	he_34734
409	he_35105	27.615	36.9482
410	he_35149
411	he_35178	8097.79	280.909
412	he_35232	1033.74	607.466
413	he_35260
414	he_35265	28.2192	24.5423
415	he_35269		764.429
416	he_35306	39.4949	83.863
417	he_35417
418	he_35559	1942.11	383.573
419	he_35606	20468.1	4330.09
420	he_35611	1740.53	184.376
421	he_35693	1153.59	993.582
422	he_35750	9053.98	3435.6
423	he_360		98.7368
424	he_36376	981.891	15058.1
425	he_36377	216.681	714.288
426	he_36383	409.482	564.552
427	he_36384		23.0541
428	he_365	126.468	3080.24
429	he_36506	167.417	492.103
430	he_36507		68.0507
431	he_36542	82.7214	39.6872
432	he_36543	186.776	65.3341
433	he_36553	48.4065	245.997
434	he_36556	458.409	158.132
435	he_36560
436	he_36597	1380.53	90.9473
437	he_36616	15402.8	7067.4
438	he_36635
439	he_36649		58.3285
440	he_36661	58.6808	100.815
441	he_36697	55.7562
442	he_36724
443	he_36788	1283.99	899.083
444	he_36832	10495.4	6418.43
445	he_36840		35.6608
446	he_36910	20358.9	7495.6
447	he_36935
448	he_3702	197.838	70.8605
449	he_37052	127.827	269.626
450	he_37061		18.094
451	he_37062		42.6726
452	he_3720		62.252
453	he_37317	13312.6	6307.5
454	he_37337	1830.38	1667.65
455	he_37488		25.0741
456	he_37705
457	he_37784
458	he_37851	10569.9	682.13
459	he_37854	7903.73	6750.25
460	he_37871	36.817	42.7069
461	he_37889	131.425	5651.44
462	he_37892	62.6369	3715.42
463	he_37964		120.179
464	he_38045
465	he_38204	62.0058	3076.64
466	he_38247	6658.89	1468.18
467	he_383		37.5385
468	he_38328	53.2399	45.1705
469	he_38407	11963.8	47435.1
470	he_38408	258.463	57.3807
471	he_38409	15173.1	53594.9
472	he_38410	355.464	189.399
473	he_38547
474	he_38575	25924.7	10724.7
475	he_38577	10322.3	6043.23
476	he_38583	9540.51	2381.53
477	he_38587	11352.4	3096.09
478	he_38706
479	he_38779	841.728	275.649
480	he_38783	60.3379	131.96
481	he_38877
482	he_38881	89.3594
483	he_38904	12399.6	10699.7
484	he_39032	53.7171	23.1185
485	he_39049		24.8878
486	he_39085	32.5016	27.7295
487	he_3909
488	he_39224	74.2321	166.418
489	he_39302	16510.8	4649.4
490	he_39410
491	he_39456	705.799	422.931
492	he_39482
493	he_39499		61.6958
494	he_39736	5550.71	319.525
495	he_39883	18831.2	6407.24
496	he_4000		20.9889
497	he_40110	6768.85	2724.34
498	he_40138	30955.5	32783.5
499	he_40142	9708.94	4272.94
500	he_40162	3786.92	1957.61
501	he_40174	1866.4	1192.95
502	he_40343	30381.4	18639.7
503	he_4037	7033.02	6096.97
504	he_40557
505	he_4064	55.3077	21.581
506	he_40709	3145.35	558.1
507	he_40719	29236.6	17681.3
508	he_40784
509	he_40953	6565.09	3543.21
510	he_40976	34.0181	207.644
511	he_41025
512	he_41210	1995.58	94.356
513	he_41230
514	he_41259	12683.7	796.148
515	he_41264	36.0003	966.599
516	he_41333	4892.36	310.189
517	he_41343	51.4186	35.3023
518	he_41344	30.0101	50.2645
519	he_41514	110.349
520	he_41519	115.226	21.6455
521	he_41735	2712.37	8038.42
522	he_4179
523	he_41842
524	he_41925
525	he_41985	29.693	16.2513
526	he_4201	366.615	2683.5
527	he_42040	39.6157	57.7728
528	he_42138
529	he_42176		88.6486
530	he_42208
531	he_42309		83.4943
532	he_42311	37.6846	417.852
533	he_42318	40.6103	985.065
534	he_42327
535	he_4234	3563.02	947.063
536	he_42549	6425.52	543.129
537	he_42703
538	he_42966	4320.78	14238.8
539	he_43060	6435.35	18153.7
540	he_43348	4173.65	1815.96
541	he_43505
542	he_43686	10458.6	3712.51
543	he_43839
544	he_43853	7089.48	4780.04
545	he_43858
546	he_43902
547	he_44031	30.3644
548	he_44348
549	he_44379	2250.71	94.0004
550	he_444	13592.9	6967.83
551	he_44491
552	he_44575	54.162	34.6638
553	he_44769
554	he_44774
555	he_44807	1904.48	541.358
556	he_4491	163.418	56.1788
557	he_44968		67.218
558	he_45012	23437.4	8028.19
559	he_45339
560	he_45492
561	he_45540
562	he_45766	12828	4897.97
563	he_4580
564	he_45964
565	he_46026
566	he_46034	10386.6	398.712
567	he_46082
568	he_4609	2033.94	371.954
569	he_46242	30180.9	5124.49
570	he_46244
571	he_4625		208.637
572	he_46260
573	he_46408	18119.4	11135
574	he_46690
575	he_46744	76.3836	4747.53
576	he_46823	20690.7	9630.34
577	he_46887	562.28	1210.78
578	he_47036	3162.67	19506.1
579	he_47085	15267.3	7709.5
580	he_47198	48.1617	108.378
581	he_47213	12485.5	4841.23
582	he_4723	8254.55	5376.87
583	he_47473
584	he_47479	1341.6	355.205
585	he_47496	6726.8	1064.8
586	he_47498	4610	2087.98
587	he_47500
588	he_47505	5661.55	3341.75
589	he_47509
590	he_47514	4994.89	1316.53
591	he_47515	1455.25	57.0335
592	he_47519	3138.92	2476.8
593	he_47535	32.9368
594	he_47544	9461.7	3441.57
595	he_47546	8378.44	2724.73
596	he_47550	7868.12	3418.72
597	he_47551	873.857	267.462
598	he_47552	8385.41	3675.35
599	he_47554	7275.74	3052.32
600	he_47558	10020.5	3658.88
601	he_47874	13880.6	4840.31
602	he_48015	1724.29	368.964
603	he_48071	47.298	45.9051
604	he_48075	259.5	340.636
605	he_48076	1832.55	12953
606	he_48081	45.9543
607	he_48162
608	he_4830		37.5647
609	he_48324
610	he_48741
611	he_48746
612	he_48827
613	he_48829	35.5359	91.8145
614	he_48830	35.7641	363.265
615	he_48880		45.4
616	he_48881	31.4828	99.2447
617	he_4902	289.203	36.5815
618	he_49215
619	he_4926	34.1929	223.613
620	he_4927	31.9888	53.2052
621	he_4928		74.884
622	he_49310
623	he_49313
624	he_49538	5798.94	2391.93
625	he_49591	33.48
626	he_49593	39.3992	173.777
627	he_49594	1415.14	7105.63
628	he_49595	190.687	561.793
629	he_49596	1508.12	9299.71
630	he_4967	10015.5	496.068
631	he_49808	4864.77	10924.8
632	he_49811	52.7155	773.61
633	he_49813	3072.25	6704.55
634	he_49836	6686.21	36453.6
635	he_49837		19.8596
636	he_49840	472.182	117.429
637	he_5002
638	he_50065	4081.02	849.129
639	he_50188
640	he_50197
641	he_50222		47.3627
642	he_50323	3421.22	9265.22
643	he_50521	10864.5	663.353
644	he_50564
645	he_5069	137.937	1833.59
646	he_50707	8845.97	4450.45
647	he_50723	6005.81	64.6203
648	he_50815	11347.8	754.649
649	he_51088
650	he_51253
651	he_5126	23358.7	10010.8
652	he_51341	35.6642	28.9429
653	he_51342	5795.13	20510.8
654	he_51344	1622	10141.9
655	he_51356	1183.66	887.368
656	he_5138	1304.01	244.064
657	he_51417	530.5	1500.03
658	he_51418	2522.37	5012.78
659	he_51658
660	he_51754
661	he_51788		1367.98
662	he_51829	41.673	30.5248
663	he_51830		286.919
664	he_51888	10342.3	670.949
665	he_51914		36.4107
666	he_51961	10736.7	11524.8
667	he_51982	78.3627	106.686
668	he_51983	177.043	204.514
669	he_52010	160.732	348.094
670	he_52022	777.645	396.528
671	he_52065		57.99
672	he_52106	3016.74	1522.13
673	he_5221		21.8818
674	he_52217
675	he_52218
676	he_52245	11355.6	846.019
677	he_5226	13409.1	35784.4
678	he_52487	68.2851	15.418
679	he_52673		35.9205
680	he_52701	1743.35	973.049
681	he_52722	43.4223
682	he_52733	139.452	73.6607
683	he_52751	41.2904	25.2025
684	he_52821	44.2676	21.824
685	he_52822
686	he_52827	33.0781
687	he_52854	9251.84	3804.81
688	he_52875	163.462	671.993
689	he_52908		26.1639
690	he_52910	24055.7	12612.2
691	he_52927	16470.3	6179.62
692	he_52967
693	he_53032	9942.44	37465.5
694	he_53033	237.773	417.318
695	he_53034	8070.61	34879.9
696	he_53035	40.5701	87.5179
697	he_531	711.906	8200.56
698	he_53109	2001.87	4161.97
699	he_53133	9532.03	21478.4
700	he_53164
701	he_53189	25736.2	21934.7
702	he_532	172.936	174.931
703	he_53228	77.8789	35.8059
704	he_53229
705	he_53230	246.969	334.114
706	he_53232
707	he_53233	36.508	85.221
708	he_53286	260.579	560.918
709	he_53287	2628.45	6594.42
710	he_53370
711	he_53444
712	he_5346	16118.9	9138.84
713	he_53507
714	he_53509		17.7414
715	he_53513	67.7028	124.306
716	he_53515	47.3214	69.281
717	he_53516		49.6473
718	he_53548	82.8813	347.651
719	he_53549	32.5482	43.4755
720	he_53589	1714.69	5874.3
721	he_53591	236.788	626.077
722	he_540
723	he_5403	27.4126	21.4298
724	he_5625		35.9188
725	he_5626	47.7596	437.698
726	he_5651	5480.07	1465.73
727	he_5721
728	he_5727	8525.62	25119.1
729	he_5849
730	he_593	101.819	4735.65
731	he_596	33.6695	832.35
732	he_597
733	he_598	51.27	1504
734	he_6004
735	he_6014
736	he_6015	202.741	1344.86
737	he_6041	29814	16606.2
738	he_6383
739	he_6498
740	he_6625	29.2991
741	he_6656
742	he_6808
743	he_6831	3526.7	19995.9
744	he_6832		86.0896
745	he_6833	136.527	638.278
746	he_6834	43.3608	69.1274
747	he_6835	255.281	7088.83
748	he_6836	3104.75	16032.1
749	he_6837
750	he_6841	55.6831
751	he_6842	5298.73	14508.9
752	he_7005
753	he_7041	32008.6	24639.4
754	he_7043	4647.21	2202.14
755	he_7044
756	he_7061
757	he_7169
758	he_7253	2760.36	1626.33
759	he_7363	27864.3	2204.53
760	he_753
761	he_7624
762	he_7788
763	he_7822	47.7437	215.033
764	he_810		1151.9
765	he_8109	47.5464	33.458
766	he_8209	686.527	63.2211
767	he_8384
768	he_8487
769	he_8520	11349.4	5000.27
770	he_8535	241.729	613.008
771	he_8569	126.514	135.718
772	he_8749
773	he_8774	465.172	184.84
774	he_8776	36266.7	26315.8
775	he_8778	38796.7	29765.6
776	he_8779	10667	9460.15
777	he_8797		15.6121
778	he_8861	46.9093	44.3141
779	he_8862	318.354	669.745
780	he_9036
781	he_9047	4297.66	1414.55
782	he_9049	18223	6777.44
783	he_9053	1900.46	496.161
784	he_9058	2256.07	884.635
785	he_9059	2347.63	454.044
786	he_9068	15798.8	20089
787	he_9090	709.898	282.587
788	he_9307	299.943	960.558
789	he_9463	235.964	8339.5
790	he_9626		66.2031
791	he_9627		34.9159
792	he_9634	15815.3	8243.74
793	he_9637	164.983	36.5141
794	he_9638	182.573	34.2347
795	he_9646	15884.1	5061.35
796	he_9720	43.5593	2668.23
797	he_9721	149.823	7565.91
798	he_9772	5634.02	4535.78
799	he_9775	885.053	262.882
800	he_9776	5018.25	523.188
801	he_981	88.5879	5250.05
802	he_983
803	he_9859	1387.73	1494.27
804	he_9860	514.34	1194.3
805	he_9882	13383.5	903.282
806	he_9903	206.07	248.23
807	he_9904	41.6148	101.469
808	rt_chr1_A_1
809	rt_chr1_A_1_host
810	rt_chr1_C_1	71.5828	25.8641
811	rt_chr1_C_1_host
812	rt_chr1_G_1
813	rt_chr13_E_2
814	rt_chr13_E_2_host
815	rt_chr16_B_7
816	rt_chr2_B_1
817	rt_chr2_D_2
818	rt_chr2_D_3
819	rt_chr3_A_2
820	rt_chr3_E_1
821	rt_chr4_A_3
822	rt_chr6_A_5
823	rt_chr9_F_1
824	TU1
825	TU100,TU232	150.806	38.7902
826	TU105
827	TU107
828	TU108
829	TU119
830	TU12
831	TU126_1	133.164
832	TU139
833	TU145
834	TU16
835	TU160
836	TU161
837	TU184
838	TU194
839	TU195
840	TU20
841	TU206	619.034	148.505
842	TU208
843	TU219
844	TU22
845	TU230
846	TU231
847	TU235
848	TU239
849	TU24
850	TU241
851	TU242
852	TU244
853	TU254
854	TU258		33.8492
855	TU260
856	TU261
857	TU263
858	TU283
859	TU285	4720.1	475.061
860	TU303
861	TU308
862	TU311
863	TU313
864	TU315	475.101	80.8573
865	TU319
866	TU327	378.027	84.5849
867	TU357
868	TU368		19.9328
869	TU371	87.3888	18.4635
870	TU384
871	TU386
872	TU387
873	TU398
874	TU399
875	TU4
876	TU416	37.0472
877	TU421
878	TU43
879	TU431
880	TU433	38.1815	28.3665
881	TU442	32.2295	21.9564
882	TU448	40.7041	26.9557
883	TU452	237.995	55.3797
884	TU465
885	TU471
886	TU481
887	TU498
888	TU499	28.8198	70.4088
889	TU500
890	TU513
891	TU531
892	TU540
893	TU541
894	TU556
895	TU558
896	TU56	17025.3	510.478
897	TU583
898	TU589	31.3125
899	TU600	866.877	46.6485
900	TU605
901	TU625
902	TU655
903	TU66
904	TU668
905	TU675
906	TU680
907	TU681
908	TU691
909	TU692
910	TU693
911	TU694
912	TU71
913	TU757	480.174	42.4409
914	TU777
915	TU778
916	TU779
917	TU780
918	TU782
919	TU788
920	TU79	1390.66	310.833
921	TU791
922	TU801
923	TU809
924	TU819
925	TU821
926	TU828
927	TU830
928	TU831
929	xbz_1041	133.536	28.5598
930	xbz_10531	33.2962	24.1988
931	xbz_10532	2129.44	1208.64
932	xbz_10770
933	xbz_10778
934	xbz_10910	55.6476
935	xbz_10955	35.9322	34.2927
936	xbz_10964	1176.81	263.12
937	xbz_11018	3717.31	986.732
938	xbz_11034	11721.6	30241.1
939	xbz_11312
940	xbz_11316	9156.48	2256.41
941	xbz_11338
942	xbz_11341
943	xbz_11369	246.816	148.57
944	xbz_11501
945	xbz_11688	2511.83	1293.42
946	xbz_11720	65.8607	43.961
947	xbz_11894	3487.53	584.865
948	xbz_12	7563.66	14055.3
949	xbz_12156
950	xbz_1241	546.966	228.905
951	xbz_12421
952	xbz_12440
953	xbz_12465
954	xbz_12548	2316.69	108.216
955	xbz_12703
956	xbz_12704
957	xbz_12775	24324.1	14948.3
958	xbz_12781	6885.65	2697.3
959	xbz_12807
960	xbz_12959	63.5929	27.315
961	xbz_13260
962	xbz_13594
963	xbz_13679	175.947	76.2451
964	xbz_13680	4743.85	2809.28
965	xbz_13753	12987.5	30373.5
966	xbz_13754	8533.62	20117
967	xbz_13756	10535.6	23295.1
968	xbz_13757	384.596	370.1
969	xbz_13760	228.742	76.0792
970	xbz_13761	16772.8	53448.1
971	xbz_13762	616.8	165.634
972	xbz_13763	12574	42826.6
973	xbz_13765	12187	43682.8
974	xbz_13870		42.3567
975	xbz_13871	88.8701	273.126
976	xbz_1388
977	xbz_13910	148.59	190.861
978	xbz_13911	3650.62	14575.7
979	xbz_14020		18.0652
980	xbz_14021	135.14	170.084
981	xbz_14049	23722.3	13388.7
982	xbz_14050	626.45	139.48
983	xbz_14070	882.795	138.933
984	xbz_14076	16794.5	7895.51
985	xbz_14109
986	xbz_14113	819.434	35.8207
987	xbz_14128	9916.34	3028.68
988	xbz_14129	20742.8	17870.3
989	xbz_14130	4221.25	1835.51
990	xbz_14154	40.0715
991	xbz_14172
992	xbz_14453
993	xbz_14505
994	xbz_14512	67.2966	208.219
995	xbz_14635
996	xbz_14675	20791.7	6029.62
997	xbz_14983	18672.3	6858.37
998	xbz_15144	35.486	403.199
999	xbz_15227	7266.43	2171.51
1000	xbz_15625	11958.5	1226.48
1001	xbz_15773
1002	xbz_15774	42.2692	100.565
1003	xbz_15821	1866.45	15688.3
1004	xbz_15823	433.106	15076.9
1005	xbz_15847	18506.4	5551.16
1006	xbz_16208
1007	xbz_16233	32430.9	64173.6
1008	xbz_16439
1009	xbz_16514	3990.04	22883.9
1010	xbz_16561
1011	xbz_16594
1012	xbz_16624	464.725	295.374
1013	xbz_16788	167.8	1143.16
1014	xbz_16911
1015	xbz_17038	11412.9	3821.56
1016	xbz_17152	42.0567	184.694
1017	xbz_1728	5103.36	11585.8
1018	xbz_17281
1019	xbz_17454	10871.7	28308.4
1020	xbz_1805
1021	xbz_18521	914.275	7935.72
1022	xbz_1853
1023	xbz_18744
1024	xbz_19	1784.21	726.247
1025	xbz_19125
1026	xbz_19497		34.9397
1027	xbz_19551
1028	xbz_19721	1045.11	877.967
1029	xbz_19786
1030	xbz_20066	1034.99	15161.4
1031	xbz_20067	174.665	522.98
1032	xbz_20069	400.314	604.816
1033	xbz_20070		36.4078
1034	xbz_20113		89.8325
1035	xbz_20200		20.6658
1036	xbz_20219	54.331
1037	xbz_20363	71.0012	227.071
1038	xbz_20369		17.6015
1039	xbz_20370		47.8266
1040	xbz_20511	5626.56	1475.57
1041	xbz_21085	12504.4	45360.1
1042	xbz_21086	205.324	59.8366
1043	xbz_21087	16952.4	56197.4
1044	xbz_21088	263.428	155.917
1045	xbz_21134
1046	xbz_21235
1047	xbz_21267	54.3662	117.039
1048	xbz_21465	76.2274	170.924
1049	xbz_2177	351.284	2395.71
1050	xbz_21862	17679.9	5942.71
1051	xbz_22723		21.3203
1052	xbz_22825	3309.94	9256.92
1053	xbz_2283	119.468	30.857
1054	xbz_23022	67.1604	54.9115
1055	xbz_23097		94.5257
1056	xbz_23158
1057	xbz_2329
1058	xbz_23504	3885.85	12567.6
1059	xbz_23536	6985.09	17905.4
1060	xbz_23885
1061	xbz_23915	10528.5	3635.79
1062	xbz_23920		28.523
1063	xbz_24015
1064	xbz_24446	63.5411	27.0236
1065	xbz_24742
1066	xbz_250	827.513	8529.39
1067	xbz_251	94.0828	136.917
1068	xbz_2530		62.1175
1069	xbz_25639	5064.84	1136.62
1070	xbz_25711	652.353	1408.02
1071	xbz_258		45.7299
1072	xbz_25884	54.4891	103.025
1073	xbz_25897	13402.1	4987.29
1074	xbz_26076	7252.63	1238.1
1075	xbz_26095	3571.93	158.169
1076	xbz_26118	10590.3	3621.43
1077	xbz_26123	9571.58	3969.2
1078	xbz_26125	9361.24	3796.4
1079	xbz_26127	8104.8	3174.6
1080	xbz_26134	37.0424
1081	xbz_26370	57.4815	56.7117
1082	xbz_26372	195.128	305.713
1083	xbz_26373	1767.17	12484.5
1084	xbz_2650	16684.7	4409.55
1085	xbz_26760
1086	xbz_26816		80.9278
1087	xbz_26844	62.9832	126.636
1088	xbz_26952	446.118	2715.92
1089	xbz_27054	1078.14	173.867
1090	xbz_27158
1091	xbz_2724
1092	xbz_27253	117.744	44.827
1093	xbz_27255	1303.25	7220.44
1094	xbz_27256	203.478	591.462
1095	xbz_27257	1531.57	9072.09
1096	xbz_27387	3053.88	7148.88
1097	xbz_27388		80.4494
1098	xbz_27389	50.5899	112.744
1099	xbz_27398	6193.85	35544.6
1100	xbz_27399
1101	xbz_27400	287.411	74.5826
1102	xbz_27606	46.0662	66.9769
1103	xbz_27642	4219.49	10436.5
1104	xbz_27866	6161.01	2206.18
1105	xbz_28039
1106	xbz_28160		22.7304
1107	xbz_28239
1108	xbz_28240	4813.97	19533.4
1109	xbz_28242	1686.65	10260.4
1110	xbz_28291	639.474	1727.4
1111	xbz_28567		24.5084
1112	xbz_28632	18455.5	4857.15
1113	xbz_28720
1114	xbz_28951	65.0357
1115	xbz_29013	11312.7	12089.2
1116	xbz_29172	9021.37	35644.2
1117	xbz_29173	59.005	171.593
1118	xbz_29174	9312.55	35997.9
1119	xbz_29215	8825.91	20656.5
1120	xbz_29276	122.034	68.9498
1121	xbz_29277
1122	xbz_29278	340.729	477.242
1123	xbz_29280
1124	xbz_29281
1125	xbz_29314	2262.76	5410.61
1126	xbz_29476	31.9572	137.827
1127	xbz_29477	46.876	60.0562
1128	xbz_29478		36.6886
1129	xbz_29532	1679.82	6079.63
1130	xbz_29533	181.322	516.752
1131	xbz_2993	50.7948	440.018
1132	xbz_3026	7302.63	21683.6
1133	xbz_3163
1134	xbz_3169	255.488	1518.25
1135	xbz_3182	25591.8	9993.69
1136	xbz_3197
1137	xbz_3606
1138	xbz_3731	3958.5	19474
1139	xbz_3732		90.5418
1140	xbz_3733	134.753	667.29
1141	xbz_3737	3685.67	16817.1
1142	xbz_3738
1143	xbz_3740	101.846
1144	xbz_3741	6450.3	15544
1145	xbz_3757
1146	xbz_4272	50.5273	204.866
1147	xbz_4623	10421.1	4554.14
1148	xbz_4627
1149	xbz_4638	327.67	721.968
1150	xbz_4815	44.2214	39.0664
1151	xbz_4920	13198.3	3688.17
1152	xbz_4929	2391.1	827.88
1153	xbz_4935	18160	20295.7
1154	xbz_5066	232.155	785.714
1155	xbz_5128
1156	xbz_5186	11577.4	6901.48
1157	xbz_5246	15827.8	5231.3
1158	xbz_5256
1159	xbz_5348	1198.2	1140.77
1160	xbz_5349	433.757	1029.04
1161	xbz_5371	161.418	211.557
1162	xbz_5579	33058.5	71059.4
1163	xbz_5580	50.9274	157.562
1164	xbz_5978
1165	xbz_6201	1407.54	5182.49
1166	xbz_630
1167	xbz_6473	1818.64	5262.65
1168	xbz_6475	5439.14	11350.3
1169	xbz_6871
1170	xbz_701	118.662	47.8574
1171	xbz_702	4189.46	10242.8
1172	xbz_7110	315.968	697.382
1173	xbz_7200	6104.72	1690.27
1174	xbz_73
1175	xbz_7466
1176	xbz_7517	3216.78	7654.69
1177	xbz_7538
1178	xbz_7657
1179	xbz_7667	3351.12	18101.2
1180	xbz_78
1181	xbz_785
1182	xbz_8049	430.742	1279.71
1183	xbz_8050	11550.6	27879.5
1184	xbz_8189	637.609	1901.68
1185	xbz_8207	218.186	824.828
1186	xbz_8230
1187	xbz_8237
1188	xbz_8315
1189	xbz_8328	427.409	788.018
1190	xbz_8337	12449.4	30579.1
1191	xbz_8338	10853	25340.7
1192	xbz_8613		23.5539
1193	xbz_8644	6572.44	569.884
1194	xbz_865
1195	xbz_8656
1196	xbz_8692
1197	xbz_8696		20.8017
1198	xbz_8958
1199	xbz_9202	40.9598	31.6793
1200	xbz_9235
1201	xbz_9265	4821.3	1590.2
1202	xbz_9334
1203	xbz_9343	844.58	1770.75
1204	xbz_9344	169.774	365.312
1205	xbz_9572	844.571	508.656
1206	xbz_9673	34.7634	22.3123
1207	xbz_9755
1208	xbz_9862
1209	xbz_998	23055.5	8522.36

## Sheet: 原始数据
					Sample A		Sample B
索引	探针_ID	目标_序列	行	列	信号强度 (平均){A}	信号强度 (标准偏差) {A}	信号强度 (平均){A}	信号强度(标准偏差) {A}	所在组	所在组型	说明
1	empty		1	1	219.88	12.3853	30.1574	3.81135	control	control_empty
2	xbz_29276	AUCAACAGACAUUAAUUGGGCG	1	2	396.926	25.3284	66.1481	11.5797	experimental
3	he_12335	UAUCUAUUACACUGAUGUUGAC	1	3	232.37	11.5197	38.8981	5.2149	experimental
4	xbz_12548	CGCCUAGUGGUUAGGAUUUGGCG	1	4	3865.1	372.368	100.444	14.4813	experimental
5	he_53032	AGCUACAUUGUCUGCUGGGUUU	1	5	15599.3	286.919	24629.8	205.195	experimental
6	he_24981	CUAAACCAUUCGUAGACGACCUG	1	6	11503.7	171.477	2893.8	141.781	experimental
7	he_38328	GCCCGGUGAUGACCAAGGCUGAGGGGA	1	7	292.741	15.4988	55.2037	8.78801	experimental
8	he_7005	GACGCUGAAGCCUCUUGCUAAUGAUGGC	1	8	239.019	12.487	40.5463	6.17106	experimental
9	he_26246	UCCUGUGGUCUAGUGGUUAGGAUUCUG	1	9	34291.1	522.079	3152.42	79.3973	experimental
10	he_45012	GCAUUGGUUGUUCAGUGGUAGAAUUC	1	10	36840.9	335.464	5130.93	165.167	experimental
11	empty		1	11	210.815	12.8078	32.0093	2.77336	control	control_empty
12	xbz_29276	AUCAACAGACAUUAAUUGGGCG	1	12	425.62	39.0041	78.9167	12.4631	experimental
13	he_12335	UAUCUAUUACACUGAUGUUGAC	1	13	219.769	9.12387	37.2685	5.36623	experimental
14	xbz_12548	CGCCUAGUGGUUAGGAUUUGGCG	1	14	3930.83	494.339	100.426	17.6996	experimental
15	he_53032	AGCUACAUUGUCUGCUGGGUUU	1	15	14763.9	233.836	27427	280.05	experimental
16	he_24981	CUAAACCAUUCGUAGACGACCUG	1	16	11270.6	130.309	3098.86	119.279	experimental
17	he_38328	GCCCGGUGAUGACCAAGGCUGAGGGGA	1	17	315.472	22.2973	74.1019	8.58377	experimental
18	he_7005	GACGCUGAAGCCUCUUGCUAAUGAUGGC	1	18	224.056	10.0176	42.3241	4.89102	experimental
19	he_26246	UCCUGUGGUCUAGUGGUUAGGAUUCUG	1	19	32092	373.555	2958.75	114.707	experimental
20	he_45012	GCAUUGGUUGUUCAGUGGUAGAAUUC	1	20	34130.9	345.839	5052.19	126.086	experimental
21	empty		1	21	193.852	12.9916	29.8056	2.40893	control	control_empty
22	xbz_29276	AUCAACAGACAUUAAUUGGGCG	1	22	395.778	32.0491	64.3519	6.19514	experimental
23	he_12335	UAUCUAUUACACUGAUGUUGAC	1	23	214.185	12.3191	35.9537	3.10677	experimental
24	xbz_12548	CGCCUAGUGGUUAGGAUUUGGCG	1	24	3921.9	384.793	91.5463	9.30017	experimental
25	he_53032	AGCUACAUUGUCUGCUGGGUUU	1	25	14264.6	252.503	24123.2	323.099	experimental
26	he_24981	CUAAACCAUUCGUAGACGACCUG	1	26	10958.3	264.671	2629.36	109.746	experimental
27	he_38328	GCCCGGUGAUGACCAAGGCUGAGGGGA	1	27	265	23.9891	53.1667	7.00934	experimental
28	he_7005	GACGCUGAAGCCUCUUGCUAAUGAUGGC	1	28	223.713	11.8093	34.9722	4.54769	experimental
29	he_26246	UCCUGUGGUCUAGUGGUUAGGAUUCUG	1	29	33246.7	415.291	3253.12	83.0597	experimental
30	he_45012	GCAUUGGUUGUUCAGUGGUAGAAUUC	1	30	36743.4	385.723	5713.19	125.52	experimental
31	empty		1	31	203.676	8.41208	29.9815	3.05091	control	control_empty
32	PUC2PM		2	1	27059.9	432.947	32272.8	440.322	control	control_spike-calibration	LC Internal Use
33	xbz_16208	AAAGCAUAGAUUCUAAGCU	2	2	225.787	10.9443	33.9074	3.56656	experimental
34	he_18658	AUGGUUCCUGUUCUUAAAGAUG	2	3	233.25	11.9376	35.1944	3.32214	experimental
35	xbz_4935	UGCCUGUCUGAGCGUCGCU	2	4	28417.3	218.03	13794.5	278.64	experimental
36	he_43839	UUAGCUAGUAGUUGUACAGUUU	2	5	237.843	11.5234	34.6944	2.34604	experimental
37	he_12546	UAGCAGAUCUGAUAUUGGUUA	2	6	231.796	12.9858	32.3056	2.97798	experimental
38	he_38575	AAUGUAGGUAAGGGAAAUCAGCAAGC	2	7	39466.1	498.104	7563.3	271.387	experimental
39	he_7041	GGCUCGUUGGUCUAGUGGUAUGAUUCUC	2	8	47434.6	446.652	18195.3	557.352	experimental
40	he_26249	CAGAGAAUGUUUAAAUUAGAUGCUUA	2	9	232.574	10.5655	35.3889	2.68896	experimental
41	he_40784	AUUAAAAUGGCUAAAAAAUUUAAUUUA	2	10	235.611	12.0496	35.537	3.55314	experimental
42	PUC2PM		2	11	26948.5	311.043	32352.2	188.881	control	control_spike-calibration	LC Internal Use
43	xbz_16208	AAAGCAUAGAUUCUAAGCU	2	12	233.25	12.5706	37.1111	3.80686	experimental
44	he_18658	AUGGUUCCUGUUCUUAAAGAUG	2	13	223.148	9.96988	34.9167	3.14487	experimental
45	xbz_4935	UGCCUGUCUGAGCGUCGCU	2	14	26796.5	362.276	14549	206.269	experimental
46	he_43839	UUAGCUAGUAGUUGUACAGUUU	2	15	218.269	10.9678	33.787	3.24412	experimental
47	he_12546	UAGCAGAUCUGAUAUUGGUUA	2	16	223.741	8.36925	40.2315	3.78785	experimental
48	he_38575	AAUGUAGGUAAGGGAAAUCAGCAAGC	2	17	39377.8	324.003	7368.36	211.578	experimental
49	he_7041	GGCUCGUUGGUCUAGUGGUAUGAUUCUC	2	18	44822.9	403.64	16995.9	399.355	experimental
50	he_26249	CAGAGAAUGUUUAAAUUAGAUGCUUA	2	19	212.324	10.5634	33.8519	2.41032	experimental
51	he_40784	AUUAAAAUGGCUAAAAAAUUUAAUUUA	2	20	210.343	12.3486	31.713	2.49505	experimental
52	PUC2PM		2	21	25456.7	353.863	32451.6	351.957	control	control_spike-calibration	LC Internal Use
53	xbz_16208	AAAGCAUAGAUUCUAAGCU	2	22	221.435	15.8688	34.3333	3.93878	experimental
54	he_18658	AUGGUUCCUGUUCUUAAAGAUG	2	23	214.25	11.9008	36.0556	3.62966	experimental
55	xbz_4935	UGCCUGUCUGAGCGUCGCU	2	24	25878.3	382.985	12945.1	201.623	experimental
56	he_43839	UUAGCUAGUAGUUGUACAGUUU	2	25	215.528	5.10352	32.8241	4.4676	experimental
57	he_12546	UAGCAGAUCUGAUAUUGGUUA	2	26	211.898	12.4232	31.8611	3.25105	experimental
58	he_38575	AAUGUAGGUAAGGGAAAUCAGCAAGC	2	27	38162.5	552.579	6654.09	158.363	experimental
59	he_7041	GGCUCGUUGGUCUAGUGGUAUGAUUCUC	2	28	45395.9	560.415	16681.5	267.744	experimental
60	he_26249	CAGAGAAUGUUUAAAUUAGAUGCUUA	2	29	229.028	8.80681	33.7963	3.60881	experimental
61	he_40784	AUUAAAAUGGCUAAAAAAUUUAAUUUA	2	30	224.269	16.1983	32.8333	3.73291	experimental
62	PUC2PM		2	31	27275.4	354.409	36996.4	560.789	control	control_spike-calibration	LC Internal Use
63	PUC2MM		3	1	23734.4	347.414	28136.8	355.317	control	control_spike-calibration	LC Internal Use
64	xbz_22825	UGAGGUAGUAGUUUGUGUCUU	3	2	5755.14	119.584	5735.75	123.047	experimental
65	he_4201	CAGUGCAAUGUUAAAAGGGCAU	3	3	858.519	58.0408	1829.02	68.4585	experimental
66	xbz_14020	CAUUAUUACUUUUGGUACGCG	3	4	245.435	13.9995	39.6204	2.21599	experimental
67	he_51914	UAGUUAUCAGACUGAUGUUUAA	3	5	250.722	14.3897	43.3611	6.33704	experimental
68	he_25101	UUCACAGUGGCUAAGUUCUGC	3	6	19217.8	335.86	30203.7	250.516	experimental
69	he_38577	AUUCAAAUGAGAACUUUGAAGGCCGAAG	3	7	17196.4	319.369	3962.11	138.515	experimental
70	he_7043	GGCCCUAUAGCUCAGGGGUUAGAGCACUG	3	8	8213.19	136.917	1414.64	89.9089	experimental
71	he_26307	GCGGGCCGCCGGUGAAAUACCACUACU	3	9	29205.1	398.381	17502.6	170.109	experimental
72	he_29304	GGUUCCAUAGUGUAGUGGUUAUCACAUCU	3	10	7911.37	215.993	443.63	36.3656	experimental
73	PUC2MM		3	11	23423.8	400.884	28433.3	259.65	control	control_spike-calibration	LC Internal Use
74	xbz_22825	UGAGGUAGUAGUUUGUGUCUU	3	12	5614.65	124.995	5759.09	103.853	experimental
75	he_4201	CAGUGCAAUGUUAAAAGGGCAU	3	13	748.648	58.8229	1649.3	79.8578	experimental
76	xbz_14020	CAUUAUUACUUUUGGUACGCG	3	14	232.343	16.0782	35.6296	2.52314	experimental
77	he_51914	UAGUUAUCAGACUGAUGUUUAA	3	15	236.296	14.7314	49.8426	4.23418	experimental
78	he_25101	UUCACAGUGGCUAAGUUCUGC	3	16	18174.4	324.472	31282.8	950.231	experimental
79	he_38577	AUUCAAAUGAGAACUUUGAAGGCCGAAG	3	17	16699.4	245.349	3833.39	83.6234	experimental
80	he_7043	GGCCCUAUAGCUCAGGGGUUAGAGCACUG	3	18	7782.72	188.773	1333.12	56.9953	experimental
81	he_26307	GCGGGCCGCCGGUGAAAUACCACUACU	3	19	27103.4	475.826	16952.6	336.412	experimental
82	he_29304	GGUUCCAUAGUGUAGUGGUUAUCACAUCU	3	20	7346.81	152.408	439.833	25.5015	experimental
83	PUC2MM		3	21	22326.5	297.259	27971.5	355.677	control	control_spike-calibration	LC Internal Use
84	xbz_22825	UGAGGUAGUAGUUUGUGUCUU	3	22	5630.61	155.702	5384.89	150.527	experimental
85	he_4201	CAGUGCAAUGUUAAAAGGGCAU	3	23	756.926	46.7652	1579.29	49.9849	experimental
86	xbz_14020	CAUUAUUACUUUUGGUACGCG	3	24	216.5	12.7832	36.7963	3.26625	experimental
87	he_51914	UAGUUAUCAGACUGAUGUUUAA	3	25	223.019	10.56	45.1389	5.50524	experimental
88	he_25101	UUCACAGUGGCUAAGUUCUGC	3	26	17513.3	311.37	27343.6	185.706	experimental
89	he_38577	AUUCAAAUGAGAACUUUGAAGGCCGAAG	3	27	16301.8	155.403	3609.91	65.2821	experimental
90	he_7043	GGCCCUAUAGCUCAGGGGUUAGAGCACUG	3	28	7944.98	187.235	1284.98	58.555	experimental
91	he_26307	GCGGGCCGCCGGUGAAAUACCACUACU	3	29	28053.4	257.937	17883.6	315.16	experimental
92	he_29304	GGUUCCAUAGUGUAGUGGUUAUCACAUCU	3	30	8012.47	174.602	481.731	31.9177	experimental
93	PUC2MM		3	31	23668.7	388.668	31798.6	606.351	control	control_spike-calibration	LC Internal Use
94	BKG0		4	1	233.602	13.9062	34.9259	3.03778	control	control_empty	LC Internal Use
95	xbz_28632	CGCGGCGGGGCGCGGGAGA	4	2	30641.5	368.582	3254.25	151.069	experimental
96	he_9720	UGCUCUGAUGAAAUCACUAAUAG	4	3	277.343	24.8612	1703.68	48.8448	experimental
97	xbz_14021	CGUACCGUGAGUAAUAAUGCG	4	4	431.407	18.5755	123.083	10.8938	experimental
98	he_51983	UGGAAGACUAGUGAUUUUGUUGUUU	4	5	487.269	33.6729	144.778	19.2132	experimental
99	he_13117	UCAUAAGAUCCAAGAAGAAGCA	4	6	251.046	11.9269	36.5	3.03715	experimental
100	he_38583	AUGAUAAACUAUGCCUGGGCAGGGCG	4	7	16459.3	192.925	1534	89.7286	experimental
101	he_7044	AACUACUUUCUUGAUUCAGGUGUUUU	4	8	257.315	10.8788	35.3519	2.85249	experimental
102	he_26540	GCCCUGUGGUCUAGUGGUUAGGAUUCUG	4	9	38410.9	487.134	4332.35	84.0153	experimental
103	he_41985	AUGAAUGAUGAACAGUAAUAAUGCUGACA	4	10	254.75	11.8544	38.6389	3.84138	experimental
104	BKG0		4	11	212.833	11.9926	31.9352	2.56239	control	control_empty	LC Internal Use
105	xbz_28632	CGCGGCGGGGCGCGGGAGA	4	12	29186.3	274.566	3137.83	139.328	experimental
106	he_9720	UGCUCUGAUGAAAUCACUAAUAG	4	13	256.824	18.5512	1743.15	125.812	experimental
107	xbz_14021	CGUACCGUGAGUAAUAAUGCG	4	14	392.843	35.9078	141.278	15.1539	experimental
108	he_51983	UGGAAGACUAGUGAUUUUGUUGUUU	4	15	500.343	35.1839	166.352	12.0158	experimental
109	he_13117	UCAUAAGAUCCAAGAAGAAGCA	4	16	247.63	17.8575	46.8241	5.64499	experimental
110	he_38583	AUGAUAAACUAUGCCUGGGCAGGGCG	4	17	16082.3	177.945	1487.15	47.2677	experimental
111	he_7044	AACUACUUUCUUGAUUCAGGUGUUUU	4	18	226.176	9.77965	36.7778	2.30129	experimental
112	he_26540	GCCCUGUGGUCUAGUGGUUAGGAUUCUG	4	19	35284.4	368.05	4255.69	197.011	experimental
113	he_41985	AUGAAUGAUGAACAGUAAUAAUGCUGACA	4	20	249.667	23.9965	36.5926	2.48749	experimental
114	BKG0		4	21	199.981	12.3606	33.5926	2.87118	control	control_empty	LC Internal Use
115	xbz_28632	CGCGGCGGGGCGCGGGAGA	4	22	28017.2	298.126	2943.86	71.065	experimental
116	he_9720	UGCUCUGAUGAAAUCACUAAUAG	4	23	260.741	25.5366	1534.78	39.9325	experimental
117	xbz_14021	CGUACCGUGAGUAAUAAUGCG	4	24	421.102	41.7379	134.111	12.2888	experimental
118	he_51983	UGGAAGACUAGUGAUUUUGUUGUUU	4	25	448.296	27.3466	154.556	17.4615	experimental
119	he_13117	UCAUAAGAUCCAAGAAGAAGCA	4	26	243.898	14.8959	35.6852	4.52128	experimental
120	he_38583	AUGAUAAACUAUGCCUGGGCAGGGCG	4	27	15687.5	241.558	1361.93	53.3198	experimental
121	he_7044	AACUACUUUCUUGAUUCAGGUGUUUU	4	28	240.194	10.2314	32.037	3.84252	experimental
122	he_26540	GCCCUGUGGUCUAGUGGUUAGGAUUCUG	4	29	36762	419.42	4485.39	111.798	experimental
123	he_41985	AUGAAUGAUGAACAGUAAUAAUGCUGACA	4	30	260.194	13.0136	38.6667	5.26849	experimental
124	BKG0		4	31	213.102	7.5479	31.9815	2.64392	control	control_empty	LC Internal Use
125	PUC2PM-20B		5	1	32402.1	424.297	26123	230.566	control	control_spike-calibration	LC Internal Use
126	xbz_26844	UGAGAACCACGUCUGCUCUGA	5	2	324.361	22.9357	98.9167	16.7126	experimental
127	he_16205	AGCUGGUGUUGUGAAUCAGGCCGU	5	3	267.38	12.5421	49.1019	5.60697	experimental
128	xbz_11688	AUCUCGGACGAGCCCCCA	5	4	4643.87	224.203	784.454	60.4171	experimental
129	he_53591	AACUGUUUGCAGAGGAAACUGAGA	5	5	632.213	35.5948	412.093	29.1883	experimental
130	he_12202	CACCCGUAGAACCGACCUUGCG	5	6	3410.75	149.213	3649.17	125.314	experimental
131	he_38779	GAGUGGUUCAAUUCCACCUUUCGGGCG	5	7	1527.01	61.5457	177.167	13.0294	experimental
132	he_7253	CCUGGGCAACAUAGCGAGACCCCGUCUCUU	5	8	5016.44	149.38	1051.97	82.319	experimental
133	he_26559	AAUACAGGACUCUUUCGAGGCCCUGUAA	5	9	1239.98	43.8679	82.5648	7.38181	experimental
134	he_26836	AUGCAGAACAUCAUGAAUGACAUGCCG	5	10	264.954	16.8398	40.8796	4.41899	experimental
135	PUC2PM-20B		5	11	32380	364.473	26454.7	272.97	control	control_spike-calibration	LC Internal Use
136	xbz_26844	UGAGAACCACGUCUGCUCUGA	5	12	291.083	18.8844	105.287	14.1455	experimental
137	he_16205	AGCUGGUGUUGUGAAUCAGGCCGU	5	13	235.648	10.4634	46.1111	4.58427	experimental
138	xbz_11688	AUCUCGGACGAGCCCCCA	5	14	4299.03	187.663	842.407	60.8345	experimental
139	he_53591	AACUGUUUGCAGAGGAAACUGAGA	5	15	577	50.1944	436.898	33.973	experimental
140	he_12202	CACCCGUAGAACCGACCUUGCG	5	16	3337.09	121.235	3589.9	108.344	experimental
141	he_38779	GAGUGGUUCAAUUCCACCUUUCGGGCG	5	17	1488.8	70.1988	198.37	21.2042	experimental
142	he_7253	CCUGGGCAACAUAGCGAGACCCCGUCUCUU	5	18	4561.78	149.109	973.944	62.1726	experimental
143	he_26559	AAUACAGGACUCUUUCGAGGCCCUGUAA	5	19	1067.78	38.4565	76.3611	10.9429	experimental
144	he_26836	AUGCAGAACAUCAUGAAUGACAUGCCG	5	20	238.815	15.4709	38.8519	3.33437	experimental
145	PUC2PM-20B		5	21	30496.4	441.346	25869.3	152.467	control	control_spike-calibration	LC Internal Use
146	xbz_26844	UGAGAACCACGUCUGCUCUGA	5	22	292.62	19.6738	101.741	12.9517	experimental
147	he_16205	AGCUGGUGUUGUGAAUCAGGCCGU	5	23	275.667	15.1226	56.4815	7.68477	experimental
148	xbz_11688	AUCUCGGACGAGCCCCCA	5	24	4215.05	113.379	786.991	83.9194	experimental
149	he_53591	AACUGUUUGCAGAGGAAACUGAGA	5	25	517.639	37.4354	389.713	32.4147	experimental
150	he_12202	CACCCGUAGAACCGACCUUGCG	5	26	3221.37	83.9495	3107.93	91.0851	experimental
151	he_38779	GAGUGGUUCAAUUCCACCUUUCGGGCG	5	27	1607.68	193.301	232.028	63.1115	experimental
152	he_7253	CCUGGGCAACAUAGCGAGACCCCGUCUCUU	5	28	4835.21	181.796	984.731	33.4283	experimental
153	he_26559	AAUACAGGACUCUUUCGAGGCCCUGUAA	5	29	1196.06	51.637	87.6296	7.79359	experimental
154	he_26836	AUGCAGAACAUCAUGAAUGACAUGCCG	5	30	259.056	20.5912	39.6204	4.35937	experimental
155	PUC2PM-20B		5	31	31814.5	438.389	29102	353.639	control	control_spike-calibration	LC Internal Use
156	PUC2MM-20B		6	1	275.037	18.0839	49.5926	7.98952	control	control_spike-calibration	LC Internal Use
157	xbz_16439	AAGUGUUUGUGGGUUA	6	2	261.315	9.52581	34.4259	3.1451	experimental
158	he_11733	CAUUGCACUCGGUCUGA	6	3	317.398	30.3	77.6111	14.0871	experimental
159	xbz_3169	GCCCCUGGGCCUAUCCUAGAAC	6	4	633.759	59.4477	951.38	54.088	experimental
160	he_37871	UUAGCUCAGCAGGAAGAGCA	6	5	280.787	18.185	55	10.5742	experimental
161	he_17857	CACGCUCAUGCACACACCCACA	6	6	1859.87	101.668	416.102	42.4999	experimental
162	he_38881	CCUCUUACUGCUAAAUUGGACUGGCUU	6	7	357.935	25.6596	34.213	2.91644	experimental
163	he_7363	UGAUCACAACCAGUUACAGAUUUCUUUA	6	8	46747.5	402.267	1456.86	65.4572	experimental
164	he_53286	UCCCCCAGGUGUGAUUCUGAUUUG	6	9	650.139	34.9717	376.185	23.6644	experimental
165	he_33102	AUCAGUGAUGUGGAUCUAUUGACUGAGU	6	10	253.889	12.1543	34.7315	2.72958	experimental
166	PUC2MM-20B		6	11	256.231	12.0028	46.037	3.77628	control	control_spike-calibration	LC Internal Use
167	xbz_16439	AAGUGUUUGUGGGUUA	6	12	228.157	12.5617	31.4815	2.40902	experimental
168	he_11733	CAUUGCACUCGGUCUGA	6	13	271.111	21.1706	70.8241	15.7734	experimental
169	xbz_3169	GCCCCUGGGCCUAUCCUAGAAC	6	14	594.046	35.3211	1031.79	59.8311	experimental
170	he_37871	UUAGCUCAGCAGGAAGAGCA	6	15	269.528	9.4151	50.0093	8.03555	experimental
171	he_17857	CACGCUCAUGCACACACCCACA	6	16	1782.63	99.1494	470.361	35.2763	experimental
172	he_38881	CCUCUUACUGCUAAAUUGGACUGGCUU	6	17	405.194	55.6823	43.8148	3.13899	experimental
173	he_7363	UGAUCACAACCAGUUACAGAUUUCUUUA	6	18	43908.8	540.287	1405.81	65.7754	experimental
174	he_53286	UCCCCCAGGUGUGAUUCUGAUUUG	6	19	558.157	29.1952	346.296	35.79	experimental
175	he_33102	AUCAGUGAUGUGGAUCUAUUGACUGAGU	6	20	226.481	14.3504	31.787	2.3123	experimental
176	PUC2MM-20B		6	21	228.843	11.3518	47.4259	5.6638	control	control_spike-calibration	LC Internal Use
177	xbz_16439	AAGUGUUUGUGGGUUA	6	22	238.148	20.7373	36.9537	2.80981	experimental
178	he_11733	CAUUGCACUCGGUCUGA	6	23	279.435	17.501	60.713	5.0327	experimental
179	xbz_3169	GCCCCUGGGCCUAUCCUAGAAC	6	24	576.12	49.8716	947.213	47.2706	experimental
180	he_37871	UUAGCUCAGCAGGAAGAGCA	6	25	234.537	12.3163	44.3796	8.3226	experimental
181	he_17857	CACGCUCAUGCACACACCCACA	6	26	1704.08	71.3284	375.583	47.869	experimental
182	he_38881	CCUCUUACUGCUAAAUUGGACUGGCUU	6	27	344.917	25.0548	41.0185	5.76969	experimental
183	he_7363	UGAUCACAACCAGUUACAGAUUUCUUUA	6	28	43971.3	557.684	1353.04	63.4126	experimental
184	he_53286	UCCCCCAGGUGUGAUUCUGAUUUG	6	29	617.787	35.8622	396.889	35.762	experimental
185	he_33102	AUCAGUGAUGUGGAUCUAUUGACUGAGU	6	30	237.315	10.6021	33.8796	2.80093	experimental
186	PUC2MM-20B		6	31	252.204	20.4696	46.1759	6.91987	control	control_spike-calibration	LC Internal Use
187	a3-PUC2PM-20B		7	1	41965.3	503.065	35192	317.254	control	control_spike-calibration	LC Internal Use
188	xbz_16911	AAAUUGAUGGUGUAGUUA	7	2	355.037	276.652	42.3796	18.378	experimental
189	he_19849	UGAGGUAGAAGUUGGGCUGCU	7	3	300.139	14.1985	53.0833	5.65706	experimental
190	xbz_8230	AAUCUUGAGUUGUGAU	7	4	252.463	14.0682	35.7685	3.94733	experimental
191	he_49840	GCUGGUUUCAUAUGGUGGUUUAGA	7	5	982.75	56.5692	97.2407	12.1539	experimental
192	he_24677	GUACAGUACUGUGAUAACUGAAGA	7	6	486.259	41.5389	995.361	65.4143	experimental
193	he_38904	GCAGCUAGCUCAGUCGGUAGAGCAUGAG	7	7	20265.4	224.727	7499.99	223.066	experimental
194	he_8109	GGUUCCAUGGUGUAAUGGUUAGCAUG	7	8	304.296	16.08	49.1111	5.96459	experimental
195	he_35265	UGUUAUGAUGAGAUUCCACUUAAG	7	9	249.778	11.3206	44.7407	5.37625	experimental
196	he_32556	CUUUGAAAGGAUCGUCUUGUAUGGUG	7	10	266.056	17.9036	41.1111	4.09087	experimental
197	a3-PUC2PM-20B		7	11	41676.6	419.838	34823.2	412.975	control	control_spike-calibration	LC Internal Use
198	xbz_16911	AAAUUGAUGGUGUAGUUA	7	12	228.343	7.97328	33.2407	1.98532	experimental
199	he_19849	UGAGGUAGAAGUUGGGCUGCU	7	13	248.611	18.2085	50	7.81563	experimental
200	xbz_8230	AAUCUUGAGUUGUGAU	7	14	228.38	10.8608	35.0648	1.8458	experimental
201	he_49840	GCUGGUUUCAUAUGGUGGUUUAGA	7	15	977.398	68.9459	107.046	10.6625	experimental
202	he_24677	GUACAGUACUGUGAUAACUGAAGA	7	16	507.454	36.0364	1023.14	42.7943	experimental
203	he_38904	GCAGCUAGCUCAGUCGGUAGAGCAUGAG	7	17	19313.7	284.248	6946.99	211.221	experimental
204	he_8109	GGUUCCAUGGUGUAAUGGUUAGCAUG	7	18	273.407	13.3171	47.3333	3.58606	experimental
205	he_35265	UGUUAUGAUGAGAUUCCACUUAAG	7	19	237.389	12.4846	40.3796	4.01101	experimental
206	he_32556	CUUUGAAAGGAUCGUCUUGUAUGGUG	7	20	238.75	14.901	38.5185	5.14733	experimental
207	a3-PUC2PM-20B		7	21	37869.6	549.733	34101.6	263.318	control	control_spike-calibration	LC Internal Use
208	xbz_16911	AAAUUGAUGGUGUAGUUA	7	22	223.806	15.4542	34.3704	3.01272	experimental
209	he_19849	UGAGGUAGAAGUUGGGCUGCU	7	23	272.046	10.9659	54.7222	6.51645	experimental
210	xbz_8230	AAUCUUGAGUUGUGAU	7	24	228.315	15.0871	34.0833	2.5655	experimental
211	he_49840	GCUGGUUUCAUAUGGUGGUUUAGA	7	25	908.537	57.0008	104.157	10.396	experimental
212	he_24677	GUACAGUACUGUGAUAACUGAAGA	7	26	452.731	31.5205	856.315	43.3069	experimental
213	he_38904	GCAGCUAGCUCAGUCGGUAGAGCAUGAG	7	27	18588.3	300.013	6378.78	96.9896	experimental
214	he_8109	GGUUCCAUGGUGUAAUGGUUAGCAUG	7	28	276.231	32.0813	45.7963	4.86406	experimental
215	he_35265	UGUUAUGAUGAGAUUCCACUUAAG	7	29	242.861	9.96954	40.25	4.11318	experimental
216	he_32556	CUUUGAAAGGAUCGUCUUGUAUGGUG	7	30	251.639	19.7444	36.1759	3.61158	experimental
217	a3-PUC2PM-20B		7	31	41079.9	391.076	38730	611.493	control	control_spike-calibration	LC Internal Use
218	a3-PUC2MM-20B		8	1	257.231	13.3379	46.5648	4.51637	control	control_spike-calibration	LC Internal Use
219	xbz_27606	UACGUCAUCGUUGUCAUCGUCA	8	2	292.38	8.61396	61.3704	8.97306	experimental
220	he_12051	UGAGACCUCUGGGUUCUGAGC	8	3	294.843	16.7394	109.685	15.1341	experimental
221	xbz_8049	AACCCGUAGAUCCGAUCUUGUG	8	4	941.481	40.7483	801.463	38.0603	experimental
222	he_31400	AAAAGUAUUUGCGGGUUUUGU	8	5	247.787	12	34.4167	2.66204	experimental
223	he_26314	AAUGGCGCCACUAGGGUUGUGC	8	6	418.167	31.852	173.259	23.1776	experimental
224	he_39032	AAACUGUGAUGAGGCACAAACUGAGU	8	7	280.157	19.8702	36.537	3.12489	experimental
225	he_8209	UCUGUAGUGUAGUGGUUAUCACGUUU	8	8	1369.56	79.9595	75.8981	14.4907	experimental
226	he_53509	UUGGGGACAUUUUGCAUUCAU	8	9	252.333	13.9089	39.1019	4.08082	experimental
227	he_51829	CAUACGCACGUAGACAUUCCCCGCUUCCC	8	10	286.148	16.2071	46.0185	4.62011	experimental
228	a3-PUC2MM-20B		8	11	271.546	21.1905	50.037	6.74908	control	control_spike-calibration	LC Internal Use
229	xbz_27606	UACGUCAUCGUUGUCAUCGUCA	8	12	266.843	13.1655	65.787	10.6762	experimental
230	he_12051	UGAGACCUCUGGGUUCUGAGC	8	13	238.667	10.7868	85.8333	8.51552	experimental
231	xbz_8049	AACCCGUAGAUCCGAUCUUGUG	8	14	870.028	47.5667	871.111	52.8055	experimental
232	he_31400	AAAAGUAUUUGCGGGUUUUGU	8	15	245.111	15.4111	34.6111	3.64764	experimental
233	he_26314	AAUGGCGCCACUAGGGUUGUGC	8	16	404.676	25.6762	200.806	26.4997	experimental
234	he_39032	AAACUGUGAUGAGGCACAAACUGAGU	8	17	319.13	42.4916	46.3148	4.09159	experimental
235	he_8209	UCUGUAGUGUAGUGGUUAUCACGUUU	8	18	1300.17	57.0908	69.3981	8.54011	experimental
236	he_53509	UUGGGGACAUUUUGCAUUCAU	8	19	224.306	10.7203	37.5926	3.29836	experimental
237	he_51829	CAUACGCACGUAGACAUUCCCCGCUUCCC	8	20	254.102	15.8739	40.7315	5.9509	experimental
238	a3-PUC2MM-20B		8	21	240.222	18.878	50.2407	5.11708	control	control_spike-calibration	LC Internal Use
239	xbz_27606	UACGUCAUCGUUGUCAUCGUCA	8	22	273.639	17.3332	71.0741	10.3171	experimental
240	he_12051	UGAGACCUCUGGGUUCUGAGC	8	23	269.102	22.9945	100.204	14.8763	experimental
241	xbz_8049	AACCCGUAGAUCCGAUCUUGUG	8	24	832.306	37.2605	815.343	56.9287	experimental
242	he_31400	AAAAGUAUUUGCGGGUUUUGU	8	25	203.509	11.8507	30.4722	2.27731	experimental
243	he_26314	AAUGGCGCCACUAGGGUUGUGC	8	26	358.796	29.3132	157.528	20.7497	experimental
244	he_39032	AAACUGUGAUGAGGCACAAACUGAGU	8	27	245.231	17.1162	37.7593	3.09316	experimental
245	he_8209	UCUGUAGUGUAGUGGUUAUCACGUUU	8	28	1274.05	97.0008	62.2593	9.77539	experimental
246	he_53509	UUGGGGACAUUUUGCAUUCAU	8	29	239.38	13.1779	33.75	3.74197	experimental
247	he_51829	CAUACGCACGUAGACAUUCCCCGCUUCCC	8	30	279.426	19.4827	44.4907	6.62126	experimental
248	a3-PUC2MM-20B		8	31	253.991	19.4847	47.8611	4.32653	control	control_spike-calibration	LC Internal Use
249	rt_chr3_E_1	AAAGACCUGGCUUGUAAUUCUUUUAACCCCUG	9	1	260.278	15.4271	34.9537	4.36936	experimental
250	xbz_27642	AAAAGCUGGGUUGAGAGGGCGA	9	2	7439.1	211.828	6860.17	244.851	experimental
251	he_6625	AGAGAAAGGAAACUUAGAUCUGUC	9	3	268.093	15.0833	34.2315	2.91822	experimental
252	xbz_9343	AAGGAGCUCACAGUCUAUUGAG	9	4	1667.74	75.9977	1081.66	61.5407	experimental
253	he_35606	CCGCGCGGGGGGCCCGGGC	9	5	35021.7	398.238	2742.3	111.48	experimental
254	he_17154	ACCAAUAUUACUGUGCUGCUUU	9	6	266.083	15.327	42.1944	5.64273	experimental
255	he_39049	GACUUGUGAUGAAUCUUGGCUUCCUGAAG	9	7	257.602	9.0852	36.4722	3.59246	experimental
256	he_8520	GGGGGUAUAGCUCAGUGGGUAGAGCAUUU	9	8	19321.6	264.887	3312.45	75.4039	experimental
257	he_38045	UGAGGUAGUAUUUUUUGUUGUUUGUUUU	9	9	253.833	13.1813	36.0093	3.33628	experimental
258	he_39085	AUGUGAUGUCAGGGCCUGCGUGGUAA	9	10	265.139	23.2614	43.9352	5.66391	experimental
259	rt_chr4_A_3	UUGUCUUACUUUCCUCACAUAAGGAGUUAUUU	9	11	248.611	16.9457	33.3889	2.41813	experimental
260	xbz_27642	AAAAGCUGGGUUGAGAGGGCGA	9	12	7056.69	163.045	6550.6	137.593	experimental
261	he_6625	AGAGAAAGGAAACUUAGAUCUGUC	9	13	231.907	8.45056	36.6759	5.65161	experimental
262	xbz_9343	AAGGAGCUCACAGUCUAUUGAG	9	14	1584.92	95.8218	1197.47	34.4564	experimental
263	he_35606	CCGCGCGGGGGGCCCGGGC	9	15	31673.8	353.527	2952.31	85.1168	experimental
264	he_17154	ACCAAUAUUACUGUGCUGCUUU	9	16	275.852	21.5991	59.037	3.68104	experimental
265	he_39049	GACUUGUGAUGAAUCUUGGCUUCCUGAAG	9	17	244.111	13.6781	44.463	4.88068	experimental
266	he_8520	GGGGGUAUAGCUCAGUGGGUAGAGCAUUU	9	18	18021.7	247.278	3056.32	54.7739	experimental
267	he_38045	UGAGGUAGUAUUUUUUGUUGUUUGUUUU	9	19	225.843	15.1227	32.3241	2.83776	experimental
268	he_39085	AUGUGAUGUCAGGGCCUGCGUGGUAA	9	20	231.62	9.64774	36.5741	3.71208	experimental
269	rt_chr6_A_5	UUAGUUCUCUAUUCUUAUCAUUGAUUAUCAGA	9	21	220.306	13.2795	32.2407	1.3799	experimental
270	xbz_27642	AAAAGCUGGGUUGAGAGGGCGA	9	22	6686.77	141.973	5912.28	150.789	experimental
271	he_6625	AGAGAAAGGAAACUUAGAUCUGUC	9	23	255.287	28.5431	40.213	4.16494	experimental
272	xbz_9343	AAGGAGCUCACAGUCUAUUGAG	9	24	1510.95	47.2043	1024.41	60.9846	experimental
273	he_35606	CCGCGCGGGGGGCCCGGGC	9	25	30710	635.581	2633.58	51.5915	experimental
274	he_17154	ACCAAUAUUACUGUGCUGCUUU	9	26	258.435	24.0161	43.6019	7.26011	experimental
275	he_39049	GACUUGUGAUGAAUCUUGGCUUCCUGAAG	9	27	225.778	8.38928	39.3056	3.7776	experimental
276	he_8520	GGGGGUAUAGCUCAGUGGGUAGAGCAUUU	9	28	18027.1	160.618	3043.45	74.2905	experimental
277	he_38045	UGAGGUAGUAUUUUUUGUUGUUUGUUUU	9	29	244.194	12.5329	32.5926	3.13866	experimental
278	he_39085	AUGUGAUGUCAGGGCCUGCGUGGUAA	9	30	255.287	13.9197	42.6574	3.18631	experimental
279	chr2_D_1	AUUCAAAGACAAGAUUAUAUCUGCUUUUUAUU	9	31	247.583	16.0199	31.7593	2.39497	experimental
280	chr11_A_7	GCUCUGCCCCACUUUCCUCACUCCAGGACUCA	10	1	263.824	11.7488	36.4722	4.01273	experimental
281	xbz_27054	GGGCGGCUUGCAGAGCGGCCA	10	2	2017.1	87.9326	148.852	21.3759	experimental
282	he_4926	AGGCAGUGUCAUUAGCUGAUUGU	10	3	286.5	19.8172	168.954	18.8786	experimental
283	xbz_4638	AAGGUAGAUAGAACAGGUCUUG	10	4	800.046	38.2809	472.241	41.7095	experimental
284	he_49837	ACUGAUUUCUUUUGGUGUUCAGA	10	5	244.583	18.0016	37.6852	3.68033	experimental
285	he_25626	CAUUAUUACUUUUGGUACGCG	10	6	308.444	41.4817	35.8426	3.91059	experimental
286	he_39302	GCCUUGGUGUAUAGUGGUGAGCAUAGCU	10	7	27455.5	290.812	3198.19	106.781	experimental
287	he_8569	UGGAAGACUAGUGAUUUUGUUGUUGU	10	8	408.417	35.5925	112.398	13.5522	experimental
288	he_29697	CUGAAGACGAAUAAGAAUUUGUAG	10	9	252.833	15.5723	35.8241	2.5017	experimental
289	he_52010	UUGCAGUACUUCCAGGAAUGGUGCACCA	10	10	506.009	31.7815	244.676	23.5832	experimental
290	chr2_B_2	AAAUAGUAAAUUUUAAUGAUCAGAUUUAAAAU	10	11	234.278	17.9427	27.75	1.94372	experimental
291	xbz_27054	GGGCGGCUUGCAGAGCGGCCA	10	12	1885.19	83.9757	129.593	17.4651	experimental
292	he_4926	AGGCAGUGUCAUUAGCUGAUUGU	10	13	257.426	16.8135	148.491	17.4723	experimental
293	xbz_4638	AAGGUAGAUAGAACAGGUCUUG	10	14	720.769	50.2092	514.981	45.6668	experimental
294	he_49837	ACUGAUUUCUUUUGGUGUUCAGA	10	15	238.38	13.305	40.4815	3.70522	experimental
295	he_25626	CAUUAUUACUUUUGGUACGCG	10	16	251.639	15.4227	37.5278	2.70153	experimental
296	he_39302	GCCUUGGUGUAUAGUGGUGAGCAUAGCU	10	17	26331.2	424.552	2885.29	69.1455	experimental
297	he_8569	UGGAAGACUAGUGAUUUUGUUGUUGU	10	18	396.796	32.1915	105.417	12.6485	experimental
298	he_29697	CUGAAGACGAAUAAGAAUUUGUAG	10	19	233.12	18.5924	31.9352	2.8817	experimental
299	he_52010	UUGCAGUACUUCCAGGAAUGGUGCACCA	10	20	403.361	32.5181	228.102	19.1926	experimental
300	chr18_B_3	CUAUAGGGACAGCCAAGGCCUGAGUGCUAGGA	10	21	235.435	13.2328	35.4907	3.6519	experimental
301	xbz_27054	GGGCGGCUUGCAGAGCGGCCA	10	22	1903.95	87.1691	135.176	17.702	experimental
302	he_4926	AGGCAGUGUCAUUAGCUGAUUGU	10	23	257.185	16.5265	158.194	15.5434	experimental
303	xbz_4638	AAGGUAGAUAGAACAGGUCUUG	10	24	633.926	46.4033	449.944	31.109	experimental
304	he_49837	ACUGAUUUCUUUUGGUGUUCAGA	10	25	224.778	11.3462	37.6759	3.3651	experimental
305	he_25626	CAUUAUUACUUUUGGUACGCG	10	26	234.556	10.9394	30.8796	4.8157	experimental
306	he_39302	GCCUUGGUGUAUAGUGGUGAGCAUAGCU	10	27	25414.6	290.371	2795.73	54.8063	experimental
307	he_8569	UGGAAGACUAGUGAUUUUGUUGUUGU	10	28	401.25	31.1061	117.213	22.6365	experimental
308	he_29697	CUGAAGACGAAUAAGAAUUUGUAG	10	29	234.889	15.6021	32.1852	3.51272	experimental
309	he_52010	UUGCAGUACUUCCAGGAAUGGUGCACCA	10	30	438.037	34.6256	260.5	18.0878	experimental
310	empty		10	31	212.796	14.0245	27.6852	3.17893	control	control_empty
311	chr9_B_6	AAUAUACUUGUAUUUAUUUACUAUUACCACAG	11	1	238.083	12.2575	31.1204	2.97252	experimental
312	xbz_18744	GAAGGUUUAGAUGUUACU	11	2	239.481	13.7796	34.6944	2.8034	experimental
313	he_17193	UGAGUUAGUAGAUGUGUGGUUU	11	3	248.898	11.4736	35.6667	4.07867	experimental
314	xbz_6473	CACCCGUAGAACCGACCUUGCG	11	4	3473.64	150.608	3131.2	108.538	experimental
315	he_43858	AAUUUAGGACUAUGUAGCAUA	11	5	241.519	12.9481	31.2593	3.81921	experimental
316	he_23414	UAAUAACAGUAGUAGACAACGUUUA	11	6	242.028	16.2121	29	1.99532	experimental
317	he_39456	GGCCGGUUAGCUCAGUUGGUUAGAGCAUGG	11	7	1331.31	89.2357	306.426	45.045	experimental
318	he_8749	UCUGGUGAUGAAAUGGAACGUUUCUGAUG	11	8	255.417	10.2976	40.9815	5.06773	experimental
319	he_45492	AACUAUUUAAGAUACAUUGG	11	9	246.944	11.3499	33.6204	3.11078	experimental
320	he_35232	UACAUGCCGACGGGCACUGACCUCCUU	11	10	1919.02	97.3185	386.704	30.9873	experimental
321	chr10_C_2	AAUAUUUCACAUUCUUUAGAAAGUUUGUUUUU	11	11	216.389	11.5345	28.8148	2.13624	experimental
322	xbz_18744	GAAGGUUUAGAUGUUACU	11	12	232	15.7243	30.3889	2.79463	experimental
323	he_17193	UGAGUUAGUAGAUGUGUGGUUU	11	13	228.907	13.7389	34.2222	3.12462	experimental
324	xbz_6473	CACCCGUAGAACCGACCUUGCG	11	14	3127.56	73.9018	3442.11	102.022	experimental
325	he_43858	AAUUUAGGACUAUGUAGCAUA	11	15	227.981	8.30829	33.1019	2.46448	experimental
326	he_23414	UAAUAACAGUAGUAGACAACGUUUA	11	16	250.917	20.5309	39.1111	2.66628	experimental
327	he_39456	GGCCGGUUAGCUCAGUUGGUUAGAGCAUGG	11	17	1332.41	108.263	295.093	29.5235	experimental
328	he_8749	UCUGGUGAUGAAAUGGAACGUUUCUGAUG	11	18	231.602	19.1492	37.3889	3.99025	experimental
329	he_45492	AACUAUUUAAGAUACAUUGG	11	19	220.417	15.258	33.8241	3.58822	experimental
330	he_35232	UACAUGCCGACGGGCACUGACCUCCUU	11	20	1768.62	111.758	416.361	41.5486	experimental
331	chr2_B_2	AAAUAGUAAAUUUUAAUGAUCAGAUUUAAAAU	11	21	215.463	12.5731	30.5741	1.3889	experimental
332	xbz_18744	GAAGGUUUAGAUGUUACU	11	22	229.278	12.2831	33.5278	3.07981	experimental
333	he_17193	UGAGUUAGUAGAUGUGUGGUUU	11	23	234.509	15.2024	36.7593	3.81309	experimental
334	xbz_6473	CACCCGUAGAACCGACCUUGCG	11	24	3083.64	108.348	2972.2	115.308	experimental
335	he_43858	AAUUUAGGACUAUGUAGCAUA	11	25	225.287	15.5792	30.3241	3.37065	experimental
336	he_23414	UAAUAACAGUAGUAGACAACGUUUA	11	26	228.62	8.81027	30.8796	3.70076	experimental
337	he_39456	GGCCGGUUAGCUCAGUUGGUUAGAGCAUGG	11	27	1289.93	55.6674	284.5	26.2662	experimental
338	he_8749	UCUGGUGAUGAAAUGGAACGUUUCUGAUG	11	28	236.898	16.3055	35.7778	3.75744	experimental
339	he_45492	AACUAUUUAAGAUACAUUGG	11	29	239.028	18.1713	32.4259	3.8795	experimental
340	he_35232	UACAUGCCGACGGGCACUGACCUCCUU	11	30	1843.52	70.1674	425.519	33.947	experimental
341	rt_chr2_B_1	UUUGAUUGUUAUUUAUUGACUUGUGUUUGUCU	11	31	210.009	13.6994	27.6019	2.87737	experimental
342	chr13_D_6	UGGCCACAUUUCUCCUGGUAUAAGUCACUUGC	12	1	238.333	13.8274	31.7407	2.68039	experimental
343	xbz_27253	AGGCGGAGACUUGGGCAAUUG	12	2	423.417	32.2592	58.5185	7.25179	experimental
344	he_14144	ACAUCGAAACUCUGGAAAAAG	12	3	258.667	14.7699	38.4352	5.16688	experimental
345	xbz_13871	CAGUCCAUGGGCAUAUACACUU	12	4	351.12	25.8185	198.389	21.5683	experimental
346	he_41210	UCCUCAUUUGUAUAGUGGUGAGUA	12	5	2862.07	194.959	78.287	17.3943	experimental
347	he_25328	GCAGUCCAUGGGCAUAUACACU	12	6	403.296	33.7058	261.991	20.4512	experimental
348	he_39736	CUUCUCAUUACUGCACUUGACUAGUCUU	12	7	9647.42	305.72	208.833	16.9168	experimental
349	he_8774	AGGGAUUGUGGGUUCGAGUCCCACCCGG	12	8	991.222	57.1943	144.944	16.7175	experimental
350	he_30693	CCUGGGUGACAAAGGGAGAUUCUGGUUU	12	9	243.333	7.408	35.4722	3.72026	experimental
351	he_38877	GAAAUUCAUAAAGUACAGACAUGUUUU	12	10	248.343	15.1819	32.1759	3.70105	experimental
352	rt_chr1_A_1	AUAGCCAAAACUGUCUUGAAAUAGAACAAAGU	12	11	215.259	13.5041	28.6204	2.12118	experimental
353	xbz_27253	AGGCGGAGACUUGGGCAAUUG	12	12	377.444	19.6523	50.0463	7.34896	experimental
354	he_14144	ACAUCGAAACUCUGGAAAAAG	12	13	239.481	18.383	36.3519	4.91291	experimental
355	xbz_13871	CAGUCCAUGGGCAUAUACACUU	12	14	344.907	30.8438	203.815	25.1512	experimental
356	he_41210	UCCUCAUUUGUAUAGUGGUGAGUA	12	15	3619.81	212.715	100.861	14.7645	experimental
357	he_25328	GCAGUCCAUGGGCAUAUACACU	12	16	403.028	22.3123	291.926	24.2675	experimental
358	he_39736	CUUCUCAUUACUGCACUUGACUAGUCUU	12	17	9374.65	290.583	241.287	25.5734	experimental
359	he_8774	AGGGAUUGUGGGUUCGAGUCCCACCCGG	12	18	883.722	62.7165	144.12	19.7596	experimental
360	he_30693	CCUGGGUGACAAAGGGAGAUUCUGGUUU	12	19	230.778	13.9159	35.2315	3.84418	experimental
361	he_38877	GAAAUUCAUAAAGUACAGACAUGUUUU	12	20	226.352	17.0745	30.6481	4.48948	experimental
362	chr10_C_2	AAUAUUUCACAUUCUUUAGAAAGUUUGUUUUU	12	21	211.574	7.78592	31.9815	2.73086	experimental
363	xbz_27253	AGGCGGAGACUUGGGCAAUUG	12	22	415.12	36.1972	56.3981	9.34984	experimental
364	he_14144	ACAUCGAAACUCUGGAAAAAG	12	23	248.296	9.79153	38	3.75413	experimental
365	xbz_13871	CAGUCCAUGGGCAUAUACACUU	12	24	321.491	33.2424	181.722	26.6665	experimental
366	he_41210	UCCUCAUUUGUAUAGUGGUGAGUA	12	25	3765.43	219.171	87.7778	12.9495	experimental
367	he_25328	GCAGUCCAUGGGCAUAUACACU	12	26	398.898	32.7691	264.509	21.976	experimental
368	he_39736	CUUCUCAUUACUGCACUUGACUAGUCUU	12	27	9204.68	177.308	218.88	21.9697	experimental
369	he_8774	AGGGAUUGUGGGUUCGAGUCCCACCCGG	12	28	957.954	49.6926	144.824	15.3506	experimental
370	he_30693	CCUGGGUGACAAAGGGAGAUUCUGGUUU	12	29	248.917	12.8842	35.1852	5.45011	experimental
371	he_38877	GAAAUUCAUAAAGUACAGACAUGUUUU	12	30	242.333	14.5686	33.9907	3.97303	experimental
372	rt_chr6_A_5	UUAGUUCUCUAUUCUUAUCAUUGAUUAUCAGA	12	31	214.611	14.2808	26.8333	2.51166	experimental
373	rt_chr2_D_2	AGGAUUGCAGUCACUGCAUGAAGUUAGUCACC	13	1	246.815	11.9853	35.4074	4.23611	experimental
374	xbz_25711	UUAUGGUUUGCCUGGGACUGA	13	2	1334	68.9236	964.833	49.0858	experimental
375	he_19909	CUUAACUUGACCUCUUUAAA	13	3	252.046	13.0501	33.25	3.44007	experimental
376	xbz_11369	UAGAGGAGAUGGCGCAGGGG	13	4	652.213	41.5861	121.593	19.3628	experimental
377	he_38547	CUGGAGAUAUGGAAGAGCUGUGU	13	5	251.315	15.5423	37.9444	5.40307	experimental
378	he_18545	UGGAAAUGAUGAUUAUACUGAUU	13	6	249.565	21.1754	31.9352	3.00241	experimental
379	he_39883	CCGUGGUGGUAUAGUGGUGAGCAUAGCU	13	7	30477.3	530.751	4424.76	175.054	experimental
380	he_8776	GGCUCGUUGGUCUAGGGGUGUGGUUCUC	13	8	54030.6	336.594	20081.9	337.268	experimental
381	he_35260	UUGUGACUGUUCCUGGUAUUGAUU	13	9	236.213	14.0247	34.5	2.86617	experimental
382	he_27781	UGUGGAUAAAGGAGAAAACUACUGUU	13	10	250.491	13.5767	35.5833	3.65351	experimental
383	rt_chr9_F_1	AGCCUGCUGCUGUAGCCAAGACAGCUUGUUUU	13	11	222.213	12.9312	30.713	2.79536	experimental
384	xbz_25711	UUAUGGUUUGCCUGGGACUGA	13	12	1219.44	79.1416	910.407	94.2605	experimental
385	he_19909	CUUAACUUGACCUCUUUAAA	13	13	230.574	14.8016	31.7593	3.78109	experimental
386	xbz_11369	UAGAGGAGAUGGCGCAGGGG	13	14	591.389	54.9038	134.787	8.20537	experimental
387	he_38547	CUGGAGAUAUGGAAGAGCUGUGU	13	15	241.287	12.4436	41.2593	4.02648	experimental
388	he_18545	UGGAAAUGAUGAUUAUACUGAUU	13	16	234.009	14.7379	35.3981	2.64377	experimental
389	he_39883	CCGUGGUGGUAUAGUGGUGAGCAUAGCU	13	17	29495.4	257.355	4055.82	89.8689	experimental
390	he_8776	GGCUCGUUGGUCUAGGGGUGUGGUUCUC	13	18	50002.5	681.313	17861.4	366.493	experimental
391	he_35260	UUGUGACUGUUCCUGGUAUUGAUU	13	19	223.204	14.6503	34.463	3.79233	experimental
392	he_27781	UGUGGAUAAAGGAGAAAACUACUGUU	13	20	229.037	12.5608	33.8333	3.57431	experimental
393	rt_chr1_A_1	AUAGCCAAAACUGUCUUGAAAUAGAACAAAGU	13	21	207.537	10.864	32.25	2.19228	experimental
394	xbz_25711	UUAUGGUUUGCCUGGGACUGA	13	22	1185.5	98.8174	826.454	59.2633	experimental
395	he_19909	CUUAACUUGACCUCUUUAAA	13	23	231.926	15.6687	33.537	4.48346	experimental
396	xbz_11369	UAGAGGAGAUGGCGCAGGGG	13	24	547.648	41.3427	105.306	15.1247	experimental
397	he_38547	CUGGAGAUAUGGAAGAGCUGUGU	13	25	232.389	15.2437	33.1111	3.49187	experimental
398	he_18545	UGGAAAUGAUGAUUAUACUGAUU	13	26	225.352	14.3496	28.713	3.29557	experimental
399	he_39883	CCGUGGUGGUAUAGUGGUGAGCAUAGCU	13	27	28450.5	311.85	3972.44	126.01	experimental
400	he_8776	GGCUCGUUGGUCUAGGGGUGUGGUUCUC	13	28	50507.8	553.306	17939	220.82	experimental
401	he_35260	UUGUGACUGUUCCUGGUAUUGAUU	13	29	237.278	13.6518	33.7222	3.15587	experimental
402	he_27781	UGUGGAUAAAGGAGAAAACUACUGUU	13	30	240.12	13.3604	35.3241	4.07827	experimental
403	chr18_B_3	CUAUAGGGACAGCCAAGGCCUGAGUGCUAGGA	13	31	234.481	19.5589	33.5741	3.80163	experimental
404	rt_chr1_G_1	UUUUAUUAUGUAUAAAAAUUUGAUUAUAAAUC	14	1	239.769	13.1835	31.8981	2.25455	experimental
405	xbz_26134	AAUUUCGGUUGGGGA	14	2	278.231	20.6713	40.9167	4.27364	experimental
406	he_8862	AACUGGCCCUCAAAGUCCCGCU	14	3	768.889	49.1972	459.389	36.5475	experimental
407	xbz_9334	UCCCUUUGGAGCUGAUU	14	4	255.065	20.2495	36.4537	5.12714	experimental
408	he_29970	AGCAGCAUUGUACAGGGCUAUC	14	5	7396.54	279.985	15066.2	330.558	experimental
409	he_21320	GAGUUCUUCCUACGAUC	14	6	234.88	10.3262	36.4444	6.36629	experimental
410	he_40110	UGGGGUAUAGCUCAGUGGUAGAGCAUUUG	14	7	11681.6	471.073	1757.86	69.2593	experimental
411	he_8778	AGGCUCGUUGGUCUAGGGGUAUGAUUCUC	14	8	57298.9	490.749	22978	486.424	experimental
412	he_26836	AUGCAGAACAUCAUGAAUGACAUGCCG	14	9	252.38	15.7318	35.9537	4.31988	experimental
413	he_52065	GCCAUAGCCCGGUCGCUGGUACAUGA	14	10	245.685	15.9301	66.1944	9.09396	experimental
414	rt_chr2_B_1	UUUGAUUGUUAUUUAUUGACUUGUGUUUGUCU	14	11	216.981	16.5834	27.2407	2.50558	experimental
415	xbz_26134	AAUUUCGGUUGGGGA	14	12	258.417	27.7445	37.9537	6.85822	experimental
416	he_8862	AACUGGCCCUCAAAGUCCCGCU	14	13	701.926	56.7186	447.296	37.2665	experimental
417	xbz_9334	UCCCUUUGGAGCUGAUU	14	14	224.269	11.4896	37.4074	3.69146	experimental
418	he_29970	AGCAGCAUUGUACAGGGCUAUC	14	15	7011.27	119.58	16454.1	370.038	experimental
419	he_21320	GAGUUCUUCCUACGAUC	14	16	239.093	13.781	40.9167	3.68154	experimental
420	he_40110	UGGGGUAUAGCUCAGUGGUAGAGCAUUUG	14	17	11474	309.98	1631.93	59.0171	experimental
421	he_8778	AGGCUCGUUGGUCUAGGGGUAUGAUUCUC	14	18	53447	464.146	20468.5	309.179	experimental
422	he_26836	AUGCAGAACAUCAUGAAUGACAUGCCG	14	19	231.787	15.7972	36.9444	3.97382	experimental
423	he_52065	GCCAUAGCCCGGUCGCUGGUACAUGA	14	20	215.306	9.92444	50.8148	7.23975	experimental
424	rt_chr9_F_1	AGCCUGCUGCUGUAGCCAAGACAGCUUGUUUU	14	21	211.944	11.4262	37.0648	3.22164	experimental
425	xbz_26134	AAUUUCGGUUGGGGA	14	22	243.12	12.967	40.5463	4.89971	experimental
426	he_8862	AACUGGCCCUCAAAGUCCCGCU	14	23	647.389	46.6494	432.407	20.9891	experimental
427	xbz_9334	UCCCUUUGGAGCUGAUU	14	24	208.87	12.5736	34.5	3.34748	experimental
428	he_29970	AGCAGCAUUGUACAGGGCUAUC	14	25	6537.02	224.584	14574.5	243.427	experimental
429	he_21320	GAGUUCUUCCUACGAUC	14	26	219.389	14.1678	33.5926	3.20058	experimental
430	he_40110	UGGGGUAUAGCUCAGUGGUAGAGCAUUUG	14	27	11332.7	172.757	1595.07	90.7415	experimental
431	he_8778	AGGCUCGUUGGUCUAGGGGUAUGAUUCUC	14	28	53111.3	325.326	20301	272.232	experimental
432	he_26836	AUGCAGAACAUCAUGAAUGACAUGCCG	14	29	246.731	17.1582	35.6296	2.98154	experimental
433	he_52065	GCCAUAGCCCGGUCGCUGGUACAUGA	14	30	243.528	25.6331	60.3426	9.91757	experimental
434	chr2_D_1	AUUCAAAGACAAGAUUAUAUCUGCUUUUUAUU	14	31	211.991	14.2235	28.9815	2.22131	experimental
435	hsa-5S-b1		15	1	16825.5	249.432	7156.69	177.16	control	control_biosequences	LC Internal Use
436	xbz_20511	CGGAGCUGGGGAUUGUGGGU	15	2	10277.6	167.025	983.009	46.0027	experimental
437	he_21878	UGAAUGAUUAAAGGUCUUGGGGCC	15	3	2203.16	90.9871	262.389	31.8709	experimental
438	xbz_8692	GUUCUACAGUCCACGGAUC	15	4	242.722	17.6671	39.037	6.53091	experimental
439	he_53589	CAAGUCACUAGUGGUUCCGUUUAG	15	5	3213.75	104.82	3514.71	166.813	experimental
440	he_11072	GUGGAGUGUGACAAUGGUGUUUG	15	6	256.935	14.7865	33.3611	2.90169	experimental
441	he_40138	ACUGCCCUGGCGGAACGCUGAGAAGAC	15	7	45795.6	327.317	25472.4	369.376	experimental
442	he_8779	AAGCCCGGCUAGCUCAGUCGGUAGAGCAUG	15	8	17826	282.248	6559.47	224.133	experimental
443	he_26695	AAUGGAUCUGGGUGGCCACGUGA	15	9	268.278	19.2047	40.7593	4.45092	experimental
444	he_39482	UAAGCUGCUAUGUAUGGAUUUAAACCGU	15	10	244.574	14.7997	34.9259	3.95229	experimental
445	hsa-5S-b1		15	11	16054.1	297.515	7094.28	292.047	control	control_biosequences	LC Internal Use
446	xbz_20511	CGGAGCUGGGGAUUGUGGGU	15	12	9408.19	208.169	888.074	51.5699	experimental
447	he_21878	UGAAUGAUUAAAGGUCUUGGGGCC	15	13	2093.93	108.595	260.037	23.47	experimental
448	xbz_8692	GUUCUACAGUCCACGGAUC	15	14	243.361	14.0569	41.4259	4.08371	experimental
449	he_53589	CAAGUCACUAGUGGUUCCGUUUAG	15	15	3099.06	97.2196	3800.93	111.449	experimental
450	he_11072	GUGGAGUGUGACAAUGGUGUUUG	15	16	241.491	12.8248	40.8426	4.3194	experimental
451	he_40138	ACUGCCCUGGCGGAACGCUGAGAAGAC	15	17	43326.7	577.648	22925.2	512.868	experimental
452	he_8779	AAGCCCGGCUAGCUCAGUCGGUAGAGCAUG	15	18	16474.9	304.42	5805.17	119.095	experimental
453	he_26695	AAUGGAUCUGGGUGGCCACGUGA	15	19	223.259	12.767	34.6389	3.11	experimental
454	he_39482	UAAGCUGCUAUGUAUGGAUUUAAACCGU	15	20	223.833	15.4663	31.7593	2.9667	experimental
455	hsa-5S-b1		15	21	15527	321.765	6866.56	90.6395	control	control_biosequences	LC Internal Use
456	xbz_20511	CGGAGCUGGGGAUUGUGGGU	15	22	9098.48	271.875	868.361	49.0911	experimental
457	he_21878	UGAAUGAUUAAAGGUCUUGGGGCC	15	23	1958.73	105.644	246.287	26.1187	experimental
458	xbz_8692	GUUCUACAGUCCACGGAUC	15	24	223.454	17.734	33.3704	2.92138	experimental
459	he_53589	CAAGUCACUAGUGGUUCCGUUUAG	15	25	2860.51	157.783	3305	136.432	experimental
460	he_11072	GUGGAGUGUGACAAUGGUGUUUG	15	26	228.907	20.7983	30.6574	3.58648	experimental
461	he_40138	ACUGCCCUGGCGGAACGCUGAGAAGAC	15	27	42505.5	512.916	21396.7	210.591	experimental
462	he_8779	AAGCCCGGCUAGCUCAGUCGGUAGAGCAUG	15	28	16440.5	222.107	5830.82	115.248	experimental
463	he_26695	AAUGGAUCUGGGUGGCCACGUGA	15	29	251.009	18.717	37.2407	3.9099	experimental
464	he_39482	UAAGCUGCUAUGUAUGGAUUUAAACCGU	15	30	241.231	12.1414	34.5926	4.59589	experimental
465	hsa-5S-b1		15	31	17009.5	215.914	7865.43	178.141	control	control_biosequences	LC Internal Use
466	hsa-5S-b2		16	1	38971.3	564.177	40594.9	419.735	control	control_biosequences	LC Internal Use
467	xbz_19786	AAAAAUUUCUGUUGGGUA	16	2	254.204	13.2804	32.7778	2.78626	experimental
468	he_9903	UGGGUCUUUGCGGGCGAGAUGA	16	3	585.556	29.0711	187.704	21.2058	experimental
469	xbz_9202	ACCAAUAUUACUGUGCUGCUUU	16	4	279.306	10.6845	46.75	6.6475	experimental
470	he_27500	AUGGGUGAAUUUGUAGAAGGAU	16	5	237.926	10.5836	33.8611	4.17706	experimental
471	he_6383	AGAAAUGAUGUUAUUCUGAAA	16	6	234.481	11.2785	29.7963	2.15632	experimental
472	he_40142	ACUUCUUAGAGGGACAAGUGGCGUUC	16	7	16891.2	271.402	2863.37	149.33	experimental
473	he_8797	GUGACUGAGUCUUAAGCAAUGAUGCG	16	8	248.093	12.0587	35.1389	2.07098	experimental
474	he_43902	UGGAAAUGAUGAAAUAGAGA	16	9	238.778	9.01228	32.9444	3.69853	experimental
475	he_52106	GCCCAGCUAGCUCAGUCGGUAGAGGAUA	16	10	5415.88	137.62	943.065	69.293	experimental
476	hsa-5S-b2		16	11	37754.7	646.491	39433	438.886	control	control_biosequences	LC Internal Use
477	xbz_19786	AAAAAUUUCUGUUGGGUA	16	12	226.426	15.5991	33.1481	3.5145	experimental
478	he_9903	UGGGUCUUUGCGGGCGAGAUGA	16	13	495.648	39.9631	187.87	24.4445	experimental
479	xbz_9202	ACCAAUAUUACUGUGCUGCUUU	16	14	263.361	16.7831	48.8981	5.93255	experimental
480	he_27500	AUGGGUGAAUUUGUAGAAGGAU	16	15	237.546	15.5391	36.5741	4.19435	experimental
481	he_6383	AGAAAUGAUGUUAUUCUGAAA	16	16	228.333	12.0559	37.9537	2.96202	experimental
482	he_40142	ACUUCUUAGAGGGACAAGUGGCGUUC	16	17	15781.6	281.815	2537.68	111.66	experimental
483	he_8797	GUGACUGAGUCUUAAGCAAUGAUGCG	16	18	232.806	13.2971	39.3611	4.25465	experimental
484	he_43902	UGGAAAUGAUGAAAUAGAGA	16	19	216.796	14.9146	31.4815	2.81013	experimental
485	he_52106	GCCCAGCUAGCUCAGUCGGUAGAGGAUA	16	20	4911.16	163.998	880.213	56.278	experimental
486	hsa-5S-b2		16	21	35388.2	371.024	38274	215.55	control	control_biosequences	LC Internal Use
487	xbz_19786	AAAAAUUUCUGUUGGGUA	16	22	228.972	6.9045	37.9259	4.70971	experimental
488	he_9903	UGGGUCUUUGCGGGCGAGAUGA	16	23	504.981	23.7821	173.444	17.2162	experimental
489	xbz_9202	ACCAAUAUUACUGUGCUGCUUU	16	24	230.565	20.9794	40.3889	4.42979	experimental
490	he_27500	AUGGGUGAAUUUGUAGAAGGAU	16	25	231.981	13.9692	31.787	3.11778	experimental
491	he_6383	AGAAAUGAUGUUAUUCUGAAA	16	26	234.463	18.6108	29.6759	2.92213	experimental
492	he_40142	ACUUCUUAGAGGGACAAGUGGCGUUC	16	27	15449.4	213.767	2543.08	120.299	experimental
493	he_8797	GUGACUGAGUCUUAAGCAAUGAUGCG	16	28	226.528	13.6268	35.1204	3.42535	experimental
494	he_43902	UGGAAAUGAUGAAAUAGAGA	16	29	220.954	11.912	32.7407	2.68388	experimental
495	he_52106	GCCCAGCUAGCUCAGUCGGUAGAGGAUA	16	30	5364.81	162.985	999.306	50.6667	experimental
496	hsa-5S-b2		16	31	37914.9	480.771	44361.8	466.828	control	control_biosequences	LC Internal Use
497	hsa-5S-b3		17	1	24775	430.359	11310.1	209.152	control	control_biosequences	LC Internal Use
498	xbz_26370	CUGGGAGAAGGCUGUUUACU	17	2	312.62	20.8442	57.3611	8.74077	experimental
499	he_18321	UACUUGUUUUAGGAGUAUCUUAA	17	3	245.481	14.0416	31.4722	2.84312	experimental
500	xbz_3740	AGGUUGGGAUCGGUUGCAAUGCU	17	4	424.204	33.2826	41.713	5.29336	experimental
501	he_44031	CUCAAACUUGUUGGAGUAGGC	17	5	254.287	21.9613	37.037	3.61442	experimental
502	he_6833	UAAGGUGCAUCUAGUGCAGAU	17	6	418.231	51.3834	448.204	33.3073	experimental
503	he_40162	GAGAGGUGUAGAAUAAGUGGGAGGUCCCC	17	7	6811.37	210.914	1287.14	118.841	experimental
504	he_9047	CUUUAACGAAGAUCCAUUGGAGGGCA	17	8	7821.26	192.216	983.981	64.3521	experimental
505	he_29981	AAUUUUUAAUGCAGAAGUUUGAAUGAAG	17	9	240.019	23.0363	32.1204	2.68508	experimental
506	he_42318	ACUGUGUGCUGAUUGUCACGUUCUGAUU	17	10	268.333	19.3526	631.778	44.6267	experimental
507	hsa-5S-b3		17	11	23998.4	283.183	11381.1	344.126	control	control_biosequences	LC Internal Use
508	xbz_26370	CUGGGAGAAGGCUGUUUACU	17	12	285.389	22.3075	65.0185	9.07186	experimental
509	he_18321	UACUUGUUUUAGGAGUAUCUUAA	17	13	214.056	14.1671	28.7685	2.04896	experimental
510	xbz_3740	AGGUUGGGAUCGGUUGCAAUGCU	17	14	379.944	29.4158	39.7778	6.56717	experimental
511	he_44031	CUCAAACUUGUUGGAGUAGGC	17	15	230.269	13.4238	41.8519	6.56785	experimental
512	he_6833	UAAGGUGCAUCUAGUGCAGAU	17	16	435.722	36.6532	446.602	31.5061	experimental
513	he_40162	GAGAGGUGUAGAAUAAGUGGGAGGUCCCC	17	17	6436.83	129.589	1202.39	69.2481	experimental
514	he_9047	CUUUAACGAAGAUCCAUUGGAGGGCA	17	18	7210.69	147.588	831.685	58.0104	experimental
515	he_29981	AAUUUUUAAUGCAGAAGUUUGAAUGAAG	17	19	214.991	15.9412	30.9352	3.68952	experimental
516	he_42318	ACUGUGUGCUGAUUGUCACGUUCUGAUU	17	20	226.843	12.8653	595.676	33.1352	experimental
517	hsa-5S-b3		17	21	21887.6	293.966	10390.5	213.684	control	control_biosequences	LC Internal Use
518	xbz_26370	CUGGGAGAAGGCUGUUUACU	17	22	295.926	28.3848	59.4907	7.31341	experimental
519	he_18321	UACUUGUUUUAGGAGUAUCUUAA	17	23	221.546	14.3575	32.5278	2.09342	experimental
520	xbz_3740	AGGUUGGGAUCGGUUGCAAUGCU	17	24	359.519	37.6522	42.3981	6.09265	experimental
521	he_44031	CUCAAACUUGUUGGAGUAGGC	17	25	250.463	24.2755	38.3056	4.13433	experimental
522	he_6833	UAAGGUGCAUCUAGUGCAGAU	17	26	376.398	24.9152	368.815	34.173	experimental
523	he_40162	GAGAGGUGUAGAAUAAGUGGGAGGUCCCC	17	27	6282.92	242.133	1121.01	53.9133	experimental
524	he_9047	CUUUAACGAAGAUCCAUUGGAGGGCA	17	28	6982.17	176.885	827.213	61.7506	experimental
525	he_29981	AAUUUUUAAUGCAGAAGUUUGAAUGAAG	17	29	230.194	13.9682	29.1204	2.1948	experimental
526	he_42318	ACUGUGUGCUGAUUGUCACGUUCUGAUU	17	30	267.843	21.3534	665.704	49.5639	experimental
527	hsa-5S-b3		17	31	24038.3	266.174	11761.6	139.019	control	control_biosequences	LC Internal Use
528	hsa-5S-b4		18	1	13841.3	237.116	8992.47	245.341	control	control_biosequences	LC Internal Use
529	xbz_23536	UGAGGUAGUAGUUUGUACAGUU	18	2	11692.9	170.832	12036.7	307.784	experimental
530	he_25083	AGAGGUAGUAGGUUGCAUAGUU	18	3	19017.8	249.208	20382.6	549.983	experimental
531	xbz_11034	UGAGAACUGAAUUCCAUGGGUU	18	4	18920.7	318.057	20180.7	302.734	experimental
532	he_52217	CAAUUUAGUGUGUGUGAUAUU	18	5	233.602	12.7521	33.4259	3.21563	experimental
533	he_23269	UUUUUCAUUAUUGCUCCUGACC	18	6	233.833	12.7107	30.6481	3.54494	experimental
534	he_40174	CUGACGUGGAGCCAGGCGUGGAAUGCG	18	7	3376.59	178.385	759.574	64.243	experimental
535	he_9053	CUAGAGGUGAAAUUCUUGGACCGGCG	18	8	3473.03	126.656	366.889	26.7149	experimental
536	he_28411	UUAGAGAUUUUGGAGGAGUAAA	18	9	262.093	14.6227	34.6111	3.91459	experimental
537	he_36935	GGGCUGUGAUGUUUAUUAGCUUCUGAGCUC	18	10	239.046	14.4412	36.3704	4.56642	experimental
538	hsa-5S-b4		18	11	13003.4	358.522	9252.12	287.763	control	control_biosequences	LC Internal Use
539	xbz_23536	UGAGGUAGUAGUUUGUACAGUU	18	12	11023.9	164.28	11873.9	185.891	experimental
540	he_25083	AGAGGUAGUAGGUUGCAUAGUU	18	13	17790.2	223.886	19730.6	456.946	experimental
541	xbz_11034	UGAGAACUGAAUUCCAUGGGUU	18	14	17368.3	242.538	21857.8	352.44	experimental
542	he_52217	CAAUUUAGUGUGUGUGAUAUU	18	15	231.741	18.7464	35.3241	3.35954	experimental
543	he_23269	UUUUUCAUUAUUGCUCCUGACC	18	16	221.472	10.8683	40.7222	3.76117	experimental
544	he_40174	CUGACGUGGAGCCAGGCGUGGAAUGCG	18	17	3284.22	82.0711	772	42.9675	experimental
545	he_9053	CUAGAGGUGAAAUUCUUGGACCGGCG	18	18	3154.07	133.446	321.676	32.6591	experimental
546	he_28411	UUAGAGAUUUUGGAGGAGUAAA	18	19	206.176	15.3847	30.3241	2.23744	experimental
547	he_36935	GGGCUGUGAUGUUUAUUAGCUUCUGAGCUC	18	20	214.157	22.2291	34.6296	3.66492	experimental
548	hsa-5S-b4		18	21	11609.8	258.406	8466.97	195.981	control	control_biosequences	LC Internal Use
549	xbz_23536	UGAGGUAGUAGUUUGUACAGUU	18	22	10386.4	275.003	10780.8	283.802	experimental
550	he_25083	AGAGGUAGUAGGUUGCAUAGUU	18	23	16906.6	216.88	17437.2	231.603	experimental
551	xbz_11034	UGAGAACUGAAUUCCAUGGGUU	18	24	16346.5	288.726	19326.8	286.204	experimental
552	he_52217	CAAUUUAGUGUGUGUGAUAUU	18	25	217.963	16.0326	33.6389	2.83654	experimental
553	he_23269	UUUUUCAUUAUUGCUCCUGACC	18	26	217	20.5344	31.787	4.89335	experimental
554	he_40174	CUGACGUGGAGCCAGGCGUGGAAUGCG	18	27	3254.99	139.647	704.176	54.9888	experimental
555	he_9053	CUAGAGGUGAAAUUCUUGGACCGGCG	18	28	3168.97	139.254	322.926	36.4406	experimental
556	he_28411	UUAGAGAUUUUGGAGGAGUAAA	18	29	228.389	15.6706	31.8056	3.19596	experimental
557	he_36935	GGGCUGUGAUGUUUAUUAGCUUCUGAGCUC	18	30	217.694	8.46484	36.9074	3.87307	experimental
558	hsa-5S-b4		18	31	13220	272.904	9865.14	215.577	control	control_biosequences	LC Internal Use
559	hsa-5S-b5		19	1	29574.6	265.13	25864.2	467.374	control	control_biosequences	LC Internal Use
560	xbz_23920	GGUGGGAAAGCAGGACUU	19	2	274.417	21.3402	43.2963	6.00507	experimental
561	he_20271	GCGCCCAGGGCGCACCACCGGCCCG	19	3	2357.91	124.798	240.25	32.3529	experimental
562	xbz_3731	CAAAGUGCUUACAGUGCAGGUAG	19	4	6952.89	144.271	12402	199.084	experimental
563	he_49813	UAUGGCACUGGUAGAAUUCACUG	19	5	5737.44	153.872	3966.94	148.649	experimental
564	he_25080	UGAGGUAGUAGGUUGUAUAGUUUU	19	6	20345.5	371.965	21975.6	692.356	experimental
565	he_40343	AAGCAUUGGUGGUUCAGUGGUAGAAUUC	19	7	46386.8	679.63	14258.1	364.618	experimental
566	he_9090	AGGUGGAGCACCAGGGCACGUGUUAG	19	8	1394.07	79.6639	225.287	32.3165	experimental
567	he_48746	GUUGUCUGCUAGAUCAUGGUUUG	19	9	233.815	17.1721	33.9167	2.85187	experimental
568	he_32697	UUUUUGGCCAAGGGUAUCUUAAACAA	19	10	249.028	11.9645	35.6296	3.49256	experimental
569	hsa-5S-b5		19	11	29089.4	300.563	24969.4	300.082	control	control_biosequences	LC Internal Use
570	xbz_23920	GGUGGGAAAGCAGGACUU	19	12	244.259	13.0523	43.7407	6.09944	experimental
571	he_20271	GCGCCCAGGGCGCACCACCGGCCCG	19	13	2184.56	110.409	202.917	15.8498	experimental
572	xbz_3731	CAAAGUGCUUACAGUGCAGGUAG	19	14	6424.56	187.045	13097	333.142	experimental
573	he_49813	UAUGGCACUGGUAGAAUUCACUG	19	15	5326.8	204.784	4352.8	189.071	experimental
574	he_25080	UGAGGUAGUAGGUUGUAUAGUUUU	19	16	19453.2	271.822	21519.4	433.078	experimental
575	he_40343	AAGCAUUGGUGGUUCAGUGGUAGAAUUC	19	17	44182.5	422.778	12564.5	193.473	experimental
576	he_9090	AGGUGGAGCACCAGGGCACGUGUUAG	19	18	1298.18	56.0545	197.574	22.8642	experimental
577	he_48746	GUUGUCUGCUAGAUCAUGGUUUG	19	19	219.278	20.0191	32.3796	2.9788	experimental
578	he_32697	UUUUUGGCCAAGGGUAUCUUAAACAA	19	20	208.241	8.7198	31.7407	3.64646	experimental
579	hsa-5S-b5		19	21	26753.4	274.887	24062.1	268.181	control	control_biosequences	LC Internal Use
580	xbz_23920	GGUGGGAAAGCAGGACUU	19	22	228.111	13.3089	41.2593	5.26027	experimental
581	he_20271	GCGCCCAGGGCGCACCACCGGCCCG	19	23	2154.67	142.526	224.444	17.4781	experimental
582	xbz_3731	CAAAGUGCUUACAGUGCAGGUAG	19	24	6043.55	163.5	11401.4	198.226	experimental
583	he_49813	UAUGGCACUGGUAGAAUUCACUG	19	25	4870.28	197.224	3833.14	121.319	experimental
584	he_25080	UGAGGUAGUAGGUUGUAUAGUUUU	19	26	18351.8	309.763	19498.5	480.466	experimental
585	he_40343	AAGCAUUGGUGGUUCAGUGGUAGAAUUC	19	27	42089.5	327.342	11861.2	191.375	experimental
586	he_9090	AGGUGGAGCACCAGGGCACGUGUUAG	19	28	1320.05	74.5265	193.62	18.7196	experimental
587	he_48746	GUUGUCUGCUAGAUCAUGGUUUG	19	29	239.194	16.6006	31.3981	2.63314	experimental
588	he_32697	UUUUUGGCCAAGGGUAUCUUAAACAA	19	30	232.389	15.9742	33.0741	3.2889	experimental
589	hsa-5S-b5		19	31	29254.9	357.716	27551.8	445.209	control	control_biosequences	LC Internal Use
590	hsa-5S-b6		20	1	43929.8	390.294	34386.6	774.671	control	control_biosequences	LC Internal Use
591	xbz_20219	GUUUCUCAUAUCAUUGGUCGUGG	20	2	313.083	22.9978	35.4815	2.61012	experimental
592	he_2066	CAUAACUUGACCUCUCUGACUA	20	3	528.231	38.9669	43.7407	3.71753	experimental
593	xbz_13910	ACCACUGACCGUUGACUGUAC	20	4	471.222	44.4655	147.713	19.5089	experimental
594	he_30405	CUGUGCGUGUGACAGCGGCUGA	20	5	587.667	40.3638	771.028	44.0054	experimental
595	he_12204	UGAGGUAGGAGGUUGUAUAGUU	20	6	12895.5	400.255	10151.9	541.023	experimental
596	he_40709	GGGGGUAUAGCUUAGUGGUAGAGUAUUUG	20	7	5672.11	310.142	371.111	42.4256	experimental
597	he_9463	AUCGCUGUACGGCCUUGAUGAAAGCA	20	8	615.972	42.8705	5389.02	188.159	experimental
598	he_39410	UGAUUUGUCUGGAGGAAUGAUU	20	9	250.139	13.8196	36.4352	4.60043	experimental
599	he_51658	AUUGGUACUGAAAAGAGACGUAGUAAAU	20	10	240.028	11.977	35.0463	4.00323	experimental
600	hsa-5S-b6		20	11	42771.7	435.605	32775.3	880.952	control	control_biosequences	LC Internal Use
601	xbz_20219	GUUUCUCAUAUCAUUGGUCGUGG	20	12	312.806	32.513	33.787	4.43236	experimental
602	he_2066	CAUAACUUGACCUCUCUGACUA	20	13	480.657	58.4603	41.287	7.14738	experimental
603	xbz_13910	ACCACUGACCGUUGACUGUAC	20	14	422.269	36.426	146.296	11.1433	experimental
604	he_30405	CUGUGCGUGUGACAGCGGCUGA	20	15	570.676	27.7188	728.87	38.3494	experimental
605	he_12204	UGAGGUAGGAGGUUGUAUAGUU	20	16	12398.4	338.268	10317.7	315.989	experimental
606	he_40709	GGGGGUAUAGCUUAGUGGUAGAGUAUUUG	20	17	5072.59	425.599	353.769	53.825	experimental
607	he_9463	AUCGCUGUACGGCCUUGAUGAAAGCA	20	18	563.167	52.7853	4898.84	154.047	experimental
608	he_39410	UGAUUUGUCUGGAGGAAUGAUU	20	19	214.574	13.5358	32.3889	3.3762	experimental
609	he_51658	AUUGGUACUGAAAAGAGACGUAGUAAAU	20	20	201.398	15.2174	32.0093	2.78009	experimental
610	hsa-5S-b6		20	21	38696.4	485.2	31330.9	347.262	control	control_biosequences	LC Internal Use
611	xbz_20219	GUUUCUCAUAUCAUUGGUCGUGG	20	22	305.639	30.6083	36.3704	2.97212	experimental
612	he_2066	CAUAACUUGACCUCUCUGACUA	20	23	507.556	28.0248	45.0741	7.07992	experimental
613	xbz_13910	ACCACUGACCGUUGACUGUAC	20	24	415.287	23.0627	143.519	14.59	experimental
614	he_30405	CUGUGCGUGUGACAGCGGCUGA	20	25	552.769	47.6368	709.009	42.8378	experimental
615	he_12204	UGAGGUAGGAGGUUGUAUAGUU	20	26	11603.1	462.734	9521.76	452.637	experimental
616	he_40709	GGGGGUAUAGCUUAGUGGUAGAGUAUUUG	20	27	5484.98	217.061	375.602	41.8841	experimental
617	he_9463	AUCGCUGUACGGCCUUGAUGAAAGCA	20	28	571.519	37.1671	4832.19	114.414	experimental
618	he_39410	UGAUUUGUCUGGAGGAAUGAUU	20	29	223.278	10.8901	30.9722	2.41668	experimental
619	he_51658	AUUGGUACUGAAAAGAGACGUAGUAAAU	20	30	229.87	11.6812	31.6852	3.62919	experimental
620	hsa-5S-b6		20	31	42439.3	372.875	35496.1	448.126	control	control_biosequences	LC Internal Use
621	TU4	UCUGACAAAUGAACAAGUCAUUCUAUUUACUG	21	1	232.63	13.8386	33.3611	2.91454	experimental
622	xbz_27158	UAAGAUGGUAGCCAUCAUUA	21	2	251.398	10.7033	35.0648	3.53163	experimental
623	he_5727	UGAGGUAGUAGUUUGUGCUGUU	21	3	13726.3	117.731	17797.5	405.326	experimental
624	xbz_11720	AGCAGAGUAGAGCAGUUGGAAGA	21	4	338.657	24.0036	49.3889	5.29474	experimental
625	he_28827	UAGCACCAUUUGAAAUCAGUGUUU	21	5	1049.33	92.5524	9539.4	211.669	experimental
626	he_26153	UGUCAGUUUGUCAAAUACCCCA	21	6	242.926	14.5092	29.8611	4.92079	experimental
627	he_40719	CAAUGGUGGUUCAGUGGUAGAAUUCUC	21	7	44494	561.495	13408.3	347.775	experimental
628	he_9626	CCAUAUGAUGUGACCUUACUCAACUGAUU	21	8	241.843	17.2563	68.4722	10.5675	experimental
629	he_46082	UUACAGUUGUUCAACCAGUUACU	21	9	240.981	16.4009	35.4352	5.67874	experimental
630	he_37784	AAACAGUUGUAAAAUAAUGAAGGUAG	21	10	237.241	14.9772	32.537	4.17922	experimental
631	TU4	UCUGACAAAUGAACAAGUCAUUCUAUUUACUG	21	11	216.787	14.2166	31.7593	2.32367	experimental
632	xbz_27158	UAAGAUGGUAGCCAUCAUUA	21	12	230.12	13.6893	32.6944	3.43554	experimental
633	he_5727	UGAGGUAGUAGUUUGUGCUGUU	21	13	13096.3	271.842	16984.9	262.264	experimental
634	xbz_11720	AGCAGAGUAGAGCAGUUGGAAGA	21	14	308.065	31.7282	58.1759	7.70705	experimental
635	he_28827	UAGCACCAUUUGAAAUCAGUGUUU	21	15	984.713	68.5146	9845.61	332.816	experimental
636	he_26153	UGUCAGUUUGUCAAAUACCCCA	21	16	232.481	11.1141	36.7778	3.13954	experimental
637	he_40719	CAAUGGUGGUUCAGUGGUAGAAUUCUC	21	17	42750.3	420.876	11823.4	258.268	experimental
638	he_9626	CCAUAUGAUGUGACCUUACUCAACUGAUU	21	18	228.583	13.5088	64.463	4.04513	experimental
639	he_46082	UUACAGUUGUUCAACCAGUUACU	21	19	203.074	15.7407	31.8889	3.59474	experimental
640	he_37784	AAACAGUUGUAAAAUAAUGAAGGUAG	21	20	199.472	17.2965	30.6204	3.36757	experimental
641	rt_chr1_C_1	AUUUAGGAUCCAAACCCAGGUUGUCAUGGCGG	21	21	360.194	22.191	45.25	4.17855	experimental
642	xbz_27158	UAAGAUGGUAGCCAUCAUUA	21	22	223.611	18.4972	34.3611	2.65618	experimental
643	he_5727	UGAGGUAGUAGUUUGUGCUGUU	21	23	12505	247.026	15059.2	226.128	experimental
644	xbz_11720	AGCAGAGUAGAGCAGUUGGAAGA	21	24	299.019	33.0505	52.963	6.79324	experimental
645	he_28827	UAGCACCAUUUGAAAUCAGUGUUU	21	25	967.491	69.1436	9233.68	190.224	experimental
646	he_26153	UGUCAGUUUGUCAAAUACCCCA	21	26	211.38	12.8199	32.5556	3.7124	experimental
647	he_40719	CAAUGGUGGUUCAGUGGUAGAAUUCUC	21	27	40969.9	638.58	11314.8	192.636	experimental
648	he_9626	CCAUAUGAUGUGACCUUACUCAACUGAUU	21	28	222.935	20.9692	56.713	8.14363	experimental
649	he_46082	UUACAGUUGUUCAACCAGUUACU	21	29	230.565	14.1344	35.2222	3.96794	experimental
650	he_37784	AAACAGUUGUAAAAUAAUGAAGGUAG	21	30	223.306	13.9347	29.5463	3.59487	experimental
651	TU4	UCUGACAAAUGAACAAGUCAUUCUAUUUACUG	21	31	205.259	10.3096	29.9352	4.97334	experimental
652	TU531	UUUGAAUAUCUUUCUAAAUUUUAUCUGCUACA	22	1	227.528	13.3392	29.1574	2.96762	experimental
653	xbz_26095	GUUUCCGUAGUGUAGUGGUUAUU	22	2	6397.97	184.491	137.102	15.9338	experimental
654	he_21987	AGGUUAAUCAUGAACUUGAA	22	3	243.009	13.9596	32.0463	2.95886	experimental
655	xbz_11338	UUCAAAGGUGAACGUUUU	22	4	262.278	19.5806	34.5185	4.52714	experimental
656	he_53516	CAGCAGCAAUUCAUGUUUUGA	22	5	251.731	16.8621	52.5833	9.87977	experimental
657	he_10364	CAACACCAGUCGAUGGGCUGUC	22	6	295.444	20.6444	100.278	22.3861	experimental
658	he_40953	GGUCAGUCGGUCCUGAGAGAUGGGCGAG	22	7	11588.2	271.467	2262.34	139.037	experimental
659	he_9627	UGGAAAGGAUGAAGAGCUGACUGAUGG	22	8	266.556	14.1046	48.5	4.04992	experimental
660	he_27299	GAGGCCUCUUAUUUCCUGAGGCUA	22	9	240.602	13.508	35.213	2.90359	experimental
661	he_41230	UAACAUGGACUGGGAUAGAUUAAAGGCA	22	10	245.602	15.0438	34.9722	3.52417	experimental
662	TU531	UUUGAAUAUCUUUCUAAAUUUUAUCUGCUACA	22	11	213.796	10.9124	27.3241	2.39091	experimental
663	xbz_26095	GUUUCCGUAGUGUAGUGGUUAUU	22	12	5714.56	241.259	129.843	16.7439	experimental
664	he_21987	AGGUUAAUCAUGAACUUGAA	22	13	212	12.0946	28.3611	2.57398	experimental
665	xbz_11338	UUCAAAGGUGAACGUUUU	22	14	228.074	13.3485	32.8519	4.87951	experimental
666	he_53516	CAGCAGCAAUUCAUGUUUUGA	22	15	220.407	17.4388	53.3333	6.97794	experimental
667	he_10364	CAACACCAGUCGAUGGGCUGUC	22	16	293.593	19.3521	120.556	15.9387	experimental
668	he_40953	GGUCAGUCGGUCCUGAGAGAUGGGCGAG	22	17	11168.4	209.101	2196.79	80.2432	experimental
669	he_9627	UGGAAAGGAUGAAGAGCUGACUGAUGG	22	18	227.62	11.2314	46.0648	4.60855	experimental
670	he_27299	GAGGCCUCUUAUUUCCUGAGGCUA	22	19	208.287	13.6854	33.213	4.40486	experimental
671	he_41230	UAACAUGGACUGGGAUAGAUUAAAGGCA	22	20	204.444	12.5112	34.3333	4.67045	experimental
672	rt_chr13_E_2_host	CACCUCAGCCUCCUAAAAUGCUGGGAUUACAG	22	21	219.63	17.3181	31.9815	2.39931	experimental
673	xbz_26095	GUUUCCGUAGUGUAGUGGUUAUU	22	22	5639.76	199.443	119.593	18.6993	experimental
674	he_21987	AGGUUAAUCAUGAACUUGAA	22	23	222.972	14.7353	32.0093	2.86616	experimental
675	xbz_11338	UUCAAAGGUGAACGUUUU	22	24	208.296	7.33097	30.1667	3.47084	experimental
676	he_53516	CAGCAGCAAUUCAUGUUUUGA	22	25	222.083	13.7936	57.1389	12.5776	experimental
677	he_10364	CAACACCAGUCGAUGGGCUGUC	22	26	251.046	18.5656	90.4444	17.4197	experimental
678	he_40953	GGUCAGUCGGUCCUGAGAGAUGGGCGAG	22	27	10573.3	229.071	2023.04	54.2192	experimental
679	he_9627	UGGAAAGGAUGAAGAGCUGACUGAUGG	22	28	234.148	16.2388	49.9167	10.3103	experimental
680	he_27299	GAGGCCUCUUAUUUCCUGAGGCUA	22	29	223.009	10.0564	37.4074	4.84341	experimental
681	he_41230	UAACAUGGACUGGGAUAGAUUAAAGGCA	22	30	226.593	10.6675	32.9167	2.5325	experimental
682	TU531	UUUGAAUAUCUUUCUAAAUUUUAUCUGCUACA	22	31	206.806	9.85641	27.0093	3.42475	experimental
683	TU540	AAGAACUAGUAAAUCCUAAGAGAGAAUUAGGA	23	1	235.796	9.59727	29.7037	3.50503	experimental
684	xbz_27866	AACGGGCUUGGCGGAA	23	2	11269.1	283.956	1393.01	96.1056	experimental
685	he_14423	AGCAGCAUUGUACAGGGCUAUGAAA	23	3	6267.53	173.196	13931	442.663	experimental
686	xbz_13753	UGAGGUAGUAGGUUGUAUAGUUUU	23	4	20506.4	459.418	20220.4	178.893	experimental
687	he_33255	AGCUGUUGUGAGUCAGGCCG	23	5	261.62	23.2663	42.0093	5.55263	experimental
688	he_12052	CUGGGAUCUCCGGGGUCUUGGUU	23	6	249.241	16.6357	36.3148	5.26787	experimental
689	he_40976	UGGAUAUGAUGACUGAUUACCUGAGA	23	7	235.824	12.6335	143.176	27.3721	experimental
690	he_9634	UCCAGGGUUCAAGUCCCUGUUCGGGCGGCA	23	8	26508.4	435.019	5724.42	153.651	experimental
691	he_28961	GGUUCCAUUGUGUAAUGGUUGGCACUCUGG	23	9	4648.9	198.61	461.954	33.3151	experimental
692	he_27778	AAGACCCUGGAGUUCAAAAAACUCUUG	23	10	238.12	13.3604	34.963	2.92883	experimental
693	TU540	AAGAACUAGUAAAUCCUAAGAGAGAAUUAGGA	23	11	225.5	13.1345	29.3519	3.10957	experimental
694	xbz_27866	AACGGGCUUGGCGGAA	23	12	10444.9	243.6	1359.67	75.7032	experimental
695	he_14423	AGCAGCAUUGUACAGGGCUAUGAAA	23	13	5778.32	236.801	13363	276.693	experimental
696	xbz_13753	UGAGGUAGUAGGUUGUAUAGUUUU	23	14	19221.6	292.728	22176.5	298.383	experimental
697	he_33255	AGCUGUUGUGAGUCAGGCCG	23	15	229.991	12.0097	41.2778	3.30628	experimental
698	he_12052	CUGGGAUCUCCGGGGUCUUGGUU	23	16	256.287	15.4708	47.7315	5.0393	experimental
699	he_40976	UGGAUAUGAUGACUGAUUACCUGAGA	23	17	258.185	20.4108	148.852	15.2755	experimental
700	he_9634	UCCAGGGUUCAAGUCCCUGUUCGGGCGGCA	23	18	23708.8	323.256	5197.3	163.889	experimental
701	he_28961	GGUUCCAUUGUGUAAUGGUUGGCACUCUGG	23	19	3989.23	165.302	438.63	45.6454	experimental
702	he_27778	AAGACCCUGGAGUUCAAAAAACUCUUG	23	20	202.056	18.7924	31.7037	3.01169	experimental
703	rt_chr3_A_2	UCCUCACUUAAAAUCUUUGGUCCAUAAUAAAU	23	21	191.731	10.6276	28.7778	2.21014	experimental
704	xbz_27866	AACGGGCUUGGCGGAA	23	22	9755.56	269.238	1297.01	79.6534	experimental
705	he_14423	AGCAGCAUUGUACAGGGCUAUGAAA	23	23	5460.86	133.613	11677.9	119.708	experimental
706	xbz_13753	UGAGGUAGUAGGUUGUAUAGUUUU	23	24	18251.1	344.513	19539.4	418.936	experimental
707	he_33255	AGCUGUUGUGAGUCAGGCCG	23	25	235.389	17.3495	41.75	4.11999	experimental
708	he_12052	CUGGGAUCUCCGGGGUCUUGGUU	23	26	219.907	11.3776	35.463	4.58038	experimental
709	he_40976	UGGAUAUGAUGACUGAUUACCUGAGA	23	27	258.444	32.1109	147.463	16.9642	experimental
710	he_9634	UCCAGGGUUCAAGUCCCUGUUCGGGCGGCA	23	28	23870.4	355.132	5130.52	124.325	experimental
711	he_28961	GGUUCCAUUGUGUAAUGGUUGGCACUCUGG	23	29	4504.92	163.108	483.019	37.9587	experimental
712	he_27778	AAGACCCUGGAGUUCAAAAAACUCUUG	23	30	224.954	10.9497	30.25	2.76873	experimental
713	TU540	AAGAACUAGUAAAUCCUAAGAGAGAAUUAGGA	23	31	219.296	20.0389	27.1389	3.09494	experimental
714	TU541	CAAGGACUUAUUUAAAAGUGUUUUCAAGUCUG	24	1	237.074	16.6468	30.1019	2.35193	experimental
715	xbz_19551	UCAAGUGAAUGAUCAGCUU	24	2	243.972	14.4264	30.0741	3.99463	experimental
716	he_14422	AGCUUCUUUACAGUGCUGCCUUGU	24	3	321.88	16.5861	182.741	22.0163	experimental
717	xbz_1241	AUCCUGCUCACAGCGCCA	24	4	1152.23	71.3067	183.037	25.8345	experimental
718	he_51982	CAACAAAUCACAGUCUGCCAUA	24	5	354.963	27.7882	90.9444	21.2034	experimental
719	he_9307	UACCACAGGGUAGAACCACGGAC	24	6	703.852	51.4007	626.565	44.984	experimental
720	he_41259	ACAACCCCCACUGCUAAAUUUGACUGG	24	7	22542.2	366.02	520.62	42.4063	experimental
721	he_9638	GCUAAGGAAGUCCUGUGCUCAGUUUU	24	8	526.352	49.1152	47.3611	6.13472	experimental
722	he_52487	UGGACUUCUAGCUGAGCCUAGUGUGGUC	24	9	349.509	24.2308	38.8611	2.8823	experimental
723	he_24730	AGGCAUUUGAAGGUGGAGAAGCUGGC	24	10	291.565	18.0877	45.3981	4.75756	experimental
724	TU541	CAAGGACUUAUUUAAAAGUGUUUUCAAGUCUG	24	11	224.556	7.70645	30.2685	1.90722	experimental
725	xbz_19551	UCAAGUGAAUGAUCAGCUU	24	12	230.769	14.0982	30.6296	2.65665	experimental
726	he_14422	AGCUUCUUUACAGUGCUGCCUUGU	24	13	280.62	31.7642	154.093	17.2911	experimental
727	xbz_1241	AUCCUGCUCACAGCGCCA	24	14	1047.82	40.6165	166.056	27.1747	experimental
728	he_51982	CAACAAAUCACAGUCUGCCAUA	24	15	303.231	25.4366	93.8611	15.5049	experimental
729	he_9307	UACCACAGGGUAGAACCACGGAC	24	16	666.639	46.7378	698.083	56.3267	experimental
730	he_41259	ACAACCCCCACUGCUAAAUUUGACUGG	24	17	21320.2	355.076	511.87	30.9845	experimental
731	he_9638	GCUAAGGAAGUCCUGUGCUCAGUUUU	24	18	525.593	40.3825	51.0463	6.96907	experimental
732	he_52487	UGGACUUCUAGCUGAGCCUAGUGUGGUC	24	19	296.222	21.4225	38.1759	4.26424	experimental
733	he_24730	AGGCAUUUGAAGGUGGAGAAGCUGGC	24	20	248.25	18.4574	42.2963	4.01925	experimental
734	chr11_A_6	UCUCAUUUUUCCUCUCUCAGUAUGUGGUACUA	24	21	188.333	8.79996	29.3148	2.92794	experimental
735	xbz_19551	UCAAGUGAAUGAUCAGCUU	24	22	237.611	16.2209	34.5	4.61914	experimental
736	he_14422	AGCUUCUUUACAGUGCUGCCUUGU	24	23	268.611	17.2415	148.194	19.7444	experimental
737	xbz_1241	AUCCUGCUCACAGCGCCA	24	24	1075.22	60.6308	158.472	16.5769	experimental
738	he_51982	CAACAAAUCACAGUCUGCCAUA	24	25	319.481	24.712	88.3889	12.1861	experimental
739	he_9307	UACCACAGGGUAGAACCACGGAC	24	26	630.139	48.7474	568.639	48.1975	experimental
740	he_41259	ACAACCCCCACUGCUAAAUUUGACUGG	24	27	20399.4	212.575	485.907	29.1434	experimental
741	he_9638	GCUAAGGAAGUCCUGUGCUCAGUUUU	24	28	509.972	37.4452	49.963	7.59479	experimental
742	he_52487	UGGACUUCUAGCUGAGCCUAGUGUGGUC	24	29	323.204	15.787	37.5185	2.82009	experimental
743	he_24730	AGGCAUUUGAAGGUGGAGAAGCUGGC	24	30	279.935	14.9349	46.3056	4.95486	experimental
744	TU541	CAAGGACUUAUUUAAAAGUGUUUUCAAGUCUG	24	31	220.769	10.4063	27.3796	2.3669	experimental
745	TU556	CACGACAGUAAACGAUGUGGUACAAAAGCACU	25	1	232.426	16.3451	31.6296	3.67002	experimental
746	xbz_24742	AAAGGAAGAAAAGCAAUGCAUGU	25	2	248.648	15.6009	34.9167	3.64326	experimental
747	he_6004	UGAGGUAGUUGUUGUCUAGUU	25	3	240.491	13.8372	31.3426	2.71432	experimental
748	xbz_12465	AAGGAAAUUGUUUAGAU	25	4	234.556	11.9542	31.9352	3.57895	experimental
749	he_28710	CUCACUGAACAAUGAAUGCAA	25	5	261.833	16.4433	33.6019	3.3263	experimental
750	he_6014	UGGUUUUGUUUGGGUUUGUU	25	6	232.963	8.29922	31.2037	2.81438	experimental
751	he_41264	CACAAAGAUGAGUGGUGAAAAUCUGAUC	25	7	253.639	21.8788	673.38	55.2807	experimental
752	he_9646	GCGUUGGUGGUAUAGUGGUAAGCAUAGCU	25	8	24016.9	557.087	2787.19	105.125	experimental
753	he_31221	UCUACAGUGCACGUGUCUCCAGU	25	9	290.917	19.6764	53.4167	4.83199	experimental
754	he_26104	GGGGCUGGCUUUAGCUCAGCGGUUACUUCG	25	10	3538.99	120.032	502.75	27.3154	experimental
755	TU556	CACGACAGUAAACGAUGUGGUACAAAAGCACU	25	11	224.806	12.2516	29.9167	2.09193	experimental
756	xbz_24742	AAAGGAAGAAAAGCAAUGCAUGU	25	12	231.556	13.4535	34.0093	2.25685	experimental
757	he_6004	UGAGGUAGUUGUUGUCUAGUU	25	13	213.852	13.6736	31.4167	3.32682	experimental
758	xbz_12465	AAGGAAAUUGUUUAGAU	25	14	217.565	13.7944	31.9907	3.46274	experimental
759	he_28710	CUCACUGAACAAUGAAUGCAA	25	15	220.889	15.6488	32.9352	2.80944	experimental
760	he_6014	UGGUUUUGUUUGGGUUUGUU	25	16	223.537	11.1359	35.287	2.86797	experimental
761	he_41264	CACAAAGAUGAGUGGUGAAAAUCUGAUC	25	17	253.491	8.84075	609.167	32.6881	experimental
762	he_9646	GCGUUGGUGGUAUAGUGGUAAGCAUAGCU	25	18	26101.4	404.66	3441.62	98.8941	experimental
763	he_31221	UCUACAGUGCACGUGUCUCCAGU	25	19	250.361	16.6854	50.4722	7.84483	experimental
764	he_26104	GGGGCUGGCUUUAGCUCAGCGGUUACUUCG	25	20	3105.57	116.899	496.676	46.3437	experimental
765	chr8_B_5	AAUAGCCCCCUCACCUUUAUCAUCUUUUAAAA	25	21	229.222	11.3799	31.0556	3.45555	experimental
766	xbz_24742	AAAGGAAGAAAAGCAAUGCAUGU	25	22	224.694	11.212	34.5185	4.22383	experimental
767	he_6004	UGAGGUAGUUGUUGUCUAGUU	25	23	216.556	10.9043	30.5278	2.06646	experimental
768	xbz_12465	AAGGAAAUUGUUUAGAU	25	24	210.778	12.8356	30.8426	2.22207	experimental
769	he_28710	CUCACUGAACAAUGAAUGCAA	25	25	229.12	19.0345	33.5093	1.53766	experimental
770	he_6014	UGGUUUUGUUUGGGUUUGUU	25	26	203.259	13.7551	28.3241	4.29699	experimental
771	he_41264	CACAAAGAUGAGUGGUGAAAAUCUGAUC	25	27	240.639	17.0658	571.639	42.5585	experimental
772	he_9646	GCGUUGGUGGUAUAGUGGUAAGCAUAGCU	25	28	25943.3	361.602	3450.81	102.452	experimental
773	he_31221	UCUACAGUGCACGUGUCUCCAGU	25	29	275	29.9005	52.1019	6.87395	experimental
774	he_26104	GGGGCUGGCUUUAGCUCAGCGGUUACUUCG	25	30	3279.79	117.105	540.63	34.2655	experimental
775	TU556	CACGACAGUAAACGAUGUGGUACAAAAGCACU	25	31	214.463	12.1305	29.7222	2.682	experimental
776	TU558	GAAAUACCAAAUAAAAUAGAUUAUCUUAAAAG	26	1	228.065	10.8647	26.713	1.71879	experimental
777	xbz_16624	ACUCGGCGUGGCGUCGGUCGUGG	26	2	957.898	69.25	212.991	21.53	experimental
778	he_9859	UGAGGGGCAGAGAGCGAGACUUU	26	3	2629.7	135.588	980.389	80.3588	experimental
779	xbz_12959	CCACCCCACGUCUCCUCUCG	26	4	343.722	23.4161	47.0741	6.63565	experimental
780	he_42327	GUUUGAUUGCUGUCGGAGCCA	26	5	257.25	14.1297	34.463	2.9716	experimental
781	he_532	CUUUCAGUCGGAUGUUUACAGC	26	6	490.241	35.0924	129.759	17.5429	experimental
782	he_41333	CUCCCGGAGCGGGACCGGGUCGGAGGAU	26	7	8667.15	139.933	209.056	24.9833	experimental
783	he_9721	AUAACUGACGAAGACUACUCCUGUCUGAU	26	8	455.472	41.9832	4948.43	192.812	experimental
784	he_28948	ACUGGCUAGGGAAAAUGAUUGG	26	9	313.046	35.4679	53.7593	5.90876	experimental
785	he_2031	CCUCCCACUGCUAAAUUUGACUGGCUA	26	10	23173.5	334.819	506.556	22.8122	experimental
786	TU558	GAAAUACCAAAUAAAAUAGAUUAUCUUAAAAG	26	11	211.759	6.24555	26.8981	1.2451	experimental
787	xbz_16624	ACUCGGCGUGGCGUCGGUCGUGG	26	12	991.759	74.4229	236.657	34.5676	experimental
788	he_9859	UGAGGGGCAGAGAGCGAGACUUU	26	13	2442.87	103.703	921.056	74.7984	experimental
789	xbz_12959	CCACCCCACGUCUCCUCUCG	26	14	293.37	23.1987	37.0833	3.73197	experimental
790	he_42327	GUUUGAUUGCUGUCGGAGCCA	26	15	238.083	17.4844	36.5185	5.17991	experimental
791	he_532	CUUUCAGUCGGAUGUUUACAGC	26	16	473.204	33.868	146.741	10.8519	experimental
792	he_41333	CUCCCGGAGCGGGACCGGGUCGGAGGAU	26	17	8260.48	247.452	244.139	27.4388	experimental
793	he_9721	AUAACUGACGAAGACUACUCCUGUCUGAU	26	18	414.556	21.8762	4510.12	131.166	experimental
794	he_28948	ACUGGCUAGGGAAAAUGAUUGG	26	19	244.065	18.1856	45.6204	4.41052	experimental
795	he_2031	CCUCCCACUGCUAAAUUUGACUGGCUA	26	20	20719.9	452.883	487.269	50.6337	experimental
796	chr12_D_5	UUUUAUGGUAUUUUGCUGAGAGCAGUGAACAA	26	21	189.657	13.0943	28.9352	2.55143	experimental
797	xbz_16624	ACUCGGCGUGGCGUCGGUCGUGG	26	22	901	64.0934	182.907	22.0108	experimental
798	he_9859	UGAGGGGCAGAGAGCGAGACUUU	26	23	2440.41	104.032	882.37	41.561	experimental
799	xbz_12959	CCACCCCACGUCUCCUCUCG	26	24	317.676	13.0605	41.4907	3.81707	experimental
800	he_42327	GUUUGAUUGCUGUCGGAGCCA	26	25	231.778	15.0105	40.3889	2.58621	experimental
801	he_532	CUUUCAGUCGGAUGUUUACAGC	26	26	454.546	33.4687	132.037	25.5774	experimental
802	he_41333	CUCCCGGAGCGGGACCGGGUCGGAGGAU	26	27	7900.53	237.432	201.037	31.2927	experimental
803	he_9721	AUAACUGACGAAGACUACUCCUGUCUGAU	26	28	434.657	29.4489	4567.9	126.085	experimental
804	he_28948	ACUGGCUAGGGAAAAUGAUUGG	26	29	283.185	25.8913	55.0556	5.56832	experimental
805	he_2031	CCUCCCACUGCUAAAUUUGACUGGCUA	26	30	22327.8	380.308	546.954	39.9004	experimental
806	TU558	GAAAUACCAAAUAAAAUAGAUUAUCUUAAAAG	26	31	209.907	7.08234	26.8704	2.22598	experimental
807	TU583	UCCUUACCACACCGUGGACGAGAUCAACCUUA	27	1	233.213	14.4991	31.7037	2.64843	experimental
808	xbz_25639	UUAGACGGGCUCACAA	27	2	9269.53	287.162	712.343	38.78	experimental
809	he_9860	AGCUCGGUCUGAGGCCCCUCAGU	27	3	1242.19	148.692	897.407	53.6142	experimental
810	xbz_3737	UAAAGUGCUUAUAGUGCAGGUAG	27	4	6604.06	242.18	10684.9	280.931	experimental
811	he_51342	UGUAAACAUCCUACACUCAGCU	27	5	9907.05	276.303	12915	392.245	experimental
812	he_15398	CAGUGCAAUGAUGAAAGGGCAU	27	6	554.398	40.9182	536.611	73.158	experimental
813	he_41343	GAGACGAGACGCGCCCCUCCCACGCGG	27	7	312.037	21.7754	45.1019	14.1361	experimental
814	he_9772	CAGUUGAACAUGGGUCAGUCGGUCCU	27	8	10194.7	221.814	2858.49	91.9687	experimental
815	he_32438	UCGUCAUGAGACAGUUCGGUC	27	9	248.815	19.4538	38.8796	3.79798	experimental
816	he_16903	CAAGAAGAUGAUAGAGGGUUUCUGAUU	27	10	246.5	17.0401	33.8611	3.64412	experimental
817	TU583	UCCUUACCACACCGUGGACGAGAUCAACCUUA	27	11	235.481	13.439	31.3426	2.35282	experimental
818	xbz_25639	UUAGACGGGCUCACAA	27	12	8473.37	230.04	761.769	63.1455	experimental
819	he_9860	AGCUCGGUCUGAGGCCCCUCAGU	27	13	921.602	138.405	717.12	53.1462	experimental
820	xbz_3737	UAAAGUGCUUAUAGUGCAGGUAG	27	14	5846.07	102.404	11006.2	237.075	experimental
821	he_51342	UGUAAACAUCCUACACUCAGCU	27	15	9079.02	234.226	14097	321.084	experimental
822	he_15398	CAGUGCAAUGAUGAAAGGGCAU	27	16	529.667	30.0778	563.074	37.6831	experimental
823	he_41343	GAGACGAGACGCGCCCCUCCCACGCGG	27	17	290.185	18.802	50.1296	9.4948	experimental
824	he_9772	CAGUUGAACAUGGGUCAGUCGGUCCU	27	18	9288.87	137.091	2775.87	97.0469	experimental
825	he_32438	UCGUCAUGAGACAGUUCGGUC	27	19	221.704	13.3509	35.213	5.42244	experimental
826	he_16903	CAAGAAGAUGAUAGAGGGUUUCUGAUU	27	20	211.861	12.4017	32.1019	2.27928	experimental
827	rt_chr1_C_1_host	UUCCAGUAUUUCAAUUGGUCUCCUCCCCUCAU	27	21	223.463	13.8337	34.6296	3.61097	experimental
828	xbz_25639	UUAGACGGGCUCACAA	27	22	8077.66	259.474	668.481	46.969	experimental
829	he_9860	AGCUCGGUCUGAGGCCCCUCAGU	27	23	903.093	51.518	701.62	46.6806	experimental
830	xbz_3737	UAAAGUGCUUAUAGUGCAGGUAG	27	24	5845.96	117.403	9870.5	164.142	experimental
831	he_51342	UGUAAACAUCCUACACUCAGCU	27	25	8631.84	212.065	12618.8	304.319	experimental
832	he_15398	CAGUGCAAUGAUGAAAGGGCAU	27	26	499.806	43.7199	493.667	25.8602	experimental
833	he_41343	GAGACGAGACGCGCCCCUCCCACGCGG	27	27	271.787	19.5597	46.5	6.27486	experimental
834	he_9772	CAGUUGAACAUGGGUCAGUCGGUCCU	27	28	9147.29	200.028	2653.61	75.4618	experimental
835	he_32438	UCGUCAUGAGACAGUUCGGUC	27	29	226.102	14.7717	36.4352	2.73869	experimental
836	he_16903	CAAGAAGAUGAUAGAGGGUUUCUGAUU	27	30	244.343	15.3295	33.7407	3.55825	experimental
837	TU583	UCCUUACCACACCGUGGACGAGAUCAACCUUA	27	31	217.667	10.8015	32.1389	2.08447	experimental
838	TU589	AUGACCUAGUAGAGCUCACCAGAUCUGGCCCC	28	1	263.037	14.2093	32.5556	2.81629	experimental
839	xbz_28039	GAUGAUAGUGGUGUUCAUGU	28	2	240.13	12.0304	28.8056	3.66967	experimental
840	he_17443	ACCUUCUUGUAUAAGCACUG	28	3	246.769	9.98279	34.4352	2.93949	experimental
841	xbz_9572	CACGCUCAUGCACACACCCACA	28	4	1698.01	94.1091	346.787	26.6174	experimental
842	he_30220	UUGGGGAAACGGCCGCUGAGUGA	28	5	377.639	29.8521	97.8519	12.334	experimental
843	xbz_15625	ACCCUGUGGUCUAGUGGUUAGGAGUUGG	28	6	21331.1	275.029	755.935	48.6954	experimental
844	he_41514	UCCCUGUAUUCGAAAGUGAUCGUGGGCUG	28	7	433.074	37.5417	35.4537	3.96335	experimental
845	he_9775	GACCUCGUGGCGCAAUGGUAGCGCGUCUG	28	8	1656.64	72.6343	190.824	23.5133	experimental
846	he_31201	UCUCAGGAGUAAAGACAGAGUU	28	9	248.519	19.1553	35.9352	2.95218	experimental
847	he_1586	GGUUGGUGGUUCGAUCCCACCCAGGGACG	28	10	15315.9	284.106	2761.39	70.0503	experimental
848	TU589	AUGACCUAGUAGAGCUCACCAGAUCUGGCCCC	28	11	271.139	15.7168	42.2315	8.95744	experimental
849	xbz_28039	GAUGAUAGUGGUGUUCAUGU	28	12	233.898	11.8266	32.9537	2.96832	experimental
850	he_17443	ACCUUCUUGUAUAAGCACUG	28	13	217.472	14.7391	31.6852	2.50102	experimental
851	xbz_9572	CACGCUCAUGCACACACCCACA	28	14	1497.76	70.1874	351.167	32.1482	experimental
852	he_30220	UUGGGGAAACGGCCGCUGAGUGA	28	15	320.889	24.6479	89.8148	11.0429	experimental
853	xbz_15625	ACCCUGUGGUCUAGUGGUUAGGAGUUGG	28	16	20023.8	234.264	806.972	49.3612	experimental
854	he_41514	UCCCUGUAUUCGAAAGUGAUCGUGGGCUG	28	17	392.972	24.128	43.9722	3.90173	experimental
855	he_9775	GACCUCGUGGCGCAAUGGUAGCGCGUCUG	28	18	1591.44	51.9592	190.019	18.9988	experimental
856	he_31201	UCUCAGGAGUAAAGACAGAGUU	28	19	210.231	12.9359	34.0463	4.46876	experimental
857	he_1586	GGUUGGUGGUUCGAUCCCACCCAGGGACG	28	20	13721.7	227.595	2693.52	140.942	experimental
858	rt_chr16_B_7	AUGGUCUGGGGGACACUCAUUCUUUAUUUAUC	28	21	200.593	12.7639	29.2315	3.76309	experimental
859	xbz_28039	GAUGAUAGUGGUGUUCAUGU	28	22	219.602	15.858	32.1204	2.35502	experimental
860	he_17443	ACCUUCUUGUAUAAGCACUG	28	23	218.333	12.2023	35.0185	3.12954	experimental
861	xbz_9572	CACGCUCAUGCACACACCCACA	28	24	1440.23	93.5196	344.194	32.2164	experimental
862	he_30220	UUGGGGAAACGGCCGCUGAGUGA	28	25	336.593	24.1468	92.5648	11.9001	experimental
863	xbz_15625	ACCCUGUGGUCUAGUGGUUAGGAGUUGG	28	26	19166.5	424.828	728.944	57.7608	experimental
864	he_41514	UCCCUGUAUUCGAAAGUGAUCGUGGGCUG	28	27	400.537	33.3754	37.2407	4.55264	experimental
865	he_9775	GACCUCGUGGCGCAAUGGUAGCGCGUCUG	28	28	1575.98	75.0918	203.13	23.63	experimental
866	he_31201	UCUCAGGAGUAAAGACAGAGUU	28	29	215.333	11.4964	32.6852	4.17077	experimental
867	he_1586	GGUUGGUGGUUCGAUCCCACCCAGGGACG	28	30	14893.1	286.556	2913.07	88.0626	experimental
868	TU589	AUGACCUAGUAGAGCUCACCAGAUCUGGCCCC	28	31	259.352	16.7512	35.5278	4.92269	experimental
869	TU56	UUCUUUGUUCCUUCUCCACUCCCACUAGCGUG	29	1	29053.2	403.428	312.167	33.2767	experimental
870	xbz_29174	AGCUACAUCUGGCUACUGGGUCU	29	2	15264.3	186.337	25190.5	550.158	experimental
871	he_4179	UGAGGUAGUAGUUACAGUU	29	3	247.204	6.59476	34.2222	2.4961	experimental
872	xbz_3741	UAUUGCACUUGUCCCGGCCUGUU	29	4	11357.2	150.528	9999.04	262.577	experimental
873	he_30086	UGCUGGAUCAGUGGUUCGAGUC	29	5	264.63	22.3325	41.4444	4.87859	experimental
874	xbz_15847	GCGUUGGUGGUAUAGUGGUGAGGAUAGCUG	29	6	31341.4	475.899	3764.4	105.585	experimental
875	he_41519	CACCUGUAUUCGAAAGUGAUCGUGGGCUG	29	7	441.963	25.9417	39.4907	6.68866	experimental
876	he_9776	AAGGUUGCGUGUUCAAGUCACGUCGGG	29	8	9197.15	159.559	363.222	37.4464	experimental
877	he_41925	GCUACAUGAUGUGAUUAUUCUGAGAAC	29	9	250.157	9.04729	34.1389	2.63853	experimental
878	he_16289	AGCGAUGAUGAGAUAGCCAGGCUGAAG	29	10	254.102	10.9305	36.9352	2.8194	experimental
879	TU56	UUCUUUGUUCCUUCUCCACUCCCACUAGCGUG	29	11	28061.4	337.704	342.231	39.6535	experimental
880	xbz_29174	AGCUACAUCUGGCUACUGGGUCU	29	12	13937.9	266.696	24969.4	431.755	experimental
881	he_4179	UGAGGUAGUAGUUACAGUU	29	13	210.898	13.0863	33.3704	4.60311	experimental
882	xbz_3741	UAUUGCACUUGUCCCGGCCUGUU	29	14	9964.55	171.174	10598.3	281.401	experimental
883	he_30086	UGCUGGAUCAGUGGUUCGAGUC	29	15	230.713	18.5281	40.5093	5.93815	experimental
884	xbz_15847	GCGUUGGUGGUAUAGUGGUGAGGAUAGCUG	29	16	29181.1	278.798	3622.2	98.2729	experimental
885	he_41519	CACCUGUAUUCGAAAGUGAUCGUGGGCUG	29	17	402.278	19.6125	44.8241	6.18081	experimental
886	he_9776	AAGGUUGCGUGUUCAAGUCACGUCGGG	29	18	8353.33	123.957	333.861	18.3718	experimental
887	he_41925	GCUACAUGAUGUGAUUAUUCUGAGAAC	29	19	215.546	10.4831	35.2315	2.84689	experimental
888	he_16289	AGCGAUGAUGAGAUAGCCAGGCUGAAG	29	20	216.241	13.8442	32.3056	3.03395	experimental
889	rt_chr3_E_1	AAAGACCUGGCUUGUAAUUCUUUUAACCCCUG	29	21	201.38	9.82246	31.5833	3.64583	experimental
890	xbz_29174	AGCUACAUCUGGCUACUGGGUCU	29	22	12828.3	278.792	22688.5	246.504	experimental
891	he_4179	UGAGGUAGUAGUUACAGUU	29	23	210.259	11.683	37.3426	4.37316	experimental
892	xbz_3741	UAUUGCACUUGUCCCGGCCUGUU	29	24	9594.76	185.752	9226.81	164.366	experimental
893	he_30086	UGCUGGAUCAGUGGUUCGAGUC	29	25	237.639	19.598	42.5093	4.8942	experimental
894	xbz_15847	GCGUUGGUGGUAUAGUGGUGAGGAUAGCUG	29	26	26999.9	246.242	3335.14	83.7705	experimental
895	he_41519	CACCUGUAUUCGAAAGUGAUCGUGGGCUG	29	27	389.056	29.0394	38.7407	3.94914	experimental
896	he_9776	AAGGUUGCGUGUUCAAGUCACGUCGGG	29	28	8182.11	133.692	333.491	24.5279	experimental
897	he_41925	GCUACAUGAUGUGAUUAUUCUGAGAAC	29	29	214.139	13.3111	30.6759	2.76097	experimental
898	he_16289	AGCGAUGAUGAGAUAGCCAGGCUGAAG	29	30	227.13	12.9745	34.9537	4.08413	experimental
899	TU56	UUCUUUGUUCCUUCUCCACUCCCACUAGCGUG	29	31	28717.5	355.621	351.167	30.5558	experimental
900	TU600	UAAAUAGUAUGGCUUUGAAGAAGGCGUGGGUA	30	1	1571.22	147.648	52.0278	8.61151	experimental
901	xbz_25884	UUAUAAAGCAAUGAGACUGAUU	30	2	305.019	18.0078	78.5278	9.22457	experimental
902	he_138	GGCUUGGUCUAGGGGUGUCAU	30	3	274.731	13.607	39.8426	6.62502	experimental
903	xbz_250	UGUAAACAUCCUUGACUGGAAGCU	30	4	1705.64	78.2797	5201.46	138.73	experimental
904	he_33220	GAGGAGCCAAUGGGGCGAAGCU	30	5	6022.95	120.909	907.111	42.5898	experimental
905	xbz_17038	GGGGGUGUAGCUCAGUGGUAGAGCGG	30	6	19830.2	368.388	2476.09	148.717	experimental
906	he_42309	UUCAGUGAUGAGGCCUGGAAUGUGCGCUG	30	7	260.019	12.9651	69.9907	12.2661	experimental
907	he_9882	CUCCCACUGCUAAAUUUGACUGGCUUU	30	8	24533.6	361.482	593.861	44.9287	experimental
908	he_29755	AUUGUGUUUAACAACAGAG	30	9	240.593	13.5991	33.5185	3.99645	experimental
909	he_9637	CCCGGCCAAUGCACGAGUACAGUUUU	30	10	506.25	33.329	51.2315	5.31548	experimental
910	TU600	UAAAUAGUAUGGCUUUGAAGAAGGCGUGGGUA	30	11	1628.43	122.404	63.3981	6.07114	experimental
911	xbz_25884	UUAUAAAGCAAUGAGACUGAUU	30	12	291.843	22.6518	92.6296	12.9691	experimental
912	he_138	GGCUUGGUCUAGGGGUGUCAU	30	13	228.417	19.1028	38.1019	4.63013	experimental
913	xbz_250	UGUAAACAUCCUUGACUGGAAGCU	30	14	1542.06	77.4723	5441.3	98.5244	experimental
914	he_33220	GAGGAGCCAAUGGGGCGAAGCU	30	15	5421.54	211.583	901.259	50.2419	experimental
915	xbz_17038	GGGGGUGUAGCUCAGUGGUAGAGCGG	30	16	18751.1	260.346	2433.71	75.6295	experimental
916	he_42309	UUCAGUGAUGAGGCCUGGAAUGUGCGCUG	30	17	239.139	12.3912	77.2685	11.6936	experimental
917	he_9882	CUCCCACUGCUAAAUUUGACUGGCUUU	30	18	21808.6	267.395	555.204	41.7054	experimental
918	he_29755	AUUGUGUUUAACAACAGAG	30	19	207.148	21.9459	31.0741	3.39242	experimental
919	he_9637	CCCGGCCAAUGCACGAGUACAGUUUU	30	20	434.407	29.6824	49.3981	7.96833	experimental
920	chr11_A_7	GCUCUGCCCCACUUUCCUCACUCCAGGACUCA	30	21	201.898	6.90244	30.1759	2.94443	experimental
921	xbz_25884	UUAUAAAGCAAUGAGACUGAUU	30	22	270.296	17.765	89.2685	12.2066	experimental
922	he_138	GGCUUGGUCUAGGGGUGUCAU	30	23	221.685	13.627	39.6389	3.68746	experimental
923	xbz_250	UGUAAACAUCCUUGACUGGAAGCU	30	24	1461.05	62.582	4802.63	110.74	experimental
924	he_33220	GAGGAGCCAAUGGGGCGAAGCU	30	25	5001.91	138.404	877.194	53.7816	experimental
925	xbz_17038	GGGGGUGUAGCUCAGUGGUAGAGCGG	30	26	17749.2	227.769	2219.06	85.0658	experimental
926	he_42309	UUCAGUGAUGAGGCCUGGAAUGUGCGCUG	30	27	218.963	16.0489	72.5093	9.10633	experimental
927	he_9882	CUCCCACUGCUAAAUUUGACUGGCUUU	30	28	21540	378.2	558.62	24.6731	experimental
928	he_29755	AUUGUGUUUAACAACAGAG	30	29	228.102	16.4481	30.6852	2.46337	experimental
929	he_9637	CCCGGCCAAUGCACGAGUACAGUUUU	30	30	515.019	40.0656	50.5648	7.53716	experimental
930	TU600	UAAAUAGUAUGGCUUUGAAGAAGGCGUGGGUA	30	31	1644.68	74.2719	58.4722	7.49761	experimental
931	TU605	CCAACUUGUAUUUCUUAAACACCAUUUAGGGG	31	1	249.426	12.919	32.3241	3.00414	experimental
932	xbz_29013	CUUUGGGUGCUAAUGGUGGAGUUA	31	2	19122.4	341.521	8190.79	205.816	experimental
933	he_7788	AAACAUAUUUGAGACUCUUCUUA	31	3	265.88	16.1371	35.3426	3.12111	experimental
934	xbz_13762	AGAGCUUAGCUGAUUGGUGAACA	31	4	1322.64	69.279	134.213	21.7161	experimental
935	he_26755	UGGCAGUGUCUUAGCUGGUUGU	31	5	1756.26	90.188	3380.42	177.473	experimental
936	xbz_21862	CCGUGGUGGUAUAGUGGUGAGCAUAGCUG	31	6	30098.8	342.591	4028.04	84.3936	experimental
937	he_42311	GUUCGUUGAUGAGGCUCAGAGUGAGCGCUG	31	7	268.62	10.3704	290.287	47.5326	experimental
938	he_10021	CUGCCAUGAUGCUAGACUCCUGAGCAGA	31	8	241.843	9.05968	39.6759	3.76116	experimental
939	he_27797	AAAUAGGGUUGAUGACAUUU	31	9	244.806	18.5364	33.6389	3.47073	experimental
940	he_10229	CAGGUCCCAUGGUGUAAUGGUUAGCACU	31	10	998.454	49.1778	169.954	15.0745	experimental
941	TU605	CCAACUUGUAUUUCUUAAACACCAUUUAGGGG	31	11	226.917	11.918	30.1204	3.63708	experimental
942	xbz_29013	CUUUGGGUGCUAAUGGUGGAGUUA	31	12	17410.5	320.854	7903.16	150.935	experimental
943	he_7788	AAACAUAUUUGAGACUCUUCUUA	31	13	222.917	15.6719	32.7037	5.08849	experimental
944	xbz_13762	AGAGCUUAGCUGAUUGGUGAACA	31	14	1157.06	59.5978	135.194	13.8047	experimental
945	he_26755	UGGCAGUGUCUUAGCUGGUUGU	31	15	1537.86	75.4287	3483.94	111.115	experimental
946	xbz_21862	CCGUGGUGGUAUAGUGGUGAGCAUAGCUG	31	16	27673.3	262.732	3950.06	103.981	experimental
947	he_42311	GUUCGUUGAUGAGGCUCAGAGUGAGCGCUG	31	17	254.667	10.6736	266.889	17.2206	experimental
948	he_10021	CUGCCAUGAUGCUAGACUCCUGAGCAGA	31	18	223.176	12.1731	42.4074	4.93327	experimental
949	he_27797	AAAUAGGGUUGAUGACAUUU	31	19	208.88	11.794	34.0556	3.18241	experimental
950	he_10229	CAGGUCCCAUGGUGUAAUGGUUAGCACU	31	20	859.657	45.2801	139.241	18.2316	experimental
951	chr9_B_6	AAUAUACUUGUAUUUAUUUACUAUUACCACAG	31	21	197.917	12.4135	31.4259	2.53648	experimental
952	xbz_29013	CUUUGGGUGCUAAUGGUGGAGUUA	31	22	16505.6	352.323	7452.36	235.007	experimental
953	he_7788	AAACAUAUUUGAGACUCUUCUUA	31	23	221	11.2041	33.6574	2.80907	experimental
954	xbz_13762	AGAGCUUAGCUGAUUGGUGAACA	31	24	1124.27	55.2538	124.62	10.3407	experimental
955	he_26755	UGGCAGUGUCUUAGCUGGUUGU	31	25	1403.82	92.7252	3157.31	55.1193	experimental
956	xbz_21862	CCGUGGUGGUAUAGUGGUGAGCAUAGCUG	31	26	25781.2	349.178	3505.58	92.2407	experimental
957	he_42311	GUUCGUUGAUGAGGCUCAGAGUGAGCGCUG	31	27	236.583	15.1658	278.111	23.6502	experimental
958	he_10021	CUGCCAUGAUGCUAGACUCCUGAGCAGA	31	28	241.269	22.2839	36.0185	2.72401	experimental
959	he_27797	AAAUAGGGUUGAUGACAUUU	31	29	227.565	9.39405	32.5463	3.69487	experimental
960	he_10229	CAGGUCCCAUGGUGUAAUGGUUAGCACU	31	30	998.407	48.7274	176.25	18.0073	experimental
961	TU605	CCAACUUGUAUUUCUUAAACACCAUUUAGGGG	31	31	222.565	17.1885	28.7315	2.87953	experimental
962	TU625	AUAUCUUAAACUGUAAGAUCCUGUUUCUUCAC	32	1	238.935	9.49399	31.2593	2.75942	experimental
963	xbz_19125	UGCAUAGAGCAAGAGCCUUCU	32	2	257.852	16.2813	36.3056	3.40823	experimental
964	he_597	UCUCAGUGAUGAAAACUUUGUC	32	3	248.167	10.8391	34.537	3.21918	experimental
965	xbz_8207	CAGUGCAAUGAUGAAAGGGCAU	32	4	587.815	37.2223	544.639	55.9408	experimental
966	he_31933	AUAAUAUUGCUGAAUAAAUUGUA	32	5	243.676	12.1192	31.8333	2.17677	experimental
967	xbz_23915	GGGGGUGUAGCUCAGUGGUAGAGCAU	32	6	18638	360.263	2350.66	115.265	experimental
968	he_43348	GGCUUCAUAGCUCAGGGGUUAGAGCACUG	32	7	7695.74	202.014	1166.94	76.6103	experimental
969	he_10106	AAGGAUGAUGAGACAGGCUAUGCUGAAG	32	8	262.972	17.468	38.6019	3.59631	experimental
970	he_45339	AAUUAAAAUAUGGCAUUGUAUAACA	32	9	261.972	14.9906	35.7037	3.54743	experimental
971	he_20939	GUUUCCGUAGUGUAGUGGUUGUCACGUUU	32	10	10549.6	200.873	374.556	26.333	experimental
972	TU625	AUAUCUUAAACUGUAAGAUCCUGUUUCUUCAC	32	11	230.167	10.5534	30.3333	2.53204	experimental
973	xbz_19125	UGCAUAGAGCAAGAGCCUUCU	32	12	236.352	15.9832	37.6759	3.40376	experimental
974	he_597	UCUCAGUGAUGAAAACUUUGUC	32	13	212.352	10.93	33.8148	3.50206	experimental
975	xbz_8207	CAGUGCAAUGAUGAAAGGGCAU	32	14	517.259	34.123	560.25	31.2327	experimental
976	he_31933	AUAAUAUUGCUGAAUAAAUUGUA	32	15	224.213	15.6074	32.4444	5.53043	experimental
977	xbz_23915	GGGGGUGUAGCUCAGUGGUAGAGCAU	32	16	17107.5	392.688	2257.7	49.8724	experimental
978	he_43348	GGCUUCAUAGCUCAGGGGUUAGAGCACUG	32	17	7018.01	188.98	1145.65	55.1361	experimental
979	he_10106	AAGGAUGAUGAGACAGGCUAUGCUGAAG	32	18	225.472	11.6895	36.5926	2.65822	experimental
980	he_45339	AAUUAAAAUAUGGCAUUGUAUAACA	32	19	207.13	12.2208	31.2685	1.55645	experimental
981	he_20939	GUUUCCGUAGUGUAGUGGUUGUCACGUUU	32	20	9008.95	224.564	340.676	33.7447	experimental
982	chr13_D_6	UGGCCACAUUUCUCCUGGUAUAAGUCACUUGC	32	21	200.148	13.5321	30.8148	1.90988	experimental
983	xbz_19125	UGCAUAGAGCAAGAGCCUUCU	32	22	232.028	21.1614	37.4537	4.53106	experimental
984	he_597	UCUCAGUGAUGAAAACUUUGUC	32	23	216.38	6.95341	35.4167	3.44279	experimental
985	xbz_8207	CAGUGCAAUGAUGAAAGGGCAU	32	24	526.87	69.2174	511.796	35.9786	experimental
986	he_31933	AUAAUAUUGCUGAAUAAAUUGUA	32	25	205.491	10.257	33.3148	5.04864	experimental
987	xbz_23915	GGGGGUGUAGCUCAGUGGUAGAGCAU	32	26	16569.5	342.379	2138.35	88.4475	experimental
988	he_43348	GGCUUCAUAGCUCAGGGGUUAGAGCACUG	32	27	6755.8	187.617	1042.25	56.4235	experimental
989	he_10106	AAGGAUGAUGAGACAGGCUAUGCUGAAG	32	28	225.602	10.7155	34.3611	4.471	experimental
990	he_45339	AAUUAAAAUAUGGCAUUGUAUAACA	32	29	225.287	11.3426	30.9167	2.69692	experimental
991	he_20939	GUUUCCGUAGUGUAGUGGUUGUCACGUUU	32	30	10296.1	106.206	429.204	30.667	experimental
992	TU625	AUAUCUUAAACUGUAAGAUCCUGUUUCUUCAC	32	31	211.528	9.20632	28.3981	2.02757	experimental
993	TU655	GCAAGAAGUGCAAAAGUUUAUGUGGUUAGGCU	33	1	247.324	9.80352	32.6111	2.33155	experimental
994	xbz_16233	GCUUAUCAGACUGAUGCUGAAA	33	2	49068.5	375.44	48012.8	532.334	experimental
995	he_4830	UCAAGUGAAAAUGGCAGAACUUCA	33	3	270.398	13.7874	50.0926	4.43128	experimental
996	xbz_9265	GUUUCCCAGCCAACGCACCA	33	4	8998.7	317.582	1028.56	55.7346	experimental
997	he_28825	UAGCACCAUUUGAAAUCGGUUA	33	5	4093.06	125.935	10308.7	254.818	experimental
998	xbz_25897	GUUUCCGUAGUGUAGUGGUCAUCACGUUC	33	6	23448.4	384.354	3288.88	146.702	experimental
999	he_43686	GGGGGUGUAGCUCAGUGGUAGAGCAU	33	7	18293.6	297.51	2431.91	111.409	experimental
1000	he_10527	GACCGCGUGGCCUAAUGGAUAAGGCGUCUG	33	8	13830.5	214.042	3115.29	83.8149	experimental
1001	he_35105	AGAGGUAGUAGGUAUAGUG	33	9	283.306	18.0785	50.287	6.54824	experimental
1002	he_23994	UUUUUCUCCAGCUCCCGAUGACUUAUGGCA	33	10	262.102	13.8658	35.6852	2.59996	experimental
1003	TU655	GCAAGAAGUGCAAAAGUUUAUGUGGUUAGGCU	33	11	221.213	9.25551	33.7315	2.98158	experimental
1004	xbz_16233	GCUUAUCAGACUGAUGCUGAAA	33	12	43797.4	354.799	47795	406.114	experimental
1005	he_4830	UCAAGUGAAAAUGGCAGAACUUCA	33	13	230.593	16.7934	46.1296	5.28106	experimental
1006	xbz_9265	GUUUCCCAGCCAACGCACCA	33	14	8133.31	135.134	1011.94	61.6907	experimental
1007	he_28825	UAGCACCAUUUGAAAUCGGUUA	33	15	3757.87	131.89	11408.5	264.713	experimental
1008	xbz_25897	GUUUCCGUAGUGUAGUGGUCAUCACGUUC	33	16	21326.6	316.005	3221.69	91.2863	experimental
1009	he_43686	GGGGGUGUAGCUCAGUGGUAGAGCAU	33	17	17088.2	191.803	2282.99	58.5269	experimental
1010	he_10527	GACCGCGUGGCCUAAUGGAUAAGGCGUCUG	33	18	12089	132.313	2740.58	127.471	experimental
1011	he_35105	AGAGGUAGUAGGUAUAGUG	33	19	236.657	18.4539	48.0278	4.40573	experimental
1012	he_23994	UUUUUCUCCAGCUCCCGAUGACUUAUGGCA	33	20	215.37	12.3353	34.2037	4.41696	experimental
1013	rt_chr2_D_2	AGGAUUGCAGUCACUGCAUGAAGUUAGUCACC	33	21	199.056	12.8025	33.6389	2.9369	experimental
1014	xbz_16233	GCUUAUCAGACUGAUGCUGAAA	33	22	40560.7	448.101	45229.1	446.512	experimental
1015	he_4830	UCAAGUGAAAAUGGCAGAACUUCA	33	23	225.972	16.7842	47.7963	3.58282	experimental
1016	xbz_9265	GUUUCCCAGCCAACGCACCA	33	24	7569.31	146.144	909.796	46.3983	experimental
1017	he_28825	UAGCACCAUUUGAAAUCGGUUA	33	25	3645.15	125.588	10348.2	223.807	experimental
1018	xbz_25897	GUUUCCGUAGUGUAGUGGUCAUCACGUUC	33	26	20007.8	333.106	2945.56	97.0779	experimental
1019	he_43686	GGGGGUGUAGCUCAGUGGUAGAGCAU	33	27	16565.4	205.818	2177.86	87.1742	experimental
1020	he_10527	GACCGCGUGGCCUAAUGGAUAAGGCGUCUG	33	28	12462.4	322.391	2736.82	106.885	experimental
1021	he_35105	AGAGGUAGUAGGUAUAGUG	33	29	236.241	9.50344	48.8704	7.67213	experimental
1022	he_23994	UUUUUCUCCAGCUCCCGAUGACUUAUGGCA	33	30	234.657	13.4207	33.2222	4.04261	experimental
1023	TU655	GCAAGAAGUGCAAAAGUUUAUGUGGUUAGGCU	33	31	213.565	11.2676	30.1111	3.51587	experimental
1024	TU668	CUCAUUUUACCUUGAUUAGUGACUCAACUCAU	34	1	245.093	12.078	30.8426	1.89521	experimental
1025	xbz_13765	UGGCUCAGUUCAGCAGGAACAGGA	34	2	19673.2	226.256	30891.4	499.067	experimental
1026	he_20459	GACAAUGAUGAGAAGACCUGAGG	34	3	277.806	14.8874	40.9352	4.06552	experimental
1027	xbz_11501	GAGUUCUUCCUACGAUC	34	4	251.954	10.9837	40.1296	4.13576	experimental
1028	he_32394	UUCAAGUAAUCCAGGAUAGGCUGUU	34	5	18375	316.798	19684.7	414.527	experimental
1029	xbz_26076	GCUUCUGUAGUGUAGUGGUUAUCACGUUC	34	6	13369	203.282	792.787	69.552	experimental
1030	he_43853	GGUUCCAUAGUGUAAUGGUGAGCACUCUGA	34	7	12666.2	298.274	3148.47	127.564	experimental
1031	he_10552	UUUCUGUGUGGAAUUUGAAUAUCUGAAA	34	8	248.352	15.6559	202.648	24.4946	experimental
1032	he_36506	UAGCAGCACAGAAAUAUUGGCA	34	9	532.083	42.6869	338.444	32.1638	experimental
1033	he_17916	AACUGACUUUAAGCAAAAUGACACGU	34	10	240.843	8.73297	34.1667	3.20776	experimental
1034	TU668	CUCAUUUUACCUUGAUUAGUGACUCAACUCAU	34	11	230.722	10.5952	31.75	3.32401	experimental
1035	xbz_13765	UGGCUCAGUUCAGCAGGAACAGGA	34	12	17668.4	280.175	30870.2	282.129	experimental
1036	he_20459	GACAAUGAUGAGAAGACCUGAGG	34	13	231.63	10.4663	38.3148	3.49539	experimental
1037	xbz_11501	GAGUUCUUCCUACGAUC	34	14	226.787	13.7658	36.1574	3.26168	experimental
1038	he_32394	UUCAAGUAAUCCAGGAUAGGCUGUU	34	15	15978.8	248.061	20998.5	407.133	experimental
1039	xbz_26076	GCUUCUGUAGUGUAGUGGUUAUCACGUUC	34	16	12024.8	303.406	817.889	46.6815	experimental
1040	he_43853	GGUUCCAUAGUGUAAUGGUGAGCACUCUGA	34	17	11722.9	218.548	2856.69	69.6568	experimental
1041	he_10552	UUUCUGUGUGGAAUUUGAAUAUCUGAAA	34	18	210.824	12.5011	204.741	21.0084	experimental
1042	he_36506	UAGCAGCACAGAAAUAUUGGCA	34	19	382.176	25.5038	301.444	23.5964	experimental
1043	he_17916	AACUGACUUUAAGCAAAAUGACACGU	34	20	212.13	18.915	33.5926	3.42895	experimental
1044	rt_chr1_G_1	UUUUAUUAUGUAUAAAAAUUUGAUUAUAAAUC	34	21	195.491	10.6626	32.4444	1.75261	experimental
1045	xbz_13765	UGGCUCAGUUCAGCAGGAACAGGA	34	22	16353.5	351.822	28494.7	308.718	experimental
1046	he_20459	GACAAUGAUGAGAAGACCUGAGG	34	23	226.102	14.8437	40.1481	2.9539	experimental
1047	xbz_11501	GAGUUCUUCCUACGAUC	34	24	200.602	8.11246	34.3056	2.68418	experimental
1048	he_32394	UUCAAGUAAUCCAGGAUAGGCUGUU	34	25	15270.3	222.131	18424.9	345.571	experimental
1049	xbz_26076	GCUUCUGUAGUGUAGUGGUUAUCACGUUC	34	26	11521.6	273.295	702.593	38.5266	experimental
1050	he_43853	GGUUCCAUAGUGUAAUGGUGAGCACUCUGA	34	27	11222.7	268.445	2789.45	92.6455	experimental
1051	he_10552	UUUCUGUGUGGAAUUUGAAUAUCUGAAA	34	28	222.065	10.6729	205.287	27.0814	experimental
1052	he_36506	UAGCAGCACAGAAAUAUUGGCA	34	29	452.528	36.7318	357.63	33.5672	experimental
1053	he_17916	AACUGACUUUAAGCAAAAUGACACGU	34	30	233.676	9.19145	31.8519	2.71656	experimental
1054	TU668	CUCAUUUUACCUUGAUUAGUGACUCAACUCAU	34	31	210.75	9.56642	30.1296	2.86158	experimental
1055	TU675	GCCUCUUUGAGGUUGGAAUAUCUGCACCCCUG	35	1	248.157	11.0953	31.3981	2.50211	experimental
1056	xbz_10531	AACGUGACCGAUCCCGGA	35	2	262.898	18.433	40.6296	4.0177	experimental
1057	he_25933	UAUUGCUUGUCCAGGCCUAU	35	3	261.63	8.93548	36.75	3.28157	experimental
1058	xbz_1805	AGACACGUUGCGUAUUG	35	4	265.213	16.9397	37.6574	4.67077	experimental
1059	he_53229	CUUAGCAGGUUGUAUUAUCAUU	35	5	253.833	13.2845	34.5463	2.63827	experimental
1060	xbz_26118	GGGGGUGUAGCUCAGUGGUAGAGCGU	35	6	19054.9	349.827	2359.86	61.7906	experimental
1061	he_44379	UCCUAUUUGUAUAGUGCUGAGUAUCCCC	35	7	3873.52	978.644	82.9907	21.6987	experimental
1062	he_11413	UCUCAUGAUGAACACAUAUGCCUCUGAGC	35	8	275.185	13.5448	384.065	38.3187	experimental
1063	he_38587	GGGAAGGUGGCUCGGGGGGUC	35	9	20538.3	310.663	2007.7	77.023	experimental
1064	he_22798	CCUGAUGAUGAAUCUGGAGAUGCUGAUG	35	10	251.565	16.328	36.4074	3.80614	experimental
1065	TU675	GCCUCUUUGAGGUUGGAAUAUCUGCACCCCUG	35	11	229.972	9.51188	31.75	3.62784	experimental
1066	xbz_10531	AACGUGACCGAUCCCGGA	35	12	256.991	22.7454	41.5833	5.74395	experimental
1067	he_25933	UAUUGCUUGUCCAGGCCUAU	35	13	227.954	17.2813	33.8333	4.0821	experimental
1068	xbz_1805	AGACACGUUGCGUAUUG	35	14	235.62	25.154	34.6852	3.48735	experimental
1069	he_53229	CUUAGCAGGUUGUAUUAUCAUU	35	15	210.324	13.9912	32.5926	3.96724	experimental
1070	xbz_26118	GGGGGUGUAGCUCAGUGGUAGAGCGU	35	16	17105.1	197.653	2251.32	88.5815	experimental
1071	he_44379	UCCUAUUUGUAUAGUGCUGAGUAUCCCC	35	17	3865.41	466.739	99.0278	16.538	experimental
1072	he_11413	UCUCAUGAUGAACACAUAUGCCUCUGAGC	35	18	226.38	10.7118	360.787	46.3286	experimental
1073	he_38587	GGGAAGGUGGCUCGGGGGGUC	35	19	17341.2	341.205	1781.44	69.5946	experimental
1074	he_22798	CCUGAUGAUGAAUCUGGAGAUGCUGAUG	35	20	210.269	15.126	34.5833	2.9422	experimental
1075	rt_chr4_A_3	UUGUCUUACUUUCCUCACAUAAGGAGUUAUUU	35	21	194.593	7.96844	29.8333	3.04637	experimental
1076	xbz_10531	AACGUGACCGAUCCCGGA	35	22	244.333	22.2236	42.5741	4.1832	experimental
1077	he_25933	UAUUGCUUGUCCAGGCCUAU	35	23	223.139	12.5434	35.5185	2.42063	experimental
1078	xbz_1805	AGACACGUUGCGUAUUG	35	24	213.75	11.698	35.8611	3.34177	experimental
1079	he_53229	CUUAGCAGGUUGUAUUAUCAUU	35	25	201.63	10.809	31.5185	2.85631	experimental
1080	xbz_26118	GGGGGUGUAGCUCAGUGGUAGAGCGU	35	26	16451.1	215.082	2109.85	78.3296	experimental
1081	he_44379	UCCUAUUUGUAUAGUGCUGAGUAUCCCC	35	27	3719.04	903.899	84.0093	23.6933	experimental
1082	he_11413	UCUCAUGAUGAACACAUAUGCCUCUGAGC	35	28	233.491	15.1673	337.694	26.2748	experimental
1083	he_38587	GGGAAGGUGGCUCGGGGGGUC	35	29	18682.2	291.599	1949.81	66.1054	experimental
1084	he_22798	CCUGAUGAUGAAUCUGGAGAUGCUGAUG	35	30	234.907	9.71706	35.037	3.62217	experimental
1085	TU675	GCCUCUUUGAGGUUGGAAUAUCUGCACCCCUG	35	31	211.5	11.1351	31.3241	2.67501	experimental
1086	BKG0		36	1	226.583	10.3528	30.1667	3.27408	control	control_empty	LC Internal Use
1087	xbz_3163	UGAGGUAGUUGUUGUCUAGUU	36	2	249.759	11.6345	32.4259	2.33704	experimental
1088	he_9059	CAUUCGUGAUGGGGAUGGGGG	36	3	4373.98	291.476	346.25	46.1588	experimental
1089	xbz_3738	ACUGCAUUAUGAGCACUUAAAGU	36	4	255.861	13.7041	37.9352	5.01451	experimental
1090	he_27875	CAGAGCCGCCGCAGGUGCAGAU	36	5	1533.48	79.3607	408.472	31.0105	experimental
1091	xbz_26123	GGGGGUAUAGCUCAGUGGUAGAGCGCG	36	6	17045.7	238.373	2491.31	166.946	experimental
1092	he_44769	AAAUUAGAAAUUUAACAAAAAGAUAGAU	36	7	239.574	16.7495	31.8333	4.46063	experimental
1093	he_11415	GCGGCUGAUGACAGCACUUCUGCUGAGA	36	8	250.88	11.8926	247.148	19.1213	experimental
1094	he_28251	GAGCAUGGUAAUGGAUUUAUG	36	9	242.954	10.9368	32.7222	2.59343	experimental
1095	he_15588	CUUCCCACUGCUAAAUUUAACUGGCA	36	10	18152.5	264.992	148.602	13.7235	experimental
1096	BKG0		36	11	216.639	12.9949	31.25	2.6338	control	control_empty	LC Internal Use
1097	xbz_3163	UGAGGUAGUUGUUGUCUAGUU	36	12	230.806	14.1945	33.5648	2.89141	experimental
1098	he_9059	CAUUCGUGAUGGGGAUGGGGG	36	13	3822.73	299.175	300.713	34.2741	experimental
1099	xbz_3738	ACUGCAUUAUGAGCACUUAAAGU	36	14	230.38	10.566	37.6111	3.01657	experimental
1100	he_27875	CAGAGCCGCCGCAGGUGCAGAU	36	15	1400.57	56.2651	453.352	52.0604	experimental
1101	xbz_26123	GGGGGUAUAGCUCAGUGGUAGAGCGCG	36	16	15483.5	279.285	2549.67	66.3125	experimental
1102	he_44769	AAAUUAGAAAUUUAACAAAAAGAUAGAU	36	17	222.935	15.0453	36.6667	3.79867	experimental
1103	he_11415	GCGGCUGAUGACAGCACUUCUGCUGAGA	36	18	218.778	13.5055	239.407	18.7432	experimental
1104	he_28251	GAGCAUGGUAAUGGAUUUAUG	36	19	205.546	14.6596	32.6296	2.75	experimental
1105	he_15588	CUUCCCACUGCUAAAUUUAACUGGCA	36	20	15695.7	229.2	133.213	14.4261	experimental
1106	BKG0		36	21	178.361	10.3846	29.6296	2.54159	control	control_empty	LC Internal Use
1107	xbz_3163	UGAGGUAGUUGUUGUCUAGUU	36	22	207.324	11.5773	33.3241	4.15771	experimental
1108	he_9059	CAUUCGUGAUGGGGAUGGGGG	36	23	3835.99	187.689	282.185	27.4618	experimental
1109	xbz_3738	ACUGCAUUAUGAGCACUUAAAGU	36	24	213.843	8.7746	34.6481	3.3803	experimental
1110	he_27875	CAGAGCCGCCGCAGGUGCAGAU	36	25	1297.24	43.2307	389.5	27.0073	experimental
1111	xbz_26123	GGGGGUAUAGCUCAGUGGUAGAGCGCG	36	26	15099.9	250.785	2313.28	109.9	experimental
1112	he_44769	AAAUUAGAAAUUUAACAAAAAGAUAGAU	36	27	213.991	10.4519	30.2315	2.9469	experimental
1113	he_11415	GCGGCUGAUGACAGCACUUCUGCUGAGA	36	28	217.176	13.2113	234.667	24.0968	experimental
1114	he_28251	GAGCAUGGUAAUGGAUUUAUG	36	29	217.241	10.8109	31.1389	2.8034	experimental
1115	he_15588	CUUCCCACUGCUAAAUUUAACUGGCA	36	30	17398.9	297.934	176.037	26.0384	experimental
1116	BKG0		36	31	195.38	9.91998	29.4907	3.11312	control	control_empty	LC Internal Use
1117	PUC2PM		37	1	28786.5	398.446	35908.2	1258.43	control	control_spike-calibration	LC Internal Use
1118	xbz_1853	CAAAGUGAUCAAGGUUGACA	37	2	256.889	12.759	34.6759	3.24636	experimental
1119	he_21132	UCAGGUGUGGAAACUGAGGCAG	37	3	293.593	16.3662	56.7222	7.56262	experimental
1120	xbz_13763	UUCACAGUGGCUAAGUUCU	37	4	20425.2	377.097	30542.9	604.014	experimental
1121	he_48829	UGAGCGCCUCGACGACAGAGCCG	37	5	319.204	20.1029	84.3889	10.8635	experimental
1122	xbz_26125	GGGGGUAUAGCUCAGCGGUAGAGCGCG	37	6	16880.9	319.965	2410.45	111.228	experimental
1123	he_44968	UUGUUGUGAUUAAUGUAUGUGGAUGAGG	37	7	245.917	10.3365	54.7685	8.48705	experimental
1124	he_11517	CAUCUGUGAUGUGAACCACAACCUGAGU	37	8	258.667	17.5121	40.8426	3.37711	experimental
1125	he_41025	UGAGGUUAGGUUGUAGAGU	37	9	243.148	17.0797	33.8889	2.66628	experimental
1126	he_5849	AACAAAGAGGUUUGUGGUAGACAUGUAAU	37	10	245.324	13.5342	35.1574	3.18924	experimental
1127	PUC2PM		37	11	27065.6	229.554	32145	290.629	control	control_spike-calibration	LC Internal Use
1128	xbz_1853	CAAAGUGAUCAAGGUUGACA	37	12	224.972	13.3895	34.5278	3.15476	experimental
1129	he_21132	UCAGGUGUGGAAACUGAGGCAG	37	13	254.38	25.0833	44.3333	5.74212	experimental
1130	xbz_13763	UUCACAGUGGCUAAGUUCU	37	14	18074.3	229.004	31099.5	297.373	experimental
1131	he_48829	UGAGCGCCUCGACGACAGAGCCG	37	15	259.176	18.98	76.6111	8.66277	experimental
1132	xbz_26125	GGGGGUAUAGCUCAGCGGUAGAGCGCG	37	16	15352	482.663	2400.97	54.3742	experimental
1133	he_44968	UUGUUGUGAUUAAUGUAUGUGGAUGAGG	37	17	229.954	21.4804	70.5556	12.2233	experimental
1134	he_11517	CAUCUGUGAUGUGAACCACAACCUGAGU	37	18	223.944	11.2531	39.7407	3.89193	experimental
1135	he_41025	UGAGGUUAGGUUGUAGAGU	37	19	214.519	11.0398	33.9167	2.14051	experimental
1136	he_5849	AACAAAGAGGUUUGUGGUAGACAUGUAAU	37	20	200.88	12.3476	30.3056	2.63498	experimental
1137	PUC2PM		37	21	24115.1	335.142	32096.2	327.856	control	control_spike-calibration	LC Internal Use
1138	xbz_1853	CAAAGUGAUCAAGGUUGACA	37	22	220.963	7.80956	38.9074	3.31955	experimental
1139	he_21132	UCAGGUGUGGAAACUGAGGCAG	37	23	236.5	16.8387	49.3056	6.42928	experimental
1140	xbz_13763	UUCACAGUGGCUAAGUUCU	37	24	16854.2	228.465	26901.4	267.31	experimental
1141	he_48829	UGAGCGCCUCGACGACAGAGCCG	37	25	250.556	20.896	80.6204	10.184	experimental
1142	xbz_26125	GGGGGUAUAGCUCAGCGGUAGAGCGCG	37	26	14498.5	241.243	2205.56	61.8434	experimental
1143	he_44968	UUGUUGUGAUUAAUGUAUGUGGAUGAGG	37	27	213.907	15.3717	64.5556	7.58544	experimental
1144	he_11517	CAUCUGUGAUGUGAACCACAACCUGAGU	37	28	241.463	19.3224	36.75	3.05135	experimental
1145	he_41025	UGAGGUUAGGUUGUAGAGU	37	29	215.074	14.7031	33.7778	3.4024	experimental
1146	he_5849	AACAAAGAGGUUUGUGGUAGACAUGUAAU	37	30	219.889	18.5288	31.3426	2.86181	experimental
1147	PUC2PM		37	31	26828.4	370.394	36014.1	518.139	control	control_spike-calibration	LC Internal Use
1148	PUC2MM		38	1	24770.4	332.069	31033.5	624.983	control	control_spike-calibration	LC Internal Use
1149	xbz_2177	CAGUGCAAUGUUAAAAGGGCAU	38	2	845.435	69.759	1634.18	72.1272	experimental
1150	he_1011	CGGCUCUGGGUCUGUGGGGAGC	38	3	1557.31	80.9555	101.278	12.4456	experimental
1151	xbz_13870	UAUGUGCCUUUGGACUACAUCG	38	4	271.426	14.399	51.3611	10.525	experimental
1152	he_51418	UCGAGGAGCUCACAGUCUAGUAU	38	5	4841.02	154.446	2971.42	123.402	experimental
1153	xbz_26127	GGGGGUAUAGCUCAGUGGUAGAGAGUG	38	6	14782.5	409.402	1989.11	82.8576	experimental
1154	he_45766	GGGGGUAUAGCUCAGGGGUAGAGAUUUG	38	7	22252.7	404.517	3347.53	201.419	experimental
1155	he_11751	AACCGAGCGUCCAAGCUCUUUCCAUUU	38	8	343	37.2275	43.9815	4.21608	experimental
1156	he_51341	CUGGGAGGUGGAUGUUUACUUC	38	9	302.824	13.2332	45.5833	3.29294	experimental
1157	he_3161	AUCAGAAGUCUGGUCACCUGGGGAAA	38	10	274.704	25.1207	39.213	5.49945	experimental
1158	PUC2MM		38	11	22896	439.296	27861.9	918.306	control	control_spike-calibration	LC Internal Use
1159	xbz_2177	CAGUGCAAUGUUAAAAGGGCAU	38	12	718.389	47.0444	1512.08	69.6118	experimental
1160	he_1011	CGGCUCUGGGUCUGUGGGGAGC	38	13	1404.02	94.6213	92.8056	13.1045	experimental
1161	xbz_13870	UAUGUGCCUUUGGACUACAUCG	38	14	229.62	9.29347	54.2407	5.27712	experimental
1162	he_51418	UCGAGGAGCUCACAGUCUAGUAU	38	15	4215.68	124.848	3207.15	105.012	experimental
1163	xbz_26127	GGGGGUAUAGCUCAGUGGUAGAGAGUG	38	16	13329	242.226	2001.46	80.4127	experimental
1164	he_45766	GGGGGUAUAGCUCAGGGGUAGAGAUUUG	38	17	20294.2	371.978	2994.41	109.2	experimental
1165	he_11751	AACCGAGCGUCCAAGCUCUUUCCAUUU	38	18	288.75	16.7294	45.8889	5.18685	experimental
1166	he_51341	CUGGGAGGUGGAUGUUUACUUC	38	19	247.361	21.7378	44.6759	5.46669	experimental
1167	he_3161	AUCAGAAGUCUGGUCACCUGGGGAAA	38	20	203.463	10.0656	34.9259	3.08055	experimental
1168	PUC2MM		38	21	20728.5	212.793	27260.5	390.548	control	control_spike-calibration	LC Internal Use
1169	xbz_2177	CAGUGCAAUGUUAAAAGGGCAU	38	22	703.278	47.6506	1403.85	84.947	experimental
1170	he_1011	CGGCUCUGGGUCUGUGGGGAGC	38	23	1323.95	81.6067	92.5926	15.5341	experimental
1171	xbz_13870	UAUGUGCCUUUGGACUACAUCG	38	24	206.463	11.3429	44.8981	5.72899	experimental
1172	he_51418	UCGAGGAGCUCACAGUCUAGUAU	38	25	4167.33	142.255	2902.16	87.2635	experimental
1173	xbz_26127	GGGGGUAUAGCUCAGUGGUAGAGAGUG	38	26	12780.1	198.968	1840.94	70.4726	experimental
1174	he_45766	GGGGGUAUAGCUCAGGGGUAGAGAUUUG	38	27	19668.7	276.382	2922.14	103.168	experimental
1175	he_11751	AACCGAGCGUCCAAGCUCUUUCCAUUU	38	28	298.898	24.8122	42.4815	7.0346	experimental
1176	he_51341	CUGGGAGGUGGAUGUUUACUUC	38	29	260.574	17.3842	41.7778	6.59132	experimental
1177	he_3161	AUCAGAAGUCUGGUCACCUGGGGAAA	38	30	225.315	11.3406	35.3889	3.37066	experimental
1178	PUC2MM		38	31	23233.3	431.882	30751.1	474.049	control	control_spike-calibration	LC Internal Use
1179	PUC2PM-20B		39	1	32020.1	440.018	27026	816.583	control	control_spike-calibration	LC Internal Use
1180	xbz_1041	CAUAACUUGACCUCUCUGACUA	39	2	471.417	36.8696	47.7222	7.67668	experimental
1181	he_16755	GGCCAGUUGGUGAAGCAGUU	39	3	259.593	9.97477	40.1667	9.14524	experimental
1182	xbz_702	UAUUGCACUCGUCCCGGCCU	39	4	7749.98	255.94	6591.75	145.887	experimental
1183	he_49594	CAAAGUGCUGUUCGUGCAGGUAG	39	5	2741.66	113.536	4210.15	111.486	experimental
1184	xbz_28951	AGCUCCGAGGUGAUUUUCAUAUUGAA	39	6	352.074	39.1407	35.5278	3.70516	experimental
1185	he_45964	AGUGAUGUUGUAAAAAUAAAUGUCUGAA	39	7	249.565	15.0918	37.9907	4.9587	experimental
1186	he_11793	GAUAUAGACAGCAGGACGGUGGCCAUGG	39	8	10768.4	186.138	3151.64	136.079	experimental
1187	he_31220	UGGAGACGCGGCCCUGUUGGAGU	39	9	258.333	17.8561	41.5833	6.96738	experimental
1188	he_8384	AUGUUCUCUGAGGACCCGCGGCUUCGCA	39	10	239.306	15.2423	34.6481	1.41629	experimental
1189	PUC2PM-20B		39	11	29626.2	477.899	24148.1	438.231	control	control_spike-calibration	LC Internal Use
1190	xbz_1041	CAUAACUUGACCUCUCUGACUA	39	12	398.204	36.1399	44.1111	6.5272	experimental
1191	he_16755	GGCCAGUUGGUGAAGCAGUU	39	13	225.593	15.1139	32.3981	4.04632	experimental
1192	xbz_702	UAUUGCACUCGUCCCGGCCU	39	14	6809.34	182.651	6616.51	158.732	experimental
1193	he_49594	CAAAGUGCUGUUCGUGCAGGUAG	39	15	2511.1	73.2055	4609.31	110.473	experimental
1194	xbz_28951	AGCUCCGAGGUGAUUUUCAUAUUGAA	39	16	317.88	22.4186	42.0926	2.88903	experimental
1195	he_45964	AGUGAUGUUGUAAAAAUAAAUGUCUGAA	39	17	224.454	13.0301	46.6852	3.54319	experimental
1196	he_11793	GAUAUAGACAGCAGGACGGUGGCCAUGG	39	18	9478.43	229.137	2699.56	81.338	experimental
1197	he_31220	UGGAGACGCGGCCCUGUUGGAGU	39	19	207.667	10.9399	37.2315	5.24111	experimental
1198	he_8384	AUGUUCUCUGAGGACCCGCGGCUUCGCA	39	20	198.426	8.88683	33.3148	2.78731	experimental
1199	PUC2PM-20B		39	21	26262.3	377.855	23914.3	210.839	control	control_spike-calibration	LC Internal Use
1200	xbz_1041	CAUAACUUGACCUCUCUGACUA	39	22	441.63	41.031	45.4537	4.21919	experimental
1201	he_16755	GGCCAGUUGGUGAAGCAGUU	39	23	212.935	11.3708	37.2315	3.25435	experimental
1202	xbz_702	UAUUGCACUCGUCCCGGCCU	39	24	6494.46	162.544	5734.42	182.941	experimental
1203	he_49594	CAAAGUGCUGUUCGUGCAGGUAG	39	25	2413.29	108.96	4016.97	140.739	experimental
1204	xbz_28951	AGCUCCGAGGUGAUUUUCAUAUUGAA	39	26	303.806	20.3922	33.75	3.05747	experimental
1205	he_45964	AGUGAUGUUGUAAAAAUAAAUGUCUGAA	39	27	255.194	75.5417	50.6389	13.8473	experimental
1206	he_11793	GAUAUAGACAGCAGGACGGUGGCCAUGG	39	28	9648.01	235.722	2776.09	70.1512	experimental
1207	he_31220	UGGAGACGCGGCCCUGUUGGAGU	39	29	225.009	17.264	34.4259	2.63053	experimental
1208	he_8384	AUGUUCUCUGAGGACCCGCGGCUUCGCA	39	30	215.037	13.7147	32.4444	2.87865	experimental
1209	PUC2PM-20B		39	31	29727.7	358.259	27030.2	274.126	control	control_spike-calibration	LC Internal Use
1210	PUC2MM-20B		40	1	263.157	14.6684	44.7407	5.16163	control	control_spike-calibration	LC Internal Use
1211	xbz_10778	AGAGAUUAUAAAAUUGGAUUU	40	2	246.25	11.9728	32.1944	1.68256	experimental
1212	he_8861	CGGGGUUUUGAGGGCGAGAUGA	40	3	351.037	17.0989	56.7407	9.82118	experimental
1213	xbz_13761	AUCACAUUGCCAGGGAUUA	40	4	26859.4	367.07	39217.7	783.083	experimental
1214	he_48075	CUUUCAGUCGGAUGUUUGCAGC	40	5	663.287	42.5322	234.176	34.6962	experimental
1215	xbz_998	UCCCUGGUGGUCUAGUGGUUAGGAUUUGG	40	6	38984.4	482.083	5832.45	154.195	experimental
1216	he_46034	CCCCCACUGUUAAAUUUGACUGGCUU	40	7	18818	384.892	276.176	30.1044	experimental
1217	he_12443	GAAAAUGAUGAUCCUUCUCAUCUGAUG	40	8	253	11.1137	34.3611	4.20827	experimental
1218	he_37964	CAACAUGAUGACUCUAGUGCCUGAUU	40	9	256.731	15.1858	96.4722	12.7062	experimental
1219	he_3159	CUGAUGAGAAUGUGAAUAGCUUUUAUU	40	10	239.102	14.6408	34.7593	3.66563	experimental
1220	PUC2MM-20B		40	11	235.519	14.5804	44.3426	6.6896	control	control_spike-calibration	LC Internal Use
1221	xbz_10778	AGAGAUUAUAAAAUUGGAUUU	40	12	210.806	9.87914	30.3148	3.29442	experimental
1222	he_8861	CGGGGUUUUGAGGGCGAGAUGA	40	13	284.583	25.4507	52	4.40475	experimental
1223	xbz_13761	AUCACAUUGCCAGGGAUUA	40	14	23211.8	291.877	39507.3	398.929	experimental
1224	he_48075	CUUUCAGUCGGAUGUUUGCAGC	40	15	613.472	46.6445	243.25	20.3112	experimental
1225	xbz_998	UCCCUGGUGGUCUAGUGGUUAGGAUUUGG	40	16	34351.4	410.64	5875	133.717	experimental
1226	he_46034	CCCCCACUGUUAAAUUUGACUGGCUU	40	17	17097.8	230.672	267.528	29.1453	experimental
1227	he_12443	GAAAAUGAUGAUCCUUCUCAUCUGAUG	40	18	205.241	17.4949	34.4537	2.53346	experimental
1228	he_37964	CAACAUGAUGACUCUAGUGCCUGAUU	40	19	210.315	12.8031	79.8056	10.1746	experimental
1229	he_3159	CUGAUGAGAAUGUGAAUAGCUUUUAUU	40	20	203.019	18.7128	31.287	4.22288	experimental
1230	PUC2MM-20B		40	21	211.352	9.19601	40.9167	4.10635	control	control_spike-calibration	LC Internal Use
1231	xbz_10778	AGAGAUUAUAAAAUUGGAUUU	40	22	206.065	14.0155	33.2593	2.68039	experimental
1232	he_8861	CGGGGUUUUGAGGGCGAGAUGA	40	23	290.639	19.0878	52.3889	7.58606	experimental
1233	xbz_13761	AUCACAUUGCCAGGGAUUA	40	24	21895	444.715	34348.5	410.59	experimental
1234	he_48075	CUUUCAGUCGGAUGUUUGCAGC	40	25	552.769	38.5301	244.056	20.2165	experimental
1235	xbz_998	UCCCUGGUGGUCUAGUGGUUAGGAUUUGG	40	26	32402.5	486.86	5193.29	74.9458	experimental
1236	he_46034	CCCCCACUGUUAAAUUUGACUGGCUU	40	27	16763.4	270.796	262.454	29.3695	experimental
1237	he_12443	GAAAAUGAUGAUCCUUCUCAUCUGAUG	40	28	207.167	9.81083	32.0185	3.21207	experimental
1238	he_37964	CAACAUGAUGACUCUAGUGCCUGAUU	40	29	212.852	7.71673	90.6944	9.99295	experimental
1239	he_3159	CUGAUGAGAAUGUGAAUAGCUUUUAUU	40	30	213.824	12.6135	28.9167	2.28004	experimental
1240	PUC2MM-20B		40	31	217.731	12.7767	38.8148	5.5923	control	control_spike-calibration	LC Internal Use
1241	a2-PUC2PM-20B		41	1	41609.6	426.927	38294.6	973.031	control	control_spike-calibration	LC Internal Use
1242	xbz_1728	UGAGAACUGAAUUCCAUAGGCUGU	41	2	9432.84	287.495	7494.7	271.692	experimental
1243	he_25103	UGGCUCAGUUCAGCAGGAACAGGA	41	3	19645.5	419.615	34757.2	597.697	experimental
1244	xbz_8338	UGAGGUAGUAGGUUGUGUGGUU	41	4	18101.2	376.571	17408.9	528.538	experimental
1245	he_42703	AAUUCUGAAACUAUUUACUUACA	41	5	239.491	14.2819	34.8519	4.4801	experimental
1246	xbz_3182	UCCUCGUUAGUAUAGUGGUUAGUAUCCCCG	41	6	42575.1	546.792	6647.9	232.877	experimental
1247	he_46242	GUUUAUGUAGCUUACUUCCUCAAAGCAAUA	41	7	50589.5	891.125	3591.11	106.517	experimental
1248	he_12588	GCUGAUGAUGAUAAUAUUGCCUGAAG	41	8	242.472	15.9024	68.1481	7.44427	experimental
1249	he_36384	ACCGUGGCUUUCGAUUGUUACU	41	9	256.037	16.8389	42.5278	4.1681	experimental
1250	he_7624	UGCUACCCCCUGCAGGAUUUGGAUACAU	41	10	253.676	15.5009	34.1296	3.45084	experimental
1251	a2-PUC2PM-20B		41	11	38074.3	430.185	32965.6	287.751	control	control_spike-calibration	LC Internal Use
1252	xbz_1728	UGAGAACUGAAUUCCAUAGGCUGU	41	12	8118.38	416.507	7356.02	322.427	experimental
1253	he_25103	UGGCUCAGUUCAGCAGGAACAGGA	41	13	16710.6	194.705	31232.6	563.021	experimental
1254	xbz_8338	UGAGGUAGUAGGUUGUGUGGUU	41	14	16036.7	276.022	17889.4	328.868	experimental
1255	he_42703	AAUUCUGAAACUAUUUACUUACA	41	15	213.102	15.63	34.2037	2.51262	experimental
1256	xbz_3182	UCCUCGUUAGUAUAGUGGUUAGUAUCCCCG	41	16	37668.9	409.077	6989.41	297.663	experimental
1257	he_46242	GUUUAUGUAGCUUACUUCCUCAAAGCAAUA	41	17	45236.8	420.102	3280.33	68.2753	experimental
1258	he_12588	GCUGAUGAUGAUAAUAUUGCCUGAAG	41	18	205.648	10.224	59.3704	6.15469	experimental
1259	he_36384	ACCGUGGCUUUCGAUUGUUACU	41	19	199.407	18.6508	39.3611	4.63521	experimental
1260	he_7624	UGCUACCCCCUGCAGGAUUUGGAUACAU	41	20	207.926	12.5681	32.8889	3.66681	experimental
1261	a2-PUC2PM-20B		41	21	34173.2	536.073	33372.6	268.918	control	control_spike-calibration	LC Internal Use
1262	xbz_1728	UGAGAACUGAAUUCCAUAGGCUGU	41	22	7604.94	168.299	6874.45	152.314	experimental
1263	he_25103	UGGCUCAGUUCAGCAGGAACAGGA	41	23	15773.5	267.413	28405.7	214.72	experimental
1264	xbz_8338	UGAGGUAGUAGGUUGUGUGGUU	41	24	15190.1	273.355	15550.8	423.195	experimental
1265	he_42703	AAUUCUGAAACUAUUUACUUACA	41	25	200.13	14.5834	34.787	2.89392	experimental
1266	xbz_3182	UCCUCGUUAGUAUAGUGGUUAGUAUCCCCG	41	26	35681.2	449.144	6401.25	157.034	experimental
1267	he_46242	GUUUAUGUAGCUUACUUCCUCAAAGCAAUA	41	27	43940.5	441.722	3218.4	116.738	experimental
1268	he_12588	GCUGAUGAUGAUAAUAUUGCCUGAAG	41	28	206.093	9.18505	61.7685	8.46831	experimental
1269	he_36384	ACCGUGGCUUUCGAUUGUUACU	41	29	218.88	9.71819	39.5648	4.06782	experimental
1270	he_7624	UGCUACCCCCUGCAGGAUUUGGAUACAU	41	30	231.87	14.3976	33.8519	3.19115	experimental
1271	a2-PUC2PM-20B		41	31	37782.6	513.92	37406	382.423	control	control_spike-calibration	LC Internal Use
1272	a2-PUC2MM-20B		42	1	281.843	16.2084	43.2685	4.24398	control	control_spike-calibration	LC Internal Use
1273	xbz_10532	GGAAAGCGUCGCGGU	42	2	4238.35	240.804	775.722	50.3444	experimental
1274	xbz_23158	GUUUGAUUGCUGUCGGAGCCA	42	3	270.12	16.1562	36.0278	3.44912	experimental
1275	xbz_12440	UCUGUGUCUGAAUCUGUUAG	42	4	249.037	15.1786	35.6019	4.11503	experimental
1276	he_38410	GGGGUUCCUGGGGAUGGGAUUU	42	5	816.528	33.5831	140.315	25.1517	experimental
1277	xbz_4623	GGGGGUAUAGCUCAGUGGGUAGAGCAUUUG	42	6	18798.5	304.852	2922.53	157.301	experimental
1278	he_46408	GAGAAAGCUCAUAAGAACUGCUAACU	42	7	30227.7	356.362	7878.81	210.334	experimental
1279	he_13183	UCAGAGAGCUAUCUUAAGAGCAAGAAA	42	8	263.102	11.5167	35.4907	3.65701	experimental
1280	he_46244	GAGUCACAGUCCGAUGA	42	9	237.278	12.3325	36.5926	4.87802	experimental
1281	he_15138	AAGCCCGGAAGGUGGAGAUUGCAGUG	42	10	251.537	15.9012	33.8981	2.36382	experimental
1282	a2-PUC2MM-20B		42	11	237.713	20.7315	44.9167	3.86483	control	control_spike-calibration	LC Internal Use
1283	xbz_10532	GGAAAGCGUCGCGGU	42	12	3622.72	160.564	758.509	63.7912	experimental
1284	xbz_23158	GUUUGAUUGCUGUCGGAGCCA	42	13	209.537	14.9582	39.0741	5.02834	experimental
1285	xbz_12440	UCUGUGUCUGAAUCUGUUAG	42	14	215.87	15.143	35.5741	3.68428	experimental
1286	he_38410	GGGGUUCCUGGGGAUGGGAUUU	42	15	768.065	51.8552	160.296	12.4129	experimental
1287	xbz_4623	GGGGGUAUAGCUCAGUGGGUAGAGCAUUUG	42	16	16563.5	182.73	2911.75	120.01	experimental
1288	he_46408	GAGAAAGCUCAUAAGAACUGCUAACU	42	17	26713.5	232.705	7293.33	162.394	experimental
1289	he_13183	UCAGAGAGCUAUCUUAAGAGCAAGAAA	42	18	211.657	17.1012	34.4074	3.06331	experimental
1290	he_46244	GAGUCACAGUCCGAUGA	42	19	199.972	11.3759	32.9259	3.53012	experimental
1291	he_15138	AAGCCCGGAAGGUGGAGAUUGCAGUG	42	20	200.843	13.1733	34.7778	3.49722	experimental
1292	a2-PUC2MM-20B		42	21	219.574	13.4235	43.3148	3.6137	control	control_spike-calibration	LC Internal Use
1293	xbz_10532	GGAAAGCGUCGCGGU	42	22	3366.39	131.085	730.269	39.5556	experimental
1294	xbz_23158	GUUUGAUUGCUGUCGGAGCCA	42	23	217.704	15.2151	37.1481	4.46129	experimental
1295	xbz_12440	UCUGUGUCUGAAUCUGUUAG	42	24	192.046	13.4917	31.1574	3.58127	experimental
1296	he_38410	GGGGUUCCUGGGGAUGGGAUUU	42	25	706.648	37.0242	142.417	18.813	experimental
1297	xbz_4623	GGGGGUAUAGCUCAGUGGGUAGAGCAUUUG	42	26	15922.1	172.279	2675.18	68.5595	experimental
1298	he_46408	GAGAAAGCUCAUAAGAACUGCUAACU	42	27	26188.9	279.421	6910.78	79.0105	experimental
1299	he_13183	UCAGAGAGCUAUCUUAAGAGCAAGAAA	42	28	212.185	16.1316	30.75	2.5764	experimental
1300	he_46244	GAGUCACAGUCCGAUGA	42	29	207.5	17.491	33.1296	2.78209	experimental
1301	he_15138	AAGCCCGGAAGGUGGAGAUUGCAGUG	42	30	241.324	12.3529	33.8241	3.88582	experimental
1302	a2-PUC2MM-20B		42	31	224.481	19.1348	40.9537	6.06412	control	control_spike-calibration	LC Internal Use
1303	a3-PUC2PM-20B		43	1	41282.9	358.476	38054.6	1109.18	control	control_spike-calibration	LC Internal Use
1304	xbz_4815	CGGGGUUUUGAGGGCGAGAUGA	43	2	337.352	13.1279	56.6204	4.15521	experimental
1305	xbz_24446	CUGGAUUGUGGGGUAAGCUA	43	3	353.231	36.6761	43.6389	6.40014	experimental
1306	xbz_5256	AAGGUAUUUGAAAAACCAU	43	4	238.13	16.953	33.0278	3.90173	experimental
1307	he_49595	CCGCACUGUGGGUACUUGCUGC	43	5	574.611	37.9419	363.731	36.9846	experimental
1308	xbz_5246	GCGUUGGUGGUAUAGUGGUAAGCAUAGCUG	43	6	27890.4	401.425	3438.75	159.613	experimental
1309	he_46690	UAAUCUGUCACUCUGAAGGCUUUGUUAU	43	7	230.241	11.1363	31.0833	3.43464	experimental
1310	he_13555	GGGGAUGUAGCUCAGUGGUAGAGCGCG	43	8	11048.6	195.895	1121.78	55.9257	experimental
1311	he_36597	AGCUACAUUUGGCUGGGUCU	43	9	2707.29	112.751	92.5278	11.0871	experimental
1312	he_15155	AAAAUAGAUCUGACUUAAGAACUAAA	43	10	233.139	10.795	34.2685	2.41725	experimental
1313	a3-PUC2PM-20B		43	11	38286.5	505.292	32725.4	283.167	control	control_spike-calibration	LC Internal Use
1314	xbz_4815	CGGGGUUUUGAGGGCGAGAUGA	43	12	290.759	12.1531	49.7778	5.09046	experimental
1315	xbz_24446	CUGGAUUGUGGGGUAAGCUA	43	13	312.481	24.3669	44.0833	4.65065	experimental
1316	xbz_5256	AAGGUAUUUGAAAAACCAU	43	14	197.685	10.3325	32.6481	2.90122	experimental
1317	he_49595	CCGCACUGUGGGUACUUGCUGC	43	15	483.296	28.3005	415.935	35.4966	experimental
1318	xbz_5246	GCGUUGGUGGUAUAGUGGUAAGCAUAGCUG	43	16	24510.6	284.271	3511.22	80.1903	experimental
1319	he_46690	UAAUCUGUCACUCUGAAGGCUUUGUUAU	43	17	208.12	15.9466	35.3796	2.21177	experimental
1320	he_13555	GGGGAUGUAGCUCAGUGGUAGAGCGCG	43	18	9980.86	232.606	994.259	43.905	experimental
1321	he_36597	AGCUACAUUUGGCUGGGUCU	43	19	2187.32	91.614	80.5093	14.8151	experimental
1322	he_15155	AAAAUAGAUCUGACUUAAGAACUAAA	43	20	181.648	14.5733	29.8611	2.9654	experimental
1323	a3-PUC2PM-20B		43	21	33199	454.538	32886	268.879	control	control_spike-calibration	LC Internal Use
1324	xbz_4815	CGGGGUUUUGAGGGCGAGAUGA	43	22	263.722	24.3145	46.0833	4.76578	experimental
1325	xbz_24446	CUGGAUUGUGGGGUAAGCUA	43	23	291.5	23.6582	43.0556	4.53199	experimental
1326	xbz_5256	AAGGUAUUUGAAAAACCAU	43	24	188.028	14.2241	31.4722	2.05739	experimental
1327	he_49595	CCGCACUGUGGGUACUUGCUGC	43	25	446.222	35.3726	340.241	24.5402	experimental
1328	xbz_5246	GCGUUGGUGGUAUAGUGGUAAGCAUAGCUG	43	26	23268.4	482.199	3060.43	59.6913	experimental
1329	he_46690	UAAUCUGUCACUCUGAAGGCUUUGUUAU	43	27	190.981	10.2847	30.3704	1.2043	experimental
1330	he_13555	GGGGAUGUAGCUCAGUGGUAGAGCGCG	43	28	10045.2	141.005	1012.62	40.8857	experimental
1331	he_36597	AGCUACAUUUGGCUGGGUCU	43	29	2449.01	185.273	85.7222	10.6603	experimental
1332	he_15155	AAAAUAGAUCUGACUUAAGAACUAAA	43	30	202.324	9.84442	29.7593	2.26254	experimental
1333	a3-PUC2PM-20B		43	31	37025.9	461.67	37061.2	415.202	control	control_spike-calibration	LC Internal Use
1334	a3-PUC2MM-20B		44	1	272.12	14.5343	41.9352	2.91074	control	control_spike-calibration	LC Internal Use
1335	xbz_865	AAAUAUAUUGUUGACUUGU	44	2	235.639	8.83225	32.3056	2.28959	experimental
1336	xbz_15773	CUCACUGAACAAUGAAUGCAA	44	3	250.139	6.98391	32.6667	3.83296	experimental
1337	xbz_14453	CAUACUUGUUGGAGUA	44	4	234.241	17.5993	32.6389	4.28747	experimental
1338	he_36724	AAACCGUUACCAUUACUGAGUU	44	5	220.991	10.0499	29.787	2.53223	experimental
1339	xbz_7200	GGGGAUGUAGCUCAGUGGUAGAGCGCG	44	6	11350.8	302.187	1033.87	58.9613	experimental
1340	he_46744	AGAACGUGUGGAAAACUAAUGACUGAGCA	44	7	346.5	18.3214	3312.64	134.153	experimental
1341	he_13758	AGGGGUAUAGCUCAGUGGGGAGCAUUUG	44	8	20838.3	309.284	3760.38	118.864	experimental
1342	he_44348	GCGCUGAGGCUCUCACGCCUGUGAUGGA	44	9	233.917	16.721	34.6852	5.83359	experimental
1343	he_15187	AAGGAUUAGGAAAUAGAUUUUAACAA	44	10	217.204	6.18826	31.1111	1.61958	experimental
1344	a3-PUC2MM-20B		44	11	234.287	14.9398	41.8889	7.05828	control	control_spike-calibration	LC Internal Use
1345	xbz_865	AAAUAUAUUGUUGACUUGU	44	12	196.852	8.65844	28.3704	2.90212	experimental
1346	xbz_15773	CUCACUGAACAAUGAAUGCAA	44	13	195.491	7.86391	29.2037	1.7655	experimental
1347	xbz_14453	CAUACUUGUUGGAGUA	44	14	212.778	11.8198	30.5093	2.9781	experimental
1348	he_36724	AAACCGUUACCAUUACUGAGUU	44	15	194.185	9.96269	35.0741	2.323	experimental
1349	xbz_7200	GGGGAUGUAGCUCAGUGGUAGAGCGCG	44	16	10139.3	170.107	1115.72	76.3925	experimental
1350	he_46744	AGAACGUGUGGAAAACUAAUGACUGAGCA	44	17	297.472	24.5389	2847.19	86.8102	experimental
1351	he_13758	AGGGGUAUAGCUCAGUGGGGAGCAUUUG	44	18	18088.4	296.697	3302.03	137.111	experimental
1352	he_44348	GCGCUGAGGCUCUCACGCCUGUGAUGGA	44	19	293.694	394.644	34.7963	8.0312	experimental
1353	he_15187	AAGGAUUAGGAAAUAGAUUUUAACAA	44	20	175.833	12.2004	29.9907	2.07565	experimental
1354	a3-PUC2MM-20B		44	21	221.75	15.6505	42.0648	6.02374	control	control_spike-calibration	LC Internal Use
1355	xbz_865	AAAUAUAUUGUUGACUUGU	44	22	181.5	10.7551	30.6296	1.68884	experimental
1356	xbz_15773	CUCACUGAACAAUGAAUGCAA	44	23	198.556	10.2231	33.4444	1.93025	experimental
1357	xbz_14453	CAUACUUGUUGGAGUA	44	24	183.472	11.2586	31.8611	3.40549	experimental
1358	he_36724	AAACCGUUACCAUUACUGAGUU	44	25	187.435	10.0143	28.6759	3.12012	experimental
1359	xbz_7200	GGGGAUGUAGCUCAGUGGUAGAGCGCG	44	26	9792.5	193.574	963.509	51.6102	experimental
1360	he_46744	AGAACGUGUGGAAAACUAAUGACUGAGCA	44	27	292.157	21.4634	2831.63	84.5407	experimental
1361	he_13758	AGGGGUAUAGCUCAGUGGGGAGCAUUUG	44	28	18584.6	196.587	3284.14	117.08	experimental
1362	he_44348	GCGCUGAGGCUCUCACGCCUGUGAUGGA	44	29	202.13	10.5122	33.2037	3.74605	experimental
1363	he_15187	AAGGAUUAGGAAAUAGAUUUUAACAA	44	30	192.065	6.71485	28.1111	2.64869	experimental
1364	a3-PUC2MM-20B		44	31	228.019	14.7521	37.75	5.80384	control	control_spike-calibration	LC Internal Use
1365	a-PUC2PM		45	1	36857.3	341.311	46857	1665.95	control	control_spike-calibration	LC Internal Use
1366	xbz_785	UUGCUUAUAGACUGAUUUUGA	45	2	253.046	20.003	33.8519	2.37122	experimental
1367	xbz_15823	UAGCACCAUUUGAAAUCAGUGUUU	45	3	1077.01	124.048	10188.4	326.925	experimental
1368	xbz_8050	UGAGGUAGUAGGUUGUAUGGUU	45	4	19563.5	677.836	19795.5	525.525	experimental
1369	he_38783	GCAAAGCACACGGCCUGCAGAGAGG	45	5	311.537	20.138	110.954	17.2715	experimental
1370	xbz_10910	UUACUUCGAGUACAUUGUAACCACCU	45	6	316.407	26.0636	34.2963	3.52099	experimental
1371	he_46823	UCAUCAGUAUAGUGGUGAGUAUCCCC	45	7	34245.4	741.073	6794.25	136.193	experimental
1372	he_13856	CCUCCCACUGCUAAAUUUGACUGGCUU	45	8	23502.9	378.035	603.028	38.475	experimental
1373	he_29243	UGGAAGACUAUUGUUGUUCUUA	45	9	229.843	10.5681	34.1111	3.92769	experimental
1374	he_15199	AUAUUGAACUUGAAAAUAAAAAAUUA	45	10	229.972	19.1455	34.2407	2.95407	experimental
1375	a-PUC2PM		45	11	33283	519.161	39329.5	324.728	control	control_spike-calibration	LC Internal Use
1376	xbz_785	UUGCUUAUAGACUGAUUUUGA	45	12	215.917	24.9591	32.5463	3.41077	experimental
1377	xbz_15823	UAGCACCAUUUGAAAUCAGUGUUU	45	13	827.787	61.8829	8905.2	305.805	experimental
1378	xbz_8050	UGAGGUAGUAGGUUGUAUGGUU	45	14	16588.8	454.426	19390.7	559.663	experimental
1379	he_38783	GCAAAGCACACGGCCUGCAGAGAGG	45	15	284.861	28.673	104.463	13.1877	experimental
1380	xbz_10910	UUACUUCGAGUACAUUGUAACCACCU	45	16	308.546	24.4492	38.8611	3.48416	experimental
1381	he_46823	UCAUCAGUAUAGUGGUGAGUAUCCCC	45	17	30879	473.683	6365.66	206.19	experimental
1382	he_13856	CCUCCCACUGCUAAAUUUGACUGGCUU	45	18	20782	314.362	491.315	35.0478	experimental
1383	he_29243	UGGAAGACUAUUGUUGUUCUUA	45	19	180.361	12.6502	31.3796	2.77411	experimental
1384	he_15199	AUAUUGAACUUGAAAAUAAAAAAUUA	45	20	183.38	20.0372	30.5926	3.26705	experimental
1385	a-PUC2PM		45	21	29210.1	421.152	40248.7	644.298	control	control_spike-calibration	LC Internal Use
1386	xbz_785	UUGCUUAUAGACUGAUUUUGA	45	22	201.602	12.1755	33.9074	2.743	experimental
1387	xbz_15823	UAGCACCAUUUGAAAUCAGUGUUU	45	23	840.759	83.6591	8155.65	238.301	experimental
1388	xbz_8050	UGAGGUAGUAGGUUGUAUGGUU	45	24	15929.8	291.543	17151.9	342.803	experimental
1389	he_38783	GCAAAGCACACGGCCUGCAGAGAGG	45	25	289.685	23.3789	100.333	10.3463	experimental
1390	xbz_10910	UUACUUCGAGUACAUUGUAACCACCU	45	26	240.611	16.6755	30.9074	3.86583	experimental
1391	he_46823	UCAUCAGUAUAGUGGUGAGUAUCCCC	45	27	29777.6	443.92	5940.48	141.047	experimental
1392	he_13856	CCUCCCACUGCUAAAUUUGACUGGCUU	45	28	21039.3	339.799	517.648	45.9018	experimental
1393	he_29243	UGGAAGACUAUUGUUGUUCUUA	45	29	207.852	9.63135	30.3611	2.5115	experimental
1394	he_15199	AUAUUGAACUUGAAAAUAAAAAAUUA	45	30	202.759	11.4262	32.3056	3.72026	experimental
1395	a-PUC2PM		45	31	32730.6	532.887	44625.7	810.744	control	control_spike-calibration	LC Internal Use
1396	a-PUC2MM2d		46	1	595.083	52.5083	414.75	52.3971	control	control_spike-calibration	LC Internal Use
1397	xbz_8958	GGCCAGUUGGUGAAGCAGUU	46	2	240.972	12.8474	35.5741	3.92739	experimental
1398	xbz_26760	AGUUGGUUACAGCUUGGUGU	46	3	248.074	18.0185	34.1481	4.96307	experimental
1399	xbz_9344	CACUAGAUUGUGAGCUCCUGGA	46	4	526.769	49.6565	261.222	26.1446	experimental
1400	he_49836	UAGCACCAUCUGAAAUCGGUUA	46	5	11633.6	277.46	23769.9	228.928	experimental
1401	xbz_11316	GUUUCCGUAGUGUAGUGGUUAUCACGUUU	46	6	17198.2	285.435	1407.35	69.338	experimental
1402	he_47085	GGGGGUAUAGCUCAGGGGUAGAGCAUCG	46	7	25941.8	450.039	5202.85	178.5	experimental
1403	he_13939	GCCCCAGUUGCCUAAUGGAUAAGGCACUG	46	8	556.361	30.8722	147.944	19.6001	experimental
1404	he_52022	CGUCCCGCUCCGGGGACAGUG	46	9	1565.48	120.851	313.648	42.8321	experimental
1405	he_15200	UACUAAACUCACAAGCGUACCUCCUAUUU	46	10	234.759	18.602	28.8426	2.58378	experimental
1406	a-PUC2MM2d		46	11	617.454	46.7588	445.463	61.939	control	control_spike-calibration	LC Internal Use
1407	xbz_8958	GGCCAGUUGGUGAAGCAGUU	46	12	228.37	25.5634	36.1944	3.38346	experimental
1408	xbz_26760	AGUUGGUUACAGCUUGGUGU	46	13	194.38	14.4531	29.8333	2.82678	experimental
1409	xbz_9344	CACUAGAUUGUGAGCUCCUGGA	46	14	448.861	26.7206	258.528	22.1581	experimental
1410	he_49836	UAGCACCAUCUGAAAUCGGUUA	46	15	9880.46	121.808	26138.1	285.451	experimental
1411	xbz_11316	GUUUCCGUAGUGUAGUGGUUAUCACGUUU	46	16	15069	179.82	1477.94	60.986	experimental
1412	he_47085	GGGGGUAUAGCUCAGGGGUAGAGCAUCG	46	17	23359.9	230.855	5094.57	163.874	experimental
1413	he_13939	GCCCCAGUUGCCUAAUGGAUAAGGCACUG	46	18	465.694	34.3809	127.481	15.23	experimental
1414	he_52022	CGUCCCGCUCCGGGGACAGUG	46	19	1303.51	113.43	249.167	25.4824	experimental
1415	he_15200	UACUAAACUCACAAGCGUACCUCCUAUUU	46	20	183.907	16.0155	28.4259	3.07903	experimental
1416	a-PUC2MM2d		46	21	525.019	36.0158	462.611	40.6643	control	control_spike-calibration	LC Internal Use
1417	xbz_8958	GGCCAGUUGGUGAAGCAGUU	46	22	205.407	16.236	33.7685	2.3822	experimental
1418	xbz_26760	AGUUGGUUACAGCUUGGUGU	46	23	199.546	16.7066	35.0278	2.58123	experimental
1419	xbz_9344	CACUAGAUUGUGAGCUCCUGGA	46	24	418.25	40.0994	246.806	28.5685	experimental
1420	he_49836	UAGCACCAUCUGAAAUCGGUUA	46	25	9257.81	196.093	22784.6	228.402	experimental
1421	xbz_11316	GUUUCCGUAGUGUAGUGGUUAUCACGUUU	46	26	14106.5	337.004	1264.04	53.2058	experimental
1422	he_47085	GGGGGUAUAGCUCAGGGGUAGAGCAUCG	46	27	22566.1	235.652	4649.71	116.684	experimental
1423	he_13939	GCCCCAGUUGCCUAAUGGAUAAGGCACUG	46	28	471.028	34.004	129.944	18.7032	experimental
1424	he_52022	CGUCCCGCUCCGGGGACAGUG	46	29	1418.56	97.6235	272.583	16.9182	experimental
1425	he_15200	UACUAAACUCACAAGCGUACCUCCUAUUU	46	30	205.269	10.3857	29.713	1.88477	experimental
1426	a-PUC2MM2d		46	31	670.019	72.0115	588.63	54.8796	control	control_spike-calibration	LC Internal Use
1427	Ctr01-2P		47	1	10332.5	320.896	13308.5	329.843	control	control_spike-calibration	LC Internal Use
1428	xbz_10964	CAGGGCGCACCACCGGCCCG	47	2	2321.78	115.894	205.241	16.9931	experimental
1429	xbz_21134	CUGGAGAUAUGGAAGAGCUGUGU	47	3	249.528	13.4619	33.5093	4.62317	experimental
1430	xbz_3733	UAAGGUGCAUCUAGUGCAGAU	47	4	477.157	39.8291	453.074	37.8138	experimental
1431	he_27523	CAAAGAAUUCUCCUUUUGGGCUU	47	5	333.583	27.8357	297.639	31.2728	experimental
1432	xbz_12781	GGGGGCAUAGCUCAGUGGUAGAGCAUUU	47	6	12802.1	320.269	1546.87	94.7096	experimental
1433	he_47213	GUUUCCGUAGUGUAGUGGUCAUCACGUUC	47	7	22013.8	329.972	3185.15	180.277	experimental
1434	he_14017	CCCCUGGUGGUCUAGUGGUUAGGAUUCGG	47	8	46461.6	311.81	8938.65	303.725	experimental
1435	he_53549	GGGAGCCAGGAAGUAUUGAUGUU	47	9	311.787	15.1867	55.787	5.77952	experimental
1436	he_15201	CAAACAGAUUAAGACAUGGGAGGUAUG	47	10	238.685	11.5067	32.9074	2.93078	experimental
1437	Ctr01-2P		47	11	9284.12	179.183	11891.6	253.613	control	control_spike-calibration	LC Internal Use
1438	xbz_10964	CAGGGCGCACCACCGGCCCG	47	12	2006.59	121.557	198.046	23.3672	experimental
1439	xbz_21134	CUGGAGAUAUGGAAGAGCUGUGU	47	13	198.787	11.3985	29.2222	3.36095	experimental
1440	xbz_3733	UAAGGUGCAUCUAGUGCAGAU	47	14	383.639	38.3558	474.824	35.6328	experimental
1441	he_27523	CAAAGAAUUCUCCUUUUGGGCUU	47	15	302.037	19.1974	317.954	35.0066	experimental
1442	xbz_12781	GGGGGCAUAGCUCAGUGGUAGAGCAUUU	47	16	11280.8	259.208	1797.71	63.9794	experimental
1443	he_47213	GUUUCCGUAGUGUAGUGGUCAUCACGUUC	47	17	19551.3	212.141	3109.75	96.0289	experimental
1444	he_14017	CCCCUGGUGGUCUAGUGGUUAGGAUUCGG	47	18	39893.1	359.844	7907.08	182.51	experimental
1445	he_53549	GGGAGCCAGGAAGUAUUGAUGUU	47	19	248.074	16.5494	46.0556	5.28767	experimental
1446	he_15201	CAAACAGAUUAAGACAUGGGAGGUAUG	47	20	193.222	15.5938	31.9259	4.01098	experimental
1447	Ctr01-2P		47	21	8295.31	178.846	11621.5	192.593	control	control_spike-calibration	LC Internal Use
1448	xbz_10964	CAGGGCGCACCACCGGCCCG	47	22	1889.36	84.7766	181.778	26.0712	experimental
1449	xbz_21134	CUGGAGAUAUGGAAGAGCUGUGU	47	23	199.463	10.782	32.2315	2.08513	experimental
1450	xbz_3733	UAAGGUGCAUCUAGUGCAGAU	47	24	367.593	34.0881	389.833	31.4082	experimental
1451	he_27523	CAAAGAAUUCUCCUUUUGGGCUU	47	25	287.454	23.8858	291.12	31.1561	experimental
1452	xbz_12781	GGGGGCAUAGCUCAGUGGUAGAGCAUUU	47	26	11022.5	284.628	1584.9	92.1596	experimental
1453	he_47213	GUUUCCGUAGUGUAGUGGUCAUCACGUUC	47	27	19109.8	458.492	2845.74	105.994	experimental
1454	he_14017	CCCCUGGUGGUCUAGUGGUUAGGAUUCGG	47	28	40687.3	302.738	7715.44	177.821	experimental
1455	he_53549	GGGAGCCAGGAAGUAUUGAUGUU	47	29	248.213	16.4038	57.6019	9.70012	experimental
1456	he_15201	CAAACAGAUUAAGACAUGGGAGGUAUG	47	30	218.361	16.1537	31.6667	2.6791	experimental
1457	Ctr01-2P		47	31	9333.25	326.479	13096.6	332.177	control	control_spike-calibration	LC Internal Use
1458	Ctr01-2M05		48	1	237.426	19.3542	33.3148	2.65333	control	control_spike-calibration	LC Internal Use
1459	xbz_13756	AGAGGUAGUAGGUUGCAUAGUU	48	2	18084	400.406	16051.9	531.897	experimental
1460	xbz_23885	CGGGUUGUGGGCAUUCU	48	3	256.917	17.8389	36.6759	5.18954	experimental
1461	xbz_6871	AUAGGUAUGGGACAAAUUUA	48	4	237.37	9.73921	33.2593	2.79977	experimental
1462	he_53133	UGAGGUAGUAGAUUGUAUAGUUU	48	5	16629.4	294.801	13770.6	259.975	experimental
1463	xbz_14113	UGGUAUAUAGUUUAAACAAAACGAAUG	48	6	1623.9	97.1224	43.3333	6.89846	experimental
1464	he_47479	GGGGAAUUAGCUCAAAUGGUAGAGCGCUC	48	7	2435.16	118.9	246.917	23.563	experimental
1465	he_14371	GAUGAUGAUGAGAAGCCUUUUGCUGAGC	48	8	244.991	14.215	38.537	3.89446	experimental
1466	he_34409	UUCUGUGAUGAAAAUGCUGAAG	48	9	236.593	10.5139	32.7593	2.94774	experimental
1467	he_52822	CAGAGAAUAGUUUAAAUUAGAAUCUUA	48	10	223.824	11.3778	34.6852	2.84046	experimental
1468	Ctr01-2M05		48	11	214.093	16.4132	29.1111	2.21859	control	control_spike-calibration	LC Internal Use
1469	xbz_13756	AGAGGUAGUAGGUUGCAUAGUU	48	12	15507.5	309.52	15306	467.545	experimental
1470	xbz_23885	CGGGUUGUGGGCAUUCU	48	13	208.731	16.5826	30.8611	3.33898	experimental
1471	xbz_6871	AUAGGUAUGGGACAAAUUUA	48	14	196.12	12.0805	31.6204	2.43693	experimental
1472	he_53133	UGAGGUAGUAGAUUGUAUAGUUU	48	15	13979.3	305.171	15231.9	353.572	experimental
1473	xbz_14113	UGGUAUAUAGUUUAAACAAAACGAAUG	48	16	1516.59	117.081	55.1944	5.2355	experimental
1474	he_47479	GGGGAAUUAGCUCAAAUGGUAGAGCGCUC	48	17	2289.69	107.449	266.398	28.7578	experimental
1475	he_14371	GAUGAUGAUGAGAAGCCUUUUGCUGAGC	48	18	200.324	8.26413	37.7407	3.4624	experimental
1476	he_34409	UUCUGUGAUGAAAAUGCUGAAG	48	19	190.657	13.0657	32.8241	3.06573	experimental
1477	he_52822	CAGAGAAUAGUUUAAAUUAGAAUCUUA	48	20	182.852	16.7604	31.7407	3.06433	experimental
1478	Ctr01-2M05		48	21	180.213	11.6282	31.4907	3.13406	control	control_spike-calibration	LC Internal Use
1479	xbz_13756	AGAGGUAGUAGGUUGCAUAGUU	48	22	14548.5	308.558	15145.6	238.034	experimental
1480	xbz_23885	CGGGUUGUGGGCAUUCU	48	23	196.324	11.0156	36.8333	4.38455	experimental
1481	xbz_6871	AUAGGUAUGGGACAAAUUUA	48	24	190.778	9.86292	30.0556	2.89645	experimental
1482	he_53133	UGAGGUAGUAGAUUGUAUAGUUU	48	25	13365.8	192.11	13524.8	260.158	experimental
1483	xbz_14113	UGGUAUAUAGUUUAAACAAAACGAAUG	48	26	1498.16	99.0386	47.8241	5.92291	experimental
1484	he_47479	GGGGAAUUAGCUCAAAUGGUAGAGCGCUC	48	27	2304.12	122	241.259	24.6366	experimental
1485	he_14371	GAUGAUGAUGAGAAGCCUUUUGCUGAGC	48	28	194.056	10.366	34.1481	4.05295	experimental
1486	he_34409	UUCUGUGAUGAAAAUGCUGAAG	48	29	210.12	9.46091	30.9259	2.50496	experimental
1487	he_52822	CAGAGAAUAGUUUAAAUUAGAAUCUUA	48	30	210.704	13.6965	31.2222	2.92055	experimental
1488	Ctr01-2M05		48	31	197.63	16.4945	28.8148	2.85522	control	control_spike-calibration	LC Internal Use
1489	Ctr01-2M10		49	1	251.278	18.7167	33.0185	3.66846	control	control_spike-calibration	LC Internal Use
1490	xbz_3606	UAAUUUCAUCAUCCUCAGUCA	49	2	247.157	12.2132	31.5278	3.53476	experimental
1491	xbz_21086	AGGGCUUAGCUGCUUGUGAGCA	49	3	728.75	36.172	67.9907	9.59896	experimental
1492	xbz_3197	UAGUUUGAUUACUAGCACUUGU	49	4	248.509	12.74	32.25	2.54355	experimental
1493	he_31641	UGAGGUAGUAGGUUGUAUAGUUUA	49	5	18340.6	213.464	17268.7	328.554	experimental
1494	xbz_14128	AUUGUGAAUCUGACAACAGAGGCUUA	49	6	18374.8	258.322	1875.19	87.6665	experimental
1495	he_47496	GCUUCUGUAGUGUAGUGGUUAUCACGUUC	49	7	12413.7	292.152	680.528	47.45	experimental
1496	he_14386	AUCACUGAUGUCUCCAUGUCUCUGAGCAA	49	8	463.778	38.0598	4441.74	132.804	experimental
1497	he_42208	GGAGGAACCUUGGAGCUUCGGC	49	9	265.028	18.8394	41.2315	6.44547	experimental
1498	he_52722	AGCUCCGAGGUGAUUUUCAUAUUGAA	49	10	312.556	31.4676	33.4815	1.95501	experimental
1499	Ctr01-2M10		49	11	218.222	19.2637	33.1296	5.28813	control	control_spike-calibration	LC Internal Use
1500	xbz_3606	UAAUUUCAUCAUCCUCAGUCA	49	12	214.194	10.1286	33.5463	3.16932	experimental
1501	xbz_21086	AGGGCUUAGCUGCUUGUGAGCA	49	13	568.75	62.3906	56.0093	13.1302	experimental
1502	xbz_3197	UAGUUUGAUUACUAGCACUUGU	49	14	217.12	12.2526	32.6944	2.52634	experimental
1503	he_31641	UGAGGUAGUAGGUUGUAUAGUUUA	49	15	15642.9	281.03	18578.4	359.417	experimental
1504	xbz_14128	AUUGUGAAUCUGACAACAGAGGCUUA	49	16	16124	228.324	1988.62	77.4019	experimental
1505	he_47496	GCUUCUGUAGUGUAGUGGUUAUCACGUUC	49	17	11084.4	212.876	684.806	37.8602	experimental
1506	he_14386	AUCACUGAUGUCUCCAUGUCUCUGAGCAA	49	18	431.333	34.7081	4046.3	108.027	experimental
1507	he_42208	GGAGGAACCUUGGAGCUUCGGC	49	19	190.333	16.3038	33.5833	4.6707	experimental
1508	he_52722	AGCUCCGAGGUGAUUUUCAUAUUGAA	49	20	261.861	24.0566	31	3.50434	experimental
1509	Ctr01-2M10		49	21	181.889	8.94984	32.4722	3.01851	control	control_spike-calibration	LC Internal Use
1510	xbz_3606	UAAUUUCAUCAUCCUCAGUCA	49	22	195.009	16.5125	31.2222	2.46217	experimental
1511	xbz_21086	AGGGCUUAGCUGCUUGUGAGCA	49	23	531.398	31.5381	64.6759	8.57385	experimental
1512	xbz_3197	UAGUUUGAUUACUAGCACUUGU	49	24	185.222	16.2902	31.1296	3.57325	experimental
1513	he_31641	UGAGGUAGUAGGUUGUAUAGUUUA	49	25	15195	276.266	16408.9	284.3	experimental
1514	xbz_14128	AUUGUGAAUCUGACAACAGAGGCUUA	49	26	15242.9	357.378	1722.06	124.095	experimental
1515	he_47496	GCUUCUGUAGUGUAGUGGUUAUCACGUUC	49	27	10739.6	227.088	639.917	44.5671	experimental
1516	he_14386	AUCACUGAUGUCUCCAUGUCUCUGAGCAA	49	28	414.898	31.3437	3860.01	51.5115	experimental
1517	he_42208	GGAGGAACCUUGGAGCUUCGGC	49	29	219.787	27.1228	36.1296	6.35859	experimental
1518	he_52722	AGCUCCGAGGUGAUUUUCAUAUUGAA	49	30	312.5	19.6676	32.1852	3.16271	experimental
1519	Ctr01-2M10		49	31	193.444	15.177	29.2037	3.10188	control	control_spike-calibration	LC Internal Use
1520	Ctr02-2P		50	1	270.583	25.7352	64.25	7.22033	control	control_spike-calibration	LC Internal Use
1521	xbz_11312	AUAACAUUGUAAAGCGCUUCUU	50	2	249.593	12.5386	31.1852	3.07279	experimental
1522	xbz_29532	CAAGUCACUAGUGGUUCCGUUU	50	3	3455.61	136.79	4182.93	177.412	experimental
1523	xbz_2993	UCAGUGCAUCACAGAACUUUGU	50	4	348.306	39.5308	294.231	39.7197	experimental
1524	he_28712	ACCAUCGACCGUUGAUUGUACC	50	5	316.046	19.6613	75.8148	10.3465	experimental
1525	xbz_14675	GCCCUGUGGUCUAGUGGUUAGGAUUCUG	50	6	36527.7	572.644	3889.53	140.296	experimental
1526	he_47498	GCCUGGGUAGCUCAGUCGGUAGAGCAUCA	50	7	8579.38	339.6	1284.16	60.3742	experimental
1527	he_14393	GGAGGUGAUGAACUGUCUGAGCCUGACC	50	8	285.722	17.4612	759.444	49.8111	experimental
1528	he_4491	CUUUGCACGCGUGGGUUCGAAUCCCA	50	9	520.713	41.5784	64.8056	6.89231	experimental
1529	he_25690	GUUAAGAUGGCAGAGCCCGGUAAUCG	50	10	32592	331.28	9069.36	156.772	experimental
1530	Ctr02-2P		50	11	223.074	11.3867	59.5278	11.7198	control	control_spike-calibration	LC Internal Use
1531	xbz_11312	AUAACAUUGUAAAGCGCUUCUU	50	12	217.972	11.1786	31.0463	2.96202	experimental
1532	xbz_29532	CAAGUCACUAGUGGUUCCGUUU	50	13	2769.95	113.65	3447.94	205.791	experimental
1533	xbz_2993	UCAGUGCAUCACAGAACUUUGU	50	14	279.685	30.7664	317.537	39.0914	experimental
1534	he_28712	ACCAUCGACCGUUGAUUGUACC	50	15	285.741	28.4291	77.037	12.1939	experimental
1535	xbz_14675	GCCCUGUGGUCUAGUGGUUAGGAUUCUG	50	16	31442	290.787	4191.81	120.877	experimental
1536	he_47498	GCCUGGGUAGCUCAGUCGGUAGAGCAUCA	50	17	7711.61	215.116	1342.84	60.2238	experimental
1537	he_14393	GGAGGUGAUGAACUGUCUGAGCCUGACC	50	18	223.435	11.9448	666.657	40.775	experimental
1538	he_4491	CUUUGCACGCGUGGGUUCGAAUCCCA	50	19	407.102	36.5319	53.25	13.5833	experimental
1539	he_25690	GUUAAGAUGGCAGAGCCCGGUAAUCG	50	20	27520	529.447	8631.88	174.677	experimental
1540	Ctr02-2P		50	21	201.157	14.7339	58.1111	7.35525	control	control_spike-calibration	LC Internal Use
1541	xbz_11312	AUAACAUUGUAAAGCGCUUCUU	50	22	192.583	10.0104	31.1204	3.57226	experimental
1542	xbz_29532	CAAGUCACUAGUGGUUCCGUUU	50	23	2762.78	105.193	3390.59	146.461	experimental
1543	xbz_2993	UCAGUGCAUCACAGAACUUUGU	50	24	270.139	28.8309	276.815	31.8229	experimental
1544	he_28712	ACCAUCGACCGUUGAUUGUACC	50	25	262.426	20.5636	73.6019	11.9711	experimental
1545	xbz_14675	GCCCUGUGGUCUAGUGGUUAGGAUUCUG	50	26	29408.1	371.677	3659.9	139.916	experimental
1546	he_47498	GCCUGGGUAGCUCAGUCGGUAGAGCAUCA	50	27	7399.79	170.136	1210.22	74.0074	experimental
1547	he_14393	GGAGGUGAUGAACUGUCUGAGCCUGACC	50	28	216.639	18.7375	610.444	47.0083	experimental
1548	he_4491	CUUUGCACGCGUGGGUUCGAAUCCCA	50	29	491.231	51.214	61.5463	7.50873	experimental
1549	he_25690	GUUAAGAUGGCAGAGCCCGGUAAUCG	50	30	30086.2	372.26	9401.76	144.402	experimental
1550	Ctr02-2P		50	31	221.519	14.5522	67.3241	10.4781	control	control_spike-calibration	LC Internal Use
1551	Ctr02-2M05		51	1	243.259	21.9747	32.0926	3.02493	control	control_spike-calibration	LC Internal Use
1552	xbz_7667	AGCAGCAUUGUACAGGGCUAUGAAA	51	2	6278.14	159.325	11751.5	309.941	experimental
1553	xbz_29172	AGCUACAUUGUCUGCUGGGUUU	51	3	15531.9	363.838	26423.6	441.251	experimental
1554	xbz_8237	AAAGGAAAAGUUUCUUUGCU	51	4	251.639	10.4823	35.1759	3.29777	experimental
1555	he_36376	AAGCUGCCAGUUGAAGAACUGU	51	5	2035.26	58.4831	8921.17	106.268	experimental
1556	he_27079	UUCACUGAUGAGAGCAUUGUUCUGAGC	51	6	255.704	16.1107	383.806	33.5694	experimental
1557	he_47500	CUCGAAGAUAUAUGUAUAUAUCCUCU	51	7	226.546	19.1679	29.0741	2.60734	experimental
1558	he_14400	UUCUCUGGCGCAAUGGAUAGCGCAUU	51	8	239.333	13.4776	34.0556	4.1846	experimental
1559	he_6837	ACUGCAUUAUGAGCACUUAAAGUA	51	9	236.25	12.9789	36.1667	4.06604	experimental
1560	he_25748	AACAGCUAUCCAUUGGUCUUAGGCCCCA	51	10	7308.47	168.476	1474.31	37.5899	experimental
1561	Ctr02-2M05		51	11	225.917	20.1639	32.6574	3.62793	control	control_spike-calibration	LC Internal Use
1562	xbz_7667	AGCAGCAUUGUACAGGGCUAUGAAA	51	12	5376.34	119.095	11108.6	337.513	experimental
1563	xbz_29172	AGCUACAUUGUCUGCUGGGUUU	51	13	12889.5	186.841	23251.8	710.848	experimental
1564	xbz_8237	AAAGGAAAAGUUUCUUUGCU	51	14	188.083	15.9445	30.8519	2.24156	experimental
1565	he_36376	AAGCUGCCAGUUGAAGAACUGU	51	15	1694.69	80.2221	9710.56	147.476	experimental
1566	he_27079	UUCACUGAUGAGAGCAUUGUUCUGAGC	51	16	234.139	16.2886	414.657	32.4072	experimental
1567	he_47500	CUCGAAGAUAUAUGUAUAUAUCCUCU	51	17	203.731	10.6373	34.7037	2.8719	experimental
1568	he_14400	UUCUCUGGCGCAAUGGAUAGCGCAUU	51	18	205.731	12.7665	35.5833	4.62243	experimental
1569	he_6837	ACUGCAUUAUGAGCACUUAAAGUA	51	19	190.167	10.6451	32.9815	4.48253	experimental
1570	he_25748	AACAGCUAUCCAUUGGUCUUAGGCCCCA	51	20	6436.6	222.075	1365.88	95.4036	experimental
1571	Ctr02-2M05		51	21	185.25	8.44457	31.9167	2.7245	control	control_spike-calibration	LC Internal Use
1572	xbz_7667	AGCAGCAUUGUACAGGGCUAUGAAA	51	22	5040.38	135.113	11069.4	157.67	experimental
1573	xbz_29172	AGCUACAUUGUCUGCUGGGUUU	51	23	12387	171.982	22331.9	390.38	experimental
1574	xbz_8237	AAAGGAAAAGUUUCUUUGCU	51	24	187.5	12.3557	32.287	2.8319	experimental
1575	he_36376	AAGCUGCCAGUUGAAGAACUGU	51	25	1757.24	65.3418	8509.71	188.612	experimental
1576	he_27079	UUCACUGAUGAGAGCAUUGUUCUGAGC	51	26	213.278	14.107	378.241	31.3324	experimental
1577	he_47500	CUCGAAGAUAUAUGUAUAUAUCCUCU	51	27	186.009	12.5434	29.0278	1.91139	experimental
1578	he_14400	UUCUCUGGCGCAAUGGAUAGCGCAUU	51	28	202.185	17.2887	28.3148	2.2157	experimental
1579	he_6837	ACUGCAUUAUGAGCACUUAAAGUA	51	29	203.12	9.10758	32.2037	3.60881	experimental
1580	he_25748	AACAGCUAUCCAUUGGUCUUAGGCCCCA	51	30	7221.56	234.342	1537.92	62.4307	experimental
1581	Ctr02-2M05		51	31	215.62	12.3627	29.9815	4.36422	control	control_spike-calibration	LC Internal Use
1582	Ctr02-2M10		52	1	250.972	19.967	29.213	2.30015	control	control_spike-calibration	LC Internal Use
1583	xbz_78	GGCUUGGUCUAGGGGUGUCAU	52	2	249.583	13.9419	34.1204	3.53809	experimental
1584	xbz_29477	CAAAACGUGAGGCGCUGCUAU	52	3	344.278	18.9233	67.8241	9.29559	experimental
1585	xbz_73	CGUUUCUUAGCAGGGCUU	52	4	268.093	14.5407	37.0278	4.06595	experimental
1586	he_37062	UACCCUGUAGAUCCGAAUUUGU	52	5	287.907	18.5208	53.2593	6.65627	experimental
1587	he_27218	CUUCUUACUACUGCACUUGACUAGUCU	52	6	11247.6	170.383	273.5	16.8886	experimental
1588	he_47505	GCCUGGAUAGCUCAGUCGGUAGAGCAUCAG	52	7	10622.4	273.148	2148.94	109.218	experimental
1589	he_15624	CGGGAUGCCUGGGAGUUGCGAUCUGCCCG	52	8	708.852	51.3747	386.565	34.5857	experimental
1590	he_11181	CAUGGUGAGGAUGGGGUCGGAGG	52	9	3696.89	131.467	155.796	18.7969	experimental
1591	he_25747	GAGAAAGCUCACAAGAACUGCUAACU	52	10	40762.8	355.391	15281	194.314	experimental
1592	Ctr02-2M10		52	11	230.222	14.694	34.4444	3.82645	control	control_spike-calibration	LC Internal Use
1593	xbz_78	GGCUUGGUCUAGGGGUGUCAU	52	12	229.148	19.3844	36.25	3.36592	experimental
1594	xbz_29477	CAAAACGUGAGGCGCUGCUAU	52	13	282.954	26.0712	61.3241	12.6586	experimental
1595	xbz_73	CGUUUCUUAGCAGGGCUU	52	14	218.028	8.50888	37.8519	4.24884	experimental
1596	he_37062	UACCCUGUAGAUCCGAAUUUGU	52	15	239.13	16.7461	47.2778	4.75932	experimental
1597	he_27218	CUUCUUACUACUGCACUUGACUAGUCU	52	16	9750.44	251.833	321.657	20.6598	experimental
1598	he_47505	GCCUGGAUAGCUCAGUCGGUAGAGCAUCAG	52	17	9322.88	199.722	2095.38	98.7396	experimental
1599	he_15624	CGGGAUGCCUGGGAGUUGCGAUCUGCCCG	52	18	649.667	34.5727	350.63	26.0386	experimental
1600	he_11181	CAUGGUGAGGAUGGGGUCGGAGG	52	19	2972.96	133.93	141.407	15.9333	experimental
1601	he_25747	GAGAAAGCUCACAAGAACUGCUAACU	52	20	34393.7	601.167	14590.2	230.514	experimental
1602	Ctr02-2M10		52	21	190.991	19.5135	32.2963	2.81272	control	control_spike-calibration	LC Internal Use
1603	xbz_78	GGCUUGGUCUAGGGGUGUCAU	52	22	208.185	11.9791	38.2963	6.79783	experimental
1604	xbz_29477	CAAAACGUGAGGCGCUGCUAU	52	23	284.731	22.9944	58.8704	7.66847	experimental
1605	xbz_73	CGUUUCUUAGCAGGGCUU	52	24	206.111	8.44701	35.1481	2.78452	experimental
1606	he_37062	UACCCUGUAGAUCCGAAUUUGU	52	25	216.731	8.98556	53.3519	5.92999	experimental
1607	he_27218	CUUCUUACUACUGCACUUGACUAGUCU	52	26	9299.9	340.754	274.065	22.5647	experimental
1608	he_47505	GCCUGGAUAGCUCAGUCGGUAGAGCAUCAG	52	27	8983.62	175.071	1850.1	73.8835	experimental
1609	he_15624	CGGGAUGCCUGGGAGUUGCGAUCUGCCCG	52	28	632.176	26.665	319.583	31.2629	experimental
1610	he_11181	CAUGGUGAGGAUGGGGUCGGAGG	52	29	3477.12	150.706	149.398	16.4345	experimental
1611	he_25747	GAGAAAGCUCACAAGAACUGCUAACU	52	30	38147.8	418.196	15715.5	213.37	experimental
1612	Ctr02-2M10		52	31	208.407	11.8771	30.7315	3.68783	control	control_spike-calibration	LC Internal Use
1613	Ctr03-2P		53	1	317.926	21.6289	144.528	15.4063	control	control_spike-calibration	LC Internal Use
1614	xbz_11894	UGAAUGAUUAAAGGUCUUGGGGC	53	2	6878.42	284.262	396.565	40.3543	experimental
1615	xbz_16514	AGCAGCAUUGUACAGGGCUAUC	53	3	7580.89	134.582	16087.2	258.697	experimental
1616	xbz_5186	AGGAAGGCAGCAGGCGC	53	4	21128.4	355.684	4749.43	195.051	experimental
1617	he_50188	UAGCUUGUCAGAUUAAUGUUGAUA	53	5	257.611	16.7694	34.6852	2.51964	experimental
1618	he_27706	GGGGGUAUAGCUCAGGUGGUAGAGCAUUUG	53	6	15172.2	301.953	2006.58	119.991	experimental
1619	he_47509	UCUCUAUUUGAACCAGAUAGGACUUUUG	53	7	232.417	9.44648	30.6111	2.78458	experimental
1620	he_15724	GGCUCGUUGGUCUAGGGGUAUGAUCCU	53	8	46247.3	471.085	21016.2	435.019	experimental
1621	he_5221	CUGGCUUUUUACCGGAAAGCCCC	53	9	269.185	12.8726	42.5278	5.59783	experimental
1622	he_25668	CACUGAAAAUGUUUAGACGGGCU	53	10	33384.8	424.458	5319.06	131.062	experimental
1623	Ctr03-2P		53	11	266.602	19.9429	151.139	15.4124	control	control_spike-calibration	LC Internal Use
1624	xbz_11894	UGAAUGAUUAAAGGUCUUGGGGC	53	12	5662.74	171.295	392.306	32.9748	experimental
1625	xbz_16514	AGCAGCAUUGUACAGGGCUAUC	53	13	6072.25	173.321	14026.9	246.231	experimental
1626	xbz_5186	AGGAAGGCAGCAGGCGC	53	14	17490.7	219.351	4384.25	195.429	experimental
1627	he_50188	UAGCUUGUCAGAUUAAUGUUGAUA	53	15	200.5	12.9178	29.8056	2.14632	experimental
1628	he_27706	GGGGGUAUAGCUCAGGUGGUAGAGCAUUUG	53	16	13135.3	298.399	2142.29	58.1231	experimental
1629	he_47509	UCUCUAUUUGAACCAGAUAGGACUUUUG	53	17	202.685	17.5923	34.9352	1.8559	experimental
1630	he_15724	GGCUCGUUGGUCUAGGGGUAUGAUCCU	53	18	39711.1	285.545	19318.2	450.443	experimental
1631	he_5221	CUGGCUUUUUACCGGAAAGCCCC	53	19	224.509	17.1047	37.8333	3.64935	experimental
1632	he_25668	CACUGAAAAUGUUUAGACGGGCU	53	20	28436.4	286.559	5010.84	154.022	experimental
1633	Ctr03-2P		53	21	230.528	15.2459	124.537	16.47	control	control_spike-calibration	LC Internal Use
1634	xbz_11894	UGAAUGAUUAAAGGUCUUGGGGC	53	22	5448.98	128.951	357.148	41.0049	experimental
1635	xbz_16514	AGCAGCAUUGUACAGGGCUAUC	53	23	5763.42	132.986	13571.1	192.584	experimental
1636	xbz_5186	AGGAAGGCAGCAGGCGC	53	24	16964.4	193.823	4024.7	63.9167	experimental
1637	he_50188	UAGCUUGUCAGAUUAAUGUUGAUA	53	25	182.528	13.7986	31.0278	1.74259	experimental
1638	he_27706	GGGGGUAUAGCUCAGGUGGUAGAGCAUUUG	53	26	12881.9	298.208	1960.12	109.08	experimental
1639	he_47509	UCUCUAUUUGAACCAGAUAGGACUUUUG	53	27	191.389	13.8036	31.7685	4.35913	experimental
1640	he_15724	GGCUCGUUGGUCUAGGGGUAUGAUCCU	53	28	40395.8	445.601	18260.7	302.134	experimental
1641	he_5221	CUGGCUUUUUACCGGAAAGCCCC	53	29	227.778	8.2839	39.0463	3.14861	experimental
1642	he_25668	CACUGAAAAUGUUUAGACGGGCU	53	30	31254	580.86	5610.55	154.72	experimental
1643	Ctr03-2P		53	31	274.954	17.6033	167.194	21.904	control	control_spike-calibration	LC Internal Use
1644	Ctr03-2M05		54	1	255.222	15.329	34.3611	4.93785	control	control_spike-calibration	LC Internal Use
1645	xbz_5371	UGGGUCUUUGCGGGCGAGAUGA	54	2	517.519	36.8063	156.5	20.9528	experimental
1646	xbz_29478	CAGCAGCAAUUCAUGUUUUGA	54	3	262.843	13.3796	45.1852	5.8997	experimental
1647	xbz_7657	UUCUCUGGCGCAAUGGAUAGC	54	4	269.574	15.6374	34.2963	1.81509	experimental
1648	he_48741	AGUUGGUUACAGCUUGGUGU	54	5	244.157	12.9493	33.4444	2.21859	experimental
1649	he_27831	AGCUGUGAUGCCCACCUGUUUACCUGAGA	54	6	256.528	17.7029	36.7222	4.48222	experimental
1650	he_47514	ACCGGGAUGGCCGAGUGGUUAAGGCGUUGG	54	7	9275.56	253.434	858.278	44.2275	experimental
1651	he_16347	AAAUAUGAUGAGUGUACAAAAUCUUGAUU	54	8	242.824	18.1421	98.4907	22.5718	experimental
1652	he_11662	UUCAGGUCCCUGUUGGGCUCCA	54	9	233.5	12.6192	34.3056	3.91608	experimental
1653	he_25728	ACUCUUUUAGUAUAAAUAGUACCGUU	54	10	1741.48	131.946	81.7963	11.6545	experimental
1654	Ctr03-2M05		54	11	225.704	10.2622	36.8889	3.81422	control	control_spike-calibration	LC Internal Use
1655	xbz_5371	UGGGUCUUUGCGGGCGAGAUGA	54	12	441.648	41.0034	166.694	21.318	experimental
1656	xbz_29478	CAGCAGCAAUUCAUGUUUUGA	54	13	213.222	11.9448	45.1667	6.10883	experimental
1657	xbz_7657	UUCUCUGGCGCAAUGGAUAGC	54	14	214.935	25.1174	33.3796	2.49754	experimental
1658	he_48741	AGUUGGUUACAGCUUGGUGU	54	15	208.167	11.9301	31.4537	4.00323	experimental
1659	he_27831	AGCUGUGAUGCCCACCUGUUUACCUGAGA	54	16	233.731	12.453	41.75	3.55235	experimental
1660	he_47514	ACCGGGAUGGCCGAGUGGUUAAGGCGUUGG	54	17	8210.93	162.311	830.917	47.8772	experimental
1661	he_16347	AAAUAUGAUGAGUGUACAAAAUCUUGAUU	54	18	204.694	10.5648	102.38	8.33158	experimental
1662	he_11662	UUCAGGUCCCUGUUGGGCUCCA	54	19	196.324	10.5554	35.3426	4.20983	experimental
1663	he_25728	ACUCUUUUAGUAUAAAUAGUACCGUU	54	20	1603.73	73.4603	81.4074	12.4293	experimental
1664	Ctr03-2M05		54	21	179.63	9.06528	33.6852	2.11646	control	control_spike-calibration	LC Internal Use
1665	xbz_5371	UGGGUCUUUGCGGGCGAGAUGA	54	22	402.694	32.0255	154.824	18.9164	experimental
1666	xbz_29478	CAGCAGCAAUUCAUGUUUUGA	54	23	207.306	14.7841	48.7222	4.92909	experimental
1667	xbz_7657	UUCUCUGGCGCAAUGGAUAGC	54	24	203.722	17.4799	36.9537	4.46457	experimental
1668	he_48741	AGUUGGUUACAGCUUGGUGU	54	25	185.407	8.24852	31.7407	2.4509	experimental
1669	he_27831	AGCUGUGAUGCCCACCUGUUUACCUGAGA	54	26	209.083	14.5423	34.1389	3.70516	experimental
1670	he_47514	ACCGGGAUGGCCGAGUGGUUAAGGCGUUGG	54	27	8040.11	183.582	772.787	46.8126	experimental
1671	he_16347	AAAUAUGAUGAGUGUACAAAAUCUUGAUU	54	28	203.306	17.2299	79.6389	10.9352	experimental
1672	he_11662	UUCAGGUCCCUGUUGGGCUCCA	54	29	202.102	18.6878	34.1204	4.03656	experimental
1673	he_25728	ACUCUUUUAGUAUAAAUAGUACCGUU	54	30	1980.32	149.92	87.5833	11.2217	experimental
1674	Ctr03-2M05		54	31	217.796	14.7197	33.287	5.13564	control	control_spike-calibration	LC Internal Use
1675	Ctr03-2M10		55	1	235.694	15.4445	30.4074	2.80532	control	control_spike-calibration	LC Internal Use
1676	xbz_4627	UUUGUUGCCAUUGCAGGAU	55	2	250.037	18.2782	32.2315	3.63937	experimental
1677	xbz_20113	CAGCAGCACACUGUGGUUUGU	55	3	279.306	11.7055	76.8704	11.3344	experimental
1678	xbz_630	UCUUCUCUGUUUUGGCCAUGU	55	4	243.593	10.4013	33.2315	4.04786	experimental
1679	he_36383	UAACAGUCUACAGCCAUGGUCGC	55	5	1014.16	67.6939	407.083	39.0363	experimental
1680	he_28329	CUCUGUGGCGCAAUGGACGAGCGCGCUG	55	6	396.546	33.5666	68.8519	8.5771	experimental
1681	he_47519	GGCCCCAUGGUGUAAUGGUCAGCACUCUG	55	7	5945.99	186.282	1460.53	85.848	experimental
1682	he_16349	GCAAAUGAUGAUAAACUGGAUCUGACU	55	8	292.324	24.7775	1855.83	105.455	experimental
1683	he_17291	GUUUCCCAGCCAACGCACCA	55	9	7811.79	206.314	892.481	72.0666	experimental
1684	he_25733	UGGUAUAUAGUUUAAACAAAACGAAUG	55	10	1626.04	120.172	51.037	3.89086	experimental
1685	Ctr03-2M10		55	11	226.111	15.6452	34.9074	3.50043	control	control_spike-calibration	LC Internal Use
1686	xbz_4627	UUUGUUGCCAUUGCAGGAU	55	12	222.019	27.4778	33.3611	3.38346	experimental
1687	xbz_20113	CAGCAGCACACUGUGGUUUGU	55	13	226.435	21.5052	77.1574	12.7647	experimental
1688	xbz_630	UCUUCUCUGUUUUGGCCAUGU	55	14	201.519	11.3784	30.1111	4.62487	experimental
1689	he_36383	UAACAGUCUACAGCCAUGGUCGC	55	15	767	61.2409	389.435	44.5378	experimental
1690	he_28329	CUCUGUGGCGCAAUGGACGAGCGCGCUG	55	16	365.657	36.2806	87.4074	6.74923	experimental
1691	he_47519	GGCCCCAUGGUGUAAUGGUCAGCACUCUG	55	17	5144.22	81.6956	1609.5	70.3942	experimental
1692	he_16349	GCAAAUGAUGAUAAACUGGAUCUGACU	55	18	252.741	17.4036	1752.27	105.74	experimental
1693	he_17291	GUUUCCCAGCCAACGCACCA	55	19	6738.14	174.236	802.519	55.5206	experimental
1694	he_25733	UGGUAUAUAGUUUAAACAAAACGAAUG	55	20	1420.99	76.1075	50.2037	9.17306	experimental
1695	Ctr03-2M10		55	21	181.454	10.3765	31.6019	3.24092	control	control_spike-calibration	LC Internal Use
1696	xbz_4627	UUUGUUGCCAUUGCAGGAU	55	22	187.046	16.3509	31.5833	3.08789	experimental
1697	xbz_20113	CAGCAGCACACUGUGGUUUGU	55	23	210.972	17.3972	73.2037	5.38908	experimental
1698	xbz_630	UCUUCUCUGUUUUGGCCAUGU	55	24	191.204	10.4513	32.8333	2.72579	experimental
1699	he_36383	UAACAGUCUACAGCCAUGGUCGC	55	25	761.935	48.7943	347.519	26.3508	experimental
1700	he_28329	CUCUGUGGCGCAAUGGACGAGCGCGCUG	55	26	330.519	28.4922	69.0463	10.1617	experimental
1701	he_47519	GGCCCCAUGGUGUAAUGGUCAGCACUCUG	55	27	5194.24	128.997	1472.01	88.1289	experimental
1702	he_16349	GCAAAUGAUGAUAAACUGGAUCUGACU	55	28	260.037	20.9105	1680.27	75.6851	experimental
1703	he_17291	GUUUCCCAGCCAACGCACCA	55	29	7275.17	189.153	943.389	55.1538	experimental
1704	he_25733	UGGUAUAUAGUUUAAACAAAACGAAUG	55	30	1776.19	157.707	62.3981	12.5318	experimental
1705	Ctr03-2M10		55	31	207.176	10.1869	29.6852	2.40579	control	control_spike-calibration	LC Internal Use
1706	Ctr04-2P		56	1	260.352	20.1528	39.0926	5.57286	control	control_spike-calibration	LC Internal Use
1707	xbz_5349	AGCUCGGUCUGAGGCCCCUCAGU	56	2	998.954	103.741	670.667	54.3056	experimental
1708	xbz_21465	UUGCAGCUGCCUGGGAGUGACU	56	3	404.222	38.6364	148.694	16.4496	experimental
1709	xbz_13754	UGAGGUAGUAGAUUGUAUAGUUG	56	4	15146.7	257.663	14187.9	405.088	experimental
1710	he_49811	UUUGGCACUAGCACAUUUUUGCU	56	5	342.722	24.4077	505.611	52.8133	experimental
1711	he_28378	GCGUUGGUGGUAUAGUGGUGAGCAUAGUUG	56	6	29337	580.144	4000.99	109.924	experimental
1712	he_47535	GGCUCUGUGGCUUAGUUGGCUAAAGCGCCU	56	7	271.667	18.913	38.3426	5.348	experimental
1713	he_16687	AAAUUUUUAAGGUGGUAGUAUAAAUGG	56	8	235.028	12.7832	30.6019	2.79833	experimental
1714	he_5403	AGUUGGUUAGAGCGUGGUGCUG	56	9	294.37	28.853	43.3981	4.56508	experimental
1715	xbz_14049	AUGUUUAGACGGGCUCAC	56	10	38509.9	396.852	9118.81	141.333	experimental
1716	Ctr04-2P		56	11	218.185	16.4761	41.6852	6.03672	control	control_spike-calibration	LC Internal Use
1717	xbz_5349	AGCUCGGUCUGAGGCCCCUCAGU	56	12	857.222	79.0963	649.463	41.1595	experimental
1718	xbz_21465	UUGCAGCUGCCUGGGAGUGACU	56	13	333.38	22.3463	131.685	10.7882	experimental
1719	xbz_13754	UGAGGUAGUAGAUUGUAUAGUUG	56	14	12436.7	265.824	13075.1	357.607	experimental
1720	he_49811	UUUGGCACUAGCACAUUUUUGCU	56	15	268.926	26.0706	523.074	47.6725	experimental
1721	he_28378	GCGUUGGUGGUAUAGUGGUGAGCAUAGUUG	56	16	24684.4	371.528	4261.17	88.0894	experimental
1722	he_47535	GGCUCUGUGGCUUAGUUGGCUAAAGCGCCU	56	17	248.565	16.8624	45.9167	4.7873	experimental
1723	he_16687	AAAUUUUUAAGGUGGUAGUAUAAAUGG	56	18	196.12	9.35361	34.463	3.28811	experimental
1724	he_5403	AGUUGGUUAGAGCGUGGUGCUG	56	19	249.852	13.6572	37.1944	3.30239	experimental
1725	xbz_14049	AUGUUUAGACGGGCUCAC	56	20	32462.9	270.705	8682.22	201.071	experimental
1726	Ctr04-2P		56	21	196.352	13.3005	40.5278	5.23371	control	control_spike-calibration	LC Internal Use
1727	xbz_5349	AGCUCGGUCUGAGGCCCCUCAGU	56	22	793.296	57.3608	699.176	61.3558	experimental
1728	xbz_21465	UUGCAGCUGCCUGGGAGUGACU	56	23	311.481	16.5763	115.583	13.5902	experimental
1729	xbz_13754	UGAGGUAGUAGAUUGUAUAGUUG	56	24	12146.7	307.508	12266.9	213.608	experimental
1730	he_49811	UUUGGCACUAGCACAUUUUUGCU	56	25	283.222	17.5149	486.065	45.3102	experimental
1731	he_28378	GCGUUGGUGGUAUAGUGGUGAGCAUAGUUG	56	26	24391.2	280.569	3842.72	112.228	experimental
1732	he_47535	GGCUCUGUGGCUUAGUUGGCUAAAGCGCCU	56	27	226.944	17.322	34.8981	6.31855	experimental
1733	he_16687	AAAUUUUUAAGGUGGUAGUAUAAAUGG	56	28	193.509	16.0493	29.7963	2.71293	experimental
1734	he_5403	AGUUGGUUAGAGCGUGGUGCUG	56	29	245.324	13.8529	38.463	3.43001	experimental
1735	xbz_14049	AUGUUUAGACGGGCUCAC	56	30	35471	400.884	9280.53	151.307	experimental
1736	Ctr04-2P		56	31	260.241	88.8314	43.1111	22.7811	control	control_spike-calibration	LC Internal Use
1737	Ctr04-2M05		57	1	235.954	12.485	31.2315	2.35061	control	control_spike-calibration	LC Internal Use
1738	xbz_8656	AAGGUAGGGGAAUUUGU	57	2	252.222	14.5122	31.4444	3.06726	experimental
1739	xbz_20066	AAGCUGCCAGUUGAAGAACUGU	57	3	2266.36	124.558	10081.7	215.848	experimental
1740	xbz_2530	AGGCAGUGUAGUUAGCUGAUUGC	57	4	259.287	9.63837	63.25	6.52404	experimental
1741	he_48830	UCCCUGUCCUCCAGGAGCUCACGU	57	5	336.88	18.9212	255.963	17.6899	experimental
1742	he_28451	ACCCUGUGGUCUAGUGGUUAGGAGUUGG	57	6	20385.4	357.44	615.324	45.9554	experimental
1743	he_47544	GGGGGUGUAGCUCAGUGGUAGAGCGU	57	7	17271.3	226.159	2141.01	96.5566	experimental
1744	he_16726	GGGGGUAUAGCUCAGUGGUUGAGCAUUUG	57	8	11916.8	390.043	1827.19	85.7806	experimental
1745	he_10636	UCAACAAAAUCACUGAUGCUGGAG	57	9	522.722	22.6228	270.324	34.229	experimental
1746	xbz_14076	GUUAAGAUGGCAGAGCCCGGU	57	10	28305.3	284.45	5125.94	160.343	experimental
1747	Ctr04-2M05		57	11	215.889	6.47545	34.1574	2.81572	control	control_spike-calibration	LC Internal Use
1748	xbz_8656	AAGGUAGGGGAAUUUGU	57	12	213.5	17.6543	33.0926	3.64688	experimental
1749	xbz_20066	AAGCUGCCAGUUGAAGAACUGU	57	13	1792.55	95.2604	8689.98	182.512	experimental
1750	xbz_2530	AGGCAGUGUAGUUAGCUGAUUGC	57	14	211.056	19.088	57.7315	9.75648	experimental
1751	he_48830	UCCCUGUCCUCCAGGAGCUCACGU	57	15	248.491	19.1094	248.787	35.77	experimental
1752	he_28451	ACCCUGUGGUCUAGUGGUUAGGAGUUGG	57	16	17338.6	214.241	745.074	28.7635	experimental
1753	he_47544	GGGGGUGUAGCUCAGUGGUAGAGCGU	57	17	15238.5	296.438	2201.63	126.806	experimental
1754	he_16726	GGGGGUAUAGCUCAGUGGUUGAGCAUUUG	57	18	10746.1	355.329	1749.62	64.5568	experimental
1755	he_10636	UCAACAAAAUCACUGAUGCUGGAG	57	19	423.241	34.3348	237.241	26.9679	experimental
1756	xbz_14076	GUUAAGAUGGCAGAGCCCGGU	57	20	24101.5	386.295	4895.54	119.334	experimental
1757	Ctr04-2M05		57	21	184.861	9.59503	30.713	2.38395	control	control_spike-calibration	LC Internal Use
1758	xbz_8656	AAGGUAGGGGAAUUUGU	57	22	180.88	8.82723	32.3241	3.11412	experimental
1759	xbz_20066	AAGCUGCCAGUUGAAGAACUGU	57	23	1696.57	86.9448	8564.56	139.607	experimental
1760	xbz_2530	AGGCAGUGUAGUUAGCUGAUUGC	57	24	223.981	22.0996	60.4259	5.97222	experimental
1761	he_48830	UCCCUGUCCUCCAGGAGCUCACGU	57	25	252.204	18.538	237.454	28.2288	experimental
1762	he_28451	ACCCUGUGGUCUAGUGGUUAGGAGUUGG	57	26	16771.5	384.439	647.889	59.2519	experimental
1763	he_47544	GGGGGUGUAGCUCAGUGGUAGAGCGU	57	27	14879.5	340.167	2006.31	111.703	experimental
1764	he_16726	GGGGGUAUAGCUCAGUGGUUGAGCAUUUG	57	28	10752.3	199.828	1630.31	79.2792	experimental
1765	he_10636	UCAACAAAAUCACUGAUGCUGGAG	57	29	461.565	29.5361	239.907	31.0807	experimental
1766	xbz_14076	GUUAAGAUGGCAGAGCCCGGU	57	30	26162.4	199.479	5364.87	172.141	experimental
1767	Ctr04-2M05		57	31	203.213	12.369	32.2407	2.93821	control	control_spike-calibration	LC Internal Use
1768	Ctr04-2M10		58	1	245.463	13.7375	34.5833	2.92308	control	control_spike-calibration	LC Internal Use
1769	xbz_4929	AGAUGUCCGGGACUGCACGCGCG	58	2	4738.96	222.076	522.611	38.0179	experimental
1770	xbz_29280	CUUAUCAGAUUGUAUUGUAAU	58	3	248.769	15.1698	32.5556	2.21859	experimental
1771	xbz_14512	AAUGGCGCCACUAGGGUUGU	58	4	378	23.3246	172.667	16.7377	experimental
1772	he_38408	AGGGCUUAGCUGCUUGUGAGCA	58	5	726.565	53.6206	62.3889	7.54529	experimental
1773	he_28474	AUACAUGAUGAUCUCAAUCCAACUUG	58	6	1211.88	97.4078	22499.6	449.916	experimental
1774	he_47546	GGGGGUGUAGCUCAGUGGUAGAGCACAUG	58	7	15383	370.799	1669.22	85.3526	experimental
1775	he_17407	CACCAUGAUGGAACUGAGGAUCUGAGGAA	58	8	285.278	16.6205	516.222	26.7681	experimental
1776	he_23832	AAGCAAAUUAUAGAGAUGAUAA	58	9	244.75	14.609	33.8796	2.30691	experimental
1777	xbz_14129	GAGAAAGCUCACAAGAACUG	58	10	33112.6	339.448	12138	243.646	experimental
1778	Ctr04-2M10		58	11	220.759	9.98211	35.3611	2.86278	control	control_spike-calibration	LC Internal Use
1779	xbz_4929	AGAUGUCCGGGACUGCACGCGCG	58	12	4013.71	104.554	532	27.2139	experimental
1780	xbz_29280	CUUAUCAGAUUGUAUUGUAAU	58	13	198.074	13.8407	29.9815	2.57225	experimental
1781	xbz_14512	AAUGGCGCCACUAGGGUUGU	58	14	317.259	23.7425	140.741	14.4742	experimental
1782	he_38408	AGGGCUUAGCUGCUUGUGAGCA	58	15	573.315	57.9756	65.0556	9.43233	experimental
1783	he_28474	AUACAUGAUGAUCUCAAUCCAACUUG	58	16	1046.05	55.4559	24378	281.724	experimental
1784	he_47546	GGGGGUGUAGCUCAGUGGUAGAGCACAUG	58	17	13630.7	282.268	1746.52	76.6498	experimental
1785	he_17407	CACCAUGAUGGAACUGAGGAUCUGAGGAA	58	18	247.148	20.3602	483.583	34.2364	experimental
1786	he_23832	AAGCAAAUUAUAGAGAUGAUAA	58	19	186.074	7.7685	31.25	2.93584	experimental
1787	xbz_14129	GAGAAAGCUCACAAGAACUG	58	20	28352	220.084	11796.5	227.316	experimental
1788	Ctr04-2M10		58	21	179.194	12.0043	32.4907	2.66334	control	control_spike-calibration	LC Internal Use
1789	xbz_4929	AGAUGUCCGGGACUGCACGCGCG	58	22	3755.83	118.904	529.898	47.1506	experimental
1790	xbz_29280	CUUAUCAGAUUGUAUUGUAAU	58	23	198.296	11.4339	33.2037	3.26625	experimental
1791	xbz_14512	AAUGGCGCCACUAGGGUUGU	58	24	291.028	20.4635	150.148	18.1225	experimental
1792	he_38408	AGGGCUUAGCUGCUUGUGAGCA	58	25	571.731	35.8719	66.6111	12.1369	experimental
1793	he_28474	AUACAUGAUGAUCUCAAUCCAACUUG	58	26	1031.04	72.946	22373.6	229.046	experimental
1794	he_47546	GGGGGUGUAGCUCAGUGGUAGAGCACAUG	58	27	13409.9	190.208	1583.04	75.9953	experimental
1795	he_17407	CACCAUGAUGGAACUGAGGAUCUGAGGAA	58	28	232.407	19.8273	449.935	42.0361	experimental
1796	he_23832	AAGCAAAUUAUAGAGAUGAUAA	58	29	180.315	10.486	31.4074	2.88417	experimental
1797	xbz_14129	GAGAAAGCUCACAAGAACUG	58	30	31033.2	301.012	12436.2	142.806	experimental
1798	Ctr04-2M10		58	31	219.222	13.4917	33.8241	3.34001	control	control_spike-calibration	LC Internal Use
1799	Ctr05-2P		59	1	286.204	15.594	99.8148	11.69	control	control_spike-calibration	LC Internal Use
1800	xbz_8613	AGCUGGUGUUGUGAAUCAGGCCGU	59	2	262.12	13.1957	40.0463	4.22362	experimental
1801	xbz_20067	AGUUCUUCAGUGGCAAGCUUUA	59	3	557.528	56.0853	392.028	28.389	experimental
1802	xbz_12703	UCAAGAGCAAUAACGAAAAAUG	59	4	286.491	21.854	39.6481	4.79742	experimental
1803	he_48076	UGUAAACAUCCUCGACUGGAAGCU	59	5	3679	85.8705	8012.75	176.763	experimental
1804	he_28476	UACAAUGAUGAUAACAUAGUUCAGCAGA	59	6	526.787	35.4696	6326.47	110.707	experimental
1805	he_47550	GGGGGUAUAGCUCAGUGGUAGAGCGCGUG	59	7	14469.1	347.58	2066.04	77.8273	experimental
1806	he_17423	AUAAAUGAUGAUCAGCAGAAUCUGAGU	59	8	253.083	24.3057	33.8148	4.26274	experimental
1807	he_22897	UUAGAUGACAUAAGCUCAGAA	59	9	242.194	13.6836	34.3426	2.35678	experimental
1808	xbz_14130	ACAGCUAUCCAUUGGUCUU	59	10	7933.01	183.314	1173.88	51.0299	experimental
1809	Ctr05-2P		59	11	261.519	13.9247	91.0833	13.7346	control	control_spike-calibration	LC Internal Use
1810	xbz_8613	AGCUGGUGUUGUGAAUCAGGCCGU	59	12	210.843	10.232	39.9907	4.16594	experimental
1811	xbz_20067	AGUUCUUCAGUGGCAAGCUUUA	59	13	429.046	38.6795	310.787	22.8903	experimental
1812	xbz_12703	UCAAGAGCAAUAACGAAAAAUG	59	14	221.963	15.9039	38.0093	3.88021	experimental
1813	he_48076	UGUAAACAUCCUCGACUGGAAGCU	59	15	3040.1	110.237	8105.79	207.538	experimental
1814	he_28476	UACAAUGAUGAUAACAUAGUUCAGCAGA	59	16	458.731	26.6905	6963.94	143.746	experimental
1815	he_47550	GGGGGUAUAGCUCAGUGGUAGAGCGCGUG	59	17	12742	213.711	2190.52	60.1926	experimental
1816	he_17423	AUAAAUGAUGAUCAGCAGAAUCUGAGU	59	18	203.222	9.0185	37.1019	3.70889	experimental
1817	he_22897	UUAGAUGACAUAAGCUCAGAA	59	19	207.944	20.5207	35.287	3.37404	experimental
1818	xbz_14130	ACAGCUAUCCAUUGGUCUU	59	20	6488.47	238.185	1048.84	59.79	experimental
1819	Ctr05-2P		59	21	205.861	17.7303	98.5556	17.7445	control	control_spike-calibration	LC Internal Use
1820	xbz_8613	AGCUGGUGUUGUGAAUCAGGCCGU	59	22	199.546	9.89514	40.9259	4.28582	experimental
1821	xbz_20067	AGUUCUUCAGUGGCAAGCUUUA	59	23	438.222	29.7118	352.074	21.6901	experimental
1822	xbz_12703	UCAAGAGCAAUAACGAAAAAUG	59	24	211.306	12.2394	40.3056	5.1636	experimental
1823	he_48076	UGUAAACAUCCUCGACUGGAAGCU	59	25	2991.44	90.4355	7334.91	155.058	experimental
1824	he_28476	UACAAUGAUGAUAACAUAGUUCAGCAGA	59	26	408.954	34.8485	6396.12	162.664	experimental
1825	he_47550	GGGGGUAUAGCUCAGUGGUAGAGCGCGUG	59	27	12468.8	288.656	2023.61	56.3304	experimental
1826	he_17423	AUAAAUGAUGAUCAGCAGAAUCUGAGU	59	28	202.63	13.076	30.5463	3.09774	experimental
1827	he_22897	UUAGAUGACAUAAGCUCAGAA	59	29	189.287	10.5989	30.9815	2.31202	experimental
1828	xbz_14130	ACAGCUAUCCAUUGGUCUU	59	30	7260.65	176.681	1168.94	62.7277	experimental
1829	Ctr05-2P		59	31	233.046	18.1892	97.0463	12.6745	control	control_spike-calibration	LC Internal Use
1830	Ctr05-2M05		60	1	251.769	13.5547	34.4444	2.72864	control	control_spike-calibration	LC Internal Use
1831	xbz_11341	AUAGGUAUUAAGGUUUU	60	2	249.056	12.8695	33.8704	2.85504	experimental
1832	xbz_28567	UAGUUAUCAGACUGAUGUUUAA	60	3	279.472	15.4433	42.2963	4.55754	experimental
1833	xbz_8337	GUGAGGUAGUAGGUUGUAUAGU	60	4	21367.6	341.188	22956.4	806.894	experimental
1834	he_33594	UAGCAGCACAUAAUGGUUUGU	60	5	2032.19	110.442	5108.31	162.395	experimental
1835	he_28479	UGUUAGUGAUGAUUUUAAAAUUAAAG	60	6	235.009	14.0902	48.5463	5.85077	experimental
1836	he_47551	GCCGAGAUAGCUCAGUUGGGAGAGCGUUAG	60	7	1733.35	91.0724	202.241	35.4131	experimental
1837	he_17441	CUGAAAUGAAGAGAAUACUCAUUGCUGAUC	60	8	419.778	36.308	6672.14	249.62	experimental
1838	he_24741	AAAGGAAUUUUGAAGAGAGAGUU	60	9	243.509	16.1803	35.1389	3.15179	experimental
1839	xbz_14109	ACAACAUUCAAAAAAGAGUAAUA	60	10	233.37	9.57664	37.0741	3.39242	experimental
1840	Ctr05-2M05		60	11	218.315	15.053	35.3519	4.9053	control	control_spike-calibration	LC Internal Use
1841	xbz_11341	AUAGGUAUUAAGGUUUU	60	12	202.037	10.5183	30.25	1.63561	experimental
1842	xbz_28567	UAGUUAUCAGACUGAUGUUUAA	60	13	206	14.2619	40.4074	3.78397	experimental
1843	xbz_8337	GUGAGGUAGUAGGUUGUAUAGU	60	14	17598.3	200.036	19827.5	466.967	experimental
1844	he_33594	UAGCAGCACAUAAUGGUUUGU	60	15	1625.96	88.8737	5068.17	65.8035	experimental
1845	he_28479	UGUUAGUGAUGAUUUUAAAAUUAAAG	60	16	203.565	9.2335	53.1296	6.62915	experimental
1846	he_47551	GCCGAGAUAGCUCAGUUGGGAGAGCGUUAG	60	17	1552.79	99.0631	210.074	22.1725	experimental
1847	he_17441	CUGAAAUGAAGAGAAUACUCAUUGCUGAUC	60	18	364.093	26.252	6229.95	118.386	experimental
1848	he_24741	AAAGGAAUUUUGAAGAGAGAGUU	60	19	190.639	16.1404	34.5926	3.91269	experimental
1849	xbz_14109	ACAACAUUCAAAAAAGAGUAAUA	60	20	190.306	14.2943	34.2685	3.42778	experimental
1850	Ctr05-2M05		60	21	195.167	13.2837	34.4259	3.64603	control	control_spike-calibration	LC Internal Use
1851	xbz_11341	AUAGGUAUUAAGGUUUU	60	22	183.481	8.48801	33.8981	3.31505	experimental
1852	xbz_28567	UAGUUAUCAGACUGAUGUUUAA	60	23	210.426	15.1455	44.2685	8.54412	experimental
1853	xbz_8337	GUGAGGUAGUAGGUUGUAUAGU	60	24	16691.2	289.576	19479.6	334.867	experimental
1854	he_33594	UAGCAGCACAUAAUGGUUUGU	60	25	1596.26	83.2807	4845.45	104.22	experimental
1855	he_28479	UGUUAGUGAUGAUUUUAAAAUUAAAG	60	26	180.769	10.2771	40	5.50106	experimental
1856	he_47551	GCCGAGAUAGCUCAGUUGGGAGAGCGUUAG	60	27	1491.45	50.6792	177.917	23.3367	experimental
1857	he_17441	CUGAAAUGAAGAGAAUACUCAUUGCUGAUC	60	28	330.454	25.7912	5969.42	127.461	experimental
1858	he_24741	AAAGGAAUUUUGAAGAGAGAGUU	60	29	187.454	9.20319	30.9352	1.69812	experimental
1859	xbz_14109	ACAACAUUCAAAAAAGAGUAAUA	60	30	198.5	11.3734	30.9352	3.08833	experimental
1860	Ctr05-2M05		60	31	207.009	9.53645	34.0833	4.41562	control	control_spike-calibration	LC Internal Use
1861	Ctr05-2M10		61	1	452.565	38.3343	39.037	4.15568	control	control_spike-calibration	LC Internal Use
1862	xbz_5348	UGAGGGGCAGAGAGCGAGACUUU	61	2	2444.94	124.117	759.639	57.2312	experimental
1863	xbz_19721	AACCAGGCGGAAACACCAAA	61	3	2258.6	131.715	613.361	53.9644	experimental
1864	xbz_7517	UUCAAGUAAUUCAGGAUAGGUU	61	4	6270.49	253.512	4997.87	275.345	experimental
1865	he_53033	ACCUGGCAUACAAUGUAGAUUUCU	61	5	647.407	25.3458	284.759	27.0796	experimental
1866	he_28480	UGAGCAUGUAGACAAAGGUAACACUGAAG	61	6	1084.24	84.2741	9722.06	272.29	experimental
1867	he_47552	GGGGGUAUAGCUCAGCGGUAGAGCGCG	61	7	15312.4	271.155	2245.36	98.9	experimental
1868	he_18129	UUAGUUUUACCCUACUGAUGAUCUGUUG	61	8	1050.96	46.2154	89.4907	14.184	experimental
1869	he_23198	UAGCACAUGAAAUCAGUUAA	61	9	242.935	12.4257	34.4167	4.21418	experimental
1870	xbz_14070	CAGAACCCAACCUCCGAGCAGUA	61	10	1744.26	98.4464	113.065	14.8414	experimental
1871	Ctr05-2M10		61	11	375.176	34.2729	40.8981	3.70889	control	control_spike-calibration	LC Internal Use
1872	xbz_5348	UGAGGGGCAGAGAGCGAGACUUU	61	12	2059.87	93.7878	685.074	72.359	experimental
1873	xbz_19721	AACCAGGCGGAAACACCAAA	61	13	1715.66	85.1902	529.472	42.9016	experimental
1874	xbz_7517	UUCAAGUAAUUCAGGAUAGGUU	61	14	5225.61	218.465	4487.54	196.994	experimental
1875	he_53033	ACCUGGCAUACAAUGUAGAUUUCU	61	15	550.148	48.5093	289.787	16.1789	experimental
1876	he_28480	UGAGCAUGUAGACAAAGGUAACACUGAAG	61	16	907.241	55.743	10417.1	153.207	experimental
1877	he_47552	GGGGGUAUAGCUCAGCGGUAGAGCGCG	61	17	13519.2	224.4	2331.69	63.399	experimental
1878	he_18129	UUAGUUUUACCCUACUGAUGAUCUGUUG	61	18	932.046	41.9801	91.1852	10.2457	experimental
1879	he_23198	UAGCACAUGAAAUCAGUUAA	61	19	179.713	11.149	32.6111	2.77786	experimental
1880	xbz_14070	CAGAACCCAACCUCCGAGCAGUA	61	20	1492.76	89.9396	111.306	13.7999	experimental
1881	Ctr05-2M10		61	21	316.074	24.689	39.3519	4.10679	control	control_spike-calibration	LC Internal Use
1882	xbz_5348	UGAGGGGCAGAGAGCGAGACUUU	61	22	1970.69	108.807	730.704	81.2691	experimental
1883	xbz_19721	AACCAGGCGGAAACACCAAA	61	23	1663.97	105.467	579.019	37.1418	experimental
1884	xbz_7517	UUCAAGUAAUUCAGGAUAGGUU	61	24	5115.69	175.075	4417.19	170.708	experimental
1885	he_53033	ACCUGGCAUACAAUGUAGAUUUCU	61	25	537.028	40.2289	284.102	24.6011	experimental
1886	he_28480	UGAGCAUGUAGACAAAGGUAACACUGAAG	61	26	830.713	63.0421	9569.8	188.234	experimental
1887	he_47552	GGGGGUAUAGCUCAGCGGUAGAGCGCG	61	27	13313.6	207.293	2183.9	98.9855	experimental
1888	he_18129	UUAGUUUUACCCUACUGAUGAUCUGUUG	61	28	1069.66	101.16	85.3611	7.95602	experimental
1889	he_23198	UAGCACAUGAAAUCAGUUAA	61	29	191.722	8.0696	31.287	2.27564	experimental
1890	xbz_14070	CAGAACCCAACCUCCGAGCAGUA	61	30	1683.94	98.7784	119.157	10.1863	experimental
1891	Ctr05-2M10		61	31	365.741	22.8634	41.5741	5.39159	control	control_spike-calibration	LC Internal Use
1892	Ctr06-2P		62	1	1230.88	57.3731	3876.08	149.599	control	control_spike-calibration	LC Internal Use
1893	xbz_2650	GAGGGGGCGGGCUCCGGCG	62	2	30922	435.98	2922.39	92.9619	experimental
1894	xbz_22723	AGUUGGGAGAGCAUCG	62	3	261.074	16.6305	39.9907	2.83995	experimental
1895	xbz_6475	UGAGGUAGGAGGUUGUAUAGUU	62	4	10630.1	290.984	8212.88	377.095	experimental
1896	he_17478	CACUAGAUUGUGAGCUCCUGGA	62	5	501.139	31.4151	253.648	24.9393	experimental
1897	he_28482	CCUGGAUGAUGAUAAGCAAAUGCUGACU	62	6	1217.44	71.8587	17190.1	262.038	experimental
1898	he_47554	GGGGGUAUAGCUCAGUGGUAGAGAGUG	62	7	13384.7	272.737	1818.52	99.8879	experimental
1899	he_18225	UCCCUGGUGGUCUAGUGGUUAGGAUUCAGU	62	8	36789.3	460.339	6432.52	122.566	experimental
1900	he_5721	GUGAAUGAUGAGUAUUGACA	62	9	236.963	11.8825	35.6389	3.54532	experimental
1901	xbz_14050	CACCACGAUCAAAAGGGACA	62	10	1325.71	54.0941	122.102	10.9365	experimental
1902	Ctr06-2P		62	11	1059.2	60.2445	3076.53	78.2044	control	control_spike-calibration	LC Internal Use
1903	xbz_2650	GAGGGGGCGGGCUCCGGCG	62	12	25800.9	231.639	2709.47	73.7188	experimental
1904	xbz_22723	AGUUGGGAGAGCAUCG	62	13	201.667	12.546	35.2315	4.34409	experimental
1905	xbz_6475	UGAGGUAGGAGGUUGUAUAGUU	62	14	7482.73	279.448	5888.35	308.312	experimental
1906	he_17478	CACUAGAUUGUGAGCUCCUGGA	62	15	442.991	35.412	262.361	33.2918	experimental
1907	he_28482	CCUGGAUGAUGAUAAGCAAAUGCUGACU	62	16	1009.66	56.3184	18202.6	279.261	experimental
1908	he_47554	GGGGGUAUAGCUCAGUGGUAGAGAGUG	62	17	11860.8	175.424	1958.08	85.6761	experimental
1909	he_18225	UCCCUGGUGGUCUAGUGGUUAGGAUUCAGU	62	18	31267	412.274	6044.27	139.046	experimental
1910	he_5721	GUGAAUGAUGAGUAUUGACA	62	19	186.167	11.1628	34.037	2.76806	experimental
1911	xbz_14050	CACCACGAUCAAAAGGGACA	62	20	1030.31	84.4401	98.5	11.9801	experimental
1912	Ctr06-2P		62	21	912.537	32.8953	3179.72	72.591	control	control_spike-calibration	LC Internal Use
1913	xbz_2650	GAGGGGGCGGGCUCCGGCG	62	22	23427.6	252.332	2776.05	80.0869	experimental
1914	xbz_22723	AGUUGGGAGAGCAUCG	62	23	207.278	9.38166	39.6389	3.49488	experimental
1915	xbz_6475	UGAGGUAGGAGGUUGUAUAGUU	62	24	8591.31	303.797	7241.72	236.318	experimental
1916	he_17478	CACUAGAUUGUGAGCUCCUGGA	62	25	437.639	30.4479	250.593	26.4222	experimental
1917	he_28482	CCUGGAUGAUGAUAAGCAAAUGCUGACU	62	26	979.315	69.6927	17146.1	250.798	experimental
1918	he_47554	GGGGGUAUAGCUCAGUGGUAGAGAGUG	62	27	11708.5	196.382	1806.81	66.6283	experimental
1919	he_18225	UCCCUGGUGGUCUAGUGGUUAGGAUUCAGU	62	28	32160.1	441.984	5864.08	161.362	experimental
1920	he_5721	GUGAAUGAUGAGUAUUGACA	62	29	189.315	10.3596	33.0463	2.19338	experimental
1921	xbz_14050	CACCACGAUCAAAAGGGACA	62	30	1279.45	66.5986	125.38	13.3338	experimental
1922	Ctr06-2P		62	31	1089.59	49.2315	3365.44	96.2198	control	control_spike-calibration	LC Internal Use
1923	Ctr06-2M05		63	1	267.407	16.8218	42.8333	6.215	control	control_spike-calibration	LC Internal Use
1924	xbz_12	UAAUACUGCCUGGUAAUGAUGAC	63	2	13649.4	455.864	9273.56	254.553	experimental
1925	xbz_29277	CUUAGCAGGUUGUAUUAUCA	63	3	255.833	18.7639	37.3611	3.75527	experimental
1926	xbz_19	GAGGCUGAAGAGGACGC	63	4	3674.25	159.374	539.556	42.914	experimental
1927	he_22761	GAGCUUAUUCAUAAAAGUGCAG	63	5	252.176	11.8115	48	6.71725	experimental
1928	he_28483	AAUCAUGAAGAGAUGUACUAUCUGUCUGA	63	6	262.787	16.3347	1180.35	92.6777	experimental
1929	he_47558	GGGGGGUGUAGCUCAGUGGUAGAGCGCG	63	7	18346.5	299.589	2268.38	121.599	experimental
1930	he_18278	CCUUGGUGGUCUAGUGGUUAGGAUUCGG	63	8	43926.7	473.061	8285.91	175.666	experimental
1931	he_7061	UAAGAGGAUUAGAUACCCUGGU	63	9	255.417	12.7588	38.4907	5.01865	experimental
1932	xbz_14154	UCAUGGGGAAGCAGAUUUG	63	10	296.315	32.9658	40.5833	4.3688	experimental
1933	Ctr06-2M05		63	11	213.556	14.1225	40.537	4.39929	control	control_spike-calibration	LC Internal Use
1934	xbz_12	UAAUACUGCCUGGUAAUGAUGAC	63	12	11616.9	259.475	8621.46	196.481	experimental
1935	xbz_29277	CUUAGCAGGUUGUAUUAUCA	63	13	194.796	15.0132	29.3148	2.5783	experimental
1936	xbz_19	GAGGCUGAAGAGGACGC	63	14	2857.2	81.078	439.935	23.5774	experimental
1937	he_22761	GAGCUUAUUCAUAAAAGUGCAG	63	15	198.361	11.2967	50.3704	6.20912	experimental
1938	he_28483	AAUCAUGAAGAGAUGUACUAUCUGUCUGA	63	16	242.537	20.1473	1336.36	70.7315	experimental
1939	he_47558	GGGGGGUGUAGCUCAGUGGUAGAGCGCG	63	17	15742	227.502	2292.95	51.0555	experimental
1940	he_18278	CCUUGGUGGUCUAGUGGUUAGGAUUCGG	63	18	36939.5	331.847	7911.56	139.379	experimental
1941	he_7061	UAAGAGGAUUAGAUACCCUGGU	63	19	190.88	7.70328	32.4074	2.29195	experimental
1942	xbz_14154	UCAUGGGGAAGCAGAUUUG	63	20	246.954	27.1718	33.4537	4.06578	experimental
1943	Ctr06-2M05		63	21	189.037	13.9986	42.0093	6.78163	control	control_spike-calibration	LC Internal Use
1944	xbz_12	UAAUACUGCCUGGUAAUGAUGAC	63	22	10785.3	209.59	9150.69	264.505	experimental
1945	xbz_29277	CUUAGCAGGUUGUAUUAUCA	63	23	192.88	16.3551	34.6944	3.07069	experimental
1946	xbz_19	GAGGCUGAAGAGGACGC	63	24	2821.12	127.484	439.213	34.4319	experimental
1947	he_22761	GAGCUUAUUCAUAAAAGUGCAG	63	25	191.37	9.70749	51.2778	7.07877	experimental
1948	he_28483	AAUCAUGAAGAGAUGUACUAUCUGUCUGA	63	26	216.796	12.949	1209.41	40.0157	experimental
1949	he_47558	GGGGGGUGUAGCUCAGUGGUAGAGCGCG	63	27	15832.8	234.403	2213.49	65.1811	experimental
1950	he_18278	CCUUGGUGGUCUAGUGGUUAGGAUUCGG	63	28	38064.7	353.98	7556.14	184.741	experimental
1951	he_7061	UAAGAGGAUUAGAUACCCUGGU	63	29	214.963	10.3814	31.3796	2.12997	experimental
1952	xbz_14154	UCAUGGGGAAGCAGAUUUG	63	30	276.769	12.7877	38.75	6.35569	experimental
1953	Ctr06-2M05		63	31	208.37	13.1409	41.1481	5.48543	control	control_spike-calibration	LC Internal Use
1954	Ctr06-2M10		64	1	261.519	8.45823	50.6944	7.9089	control	control_spike-calibration	LC Internal Use
1955	xbz_14635	UCAGAGUUGACGAUC	64	2	254.019	12.8964	35.8889	4.5392	experimental
1956	xbz_27389	UGAAUUACCGAAGGGCCAU	64	3	370.528	26.4609	103.741	12.4483	experimental
1957	xbz_3732	ACUGCAGUGAAGGCACUUGUAG	64	4	260.111	9.68121	69.4352	12.0111	experimental
1958	he_6832	ACUGCAGUGAAGGCACUUGUAG	64	5	255.241	15.6789	68.0648	8.61022	experimental
1959	he_28713	AACAUUCAACGCUGUCGGUGAGUUUGGA	64	6	3462.77	130.387	5830.96	183.279	experimental
1960	he_47874	GUGCAGUGGUAUAGUGGUGAGCAUAGCU	64	7	24591.7	405.778	3041.36	167.603	experimental
1961	he_18955	GAAAAUGAUGAAUUCUGGGGCGCUGAUU	64	8	1192.31	78.0116	168.472	11.7055	experimental
1962	he_1916	UAGUACUGUGCAUAUCAUCUAU	64	9	242.241	10.3381	33.963	3.74647	experimental
1963	TU105	AAAUUGGCUGACUCUAACCAUUGUCAAGCUUA	64	10	228.435	12.8749	33.8056	2.04372	experimental
1964	Ctr06-2M10		64	11	228.481	14.6456	48.463	6.72619	control	control_spike-calibration	LC Internal Use
1965	xbz_14635	UCAGAGUUGACGAUC	64	12	200.204	12.8258	34.787	3.09371	experimental
1966	xbz_27389	UGAAUUACCGAAGGGCCAU	64	13	275.694	26.3845	81.5926	8.14247	experimental
1967	xbz_3732	ACUGCAGUGAAGGCACUUGUAG	64	14	199.898	11.2806	73.5185	7.3185	experimental
1968	he_6832	ACUGCAGUGAAGGCACUUGUAG	64	15	198.63	8.13851	67.7963	12.0263	experimental
1969	he_28713	AACAUUCAACGCUGUCGGUGAGUUUGGA	64	16	3000.91	148.59	6190.65	152.23	experimental
1970	he_47874	GUGCAGUGGUAUAGUGGUGAGCAUAGCU	64	17	21471.2	286.186	3185.93	62.0223	experimental
1971	he_18955	GAAAAUGAUGAAUUCUGGGGCGCUGAUU	64	18	1062.74	69.1657	183.815	25.9288	experimental
1972	he_1916	UAGUACUGUGCAUAUCAUCUAU	64	19	177.898	9.60134	31.6852	3.3114	experimental
1973	TU105	AAAUUGGCUGACUCUAACCAUUGUCAAGCUUA	64	20	175.787	9.91935	30.3333	4.18051	experimental
1974	Ctr06-2M10		64	21	194.148	13.0397	48.0278	6.43364	control	control_spike-calibration	LC Internal Use
1975	xbz_14635	UCAGAGUUGACGAUC	64	22	196.5	14.1286	35.1944	4.47936	experimental
1976	xbz_27389	UGAAUUACCGAAGGGCCAU	64	23	285.648	11.8624	97.6759	9.79207	experimental
1977	xbz_3732	ACUGCAGUGAAGGCACUUGUAG	64	24	191.574	13.3998	65.8611	6.93691	experimental
1978	he_6832	ACUGCAGUGAAGGCACUUGUAG	64	25	191.944	10.4755	66.0926	8.62678	experimental
1979	he_28713	AACAUUCAACGCUGUCGGUGAGUUUGGA	64	26	2846.97	119.176	6023.71	187.047	experimental
1980	he_47874	GUGCAGUGGUAUAGUGGUGAGCAUAGCU	64	27	21010.4	293.866	2953.55	98.6021	experimental
1981	he_18955	GAAAAUGAUGAAUUCUGGGGCGCUGAUU	64	28	1143.04	61.581	165.352	19.3788	experimental
1982	he_1916	UAGUACUGUGCAUAUCAUCUAU	64	29	207.361	17.8809	30.5	2.49673	experimental
1983	TU105	AAAUUGGCUGACUCUAACCAUUGUCAAGCUUA	64	30	204.88	10.0854	28	1.27521	experimental
1984	Ctr06-2M10		64	31	198.741	16.9355	45.5463	7.22584	control	control_spike-calibration	LC Internal Use
1985	Ctr07-2P		65	1	34193.4	410.432	48250.3	909.101	control	control_spike-calibration	LC Internal Use
1986	xbz_9862	UACUUGUUUUAGGAGUAUCUU	65	2	257.602	13.2693	34.3333	3.43974	experimental
1987	xbz_28720	CAAUUUAGUGUGUGUGAUAUU	65	3	263.065	12.7075	35.5463	2.91109	experimental
1988	xbz_251	CUUUCAGUCGGAUGUUUACAGC	65	4	464.694	26.6011	119.685	12.3354	experimental
1989	he_1493	UAUUGCACUCGUCCCGGCCUCC	65	5	4944.84	192.447	3785.28	224.205	experimental
1990	he_28866	GCGUUGGUGGUAUAGUGGUGAGGAUAGCU	65	6	28597.9	397.346	3060.34	122.684	experimental
1991	he_48827	UCCCUGUGAUGAAGUCACCCUGAGGGGC	65	7	264.463	17.7176	36.8981	4.13089	experimental
1992	he_19075	ACCCUGUAGUCUAGUGGUUAUGAUUUGG	65	8	236.509	11.8049	32.2407	2.29127	experimental
1993	he_3446	UGAGACACGUUGCGUAUUGA	65	9	237.065	13.5248	35.0093	4.00349	experimental
1994	TU107	AGAAGGUGCUUCUCCUAGGGCCCGAGUCUAGG	65	10	246.926	17.7678	35.5926	3.44255	experimental
1995	Ctr07-2P		65	11	27862.5	570.893	41651.4	522.471	control	control_spike-calibration	LC Internal Use
1996	xbz_9862	UACUUGUUUUAGGAGUAUCUU	65	12	199.019	10.3986	31.5463	2.68392	experimental
1997	xbz_28720	CAAUUUAGUGUGUGUGAUAUU	65	13	202.981	11.6282	31.2315	2.83043	experimental
1998	xbz_251	CUUUCAGUCGGAUGUUUACAGC	65	14	367.306	27.573	111.769	12.5948	experimental
[truncated: 1,971 more rows]

## Sheet: 处理后数据
		Sample A		Sample B					Diagnol Lines
索引	探针_ID	信号值	标准偏差	信号值	标准偏差	p值	log2 (SampeB / SampleA)	说明	P1	P2
1150	he_1011	837.663	49.5236	114.216	20.3447	0	-2.87461		1	1
1170	he_1011	696.782	50.4361	100.422	25.1346	0	-2.79463		100000	100000
1160	he_1011	744.279	58.324	102.531	21.26	0	-2.85978		1	1.5
3138	he_1012	981.871	64.9955	631.988	61.5804	0.00038953	-0.635635		100000	150000
3158	he_1012	912.232	76.9503	591.094	67.7252	0.00407448	-0.626012		1.5	1
940	he_10229	490.869	29.7856	230.939	24.8889	4.71708e-08	-1.08782		150000	100000
950	he_10229	421.412	28.0528	175.452	29.4276	6.5739e-07	-1.26416
960	he_10229	487.417	29.5273	241.398	29.7166	1.21827e-06	-1.01374
2939	he_10363	30957.4	252.515	68682	514.725	0	1.14965
2929	he_10363	32679.9	435.916	78993.6	979.125	0	1.27333
2919	he_10363	41318	771.197	71075.8	743.852	0	0.782589
667	he_10364	56.5015	11.0506	157.936	27.9125	0.00824308	1.48298
1000	he_10527	8361.29	131.182	5032.59	136.755	0	-0.732423
1010	he_10527	7205.83	80.1157	4476	210.523	0	-0.686954
1020	he_10527	7436.79	195.465	4464.34	176.291	0	-0.736233
1041	he_10552	12.0872	6.73438	323.685	38.9981	9.06419e-11	4.74304
1051	he_10552	13.8163	5.77831	323.599	50.0213	1.36707e-07	4.54976
1031	he_10552	34.9217	9.05909	296.824	42.3317	4.14905e-07	3.08741
1755	he_10636	143.446	21.0547	336.509	43.9776	0.00072041	1.23014
1745	he_10636	206.827	13.9788	388.172	55.3951	0.00551915	0.908272
1765	he_10636	172.807	18.2237	338.513	50.3741	0.00732762	0.970052
1590	he_11181	2186.92	81.937	201.085	30.1594	0	-3.44302
1610	he_11181	2058.35	94.0683	189.811	26.3295	0	-3.43886
1600	he_11181	1739.82	83.7566	176.555	25.4779	0	-3.30075
1082	he_11413	21.5348	8.84065	527.755	45.0778	0	4.61513
1062	he_11413	52.9973	8.23346	580.995	63.0376	2.29483e-13	3.45454
1072	he_11413	22.4506	6.3389	558.355	78.2883	7.04659e-10	4.63636
1103	he_11415	16.8143	7.49921	376.46	33.7552	1.11022e-16	4.48474
1093	he_11415	37.2991	7.05448	364.564	32.235	3.33067e-15	3.28896
1113	he_11415	11.1287	7.12645	379.297	44.6716	7.25131e-12	5.09097
2071	he_11553	662.179	31.2518	5368.37	134.623	0	3.01919
2061	he_11553	711.528	35.4993	5554.34	154.177	0	2.96462
2051	he_11553	880.947	52.2731	5828.66	245.893	0	2.72604
3342	he_11555	1437	37.6464	6422.66	224.055	0	2.16011
3322	he_11555	1819.07	85.0837	6400.78	220.388	0	1.81504
3332	he_11555	1491.28	62.2031	5748.1	259.137	0	1.94654
1206	he_11793	5705.47	142.296	4549.03	116.21	2.03436e-09	-0.326788
1196	he_11793	5596.01	138.028	4431.05	135.027	8.51481e-09	-0.33675
1186	he_11793	6413.29	112.827	5148.5	224.499	1.23757e-06	-0.316914
230	he_12051	22.039	5.6439	108.257	16.2751	0.000801289	2.29633
140	he_12202	1868.56	72.0889	5986.22	182.207	0	1.67972
150	he_12202	1817.97	50.1715	5147.79	152.408	0	1.50163
130	he_12202	1920.11	88.9009	6075.83	210.329	0	1.66189
3900	he_12203	48.7836	9.51716	184.456	29.8261	0.00063847	1.91881
3890	he_12203	61.5602	12.3537	199.796	30.0494	0.00072646	1.69846
605	he_12204	7861.58	217.91	15969.4	490.519	0	1.02242
615	he_12204	7310.09	296.106	14833.4	707.349	0	1.02089
595	he_12204	8195.13	258.127	15694.7	838.919	0	0.937436
2807	he_129	23.5931	9.68359	307.235	22.7315	0	3.70291
2817	he_129	22.8574	10.5549	334.524	38.8711	1.65659e-10	3.87137
2797	he_129	42.5312	8.40161	275.962	49.3436	6.46075e-05	2.69788
3435	he_13388	310.554	32.6823	857.258	45.9107	0	1.46488
3425	he_13388	313.326	27.0436	722.101	68.7401	6.61086e-07	1.20454
3415	he_13388	415.828	21.7716	877.363	95.5909	1.39753e-05	1.07719
1330	he_13555	5884.4	84.2483	1644.63	68.4297	0	-1.83913
1310	he_13555	6474.83	116.787	1829.81	93.8078	0	-1.82315
1320	he_13555	5852.67	139.029	1612.66	73.4565	0	-1.85965
1361	he_13758	11452.1	122.434	5225.08	187.99	0	-1.13208
1341	he_13758	13009.8	194.85	5919.78	188.671	0	-1.13598
1351	he_13758	11136.8	184.601	5258.32	220.369	0	-1.08266
1382	he_13856	12309.3	187.908	771.142	58.6336	0	-3.99661
1372	he_13856	13960.9	226.367	955.468	64.2537	0	-3.86904
1392	he_13856	12469	203.281	815.218	76.7283	0	-3.93501
1454	he_14017	27185.9	203.261	11446.9	264.848	0	-1.24791
1444	he_14017	26663.6	241.657	11729	271.77	0	-1.18479
1434	he_14017	31469.1	212.051	13098.4	446.612	0	-1.26455
2629	he_14115	2735.36	68.6415	7921.58	377.443	0	1.53406
2619	he_14115	2884.02	114.662	7308.64	315.028	0	1.34152
2609	he_14115	3555.62	111.393	8518.76	408.702	0	1.26054
1516	he_14386	136.117	19.4547	6170.72	82.9906	0	5.50252
1506	he_14386	149.43	21.4208	6507	175.037	0	5.44445
1496	he_14386	168.943	23.3156	7200.14	216.786	0	5.41342
1537	he_14393	20.5755	7.19285	1056.65	67.713	0	5.68243
1527	he_14393	60.4506	10.8014	1177.75	80.5228	0	4.28413
1547	he_14393	12.6521	11.0499	984.457	79.713	0	6.28188
726	he_14422	48.7572	18.4208	214.983	29.8162	0.000131641	2.14053
736	he_14422	41.0155	9.81276	206.746	34.6917	0.000194052	2.33362
716	he_14422	80.1459	9.92911	252.794	36.7771	0.00020508	1.65726
705	he_14423	3282.26	83.3064	18680.9	191.996	0	2.5088
695	he_14423	3511.06	148.953	21197.3	439.878	0	2.5939
685	he_14423	3846.36	109.577	21969.6	699.67	0	2.51394
3446	he_1492	312.163	33.4918	94.6008	17.9824	3.36115e-06	-1.72238
3466	he_1492	238.972	24.4995	87.9484	12.5785	3.20265e-05	-1.44211
3456	he_1492	230.427	21.8097	79.9305	17.1388	3.76733e-05	-1.52749
1999	he_1493	2244.49	69.437	6023.16	154.42	0	1.42413
2009	he_1493	2209.95	53.1093	5851.88	221.566	0	1.40489
1989	he_1493	2849.54	115.284	6267.66	374.273	0	1.1372
2567	he_15140	230.549	23.1133	901.055	90.5471	4.52046e-11	1.96654
2547	he_15140	328.258	37.0519	944.134	85.2175	1.18663e-09	1.52416
2557	he_15140	224.537	33.5859	826.359	86.3657	2.54229e-09	1.87981
2257	he_15142	9254.79	197.806	27077.2	433.09	0	1.54881
2247	he_15142	9565.6	213.327	24564.2	729.707	0	1.36063
2237	he_15142	12077.2	235.798	29371.5	865.008	0	1.28213
3528	he_15370	565.504	37.9915	1927.24	62.7922	0	1.76893
3518	he_15370	602.299	29.808	1802.48	98.9026	0	1.58143
3508	he_15370	700.873	29.5609	2221.06	144.954	0	1.66402
832	he_15398	195.874	26.7319	759.436	42.2942	0	1.955
822	he_15398	206.279	18.5194	865.174	61.2018	0	2.06839
812	he_15398	225.6	25.1943	821.773	118.816	4.21965e-06	1.86497
1095	he_15588	10769.6	158.86	197.697	22.892	0	-5.76753
1105	he_15588	9360.15	138.265	170.263	23.9141	0	-5.78069
1115	he_15588	10318.2	178.672	243.599	43.4187	0	-5.40455
1599	he_15624	280.511	21.0694	525.513	42.7267	1.23296e-05	0.905667
1589	he_15624	320.711	31.6336	577.627	56.1691	0.000411937	0.848863
1609	he_15624	265.316	16.1589	478.086	51.5893	0.000646195	0.849557
3156	he_15651	10994.4	193.143	30653.2	487.831	0	1.47926
3146	he_15651	11348.3	194.494	32271	746.954	0	1.50776
3136	he_15651	13876.3	406.522	30948.6	620.524	0	1.15725
2836	he_15653	8824.02	140.839	24748.9	539.015	0	1.48785
2846	he_15653	8258.74	170.008	22802.1	583.82	0	1.46517
2826	he_15653	10836.9	330.546	25125.8	927.754	0	1.21323
1620	he_15724	32564.1	333.059	29682	615.299	5.08003e-05	-0.133696
1640	he_15724	28066.6	311.093	26113.4	432.769	0.00033183	-0.104066
847	he_1586	9263.95	173.979	4460.2	114.391	0	-1.05452
867	he_1586	9011.43	175.682	4702.63	143.64	0	-0.938288
857	he_1586	8241.64	138.511	4375.63	231.588	0	-0.913442
1661	he_16347	7.45363	5.17801	146.923	16.9992	1.15221e-07	4.30097
1671	he_16347	4.32308	7.61934	112.61	24.7281	0.00160005	4.70313
1702	he_16349	40.6095	12.6891	2719.79	124.723	0	6.06553
1682	he_16349	64.4535	15.308	2953.84	170.69	0	5.51819
1692	he_16349	38.5038	10.6031	2826.28	173.559	0	6.19776
1764	he_16726	6325.67	119.701	2672.14	132.348	0	-1.24322
1744	he_16726	7030.23	233.791	2996.84	143.111	0	-1.23013
1754	he_16726	6324.16	212.87	2869.83	107.76	0	-1.13991
3683	he_17153	4653.05	81.4893	31088.5	266.878	0	2.74013
3663	he_17153	5878.97	149.362	36124.4	476.46	0	2.61934
3673	he_17153	4726.01	71.4237	35121.5	654.216	0	2.89366
1693	he_17291	3918.4	104.269	1289.34	92.7759	0	-1.60363
1703	he_17291	4259.56	113.548	1519.89	91.8769	0	-1.48673
1683	he_17291	4570.35	123.682	1437.92	120.214	0	-1.66832
1775	he_17407	59.6566	10.1927	791.389	43.6488	0	3.72963
1785	he_17407	34.7173	12.3056	749.864	56.6459	0	4.4329
1795	he_17407	24.1976	11.8367	703.993	70.4132	0	4.86263
1847	he_17441	107.059	16.1268	10092	192.714	0	6.55866
1857	he_17441	86.5159	16.0061	9570.67	205.382	0	6.78951
1837	he_17441	139.471	21.8482	11036.6	414.826	0	6.30618
3601	he_17477	845.193	31.5227	1946.65	61.4875	0	1.20364
3611	he_17477	731.737	56.4497	1730.34	85.7923	0	1.24166
3621	he_17477	760.084	52.9882	1660.22	79.5609	0	1.12715
1916	he_17478	152.425	18.6966	358.657	43.0291	0.000191192	1.2345
1906	he_17478	155.085	21.8593	375.228	53.9326	0.000926871	1.27471
1896	he_17478	193.533	19.4159	360.746	40.352	0.00164255	0.898402
161	he_17857	1043.08	63.4305	620.151	68.1199	3.45682e-05	-0.750156
181	he_17857	952.669	44.5698	551.058	76.6084	3.92015e-05	-0.789773
171	he_17857	992.562	61.9728	703.935	56.4381	0.00190401	-0.495715
1868	he_18129	528.845	28.322	95.6158	23.1454	0	-2.46752
1878	he_18129	453.336	25.6423	99.5624	16.7737	0	-2.18691
1888	he_18129	538.648	61.9887	90.6237	12.9835	5.34095e-10	-2.57138
1899	he_18225	24258.6	305.103	9658.76	184.928	0	-1.32858
1909	he_18225	20386.1	270.445	9167.75	211.965	0	-1.15295
1919	he_18225	20969.8	289.908	8894.72	246.006	0	-1.23729
1930	he_18278	29566.1	319.776	12212.1	259.872	0	-1.27564
1940	he_18278	24593.3	222.077	11776.8	208.273	0	-1.06232
1950	he_18278	25328	236.716	11254.7	276.257	0	-1.17021
1961	he_18955	608.973	47.3032	226.889	19.3044	1.75965e-10	-1.42439
1981	he_18955	578.786	37.3748	223.318	31.9298	8.54253e-10	-1.37393
1971	he_18955	528.155	41.8586	253.546	42.8438	6.60133e-05	-1.05871
2216	he_19454	7992.04	123.738	1722.16	63.3045	0	-2.21435
2226	he_19454	7712.98	167.468	1830.15	66.9371	0	-2.07532
2206	he_19454	9521.52	216.582	2030.14	157.906	0	-2.22962
2064	he_19742	20998.6	148.265	9688.31	148.666	0	-1.11597
2074	he_19742	21605.3	157.459	9554.23	164.957	0	-1.17718
2054	he_19742	25405.6	339.348	10089.2	157.329	0	-1.33234
3189	he_1991	18341.5	244.929	8137.75	239.865	0	-1.17241
3179	he_1991	18745.2	200.385	8631.98	289.69	0	-1.11876
3169	he_1991	21809.6	440.615	8610.75	254.608	0	-1.34075
2085	he_20008	6262.2	109.138	2544.11	112.199	0	-1.29951
2105	he_20008	5535.88	128.052	2449.48	125.426	0	-1.17634
2095	he_20008	5387.35	114.17	2472.97	137.847	0	-1.12333
2178	he_20151	19059.3	188.055	6539.5	248.322	0	-1.54324
2198	he_20151	16065.5	155.575	6451.06	197.756	0	-1.31636
2188	he_20151	15781.3	236.878	6454.25	208.105	0	-1.28989
2209	he_20180	1832.01	89.0043	818.954	42.8028	0	-1.16157
2219	he_20180	1537.62	74.688	704.55	40.4579	0	-1.12593
2229	he_20180	1587.77	61.5741	726.782	64.9072	0	-1.12741
2260	he_20181	1242.42	50.0126	84.2369	15.4946	0	-3.88256
2250	he_20181	1259.15	56.1056	88.3106	19.5591	0	-3.83372
2240	he_20181	1505.79	85.2914	102.085	18.5087	0	-3.88268
571	he_20271	1241.76	68.9642	277.879	25.375	0	-2.15986
561	he_20271	1354.12	77.8794	334.659	51.8438	0	-2.0166
581	he_20271	1223.23	89.0357	310.417	27.9785	0	-1.97842
785	he_2031	13686.4	199.363	800.222	38.312	0	-4.09619
805	he_2031	13185.2	226.559	867.786	66.9779	0	-3.92544
795	he_2031	12276.1	270.668	764.132	84.7204	0	-4.00589
3714	he_20374	9432.46	109.4	27902.4	225.618	0	1.56468
3704	he_20374	9707.43	132.329	31599.6	501.668	0	1.70274
3694	he_20374	11823.9	216.786	31447	797.905	0	1.41121
592	he_2066	183.418	21.007	22.8778	6.89584	1.93039e-07	-3.00312
612	he_2066	168.322	15.1673	26.8774	13.0817	8.71027e-07	-2.64675
602	he_2066	152.64	31.4079	22.1974	13.3036	0.00240501	-2.78167
2302	he_20870	100.241	14.1893	15.5026	5.36365	0.000394353	-2.69289
2333	he_20896	5172.46	88.8488	2859.86	155.406	0	-0.854907
2343	he_20896	4316.61	65.1976	2766.21	132.372	0	-0.641988
2353	he_20896	4399.72	136.473	2753.68	113.683	0	-0.676052
2364	he_20915	365.427	30.9312	175.971	26.0016	0.000119841	-1.05424
2405	he_20919	7429.94	114.202	2114.27	75.4328	0	-1.81319
2415	he_20919	7568.39	104.195	2231.17	111.434	0	-1.76218
2395	he_20919	8967.48	167.487	2098.67	148.444	0	-2.09523
2426	he_20922	151.438	15.9594	25.061	13.201	1.78363e-05	-2.59521
2446	he_20922	110.111	15.7592	28.0143	8.29057	0.00201129	-1.97472
2436	he_20922	112.456	19.8773	30.0021	6.48832	0.00553012	-1.90623
2457	he_20936	759.246	34.1143	249.126	22.606	0	-1.60769
2477	he_20936	641.09	40.2572	228.658	33.1562	1.30197e-11	-1.48733
2467	he_20936	679.914	57.3651	262.114	29.0327	1.11447e-08	-1.37516
991	he_20939	6050.56	63.6109	666.576	51.2023	0	-3.18223
971	he_20939	6207.6	120.343	574.989	43.9545	0	-3.43243
981	he_20939	5285.75	134.435	518.073	56.3684	0	-3.35088
2529	he_20968	8104.98	106.295	3023.89	150.476	0	-1.4224
2519	he_20968	9636.84	188.01	3074.11	183.937	0	-1.64839
2539	he_20968	7338.99	440.449	3170.59	100.97	0	-1.21083
2092	he_21018	424.895	32.7881	93.2212	16.994	3.78031e-13	-2.18838
2102	he_21018	438.104	31.9482	78.9842	29.4922	6.2047e-12	-2.47164
2082	he_21018	488.875	58.3164	83.6319	17.5499	6.19606e-09	-2.54734
2550	he_21059	38.7292	8.79194	2641.33	144.439	0	6.0917
2560	he_21059	28.842	7.67229	2536.45	143.539	0	6.4585
2570	he_21059	24.948	11.831	2569.92	151.952	0	6.68666
3191	he_21561	35131.5	427.863	18901.1	371.67	0	-0.894299
3181	he_21561	33469.6	452.676	18846.4	297.686	0	-0.828562
3171	he_21561	40787.5	562.615	20318.9	526.783	0	-1.0053
2591	he_21566	10154.3	131.869	816.438	46.2204	0	-3.6366
2581	he_21566	12081.9	169.72	806.279	40.7494	0	-3.90542
2601	he_21566	10191.6	141.692	818.197	74.0452	0	-3.63879
3780	he_21594	69.7831	15.5221	501.595	38.7767	0	2.84557
3760	he_21594	84.7975	12.0266	415.5	33.0438	3.75255e-14	2.29275
3770	he_21594	58.9686	12.144	423.347	44.7713	3.12587e-11	2.84382
3220	he_2174	1451.98	126.792	182.662	28.1641	0	-2.99077
3210	he_2174	1749.44	216.353	261.45	44.2371	9.9582e-11	-2.74229
3200	he_2174	1499.83	269.527	167.74	58.6257	3.07638e-06	-3.1605
2632	he_21871	1	3.22592	1836.01	111.703	0	10.8424
2622	he_21871	1	2.3096	1648.12	203.169	6.21725e-15	10.6866
2663	he_21872	37.3551	12.0905	1530.39	71.6208	0	5.35645
2653	he_21872	47.1653	12.5412	1394.92	78.1017	0	4.88631
2643	he_21872	51.7077	9.88409	1504.38	107.093	0	4.86265
2694	he_21873	127.724	18.1124	6770.16	174.96	0	5.72808
2674	he_21873	159.43	14.9988	6746.19	206.318	0	5.40308
2684	he_21873	104.543	12.9047	6109.3	217.702	0	5.86884
437	he_21878	1256.43	56.7297	370.465	51.1168	0	-1.76193
447	he_21878	1183.23	67.721	370.018	37.6356	0	-1.67706
457	he_21878	1100.56	65.9789	345.469	41.8208	0	-1.6716
2756	he_21967	5308.79	84.1152	1990.31	41.5115	0	-1.41539
2736	he_21967	6185.8	123.696	2033.48	100.191	0	-1.60501
2746	he_21967	5267.22	128.339	1769.09	87.8019	0	-1.57403
2777	he_22155	4.46239	8.63414	102.457	14.812	0.000133547	4.52106
2787	he_22155	7.07142	7.39065	96.8041	18.1241	0.00137723	3.775
2767	he_22155	19.6699	8.62	92.235	17.5352	0.00949601	2.22932
2808	he_22404	2.79765	3.79341	212.918	27.1041	4.77332e-09	6.24994
2798	he_22404	13.0129	4.88121	197.819	25.0106	5.46535e-08	3.92617
2839	he_22545	6.01203	7.9606	79.4457	15.2968	0.00429274	3.72404
2849	he_22545	3.41139	5.72806	75.8566	17.2782	0.00657705	4.47484
2860	he_22725	2604.02	85.5987	1413.79	85.8683	0	-0.881171
2870	he_22725	2233.13	80.1358	1295.27	49.2399	0	-0.785811
2880	he_22725	2315.92	50.6163	1373.71	87.1584	0	-0.753505
2942	he_23347	1003.99	55.5802	442.693	39.3214	2.87881e-13	-1.18137
2922	he_23347	1131.21	85.1982	461.694	28.9626	1.26941e-11	-1.29286
2932	he_23347	894.339	50.9855	399.497	49.2548	5.44198e-10	-1.16264
2953	he_23413	14389.4	115.19	3025.26	141.777	0	-2.24987
2963	he_23413	12041.2	147.608	2720.86	167.048	0	-2.14584
2973	he_23413	12541.5	253.074	2676.67	101.645	0	-2.2282
3004	he_23428	5947.63	133.941	2674.57	116.666	0	-1.15301
2984	he_23428	6676.28	173.206	2952.86	128.653	0	-1.17693
2994	he_23428	5738.83	136.972	2615.83	122.146	0	-1.13349
2485	he_23458	1208.88	60.6532	533.62	40.9583	2.22045e-16	-1.17979
2505	he_23458	818.77	52.0197	485.78	23.33	4.2846e-07	-0.753155
2495	he_23458	877.684	62.4706	433.543	69.3059	1.42505e-05	-1.01753
3262	he_2348	6496.78	130.933	594.521	48.7988	0	-3.44993
3282	he_2348	5500.47	115.667	595.65	42.4978	0	-3.20702
3272	he_2348	5606.51	165.707	622.844	68.2014	0	-3.17016
3015	he_23737	229.9	19.7284	69.0768	16.6655	3.30599e-06	-1.73473
3035	he_23737	234.905	33.2468	68.6968	19.6757	0.000465775	-1.77376
3025	he_23737	198.828	30.3693	80.0132	12.3376	0.00434121	-1.31321
3303	he_2388	2072.09	63.3613	437.006	30.7197	0	-2.24536
3313	he_2388	1992.36	65.1314	391.608	45.1428	0	-2.347
3293	he_2388	2297.48	106.108	387.473	55.6954	0	-2.56789
3887	he_24	9290.71	146.6	18471.6	248.765	0	0.991451
3897	he_24	8428.1	72.754	19864.9	413.593	0	1.23694
3877	he_24	10534.4	219.772	21168.9	511.505	0	1.00684
3128	he_24277	1	6.9457	174.72	31.8734	2.32527e-05	7.4489
3108	he_24277	18.0618	7.21391	154.842	25.4811	9.10859e-05	3.09978
3118	he_24277	8.1115	11.7063	152.901	36.5865	0.00196617	4.23648
3139	he_24403	785.995	51.5721	376.027	28.336	1.36956e-09	-1.06368
3149	he_24403	707.198	59.1199	377.338	58.7005	0.00035622	-0.906257
3159	he_24403	728.29	73.485	379.001	55.2178	0.000546877	-0.942311
202	he_24677	195.793	22.5559	1586.09	68.3702	0	3.01808
212	he_24677	170.503	19.6663	1322.63	69.411	0	2.95555
192	he_24677	186.478	25.9711	1545.32	104.626	0	3.05083
3242	he_24979	1040.09	74.8721	1686.22	97.047	7.72886e-07	0.697081
3252	he_24979	1071.53	52.6149	1711.38	121.195	5.0352e-06	0.675491
3232	he_24979	1150.94	68.9655	1787.26	130.287	4.21791e-05	0.634939
26	he_24981	6511.3	159.883	4300.42	181.673	0	-0.598468
6	he_24981	6853.18	103.853	4729.91	234.102	1.22125e-15	-0.534962
16	he_24981	6722.48	79.0907	5055.63	196.523	4.58522e-14	-0.411102
3835	he_25	389.823	35.5094	3026.18	95.3129	0	2.95661
3825	he_25	398.988	34.6411	3000.02	120.207	0	2.91056
3815	he_25	474.758	32.085	3622.82	193.125	0	2.93185
574	he_25080	13099.5	184.891	31592.7	636.702	0	1.27008
584	he_25080	12272.6	209.197	28827.8	711.437	0	1.23202
564	he_25080	13752.6	253.776	32165.8	1014.8	0	1.22582
2350	he_25081	7124.54	190.764	20042.9	418.251	0	1.49222
2340	he_25081	7363.96	145.182	18173.1	493.561	0	1.30325
2330	he_25081	9014.92	263.656	21351.3	731.221	0	1.24394
550	he_25083	11184.8	145.168	26005.6	346.014	0	1.21728
540	he_25083	11870.7	151.059	29199.4	677.242	0	1.29853
530	he_25083	12763	168.916	30025	811.413	0	1.23419
2857	he_25098	302.777	28.2706	80.509	14.2961	3.85768e-08	-1.91103
2877	he_25098	200.771	23.5447	75.4017	9.88592	0.000259629	-1.41288
2867	he_25098	249.372	29.3522	99.7344	22.702	0.00113519	-1.32214
3373	he_25099	13102.2	126.336	53325.9	483.769	0	2.02502
3363	he_25099	13665	145.63	48202.2	479.826	0	1.81862
3353	he_25099	17178.1	282.185	56350.1	1749.32	0	1.71385
3859	he_25100	582.754	25.0055	169.915	17.1342	0	-1.77808
3849	he_25100	672.515	42.0613	169.816	27.0037	0	-1.98559
3869	he_25100	525.552	32.0589	139.814	25.6014	9.10383e-15	-1.91032
88	he_25101	11862.8	213.093	39908.1	271.353	0	1.75024
68	he_25101	13138.6	231.885	43704.6	362.845	0	1.73398
78	he_25101	12401.3	223.801	45310.5	1377.67	0	1.86935
1263	he_25103	10627.1	182.438	41591.6	314.732	0	1.96854
1253	he_25103	11345.5	133.767	45417.8	819.511	0	2.00114
1243	he_25103	13533.8	291.867	49925	859.303	0	1.88319
357	he_25328	127.921	13.697	426.072	39.5316	3.11234e-09	1.73584
347	he_25328	132.021	20.6686	379.555	33.3512	2.11381e-07	1.52354
367	he_25328	134.57	20.0952	381.896	35.8361	5.96173e-07	1.50482
3273	he_25375	5597.44	104.381	2438.2	124.346	0	-1.19895
3283	he_25375	5772.52	151.166	2398.94	118.237	0	-1.26681
3263	he_25375	6403.38	199.707	2461.69	123.155	0	-1.37919
3766	he_25409	3393.84	43.3852	15019.3	246.511	0	2.14583
3776	he_25409	3200.53	69.1528	13333.8	208.612	0	2.05871
3756	he_25409	4087.12	120.205	14595.2	659.176	0	1.83634
3335	he_25586	19.0365	6.26609	1967.18	80.479	0	6.69121
3345	he_25586	35.4624	11.8462	1901.75	115.306	0	5.74489
3325	he_25586	43.0623	11.0119	1917.28	139.478	0	5.47649
3366	he_25588	18.018	14.5501	831.537	45.4811	0	5.52827
3356	he_25588	37.0213	7.20343	863.426	54.0842	0	4.54365
3376	he_25588	19.7591	11.4373	825.341	68.1009	0	5.3844
1622	he_25668	21714.6	277.646	8085.62	200.364	0	-1.42524
1632	he_25668	18293.9	185.562	7691.96	237.852	0	-1.24994
1642	he_25668	20307.1	379.73	8536.41	236.669	0	-1.25028
3397	he_25669	1368.55	51.9171	247.78	29.4883	0	-2.46552
3407	he_25669	1407.66	68.5791	232.009	41.2063	0	-2.60104
3387	he_25669	1636.22	105.862	230.924	29.5795	0	-2.82488
3418	he_25673	1535.63	60.0726	276.938	41.749	0	-2.47119
3428	he_25673	1343.06	63.2941	289.525	23.4481	0	-2.21376
3438	he_25673	1350.03	69.4472	246.289	25.0867	0	-2.45457
3459	he_25674	4521.49	80.6624	375.66	57.115	0	-3.5893
3469	he_25674	4562.97	115.775	350.591	35.2456	0	-3.70211
3449	he_25674	5171.78	244.471	364.717	48.4262	0	-3.82581
3490	he_25676	1385.08	63.254	357.126	30.7	0	-1.95547
3500	he_25676	1479.43	77.8582	356.835	44.5416	0	-2.05172
3480	he_25676	1622.2	98.9833	347.501	43.1944	0	-2.22286
3511	he_25688	321.608	36.2631	76.4891	17.3584	5.65624e-07	-2.07198
3521	he_25688	283.297	24.8812	89.8925	17.9342	9.37592e-07	-1.65604
3531	he_25688	284.508	27.287	86.749	16.6992	1.22506e-06	-1.71355
1529	he_25690	21696.3	221.811	13500.4	234.143	0	-0.684452
3562	he_25690	17202	163.876	12747.6	181.305	0	-0.432348
1549	he_25690	19975.8	248.745	14025.3	216.106	0	-0.510216
3542	he_25690	20176.3	197.708	13182.8	353.963	0	-0.614011
3552	he_25690	16898.9	212.951	12161.1	251.195	0	-0.474654
1539	he_25690	18118.6	350.962	12976.7	263.51	0	-0.481553
3604	he_25699	12164.9	263.722	6869.44	224.29	0	-0.824464
3624	he_25699	10873.2	251.76	7006.63	193.514	0	-0.633987
3614	he_25699	10775.1	215.47	6789.95	269.299	0	-0.666232
3655	he_25704	845.921	48.8439	84.3091	16.8473	0	-3.32676
3635	he_25704	943.441	60.2834	85.6361	12.3519	0	-3.46164
3645	he_25704	841.006	51.5243	94.0268	15.683	0	-3.16097
3666	he_25712	10682.2	168.851	1250.5	84.2584	0	-3.09463
3686	he_25712	9829.41	150.81	1344.3	95.1857	0	-2.87025
3676	he_25712	9362.54	235.398	1290	75.8966	0	-2.85953
1663	he_25728	877.766	45.4516	83.2508	20.0886	0	-3.3983
3717	he_25728	1887.07	117.417	200.092	36.3737	0	-3.23741
3707	he_25728	1799.43	118.82	204.064	47.1562	0	-3.14045
1673	he_25728	1089.7	91.293	94.6393	18.4282	0	-3.52535
3697	he_25728	1867.03	163.462	176.87	35.3372	0	-3.39998
1653	he_25728	959.905	81.5302	83.6637	18.8613	0	-3.52022
3748	he_25733	1554.59	85.622	65.8064	18.7748	0	-4.56216
3738	he_25733	1288.5	74.3773	80.4678	17.8443	0	-4.00113
3728	he_25733	1462.27	92.1684	81.2846	22.6117	0	-4.16908
1694	he_25733	746.372	45.9427	33.6218	15.1958	0	-4.47242
1684	he_25733	870.174	72.7176	34.5987	6.42998	0	-4.65251
1704	he_25733	972.312	96.7143	52.9319	20.435	0	-4.19921
1591	he_25747	28109.3	246.207	22014.1	280.485	0	-0.352618
1611	he_25747	26249.3	289.208	22681.3	308.534	1.11022e-16	-0.210776
3759	he_25747	27076.4	228.064	23007.1	596.402	3.59398e-10	-0.234954
1601	he_25747	23465	412.375	21226.3	336.047	3.7238e-05	-0.144658
3779	he_25747	23041.5	232.034	21605	345.698	0.000771565	-0.0928663
1560	he_25748	4253.54	100.642	2417.62	62.9259	0	-0.815076
1580	he_25748	4200.31	140.009	2523.89	104.494	0	-0.734843
3810	he_25748	3804.6	115.313	2505.55	107.114	5.77316e-15	-0.60262
1570	he_25748	3751.51	133.297	2225.82	158.944	1.86873e-12	-0.753135
3790	he_25748	4263.5	138.582	2770.24	173.797	1.12157e-10	-0.62203
3800	he_25748	3424.01	139.035	2340.37	133.412	8.07136e-08	-0.548953
3831	he_25753	589.158	34.1755	1028.34	56.6605	3.88424e-09	0.80359
3841	he_25753	622.065	24.4424	1048.31	74.076	7.9129e-07	0.752923
3821	he_25753	682.971	52.3918	1062.85	63.0141	2.53873e-05	0.63804
3852	he_25776	11908.3	124.201	3605.79	153.95	0	-1.72358
3872	he_25776	10264	136.489	3446.66	91.273	0	-1.57432
3862	he_25776	10103.3	165.432	3539.06	212.783	0	-1.51339
3903	he_25777	181.46	15.4801	27.9341	12.0074	5.8421e-08	-2.69955
3883	he_25777	236.698	31.1812	33.0624	11.7938	1.32856e-06	-2.83978
3893	he_25777	153.837	18.0145	26.4246	10.3293	1.57673e-05	-2.54145
3934	he_26079	37.9845	8.91309	111.971	16.4552	0.00646053	1.55965
754	he_26104	2019.46	72.337	784.333	45.3259	0	-1.36443
774	he_26104	1859.52	70.5886	847.128	56.8455	0	-1.13428
764	he_26104	1778.21	71.0396	766.967	76.2605	0	-1.21319
3955	he_26137	10421.3	142.632	880.237	65.9274	0	-3.5655
3945	he_26137	12025.7	234.334	900.357	86.2703	0	-3.73947
3965	he_26137	10439.7	200.885	892.358	113.561	0	-3.54831
29	he_26246	21143.4	265.539	5041.24	129.901	0	-2.06836
19	he_26246	20283	237.424	4606.87	180.476	0	-2.13841
9	he_26246	21804.6	333.803	4882.83	124.18	0	-2.15884
71	he_26307	19920.6	273.494	25450.6	247.787	0	0.353439
91	he_26307	19119.6	176.927	26028.5	459.462	0	0.445037
81	he_26307	18393.8	325.073	24769.4	492.422	0	0.429339
233	he_26314	127.584	15.5971	280.573	43.6242	0.0050914	1.13693
102	he_26540	24927.7	317.693	6596.3	128.825	0	-1.91802
122	he_26540	23848.4	273.422	6834.65	171.494	0	-1.80295
112	he_26540	22786.9	238.904	6508.83	303.51	0	-1.80773
133	he_26559	645.997	26.9382	84.8345	12.021	0	-2.9288
153	he_26559	627.092	31.8521	93.6249	12.6346	0	-2.74371
143	he_26559	541.319	23.4343	74.8182	17.9576	0	-2.85502
955	he_26755	731.002	55.3926	5234.33	92.2678	0	2.84006
945	he_26755	802.476	45.0951	5776.03	185.857	0	2.84755
935	he_26755	941.329	54.1343	5580.66	295.671	0	2.56766
1566	he_27079	23.6222	9.74258	642.487	54.1814	0	4.76545
1576	he_27079	19.8361	8.27332	595.17	53.4253	0	4.9071
1556	he_27079	40.9902	9.75402	583.057	55.4467	1.11022e-16	3.83028
1587	he_27218	6619.87	101.985	405.457	28.2153	0	-4.02918
1597	he_27218	5718.74	150.711	486.729	34.5216	0	-3.55451
1607	he_27218	5461.48	204.049	408.93	37.6821	0	-3.73937
3548	he_27228	37.3311	10.1903	111.362	16.8035	0.00840809	1.5768
1441	he_27523	65.987	11.6834	471.933	57.5206	1.47326e-09	2.83833
1451	he_27523	61.9616	14.4576	430.585	51.4739	2.61611e-09	2.79685
1431	he_27523	88.7836	16.9755	437.729	51.2798	2.30108e-08	2.30167
2577	he_27671	3347.21	93.6472	2297.73	172.934	3.48776e-07	-0.542753
2587	he_27671	2580.48	87.1567	2091.57	127.493	0.00287327	-0.303051
1618	he_27706	9056.96	182.51	3268.8	198.518	0	-1.47027
1628	he_27706	7823.42	180.401	3493.3	96.141	0	-1.16321
1638	he_27706	7648.68	179.564	3206.75	181.152	0	-1.2541
1090	he_27875	840.382	49.5684	604.841	49.649	0.0029543	-0.47449
3300	he_27876	2500.83	56.8147	891.819	80.289	0	-1.48758
3310	he_27876	2387.88	80.2956	1013.01	65.1819	0	-1.23708
3290	he_27876	2709.33	215.121	949.368	98.8392	8.33889e-13	-1.51289
1731	he_28378	15380.1	178.227	6003.34	176.671	0	-1.35722
1721	he_28378	15638.7	237.25	6625.31	137.946	0	-1.23906
1711	he_28378	18708.1	372.341	6185.89	171.273	0	-1.59661
1752	he_28451	10238.6	127.948	1196.73	48.1627	0	-3.09686
1742	he_28451	12035.8	213.002	980.817	77.1182	0	-3.6172
1762	he_28451	9911.07	229.645	1035.74	99.1911	0	-3.25838
3029	he_28473	65.5477	13.3882	19238.5	201.28	0	8.19723
3009	he_28473	117.832	15.5462	23075.2	441.977	0	7.61347
3019	he_28473	80.7171	16.1653	19781.9	382.992	0	7.93709
1793	he_28474	510.038	43.7166	37284.1	382.189	0	6.19181
1783	he_28474	510.222	33.2332	40628.6	470.11	0	6.31523
1773	he_28474	615.055	58.5139	37403.6	748.973	0	5.92632
1804	he_28476	203.087	21.2624	10502.3	184.68	0	5.69246
1814	he_28476	159.111	16.081	11508.1	238.584	0	6.17647
1824	he_28476	138.812	21.1463	10492.5	268.065	0	6.24008
1876	he_28480	426.348	33.3513	17360.3	256.069	0	5.34761
1886	he_28480	392.207	38.034	15813.7	312.002	0	5.33342
1866	he_28480	536.932	50.4881	16176.4	454.504	0	4.91301
1917	he_28482	478.213	41.7394	28580.2	418.76	0	5.90122
1907	he_28482	488.261	33.7394	30333.4	466.147	0	5.95711
1897	he_28482	616.409	43.0278	28656.8	437.618	0	5.53885
1948	he_28483	21.8408	7.91186	1931.62	65.4921	0	6.46664
1938	he_28483	29.6661	12.48	2108.35	114.186	0	6.15115
1928	he_28483	46.0646	10.0613	1866.18	150.465	0	5.34029
3248	he_28711	2672.92	59.1025	11723.3	269.349	0	2.13289
3228	he_28711	3480.79	136.783	12974.7	346.229	0	1.89822
3238	he_28711	2784.8	110.422	11141.8	364.779	0	2.00033
1969	he_28713	1680.06	88.9581	10289.8	254.276	0	2.61463
1979	he_28713	1594.5	71.2858	10021.7	312.707	0	2.65195
1959	he_28713	1962.51	78.1383	9678.37	305.831	0	2.30207
1017	he_28825	2107.53	76.4004	16960.6	367.897	0	3.00856
1007	he_28825	2179.69	80.6956	18596	432.651	0	3.0928
997	he_28825	2388.2	77.0174	16806.1	416.666	0	2.81499
645	he_28827	471.653	41.3836	15376.8	317.826	0	5.02688
625	he_28827	516.364	55.4845	15861.2	353.08	0	4.94097
635	he_28827	472.197	41.0476	16382.5	555.519	0	5.11662
1990	he_28866	17989.2	251.601	4784.31	193.751	0	-1.91075
2000	he_28866	14935.8	136.778	5133.7	200.187	0	-1.5407
2010	he_28866	14486.3	212.726	4948.2	153.069	0	-1.54972
711	he_28961	2602.72	98.1452	751.534	63.0835	0	-1.79211
691	he_28961	2684.9	119.539	716.9	55.3522	0	-1.90503
701	he_28961	2290.61	99.3868	678.09	75.9183	0	-1.75618
2041	he_28969	8056.54	125.658	138.713	23.7562	0	-5.85999
2031	he_28969	7881.09	122.79	183.856	23.1023	0	-5.42175
2021	he_28969	9477.11	226.999	135.592	27.1233	0	-6.1271
2052	he_29126	8472.96	132.175	2332.41	116.114	0	-1.86104
2062	he_29126	7257.09	129.437	2534.78	104.747	0	-1.51753
2072	he_29126	7086.4	179.427	2391.87	123.983	0	-1.56691
3355	he_2914	5394.48	88.0898	1322.75	92.7806	0	-2.02795
3365	he_2914	4711.61	83.0307	1340.27	65.2929	0	-1.8137
3375	he_2914	4594.2	105.597	1285.36	101.356	0	-1.83765
82	he_29304	4289.08	91.2041	683.587	42.6148	0	-2.64947
92	he_29304	4680.22	104.552	754.242	53.3023	0	-2.63348
72	he_29304	4619.48	129.189	691.458	60.8002	0	-2.74002
3396	he_2937	44.2029	9.57901	2428.88	120.043	0	5.78
3386	he_2937	58.3932	12.4453	2239.96	136.874	0	5.26153
3406	he_2937	44.323	18.4597	2304.08	155.35	0	5.69999
2114	he_29411	17017.3	255.943	5114.42	149.503	0	-1.73436
2124	he_29411	14281.1	124.88	5405.64	180.723	0	-1.40157
2134	he_29411	13711.4	206.183	5189.84	173.559	0	-1.40162
3195	he_29521	33508.4	436.155	63895	468.803	0	0.93118
3205	he_29521	26695	397.429	60538.5	693.548	0	1.18128
3215	he_29521	23916.3	264.179	65375.6	1142.73	0	1.45076
2145	he_29648	9094.26	173.47	833.347	88.2399	0	-3.44797
2165	he_29648	7321.03	125.32	906.428	109.565	0	-3.01378
2155	he_29648	7504.38	186.269	955.245	86.6313	0	-2.97379
3427	he_2975	22137.2	220.094	13390.5	221.373	0	-0.725266
3417	he_2975	25845.3	550.592	13754.2	322.322	0	-0.910029
3437	he_2975	21079.2	217.339	14214.4	302.914	0	-0.568469
2186	he_29964	11403.3	142.174	856.898	51.7757	0	-3.73418
2196	he_29964	10947.4	177.381	863.331	44.6941	0	-3.66453
2176	he_29964	13671.9	308.745	832.651	74.2803	0	-4.03736
428	he_29970	4038.81	142.673	22894.1	383.182	0	2.50297
418	he_29970	4367.08	76.6303	25628.3	577.435	0	2.553
408	he_29970	4612.69	179.16	23497	516.584	0	2.34879
2238	he_30317	8331.36	194.769	3063.56	172.289	0	-1.44334
2248	he_30317	7060.35	120.047	3169.4	159.149	0	-1.15553
2258	he_30317	6810.33	120.808	3432.79	217.738	0	-0.988343
604	he_30405	233.447	17.2958	1118.85	61.4601	0	2.26085
594	he_30405	249.675	25.2155	1185.09	70.4417	0	2.24688
614	he_30405	233.04	29.7372	1087.03	68.623	0	2.22174
2289	he_30566	7545.54	108.994	945.405	81.215	0	-2.99662
2269	he_30566	9466	197.986	973.068	79.462	0	-3.28214
2279	he_30566	8009.43	169.505	1001.55	84.3217	0	-2.99947
2310	he_30695	22230.5	196.444	14177.1	272.671	0	-0.648978
2300	he_30695	26749.4	269.911	15098.3	435.547	0	-0.825122
2320	he_30695	20597.9	354.232	15413.6	433.551	0	-0.418294
2341	he_30831	8780.93	130.07	3271.41	161.398	0	-1.42446
2331	he_30831	10252.3	216.239	3343.75	160.107	0	-1.61641
2351	he_30831	8576.31	212.052	3489.83	185.319	0	-1.2972
2372	he_30884	5415.26	133.061	1434.01	62.0202	0	-1.91698
2362	he_30884	6560.19	183.125	1485.62	117.448	0	-2.14267
2382	he_30884	5272.82	128.592	1542.85	113.552	0	-1.77297
2403	he_30889	6038.96	110.466	4861.53	174.761	5.04685e-08	-0.312889
2393	he_30889	7137.52	205.9	5326.27	272.408	2.51833e-07	-0.422299
2434	he_30905	3824.68	77.9301	2324.2	77.8148	0	-0.718605
2424	he_30905	4544.63	118.111	2422.85	154.229	0	-0.907461
2444	he_30905	3719.96	116.866	2462.19	93.64	2.33147e-15	-0.595349
2455	he_31014	1340.01	46.4998	2879.64	108.638	0	1.10364
2465	he_31014	1123.14	40.4289	2706.96	119.176	0	1.26914
2475	he_31014	1081.55	42.0434	2892.71	178.49	0	1.41932
2496	he_31018	70.6318	12.3553	599.047	40.9736	0	3.08428
2486	he_31018	91.6404	13.8178	617.65	40.8129	0	2.75273
2506	he_31018	52.5334	13.0783	600.346	43.412	0	3.51449
2527	he_31019	1	1.6309	261.819	53.0235	2.02225e-05	8.03243
2537	he_31019	1	3.07993	211.277	54.3241	0.000754761	7.72299
2568	he_31029	18.3454	9.57671	2204.56	91.6261	0	6.90893
2548	he_31029	41.4308	6.42762	2346.82	147.984	0	5.82386
2558	he_31029	34.4342	13.4568	1943.04	151.317	0	5.81833
2589	he_31030	143.204	20.7531	14278.2	154.567	0	6.63961
2599	he_31030	131.926	15.2597	15568.6	215.216	0	6.88276
2579	he_31030	177.171	13.1074	17277.6	542.908	0	6.60762
2630	he_31031	29.9361	9.67651	3122.03	96.2525	0	6.70445
2620	he_31031	30.9547	10.2193	2846.05	90.1276	0	6.52266
2610	he_31031	56.132	12.3045	3425.19	152.546	0	5.93122
2661	he_31032	151.263	22.3529	14003.6	286.619	0	6.5326
2651	he_31032	170.172	23.357	13426	283.072	0	6.30189
2641	he_31032	194.499	21.1948	16685.3	490.893	0	6.42267
2692	he_31033	11.2825	11.7683	497.402	43.3372	0	5.46226
2682	he_31033	16.4854	9.38705	497.735	49.7573	4.44089e-16	4.91612
2672	he_31033	37.5221	11.404	566.52	58.893	1.09912e-14	3.91631
2713	he_31035	19107	180.205	7685.59	145.313	0	-1.31387
2723	he_31035	17761.2	157.414	7720.77	186.708	0	-1.20191
2703	he_31035	22841.2	373.134	9068.19	225.069	0	-1.33275
2990	he_31077	53.4161	12.4692	203.737	32.549	0.000512016	1.93136
3000	he_31077	44.9164	14.3699	165.507	22.32	0.000569174	1.88158
2754	he_31383	26.3342	10.1106	540.819	21.6381	0	4.36014
2744	he_31383	31.157	16.0249	527.851	51.4769	1.77636e-15	4.0825
2734	he_31383	49.3591	10.8894	602.788	65.1065	1.06803e-13	3.61026
1513	he_31641	9969.62	183.504	24657.7	428.013	0	1.30643
1503	he_31641	10334	187.978	27729.1	537.335	0	1.424
1493	he_31641	12190.8	143.357	25668	489.228	0	1.07417
3073	he_31698	833.285	61.4943	80.2318	25.3952	0	-3.37657
3093	he_31698	642	48.3323	87.1572	29.3254	0	-2.88088
3083	he_31698	682.317	59.0889	77.645	30.9337	1.11022e-15	-3.13548
3563	he_32	1349.01	55.4831	76.0168	16.0972	0	-4.14943
3553	he_32	1215.12	57.3853	67.7438	24.2363	0	-4.16487
3543	he_32	1476.76	102.652	81.6943	11.5925	0	-4.17606
2936	he_32353	86.1988	16.2445	3476.26	90.3026	0	5.33372
2916	he_32353	126.11	17.4344	4414.06	139.645	0	5.12935
2926	he_32353	80.4813	9.74235	3823.46	178.011	0	5.57008
1038	he_32394	10627	167.018	31142	604.688	0	1.55113
1048	he_32394	10078.3	148.365	27540.1	517.386	0	1.45027
1028	he_32394	12288.3	214.048	29088.6	613.512	0	1.24317
2816	he_32726	5465.33	117.539	2238.89	73.7807	0	-1.28753
2806	he_32726	5563.7	115.277	2332.65	94.689	0	-1.25408
2796	he_32726	6471.54	166.439	2708.8	97.2722	0	-1.25646
2858	he_33125	72.1281	11.285	2.93493	5.60477	0.00118485	-4.61917
2909	he_33216	7123.38	113.351	4035.3	165.325	0	-0.819885
2889	he_33216	8854.45	138.844	4811.44	238.161	0	-0.879932
2899	he_33216	7414.73	111.224	4558.04	177.83	0	-0.70198
904	he_33220	3495.94	72.4413	1462.8	71.0852	0	-1.25695
924	he_33220	2887.02	82.8638	1414.36	89.829	0	-1.02943
914	he_33220	3124.21	126.493	1456.11	84.0388	0	-1.10138
3732	he_3332	5480.54	155.174	14632.1	303.69	0	1.41674
3742	he_3332	4809.05	123.458	13266.8	365.507	0	1.464
3722	he_3332	6356.99	129.361	15937.4	442.827	0	1.326
3412	he_33592	6277.29	136.072	35142.7	321.956	0	2.48501
3432	he_33592	4719.6	111.174	34008.9	592.975	0	2.84918
3422	he_33592	5282.83	84.4187	34987.1	771.862	0	2.72744
1844	he_33594	858.232	53.1913	8416.7	109.947	0	3.29381
1854	he_33594	841.11	49.7609	8058.66	174.425	0	3.26017
1834	he_33594	1102.17	66.0048	8496.08	271.726	0	2.94645
2992	he_33647	11525.3	166.149	1031.54	58.1555	0	-3.48194
3002	he_33647	11116.5	180.345	899.44	68.0357	0	-3.62753
2982	he_33647	13968.1	258.388	1047.53	86.1417	0	-3.73706
3013	he_33649	6666.01	113.037	298.084	31.1049	0	-4.48303
3033	he_33649	5815.81	130.776	282.931	42.1632	0	-4.36146
3023	he_33649	5902.48	139.031	342.515	36.1125	0	-4.10708
3075	he_34254	2872.24	122.876	1449.94	149.526	2.24887e-12	-0.98618
3095	he_34254	2268.2	67.3798	1330.62	129.561	1.49523e-09	-0.769447
3085	he_34254	2451.01	94.181	1644.76	101.774	4.85404e-08	-0.5755
3250	he_35178	7562.16	121.615	272.701	30.4652	0	-4.79341
3240	he_35178	7719.62	135.569	341.815	44.3102	0	-4.49724
3230	he_35178	9011.59	271.415	228.209	34.0324	0	-5.30335
320	he_35232	1081.49	60.8017	570.835	49.5979	5.03137e-09	-0.921871
340	he_35232	1027.12	43.7595	634.119	54.4334	6.00047e-07	-0.695786
330	he_35232	992.611	69.8051	617.444	66.5192	0.000379363	-0.684921
3271	he_35269	17.5445	8.35366	773.441	62.1339	0	5.4622
3281	he_35269	13.0366	12.7764	799.691	68.3655	0	5.93881
3261	he_35269	33.1689	13.2482	720.154	106.767	3.05227e-09	4.4404
2892	he_35559	2139.05	71.3812	412.327	48.9644	0	-2.37511
2902	he_35559	1802.94	73.7757	347.314	36.1613	0	-2.37604
2912	he_35559	1884.34	72.413	391.078	49.0132	0	-2.26853
263	he_35606	19991.8	224.532	4600.03	134.017	0	-2.11969
253	he_35606	22150.5	253.237	4264.25	175.312	0	-2.37698
273	he_35606	19261.9	400.993	4126	81.7735	0	-2.22294
3292	he_35611	1749.26	113.502	135.446	26.3061	0	-3.69095
3312	he_35611	1837.19	144.241	199.749	35.411	0	-3.20125
3302	he_35611	1635.12	128.183	217.934	21.8181	0	-2.90743
3848	he_35693	1329.75	78.086	1013.43	76.573	0.0077308	-0.391911
3343	he_35750	8269.22	141.685	3466.22	129.54	0	-1.25439
3323	he_35750	10260.7	253.725	3299.29	142.877	0	-1.63691
3333	he_35750	8632	119.975	3541.29	179.481	0	-1.28542
2869	he_360	1.35564	6.55178	128.905	32.7033	0.00224559	6.57119
2879	he_360	2.89311	6.86794	93.744	25.1209	0.00834435	5.01804
1555	he_36376	1105.16	34.9886	14860.3	177.626	0	3.74914
1565	he_36376	899.485	48.0554	16159.2	246.192	0	4.16711
1575	he_36376	941.031	39.1418	14154.8	314.862	0	3.91091
3899	he_36377	180.375	15.624	666.425	56.2287	3.50608e-13	1.88545
3879	he_36377	262.501	21.006	771.608	58.5736	5.90195e-13	1.55554
3889	he_36377	207.168	22.5975	704.83	76.5027	1.63105e-08	1.76648
1699	he_36383	354.364	30.046	515.217	42.7933	0.00786214	0.539947
2900	he_365	125.793	23.2875	3054.44	109.241	0	4.60178
2890	he_365	148.539	18.6495	3259.24	194.188	0	4.45562
2910	he_365	105.072	13.6559	2927.02	223.949	0	4.79998
1042	he_36506	124.486	15.6613	440.21	38.4259	2.67518e-10	1.82221
1052	he_36506	168.43	22.656	529.879	54.4221	8.04633e-08	1.65352
1032	he_36506	209.334	25.9699	506.219	52.8678	1.01596e-05	1.27395
3354	he_36542	131.022	22.1298	34.5668	10.2851	0.00369589	-1.92235
3385	he_36543	197.912	17.2382	51.5164	15.0388	3.65891e-06	-1.94176
3395	he_36543	179.361	21.5526	72.5864	18.1547	0.00393	-1.30509
3426	he_36553	45.9289	10.5044	251.09	27.6846	7.331e-08	2.45073
3436	he_36553	35.189	7.7935	251.484	31.9994	1.774e-07	2.83727
3416	he_36553	64.1016	11.6702	235.417	27.9062	9.68065e-06	1.87678
3457	he_36556	437.313	23.2613	174.255	22.5756	1.63379e-10	-1.32747
3447	he_36556	518.094	44.7004	152.486	20.7918	3.08546e-10	-1.76454
3467	he_36556	419.819	71.0837	147.657	29.4367	0.00155869	-1.50752
1311	he_36597	1544.13	69.1081	101.249	18.0889	0	-3.93082
1321	he_36597	1224.54	55.8754	80.8872	24.2909	0	-3.92018
1331	he_36597	1372.91	112.077	90.7061	17.6225	0	-3.9199
3519	he_36616	14774.9	163.422	6817.28	172.534	0	-1.11588
3529	he_36616	14027.4	195.598	7006.43	143.043	0	-1.00149
3509	he_36616	17406.2	225.217	7378.49	278.264	0	-1.2382
3550	he_36649	6.83046	4.1805	70.8839	15.7068	0.00954744	3.3754
3571	he_36788	1414.53	40.5214	989.837	80.2403	1.75863e-05	-0.515057
3581	he_36788	1231.61	48.8971	856.82	66.7277	4.3995e-05	-0.523481
3591	he_36788	1205.83	57.7997	850.59	85.7993	0.00161978	-0.503495
3602	he_36832	11918.5	226.828	6871.47	256.805	0	-0.794507
3622	he_36832	9586.43	224.616	6038.5	169.214	0	-0.666804
3612	he_36832	9981.46	202.27	6345.33	216.789	0	-0.653555
3674	he_36910	19200.5	149.693	7343.05	119.23	0	-1.38669
3684	he_36910	18823.4	297.156	7075.59	182.565	0	-1.41161
3664	he_36910	23052.7	373.982	8068.16	387.267	0	-1.51463
2644	he_3702	238.923	15.2899	68.9155	19.7011	4.46789e-07	-1.79365
2664	he_3702	196.519	28.7311	79.6378	19.0829	0.00707051	-1.30315
3620	he_37052	116.113	14.1	270.14	19.2495	1.95098e-06	1.21818
3610	he_37052	103.178	17.4145	266.09	30.4971	0.000182985	1.36678
3600	he_37052	164.191	21.1771	272.65	24.2497	0.00749076	0.731671
3705	he_37317	12636.6	186.548	6415.35	138.876	0	-0.978005
3715	he_37317	12338.3	275.558	5666.1	155.838	0	-1.12271
3695	he_37317	14962.9	330.146	6841.07	247.783	0	-1.1291
3798	he_37851	10027.1	189.642	739.32	67.4169	0	-3.76156
3788	he_37851	11815.3	262.007	703.571	64.1661	0	-4.06982
3808	he_37851	9867.3	217.814	603.499	52.1365	0	-4.03123
3819	he_37854	8929.81	174.814	7128.11	261.045	2.63344e-08	-0.325109
3839	he_37854	7319.15	137.75	6283.88	302.736	0.00255574	-0.22002
3860	he_37889	120.745	13.0692	5477.46	71.7439	0	5.50348
3870	he_37889	116.308	14.5887	5448.5	169.085	0	5.54984
3850	he_37889	157.223	18.0036	6028.36	241.25	0	5.26088
3901	he_37892	41.2509	11.7397	3802.86	142.469	0	6.52652
3881	he_37892	84.715	12.263	3822.11	148.013	0	5.49561
3891	he_37892	61.9447	10.7402	3521.28	144.496	0	5.82898
1238	he_37964	17.2029	3.97493	116.181	19.3998	0.000467207	2.75565
3853	he_37964	32.9958	7.09794	123.85	16.1386	0.000506099	1.90823
3873	he_37964	11.0544	9.0156	131.467	25.8618	0.000777324	3.572
3863	he_37964	8.43227	5.22923	130.539	27.5579	0.000817925	3.95242
1228	he_37964	15.48	6.42229	96.9806	20.2834	0.00609042	2.64729
3912	he_38204	87.4676	17.4934	3171.75	109.529	0	5.18039
3922	he_38204	63.3819	11.2707	3014.59	116.457	0	5.57175
3932	he_38204	35.168	10.6038	3043.58	157.347	0	6.43536
3953	he_38247	6426.96	126.081	1512.97	83.7243	0	-2.08676
3943	he_38247	7437.94	208.079	1424.58	92.4324	0	-2.38436
3963	he_38247	6111.76	175.992	1466.98	114.131	0	-2.05874
3279	he_38407	10566.6	210.308	47017.9	705.859	0	2.15371
3269	he_38407	11162.6	92.797	43108	680.94	0	1.94929
3259	he_38407	14162.3	262.698	52179.2	1326.54	0	1.88142
1772	he_38408	321.571	32.0163	53.0868	12.6368	4.97568e-10	-2.59871
1792	he_38408	228.429	21.3384	61.0351	20.4033	1.23918e-05	-1.90404
1782	he_38408	225.389	34.2908	58.0202	15.9473	0.000335275	-1.95779
2814	he_38409	13095.2	253.308	49260.9	403.897	0	1.91141
2794	he_38409	18260	219.682	53654	715.911	0	1.555
2804	he_38409	14164.1	162.671	57869.7	996.695	0	2.03057
1276	he_38410	388.43	20.7543	177.384	40.6986	0.000109466	-1.13078
1286	he_38410	355.203	32.0983	209.302	20.0531	0.00179534	-0.763056
1296	he_38410	322.76	22.8443	181.511	30.4906	0.00264972	-0.830406
48	he_38575	26215.5	216.756	10968.7	316.262	0	-1.25703
58	he_38575	25247.5	367.42	9960.04	238.17	0	-1.34192
38	he_38575	26311.1	333.663	11245.5	405.137	0	-1.22632
89	he_38577	10016.4	96.6206	5755.53	104.999	0	-0.799347
79	he_38577	10303.7	153.137	6092.99	133.977	0	-0.757943
69	he_38577	10646.6	199.913	6281.17	221.283	0	-0.761294
110	he_38583	9540.02	106.828	2426.58	78.7346	0	-1.97507
120	he_38583	9284.7	144.734	2220.59	88.9897	0	-2.06391
100	he_38583	9796.8	116.158	2497.4	149.028	0	-1.97188
1063	he_38587	12447	190.012	3232.71	125.93	0	-1.94498
1083	he_38587	11252.6	177.338	3155.47	108.698	0	-1.83433
1073	he_38587	10357.8	205.93	2900.09	115.311	0	-1.83655
131	he_38779	829.874	38.144	236.911	21.0231	0	-1.80855
141	he_38779	809.306	43.7886	269.326	33.9931	0	-1.58733
151	he_38779	886.003	120.935	320.711	100.877	0.000709641	-1.46604
162	he_38881	78.1249	11.7966	8.43081	6.34376	0.00164549	-3.21204
213	he_38904	11812.1	192.63	9885.92	151.057	3.36398e-14	-0.256819
203	he_38904	12347.8	183.546	10711.4	327.106	2.16148e-05	-0.205113
193	he_38904	13039	145.946	11501.8	343.476	6.10442e-05	-0.180977
306	he_39302	15819	182.108	4408.02	87.3885	0	-1.84345
286	he_39302	17268.8	184.174	5002.08	168.609	0	-1.78756
296	he_39302	16444.6	267.086	4538.09	109.912	0	-1.85746
337	he_39456	688.497	34.8854	404.234	41.9136	7.34142e-06	-0.768261
327	he_39456	712.841	67.6354	423.737	47.2578	0.00160522	-0.750412
317	he_39456	716.057	55.8887	440.822	71.9219	0.00608688	-0.699877
2812	he_39499	2.24842	4.55217	74.4414	16.1723	0.00428311	5.04912
368	he_39736	5428.71	106.791	311.707	36.4769	0	-4.12235
348	he_39736	5697.81	184.149	296.337	28.085	0	-4.2651
358	he_39736	5525.62	174.845	350.532	42.5016	0	-3.97852
389	he_39883	18824	165.316	6266.59	139.903	0	-1.58682
399	he_39883	18105.4	199.799	6151.71	196.679	0	-1.55736
379	he_39883	19564.2	342.819	6803.42	271.018	0	-1.52389
430	he_40110	6671.58	103.447	2611.88	151.538	0	-1.35294
420	he_40110	6760.77	185.746	2672.73	98.4898	0	-1.33887
410	he_40110	6874.2	281.745	2888.4	115.801	0	-1.25092
441	he_40138	32514.4	233.35	35687.2	518.119	3.44179e-08	0.134328
492	he_40142	9311.84	130.458	4116.26	197.12	0	-1.17773
482	he_40142	9522.93	172.14	4104.77	182.8	0	-1.21411
472	he_40142	10292	167.23	4597.8	242.351	0	-1.16251
513	he_40162	3734.84	77.4951	1959.87	115.798	0	-0.93029
523	he_40162	3650.43	145.094	1819.06	89.9707	0	-1.00487
503	he_40162	3975.48	126.595	2093.9	197.995	1.29896e-14	-0.924936
544	he_40174	1850.49	49.1043	1239.53	71.8143	1.86626e-10	-0.578114
554	he_40174	1841.03	83.9092	1120.45	91.5161	6.32681e-08	-0.716435
534	he_40174	1907.69	106.725	1218.88	107.379	1.80928e-05	-0.646272
585	he_40343	28734.3	224.493	17250.3	279.051	0	-0.736154
575	he_40343	30316.2	291.356	18188	280.744	0	-0.737106
565	he_40343	32093.7	472.129	20480.9	524.867	0	-0.648011
3448	he_4037	7727.92	265.006	5926.18	201.262	1.43804e-07	-0.382978
3458	he_4037	6816.89	89.6997	5886.11	154.137	7.00774e-07	-0.2118
616	he_40709	3190.07	130.796	572.099	69.5082	0	-2.47925
596	he_40709	3303.91	186.846	565.645	70.4215	0	-2.54621
606	he_40709	2942.06	256.521	536.556	89.302	0	-2.45503
637	he_40719	29203.8	288.804	17186	376.375	0	-0.76492
647	he_40719	27871.8	436.46	16509.4	281.844	0	-0.755523
627	he_40719	30634	388.228	19348.6	502.988	0	-0.662909
678	he_40953	6221.48	137.266	3324.66	90.4813	0	-0.904052
668	he_40953	6597.39	125.673	3604.59	133.513	0	-0.872059
658	he_40953	6876.41	163.744	3700.39	230.505	0	-0.89398
699	he_40976	37.7511	11.5329	209.688	27.0346	5.63059e-06	2.47365
709	he_40976	38.1883	18.1378	206.6	30.0331	0.000108787	2.43564
689	he_40976	26.1147	6.89861	206.643	50.1266	0.00217351	2.9842
366	he_41210	2227.92	136.168	92.2688	20.8429	0	-4.59371
356	he_41210	2138.54	132.885	112.249	23.6342	0	-4.25186
346	he_41210	1620.28	118.13	78.5506	28.7071	0	-4.36648
740	he_41259	12100.1	127.282	760.196	48.6727	0	-3.99251
720	he_41259	13310.6	217.944	823.393	71.2181	0	-4.01485
730	he_41259	12640.2	212.423	804.853	51.7923	0	-3.97315
761	he_41264	37.7396	5.37123	952.666	53.8028	0	4.65782
771	he_41264	30.1553	10.3181	894.701	70.3903	0	4.89092
751	he_41264	40.1059	13.3681	1052.43	90.4746	0	4.71377
782	he_41333	5112.52	84.3728	296.406	41.4349	0	-4.10839
792	he_41333	4857.88	148.975	355.077	45.5768	0	-3.77412
802	he_41333	4706.69	144.948	279.083	51.2591	0	-4.07594
844	he_41514	120.835	18.5101	10.3775	8.03836	0.000134971	-3.5415
854	he_41514	105.93	12.6781	25.886	7.42548	0.000637001	-2.03287
864	he_41514	104.281	16.5825	13.3785	9.16303	0.00103939	-2.96248
875	he_41519	132.908	13.5762	17.4911	12.7809	2.50008e-05	-2.92573
885	he_41519	112.457	10.4577	27.1067	11.5916	0.000458166	-2.05266
895	he_41519	100.313	14.6797	16.1843	7.81218	0.000920114	-2.63184
3453	he_41735	2647.72	52.1844	8300.67	243.504	0	1.64848
3443	he_41735	3115.21	128.633	7797.43	252.144	0	1.32367
3463	he_41735	2374.19	109.799	8017.15	462.704	0	1.75565
85	he_4201	347.422	28.9933	2498.1	80.624	0	2.84607
65	he_4201	410.809	35.5601	2934.04	111.737	0	2.83635
75	he_4201	341.614	36.3967	2618.35	129.063	0	2.93822
2680	he_42176	4.08583	4.8636	103.926	24.5903	0.00287738	4.66879
2690	he_42176	5.88003	6.5884	86.8142	18.4468	0.00390361	3.88404
947	he_42311	37.8375	6.3808	395.64	28.806	0	3.3863
957	he_42311	26.8487	8.84397	424.625	40.5559	1.88738e-15	3.98326
937	he_42311	48.3675	6.22166	433.292	79.2287	1.15175e-05	3.16323
516	he_42318	28.6915	7.78949	933.21	54.727	0	5.02351
506	he_42318	49.2633	11.8677	981.204	72.7724	0	4.31597
526	he_42318	43.8763	13.0419	1040.78	81.1504	0	4.56808
3489	he_4234	3467.14	88.5091	968.526	53.9325	0	-1.83988
3499	he_4234	3390.96	90.4559	983.947	51.434	0	-1.78504
3479	he_4234	3830.95	134.469	888.717	65.0152	0	-2.10791
2502	he_42549	5462.69	105.093	500.578	27.2563	0	-3.44795
2482	he_42549	7570.56	146.491	572.591	61.6188	0	-3.72482
2492	he_42549	6243.29	128.977	556.217	57.2062	0	-3.48859
3445	he_42966	5115.21	141.457	15575.3	253.864	0	1.6064
3455	he_42966	4037.93	131.279	13259.8	279.6	0	1.71537
3465	he_42966	3809.21	74.9832	13881.2	358.135	0	1.86556
3546	he_43060	6214.73	117.174	18849.5	281.287	0	1.60077
3536	he_43060	7373.87	136.432	18644.4	401.698	0	1.33825
3556	he_43060	5717.44	123.89	16967.2	568.822	0	1.56931
988	he_43348	3934.13	112.426	1688.48	94.1596	0	-1.22032
978	he_43348	4083.03	113.03	1864.69	92.185	0	-1.1307
968	he_43348	4503.8	121.185	1894.7	127.708	0	-1.24917
1009	he_43686	10308.5	117.017	3692.29	95.932	0	-1.48125
1019	he_43686	9954.16	125.114	3532.62	143.405	0	-1.49456
999	he_43686	11113.2	182.611	3912.63	181.506	0	-1.50607
1040	he_43853	6985.62	132.393	4665.54	114.986	0	-0.582345
1050	he_43853	6662.42	162.115	4568.72	153.411	0	-0.544256
1030	he_43853	7620.41	182.155	5105.85	208.882	0	-0.577718
1071	he_44379	2293.97	291.42	109.962	26.4872	4.73843e-13	-4.38277
1081	he_44379	2176.37	557.5	86.9938	38.415	0.000247557	-4.64487
1061	he_44379	2281.79	605.902	85.0455	35.0474	0.000383002	-4.74579
2551	he_444	15401.9	165.509	7130.61	219.246	0	-1.11101
2561	he_444	12558.2	224.91	6789.25	200.09	0	-0.887305
2571	he_444	12818.6	305.534	6983.61	160.486	0	-0.87619
3122	he_44807	1653.26	54.3125	522.485	50.2926	0	-1.66186
3112	he_44807	1796.26	60.2049	528.453	65.1448	0	-1.76515
3102	he_44807	2263.9	120.818	573.135	74.7759	0	-1.98186
1528	he_4491	194.057	24.2509	58.8688	11.8169	0.00015693	-1.72091
1548	he_4491	178.797	29.3701	53.4888	13.0933	0.00224827	-1.74101
10	he_45012	24044.1	220.063	7775.78	251.781	0	-1.62862
30	he_45012	24089.7	254.249	8621.88	190.428	0	-1.48234
20	he_45012	22178.5	225.917	7686.92	193.015	0	-1.52868
1174	he_45766	12097.8	171.657	4656.18	166.109	0	-1.37752
1164	he_45766	12517.6	231.623	4760.14	175.371	0	-1.39489
1154	he_45766	13868.6	254.257	5277.58	320.453	0	-1.39388
1226	he_46034	10119.1	138.067	396.227	48.694	0	-4.67462
1236	he_46034	9911.94	161.955	388.366	49.1069	0	-4.67368
1216	he_46034	11128.7	229.918	411.544	50.396	0	-4.7571
3520	he_4609	2002.07	52.3128	379.275	33.4297	0	-2.40018
3510	he_4609	2193.42	65.6309	384.472	36.4653	0	-2.51223
3530	he_4609	1906.33	57.3344	352.114	37.4121	0	-2.43668
1257	he_46242	29221.9	272.529	5009.79	105.246	0	-2.54423
1267	he_46242	28319.3	285.924	4925.51	180.348	0	-2.52344
1247	he_46242	33001.5	583.484	5438.18	162.678	0	-2.60134
3551	he_4625	23.9503	6.82043	223.626	17.3109	1.9873e-13	3.22297
3541	he_4625	40.1583	7.22988	192.144	27.7813	4.34354e-05	2.25842
3561	he_4625	21.8426	10.1418	210.142	37.0286	5.76878e-05	3.26615
1298	he_46408	17020.8	182.93	10510	120.686	0	-0.695529
1288	he_46408	17422.1	152.861	11056.6	247.217	0	-0.656009
1278	he_46408	19915.4	236.256	11838.4	317.262	0	-0.750406
1360	he_46744	63.8468	13.4228	4479.8	135.183	0	6.13267
1350	he_46744	66.2796	15.3294	4509.09	138.963	0	6.08813
1340	he_46744	99.0242	11.4464	5253.72	214.728	0	5.72941
1391	he_46823	19350.2	290.324	9037.42	215.669	0	-1.09837
1381	he_46823	20166.8	311.288	9640.33	313.757	0	-1.06483
1371	he_46823	22555.1	490.788	10213.3	205.647	0	-1.14301
3298	he_46887	543.504	29.4119	1121.96	63.4186	1.54654e-13	1.04567
3308	he_46887	488.826	32.953	1247.98	111.289	1.02433e-09	1.3522
3288	he_46887	654.511	41.8916	1262.39	137.97	6.46493e-05	0.947671
3920	he_47036	3038.64	103.382	18431.6	232.381	0	2.60069
3930	he_47036	2860.4	74.7007	19449.7	475.06	0	2.76546
3910	he_47036	3588.99	79.9199	20636.9	530.009	0	2.52358
1422	he_47085	14287.4	150.467	7235.15	182.743	0	-0.981653
1412	he_47085	14879.1	148.257	7885.58	255.172	0	-0.915997
1402	he_47085	16635.3	290.697	8007.77	276.342	0	-1.05478
1443	he_47213	12055.3	132.099	4945.26	154.215	0	-1.28555
1433	he_47213	13680.3	206.825	5033.23	287.617	0	-1.44255
1453	he_47213	11721	284.04	4545.21	171.094	0	-1.36668
3582	he_4723	8071.85	127.427	5312.32	99.2812	0	-0.603559
3572	he_4723	8978.42	102.414	5436.36	196.856	0	-0.72382
3592	he_4723	7713.38	162.536	5381.94	194.374	0	-0.519236
1464	he_47479	1399.94	74.0728	347.65	37.823	0	-2.00966
1484	he_47479	1317.05	76.0001	339.272	39.548	0	-1.95679
1474	he_47479	1307.82	66.9695	378.692	46.1401	0	-1.78806
1505	he_47496	6513.55	127.291	1094.45	63.3159	0	-2.57323
1515	he_47496	6346.42	136.609	1014.08	74.0847	0	-2.64576
1495	he_47496	7320.43	174.933	1085.87	79.2454	0	-2.75307
1546	he_47498	4325.07	102.06	1967.71	123.371	0	-1.1362
1536	he_47498	4490.08	128.438	2198.2	100.866	0	-1.03042
1526	he_47498	5014.85	202.952	2098.03	101.025	0	-1.25717
1608	he_47505	5260.29	104.724	3043.09	123.514	0	-0.789606
1588	he_47505	6259.34	163.855	3531.73	182.066	0	-0.825634
1598	he_47505	5465.02	119.529	3450.43	164.984	0	-0.663451
1660	he_47514	4823.06	97.6157	1331.11	79.608	0	-1.85732
1670	he_47514	4727.24	110.542	1233.97	77.7434	0	-1.93769
1650	he_47514	5434.39	151.554	1384.51	73.9586	0	-1.97274
2854	he_47515	1742.73	103.327	68.579	16.533	0	-4.66744
2864	he_47515	1237.55	72.5788	42.6607	14.3834	0	-4.85844
2874	he_47515	1385.46	112.41	59.8606	15.8763	0	-4.53262
1681	he_47519	3457.5	111.857	2381.79	142.968	1.70198e-08	-0.537687
1701	he_47519	2995.39	77.2051	2409.79	147.249	0.000864848	-0.313838
1743	he_47544	10396.6	137.637	3468.17	158.658	0	-1.58387
1763	he_47544	8872.09	205.445	3272.75	184.954	0	-1.43877
1753	he_47544	9116.37	179.598	3583.8	209.301	0	-1.34697
1794	he_47546	7916.08	113.892	2594.17	126.918	0	-1.60951
1784	he_47546	8067.12	169.435	2859	127.694	0	-1.49654
1774	he_47546	9152.11	223.335	2721.01	141.709	0	-1.74996
1815	he_47550	7585.34	129.163	3574.15	99.5937	0	-1.08562
1805	he_47550	8625.59	209.933	3370.45	128.856	0	-1.35568
1825	he_47550	7393.42	173.801	3311.57	93.5557	0	-1.15873
1856	he_47551	805.088	31.3384	239.723	37.7392	0	-1.74778
1836	he_47551	966.006	56.9297	275	56.6516	8.99281e-15	-1.8126
1846	he_47551	850.475	61.8847	287.664	35.4931	2.20612e-12	-1.56388
1877	he_47552	8051.54	135.563	3809.43	104.946	0	-1.07969
1867	he_47552	9173.65	164.468	3651.86	163.054	0	-1.32887
1887	he_47552	7931.05	125.27	3564.77	163.799	0	-1.1537
1918	he_47554	6896.58	117.577	2968.29	111.285	0	-1.21625
1898	he_47554	7924.41	163.774	2977.9	166.346	0	-1.41201
1908	he_47554	7006.24	105.323	3210.76	142.701	0	-1.12572
1939	he_47558	9453.29	138.3	3721.94	83.986	0	-1.34476
1949	he_47558	9496.82	142.303	3597.26	107.367	0	-1.40055
1929	he_47558	11111.4	183.322	3657.46	198.72	0	-1.60313
1970	he_47874	13322.9	179.175	5040.18	99.0644	0	-1.40236
1980	he_47874	12977.4	183.163	4691.12	158.197	0	-1.468
1960	he_47874	15341.6	255.095	4789.62	266.606	0	-1.67946
3915	he_48015	1859.88	38.7797	372.522	35.7248	0	-2.31981
3935	he_48015	1728.05	71.066	379.599	37.3357	0	-2.1866
3925	he_48015	1584.93	95.0198	354.771	41.2818	0	-2.15946
1823	he_48076	1678.4	54.1458	12200.3	258.982	0	2.86176
1803	he_48076	2108.45	51.8629	13216.1	292.67	0	2.64804
1813	he_48076	1710.79	66.2199	13442.7	345.492	0	2.97408
1741	he_48830	90.6173	11.5166	370.11	29.0636	2.15361e-12	2.0301
1761	he_48830	38.4762	10.9893	349.467	47.6197	5.76125e-08	3.18312
1751	he_48830	33.0519	11.2549	370.22	60.7331	1.5317e-06	3.48558
3603	he_4902	322.317	30.7987	34.3354	13.7588	1.18996e-11	-3.23071
3613	he_4902	317.283	32.0489	38.8276	8.73412	3.1937e-11	-3.03061
3623	he_4902	228.009	27.1732	18.0286	9.58691	2.25734e-08	-3.66073
302	he_4926	34.1917	9.31839	226.421	27.5667	3.17421e-07	2.72729
292	he_4926	34.1942	9.44345	212.359	31.1084	1.37155e-05	2.63468
282	he_4926	58.3834	11.7461	232.058	31.8504	4.19114e-05	1.99085
2063	he_49538	5577.58	66.295	2424.56	46.1581	0	-1.20192
2053	he_49538	6263.09	94.7886	2355.16	98.8269	0	-1.41105
2073	he_49538	5556.15	97.8453	2396.07	74.3331	0	-1.21341
2358	he_49591	66.0797	9.73171	13.2761	5.73773	0.00846216	-2.31537
2907	he_49593	35.2096	6.78101	155.899	24.9073	0.000428914	2.14657
2897	he_49593	43.5887	10.6241	191.304	42.8448	0.00485377	2.13384
1193	he_49594	1384.02	43.7374	7663.37	184.904	0	2.46912
1183	he_49594	1526.58	67.8723	6991.36	186.493	0	2.19527
1203	he_49594	1334.8	65.2006	6662.16	235.197	0	2.31936
1317	he_49595	175.581	17.1826	634.437	58.4644	3.75269e-11	1.85334
1327	he_49595	161.921	21.8301	502.014	39.7639	2.67261e-10	1.63244
1307	he_49595	234.561	23.0197	548.928	60.9593	1.88791e-05	1.22666
3496	he_49596	1380.76	63.0858	9123.09	200.371	0	2.72406
3476	he_49596	1786.04	66.6858	10180.4	236.838	0	2.51096
3486	he_49596	1357.56	82.7181	8595.63	389.482	0	2.66259
3634	he_4967	10881.2	134.531	489.681	61.0598	0	-4.47385
3654	he_4967	9460.96	166.281	469.151	33.2108	0	-4.33386
3644	he_4967	9704.48	202.967	529.373	47.5074	0	-4.1963
3155	he_49808	4361.72	101.675	10647	266.459	0	1.28748
3145	he_49808	4505.28	86.4858	10235.3	262.994	0	1.18387
3135	he_49808	5727.32	139.772	11892.2	477.46	0	1.05408
1720	he_49811	46.5657	15.8839	808.081	78.2459	0	4.11716
1730	he_49811	58.8653	10.7011	746.007	74.1612	2.22045e-16	3.6637
1710	he_49811	95.8349	15.1181	766.742	85.2654	1.62892e-12	3.00012
583	he_49813	2811.4	118.204	6344.81	202.42	0	1.17428
573	he_49813	3077.85	122.858	7204.12	315.148	0	1.2269
563	he_49813	3327.49	92.2626	6564.72	247.91	0	0.9803
1420	he_49836	5978.82	129.218	34530	346.607	0	2.52992
1410	he_49836	6442.54	81.0135	39254	429.191	0	2.60714
1400	he_49836	7637.26	185.14	35576.7	343.082	0	2.21981
191	he_49840	487.41	34.6932	108.513	19.8176	7.10543e-15	-2.16727
211	he_49840	447.468	34.9838	120.07	16.9388	6.1533e-12	-1.89791
201	he_49840	481.669	42.5292	123.706	17.2854	5.87934e-11	-1.96113
2084	he_50065	4476.41	89.7524	805.908	61.1579	0	-2.47366
2104	he_50065	3849.75	98.3107	829.46	52.1363	0	-2.21452
2094	he_50065	3916.89	117.819	912.019	72.1105	0	-2.10257
2430	he_50323	3264.5	126.291	9232.77	296.244	0	1.4999
2440	he_50323	2952.05	141.313	8830.97	431.565	0	1.58086
2420	he_50323	4047.11	153.527	9731.91	424.17	0	1.26583
2125	he_50521	10195.6	134.37	674.221	36.6276	0	-3.91858
2135	he_50521	10381.3	136.236	691.422	43.9486	0	-3.90828
2115	he_50521	12016.5	283.511	624.415	42.0094	0	-4.26637
3706	he_5069	136.273	24.0366	1875.73	92.3926	0	3.78288
3716	he_5069	132.431	19.6619	1738.48	103.732	0	3.71452
3696	he_5069	145.108	28.9088	1886.57	180.911	0	3.70057
3267	he_50707	8432.25	129.353	4222.43	167.365	0	-0.997843
3257	he_50707	10365.1	203.843	4488.99	262.176	0	-1.20727
3277	he_50707	7740.55	192.296	4639.93	199.08	0	-0.738331
3822	he_50723	6443.78	73.7239	61.7323	13.6942	0	-6.70574
3832	he_50723	5579.54	111.565	62.5099	12.8215	0	-6.47992
3842	he_50723	5994.12	131.767	69.6187	16.0252	0	-6.42793
2156	he_50815	10739.7	128.887	781.245	40.0127	0	-3.78104
2146	he_50815	12610.1	224.375	706.425	78.095	0	-4.1579
2166	he_50815	10693.6	209.751	776.276	60.862	0	-3.78404
3737	he_5126	22065.2	224.206	10076.4	229.418	0	-1.13079
3747	he_5126	21949.4	331.111	9375.38	371.625	0	-1.22723
3727	he_5126	26061.5	527.541	10580.6	417.618	0	-1.3005
821	he_51342	5721.09	150.854	21840.2	498.535	0	1.93263
831	he_51342	5404.07	135.585	19689.2	475.979	0	1.86529
811	he_51342	6260.22	177.972	20003	608.963	0	1.67593
3166	he_51344	1870.24	80.2165	10965.1	272.984	0	2.55163
3176	he_51344	1524.25	64.337	9906.36	295.645	0	2.70026
3186	he_51344	1471.53	81.3074	9554.15	290.757	0	2.69882
2239	he_51356	1250.01	78.1406	792.086	60.877	2.28261e-05	-0.658209
3778	he_5138	1293.3	42.5846	247.894	36.2394	0	-2.38326
3758	he_5138	1405.34	61.6501	239.109	29.2499	0	-2.55518
3768	he_5138	1213.39	51.6984	245.189	25.2207	0	-2.30708
2628	he_51417	459.062	27.7883	1499.38	47.6912	0	1.70761
2608	he_51417	640.086	31.4843	1630.8	71.1174	0	1.34924
2618	he_51417	492.353	27.6388	1369.91	100.486	6.43929e-15	1.47632
1162	he_51418	2406.34	74.7155	5307.73	175.473	0	1.14125
1172	he_51418	2373.99	84.7453	4820.56	146.482	0	1.02189
1152	he_51418	2786.78	92.5005	4910.06	206.042	0	0.81714
2270	he_51788	32.2484	10.0401	1305.19	74.9548	0	5.33889
2290	he_51788	10.1371	13.7948	1446.1	86.8461	0	7.15638
2280	he_51788	20.992	12.3035	1352.66	105.772	0	6.00982
2311	he_51830	9.84121	5.60304	299.158	25.6943	1.11022e-16	4.92593
2321	he_51830	3.36393	4.83723	310.663	31.6164	3.34177e-14	6.52906
2301	he_51830	25.319	10.5865	250.935	38.9789	3.83582e-06	3.30902
2352	he_51888	9637.85	122.718	682.514	70.2814	0	-3.81978
2332	he_51888	11502.8	169.784	593.253	97.093	0	-4.27719
2342	he_51888	9886.37	158.416	737.081	51.898	0	-3.74555
2383	he_51961	9874.93	194.823	12074	240.063	4.00435e-12	0.290061
2373	he_51961	10251.7	150.674	11254.5	225.165	0.000313073	0.134632
309	he_52010	148.694	21.32	374.258	29.3762	4.69568e-07	1.33169
299	he_52010	136.844	19.874	322.981	31.4032	4.45864e-05	1.23892
289	he_52010	196.659	19.6539	347.042	38.1353	0.00332741	0.819413
1424	he_52022	773.769	60.9615	386.951	27.0928	3.10054e-07	-0.999752
1414	he_52022	699.282	70.8679	348.999	40.7868	0.000114396	-1.00265
1404	he_52022	859.882	75.4405	453.635	68.6145	0.000256429	-0.922607
495	he_52106	3094.4	97.5765	1619	84.6299	0	-0.934557
475	he_52106	3123.81	82.2319	1527.96	115.966	0	-1.0317
485	he_52106	2832.02	98.1559	1419.42	94.0286	0	-0.996528
2404	he_52245	10851	192.636	878.874	66.0339	0	-3.62602
2394	he_52245	12603	239.787	787.103	69.4209	0	-4.00107
2414	he_52245	10612.7	230.513	872.08	50.3668	0	-3.60519
2323	he_5226	12894.2	239.39	35624.3	594.171	0	1.46614
2313	he_5226	12209.9	179.456	34721.3	672.5	0	1.50776
2303	he_5226	15123.2	225.584	37007.6	706.424	0	1.29106
742	he_52487	69.4097	7.62282	13.9019	5.84046	0.00246407	-2.31985
722	he_52487	80.0313	12.0069	16.9341	5.81669	0.00430385	-2.24064
2466	he_52701	1654.15	59.6065	946.034	33.3244	0	-0.806123
2476	he_52701	1614.76	43.3917	1027.86	54.8939	9.34808e-14	-0.651679
2456	he_52701	1961.13	91.2126	945.256	97.3065	9.55014e-13	-1.05291
2518	he_52733	165.353	19.371	67.1026	18.1807	0.00552836	-1.30111
2662	he_52854	8569.07	99.4931	3884.94	108.856	0	-1.14125
2652	he_52854	8815.42	134.316	3613.57	161.096	0	-1.2866
2642	he_52854	10371	219.497	3915.92	157.217	0	-1.40513
3060	he_52875	139.952	18.3251	739.351	51.0271	0	2.40133
3040	he_52875	208.586	18.6918	650.843	74.6559	2.16417e-07	1.64167
3050	he_52875	141.848	27.9155	625.787	80.8425	2.50641e-07	2.14132
2714	he_52910	23181.3	205.426	12111.3	185.85	0	-0.936609
2724	he_52910	22021.9	265.628	12312.1	239.138	0	-0.838862
2704	he_52910	26963.8	674.936	13413.3	329.689	0	-1.00736
2745	he_52927	15934.4	174.592	5939.88	149.505	0	-1.42364
2755	he_52927	15087.7	199.716	5991.3	261.205	0	-1.33243
2735	he_52927	18388.8	282.891	6607.69	378.197	0	-1.47661
5	he_53032	10440.8	194.381	36309.9	302.882	0	1.79813
15	he_53032	9892.19	158.79	40344	412.405	0	2.02799
25	he_53032	9494.32	170.203	35742.4	479.33	0	1.9125
1875	he_53033	220.176	29.8115	421.525	26.3264	2.94646e-05	0.936963
1885	he_53033	214.975	24.8483	410.827	39.8286	0.000397592	0.93436
2905	he_53034	6948.58	162.284	31814.9	405.755	0	2.19491
2895	he_53034	7528.67	172.11	34621.5	683.024	0	2.2012
2885	he_53034	9734.59	148.369	38203.3	743.874	0	1.9725
3001	he_531	624.691	36.2345	7622.06	154.189	0	3.60896
2991	he_531	682.676	52.8294	8745.52	216.014	0	3.67927
2981	he_531	828.351	34.09	8234.08	263.354	0	3.31329
2998	he_53109	1721.04	57.1828	3770.48	126.308	0	1.13147
2978	he_53109	2438.62	68.2281	4699	150.515	0	0.946288
2988	he_53109	1845.95	67.5049	4016.45	254.884	1.33227e-15	1.12156
1482	he_53133	8626.63	125.737	20617.5	397.488	0	1.257
1472	he_53133	9090.57	201.234	23052.5	536.189	0	1.34248
1462	he_53133	10878.9	195.063	20765.3	392.904	0	0.932645
2776	he_53189	24636.4	282.298	20900.1	186.718	0	-0.237282
2766	he_53189	29009.1	512.782	23798.1	663.141	8.47111e-10	-0.285663
2786	he_53189	23563.2	366.064	21106	462.146	4.30634e-05	-0.15888
2389	he_53228	137.001	19.8787	37.3823	11.8982	0.00183308	-1.87376
164	he_53286	283.403	21.4461	563.749	38.5889	9.84968e-08	0.992197
184	he_53286	269.236	22.0275	597.454	58.2227	3.34942e-06	1.14996
174	he_53286	229.097	17.6617	521.551	59.1616	3.00137e-05	1.18685
3806	he_53287	2375.84	84.0989	6239.47	191.572	0	1.39299
3796	he_53287	2559.79	71.2406	6885.67	233.919	0	1.42757
3786	he_53287	2949.71	71.8039	6658.12	229.016	0	1.17454
3809	he_5346	15236.2	240.004	8637.64	192.581	0	-0.818793
3799	he_5346	15244.7	269.887	9205.41	210.424	0	-0.727751
3789	he_5346	17876	347.254	9573.48	441.52	0	-0.900905
3114	he_53548	85.6679	18.8366	366.057	42.4239	3.20092e-07	2.09524
3124	he_53548	80.0947	14.7995	305.483	33.2262	5.00814e-07	1.93131
3104	he_53548	145.066	20.9454	371.414	47.8209	0.000185422	1.35632
449	he_53589	1728.23	57.8869	6331.93	187.176	0	1.87335
459	he_53589	1607.54	94.6055	5461.31	227.541	0	1.76439
439	he_53589	1808.3	62.6441	5829.66	279.121	0	1.68878
139	he_53591	232.786	30.712	663.81	55.5241	2.00691e-09	1.51177
149	he_53591	204.626	22.6512	593.716	53.5715	5.12997e-09	1.53678
129	he_53591	272.953	21.8718	620.704	47.5019	1.03148e-08	1.18525
2319	he_5626	49.1723	13.5727	445.108	49.1316	2.72474e-11	3.17824
2299	he_5626	77.0502	9.42471	448.922	50.7864	6.15517e-10	2.5426
2309	he_5626	46.347	15.9141	419.064	55.5946	1.84468e-08	3.17662
3830	he_5651	5223.23	112.125	1509.08	83.9264	0	-1.79127
3840	he_5651	5281.32	138.411	1388.76	52.9867	0	-1.9271
3820	he_5651	5935.68	147.528	1499.35	120.712	0	-1.98508
633	he_5727	8522.89	179.606	25662.8	396.946	0	1.59026
643	he_5727	8070.34	161.969	22920.9	344.878	0	1.50597
623	he_5727	8983.64	78.1232	26773.5	610.825	0	1.57544
3003	he_593	86.8953	9.89153	4357.91	132.34	0	5.64821
2993	he_593	95.0896	23.6175	4747.5	197.387	0	5.64174
2983	he_593	123.472	17.4385	5101.55	250.154	0	5.36868
3024	he_596	30.87	12.2178	850.334	59.4976	0	4.78375
3034	he_596	26.0238	16.1754	793.505	68.229	0	4.93034
3014	he_596	36.469	5.313	853.211	94.7321	2.66454e-15	4.54816
3065	he_598	44.9485	13.1835	1449.35	47.7916	0	5.01099
3045	he_598	65.7114	13.2584	1568.32	92.9145	0	4.57693
3055	he_598	43.1502	15.3923	1494.32	103.927	0	5.11397
3280	he_6015	178.775	15.6396	1307.4	65.0706	0	2.87048
3270	he_6015	177.043	17.7907	1310.23	73.1015	0	2.88765
3260	he_6015	252.405	26.2767	1416.95	94.0428	0	2.48897
3861	he_6041	28665.8	222.185	16701.4	327.193	0	-0.779359
3871	he_6041	27600.1	331.159	16007.9	245.741	0	-0.785889
3851	he_6041	33176.2	468.345	17109.3	379.223	0	-0.955364
3497	he_6831	3192	108.561	19107	235.937	0	2.58157
3487	he_6831	3329.83	111.864	18955.6	337.925	0	2.5091
3477	he_6831	4058.27	87.6272	21925	494.84	0	2.43364
1978	he_6832	1.2854	3.8849	96.2835	23.2617	0.00301094	6.22699
512	he_6833	147.003	22.3502	682.599	51.6684	1.11022e-16	2.2152
502	he_6833	140.823	31.4292	683.824	54.454	2.70894e-14	2.27974
522	he_6833	121.756	15.4032	548.411	55.2759	9.11302e-11	2.17127
3838	he_6835	224.739	29.2783	6801.67	165.455	0	4.91957
3818	he_6835	277.03	22.9692	7079.04	276.466	0	4.67544
3828	he_6835	264.074	28.1891	7385.77	364.897	0	4.80573
2288	he_6836	2793.18	96.466	15705.7	269.109	0	2.49131
2268	he_6836	3662.5	110.707	17531.9	474.522	0	2.25908
2278	he_6836	2858.57	71.7249	14858.9	445.055	0	2.37796
2516	he_6841	94.5794	10.9202	18.9303	10.1072	0.00136938	-2.32083
2598	he_6842	4754.15	95.5871	14161.9	269.798	0	1.57476
2588	he_6842	4912.43	142.317	13469.6	352.685	0	1.45519
2578	he_6842	6229.62	165.975	15895.1	627.508	0	1.35137
59	he_7041	31593.8	391.723	23821.7	383.045	0	-0.407367
49	he_7041	31208.9	282.219	24264.7	571.173	0	-0.363099
39	he_7041	33223	314.078	25831.7	792.614	0	-0.363038
90	he_7043	4631.99	111.929	2098.54	97.9514	0	-1.14224
80	he_7043	4537.6	112.766	2180.83	95.4113	0	-1.05705
70	he_7043	4772.05	81.4152	2327.06	151.201	0	-1.0361
152	he_7253	2772.02	108.639	1596.88	55.9385	0	-0.795687
142	he_7253	2620.85	89.3244	1575.11	103.785	7.65721e-13	-0.734587
132	he_7253	2888.21	89.3544	1707.01	137.619	8.98126e-12	-0.758702
163	he_7363	29134.9	251.721	2278.79	104.605	0	-3.67641
173	he_7363	27236.2	336.566	2207.97	105.589	0	-3.62473
183	he_7363	27221.9	346.803	2126.83	101.972	0	-3.67799
3908	he_7822	82.2858	11.7309	248.512	27.5631	1.52046e-05	1.5946
3928	he_7822	45.6604	10.4304	213.263	29.7279	2.74446e-05	2.22362
3918	he_7822	49.8269	9.82564	183.325	24.9909	0.000156831	1.87941
3086	he_810	11.5962	11.6909	1170.02	74.4112	0	6.65674
3076	he_810	18.236	10.0747	1133.78	135.29	9.32587e-15	5.95821
235	he_8209	679.59	34.8526	63.9299	13.9892	0	-3.4101
225	he_8209	724.705	49.0426	73.3734	23.6257	0	-3.30407
245	he_8209	655.284	58.9912	52.3601	16.0739	0	-3.64558
276	he_8520	11050.4	99.5426	4861.74	119.872	0	-1.18456
266	he_8520	11055.3	153.281	4881.56	88.363	0	-1.17932
256	he_8520	11942.6	165.333	5257.51	120.807	0	-1.18366
2898	he_8535	233.977	18.4059	620.553	55.1879	6.46977e-09	1.40719
2888	he_8535	289.609	35.1838	650.13	55.3395	1.08345e-06	1.16662
2908	he_8535	201.6	26.7028	568.343	62.0873	1.3694e-06	1.49526
369	he_8774	469.346	30.6314	185.682	24.903	4.10999e-09	-1.33782
349	he_8774	495.236	35.2638	184.976	27.114	5.72173e-09	-1.42078
359	he_8774	430.934	38.801	183.861	31.9388	2.93027e-05	-1.22885
400	he_8776	35456.6	389.939	25411.6	313.333	0	-0.480568
380	he_8776	38259.3	239.176	28218	474.639	0	-0.439198
390	he_8776	35084.2	479.84	25317.9	520.375	0	-0.470663
431	he_8778	37588.9	231.101	28535.5	383.227	0	-0.397549
421	he_8778	37859.4	329.936	28751.9	434.946	0	-0.396992
411	he_8778	40941.8	351.81	32009.5	678.526	0	-0.355077
462	he_8779	10328.3	141.22	9122.83	181.259	4.6809e-07	-0.179043
452	he_8779	10355.2	193.541	9083.14	187.323	5.14329e-06	-0.189091
442	he_8779	11317.6	181.108	10174.5	349.301	0.00471645	-0.153618
426	he_8862	277.655	28.7294	652.553	34.0811	1.61615e-12	1.2328
416	he_8862	314.912	35.3424	670.853	59.8064	4.76015e-06	1.09105
406	he_8862	362.495	30.7007	685.83	58.5664	1.40712e-05	0.919889
514	he_9047	4236.22	89.0205	1328.5	96.1758	0	-1.67297
504	he_9047	4568.71	115.046	1592.39	107.517	0	-1.5206
524	he_9047	4088.04	106.565	1322.77	102.498	0	-1.62785
2154	he_9049	16921.7	194.257	6392.99	164.876	0	-1.40431
2144	he_9049	21556.8	415.041	7250.89	247.767	0	-1.57191
2164	he_9049	16190.5	239.101	6688.45	279.494	0	-1.2754
535	he_9053	2018.27	77.8152	546.879	43.4825	0	-1.88382
545	he_9053	1840.49	82.7915	469.537	52.6411	0	-1.97078
555	he_9053	1842.62	86.3238	472.065	58.7844	0	-1.9647
3773	he_9058	2029.66	47.2181	810.354	58.3881	0	-1.32461
3763	he_9058	2224.99	94.3623	830.696	77.558	0	-1.42141
3753	he_9058	2513.57	133.33	1012.85	92.4431	0	-1.31131
1108	he_9059	2247.78	115.92	407.466	44.4643	0	-2.46375
1088	he_9059	2556.91	178.041	515.437	75.5679	0	-2.31053
1098	he_9059	2238.22	184.662	439.228	55.5281	0	-2.34931
2381	he_9068	13910.7	137.661	19867.4	304.396	0	0.514208
2371	he_9068	14805.5	194.684	18254.1	206.088	0	0.302086
2361	he_9068	18680.3	332.21	22145.6	508.287	1.65972e-08	0.245503
576	he_9090	683.781	34.5115	271.577	37.1366	4.17288e-12	-1.33218
586	he_9090	692.347	45.9262	265.062	30.3772	2.20771e-11	-1.38517
566	he_9090	753.567	49.7748	311.122	51.7221	4.13027e-08	-1.27626
729	he_9307	295.635	29.2744	1066.03	89.9279	7.29417e-14	1.85036
719	he_9307	322.587	32.1433	953.133	71.9343	4.81171e-13	1.56299
739	he_9307	281.608	30.4596	862.51	77.1351	1.99206e-10	1.61485
617	he_9463	225.548	22.3561	7983.19	190.213	0	5.14546
607	he_9463	226.281	31.8049	8080.01	255.666	0	5.15817
597	he_9463	256.064	25.6502	8955.3	314.48	0	5.12817
710	he_9634	15223.5	228.368	7931.4	193.336	0	-0.94065
690	he_9634	17092.8	282.507	8767.18	236.6	0	-0.963202
700	he_9634	15129.7	207.932	8032.64	254.786	0	-0.913436
909	he_9637	177.429	18.5814	37.9399	9.53427	2.48425e-06	-2.22545
929	he_9637	179.117	22.3683	36.8806	13.5004	4.59072e-05	-2.27997
919	he_9637	138.403	16.1133	34.7218	14.6785	0.000697119	-1.99496
731	he_9638	188.909	22.5862	36.967	12.4602	1.09804e-05	-2.35338
741	he_9638	173.509	20.7291	35.6706	13.7193	4.14467e-05	-2.2822
721	he_9638	185.299	26.8981	30.0666	11.2018	4.25141e-05	-2.62363
772	he_9646	16320	229.207	5396.4	161.63	0	-1.59657
762	he_9646	16428.5	256.544	5380.73	155.991	0	-1.61033
752	he_9646	14903.7	348.429	4406.92	168.08	0	-1.75783
116	he_9720	39.2943	15.631	2457.52	65.2384	0	5.96674
96	he_9720	54.679	15.2154	2732.4	79.8098	0	5.64304
106	he_9720	36.7047	11.2961	2814.78	206.618	0	6.26091
803	he_9721	146.274	18.0906	7386.73	205.248	0	5.65819
793	he_9721	139.918	13.5073	7255.32	212.435	0	5.69638
783	he_9721	163.276	25.6283	8055.68	315.856	0	5.62462
814	he_9772	6047.38	134.049	4678.88	152.183	1.07972e-10	-0.370146
834	he_9772	5372.49	120.063	4370.73	125.722	4.43066e-08	-0.297716
824	he_9772	5482.21	82.5815	4557.73	161.105	1.19175e-06	-0.26644
855	he_9775	875.832	32.4269	255.812	30.4426	0	-1.77557
845	he_9775	917.343	45.3689	256.042	37.6441	0	-1.84108
865	he_9775	861.985	46.9236	276.794	37.8151	0	-1.63885
886	he_9776	4893.97	74.2956	506.352	30.652	0	-3.27279
896	he_9776	4770.4	79.8647	507.781	41.0592	0	-3.23183
876	he_9776	5390.37	95.4676	555.432	62.5857	0	-3.2787
3107	he_981	110.615	23.6501	5348.27	171.62	0	5.59545
3127	he_981	68.6272	16.8019	4994.14	164.009	0	6.18531
3117	he_981	86.5212	17.6468	5407.75	264.168	0	5.96583
829	he_9860	439.521	32.0477	1078.81	75.0409	1.22224e-12	1.29543
809	he_9860	651.376	91.8761	1401.53	86.7691	2.48917e-08	1.10544
819	he_9860	452.122	86.3046	1102.56	85.2293	5.06813e-07	1.28608
917	he_9882	12872.2	159.199	881.521	70.0492	0	-3.86812
907	he_9882	14581.5	216.505	939.941	75.014	0	-3.95543
927	he_9882	12696.7	224.982	888.386	41.476	0	-3.83712
641	rt_chr1_C_1	89.9196	11.624	29.5218	7.97712	0.00827604	-1.60685
3410	TU100,TU232	146.824	10.4336	37.8628	12.7566	1.54106e-05	-1.95523
3380	TU100,TU232	167.616	18.4127	34.3237	13.5027	2.44603e-05	-2.28788
3390	TU100,TU232	137.979	16.1401	44.1841	16.9316	0.00358944	-1.64285
2087	TU126_1	167.346	24.8052	21.0809	10.8007	4.46501e-05	-2.98883
2107	TU126_1	120.711	20.458	21.8494	8.2011	0.0013437	-2.46589
2097	TU126_1	111.435	18.6702	14.5062	11.2671	0.00153617	-2.94146
2448	TU206	637.718	32.2602	149.754	20.4227	0	-2.09032
2438	TU206	552.203	36.8471	125.823	16.1191	0	-2.1338
2428	TU206	667.183	54.2839	169.938	30.3922	2.52154e-12	-1.97307
3037	TU285	4758.83	129.021	507.373	54.7441	0	-3.22949
3027	TU285	4334.78	133.695	452.832	31.6926	0	-3.25891
3017	TU285	5066.68	171.759	464.978	44.1466	0	-3.44581
3182	TU315	425.82	34.5816	69.1693	14.5316	1.23235e-14	-2.62204
3192	TU315	482.089	40.3588	83.6401	16.8894	3.19744e-14	-2.52703
3172	TU315	517.393	45.7211	89.7625	22.663	8.61422e-13	-2.52707
3234	TU327	417.985	26.3751	78.6138	15.8604	0	-2.41059
3254	TU327	409.011	41.1372	95.6831	25.795	4.7022e-08	-2.0958
3244	TU327	307.085	36.788	79.4576	17.7831	4.59513e-06	-1.95038
3327	TU371	110.167	11.2469	17.5947	7.92897	3.82459e-05	-2.64649
3347	TU371	89.4902	14.2173	19.3323	7.70844	0.00492628	-2.21072
3719	TU452	256.559	15.4264	66.5502	14.4958	2.0173e-10	-1.94677
3699	TU452	269.324	32.2263	54.6504	12.6214	7.5021e-07	-2.30104
3709	TU452	188.102	26.4028	44.9384	15.5712	0.000286117	-2.0655
879	TU56	16694	202.321	521.631	66.1878	0	-5.00016
899	TU56	17078.1	212.933	538.852	51.0313	0	-4.98612
869	TU56	17303.9	241.844	470.951	55.51	0	-5.19937
930	TU600	886.081	45.4021	48.845	12.2651	0	-4.18116
910	TU600	877.567	75.0187	54.8056	9.90596	0	-4.00111
900	TU600	836.983	89.3412	36.295	14.2316	7.77156e-16	-4.52736
2946	TU757	576.167	42.2402	44.5922	12.2338	0	-3.69162
2976	TU757	429.476	32.7529	36.5746	11.4971	0	-3.55366
2956	TU757	434.88	44.554	46.1561	9.97334	9.07718e-13	-3.23603
3379	TU79	1327.57	51.3455	305.214	24.4358	0	-2.12089
3359	TU79	1318.47	57.9697	307.203	38.2658	0	-2.1016
3349	TU79	1525.95	91.3901	320.082	24.9878	0	-2.2532
1180	xbz_1041	153.905	20.0215	31.8435	14.1366	0.000245948	-2.27297
1200	xbz_1041	136.02	22.1467	26.924	7.81685	0.000724626	-2.33685
1190	xbz_1041	110.684	19.2304	26.9118	12.2666	0.00810672	-2.04014
1273	xbz_10532	2427.86	144.343	1243.01	83.9885	1.70661e-11	-0.965843
1293	xbz_10532	1902.59	78.4945	1167.91	66.0576	4.4404e-11	-0.704044
1283	xbz_10532	2057.87	96.2617	1215	106.404	3.31667e-08	-0.760192
1428	xbz_10964	1332.95	72.3979	278.963	27.2024	0	-2.25648
1448	xbz_10964	1061.72	52.9085	241.721	41.7745	0	-2.13498
1438	xbz_10964	1135.77	76.0083	268.677	37.3704	0	-2.07973
3630	xbz_11018	4257.77	68.486	997.883	45.3991	0	-2.09315
3650	xbz_11018	3352.6	87.8918	935.865	59.2869	0	-1.84091
3640	xbz_11018	3541.57	141.368	1026.45	69.555	0	-1.78673
551	xbz_11034	10844.9	193.866	28738.1	426.245	0	1.40595
541	xbz_11034	11631.5	164.231	32235.5	520.486	0	1.47061
531	xbz_11034	12688.5	215.434	29749.7	446.943	0	1.22936
1411	xbz_11316	8925.59	107.904	2412.35	101.632	0	-1.88751
1401	xbz_11316	10202.5	171.2	2295.12	115.604	0	-2.15228
1421	xbz_11316	8341.34	201.842	2061.75	88.8345	0	-2.01641
376	xbz_11369	283.301	25.3793	150.173	31.7275	0.00724149	-0.915711
128	xbz_11688	2664.58	134.072	1261.74	101.033	2.22045e-15	-1.07849
148	xbz_11688	2412.25	68.0599	1260.42	139.799	2.53597e-12	-0.93648
138	xbz_11688	2458.67	112.296	1358.11	101.664	7.04692e-12	-0.856276
1634	xbz_11894	3167.85	77.6484	541.765	68.0968	0	-2.54777
1624	xbz_11894	3294.03	103.106	601.534	54.7827	0	-2.45314
1614	xbz_11894	4000.71	169.982	611.294	67.4849	0	-2.71032
1934	xbz_12	7278.93	165.288	13485.7	308.443	0	0.889635
1944	xbz_12	6743.89	133.414	14326.9	415.528	0	1.08707
1924	xbz_12	8668.16	293.545	14353.4	395.312	0	0.727596
737	xbz_1241	534.589	36.7633	210.889	27.339	3.05441e-09	-1.34194
727	xbz_1241	518.773	24.5959	224.58	44.875	9.46866e-07	-1.20788
717	xbz_1241	587.536	43.4494	251.247	42.3981	1.34493e-06	-1.22557
4	xbz_12548	2291.17	232.019	113.146	23.241	0	-4.33983
24	xbz_12548	2323.91	240.038	98.1263	14.9086	0	-4.56577
14	xbz_12548	2334.97	308.56	113.375	28.3562	3.44635e-12	-4.36423
3723	xbz_12775	27704.5	487.013	15288.9	313.511	0	-0.857637
3743	xbz_12775	21708.1	315.463	14285.3	365.841	0	-0.603701
3733	xbz_12775	23559.8	415.268	15270.7	393.67	0	-0.625559
1432	xbz_12781	7536.08	191.339	2537.69	158.528	0	-1.5703
1442	xbz_12781	6625.98	154.923	2957	107.046	0	-1.164
1452	xbz_12781	6494.89	170.49	2597.22	153.858	0	-1.32234
2203	xbz_13679	224.227	23.391	81.0159	20.4922	0.000333379	-1.46868
2308	xbz_13680	4363.71	118.913	2508.17	134.382	0	-0.798921
2298	xbz_13680	5659.78	181.104	3102.78	226.038	0	-0.867188
2318	xbz_13680	4208.05	119.037	2816.89	136.163	2.39808e-13	-0.57905
696	xbz_13753	12955.1	199.276	32532.2	438.312	0	1.32834
686	xbz_13753	13814.9	312.367	29695.4	263.109	0	1.10402
706	xbz_13753	12192.5	232.62	28892.8	620.45	0	1.24471
1729	xbz_13754	7757.54	199.483	18862.9	329.282	0	1.28188
1719	xbz_13754	7974.55	173.132	20028.2	549.064	0	1.32856
1709	xbz_13754	9868.76	169.989	21460.1	614.018	0	1.12071
1479	xbz_13756	9484.72	203.794	22884.6	360.399	0	1.2707
1469	xbz_13756	10151.4	205.131	23049.7	705.476	0	1.18308
1459	xbz_13756	11970.7	267.833	23950.9	795.176	0	1.00057
2329	xbz_13760	288.722	39.81	85.8945	15.8847	8.7811e-05	-1.74904
2349	xbz_13760	210.838	31.6924	64.3852	21.0698	0.00180924	-1.71134
1223	xbz_13761	16229.5	205.779	55994.2	565.841	0	1.78666
1233	xbz_13761	15164.9	310.704	49119.4	587.683	0	1.69556
1213	xbz_13761	18924.1	260.447	55230.7	1103.67	0	1.54525
954	xbz_13762	575.031	34.07	152.348	16.7702	0	-1.91627
944	xbz_13762	588.242	36.3079	172.377	22.6598	6.66134e-16	-1.77084
934	xbz_13762	687.127	41.9547	172.177	35.8594	7.77156e-16	-1.99669
1130	xbz_13763	12327.9	157.871	45068.2	431.361	0	1.87018
1140	xbz_13763	11375.6	155.959	39363.1	391.585	0	1.7909
1120	xbz_13763	14018.6	261.219	44048.6	871.957	0	1.65176
1035	xbz_13765	12032.6	192.882	44797.7	409.814	0	1.89648
1045	xbz_13765	11047	240.463	41645.4	451.685	0	1.9145
1025	xbz_13765	13481.3	156.541	44605.4	721.327	0	1.72626
345	xbz_13871	98.4905	15.5889	278.978	35.7216	0.000139551	1.5021
355	xbz_13871	93.2978	18.6435	287.808	41.6101	0.000312663	1.62519
365	xbz_13871	74.8218	19.9067	252.592	44.5306	0.00184489	1.75528
3960	xbz_13911	3264.68	63.7889	14524.9	370.029	0	2.15351
3950	xbz_13911	3489.72	129.549	13115.1	293.398	0	1.91005
3940	xbz_13911	4197.46	128.701	16087.2	378.459	0	1.93832
1715	xbz_14049	25862.1	267.821	13467.5	209.424	0	-0.94136
1735	xbz_14049	23739	269.741	13748.1	224.869	0	-0.788034
1725	xbz_14049	21565.7	180.859	12950.5	300.957	0	-0.735729
1901	xbz_14050	691.91	32.8978	151.268	17.9829	0	-2.19348
1921	xbz_14050	663.474	40.5477	156.159	21.9004	0	-2.08703
1911	xbz_14050	523.967	52.1233	111.012	19.4079	1.45054e-10	-2.23876
1870	xbz_14070	944.563	59.7515	136.683	24.4526	0	-2.78882
1890	xbz_14070	904.814	59.8197	146.663	16.8203	0	-2.62512
1880	xbz_14070	799.01	54.8189	133.454	22.6411	0	-2.58187
1746	xbz_14076	18222.4	184.348	7862.91	247.409	0	-1.21258
1766	xbz_14076	16806.4	129.082	8244.46	266.02	0	-1.02751
1756	xbz_14076	15354.6	247.99	7579.17	185.887	0	-1.01856
1463	xbz_14113	857.402	57.9937	21.0225	11.5529	0	-5.34996
1483	xbz_14113	796.144	59.7928	30.8637	9.81049	0	-4.68905
1473	xbz_14113	804.755	71.2751	40.7778	8.6002	0	-4.3027
1494	xbz_14128	11031.8	156.694	3040.65	144.525	0	-1.85921
1504	xbz_14128	9630.54	138.039	3239.04	128.026	0	-1.57205
1514	xbz_14128	9086.7	215.581	2806.34	205.719	0	-1.69507
1777	xbz_14129	22356.8	230.495	17831.2	358.814	0	-0.326315
1797	xbz_14129	20904.2	204.015	18304.8	210.702	0	-0.191571
1787	xbz_14129	18967.3	148.192	17474.9	337.594	8.22133e-05	-0.118224
1808	xbz_14130	4634.77	109.698	1911.33	85.2744	0	-1.27792
1828	xbz_14130	4236.57	105.865	1901.02	104.688	0	-1.15612
1818	xbz_14130	3792.41	143.248	1694.17	99.416	0	-1.16253
1791	xbz_14512	60.7324	12.0626	203.187	30.7438	0.000587274	1.74227
1771	xbz_14512	114.903	14.1056	236.001	27.6769	0.0021524	1.03837
1781	xbz_14512	73.8609	14.0928	185.468	24.385	0.00228176	1.32829
1535	xbz_14675	20161.6	187.623	6449.58	187.34	0	-1.64433
1525	xbz_14675	23528.1	370.758	5959.9	216.691	0	-1.98103
1545	xbz_14675	18685.2	237.604	5679.39	218.865	0	-1.71809
3185	xbz_14983	16033.3	159.539	6688.64	189.583	0	-1.26129
3165	xbz_14983	22711.2	283.446	7673.12	307.554	0	-1.56552
3175	xbz_14983	17272.5	293.023	6213.35	269.788	0	-1.47503
2596	xbz_15144	37.0151	10.4274	408.283	27.3364	0	3.46338
2586	xbz_15144	33.9568	9.86818	390.39	37.4646	4.62963e-14	3.52315
2576	xbz_15144	79.9747	16.9059	410.924	61.3308	4.26054e-06	2.36125
3041	xbz_15227	8632.23	147.028	2462.94	96.0636	0	-1.80935
3051	xbz_15227	6748.17	96.5808	2042.15	102.917	0	-1.7244
3061	xbz_15227	6418.9	103.628	2009.43	102.572	0	-1.67554
853	xbz_15625	11863.7	140.16	1298.02	82.5029	0	-3.19217
843	xbz_15625	12638.4	164.399	1213.38	81.4641	0	-3.38071
863	xbz_15625	11373.3	254.473	1168.03	96.4285	0	-3.28349
2038	xbz_15821	1664.11	57.3772	15918.4	361.684	0	3.25787
2028	xbz_15821	1734.28	96.879	14836.2	349.872	0	3.09671
2018	xbz_15821	2200.97	129.033	16310.2	469.591	0	2.88957
1387	xbz_15823	386.687	50.216	13536.3	397.007	0	5.12953
1367	xbz_15823	531.737	74.1958	16981.4	546.585	0	4.9971
1377	xbz_15823	380.896	37.3307	14712.9	506.931	0	5.27154
894	xbz_15847	17005.8	156.133	5213.8	132.117	0	-1.70562
884	xbz_15847	18514.3	178.075	5623.47	153.859	0	-1.71911
874	xbz_15847	19999.2	305.506	5816.21	164.474	0	-1.78179
1004	xbz_16233	31928.5	259.778	65236.3	554.661	0	1.03083
1014	xbz_16233	29380.5	326.119	62104.2	613.526	0	1.07983
994	xbz_16233	35983.7	276.383	65180.1	723.126	0	0.857089
1635	xbz_16514	3504.48	83.7009	21513.7	305.983	0	2.61798
1615	xbz_16514	4750.3	86.4758	24987.7	402.61	0	2.39513
1625	xbz_16514	3715.34	109.524	22150.2	389.66	0	2.57576
797	xbz_16624	431.976	39.0525	249.441	36.1245	0.00333348	-0.792251
777	xbz_16624	469.555	42.2351	300.786	35.3013	0.00845482	-0.642558
2741	xbz_16788	160.133	19.5815	1191.11	52.1234	0	2.89497
2731	xbz_16788	272.287	19.746	1193.48	80.1489	0	2.13198
2751	xbz_16788	175.466	22.4156	1044.9	80.5316	0	2.5741
915	xbz_17038	11403.1	159.985	3910.99	123.073	0	-1.54382
925	xbz_17038	10724.4	139.027	3587.61	139.364	0	-1.5798
905	xbz_17038	12111.2	227.145	3966.07	241.192	0	-1.61056
3082	xbz_17152	35	12.256	167.869	23.4867	0.000144257	2.26191
3092	xbz_17152	49.1134	12.3094	176.582	30.0313	0.0018082	1.84615
3072	xbz_17152	97.5152	16.095	209.631	28.0395	0.00587452	1.10415
1262	xbz_1728	4583.92	104.032	11071.2	246.408	0	1.27215
1242	xbz_1728	5795.21	180.218	11907.2	433.419	0	1.0389
1252	xbz_1728	4930.96	259.048	11778.9	518.41	0	1.25626
3330	xbz_17454	10283.9	193.889	26370.9	445.526	0	1.35855
3340	xbz_17454	9521.29	119.896	28544	604.097	0	1.58396
3320	xbz_17454	12809.8	198.887	30010.4	744.392	0	1.22822
2204	xbz_18521	1096.69	73.4884	8066.19	210.329	0	2.87873
2224	xbz_18521	816.211	65.0675	8242.9	277.919	0	3.33614
2214	xbz_18521	829.924	57.0118	7498.06	278.914	0	3.17547
1936	xbz_19	1637.56	49.836	665.802	38.3579	0	-1.29838
1926	xbz_19	2096.87	95.8585	847.278	71.3487	0	-1.30733
1946	xbz_19	1618.19	78.327	665.662	56.041	0	-1.28152
1759	xbz_20066	899.843	52.0364	14259.1	233.261	0	3.98606
1749	xbz_20066	959.4	57.0621	14457.2	304.689	0	3.91351
1739	xbz_20066	1245.73	74.658	16767.8	360.118	0	3.75063
1821	xbz_20067	152.382	18.3819	519.734	35.0591	2.23155e-14	1.77009
1811	xbz_20067	147.894	23.9298	453.555	36.9992	5.93851e-09	1.61672
1801	xbz_20067	223.72	33.9553	595.651	46.8912	2.04073e-08	1.41277
3154	xbz_20069	358.119	37.2601	587.254	64.6389	0.00560303	0.713547
1697	xbz_20113	7.77698	8.08204	91.8632	11.6004	0.000206397	3.5622
2896	xbz_20363	76.4888	11.7031	222.178	29.9489	0.000330926	1.53839
2906	xbz_20363	65.5136	16.3007	211.312	37.5784	0.00310153	1.68951
436	xbz_20511	6038.88	99.9681	1593.62	76.8605	0	-1.92197
446	xbz_20511	5516.28	124.573	1432.61	86.1761	0	-1.94505
456	xbz_20511	5324.51	162.571	1400.49	82.0971	0	-1.92672
2121	xbz_21085	11633.6	175.254	43042.7	489.524	0	1.88747
2111	xbz_21085	14932.7	156.47	46171.8	511.501	0	1.62854
2131	xbz_21085	10947.1	153.867	46865.9	888.6	0	2.09799
1491	xbz_21086	323.609	21.6469	61.1307	16.0399	1.80744e-13	-2.40428
1511	xbz_21086	195.322	18.3964	58.5424	14.6987	2.29539e-05	-1.7383
1501	xbz_21086	215.327	35.9019	45.295	22.8177	0.000946759	-2.2491
3433	xbz_21087	14769.1	155.456	55899.3	426.104	0	1.92024
3413	xbz_21087	20082.5	327.614	56465.6	532.637	0	1.49143
3423	xbz_21087	16005.4	260.297	56227.5	1118.39	0	1.81272
2235	xbz_21088	406.751	37.8876	169.721	25.1351	1.27349e-05	-1.26098
2069	xbz_21267	23.6583	10.8101	120.996	16.7532	0.00061488	2.35454
1718	xbz_21465	84.5619	13.3058	170.884	18.1182	0.00523136	1.01494
1159	xbz_2177	328.562	29.2638	2382.87	111.907	0	2.85846
1149	xbz_2177	404.546	42.9255	2606.39	117.215	0	2.68767
1169	xbz_2177	320.744	29.7656	2197.87	135.988	0	2.77661
936	xbz_21862	19225.5	220.205	6219.06	131.298	0	-1.62826
946	xbz_21862	17578.4	168.072	6127.3	162.544	0	-1.52048
956	xbz_21862	16235.9	221.439	5481.76	145.451	0	-1.56648
74	xbz_22825	3278.91	75.5555	9475.59	171.808	0	1.531
64	xbz_22825	3368.57	72.3582	9431.05	203.356	0	1.48528
84	xbz_22825	3282.35	94.0444	8864.13	249.215	0	1.43325
3878	xbz_2283	155.748	21.2601	32.2367	8.89181	0.00010336	-2.27244
3898	xbz_2283	108.099	13.7514	31.3645	11.0028	0.00364522	-1.78515
2999	xbz_23097	2.4587	2.79063	97.7361	22.817	0.00243631	5.31293
2607	xbz_23504	4673.07	111.551	12781.2	255.471	0	1.45158
2627	xbz_23504	3329.52	90.6519	12157.4	403.298	0	1.86845
2617	xbz_23504	3654.96	124.998	12764.3	509.334	0	1.80418
539	xbz_23536	6985.91	105.933	18366.4	288.277	0	1.39455
529	xbz_23536	7443.77	110.53	18558.6	475.703	0	1.31798
549	xbz_23536	6525.58	176.06	16791.1	443.295	0	1.36352
977	xbz_23915	10313.4	239.461	3652.57	81.785	0	-1.49754
967	xbz_23915	11316.5	220.971	3782.43	187.923	0	-1.58104
987	xbz_23915	9955.58	207.966	3472.37	145.613	0	-1.51958
913	xbz_250	809.089	46.41	9032.81	164.467	0	3.48081
923	xbz_250	765.493	37.7487	7911.24	183.591	0	3.36944
903	xbz_250	907.958	46.8324	8644.12	231.886	0	3.25102
808	xbz_25639	5478.99	173.248	1131.64	64.2786	0	-2.2755
818	xbz_25639	4996.3	138.757	1212.87	104.687	0	-2.04244
828	xbz_25639	4719.24	155.282	1065.36	78.4848	0	-2.14722
374	xbz_25711	704.562	42.3743	1521.86	79.84	1.11022e-16	1.11104
394	xbz_25711	616.247	61.4454	1279.39	95.308	4.98733e-08	1.05387
384	xbz_25711	636.249	48.9227	1422.81	152.484	2.89742e-06	1.16108
1008	xbz_25897	13232.9	197.883	5096.31	145.778	0	-1.37661
1018	xbz_25897	12329.9	207.135	4690.04	156.117	0	-1.39448
998	xbz_25897	14643.4	241.967	5175.52	233.029	0	-1.50048
1029	xbz_26076	7881.01	121.543	1274.63	116.326	0	-2.6283
1049	xbz_26076	6794.57	163.718	1124.23	64.3125	0	-2.59545
1039	xbz_26076	7082.31	181.639	1315.45	77.9757	0	-2.42866
653	xbz_26095	3874.73	115.114	172.819	25.5369	0	-4.48676
673	xbz_26095	3394.84	124.303	142.272	30.0028	0	-4.57662
663	xbz_26095	3446.2	150.502	159.417	26.841	0	-4.43413
1070	xbz_26118	10310.6	120.512	3642.61	145.283	0	-1.50108
1080	xbz_26118	9874.27	130.52	3428.85	129.078	0	-1.52595
1060	xbz_26118	11586.1	214.827	3792.85	100.62	0	-1.61104
1101	xbz_26123	9332.61	170.48	4127.17	108.635	0	-1.17713
1111	xbz_26123	9057.07	152.232	3762.98	181.048	0	-1.26717
1091	xbz_26123	10325.1	145.999	4017.44	272.572	0	-1.3618
1142	xbz_26125	8656.65	145.845	3600.23	102.296	0	-1.26572
1122	xbz_26125	10204	195.587	3893.09	181.959	0	-1.39015
1132	xbz_26125	9223.08	293.694	3895.89	89.3596	0	-1.2433
1173	xbz_26127	7567.28	119.49	3017.14	117.347	0	-1.32659
1163	xbz_26127	7922.42	146.107	3267.81	133.314	0	-1.27762
1153	xbz_26127	8824.7	247.549	3238.85	137.032	0	-1.44607
2266	xbz_26373	2068.99	69.9224	12869.8	256.655	0	2.63699
2286	xbz_26373	1615.6	60.951	12754.8	315.484	0	2.9809
2276	xbz_26373	1616.91	56.2715	11828.8	326.826	0	2.87099
1903	xbz_2650	16049.9	145.166	4274.1	117.632	0	-1.90888
1913	xbz_2650	14515	157.611	4394.89	128.217	0	-1.72365
1893	xbz_2650	19489.3	276.467	4559.67	146.598	0	-2.09568
2948	xbz_26952	511.835	33.1618	3057.41	125.492	0	2.57856
2968	xbz_26952	411.787	29.9631	2432.51	132.776	0	2.56248
2958	xbz_26952	414.733	34.2668	2657.82	193.908	0	2.67999
291	xbz_27054	1041.2	51.5846	160.453	28.4318	0	-2.69803
281	xbz_27054	1141.33	54.8685	191.77	34.2572	0	-2.57327
301	xbz_27054	1051.89	53.6539	169.378	28.7597	0	-2.63466
2803	xbz_27255	1199.16	50.3327	7513.1	152.37	0	2.64739
2813	xbz_27255	1115.83	59.2392	6438.25	142.614	0	2.52855
2793	xbz_27255	1594.77	68.9575	7709.97	265.828	0	2.27338
2658	xbz_27256	188.536	17.3668	591.738	41.1964	3.53051e-14	1.65012
2638	xbz_27256	241.206	30.001	615.51	38.5395	6.54407e-11	1.35152
2648	xbz_27256	180.693	23.8119	567.137	56.3803	2.83298e-08	1.65015
3516	xbz_27257	1481.16	77.4582	9181.74	236.409	0	2.63204
3526	xbz_27257	1379.13	54.0663	8783.98	233.498	0	2.67112
3506	xbz_27257	1734.41	74.1332	9250.55	255.34	0	2.41509
3619	xbz_27387	2843.66	61.3134	6843.77	194.543	0	1.26704
3609	xbz_27387	2843.78	141.609	7472.41	251.024	0	1.39377
3599	xbz_27387	3474.22	119.294	7130.46	247.749	0	1.03731
2937	xbz_27388	1.09249	4.10851	100.145	22.454	0.00154284	6.51832
2359	xbz_27398	7373.29	215.037	35426.3	421.141	0	2.26444
2379	xbz_27398	5357.49	106.277	36395.1	545.309	0	2.76411
2369	xbz_27398	5850.76	174.402	34812.5	671.695	0	2.57291
3475	xbz_27400	353.155	28.5995	79.5299	10.2317	2.58504e-12	-2.15073
3495	xbz_27400	259.714	24.399	81.8261	17.7251	4.89199e-06	-1.66629
3485	xbz_27400	249.365	33.5401	62.3919	9.69614	1.89402e-05	-1.99883
260	xbz_27642	4220.25	100.21	10607.5	223.868	0	1.32968
270	xbz_27642	3960.98	86.6282	9638.85	247.126	0	1.283
250	xbz_27642	4477.24	130.795	11063.1	396.549	0	1.30508
694	xbz_27866	6141.3	145.886	2219.7	126.409	0	-1.46818
684	xbz_27866	6625.91	169.791	2280.59	160.726	0	-1.53871
704	xbz_27866	5715.82	160.924	2118.25	133.266	0	-1.43209
2772	xbz_28240	4398.32	120.248	20344.8	537.599	0	2.20963
2762	xbz_28240	5834.93	165.527	20294	627.825	0	1.79827
2782	xbz_28240	4208.65	120.551	17961.5	641.477	0	2.09348
3402	xbz_28242	1459.65	62.9254	10260.2	150.964	0	2.81337
3392	xbz_28242	1596.4	93.2819	9740.61	328.728	0	2.60919
3382	xbz_28242	2003.88	70.5917	10780.3	413.476	0	2.42752
3588	xbz_28291	592.422	36.25	1656.32	76.5258	0	1.48329
3578	xbz_28291	569.658	49.1032	1770.27	104.037	0	1.6358
3568	xbz_28291	756.344	42.9388	1755.59	92.9955	0	1.21484
115	xbz_28632	17568.1	188.257	4612.96	112.539	0	-1.9292
105	xbz_28632	18398.6	174.217	4895.81	219.58	0	-1.90997
95	xbz_28632	19399.7	234.796	5062.68	237.148	0	-1.93806
942	xbz_29013	11132.2	207.418	12178.9	233.48	0.00104302	0.129643
1573	xbz_29172	8134.53	114.761	33421	585.026	0	2.03862
1553	xbz_29172	10426.4	247.234	38839.7	649.36	0	1.89729
1563	xbz_29172	8503.16	125.138	34672.1	1061.35	0	2.0277
890	xbz_29174	8452.31	186.474	33874.8	368.542	0	2.00279
880	xbz_29174	9271.21	179.855	36981	640.225	0	1.99595
870	xbz_29174	10214.1	126.243	37137.9	812.048	0	1.86233
2307	xbz_29215	8290.87	147.788	19723.1	376.891	0	1.25029
2317	xbz_29215	7727	118.809	21527.7	682.193	0	1.47821
2297	xbz_29215	10459.9	162.303	20718.8	542.423	0	0.986072
2472	xbz_29314	2002.91	155.315	5502.93	272.78	0	1.45811
2462	xbz_29314	2070.04	61.5784	5216.79	299.072	0	1.3335
2452	xbz_29314	2715.33	108.312	5512.1	275.642	0	1.02148
3123	xbz_29476	37.1217	10.0478	155.981	31.6647	0.00426824	2.07103
1522	xbz_29532	1957.63	81.9508	6929.57	296.129	0	1.82366
1542	xbz_29532	1537.32	63.0163	5608.92	244.486	0	1.8673
1532	xbz_29532	1544.5	68.1453	5700.4	343.21	0	1.88393
2193	xbz_29533	146.245	19.7282	507.626	36.9495	7.41407e-13	1.79538
2173	xbz_29533	238.473	21.6039	579.095	65.7724	1.12143e-05	1.27997
2183	xbz_29533	159.246	21.8179	463.535	58.8397	1.86739e-05	1.54142
1543	xbz_2993	48.9276	17.2173	412.274	53.2886	1.70557e-08	3.07488
1533	xbz_2993	52.6619	18.5686	475.577	64.7708	2.38437e-08	3.17485
1523	xbz_2993	98.0246	24.1725	432.204	64.956	1.66789e-05	2.1405
2151	xbz_3026	6842.97	141.155	20796.2	457.013	0	1.60363
2161	xbz_3026	6291.98	124.812	21667.9	621.126	0	1.78397
2141	xbz_3026	8772.95	166.358	22586.7	623	0	1.36434
179	xbz_3169	236.936	31.1305	1468.76	75.7283	0	2.63204
169	xbz_3169	251.627	22.011	1607.98	96.011	0	2.67589
159	xbz_3169	277.9	37.0615	1478.01	86.7587	0	2.41102
1246	xbz_3182	28324.5	365.386	9902.45	348.495	0	-1.5162
1266	xbz_3182	23492.2	297.207	9629.95	237.312	0	-1.28658
1256	xbz_3182	24958.7	272.454	10448.7	446.927	0	-1.25622
562	xbz_3731	4278.1	91.2364	19563.7	314.808	0	2.19314
582	xbz_3731	3660.11	102.319	18170	316.755	0	2.3116
572	xbz_3731	3937.28	118.14	20688.3	527.444	0	2.39354
1967	xbz_3732	2.80477	4.66777	103.49	17.6866	0.000171485	5.20547
1977	xbz_3732	1.65649	5.11432	93.441	18.1751	0.000796404	5.81786
1440	xbz_3733	117.676	23.587	722.601	57.9439	0	2.61838
1450	xbz_3733	111.628	21.0957	579.946	50.752	1.55764e-13	2.37722
1430	xbz_3733	174.956	24.0988	699.323	62.4963	3.58524e-12	1.99896
830	xbz_3737	3509.11	72.8754	15852.1	264.434	0	2.17549
820	xbz_3737	3527.67	63.8838	17594.5	380.026	0	2.31834
810	xbz_3737	4020.24	151.748	17004.7	448.348	0	2.08058
500	xbz_3740	124.433	17.5334	22.3394	10.0481	0.00042608	-2.47771
510	xbz_3740	96.807	15.0556	19.2278	12.831	0.0066546	-2.33191
892	xbz_3741	5954.97	117.644	14520.1	259.524	0	1.28589
882	xbz_3741	6240.05	109.293	16551.8	440.73	0	1.40736
872	xbz_3741	7155.9	96.4403	15560.2	409.841	0	1.12065
2182	xbz_4272	29.3652	7.89464	200.894	32.7031	4.5945e-05	2.77425
2172	xbz_4272	71.6894	8.83013	215.224	25.3797	4.89219e-05	1.58601
2192	xbz_4272	23.3506	9.26619	198.48	33.6844	5.40168e-05	3.08746
1297	xbz_4623	9643.97	105.539	4319.74	111.915	0	-1.15868
1287	xbz_4623	10084.5	112.576	4676.96	194.796	0	-1.1085
1277	xbz_4623	11534.7	188.946	4665.72	253.795	0	-1.30581
303	xbz_4638	269.534	28.5958	680.746	50.4816	6.11102e-10	1.33665
293	xbz_4638	330.851	31.3245	777.66	73.1981	3.76325e-07	1.23296
283	xbz_4638	382.625	23.9316	707.497	66.7184	4.07171e-05	0.886793
2370	xbz_4920	12281	109.747	3387.54	152.151	0	-1.85811
2360	xbz_4920	15850.3	300.86	3975.15	182.939	0	-1.99543
2380	xbz_4920	11463.6	203.005	3701.82	170.153	0	-1.63076
1779	xbz_4929	2301.64	62.9384	833.079	45.2082	0	-1.46614
1769	xbz_4929	2725.04	132.975	820.973	63.4919	0	-1.73087
1789	xbz_4929	2146.61	71.5179	829.588	78.3915	0	-1.37159
45	xbz_4935	18040.7	245.644	21413.1	304.206	0	0.247238
55	xbz_4935	17293.1	257.887	19179.6	299.427	2.74543e-06	0.149371
35	xbz_4935	19146.2	147.876	20294.5	410.829	0.00942278	0.0840335
2039	xbz_5066	187.266	14.9875	755.449	72.7674	6.44773e-12	2.01224
2029	xbz_5066	210.068	22.4785	722.16	75.6854	4.50526e-09	1.78146
2019	xbz_5066	299.13	32.2765	879.533	137.67	0.000101954	1.55596
1636	xbz_5186	10502	121.337	6380.29	102.1	0	-0.718975
1616	xbz_5186	13343.3	226.644	7406.52	306.103	0	-0.849251
1626	xbz_5186	10886.8	138.051	6917.62	310.519	0	-0.654232
1318	xbz_5246	15385.2	179.864	5501.4	126.739	0	-1.48367
1308	xbz_5246	17615.4	255.258	5359.52	251.012	0	-1.71666
1328	xbz_5246	14482.9	302.467	4832.98	95.1611	0	-1.58337
1717	xbz_5349	416.304	49.3655	991.9	65.9481	2.26457e-10	1.25256
1727	xbz_5349	378.233	35.7723	1071.54	98.3839	8.4674e-10	1.50234
1707	xbz_5349	506.734	64.8237	1023.68	86.9082	9.25807e-06	1.01446
2153	xbz_5579	30712.3	341.942	65303.1	371.75	0	1.08834
2163	xbz_5579	28606.1	610.026	71964.9	889.382	0	1.33097
2143	xbz_5579	39857.3	576.74	75910.1	856.558	0	0.929449
2194	xbz_5580	21.5165	11.9806	145.873	19.015	5.92416e-05	2.7612
2184	xbz_5580	36.9583	11.3517	157.14	25.6879	0.000998155	2.08808
2174	xbz_5580	64.8964	18.0043	169.672	22.84	0.00517703	1.38654
2070	xbz_6201	1238.62	58.0492	5024.86	195.203	0	2.02035
2060	xbz_6201	1330.51	95.1267	4911.02	193.204	0	1.88404
2050	xbz_6201	1653.48	74.3612	5611.59	260.795	0	1.7629
324	xbz_6473	1757.11	44.2122	5703.71	170.532	0	1.69869
314	xbz_6473	1965.66	90.1027	5183.8	181.423	0	1.39899
334	xbz_6473	1733.13	65.0418	4900.45	192.083	0	1.49953
1915	xbz_6475	5236.92	189.314	11572.4	379.225	0	1.1439
1895	xbz_6475	6609.78	184.191	12927.3	595.732	0	0.967751
1905	xbz_6475	4470.73	171.383	9551.18	502.716	0	1.09517
2267	xbz_701	153.308	10.9098	46.2902	14.7539	7.81709e-05	-1.72766
1192	xbz_702	4062.23	112.123	10729	258.577	0	1.40118
1182	xbz_702	4669.57	158.044	10626.3	236.252	0	1.18628
1202	xbz_702	3836.59	98.9095	9373.13	300.638	0	1.28871
2442	xbz_7110	301.528	19.706	725.374	44.8549	1.66422e-13	1.26643
2432	xbz_7110	264.206	37.5286	667.792	74.41	1.05399e-05	1.33774
2422	xbz_7110	382.172	29.7758	698.981	69.4637	0.000156989	0.871032
1359	xbz_7200	5749.19	115.769	1562.84	86.2959	0	-1.87919
1349	xbz_7200	5927.19	101.387	1821	128.171	0	-1.70261
1339	xbz_7200	6637.78	179.69	1686.95	99.1557	0	-1.97628
1884	xbz_7517	2957.06	105.053	7310.99	284.494	0	1.3059
1874	xbz_7517	3021.24	131.151	7424.03	328.144	0	1.29706
1864	xbz_7517	3672.04	153.047	8229.04	456.091	0	1.16414
1572	xbz_7667	3005.87	83.7232	17814	254.448	0	2.56716
1552	xbz_7667	3823.55	100.028	18668.4	493.674	0	2.28761
1562	xbz_7667	3223.95	74.0349	17821.1	542.934	0	2.46669
221	xbz_8049	470.925	25.4676	1234.43	60.8966	0	1.39028
231	xbz_8049	424.885	29.7356	1345.84	84.4706	0	1.66336
241	xbz_8049	396.416	23.233	1258.85	91.3007	0	1.66701
1388	xbz_8050	10500.6	194.466	25667.6	513.929	0	1.28948
1378	xbz_8050	11018.8	305.382	28809.2	832.811	0	1.38656
1368	xbz_8050	13132.5	459.431	29161.8	775.351	0	1.15093
3805	xbz_8189	581.057	25.0572	1883.64	65.0634	0	1.69677
3795	xbz_8189	575.608	56.0136	1916.92	122.596	0	1.73563
3785	xbz_8189	756.16	42.0122	1904.48	160.59	4.29963e-11	1.33263
975	xbz_8207	200.048	20.9576	863.03	50.8529	0	2.10906
985	xbz_8207	206.029	42.5138	783.292	58.5774	9.09606e-13	1.92671
965	xbz_8207	248.481	23.1333	828.16	90.0106	1.03479e-08	1.73677
3305	xbz_8328	398.231	45.5066	750.921	50.3284	3.67489e-06	0.915055
3315	xbz_8328	425.002	36.5336	806.595	67.4178	7.10603e-06	0.924374
3295	xbz_8328	458.995	31.8118	806.538	64.0566	1.33918e-05	0.813264
1853	xbz_8337	11096.2	194.698	28927.1	498.049	0	1.38235
1843	xbz_8337	11740.5	134.931	29349	692.281	0	1.32182
1833	xbz_8337	14511.5	233.77	33461.2	1177.67	0	1.2053
1254	xbz_8338	10592.2	184.522	26714.9	491.945	0	1.33464
1264	xbz_8338	9939.48	181.121	23423.4	638.702	0	1.23671
1244	xbz_8338	12027.3	252.837	25883.9	787.194	0	1.10574
2244	xbz_8644	6241.61	149.683	560.531	52.2104	0	-3.47705
2254	xbz_8644	5765.9	126.395	575.896	77.9085	0	-3.32366
2234	xbz_8644	7709.83	292.433	573.226	52.8289	0	-3.74952
1016	xbz_9265	4429.11	87.7303	1464.42	77.2916	0	-1.59669
1006	xbz_9265	4751.88	80.8569	1640.73	103.102	0	-1.53416
996	xbz_9265	5282.92	190.423	1665.46	92.9526	0	-1.66542
262	xbz_9343	841.451	57.8191	1935.15	57.1035	0	1.2015
272	xbz_9343	802	28.8022	1629.05	99.9485	1.84519e-13	1.02236
252	xbz_9343	890.29	45.7242	1748.04	102.286	1.03562e-12	0.97339
1409	xbz_9344	158.341	16.4867	369.67	35.9125	1.04822e-05	1.22321
1419	xbz_9344	141.708	24.5996	351.876	46.5691	0.000568585	1.31214
1399	xbz_9344	209.273	30.6751	374.389	42.3225	0.00635809	0.839151
841	xbz_9572	939.852	58.5749	509.054	42.7648	1.2143e-07	-0.884616
851	xbz_9572	814.761	43.7732	514.764	51.5474	8.96534e-05	-0.662465
861	xbz_9572	779.099	58.3947	502.15	51.5948	0.00145943	-0.633689
1215	xbz_998	25666.5	318.931	8769.68	233.075	0	-1.54929
1225	xbz_998	22473.8	270.184	8882.97	203.23	0	-1.33913
1235	xbz_998	21026.2	317.687	7914.43	114.856	0	-1.40963
362	chr10_C_2	8.81164	2.52121	4.8876	8.43338	0.835329
321	chr10_C_2	3.21871	1.87091	1	13.1702	0.899188
3245	chr10_C_2	1	1.39289	1	20.7163	0.992019
3659	chr10_D_4	13.906	4.25855	1	18.9009	0.633019
3689	chr10_D_4	12.8884	4.16912	4.00348	9.94451	0.659584
3669	chr10_D_4	4.18792	2.2961	1	14.3411	0.872063
3555	chr11_A_6	1	1.20713	24.9691	23.4356	0.426456
2842	chr11_A_6	1	1.33656	10.1112	21.4542	0.724147
734	chr11_A_6	1	0.538015	1	47.8905	0.983912
280	chr11_A_7	32.4051	5.0211	11.5172	9.38933	0.286213
3028	chr11_A_7	2.29513	2.11647	7.70409	7.12943	0.723328
920	chr11_A_7	1.51524	1.02755	1	19.779	0.973157
3617	chr12_D_5	1	1.49311	3.96981	15.8198	0.858741
2904	chr12_D_5	1	0.995088	15.1022	19.2501	0.576503
796	chr12_D_5	1	0.800564	1	41.732	0.983631
342	chr13_D_6	15.2774	4.19694	1.70367	8.8309	0.471356
982	chr13_D_6	1.88424	3.07848	1.46486	8.39528	0.994742
3090	chr13_D_6	1	0.336845	1	31.6246	0.982982
300	chr18_B_3	21.1903	5.39249	12.1611	8.96153	0.648517
403	chr18_B_3	14.6993	7.53921	11.3719	9.86254	0.887978
3400	chr18_B_3	1	2.71888	12.5484	11.3636	0.547903
331	chr2_B_2	7.37091	2.93609	1	5.94763	0.66306
290	chr2_B_2	6.64718	3.16087	1	11.0335	0.756148
3214	chr2_B_2	1	0.734988	4.52511	15.7588	0.839384
279	chr2_D_1	19.0685	5.98522	6.87509	6.41033	0.494204
434	chr2_D_1	2.4734	2.23892	1	14.1117	0.929967
3431	chr2_D_1	1	0.616022	1	28.3198	0.982694
3628	chr20_B_4	18.6965	3.7213	1	10.3454	0.370756
3658	chr20_B_4	7.28666	2.99898	1	9.73724	0.719839
3638	chr20_B_4	5.84563	1.90691	1.07699	9.94171	0.812612
3597	chr6_A_4	10.4174	1.72208	1	20.2691	0.733502
3627	chr6_A_4	7.3855	2.9218	5.30868	6.70617	0.910032
3607	chr6_A_4	4.03025	2.50226	1.7331	9.70805	0.915678
765	chr8_B_5	13.1497	3.85311	4.63476	10.2057	0.67551
2873	chr8_B_5	7.90289	3.69582	1.96026	8.86435	0.757551
3586	chr8_B_5	8.11968	3.69362	11.7835	7.82923	0.818655
311	chr9_B_6	9.14986	2.23935	1	16.2706	0.729496
951	chr9_B_6	1.52473	3.09064	3.65313	10.1877	0.89837
3059	chr9_B_6	1	0.547905	1	36.6258	0.983339
948	he_10021	15.1704	5.28318	27.7347	11.3668	0.541174
938	he_10021	23.7208	3.99131	19.9312	8.53727	0.847225
958	he_10021	18.2767	9.10653	14.4128	6.66571	0.859687
969	he_10106	33.892	7.89658	17.0481	7.95538	0.405462
989	he_10106	10.7713	3.97219	11.4514	12.0611	0.960777
979	he_10106	14.9497	4.69823	15.4813	6.6138	0.960888
3148	he_1012	973.631	80.6818	691.649	62.2463	0.0112794
677	he_10364	38.7047	10.0372	112.314	32.2208	0.0793592
657	he_10364	60.47	11.6187	124	39.7761	0.198356
440	he_11072	28.0561	6.01799	9.09493	7.12959	0.298947
460	he_11072	15.9337	6.70125	2.59984	11.1312	0.548848
450	he_11072	20.7364	5.67697	23.6578	9.75796	0.869754
1124	he_11517	32.7607	8.11852	21.4574	7.28462	0.57454
1134	he_11517	14.8981	4.73683	22.2608	9.24591	0.685851
1144	he_11517	18.6718	8.03204	16.1094	7.34051	0.90918
1652	he_11662	17.6359	4.89122	9.89583	10.1033	0.709428
1672	he_11662	7.82453	6.45664	9.11535	11.6832	0.939401
1662	he_11662	1.75601	3.19504	14.5084	13.908	0.565802
168	he_11733	39.9274	11.3361	77.7521	29.4575	0.337841
178	he_11733	43.4088	9.16512	57.6393	9.61006	0.504834
158	he_11733	71.4518	16.7313	83.6742	25.5115	0.741703
1155	he_11751	79.8295	19.1732	25.4091	8.18611	0.067382
1175	he_11751	50.4834	12.238	25.2225	14.2624	0.365998
1165	he_11751	50.323	8.40665	30.8821	10.3219	0.384911
240	he_12051	39.5014	12.5187	127.982	27.325	0.0211865
220	he_12051	60.8515	9.53384	137.439	26.5723	0.0361478
688	he_12052	26.0107	7.06565	13.6724	12.4029	0.60202
698	he_12052	30.0391	7.53918	35.626	10.3409	0.780963
708	he_12052	16.2688	4.57573	14.2954	11.3891	0.938513
3880	he_12203	89.2908	17.7694	170.195	29.2113	0.0565482
13	he_12335	9.08543	3.56942	20.648	13.7167	0.599985
3	he_12335	18.6823	4.85039	17.7905	12.3854	0.981341
23	he_12335	6.32946	4.42021	15.122	8.65855	0.619541
1217	he_12443	26.0346	4.45138	8.65362	10.5067	0.395233
1227	he_12443	5.66858	6.00158	11.9031	7.38516	0.718153
1237	he_12443	3.14136	2.90157	6.77093	10.8607	0.841505
47	he_12546	12.0215	3.45793	23.8669	9.16774	0.509123
37	he_12546	16.4467	4.87652	8.29476	7.93014	0.661946
57	he_12546	8.71838	3.33845	1.15737	12.0979	0.73403
1258	he_12588	7.46824	4.52431	65.5338	13.9083	0.0119189
1268	he_12588	3.97298	3.82214	76.335	20.3503	0.0129821
1248	he_12588	28.057	8.19087	72.3262	14.4529	0.0765101
2272	he_12763	9.80052	3.60788	1	10.0397	0.649453
2292	he_12763	1	1.89162	1	24.4833	0.992395
2282	he_12763	1	1.17435	1	52.0526	0.98407
2113	he_1289	17.1252	5.21819	3.49077	10.185	0.507931
2123	he_1289	7.47918	6.26222	14.7082	11.9143	0.730397
2133	he_1289	1.46639	4.29231	6.3725	13.6019	0.816829
3012	he_13009	15.7676	6.00496	14.7841	12.4518	0.97884
3022	he_13009	2.94449	2.8557	19.0261	14.6509	0.483882
3032	he_13009	1	2.25434	3.19741	11.0875	0.874325
119	he_13117	26.3745	6.09638	10.1037	11.0473	0.454084
99	he_13117	27.6843	5.23721	16.6458	6.91661	0.53479
109	he_13117	25.2523	8.51083	34.5233	11.8444	0.676897
1279	he_13183	31.7755	4.8727	10.862	8.6434	0.2669
1289	he_13183	8.15231	6.1064	11.3059	8.57892	0.855658
1299	he_13183	4.29163	4.42648	2.76612	9.38927	0.949782
902	he_138	40.4151	6.34061	18.102	14.2174	0.365464
922	he_138	10.0909	5.46966	22.6992	9.18684	0.502886
912	he_138	13.0721	7.83498	20.7293	11.2889	0.719133
1403	he_13939	225.156	18.8702	191.496	32.0663	0.473293
1413	he_13939	167.224	20.7821	160.656	25.1958	0.887239
1423	he_13939	165.721	20.5302	165.635	30.978	0.987705
2210	he_13993	27.9875	9.35643	21.0675	11.2864	0.779563
2220	he_13993	2.39473	3.80227	6.8889	9.48899	0.798168
2230	he_13993	1.16105	2.42906	1	21.7169	0.985208
344	he_14144	31.3302	6.54826	15.8515	11.6541	0.492403
364	he_14144	22.2181	4.20374	17.4046	8.74426	0.806191
354	he_14144	17.8806	7.65546	17.0619	11.7973	0.985002
1475	he_14371	3.93007	2.90831	20.9433	9.83861	0.358545
1465	he_14371	24.8442	6.1968	17.5301	8.93359	0.72047
1485	he_14371	1	1.3786	31.8232	30.4752	0.406275
2582	he_14382	129.191	16.7734	48.1218	15.7201	0.0108649
2602	he_14382	95.8411	14.6819	38.5141	14.5855	0.0526426
2592	he_14382	80.605	16.9835	42.0735	15.9013	0.233687
1558	he_14400	19.7112	5.17518	8.23078	10.8978	0.590862
1568	he_14400	5.80366	4.5151	14.7397	13.07	0.677956
1578	he_14400	1.05973	2.47104	1	15.5022	0.981324
2179	he_14700	13.9431	5.60702	8.04663	6.65873	0.746738
2199	he_14700	1	1.32271	18.4609	27.0039	0.592716
2189	he_14700	1	0.629402	1	52.8206	0.984096
1281	he_15138	25.6832	6.42767	9.42142	5.84779	0.356608
1301	he_15138	19.4132	4.91271	10.9808	9.77084	0.679045
1291	he_15138	7.66236	4.71948	12.3434	9.76165	0.79662
1312	he_15155	17.6711	4.22604	10.672	6.17462	0.676521
1332	he_15155	2.39954	2.37312	1.80552	9.38568	0.987901
1322	he_15155	1	1.78114	1	24.2629	0.99072
1343	he_15187	9.01863	1.91105	3.30168	5.24446	0.700166
1353	he_15187	1	0.745914	1	33.9501	0.983159
1363	he_15187	1	0.410535	1	43.323	0.983709
1374	he_15199	16.2637	7.41864	10.7059	7.62367	0.786213
1394	he_15199	3.27001	3.50218	8.58824	12.1377	0.789126
1384	he_15199	1	2.17253	7.96498	30.1319	0.824045
1405	he_15200	8.46752	3.36859	1	14.2681	0.730869
1425	he_15200	2.05226	1.60042	1	12.2309	0.938202
1415	he_15200	1	0.97916	1	50.3618	0.984008
1436	he_15201	19.1422	4.34573	7.44923	7.76018	0.515617
1456	he_15201	8.79061	5.34841	5.82453	8.09165	0.885048
1446	he_15201	1.99272	4.36304	6.9319	14.3355	0.820833
2815	he_15397	72.1549	9.04834	133.616	15.988	0.0217974
2805	he_15397	61.3504	8.50445	121.182	31.2183	0.139614
2795	he_15397	109.182	14.3948	123.265	22.7263	0.679102
3043	he_15616	15.7253	3.71639	4.6563	7.10374	0.517119
3053	he_15616	2.16769	3.07746	17.7351	12.3643	0.455767
3063	he_15616	1	2.88439	22.4012	33.2633	0.582021
1630	he_15724	27641.2	199.708	27578	644.047	0.940001
3202	he_15944	14.0366	6.40001	8.10764	9.13809	0.777617
3222	he_15944	7.67443	5.82538	12.8016	11.281	0.796605
3212	he_15944	1	2.06295	7.98213	43.2727	0.864289
2671	he_15980	15.9111	3.63789	9.64931	16.9393	0.822755
2681	he_15980	1	2.63829	11.9828	12.1871	0.570002
2691	he_15980	1	1.83271	34.2162	24.9158	0.300529
137	he_16205	17.9875	4.81317	36.7835	9.9658	0.331189
147	he_16205	40.8036	7.79882	50.3264	14.9014	0.695404
127	he_16205	39.4718	6.23658	35.5843	11.2759	0.870179
3959	he_16206	10.1899	5.18881	52.5835	23.8222	0.193028
3949	he_16206	27.1916	7.41536	44.3046	12.9211	0.456418
3939	he_16206	43.7318	9.75228	44.9075	13.7484	0.949434
878	he_16289	28.9641	4.78944	15.6481	6.43445	0.43386
888	he_16289	12.5419	4.72008	5.12845	8.89868	0.704557
898	he_16289	12.6051	4.98575	12.9461	10.6282	0.972858
1651	he_16347	29.5569	9.78084	125.381	41.8676	0.0609885
2086	he_1662	13.8392	3.57075	4.86636	8.94452	0.635363
2096	he_1662	1	0.779437	1	42.5887	0.983674
2106	he_1662	1	0.474079	1	41.6031	0.983624
1713	he_16687	8.52242	2.31659	1	15.4415	0.739874
1723	he_16687	1.98662	2.84835	13.4395	10.7977	0.551235
1733	he_16687	1	1.72505	1	25.2401	0.986064
3229	he_16732	20.6416	4.64669	4.743	6.69938	0.352248
3239	he_16732	2.07109	3.7499	4.00203	11.2522	0.911192
3249	he_16732	1	1.93039	1	13.3907	0.975124
1201	he_16755	5.98614	4.15293	18.3548	8.91045	0.491815
1181	he_16755	32.7065	4.5569	19.1735	20.0184	0.654971
1191	he_16755	10.2027	5.30862	7.94691	11.5201	0.929424
816	he_16903	23.3784	6.80973	9.46925	9.11873	0.497815
836	he_16903	19.4454	5.99341	9.60036	9.10103	0.626268
826	he_16903	10.6844	4.08889	4.63767	6.91313	0.729559
264	he_17154	42.5053	11.3054	54.7679	7.03265	0.564487
254	he_17154	37.9634	7.45186	26.7463	11.606	0.629049
274	he_17154	38.3389	11.658	26.4033	14.9562	0.677895
313	he_17193	24.8373	4.67951	10.4432	10.0004	0.474857
323	he_17193	12.4193	5.2724	13.0032	8.14219	0.960805
333	he_17193	15.3016	6.12738	15.4607	9.46048	0.979836
3687	he_17301	10.8025	3.31931	22.2878	10.894	0.554433
3667	he_17301	24.2957	5.66621	18.6633	4.99504	0.740771
3677	he_17301	9.51843	7.03005	12.7769	13.4263	0.877373
1806	he_17423	25.5039	9.52457	7.45091	10.8781	0.44442
1816	he_17423	4.79592	3.21322	18.8932	10.4097	0.459628
1826	he_17423	2.99246	3.50356	3.29552	11.5614	0.974537
840	he_17443	22.8356	3.87901	7.79212	7.56491	0.389215
860	he_17443	7.84001	4.39073	12.4803	8.69736	0.787239
850	he_17443	6.78874	4.78135	6.43336	7.70972	0.997768
1033	he_17916	21.0483	3.47853	10.2524	8.0532	0.546357
1053	he_17916	13.9463	3.20085	5.43851	7.80079	0.630179
1043	he_17916	11.7973	6.82934	8.51652	9.49706	0.885386
2540	he_18076	26.0743	10.5379	55.0253	18.3995	0.323236
2530	he_18076	14.6359	9.06688	29.1122	13.7626	0.552603
2520	he_18076	47.9646	11.0758	39.1322	18.9023	0.785638
499	he_18321	13.5906	3.31992	1	12.025	0.539349
519	he_18321	8.25261	4.73924	6.05899	6.342	0.908194
509	he_18321	2.79495	2.26129	1	12.8369	0.913314
3291	he_18422	30.2518	5.5939	9.80373	7.24784	0.257352
3311	he_18422	3.79144	5.07318	6.58297	12.3299	0.885179
3301	he_18422	1.83966	2.66401	2.25048	10.2657	0.969174
2489	he_18466	10.4737	6.57685	4.12327	10.961	0.779979
2499	he_18466	2.3715	5.34056	11.508	11.8011	0.65945
2509	he_18466	1	2.56656	2.57494	16.5191	0.907344
2454	he_18518	18.8558	8.22346	8.89235	7.45149	0.625638
2464	he_18518	1	4.21514	14.6374	13.8054	0.532275
2474	he_18518	1	0.686411	1	60.932	0.984343
378	he_18545	23.5427	8.09759	6.67375	7.85137	0.406432
398	he_18545	8.29151	2.59234	1	18.2423	0.773976
388	he_18545	15.5063	5.80553	12.7635	6.71147	0.889097
34	he_18658	17.4979	4.61621	9.79337	8.59113	0.68774
44	he_18658	10.1328	3.7974	15.0334	8.25668	0.768812
54	he_18658	6.37091	4.28235	15.3619	10.0869	0.633812
3729	he_18859	23.981	4.62411	15.8491	7.58198	0.654724
3749	he_18859	14.3857	4.74018	12.933	12.1582	0.960333
3739	he_18859	7.81807	4.78586	12.8302	8.54864	0.772322
1992	he_19075	16.5703	4.03244	3.93944	6.70763	0.452993
2012	he_19075	1	1.35103	1	17.9568	0.999104
2002	he_19075	1	1.59867	25.9076	17.0553	0.306255
1962	he_1916	21.247	4.0496	8.91731	9.56423	0.527892
1982	he_1916	2.53742	2.82283	1	15.8153	0.933917
1972	he_1916	1	1.09361	11.1261	29.0724	0.754869
3598	he_19342	32.7749	8.85738	9.37516	6.54726	0.24035
3608	he_19342	9.28937	3.88468	5.42913	9.68262	0.853025
3618	he_19342	5.62137	5.80601	14.572	9.82174	0.642636
2023	he_19455	1255.44	43.6721	1362.63	110.179	0.389585
2043	he_19455	1140.42	72.9174	1201.51	80.9085	0.591244
2033	he_19455	1100.29	52.2251	1133.81	85.9656	0.745779
2828	he_197	62.3143	15.7907	19.7867	6.29077	0.100505
2838	he_197	58.6168	14.9977	35.1659	13.0967	0.42112
2848	he_197	44.3041	11.6362	31.7006	9.68166	0.607885
189	he_19849	58.6849	7.43041	41.4197	10.8099	0.437301
199	he_19849	25.4514	8.90084	42.5698	15.9885	0.51372
209	he_19849	38.6077	5.60741	47.3147	12.7436	0.686637
375	he_19909	23.6072	4.81024	4.99894	9.3329	0.339241
385	he_19909	12.0254	5.2307	7.06973	10.6996	0.822729
395	he_19909	12.8699	5.69956	8.27278	12.3255	0.849509
3660	he_19925	27.6545	6.1268	4.1977	7.38229	0.204027
3670	he_19925	5.8526	2.29332	5.8361	8.9496	0.986948
3680	he_19925	1.34201	2.07281	3.20964	10.3642	0.90878
3698	he_19980	18.9839	4.11081	12.9449	7.94533	0.74413
3718	he_19980	8.20046	5.68435	11.3813	10.1603	0.861693
3708	he_19980	1.71897	3.17228	1.99481	5.75392	0.971734
2116	he_20127	20.5747	5.24952	7.33421	9.4103	0.505947
2126	he_20127	5.48411	4.46241	16.0662	8.26589	0.545488
2136	he_20127	2.92621	4.05757	8.49376	10.3437	0.76466
2167	he_20131	9.15465	6.88908	87.6073	21.779	0.0120621
2157	he_20131	2.54412	4.75415	104.688	32.5395	0.0132147
2147	he_20131	28.1839	8.22197	94.6663	18.5493	0.020534
2075	he_20265	12.4262	8.12812	73.0118	19.4937	0.0399741
2065	he_20265	13.929	7.11777	67.0899	20.7391	0.0788733
2055	he_20265	35.1883	7.05771	80.0316	17.889	0.103727
3911	he_20337	14.3092	4.81541	4.70661	12.8089	0.67951
3921	he_20337	8.69783	2.89107	7.7298	6.64603	0.965143
3931	he_20337	1	0.909822	1	21.0374	0.990541
2148	he_20375	12.4296	5.10779	12.43	12.2138	0.986198
2158	he_20375	1	2.37858	12.2483	16.4597	0.62685
2168	he_20375	1	1.06883	10.0564	21.4667	0.725491
2020	he_20416	65.8307	15.8417	25.5154	14.0528	0.181723
2030	he_20416	46.4023	6.81764	30.1478	12.8283	0.4935
2040	he_20416	27.7953	10.2422	16.8451	9.73103	0.642675
1026	he_20459	42.6984	7.07827	20.0393	8.55082	0.257896
1046	he_20459	12.1979	6.12591	23.3111	7.15759	0.52669
1036	he_20459	14.6143	4.35968	20.9147	8.3914	0.714582
2281	he_20697	7.13205	5.67778	18.8049	8.34517	0.521625
2271	he_20697	21.1493	7.73845	13.7641	13.2073	0.770829
2291	he_20697	4.66194	3.34357	7.36794	12.9354	0.888378
2322	he_20870	63.3972	12.4264	6.66905	6.6733	0.0131992
2312	he_20870	74.4427	18.3316	18.4843	8.93862	0.0560136
3567	he_20910	27.8928	4.27975	9.28073	6.5028	0.26406
3587	he_20910	8.83922	6.25016	18.9799	13.513	0.653768
3577	he_20910	12.9446	6.93502	9.91725	5.82193	0.877659
2384	he_20915	300.192	34.0025	182.729	28.877	0.0285843
2374	he_20915	274.846	21.8991	189.4	20.7455	0.0288584
2488	he_20942	24.0542	5.75781	10.9512	7.15649	0.472525
2498	he_20942	12.1584	6.91032	22.6422	10.111	0.603378
2508	he_20942	2.41421	2.6828	1	23.7422	0.95614
2334	he_21097	32.522	17.3238	13.4059	9.55067	0.512065
2354	he_21097	2.64814	3.8397	14.9772	9.4402	0.501278
2344	he_21097	2.746	7.46925	14.2357	14.7672	0.635729
1139	he_21132	18.6786	7.87195	40.1671	13.7527	0.370598
1119	he_21132	55.3129	8.57314	48.3261	14.4371	0.796711
1129	he_21132	27.4817	11.919	30.9948	12.0842	0.877204
429	he_21320	15.1109	5.36105	9.57909	8.45824	0.779873
419	he_21320	19.5602	6.06467	23.9648	8.36573	0.80289
409	he_21320	19.6786	4.3346	16.4927	15.1662	0.909804
2458	he_21337	13.5479	5.37919	10.1975	9.6678	0.878494
2478	he_21337	1.91034	3.89316	2.21339	16.2528	0.976672
2468	he_21337	1	1.76567	5.38016	28.4816	0.871283
3725	he_21527	18.6135	4.84674	9.11823	12.9633	0.685205
[truncated: 1,949 more rows]

## Sheet: 差异数据
		Sample A			Sample B			log2(Sample B/Sample A)
No.	探针_ID	信号中值	重复探针点间标准偏差	重复探针点间变异系数	信号中值	重复探针点间标准偏差	重复探针点间变异系数	中值	重复探针点间标准偏差	重复探针点间变异系数
1	he_1011	744.279	71.6753	0.0963016	102.531	7.43027	0.0724685	-2.85978	0.0425465	0.0148775
2	he_1012	947.051	49.2421	0.0519951	611.541	28.9164	0.0472845	-0.630824	0.00680441	0.0107865
3	he_10229	487.417	39.1422	0.0803054	230.939	35.4426	0.153472	-1.08782	0.128639	0.118254
4	he_10363	32679.9	5551.68	0.169881	71075.8	5396.77	0.0759297	1.14965	0.255232	0.222009
5	he_10527	7436.79	611.437	0.0822179	4476	324.768	0.0725578	-0.732423	0.0274177	0.0374343
6	he_10552	13.8163	12.7138	0.920199	323.599	15.4834	0.0478475	4.54976	0.905255	0.198968
7	he_10636	172.807	31.7192	0.183553	338.513	29.2664	0.0864557	0.970052	0.170812	0.176086
8	he_11181	2058.35	230.174	0.111825	189.811	12.2783	0.0646873	-3.43886	0.0809637	0.0235438
9	he_11413	22.4506	17.9064	0.79759	558.355	26.7191	0.0478533	4.61513	0.676279	0.146535
10	he_11415	16.8143	13.765	0.818646	376.46	7.81702	0.0207645	4.48474	0.916938	0.204457
11	he_11553	711.528	114.744	0.161265	5554.34	231.551	0.0416883	2.96462	0.155907	0.052589
12	he_11555	1491.28	206.71	0.138613	6400.78	383.298	0.059883	1.94654	0.174152	0.0894675
13	he_11793	5705.47	443.649	0.0777585	4549.03	384.71	0.0845698	-0.326788	0.00991794	0.0303498
14	he_12202	1868.56	51.0738	0.0273332	5986.22	511.902	0.0855134	1.66189	0.0980798	0.059017
15	he_12203	55.1719	9.0344	0.16375	192.126	10.8469	0.0564572	1.80863	0.155812	0.0861489
16	he_12204	7861.58	446.967	0.0568546	15694.7	592.657	0.0377617	1.02089	0.0486294	0.0476342
17	he_129	23.5931	11.1523	0.472696	307.235	29.3036	0.0953786	3.70291	0.634504	0.171353
18	he_13388	313.326	59.9955	0.19148	857.258	84.4374	0.0984971	1.20454	0.197612	0.164056
19	he_13555	5884.4	350.401	0.0595475	1644.63	117.235	0.0712834	-1.83913	0.0182976	0.00994903
20	he_13758	11452.1	1002.83	0.0875678	5258.32	391.84	0.0745182	-1.13208	0.0297248	0.0262567
21	he_13856	12469	910.956	0.0730579	815.218	96.2537	0.118071	-3.93501	0.0637979	0.0162129
22	he_14017	27185.9	2636.65	0.0969859	11729	883.393	0.0753171	-1.24791	0.0420746	0.0337161
23	he_14115	2884.02	437.029	0.151535	7921.58	605.082	0.076384	1.34152	0.140498	0.10473
24	he_14386	149.43	16.5101	0.110487	6507	524.917	0.0806695	5.44445	0.045228	0.00830718
25	he_14393	20.5755	25.6174	1.24505	1056.65	97.6702	0.0924339	5.68243	1.02515	0.180407
26	he_14422	48.7572	20.7219	0.425001	214.983	24.5563	0.114224	2.14053	0.348397	0.162762
27	he_14423	3511.06	283.722	0.080808	21197.3	1719.68	0.0811274	2.51394	0.0477163	0.0189807
28	he_1492	238.972	44.9273	0.188003	87.9484	7.34573	0.0835232	-1.52749	0.143654	0.0940457
29	he_1493	2244.49	359.713	0.160265	6023.16	208.962	0.034693	1.40489	0.160395	0.11417
30	he_15140	230.549	58.2251	0.25255	901.055	59.5907	0.0661344	1.87981	0.234416	0.124702
31	he_15142	9565.6	1547.6	0.161788	27077.2	2404.47	0.0888004	1.36063	0.137046	0.100723
32	he_15370	602.299	69.9948	0.116213	1927.24	214.901	0.111507	1.66402	0.0939674	0.0564701
33	he_15398	206.279	15.0841	0.073125	821.773	53.1509	0.0646783	1.955	0.101933	0.0521394
34	he_15588	10318.2	719.726	0.0697527	197.697	37.0535	0.187426	-5.76753	0.21347	0.0370123
35	he_15624	280.511	28.6227	0.102037	525.513	49.7889	0.0947435	0.849557	0.0325975	0.03837
36	he_15651	11348.3	1571.69	0.138495	30948.6	861.537	0.0278377	1.47926	0.194662	0.131594
37	he_15653	8824.02	1355.1	0.153569	24748.9	1247.14	0.0503917	1.46517	0.152432	0.104037
38	he_15724	30315.4	3180.2	0.104904	27897.7	2523.36	0.0904505	-0.118881	0.0209519	0.176243
39	he_1586	9011.43	532.517	0.0590935	4460.2	169.733	0.0380549	-0.938288	0.0753102	0.0802634
40	he_16347	5.88835	2.21363	0.375934	129.766	24.2628	0.186973	4.50205	0.28437	0.0631645
41	he_16349	40.6095	14.4127	0.354909	2826.28	117.182	0.0414615	6.06553	0.360297	0.0594007
42	he_16726	6325.67	407.216	0.0643752	2869.83	163.628	0.0570168	-1.23013	0.0562503	0.0457271
43	he_17153	4726.01	687.693	0.145512	35121.5	2665.56	0.0758954	2.74013	0.137486	0.050175
44	he_17291	4259.56	326.09	0.0765547	1437.92	116.869	0.0812766	-1.60363	0.0920353	0.0573917
45	he_17407	34.7173	18.2116	0.524567	749.864	43.7157	0.0582982	4.4329	0.571973	0.129029
46	he_17441	107.059	26.6986	0.249382	10092	743.087	0.0736313	6.55866	0.241744	0.0368587
47	he_17477	760.084	59.0472	0.0776851	1730.34	149.304	0.0862856	1.20364	0.0583251	0.0484572
48	he_17478	155.085	23.0044	0.148334	360.746	9.02473	0.0250168	1.2345	0.206633	0.167382
49	he_17857	992.562	45.3081	0.0456476	620.151	76.556	0.123447	-0.750156	0.159572	0.212718
50	he_18129	528.845	46.683	0.0882736	95.6158	4.47953	0.0468493	-2.46752	0.198894	0.0806047
51	he_18225	20969.8	2087.78	0.0995612	9167.75	387.167	0.0422314	-1.23729	0.0878428	0.0709961
52	he_18278	25328	2684.24	0.105979	11776.8	479.351	0.040703	-1.17021	0.106664	0.0911495
53	he_18955	578.786	40.8376	0.0705573	226.889	16.5178	0.0728012	-1.37393	0.198168	0.144235
54	he_19454	7992.04	973.652	0.121828	1830.15	156.261	0.0853815	-2.21435	0.0850157	0.0383931
55	he_19742	21605.3	2388.58	0.110555	9688.31	278.335	0.028729	-1.17718	0.111531	0.0947446
56	he_1991	18745.2	1896.52	0.101174	8610.75	279.417	0.0324497	-1.17241	0.115829	0.0987955
57	he_20008	5535.88	468.146	0.0845657	2472.97	49.2781	0.0199267	-1.17634	0.0903848	0.0768357
58	he_20151	16065.5	1816.08	0.113042	6454.25	50.1661	0.00777257	-1.31636	0.139261	0.105793
59	he_20180	1587.77	157.496	0.0991935	726.782	60.6607	0.0834648	-1.12741	0.0201656	0.0178867
60	he_20181	1259.15	147.463	0.117113	88.3106	9.35299	0.10591	-3.88256	0.0282296	0.00727087
61	he_20271	1241.76	70.8301	0.0570402	310.417	28.4909	0.0917824	-2.0166	0.0956564	0.0474346
62	he_2031	13185.2	714.878	0.0542182	800.222	52.6174	0.0657535	-4.00589	0.0854261	0.0213251
63	he_20374	9707.43	1308.58	0.134802	31447	2091.91	0.0665215	1.56468	0.145832	0.0932024
64	he_2066	168.322	15.3901	0.0914324	22.8778	2.52861	0.110527	-2.78167	0.179924	0.0646819
65	he_20896	4399.72	471.966	0.107272	2766.21	58.025	0.0209763	-0.676052	0.114371	0.169174
66	he_20919	7568.39	850.554	0.112382	2114.27	72.4201	0.0342531	-1.81319	0.179381	0.0989312
67	he_20922	112.456	23.2127	0.206415	28.0143	2.48621	0.0887479	-1.97472	0.379559	0.192209
68	he_20936	679.914	60.2241	0.088576	249.126	16.8666	0.0677033	-1.48733	0.116292	0.0781884
69	he_20939	6050.56	493.186	0.0815108	574.989	74.9231	0.130303	-3.35088	0.127603	0.0380804
70	he_20968	8104.98	1170.01	0.144357	3074.11	74.5554	0.0242527	-1.4224	0.218821	0.153839
71	he_21018	438.104	33.7778	0.0770998	83.6319	7.26006	0.0868097	-2.47164	0.189219	0.0765563
72	he_21059	28.842	7.10447	0.246324	2569.92	53.5718	0.0208457	6.4585	0.300158	0.046475
73	he_21561	35131.5	3836.28	0.109198	18901.1	834.828	0.0441683	-0.894299	0.0893303	0.0998887
74	he_21566	10191.6	1102.25	0.108153	816.438	6.43357	0.00788006	-3.63879	0.154572	0.042479
75	he_21594	69.7831	12.9713	0.18588	423.347	47.6036	0.112446	2.84382	0.318665	0.112055
76	he_2174	1499.83	159.727	0.106497	182.662	50.3519	0.275656	-2.99077	0.21034	0.0703297
77	he_21871	1	0	0	1742.06	132.857	0.0762642	10.7645	0.110133	0.0102311
78	he_21872	47.1653	7.33562	0.15553	1504.38	71.8921	0.0477884	4.88631	0.278516	0.0569992
79	he_21873	127.724	27.5537	0.215728	6746.19	374.824	0.0555607	5.72808	0.238878	0.0417029
80	he_21878	1183.23	77.9869	0.0659104	370.018	14.3039	0.0386574	-1.67706	0.0506473	0.0302001
81	he_21967	5308.79	518.759	0.097717	1990.31	141.833	0.0712616	-1.57403	0.101719	0.0646232
82	he_22155	7.07142	8.13221	1.15001	96.8041	5.12077	0.0528983	3.775	1.16889	0.30964
83	he_22404	7.90526	7.22325	0.913727	205.369	10.6768	0.0519883	5.08806	1.64315	0.322943
84	he_22545	4.71171	1.83893	0.390289	77.6511	2.53787	0.0326829	4.09944	0.530894	0.129504
85	he_22725	2315.92	194.687	0.0840647	1373.71	60.2852	0.0438849	-0.785811	0.0663776	0.0844702
86	he_23347	1003.99	118.544	0.118073	442.693	31.8734	0.0719988	-1.18137	0.0704011	0.0595928
87	he_23413	12541.5	1236.85	0.0986202	2720.86	189.793	0.0697546	-2.2282	0.0548855	0.0246322
88	he_23428	5947.63	492.159	0.0827488	2674.57	180.039	0.0673151	-1.15301	0.0217584	0.018871
89	he_23458	877.684	210.295	0.239603	485.78	50.0543	0.103039	-1.01753	0.215342	0.211633
90	he_2348	5606.51	547.185	0.0975983	595.65	16.0363	0.0269224	-3.20702	0.152004	0.0473974
91	he_23737	229.9	19.5452	0.0850158	69.0768	6.42661	0.0930358	-1.73473	0.255379	0.147215
92	he_2388	2072.09	158.25	0.0763724	391.608	27.4821	0.0701776	-2.347	0.164897	0.0702587
93	he_24	9290.71	1058.9	0.113974	19864.9	1348.89	0.0679031	1.00684	0.137509	0.136576
94	he_24277	8.1115	8.57017	1.05655	154.842	12.0762	0.0779906	4.23648	2.25561	0.532425
95	he_24403	728.29	40.7916	0.0560102	377.338	1.49055	0.00395018	-0.942311	0.0824771	0.0875264
96	he_24677	186.478	12.7907	0.0685908	1545.32	141.812	0.0917683	3.01808	0.0484092	0.0160398
97	he_24979	1071.53	57.1271	0.0533138	1711.38	52.5989	0.0307348	0.675491	0.0315496	0.0467061
98	he_24981	6722.48	172.511	0.0256618	4729.91	378.79	0.0800841	-0.534962	0.0952892	0.178123
99	he_25	398.988	46.6174	0.116839	3026.18	352.261	0.116404	2.93185	0.0230482	0.00786132
100	he_25080	13099.5	741.706	0.056621	31592.7	1784.92	0.0564979	1.23202	0.0239667	0.0194532
101	he_25081	7363.96	1029.28	0.139773	20042.9	1597.36	0.079697	1.30325	0.12966	0.0994893
102	he_25083	11870.7	791.365	0.0666651	29199.4	2122.8	0.0727001	1.23419	0.0428678	0.0347335
103	he_25098	249.372	51.0214	0.2046	80.509	12.8308	0.159371	-1.41288	0.317066	0.22441
104	he_25099	13665	2208.75	0.161636	53325.9	4118.78	0.077238	1.81862	0.158329	0.0870603
105	he_25100	582.754	74.0803	0.127121	169.816	17.3503	0.102171	-1.91032	0.105053	0.0549923
106	he_25101	12401.3	640.443	0.051643	43704.6	2774.23	0.0634768	1.75024	0.0739115	0.0422295
107	he_25103	11345.5	1514.03	0.133448	45417.8	4171.34	0.0918437	1.96854	0.0609065	0.0309399
108	he_25328	132.021	3.35472	0.0254104	381.896	26.2075	0.0686247	1.52354	0.128322	0.0842265
109	he_25375	5772.52	423.904	0.0734348	2438.2	31.7024	0.0130024	-1.26681	0.0910307	0.0718584
110	he_25409	3393.84	466.198	0.137366	14595.2	876.717	0.060069	2.05871	0.159596	0.0775226
111	he_25586	35.4624	12.2801	0.346286	1917.28	34.1857	0.0178303	5.74489	0.63811	0.111074
112	he_25588	19.7591	10.5051	0.531659	831.537	20.4359	0.024576	5.3844	0.531829	0.0987722
113	he_25668	20307.1	1719.26	0.0846631	8085.62	422.544	0.0522587	-1.25028	0.101109	0.0808688
114	he_25669	1407.66	144.579	0.102709	232.009	9.4339	0.0406617	-2.60104	0.181478	0.0697711
115	he_25673	1350.03	109.222	0.0809033	276.938	22.2376	0.0802979	-2.45457	0.144068	0.058694
116	he_25674	4562.97	364.065	0.0797868	364.717	12.5682	0.0344602	-3.70211	0.118298	0.0319541
117	he_25676	1479.43	119.379	0.0806926	356.835	5.47501	0.0153433	-2.05172	0.135435	0.0660106
118	he_25688	284.508	21.7782	0.0765468	86.749	7.00952	0.0808024	-1.71355	0.225383	0.13153
119	he_25699	10873.2	775.64	0.0713348	6869.44	109.613	0.0159566	-0.666232	0.101947	0.15302
120	he_25704	845.921	57.7745	0.0682977	85.6361	5.26941	0.0615326	-3.32676	0.1506	0.0452691
121	he_25712	9829.41	669.18	0.0680794	1290	47.0938	0.036507	-2.87025	0.13275	0.0462502
122	he_25753	622.065	47.5975	0.0765154	1048.31	17.325	0.0165266	0.752923	0.0848257	0.112662
123	he_25776	10264	998.959	0.0973268	3539.06	79.9106	0.0225796	-1.57432	0.108144	0.0686923
124	he_25777	181.46	42.1904	0.232506	27.9341	3.47943	0.124558	-2.69955	0.149255	0.0552891
125	he_26104	1859.52	122.742	0.0660074	784.333	42.1716	0.0537674	-1.21319	0.116955	0.0964027
126	he_26137	10439.7	921.008	0.0882217	892.358	10.13	0.0113519	-3.5655	0.105755	0.0296607
127	he_26246	21143.4	762.986	0.0360863	4882.83	219.818	0.0450186	-2.13841	0.0474563	0.0221923
128	he_26307	19119.6	763.692	0.0399428	25450.6	630.228	0.0247628	0.429339	0.0489852	0.114095
129	he_26540	23848.4	1070.43	0.0448846	6596.3	168.634	0.0255649	-1.80773	0.0650998	0.0360118
130	he_26559	627.092	55.7851	0.0889584	84.8345	9.41	0.110922	-2.85502	0.0931775	0.0326364
131	he_26755	802.476	106.947	0.133272	5580.66	274.336	0.0491584	2.84006	0.159473	0.0561513
132	he_27079	23.6222	11.2804	0.477532	595.17	31.4049	0.0527662	4.76545	0.585113	0.122782
133	he_27218	5718.74	608.288	0.106368	408.93	45.9528	0.112373	-3.73937	0.239264	0.0639852
134	he_27523	65.987	14.4644	0.2192	437.729	22.1005	0.0504891	2.79685	0.298587	0.106758
135	he_27671	2963.85	542.162	0.182925	2194.65	145.773	0.0664218	-0.422902	0.169495	0.40079
136	he_27706	7823.42	767.617	0.0981179	3268.8	150.756	0.0461196	-1.2541	0.157732	0.125773
137	he_27876	2500.83	163.073	0.0652075	949.368	60.6206	0.0638536	-1.48758	0.15246	0.102488
138	he_28378	15638.7	1851.29	0.118379	6185.89	319.703	0.0516826	-1.35722	0.182167	0.134221
139	he_28451	10238.6	1143.94	0.111728	1035.74	112.214	0.108342	-3.25838	0.266335	0.0817384
140	he_28473	80.7171	26.8989	0.333249	19781.9	2076.1	0.10495	7.93709	0.292459	0.0368472
141	he_28474	510.222	60.5788	0.11873	37403.6	1897.37	0.0507269	6.19181	0.198734	0.0320962
142	he_28476	159.111	32.856	0.206497	10502.3	583.535	0.0555628	6.17647	0.299498	0.0484902
143	he_28480	426.348	75.6526	0.177443	16176.4	808.8	0.0499987	5.33342	0.246925	0.0462976
144	he_28482	488.261	77.0509	0.157807	28656.8	990.812	0.0345751	5.90122	0.227077	0.0384797
145	he_28483	29.6661	12.3621	0.416709	1931.62	125.273	0.0648539	6.15115	0.581048	0.0944616
146	he_28711	2784.8	437.716	0.15718	11723.3	936.651	0.0798967	2.00033	0.117663	0.0588219
147	he_28713	1680.06	192.581	0.114628	10021.7	306.464	0.03058	2.61463	0.19214	0.0734864
148	he_28825	2179.69	145.749	0.066867	16960.6	991.817	0.0584778	3.00856	0.142443	0.047346
149	he_28827	472.197	25.658	0.0543373	15861.2	502.979	0.0317112	5.02688	0.0878297	0.017472
150	he_28866	14935.8	1905.93	0.127608	4948.2	174.808	0.0353275	-1.54972	0.211093	0.136214
151	he_28961	2602.72	208.022	0.0799247	716.9	36.7419	0.051251	-1.79211	0.0776703	0.0433402
152	he_28969	8056.54	875.223	0.108635	138.713	27.0092	0.194714	-5.85999	0.356118	0.0607711
153	he_29126	7257.09	756.091	0.104187	2391.87	104.014	0.0434863	-1.56691	0.185721	0.118527
154	he_2914	4711.61	432.156	0.0917215	1322.75	28.0487	0.0212049	-1.83765	0.117397	0.0638843
155	he_29304	4619.48	210.494	0.0455665	691.458	38.7206	0.0559984	-2.64947	0.0574533	0.0216848
156	he_2937	44.323	8.1583	0.184065	2304.08	96.0693	0.0416953	5.69999	0.279126	0.0489695
157	he_29411	14281.1	1767.28	0.123749	5189.84	151.145	0.0291233	-1.40162	0.19212	0.137071
158	he_29521	26695	4935.47	0.184883	63895	2478.4	0.0387887	1.18128	0.25985	0.219973
159	he_29648	7504.38	975.166	0.129946	906.428	61.35	0.0676832	-3.01378	0.262983	0.08726
160	he_2975	22137.2	2502.85	0.113061	13754.2	412.881	0.0300184	-0.725266	0.170971	0.235735
161	he_29964	11403.3	1459.3	0.127972	856.898	16.1793	0.0188812	-3.73418	0.198229	0.0530849
162	he_29970	4367.08	287.932	0.0659323	23497	1436.54	0.061137	2.50297	0.106437	0.0425241
163	he_30317	7060.35	815.63	0.115523	3169.4	190.134	0.0599905	-1.15553	0.230149	0.199171
164	he_30405	233.447	9.48852	0.0406453	1118.85	50.0274	0.0447132	2.24688	0.0198178	0.00882014
165	he_30566	8009.43	1002.08	0.125112	973.068	28.0711	0.0288481	-2.99947	0.164029	0.0546861
166	he_30695	22230.5	3186.62	0.143344	15098.3	642.508	0.0425549	-0.648978	0.204022	0.314375
167	he_30831	8780.93	914.326	0.104126	3343.75	111.262	0.0332747	-1.42446	0.160695	0.112811
168	he_30884	5415.26	705.746	0.130325	1485.62	54.4476	0.0366498	-1.91698	0.186348	0.0972093
169	he_30889	6588.24	776.799	0.117907	5093.9	328.615	0.0645114	-0.367594	0.0773645	0.210462
170	he_30905	3824.68	448.957	0.117384	2422.85	71.0845	0.0293393	-0.718605	0.157201	0.218758
171	he_31014	1123.14	138.786	0.12357	2879.64	103.675	0.0360026	1.26914	0.157904	0.124418
172	he_31018	70.6318	19.5715	0.277092	600.346	10.3857	0.0172995	3.08428	0.381941	0.123835
173	he_31019	1	0	0	236.548	35.7385	0.151083	7.87771	0.218802	0.0277748
174	he_31029	34.4342	11.8373	0.343767	2204.56	204.799	0.0928981	5.82386	0.628066	0.107844
175	he_31030	143.204	23.5514	0.164461	15568.6	1504.54	0.0966396	6.63961	0.150473	0.0226629
176	he_31031	30.9547	14.8389	0.479375	3122.03	289.676	0.0927846	6.52266	0.4043	0.061984
177	he_31032	170.172	21.6747	0.127369	14003.6	1739.17	0.124194	6.42267	0.115399	0.0179675
178	he_31033	16.4854	13.8932	0.842762	497.735	39.8097	0.0799817	4.91612	0.783986	0.159473
179	he_31035	19107	2631.91	0.137746	7720.77	788.286	0.102099	-1.31387	0.0707231	0.0538279
180	he_31077	49.1663	6.01019	0.122242	184.622	27.0328	0.146422	1.90647	0.0352026	0.0184648
181	he_31383	31.157	12.143	0.389737	540.819	40.05	0.0740545	4.0825	0.379121	0.0928648
182	he_31641	10334	1191.25	0.115275	25668	1565.39	0.0609862	1.30643	0.17802	0.136265
183	he_31698	682.317	100.835	0.147784	80.2318	4.91823	0.0613003	-3.13548	0.247872	0.079054
184	he_32	1349.01	130.831	0.0969834	76.0168	7.01536	0.0922869	-4.16487	0.0133675	0.00320959
185	he_32353	86.1988	24.8582	0.288382	3823.46	474.138	0.124007	5.33372	0.220559	0.0413517
186	he_32394	10627	1150.7	0.108281	29088.6	1806.85	0.0621155	1.45027	0.157006	0.108259
187	he_32726	5563.7	554.72	0.0997033	2332.65	248.695	0.106615	-1.25646	0.0186647	0.0148551
188	he_33216	7414.73	926.845	0.125	4558.04	395.783	0.0868318	-0.819885	0.0905299	0.110418
189	he_33220	3124.21	306.929	0.098242	1456.11	26.2507	0.018028	-1.10138	0.11629	0.105586
190	he_3332	5480.54	776.228	0.141634	14632.1	1335.4	0.0912656	1.41674	0.0701316	0.0495021
191	he_33592	5282.83	788.731	0.149301	34987.1	614.603	0.0175666	2.72744	0.185386	0.0679707
192	he_33594	858.232	146.032	0.170154	8416.7	233.033	0.027687	3.26017	0.191579	0.0587635
193	he_33647	11525.3	1541.93	0.133786	1031.54	81.2781	0.0787932	-3.62753	0.127984	0.0352814
194	he_33649	5902.48	467.855	0.0792641	298.084	30.9676	0.103889	-4.36146	0.191844	0.0439863
195	he_34254	2451.01	309.761	0.126381	1449.94	158.575	0.109366	-0.769447	0.205445	0.267004
196	he_35178	7719.62	795.28	0.103021	272.701	57.2461	0.209923	-4.79341	0.407753	0.0850654
197	he_35232	1027.12	44.8064	0.0436232	617.444	32.8005	0.0531231	-0.695786	0.133777	0.192268
198	he_35269	17.5445	10.5653	0.602201	773.441	40.5275	0.0523989	5.4622	0.765555	0.140155
199	he_35559	1884.34	175.34	0.0930514	391.078	33.1498	0.0847651	-2.37511	0.0618035	0.0260214
200	he_35606	19991.8	1502.04	0.0751328	4264.25	243.781	0.0571687	-2.22294	0.129477	0.0582457
201	he_35611	1749.26	101.319	0.0579208	199.749	43.3394	0.216969	-3.20125	0.39582	0.123646
202	he_35750	8632	1060.69	0.122879	3466.22	123.873	0.0357372	-1.28542	0.212456	0.165282
203	he_360	2.12437	1.08715	0.511753	111.324	24.8625	0.223334	5.79461	1.09825	0.189529
204	he_36376	941.031	108.754	0.115569	14860.3	1016.68	0.068416	3.91091	0.210753	0.0538886
205	he_36377	207.168	41.8818	0.202164	704.83	53.2255	0.0755154	1.76648	0.167075	0.0945807
206	he_365	125.793	21.7415	0.172835	3054.44	167.605	0.0548728	4.60178	0.172835	0.0375582
207	he_36506	168.43	42.4331	0.251933	506.219	46.4712	0.0918006	1.65352	0.280804	0.169823
208	he_36543	188.637	13.1179	0.0695404	62.0514	14.8987	0.240103	-1.62343	0.450188	0.277308
209	he_36553	45.9289	14.6147	0.318202	251.09	9.16511	0.0365012	2.45073	0.483282	0.197199
210	he_36556	437.313	52.4235	0.119876	152.486	14.1694	0.0929229	-1.50752	0.219662	0.145711
211	he_36597	1372.91	159.934	0.116492	90.7061	10.1829	0.112262	-3.92018	0.00622765	0.00158861
212	he_36616	14774.9	1774.78	0.120122	7006.43	285.532	0.0407529	-1.11588	0.118377	0.106085
213	he_36788	1231.61	113.781	0.0923838	856.82	78.6577	0.0918019	-0.515057	0.0100342	0.0194817
214	he_36832	9981.46	1248.09	0.125041	6345.33	421.269	0.0663903	-0.666804	0.0778363	0.11673
215	he_36910	19200.5	2340.53	0.1219	7343.05	513.569	0.0699394	-1.41161	0.0678234	0.0480469
216	he_3702	217.721	29.9842	0.137718	74.2767	7.58177	0.102075	-1.5484	0.346836	0.223997
217	he_37052	116.113	32.1494	0.276881	270.14	3.30991	0.0122526	1.21818	0.3322	0.272702
218	he_37317	12636.6	1436.99	0.113717	6415.35	594.863	0.092725	-1.12271	0.0854493	0.0761097
219	he_37851	10027.1	1081.52	0.107859	703.571	70.4034	0.100066	-4.03123	0.167945	0.041661
220	he_37854	8124.48	1138.91	0.140182	6706	596.96	0.0890188	-0.272565	0.0743092	0.27263
221	he_37889	120.745	22.4516	0.185942	5477.46	326.744	0.0596523	5.50348	0.155188	0.0281981
222	he_37892	61.9447	21.7403	0.350963	3802.86	168.4	0.0442826	5.82898	0.526064	0.0902499
223	he_37964	15.48	9.57822	0.618749	123.85	14.1569	0.114307	2.75565	0.806993	0.29285
224	he_38204	63.3819	26.177	0.413004	3043.58	83.634	0.0274788	5.57175	0.642128	0.115247
225	he_38247	6426.96	692.839	0.107802	1466.98	44.2037	0.0301325	-2.08676	0.180454	0.0864756
226	he_38407	11162.6	1927.15	0.172644	47017.9	4549.93	0.0967702	1.94929	0.141737	0.0727123
227	he_38409	14164.1	2726.24	0.192475	53654	4304.71	0.0802309	1.91141	0.247451	0.12946
228	he_38410	355.203	32.8359	0.0924427	181.511	17.3596	0.0956394	-0.830406	0.19578	0.235764
229	he_38575	26215.5	588.401	0.0224448	10968.7	676.552	0.0616803	-1.25703	0.0598755	0.0476326
230	he_38577	10303.7	315.512	0.0306212	6092.99	266.326	0.0437103	-0.761294	0.0229987	0.03021
231	he_38583	9540.02	256.049	0.0268395	2426.58	143.799	0.05926	-1.97507	0.0522366	0.026448
232	he_38587	11252.6	1048.16	0.0931483	3155.47	174.078	0.0551671	-1.83655	0.0632534	0.0344415
233	he_38779	829.874	39.6986	0.047837	269.326	42.2562	0.156896	-1.58733	0.173666	0.109407
234	he_38904	12347.8	615.079	0.0498128	10711.4	807.982	0.0754322	-0.205113	0.038747	0.188906
235	he_39302	16444.6	727.155	0.0442184	4538.09	312.279	0.0688128	-1.84345	0.0369785	0.0200594
236	he_39456	712.841	15.0692	0.0211397	423.737	18.3075	0.043205	-0.750412	0.0354701	0.0472675
237	he_39736	5525.62	136.298	0.0246665	311.707	27.9308	0.0896059	-4.12235	0.143291	0.0347595
238	he_39883	18824	729.453	0.0387513	6266.59	347.88	0.0555134	-1.55736	0.0314877	0.0202186
239	he_40110	6760.77	101.547	0.01502	2672.73	145.3	0.0543638	-1.33887	0.0552878	0.0412943
240	he_40142	9522.93	515.894	0.0541739	4116.26	281.393	0.0683613	-1.17773	0.0265085	0.0225081
241	he_40162	3734.84	168.665	0.0451599	1959.87	137.434	0.0701241	-0.93029	0.0446869	0.0480355
242	he_40174	1850.49	36.0642	0.019489	1218.88	63.6331	0.0522063	-0.646272	0.0691632	0.107019
243	he_40343	30316.2	1680.67	0.0554378	18188	1662.02	0.0913802	-0.736154	0.0511666	0.0695053
244	he_4037	7272.4	644.191	0.0885803	5906.14	28.3334	0.00479727	-0.297389	0.121041	0.407011
245	he_40709	3190.07	185.027	0.058001	565.645	18.9349	0.0334748	-2.47925	0.0472296	0.0190499
246	he_40719	29203.8	1381.38	0.0473012	17186	1482.98	0.0862897	-0.755523	0.05638	0.0746238
247	he_40953	6597.39	328.655	0.0498159	3604.59	195.238	0.0541638	-0.89398	0.0163582	0.0182982
248	he_40976	37.7511	6.84797	0.181398	206.643	1.77054	0.00856814	2.47365	0.306329	0.123837
249	he_41210	2138.54	328.075	0.153411	92.2688	16.9457	0.183655	-4.36648	0.173991	0.0398469
250	he_41259	12640.2	606.425	0.0479758	804.853	32.4855	0.040362	-3.99251	0.0208686	0.00522694
251	he_41264	37.7396	5.19833	0.137742	952.666	79.7817	0.0837457	4.71377	0.121692	0.0258163
252	he_41333	4857.88	205.104	0.0422209	296.406	39.8277	0.134369	-4.07594	0.184339	0.045226
253	he_41514	105.93	9.1186	0.086081	13.3785	8.22555	0.614833	-2.96248	0.761075	0.256904
254	he_41519	112.457	16.4726	0.146478	17.4911	5.96468	0.341012	-2.63184	0.444236	0.168793
255	he_41735	2647.72	374.712	0.141522	8017.15	252.293	0.0314692	1.64848	0.224941	0.136454
256	he_4201	347.422	38.3831	0.11048	2618.35	225.155	0.0859913	2.84607	0.0562182	0.0197529
257	he_42176	4.98293	1.26869	0.254607	95.3703	12.1001	0.126875	4.27641	0.554904	0.129759
258	he_42311	37.8375	10.7602	0.284379	424.625	19.7188	0.0464382	3.3863	0.423984	0.125206
259	he_42318	43.8763	10.6677	0.243131	981.204	53.8896	0.0549219	4.56808	0.358605	0.0785023
260	he_4234	3467.14	235.144	0.0678207	968.526	51.1147	0.0527758	-1.83988	0.172766	0.0939003
261	he_42549	6243.29	1065.68	0.170692	556.217	37.7486	0.0678667	-3.48859	0.14951	0.0428568
262	he_42966	4037.93	697.433	0.172721	13881.2	1198.48	0.0863385	1.71537	0.130127	0.0758596
263	he_43060	6214.73	849.963	0.136766	18644.4	1032.66	0.0553872	1.56931	0.143349	0.0913458
264	he_43348	4083.03	295.448	0.07236	1864.69	111.413	0.0597485	-1.22032	0.0617783	0.0506247
265	he_43686	10308.5	593.938	0.0576162	3692.29	190.809	0.0516775	-1.49456	0.0124204	0.00831039
266	he_43853	6985.62	487.365	0.0697668	4665.54	286.283	0.0613612	-0.577718	0.020784	0.0359761
267	he_44379	2281.79	64.6696	0.0283416	86.9938	13.8573	0.159291	-4.64487	0.187376	0.0403404
268	he_444	12818.6	1572.03	0.122637	6983.61	171.231	0.0245189	-0.887305	0.132479	0.149305
269	he_44807	1796.26	319.38	0.177803	528.453	27.6815	0.0523822	-1.76515	0.16332	0.0925251
270	he_4491	186.427	10.7906	0.0578813	56.1788	3.80421	0.0677161	-1.73096	0.0142167	0.00821316
271	he_45012	24044.1	1090.52	0.0453552	7775.78	516.063	0.066368	-1.52868	0.074758	0.0489035
272	he_45766	12517.6	925.328	0.073922	4760.14	332.838	0.0699219	-1.39388	0.00974553	0.00699167
273	he_46034	10119.1	651.006	0.0643342	396.227	11.7871	0.0297483	-4.67462	0.0478959	0.0102459
274	he_4609	2002.07	146.176	0.0730125	379.275	17.3769	0.0458162	-2.43668	0.05715	0.023454
275	he_46242	29221.9	2484.06	0.0850066	5009.79	274.912	0.0548749	-2.54423	0.0403337	0.015853
276	he_4625	23.9503	10.0217	0.418439	210.142	15.7945	0.0751615	3.22297	0.569758	0.17678
277	he_46408	17422.1	1568.23	0.0900137	11056.6	667.651	0.0603847	-0.695529	0.0474063	0.0681586
278	he_46744	66.2796	19.645	0.296396	4509.09	438.611	0.0972728	6.08813	0.221088	0.0363146
279	he_46823	20166.8	1665.42	0.0825821	9640.33	587.994	0.0609931	-1.09837	0.03922	0.0357075
280	he_46887	543.504	84.4232	0.155331	1247.98	77.2532	0.0619024	1.04567	0.211036	0.20182
281	he_47036	3038.64	379.801	0.124991	19449.7	1103.72	0.0567472	2.60069	0.12356	0.0475106
282	he_47085	14879.1	1221.14	0.0820707	7885.58	415.32	0.0526682	-0.981653	0.0694242	0.0707217
283	he_47213	12055.3	1048.13	0.0869434	4945.26	260.11	0.0525978	-1.36668	0.0785117	0.0574472
284	he_4723	8071.85	652.011	0.0807758	5381.94	62.1794	0.0115533	-0.603559	0.102816	0.17035
285	he_47479	1317.05	50.7331	0.0385203	347.65	20.7675	0.059737	-1.95679	0.115737	0.0591462
286	he_47496	6513.55	520.846	0.0799635	1085.87	44.1326	0.0406426	-2.64576	0.0904792	0.0341978
287	he_47498	4490.08	360.189	0.0802188	2098.03	115.573	0.0550867	-1.1362	0.113464	0.0998625
288	he_47505	5465.02	527.721	0.0965635	3450.43	261.821	0.0758808	-0.789606	0.0851629	0.107855
289	he_47514	4823.06	383.617	0.079538	1331.11	76.3216	0.0573368	-1.93769	0.059177	0.03054
290	he_47515	1385.46	259.718	0.18746	59.8606	13.1884	0.220319	-4.66744	0.163715	0.035076
291	he_47519	3226.44	326.764	0.101277	2395.79	19.7996	0.00826436	-0.425762	0.158285	0.371769
292	he_47544	9116.37	818.836	0.0898204	3468.17	157.222	0.0453327	-1.43877	0.119445	0.0830184
293	he_47546	8067.12	674.261	0.0835814	2721.01	132.454	0.0486783	-1.60951	0.126958	0.07888
294	he_47550	7585.34	662.968	0.0874012	3370.45	137.782	0.0408792	-1.15873	0.139685	0.12055
295	he_47551	850.475	82.9676	0.0975544	275	24.8433	0.0903392	-1.74778	0.129021	0.0738198
296	he_47552	8051.54	685.287	0.0851126	3651.86	124.01	0.0339581	-1.1537	0.127964	0.110915
297	he_47554	7006.24	564.435	0.0805618	2977.9	137.302	0.046107	-1.21625	0.14633	0.120312
298	he_47558	9496.82	944.998	0.0995067	3657.46	62.3532	0.0170482	-1.40055	0.135955	0.0970727
299	he_47874	13322.9	1276.95	0.0958461	4789.62	179.965	0.0375739	-1.468	0.144805	0.0986413
300	he_48015	1728.05	137.511	0.0795755	372.522	12.7907	0.0343356	-2.1866	0.0858231	0.0392496
301	he_48076	1710.79	239.487	0.139986	13216.1	661.634	0.0500629	2.86176	0.16563	0.057877
302	he_48830	38.4762	31.7854	0.826106	370.11	11.9503	0.0322884	3.18312	0.768046	0.241287
303	he_4902	317.283	53.0556	0.167219	34.3354	10.9445	0.318752	-3.23071	0.321972	0.0996599
304	he_4926	34.1942	13.9664	0.408443	226.421	10.1451	0.0448064	2.63468	0.401131	0.15225
305	he_49538	5577.58	402.109	0.0720938	2396.07	34.884	0.0145588	-1.21341	0.117565	0.0968876
306	he_49593	39.3992	5.9249	0.150381	173.601	25.0347	0.144208	2.1402	0.00900359	0.00420689
307	he_49594	1384.02	99.6044	0.0719675	6991.36	510.296	0.0729895	2.31936	0.137125	0.0591221
308	he_49595	175.581	38.6044	0.219867	548.928	67.1422	0.122315	1.63244	0.317856	0.194713
309	he_49596	1380.76	240.967	0.174518	9123.09	807.023	0.0884594	2.66259	0.109683	0.0411941
310	he_4967	9704.48	759.489	0.0782617	489.681	30.6148	0.0625198	-4.33386	0.138778	0.0320218
311	he_49808	4505.28	750.43	0.166567	10647	862.675	0.0810254	1.18387	0.11694	0.0987779
312	he_49811	58.8653	25.6433	0.435627	766.742	31.6015	0.0412153	3.6637	0.561804	0.153343
313	he_49813	3077.85	258.087	0.0838529	6564.72	446.398	0.0679996	1.17428	0.129877	0.110601
314	he_49836	6442.54	855.649	0.132812	35576.7	2481.06	0.0697383	2.52992	0.205002	0.081031
315	he_49840	481.669	21.5946	0.0448328	120.07	7.93321	0.0660717	-1.96113	0.140857	0.0718243
316	he_50065	3916.89	344.064	0.0878412	829.46	55.7231	0.06718	-2.21452	0.190344	0.0859529
317	he_50323	3264.5	564.1	0.172798	9232.77	451.346	0.0488852	1.4999	0.163596	0.109071
318	he_50521	10381.3	1001.99	0.0965187	674.221	34.8008	0.0516163	-3.91858	0.203834	0.0520172
319	he_5069	136.273	6.50037	0.0477012	1875.73	82.5478	0.0440084	3.71452	0.0440546	0.0118601
320	he_50707	8432.25	1360.32	0.161324	4488.99	211.402	0.0470934	-0.997843	0.234917	0.235424
321	he_50723	5994.12	432.241	0.0721107	62.5099	4.34617	0.0695277	-6.47992	0.14769	0.022792
322	he_50815	10739.7	1093.41	0.10181	776.276	41.8368	0.0538942	-3.78404	0.21672	0.0572721
323	he_5126	22065.2	2341.41	0.106113	10076.4	605.277	0.0600689	-1.22723	0.0851165	0.0693564
324	he_51342	5721.09	432.849	0.0756585	20003	1161.94	0.0580884	1.86529	0.133092	0.0713521
325	he_51344	1524.25	216.587	0.142094	9906.36	734.373	0.0741314	2.69882	0.0853985	0.031643
326	he_5138	1293.3	96.4211	0.0745543	245.189	4.4991	0.0183495	-2.38326	0.127089	0.0533257
327	he_51417	492.353	96.3526	0.195698	1499.38	130.443	0.086998	1.47632	0.18169	0.12307
328	he_51418	2406.34	229.558	0.0953972	4910.06	259.321	0.0528143	1.02189	0.163921	0.16041
329	he_51788	20.992	11.0563	0.526691	1352.66	71.6922	0.0530008	6.00982	0.91906	0.152926
330	he_51830	9.84121	11.2808	1.14629	299.158	31.6894	0.105928	4.92593	1.61003	0.326847
331	he_51888	9886.37	1012.63	0.102427	682.514	72.6079	0.106383	-3.81978	0.287918	0.0753755
332	he_52010	148.694	31.6728	0.213007	347.042	25.6544	0.073923	1.23892	0.272952	0.220315
333	he_52022	773.769	80.3702	0.103868	386.951	52.9715	0.136895	-0.999752	0.0454002	0.0454114
334	he_52106	3094.4	160.648	0.0519158	1527.96	99.9167	0.0653923	-0.996528	0.0491842	0.0493555
335	he_52245	10851	1086.88	0.100165	872.08	51.1357	0.0586365	-3.62602	0.222794	0.0614431
336	he_5226	12894.2	1523.36	0.118142	35624.3	1151.55	0.032325	1.46614	0.114997	0.0784353
337	he_52487	74.7205	7.51062	0.100516	15.418	2.14404	0.139061	-2.28024	0.0560138	0.0245648
338	he_52701	1654.15	189.634	0.114642	946.034	47.4671	0.0501749	-0.806123	0.202379	0.251052
339	he_52854	8815.42	977.034	0.110832	3884.94	166.341	0.0428167	-1.2866	0.132171	0.102728
340	he_52875	141.848	39.0898	0.275574	650.843	59.6633	0.0916709	2.14132	0.386078	0.180299
341	he_52910	23181.3	2584.39	0.111486	12312.1	700.973	0.0569337	-0.936609	0.0846096	0.0903361
342	he_52927	15934.4	1714.55	0.1076	5991.3	371.611	0.0620251	-1.42364	0.0729276	0.0512262
343	he_53032	9892.19	475.243	0.0480422	36309.9	2509.02	0.0691001	1.9125	0.114933	0.0600954
344	he_53033	217.575	3.67734	0.0169014	416.176	7.56484	0.018177	0.935662	0.00184054	0.0019671
345	he_53034	7528.67	1469.95	0.195246	34621.5	3202.02	0.0924865	2.19491	0.13026	0.0593465
346	he_531	682.676	104.929	0.153702	8234.08	562.484	0.0683116	3.60896	0.194209	0.0538129
347	he_53109	1845.95	383.359	0.207676	4016.45	481.062	0.119773	1.12156	0.104171	0.0928806
348	he_53133	9090.57	1189.25	0.130823	20765.3	1365.16	0.0657421	1.257	0.216209	0.172003
349	he_53189	24636.4	2884.77	0.117094	21106	1616.99	0.0766127	-0.237282	0.0639814	0.269643
350	he_53286	269.236	28.1693	0.104627	563.749	38.0308	0.0674604	1.14996	0.103392	0.0899098
351	he_53287	2559.79	293.032	0.114475	6658.12	327.776	0.0492295	1.39299	0.137198	0.0984917
352	he_5346	15244.7	1521.63	0.0998137	9205.41	471.459	0.0512154	-0.818793	0.0866151	0.105784
353	he_53548	85.6679	36.0103	0.420348	366.057	36.6169	0.10003	1.93131	0.388051	0.200926
354	he_53589	1728.23	101.064	0.0584783	5829.66	437.027	0.0749661	1.76439	0.0927899	0.0525903
355	he_53591	232.786	34.339	0.147513	620.704	35.3544	0.0569584	1.51177	0.196134	0.129738
356	he_5626	49.1723	16.9698	0.34511	445.108	16.2498	0.0365074	3.17662	0.366524	0.115382
357	he_5651	5281.32	395.633	0.0749118	1499.35	66.834	0.0445753	-1.9271	0.0994744	0.0516188
358	he_5727	8522.89	456.659	0.0535804	25662.8	1983	0.0772716	1.57544	0.0450036	0.0285659
359	he_593	95.0896	19.1947	0.201859	4747.5	371.964	0.0783495	5.64174	0.159555	0.0282812
360	he_596	30.87	5.22712	0.169327	850.334	33.6715	0.0395979	4.78375	0.192808	0.0403047
361	he_598	44.9485	12.5388	0.27896	1494.32	60.0737	0.0402015	5.01099	0.28502	0.056879
362	he_6015	178.775	43.019	0.240631	1310.23	62.4456	0.0476602	2.87048	0.225384	0.0785176
363	he_6041	28665.8	2960.04	0.10326	16701.4	556.841	0.0333409	-0.785889	0.0997851	0.126971
364	he_6831	3329.83	465.482	0.139791	19107	1672.43	0.0875296	2.5091	0.0739665	0.0294793
365	he_6833	140.823	13.1605	0.0934536	682.599	77.8292	0.114019	2.2152	0.0545588	0.0246293
366	he_6835	264.074	27.2321	0.103123	7079.04	292.175	0.0412733	4.80573	0.122157	0.0254189
367	he_6836	2858.57	484.128	0.16936	15705.7	1366.08	0.0869799	2.37796	0.116124	0.0488334
368	he_6842	4912.43	810.046	0.164897	14161.9	1249.46	0.0882268	1.45519	0.111786	0.0768184
369	he_7041	31593.8	1069.2	0.0338422	24264.7	1056.12	0.0435251	-0.363099	0.0255754	0.0704362
370	he_7043	4631.99	117.962	0.0254667	2180.83	115.737	0.0530702	-1.05705	0.0562184	0.0531842
371	he_7253	2772.02	134.059	0.0483613	1596.88	70.7138	0.0442826	-0.758702	0.0307755	0.0405634
372	he_7363	27236.2	1100.35	0.0404005	2207.97	76.0385	0.0344381	-3.67641	0.0303051	0.00824312
373	he_7822	49.8269	20.0514	0.402421	213.263	32.6295	0.153001	1.87941	0.314976	0.167593
374	he_810	14.9161	4.69509	0.314767	1151.9	25.6199	0.0222414	6.30747	0.493933	0.0783092
375	he_8209	679.59	35.2266	0.051835	63.9299	10.5245	0.164626	-3.4101	0.174798	0.0512589
376	he_8520	11055.3	513.672	0.0464639	4881.56	222.993	0.0456806	-1.18366	0.00280028	0.00236578
377	he_8535	233.977	44.5133	0.190247	620.553	41.4123	0.0667345	1.40719	0.170115	0.12089
378	he_8774	469.346	32.3538	0.0689337	184.976	0.918002	0.00496281	-1.33782	0.0962573	0.071951
379	he_8776	35456.6	1735.68	0.0489522	25411.6	1647.97	0.0648513	-0.470663	0.0216013	0.0458955
380	he_8778	37859.4	1862.65	0.0491993	28751.9	1946.23	0.0676906	-0.396992	0.0243622	0.0613668
381	he_8779	10355.2	563.609	0.0544277	9122.83	618.948	0.0678461	-0.179043	0.0182834	0.102117
382	he_8862	314.912	42.5244	0.135036	670.853	16.6657	0.0248425	1.09105	0.156686	0.143611
383	he_9047	4236.22	246.154	0.058107	1328.5	154.036	0.115947	-1.62785	0.0782712	0.0480824
384	he_9049	16921.7	2910.21	0.171981	6688.45	435.819	0.0651599	-1.40431	0.148675	0.105871
385	he_9053	1842.62	102.032	0.0553737	472.065	43.9419	0.0930843	-1.9647	0.048543	0.0247076
386	he_9058	2224.99	243.449	0.109416	830.696	111.507	0.134233	-1.32461	0.0600953	0.0453682
387	he_9059	2247.78	181.298	0.0806564	439.228	55.4894	0.126334	-2.34931	0.0796612	0.0339084
388	he_9068	14805.5	2535.22	0.171235	19867.4	1955.21	0.0984134	0.302086	0.141656	0.468926
389	he_9090	692.347	38.0601	0.0549726	271.577	24.9259	0.0917822	-1.33218	0.0544615	0.0408816
390	he_9307	295.635	20.8265	0.0704465	953.133	101.964	0.106977	1.61485	0.153152	0.0948398
391	he_9463	226.281	17.4106	0.0769422	8080.01	535.487	0.066273	5.14546	0.0150595	0.00292676
392	he_9634	15223.5	1107.31	0.0727369	8032.64	456.13	0.0567846	-0.94065	0.0249192	0.0264915
393	he_9637	177.429	23.0347	0.129825	36.8806	1.64003	0.0444688	-2.22545	0.151292	0.0679826
394	he_9638	185.299	8.05415	0.0434656	35.6706	3.66748	0.102815	-2.35338	0.180124	0.0765384
395	he_9646	16320	850.755	0.0521296	5380.73	566.81	0.105341	-1.61033	0.0893964	0.0555144
396	he_9720	39.2943	9.71657	0.247277	2732.4	187.075	0.0684656	5.96674	0.309056	0.0517964
397	he_9721	146.274	12.0768	0.0825628	7386.73	429.213	0.0581059	5.65819	0.0359075	0.0063461
398	he_9772	5482.21	362.156	0.0660603	4557.73	155.247	0.0340623	-0.297716	0.0531963	0.178681
399	he_9775	875.832	28.8077	0.0328918	256.042	12.0481	0.0470551	-1.77557	0.103183	0.0581127
400	he_9776	4893.97	328.136	0.0670491	507.781	27.9333	0.0550105	-3.27279	0.0255254	0.00779927
401	he_981	86.5212	21.0702	0.243526	5348.27	223.611	0.04181	5.96583	0.298131	0.049973
402	he_9860	452.122	118.844	0.262859	1102.56	179.859	0.163128	1.28608	0.107094	0.0832718
403	he_9882	12872.2	1041.23	0.0808897	888.386	31.9322	0.0359441	-3.86812	0.0613434	0.0158587
404	TU100,TU232	146.824	15.2147	0.103626	37.8628	4.9952	0.131929	-1.95523	0.322571	0.164978
405	TU126_1	120.711	29.9637	0.248225	21.0809	4.03609	0.191457	-2.94146	0.289215	0.0983235
406	TU206	637.718	59.7237	0.0936523	149.754	22.084	0.147468	-2.09032	0.0831367	0.0397723
407	TU285	4758.83	367.485	0.0772216	464.978	28.6347	0.0615829	-3.25891	0.117324	0.0360011
408	TU315	482.089	46.1843	0.0958005	83.6401	10.5748	0.126433	-2.52707	0.0548407	0.0217013
409	TU327	409.011	61.6012	0.15061	79.4576	9.62064	0.121079	-2.0958	0.235245	0.112246
410	TU371	99.8286	14.6208	0.146459	18.4635	1.22868	0.0665467	-2.4286	0.308134	0.126877
411	TU452	256.559	43.6772	0.170242	54.6504	10.8244	0.198066	-2.0655	0.180313	0.0872974
412	TU56	17078.1	308.33	0.0180541	521.631	35.2978	0.0676681	-5.00016	0.119277	0.0238546
413	TU600	877.567	26.2364	0.0298967	48.845	9.44877	0.193444	-4.18116	0.267458	0.0639675
414	TU757	434.88	83.1757	0.191261	44.5922	5.14026	0.115273	-3.55366	0.233629	0.0657431
415	TU79	1327.57	117.254	0.0883228	307.203	8.07118	0.0262731	-2.12089	0.0825242	0.0389101
416	xbz_1041	136.02	21.7173	0.159662	26.924	2.84377	0.105622	-2.27297	0.156168	0.0687066
417	xbz_10532	2057.87	269.849	0.13113	1215	37.9568	0.03124	-0.760192	0.137831	0.18131
418	xbz_10964	1135.77	140.197	0.123438	268.677	19.2324	0.0715819	-2.13498	0.0904214	0.0423523
419	xbz_11018	3541.57	477.487	0.134824	997.883	46.3099	0.0464082	-1.84091	0.163535	0.0888336
420	xbz_11034	11631.5	925.074	0.0795318	29749.7	1799.74	0.0604961	1.40595	0.124879	0.0888221
421	xbz_11316	8925.59	951.826	0.10664	2295.12	178.479	0.0777646	-2.01641	0.132402	0.0656624
422	xbz_11688	2458.67	134.3	0.0546232	1261.74	56.0273	0.0444049	-0.93648	0.112533	0.120166
423	xbz_11894	3294.03	448.88	0.136271	601.534	37.6427	0.0625779	-2.54777	0.130077	0.0510552
424	xbz_12	7278.93	993.231	0.136453	14326.9	493.48	0.0344444	0.889635	0.180027	0.202361
425	xbz_1241	534.589	36.0138	0.0673672	224.58	20.5236	0.0913866	-1.22557	0.0728348	0.0594292
426	xbz_12548	2323.91	22.7811	0.00980292	113.146	8.73846	0.0772319	-4.36423	0.124007	0.0284144
427	xbz_12775	23559.8	3070.39	0.130323	15270.7	574.223	0.0376029	-0.625559	0.140725	0.224959
428	xbz_12781	6625.98	567.088	0.0855856	2597.22	226.868	0.0873504	-1.32234	0.204791	0.154871
429	xbz_13680	4363.71	797.033	0.18265	2816.89	297.377	0.105569	-0.798921	0.15057	0.188466
430	xbz_13753	12955.1	811.643	0.0626503	29695.4	1912.09	0.06439	1.24471	0.113365	0.0910773
431	xbz_13754	7974.55	1161.35	0.145631	20028.2	1300.89	0.0649526	1.28188	0.10905	0.0850707
432	xbz_13756	10151.4	1286.76	0.126757	23049.7	573.943	0.0249002	1.18308	0.137812	0.116486
433	xbz_13760	249.78	55.0721	0.220482	75.1398	15.2094	0.202415	-1.73019	0.0266626	0.0154102
434	xbz_13761	16229.5	1937.62	0.119389	55230.7	3768.16	0.0682258	1.69556	0.121912	0.0719006
435	xbz_13762	588.242	61.2619	0.104144	172.177	11.5061	0.0668275	-1.91627	0.11447	0.0597358
436	xbz_13763	12327.9	1338.58	0.108581	44048.6	3042.55	0.0690724	1.7909	0.110571	0.0617406
437	xbz_13765	12032.6	1224.45	0.101761	44605.4	1767.1	0.0396162	1.89648	0.103869	0.0547693
438	xbz_13871	93.2978	12.4401	0.133337	278.978	18.3229	0.0656784	1.62519	0.126607	0.0779026
439	xbz_13911	3489.72	486.759	0.139484	14524.9	1486.67	0.102353	1.93832	0.133153	0.0686952
440	xbz_14049	23739	2148.25	0.0904944	13467.5	404.571	0.0300406	-0.788034	0.106871	0.135617
441	xbz_14050	663.474	89.8847	0.135476	151.268	24.7743	0.163778	-2.19348	0.077893	0.0355112
442	xbz_14070	904.814	75.233	0.0831475	136.683	6.88627	0.0503814	-2.62512	0.109158	0.041582
443	xbz_14076	16806.4	1433.94	0.0853211	7862.91	333.838	0.0424573	-1.02751	0.109524	0.106592
444	xbz_14113	804.755	33.1623	0.0412079	30.8637	9.87763	0.320041	-4.68905	0.529598	0.112944
445	xbz_14128	9630.54	1003.54	0.104204	3040.65	216.597	0.0712339	-1.69507	0.144071	0.0849943
446	xbz_14130	4236.57	421.386	0.0994642	1901.02	122.506	0.0644424	-1.16253	0.0685469	0.0589634
447	xbz_14512	73.8609	28.2586	0.382592	203.187	25.6392	0.126185	1.32829	0.353766	0.266332
448	xbz_14675	20161.6	2482.18	0.123114	5959.9	389.802	0.0654042	-1.71809	0.176984	0.103012
449	xbz_14983	17272.5	3552.2	0.205657	6688.64	744.537	0.111314	-1.47503	0.156222	0.105911
450	xbz_15144	37.0151	25.7311	0.69515	408.283	11.1707	0.0273603	3.46338	0.654248	0.188905
451	xbz_15227	6748.17	1194.22	0.176969	2042.15	252.917	0.123848	-1.7244	0.0677118	0.0392668
452	xbz_15625	11863.7	637.852	0.0537648	1213.38	65.977	0.0543746	-3.28349	0.0942822	0.028714
453	xbz_15821	1734.28	291.816	0.168264	15918.4	763.486	0.0479625	3.09671	0.184631	0.0596216
454	xbz_15823	386.687	85.4653	0.22102	14712.9	1751.14	0.119021	5.12953	0.137246	0.0267561
455	xbz_15847	18514.3	1496.67	0.0808389	5623.47	307.644	0.0547072	-1.71911	0.0406449	0.023643
456	xbz_16233	31928.5	3330.15	0.1043	65180.1	1792.35	0.0274984	1.03083	0.117049	0.113548
457	xbz_16514	3715.34	666.793	0.17947	22150.2	1849.52	0.0834991	2.57576	0.118376	0.0459576
458	xbz_16624	450.766	26.5722	0.058949	275.114	36.306	0.131967	-0.717405	0.105849	0.147545
459	xbz_16788	175.466	60.8113	0.346569	1191.11	85.1082	0.0714528	2.5741	0.383097	0.148827
460	xbz_17038	11403.1	693.473	0.0608143	3910.99	204.466	0.0522797	-1.5798	0.0334044	0.0211448
461	xbz_17152	49.1134	32.7874	0.667585	176.582	22.0309	0.124763	1.84615	0.58649	0.317683
462	xbz_1728	4930.96	623.773	0.126501	11778.9	450.239	0.0382242	1.25626	0.130321	0.103737
463	xbz_17454	10283.9	1721.22	0.16737	28544	1831.15	0.0641519	1.35855	0.179975	0.132475
464	xbz_18521	829.924	158.124	0.190529	8066.19	389.185	0.0482489	3.17547	0.23205	0.073076
465	xbz_19	1637.56	270.948	0.165458	665.802	104.816	0.157428	-1.29838	0.0131041	0.0100926
466	xbz_20066	959.4	184.92	0.192745	14457.2	1394.76	0.0964747	3.91351	0.120569	0.0308084
467	xbz_20067	152.382	42.5423	0.279182	519.734	71.1036	0.136807	1.61672	0.179253	0.110875
468	xbz_20363	71.0012	7.76061	0.109303	216.745	7.68339	0.035449	1.61395	0.106853	0.0662056
469	xbz_20511	5516.28	369.735	0.0670263	1432.61	103.487	0.0722368	-1.92672	0.0121857	0.00632458
470	xbz_21085	11633.6	2130.73	0.183154	46171.8	2036.73	0.044112	1.88747	0.235141	0.12458
471	xbz_21086	215.327	69.0202	0.320537	58.5424	8.49472	0.145104	-2.2491	0.348456	0.154931
472	xbz_21087	16005.4	2780.39	0.173715	56227.5	284.34	0.00505696	1.81272	0.22311	0.12308
473	xbz_2177	328.562	46.2918	0.140892	2382.87	204.561	0.0858464	2.77661	0.0854194	0.0307639
474	xbz_21862	17578.4	1497.41	0.085185	6127.3	401.818	0.0655784	-1.56648	0.0540809	0.0345239
475	xbz_22825	3282.35	50.8049	0.0154782	9431.05	340.902	0.0361468	1.48528	0.0489092	0.0329293
476	xbz_2283	131.923	33.6926	0.255395	31.8006	0.61672	0.0193934	-2.02879	0.344562	0.169836
477	xbz_23504	3654.96	700.905	0.191768	12764.3	355.351	0.0278395	1.80418	0.224439	0.124399
478	xbz_23536	6985.91	459.093	0.065717	18366.4	969.714	0.0527983	1.36352	0.0385118	0.0282444
479	xbz_23915	10313.4	705.477	0.0684036	3652.57	155.709	0.04263	-1.51958	0.0432709	0.0284755
480	xbz_250	809.089	72.9976	0.0902219	8644.12	569.518	0.065885	3.36944	0.11491	0.0341035
481	xbz_25639	4996.3	384.489	0.0769547	1131.64	73.8815	0.0652872	-2.14722	0.116729	0.0543629
482	xbz_25711	636.249	46.3078	0.0727825	1422.81	121.913	0.0856846	1.11104	0.0536453	0.048284
483	xbz_25897	13232.9	1166	0.0881138	5096.31	260.451	0.0511059	-1.39448	0.0669546	0.0480139
484	xbz_26076	7082.31	562.886	0.0794777	1274.63	100.708	0.0790098	-2.59545	0.107046	0.0412437
485	xbz_26095	3446.2	263.49	0.0764582	159.417	15.3117	0.096048	-4.48676	0.0720514	0.0160587
486	xbz_26118	10310.6	889.533	0.086274	3642.61	182.925	0.0502181	-1.52595	0.0576616	0.0377873
487	xbz_26123	9332.61	666.924	0.0714617	4017.44	186.825	0.0465036	-1.26717	0.0923476	0.0728772
488	xbz_26125	9223.08	782.864	0.0848809	3893.09	169.896	0.0436405	-1.26572	0.07911	0.062502
489	xbz_26127	7922.42	648.247	0.0818244	3238.85	137.133	0.04234	-1.32659	0.0866488	0.0653167
490	xbz_26373	1616.91	261.387	0.161658	12754.8	570.733	0.0447464	2.87099	0.175648	0.0611805
491	xbz_2650	16049.9	2547.18	0.158703	4394.89	143.351	0.0326176	-1.90888	0.186017	0.0974486
492	xbz_26952	414.733	56.931	0.137271	2657.82	316.471	0.119072	2.57856	0.0637121	0.0247084
493	xbz_27054	1051.89	54.9838	0.0522716	169.378	16.1339	0.0952541	-2.63466	0.0623852	0.0236786
494	xbz_27255	1199.16	255.877	0.21338	7513.1	684.512	0.0911092	2.52855	0.191101	0.0755773
495	xbz_27256	188.536	32.9073	0.174541	591.738	24.1879	0.040876	1.65012	0.172407	0.104482
496	xbz_27257	1481.16	182.929	0.123504	9181.74	251.871	0.0274318	2.63204	0.137928	0.0524033
497	xbz_27387	2843.78	364.019	0.128005	7130.46	314.725	0.0441381	1.26704	0.180692	0.14261
498	xbz_27398	5850.76	1050.78	0.179597	35426.3	797.91	0.0225231	2.57291	0.25212	0.0979901
499	xbz_27400	259.714	57.1706	0.220129	79.5299	10.6197	0.133531	-1.99883	0.24777	0.123958
500	xbz_27642	4220.25	258.126	0.0611637	10607.5	727.364	0.0685708	1.30508	0.023351	0.0178924
501	xbz_27866	6141.3	455.364	0.0741478	2219.7	82.0073	0.0369452	-1.46818	0.0542323	0.0369385
502	xbz_28240	4398.32	889.248	0.202179	20294	1361.59	0.067093	2.09348	0.212078	0.101304
503	xbz_28242	1596.4	283.117	0.177347	10260.2	519.833	0.0506649	2.60919	0.193031	0.0739815
504	xbz_28291	592.422	101.85	0.171921	1755.59	61.9861	0.0353078	1.48329	0.213124	0.143683
505	xbz_28632	18398.6	917.093	0.0498459	4895.81	227.343	0.0464362	-1.9292	0.0143585	0.00744271
506	xbz_29172	8503.16	1230.69	0.144733	34672.1	2837.15	0.0818282	2.0277	0.0786376	0.0387816
507	xbz_29174	9271.21	881.632	0.0950935	36981	1840.34	0.0497644	1.99595	0.0791976	0.0396791
508	xbz_29215	8290.87	1442.86	0.17403	20718.8	903.907	0.0436275	1.25029	0.246293	0.196988
509	xbz_29314	2070.04	393.372	0.190031	5502.93	167.912	0.0305133	1.3335	0.224919	0.168668
510	xbz_29532	1544.5	240.622	0.155793	5700.4	737.49	0.129375	1.8673	0.0311282	0.0166701
511	xbz_29533	159.246	49.9199	0.313476	507.626	58.3182	0.114884	1.54142	0.257712	0.167191
512	xbz_2993	52.6619	27.332	0.51901	432.204	32.3665	0.0748869	3.07488	0.570518	0.185541
513	xbz_3026	6842.97	1302.79	0.190384	21667.9	895.324	0.0413203	1.60363	0.210507	0.131269
514	xbz_3169	251.627	20.7531	0.0824753	1478.01	77.8433	0.0526677	2.63204	0.141966	0.0539377
515	xbz_3182	24958.7	2477.6	0.0992681	9902.45	416.915	0.0421023	-1.28658	0.142145	0.110482
516	xbz_3731	3937.28	309.541	0.0786179	19563.7	1261.54	0.0644838	2.3116	0.100754	0.0435864
517	xbz_3732	2.23063	0.811956	0.364004	98.4656	7.10586	0.0721659	5.51166	0.433023	0.0785649
518	xbz_3733	117.676	34.9478	0.296983	699.323	76.5321	0.109437	2.37722	0.312226	0.131341
519	xbz_3737	3527.67	289.895	0.0821775	17004.7	886.218	0.0521162	2.17549	0.119683	0.0550141
520	xbz_3740	110.62	19.5347	0.176592	20.7836	2.20024	0.105864	-2.40481	0.10309	0.0428682
521	xbz_3741	6240.05	627.465	0.100555	15560.2	1015.92	0.0652899	1.28589	0.143908	0.111914
522	xbz_4272	29.3652	26.3444	0.897128	200.894	9.05097	0.0450535	2.77425	0.792087	0.285514
523	xbz_4623	10084.5	989.271	0.0980978	4665.72	203.076	0.0435251	-1.15868	0.102547	0.088503
524	xbz_4638	330.851	56.6127	0.171112	707.497	50.0513	0.0707443	1.23296	0.235569	0.19106
525	xbz_4920	12281	2332.76	0.189949	3701.82	294.039	0.0794308	-1.85811	0.184179	0.0991216
526	xbz_4929	2301.64	299.413	0.130087	829.588	6.23116	0.00751116	-1.46614	0.186237	0.127026
527	xbz_5066	210.068	59.1124	0.281397	755.449	82.9371	0.109785	1.78146	0.228145	0.128066
528	xbz_5186	10886.8	1541.4	0.141584	6917.62	513.308	0.0742029	-0.718975	0.0993273	0.138151
529	xbz_5246	15385.2	1612.45	0.104805	5359.52	352.172	0.0657097	-1.58337	0.116896	0.0738277
530	xbz_5349	416.304	66.0045	0.158549	1023.68	40.0922	0.0391649	1.25256	0.243966	0.194774
531	xbz_5579	30712.3	5981.28	0.194752	71964.9	5361.15	0.0744968	1.08834	0.20221	0.185798
532	xbz_5580	36.9583	21.9879	0.594938	157.14	11.905	0.0757604	2.08808	0.687381	0.329193
533	xbz_6201	1330.51	217.89	0.163764	5024.86	375.947	0.0748174	1.88404	0.128795	0.068361
534	xbz_6473	1757.11	127.893	0.0727858	5183.8	407.394	0.0785897	1.49953	0.152529	0.101718
535	xbz_6475	5236.92	1083.77	0.206947	11572.4	1699	0.146815	1.09517	0.0909559	0.083052
536	xbz_702	4062.23	430.817	0.106054	10626.3	754.926	0.0710431	1.28871	0.107489	0.0834082
537	xbz_7110	301.528	60.2944	0.199963	698.981	28.8243	0.0412376	1.26643	0.25141	0.198518
538	xbz_7200	5927.19	470.143	0.0793197	1686.95	129.112	0.0765358	-1.87919	0.138743	0.0738314
539	xbz_7517	3021.24	395.572	0.13093	7424.03	500.603	0.06743	1.29706	0.0794176	0.0612288
540	xbz_7667	3223.95	423.414	0.131334	17821.1	491.212	0.0275634	2.46669	0.141604	0.0574064
541	xbz_8049	424.885	37.5986	0.0884913	1258.85	58.5609	0.0465196	1.66336	0.158732	0.0954282
542	xbz_8050	11018.8	1394.24	0.126533	28809.2	1923.67	0.0667726	1.28948	0.118422	0.0918373
543	xbz_8189	581.057	102.705	0.176755	1904.48	16.8162	0.00882983	1.69677	0.222305	0.131017
544	xbz_8207	206.029	26.4064	0.128168	828.16	39.973	0.0482672	1.92671	0.186158	0.09662
545	xbz_8328	425.002	30.4535	0.0716548	806.538	32.1271	0.0398333	0.915055	0.0616359	0.0673576
546	xbz_8337	11740.5	1814.61	0.15456	29349	2504.92	0.0853494	1.32182	0.0899878	0.0680789
547	xbz_8338	10592.2	1068.05	0.100833	25883.9	1711.65	0.0661282	1.23671	0.114845	0.0928635
548	xbz_8644	6241.61	1013.31	0.162348	573.226	8.20936	0.0143213	-3.47705	0.215686	0.0620314
549	xbz_9265	4751.88	431.116	0.0907253	1640.73	109.63	0.066818	-1.59669	0.0656522	0.0411177
550	xbz_9343	841.451	44.2282	0.0525618	1748.04	154.309	0.0882754	1.02236	0.120084	0.117458
551	xbz_9344	158.341	35.2037	0.222329	369.67	11.8726	0.0321169	1.22321	0.251373	0.205503
552	xbz_9572	814.761	84.4208	0.103614	509.054	6.31677	0.0124089	-0.662465	0.137321	0.207289
553	xbz_998	22473.8	2374.17	0.105642	8769.68	529.523	0.0603811	-1.40963	0.10696	0.0758777
554	he_25690	19047.2	1898.93	0.0996959	13079.7	639.419	0.0488863	-0.495885	0.0961266	0.193849
555	he_25728	1444.57	485.077	0.335794	135.755	59.2036	0.436108	-3.39914	0.154061	0.0453234
556	he_25733	1130.41	332.617	0.294246	59.3692	21.3328	0.359324	-4.33582	0.256271	0.0591056
557	he_25747	26249.3	2236.15	0.0851887	22014.1	737.601	0.0335058	-0.210776	0.0986322	0.467947
558	he_25748	4002.45	343.592	0.0858454	2461.58	186.152	0.0756227	-0.678437	0.103074	0.151929
559	he_37964	15.48	9.57822	0.618749	123.85	14.1569	0.114307	2.75565	0.806993	0.29285

## Sheet: 可检测转录子
Sample A							Sample B
No.	探针_ID	平均信号值	重复探针点间标准偏差	重复探针点间变异系数	可检测重复次数		No.	探针_ID	平均信号值	重复探针点间标准偏差	重复探针点间变异系数	可检测重复次数
1	he_1011	759.575	71.6753	0.0943624	3 out of 3		1	he_10021	20.6929	6.69357	0.323472	3 out of 3
2	he_1012	955.911	38.0511	0.0398061	3 out of 3		2	he_10106	16.2647	1.10795	0.06812	2 out of 3
3	he_10229	466.566	39.1422	0.0838943	3 out of 3		3	he_1011	105.723	7.43027	0.0702805	3 out of 3
4	he_10363	34985.1	5551.68	0.158687	3 out of 3		4	he_1012	638.244	50.5686	0.0792309	3 out of 3
5	he_10364	51.8921	11.5917	0.22338	3 out of 3		5	he_10229	215.93	35.4426	0.16414	3 out of 3
6	he_10527	7667.97	611.437	0.0797392	3 out of 3		6	he_10363	72917.1	5396.77	0.0740123	3 out of 3
7	he_10636	174.36	31.7192	0.181918	3 out of 3		7	he_10364	131.417	23.6977	0.180325	3 out of 3
8	he_11181	1995.03	230.174	0.115374	3 out of 3		8	he_10527	4657.64	324.768	0.0697281	3 out of 3
9	he_11553	751.551	114.744	0.152677	3 out of 3		9	he_10552	314.703	15.4834	0.0492001	3 out of 3
10	he_11555	1582.45	206.71	0.130626	3 out of 3		10	he_10636	354.398	29.2664	0.0825805	3 out of 3
11	he_11733	41.6681	2.4617	0.0590788	2 out of 3		11	he_11181	189.15	12.2783	0.0649132	3 out of 3
12	he_11751	50.4032	0.113403	0.00224991	2 out of 3		12	he_11413	555.702	26.7191	0.0480817	3 out of 3
13	he_11793	5904.92	443.649	0.075132	3 out of 3		13	he_11415	373.441	7.81702	0.0209324	3 out of 3
14	he_12051	50.1765	15.0968	0.300874	2 out of 3		14	he_11517	19.9425	3.34381	0.167672	3 out of 3
15	he_12052	28.0249	2.8485	0.101642	2 out of 3		15	he_11553	5583.79	231.551	0.0414685	3 out of 3
16	he_12202	1868.88	51.0738	0.0273285	3 out of 3		16	he_11555	6190.51	383.298	0.061917	3 out of 3
[truncated: 747 more rows]
